# Supplementary material for: Discovery of noncanonical translation initiation sites through mass spectrometric analysis of protein N termini
Source: PubMed Central journal article supplement — Genome Res. 2018 Jan;28(1):25–36. doi: 10.1101/gr.226050.117 (PMC5749180; doi:10.1101/gr.226050.117), 2018-01
Supplement: supp_gr.226050.117_Supplemental_Fig_S1.pdf [file supp_gr.226050.117_Supplemental_Fig_S1.pdf]

**Supplemental Figure S1. TISs identified using unmatched spectra from a previous human proteome map study**

- a. Codons for TISs corresponding to acetylated peptides mapping to 5' UTRs which led to N-terminal extension of annotated proteins.
- b. Codons for TISs corresponding to acetylated peptides mapping to 5' UTRs which encode an uORF.
- c. Sequence logo of nucleotides surrounding the TIS in cases where the TISs lead to N-terminal extension of annotated proteins.
- d. Sequence logo of nucleotides surrounding the TIS in cases where the TISs are located in an uORF.
