# Supplementary material for: Discovery of noncanonical translation initiation sites through mass spectrometric analysis of protein N termini
Source: PubMed Central journal article supplement — Genome Res. 2018 Jan;28(1):25–36. doi: 10.1101/gr.226050.117 (PMC5749180; doi:10.1101/gr.226050.117), 2018-01
Supplement: supp_gr.226050.117_Supplemental_Fig_S2.pdf [file supp_gr.226050.117_Supplemental_Fig_S2.pdf]

# **Supplemental Figure S2**

Ac-AAAAAAAAAAAAAAAAACGAR

Peptide identified from sample

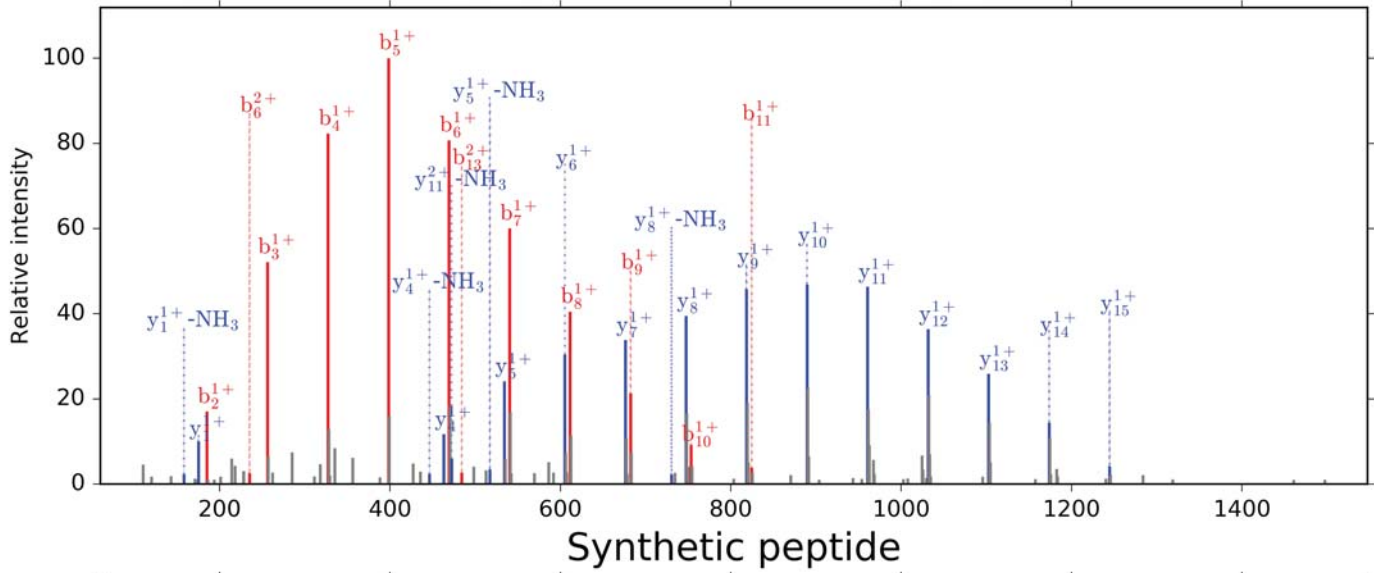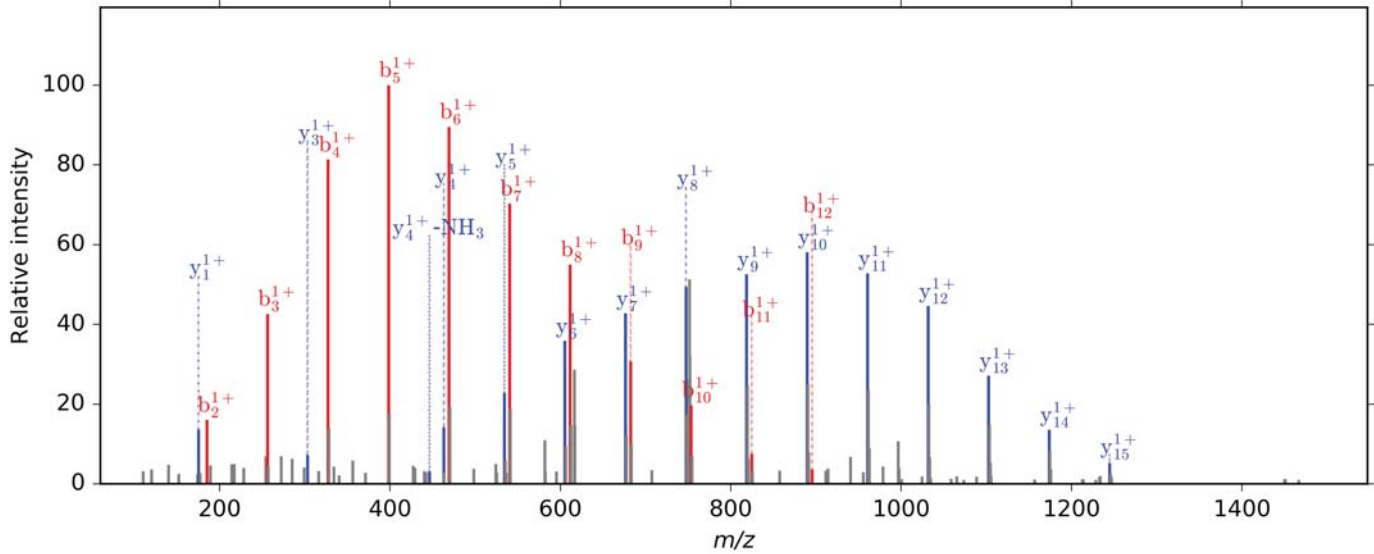

# Ac-AAPELPGGATIEAGAAR

Peptide identified from sample

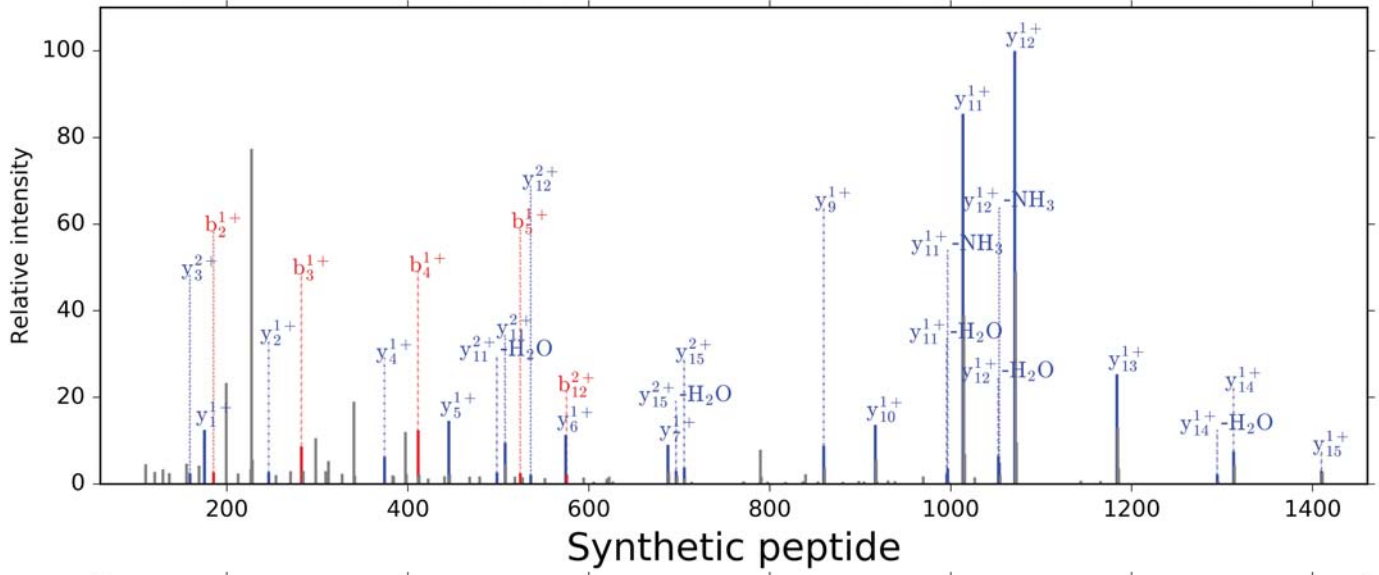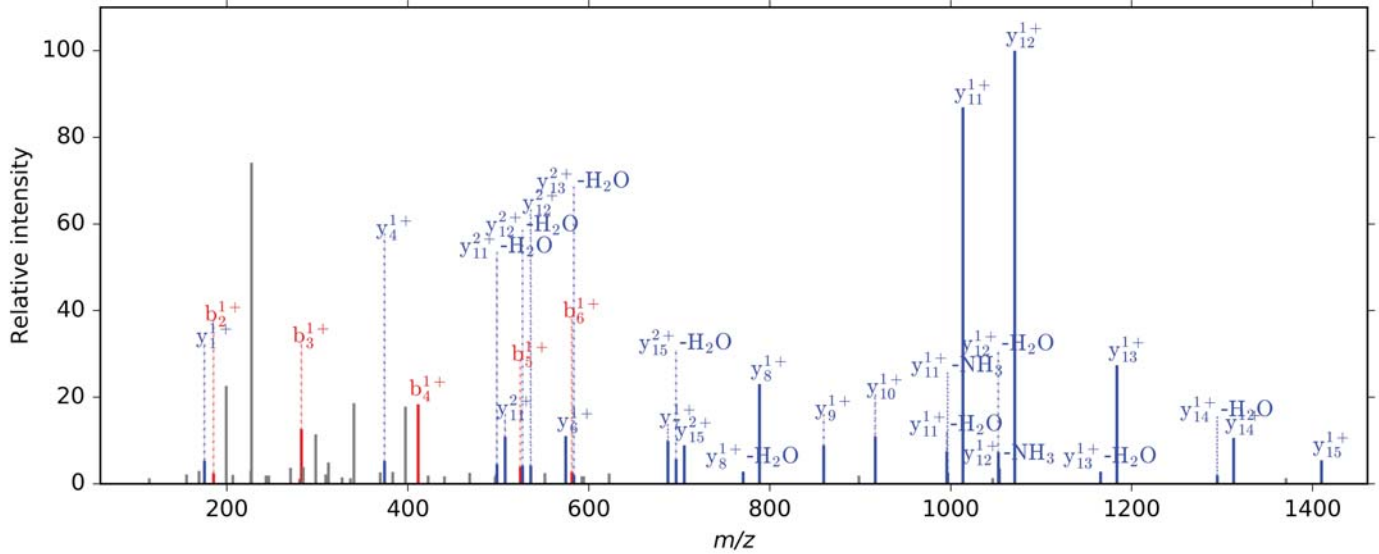

# Ac-AAPGGALASVSFDSR

Peptide identified from sample

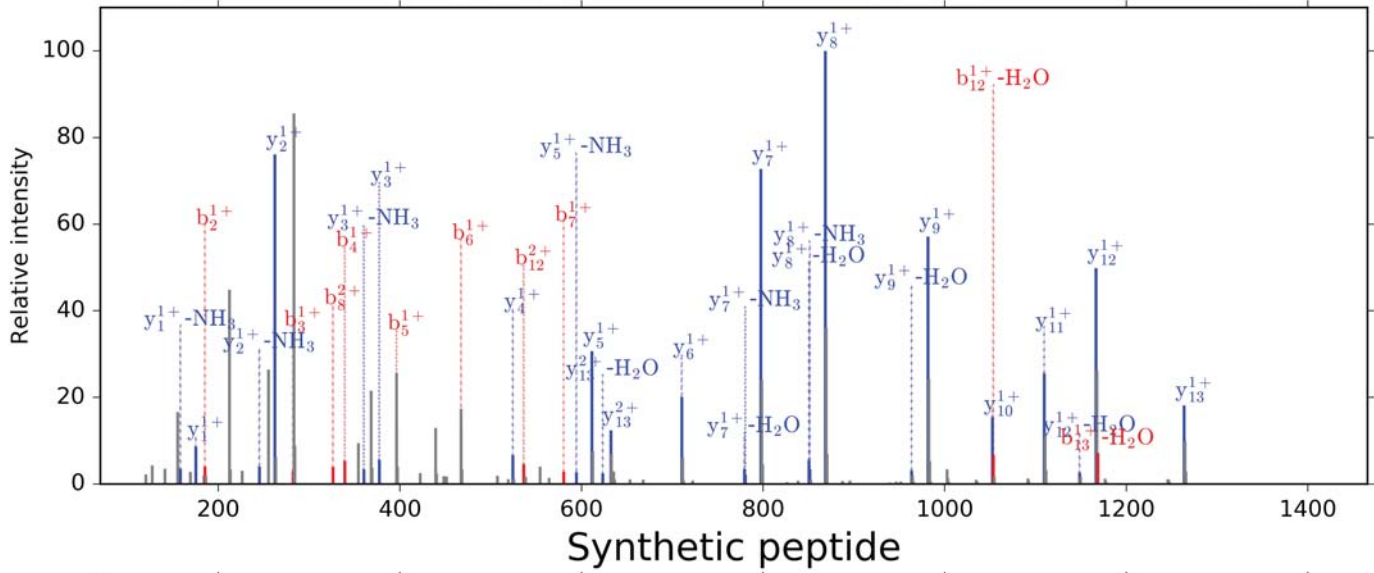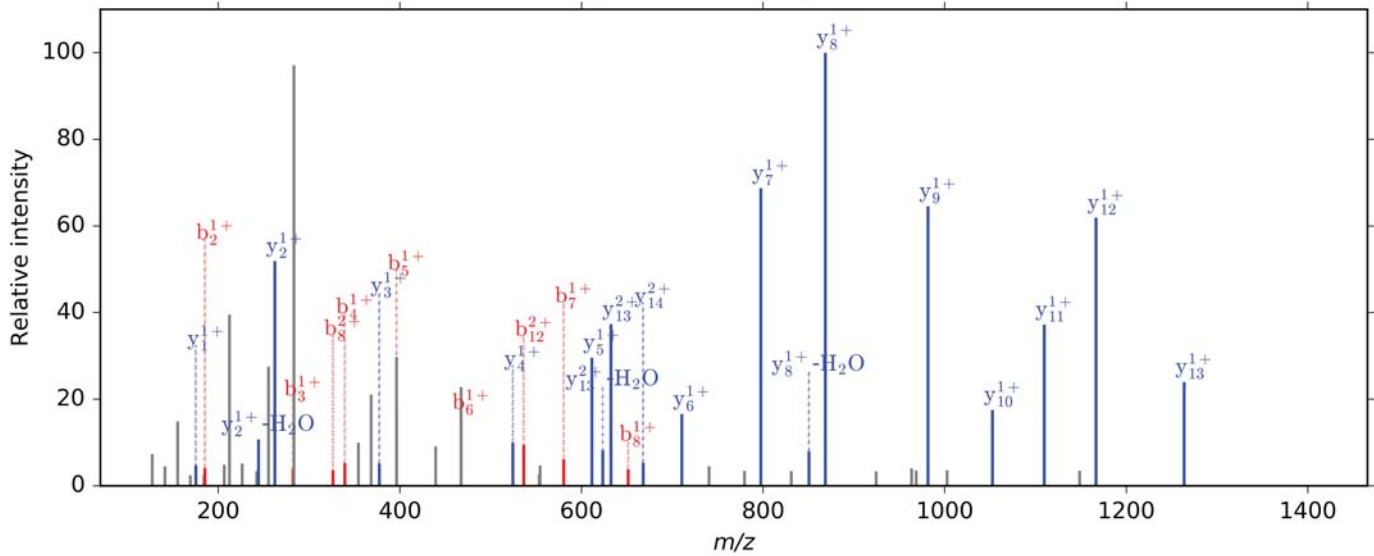

# Ac-AATAALIPLHR

## Peptide identified from sample

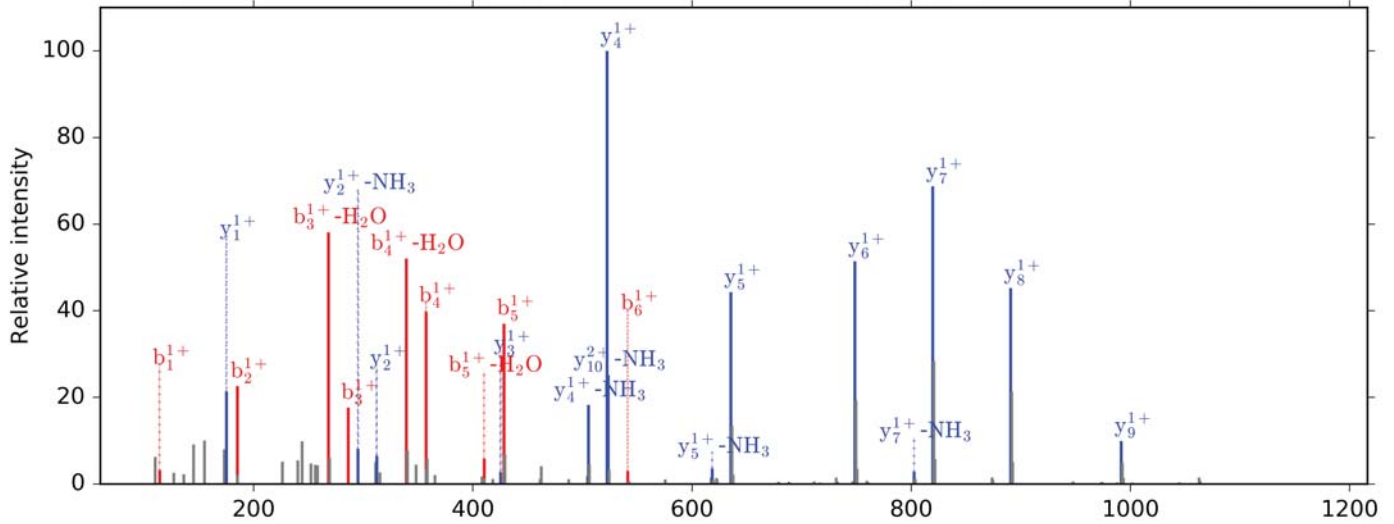

## Synthetic peptide

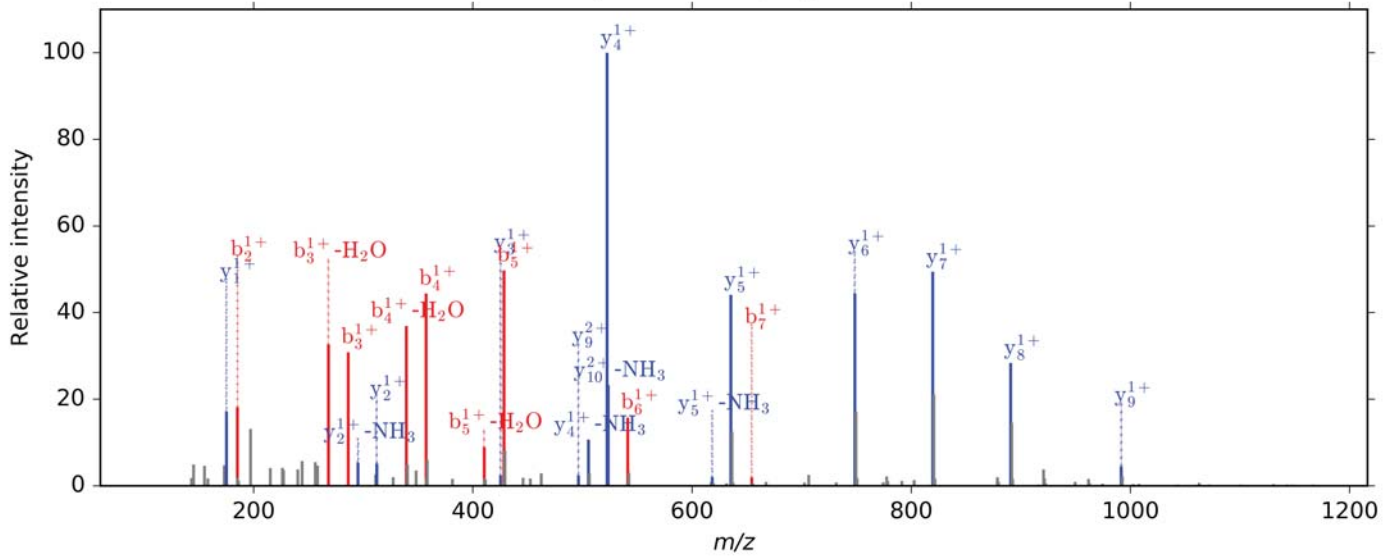

# Ac-AATAAVKEEEEPSGR

Peptide identified from sample

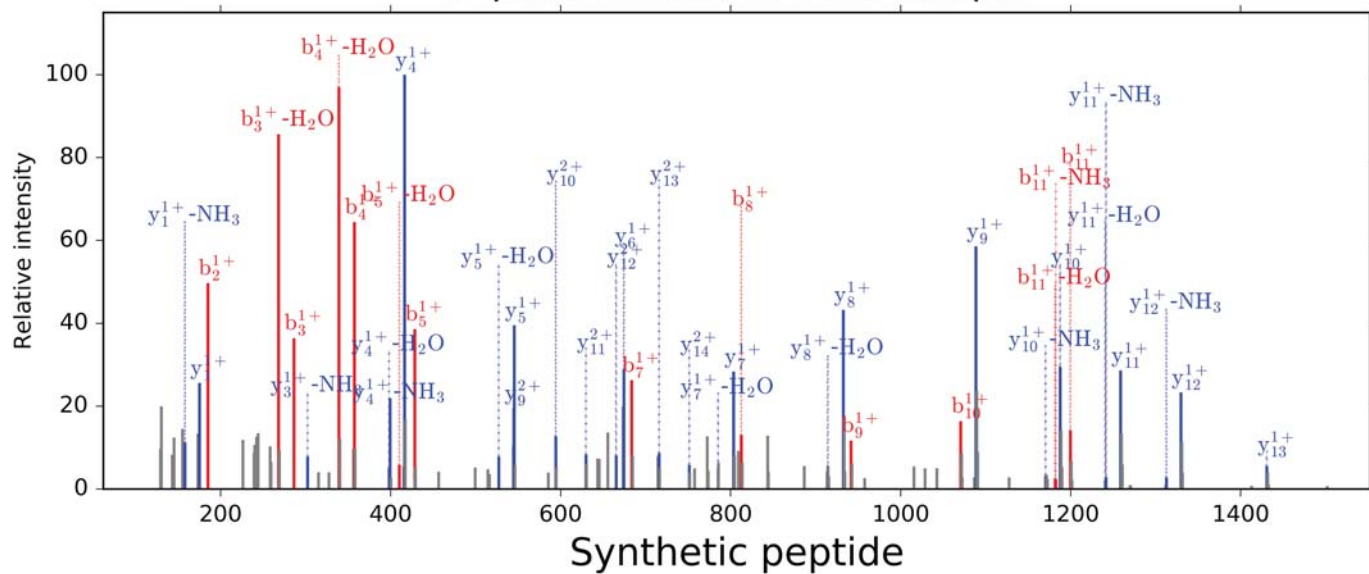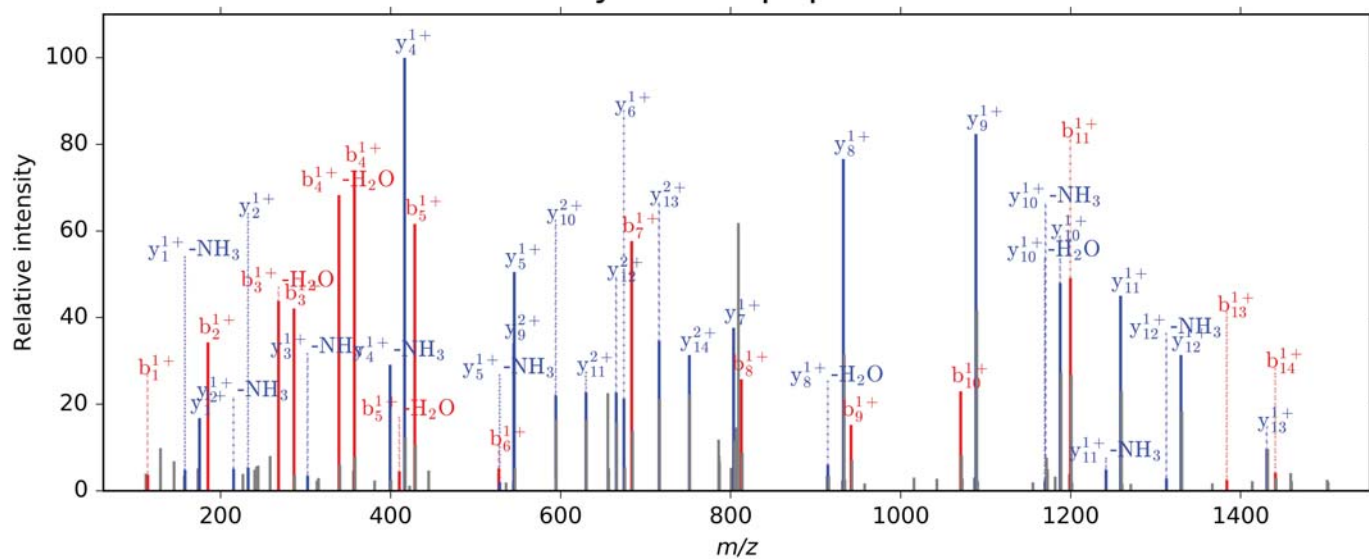

# Ac-AAVAAVGPR

## Peptide identified from sample

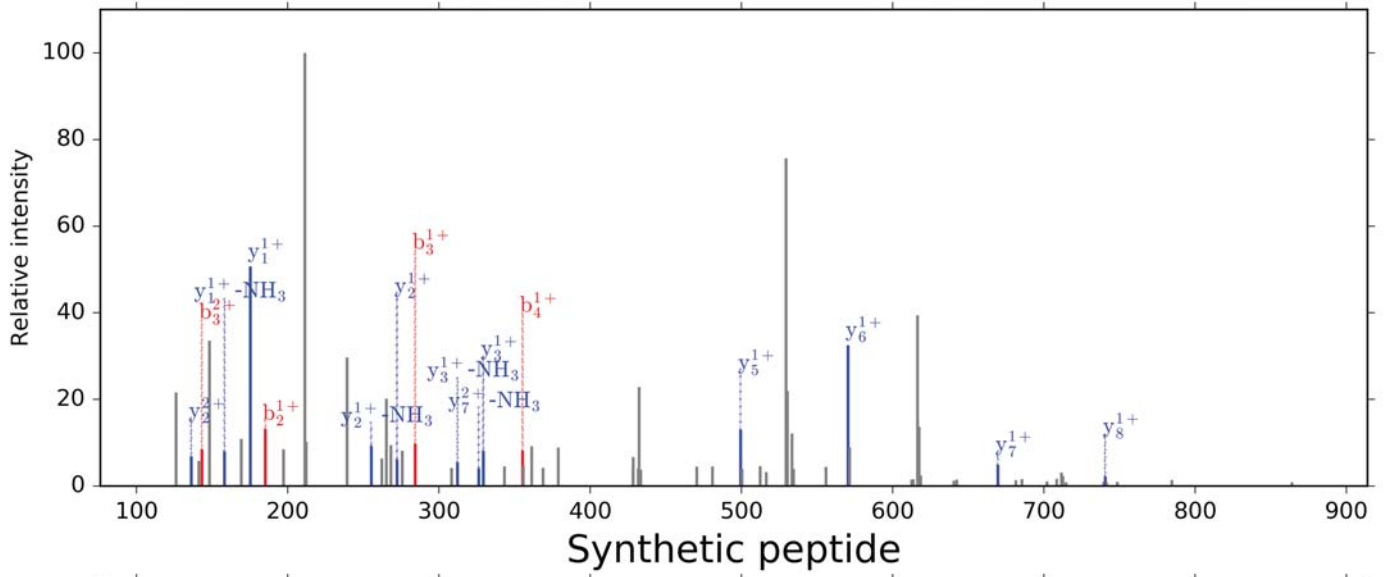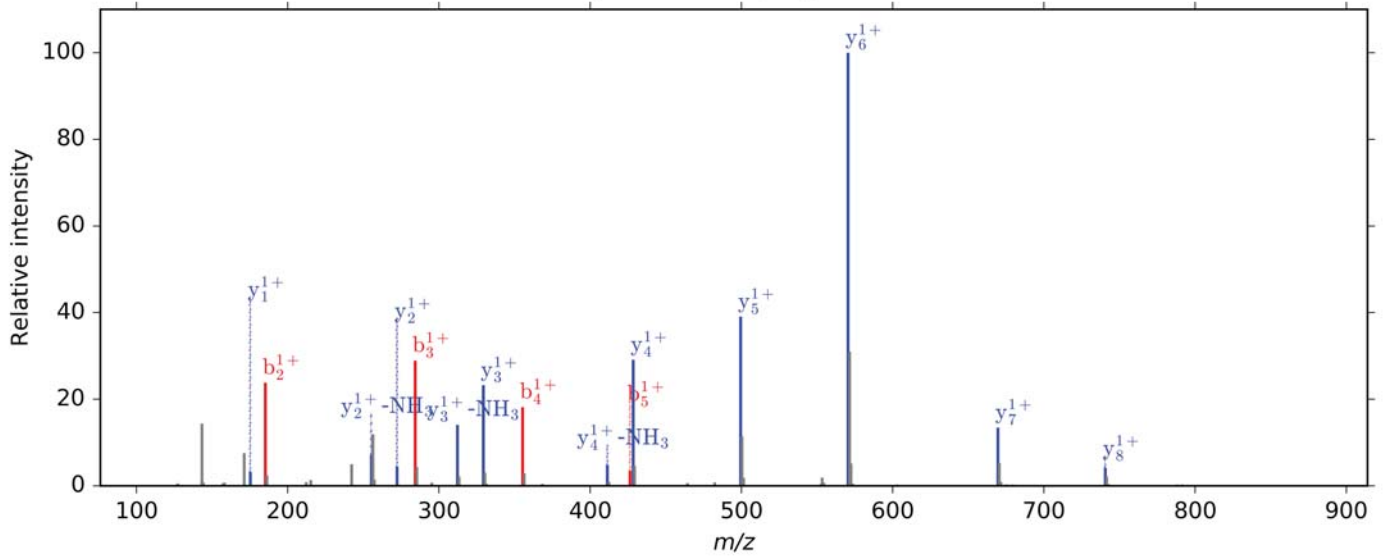

# Ac-AAWEAGLVGPAR

## Peptide identified from sample

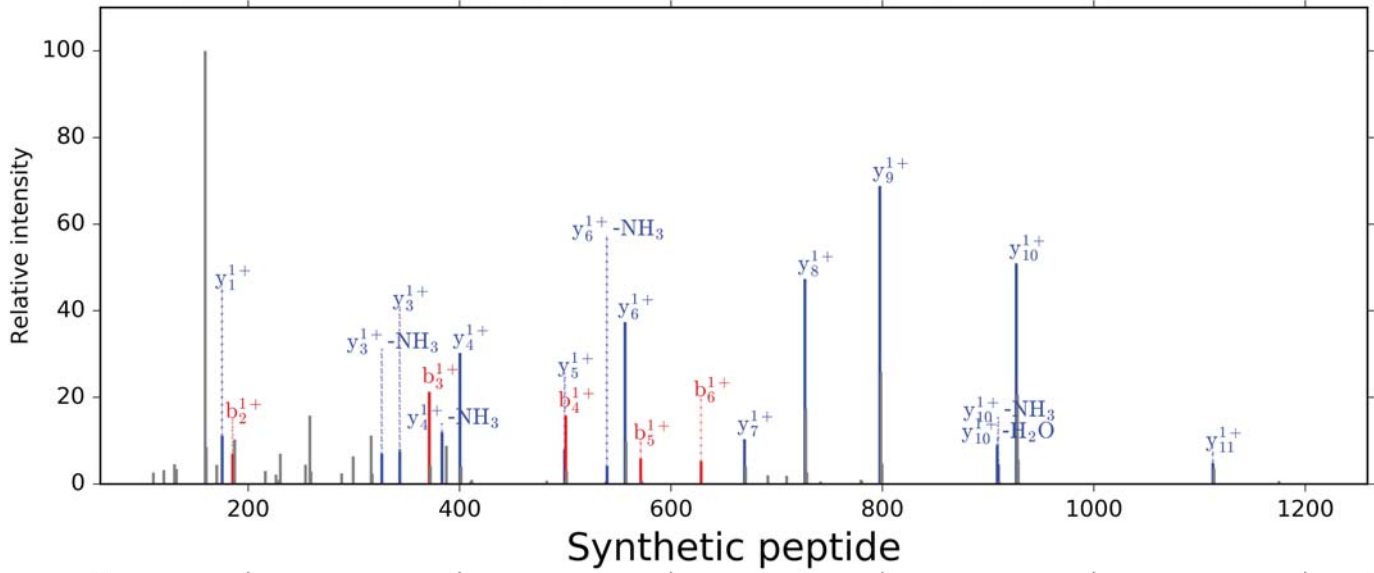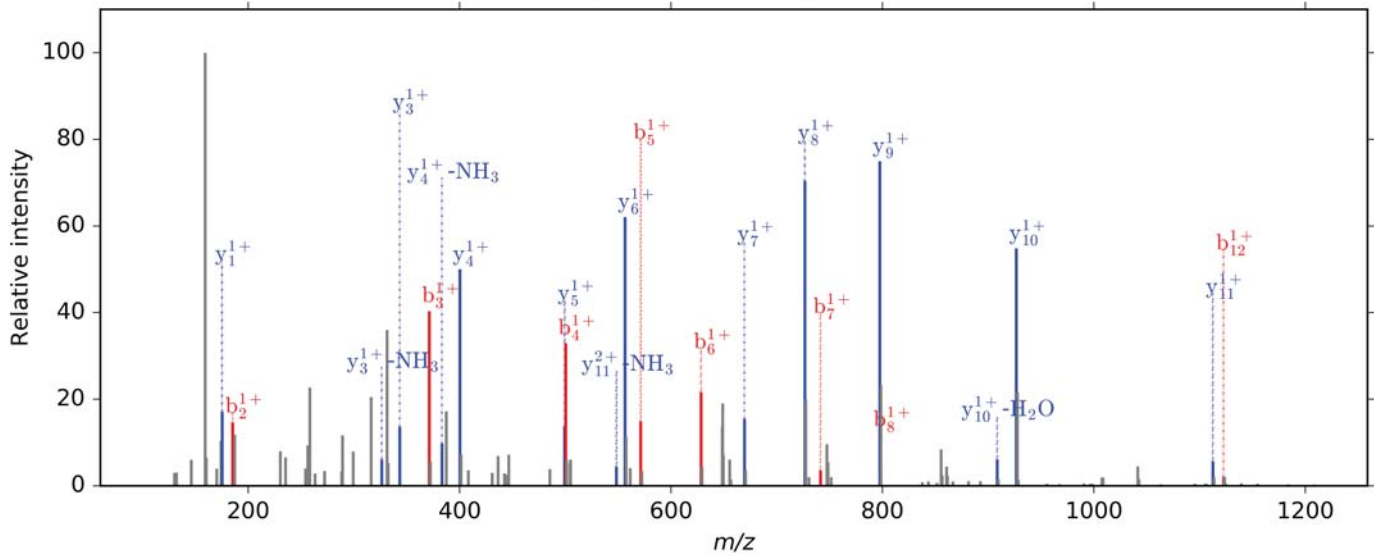



Ac-AEGGGAGEEPGAAAEAGRR

Peptide identified from sample

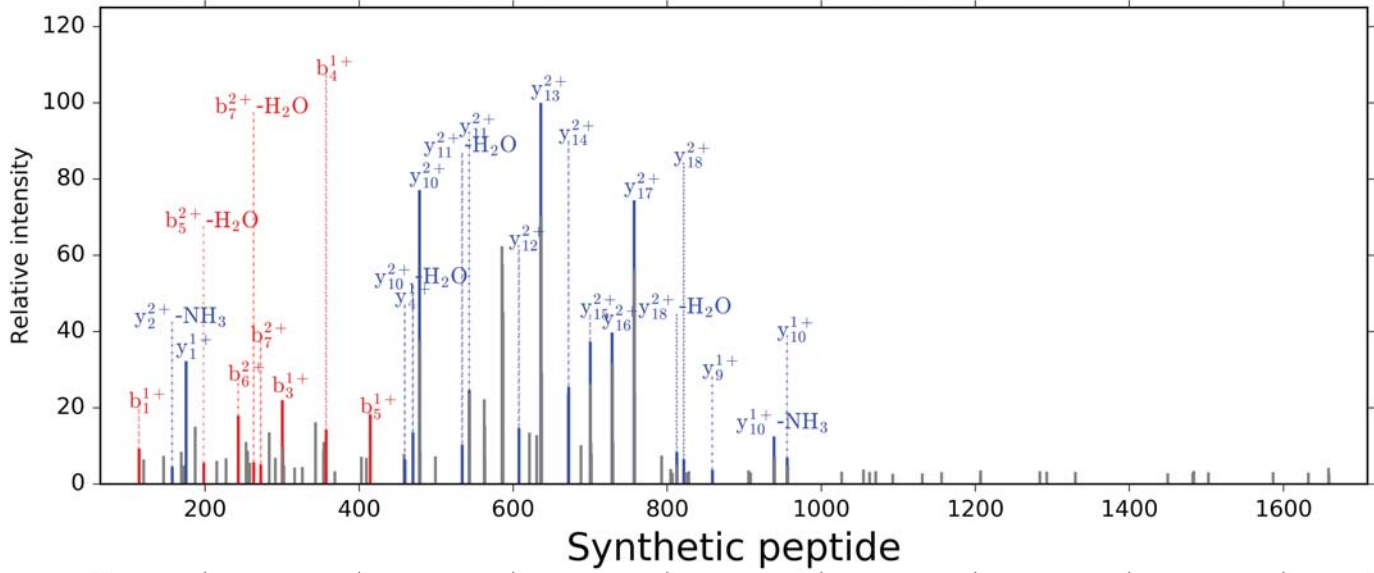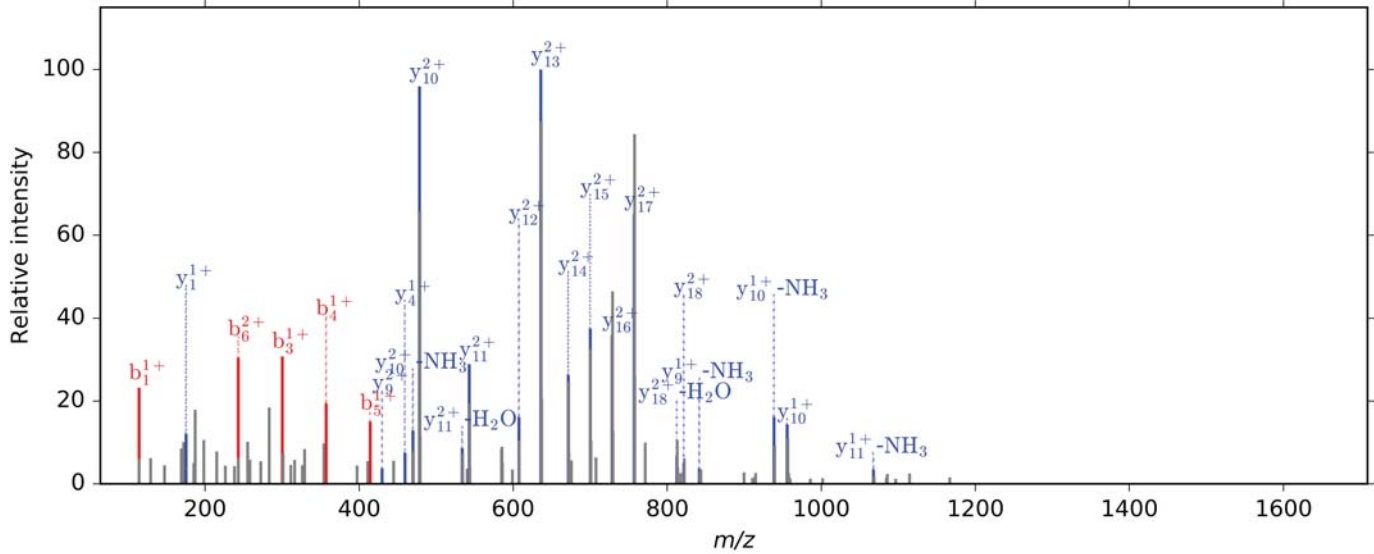

# Ac-AAAAEEAAAAGPR

Peptide identified from sample

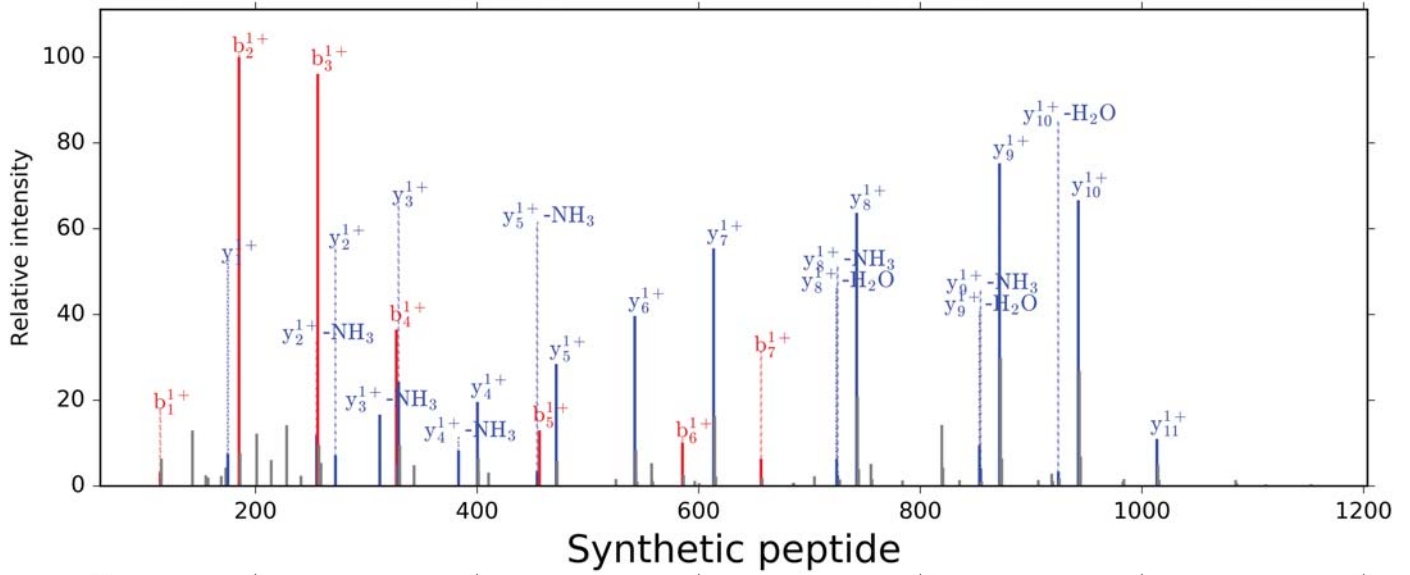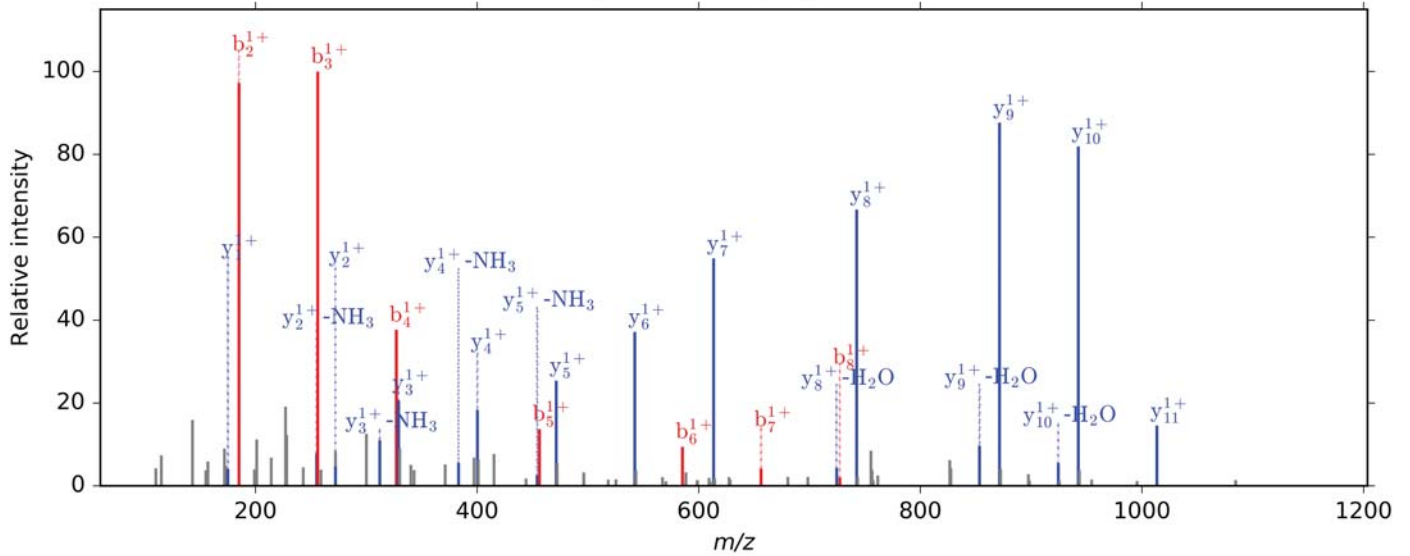

# Ac-AGAAHSPHGGQPPR

## Peptide identified from sample

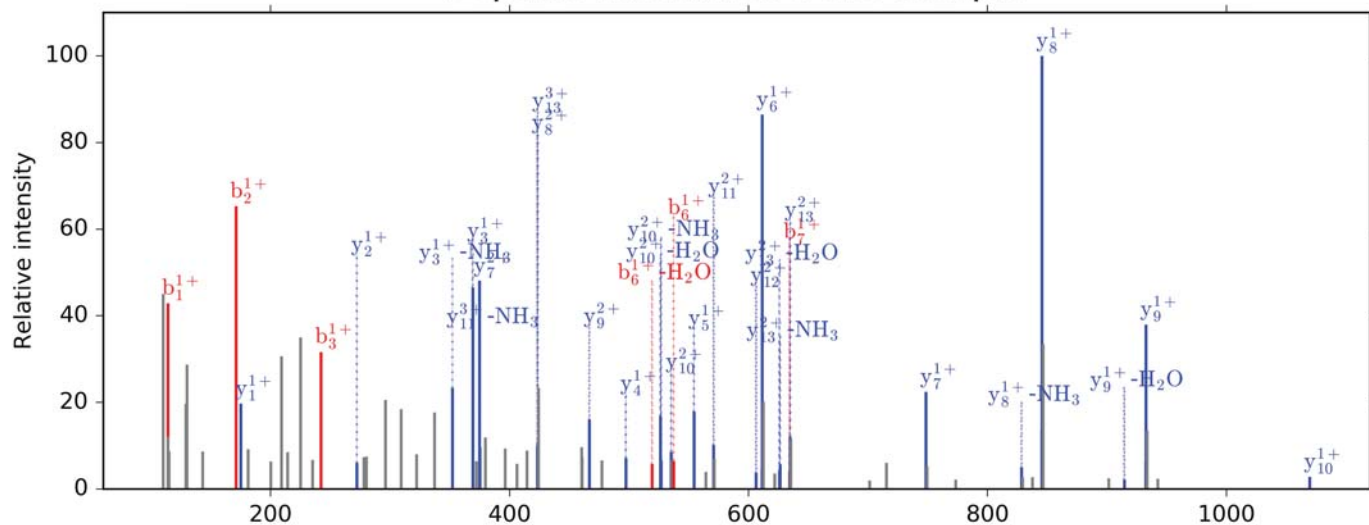

## Synthetic peptide

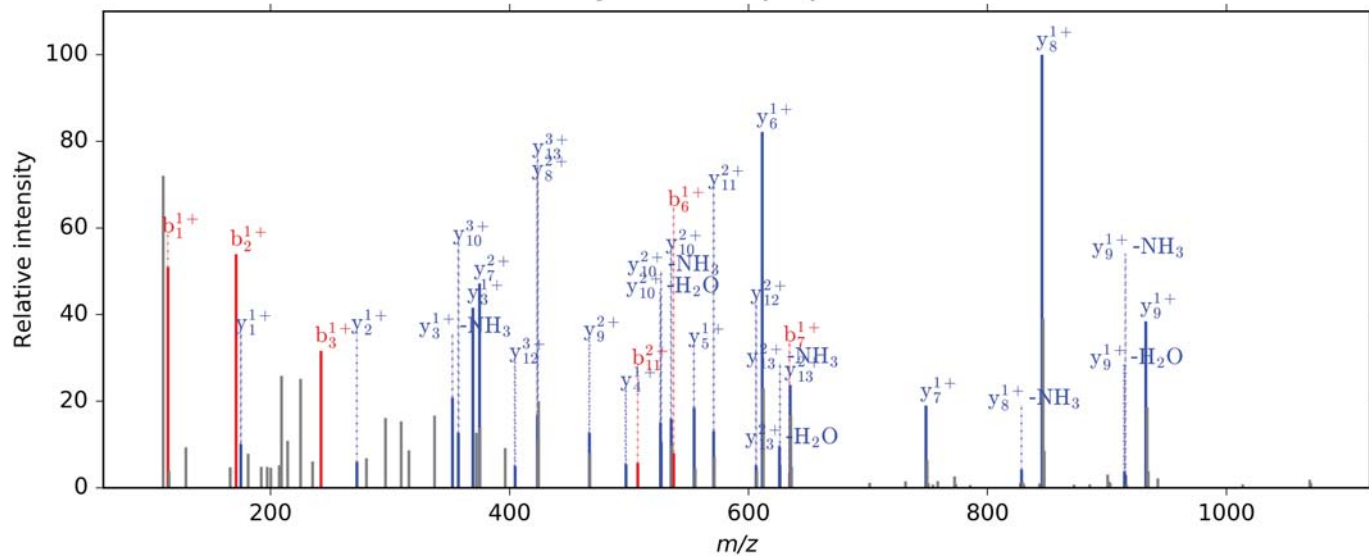

# Ac-AGDFPAWALTPR

## Peptide identified from sample

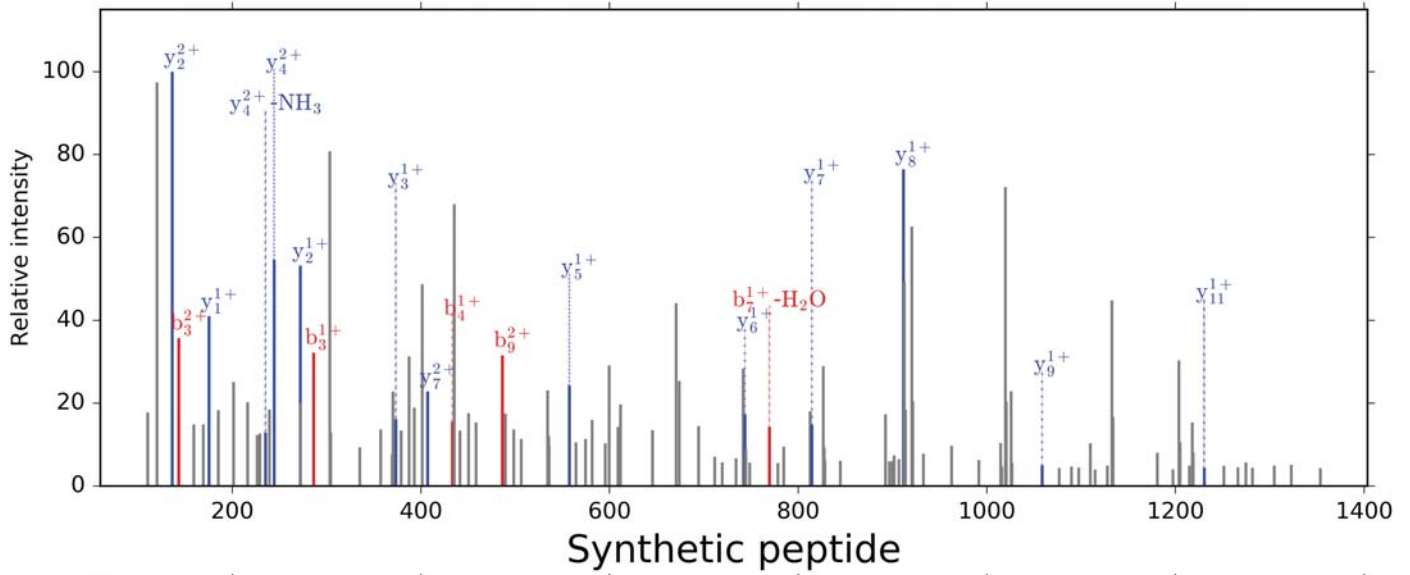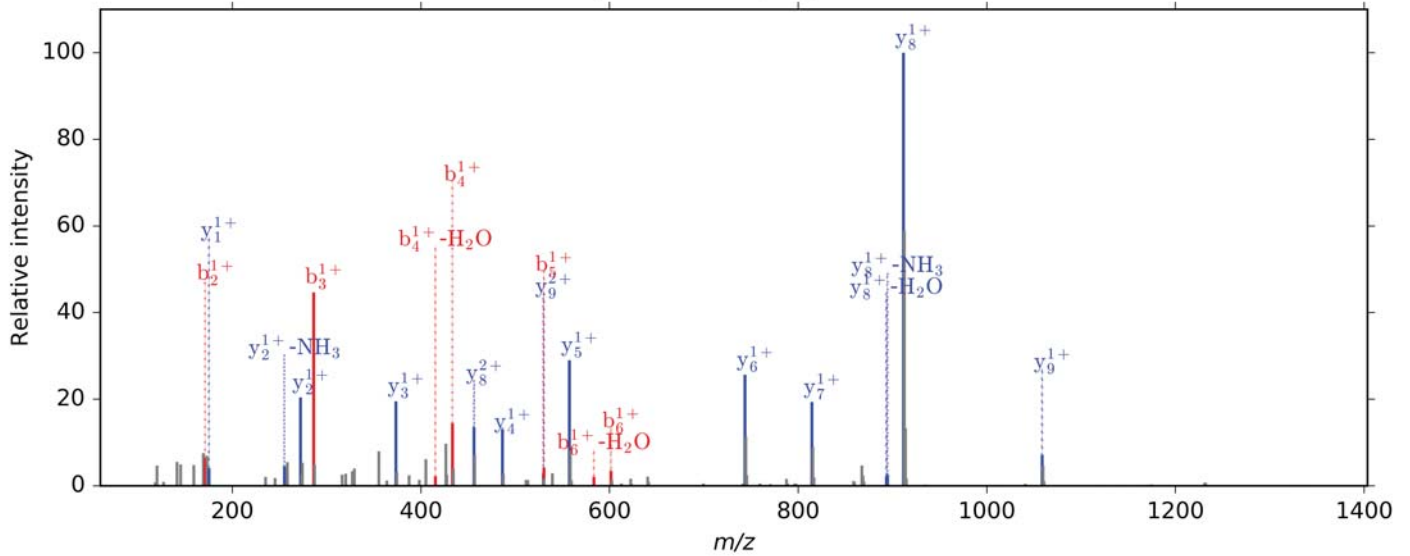

# Ac-AGGEAGADSLR

Peptide identified from sample

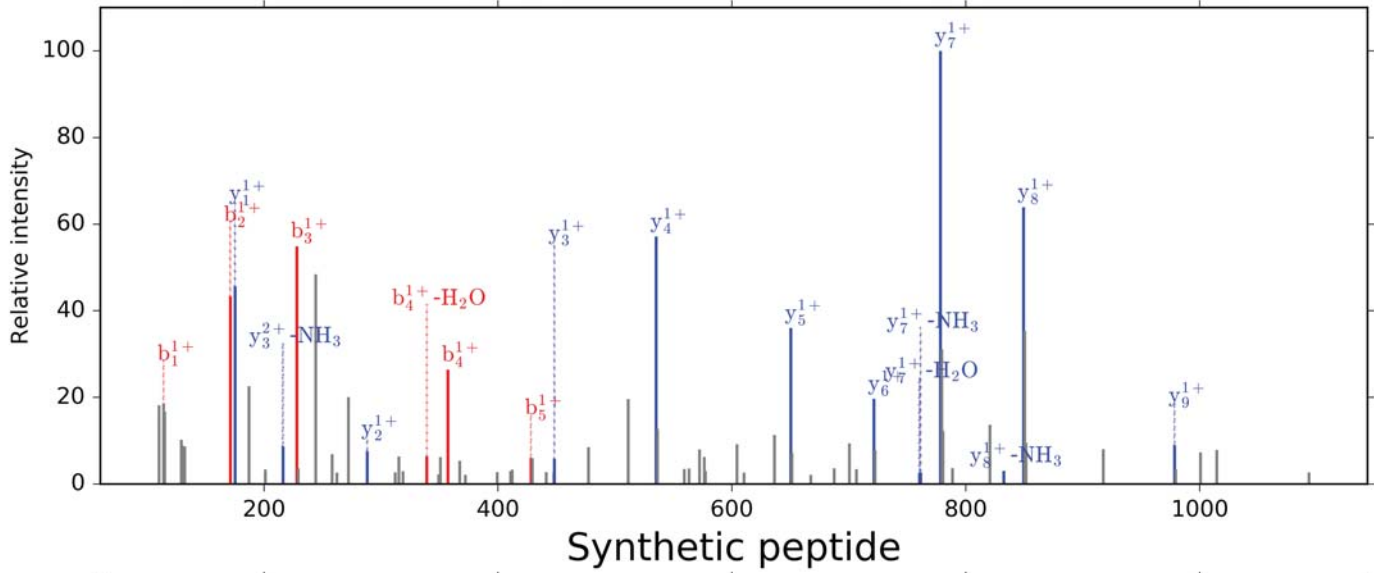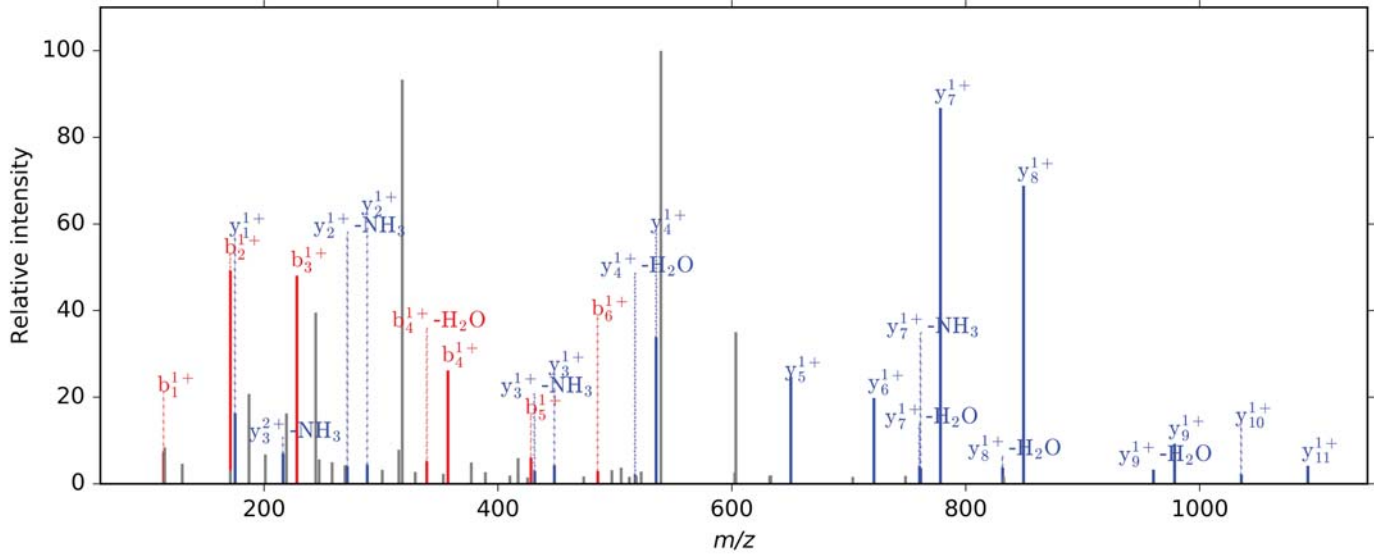

# Ac-AGGEEKLGGVPGPEGR

## Peptide identified from sample

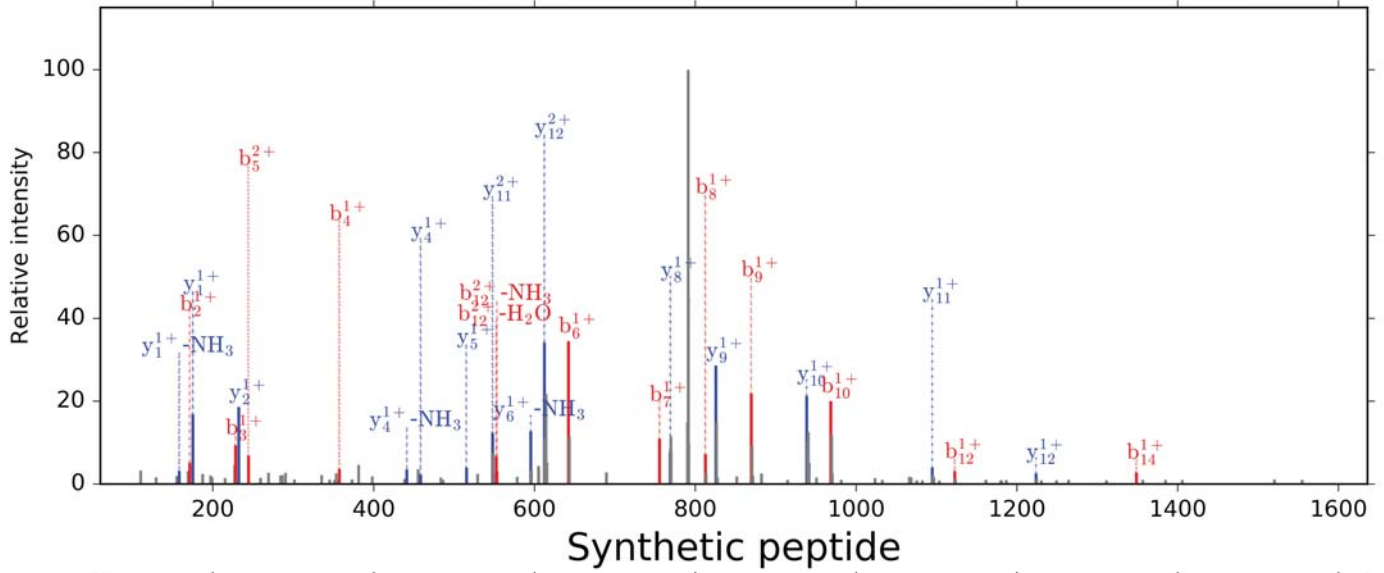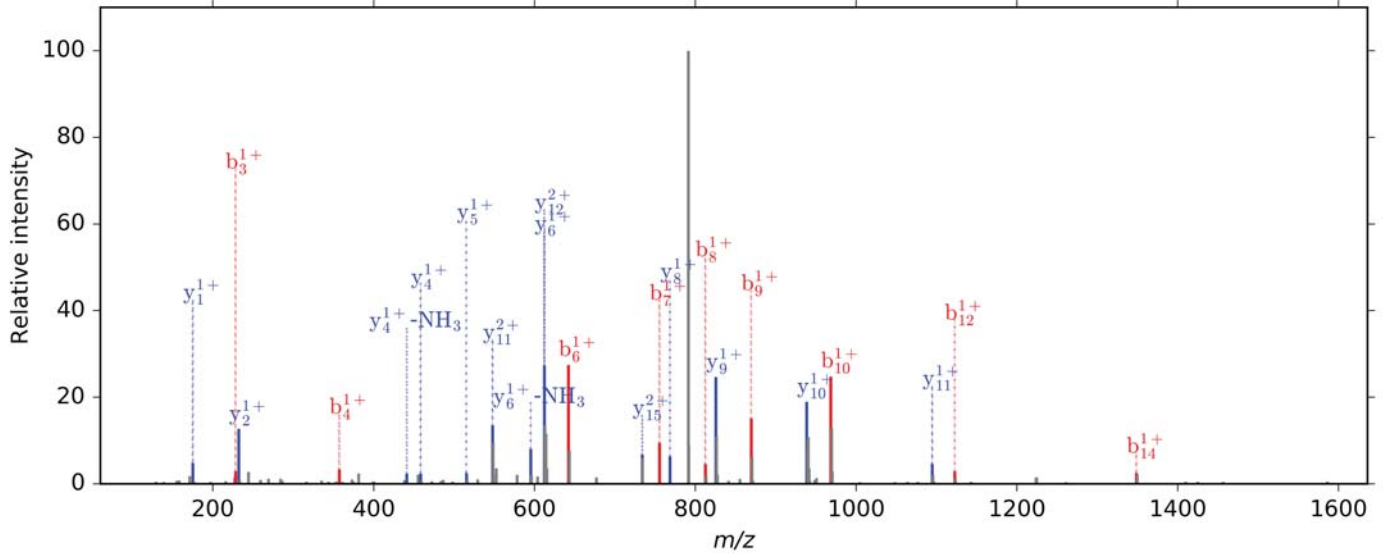

# Ac-AGSFDSNFPR

## Peptide identified from sample

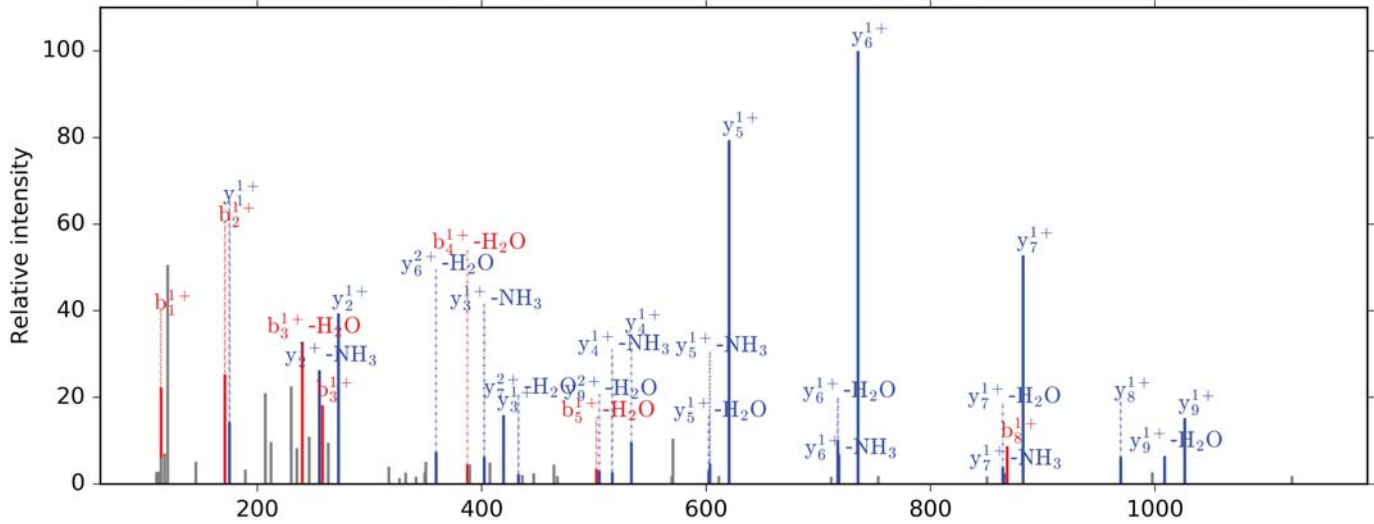

## Synthetic peptide

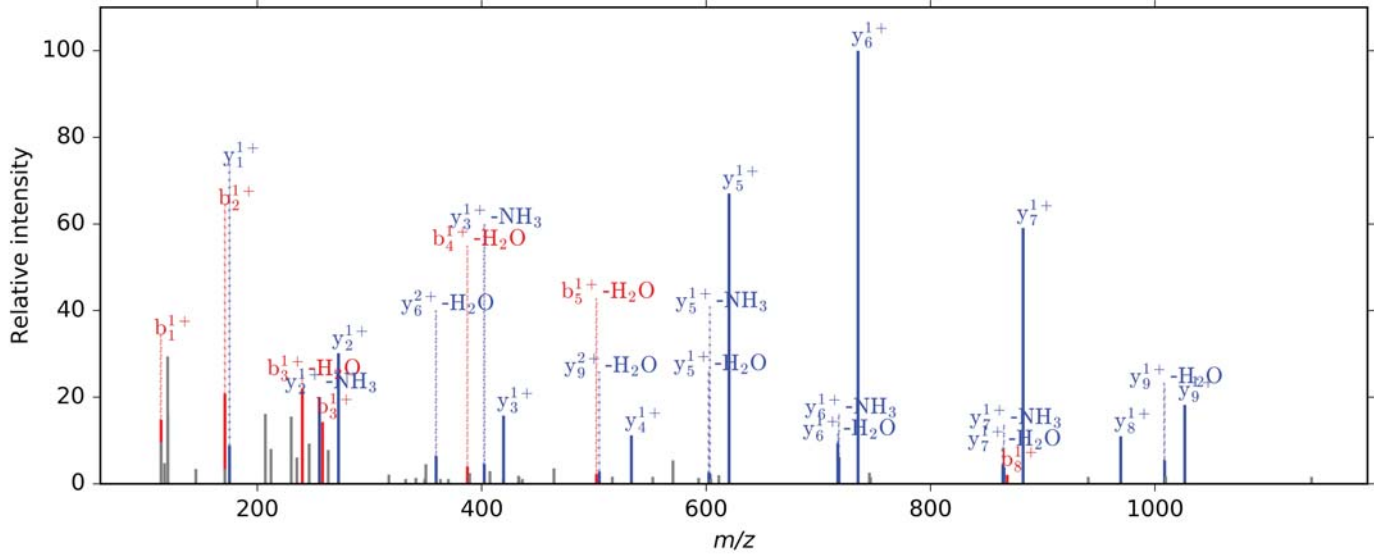

# Ac-ASASAAASTLSEPPR

Peptide identified from sample

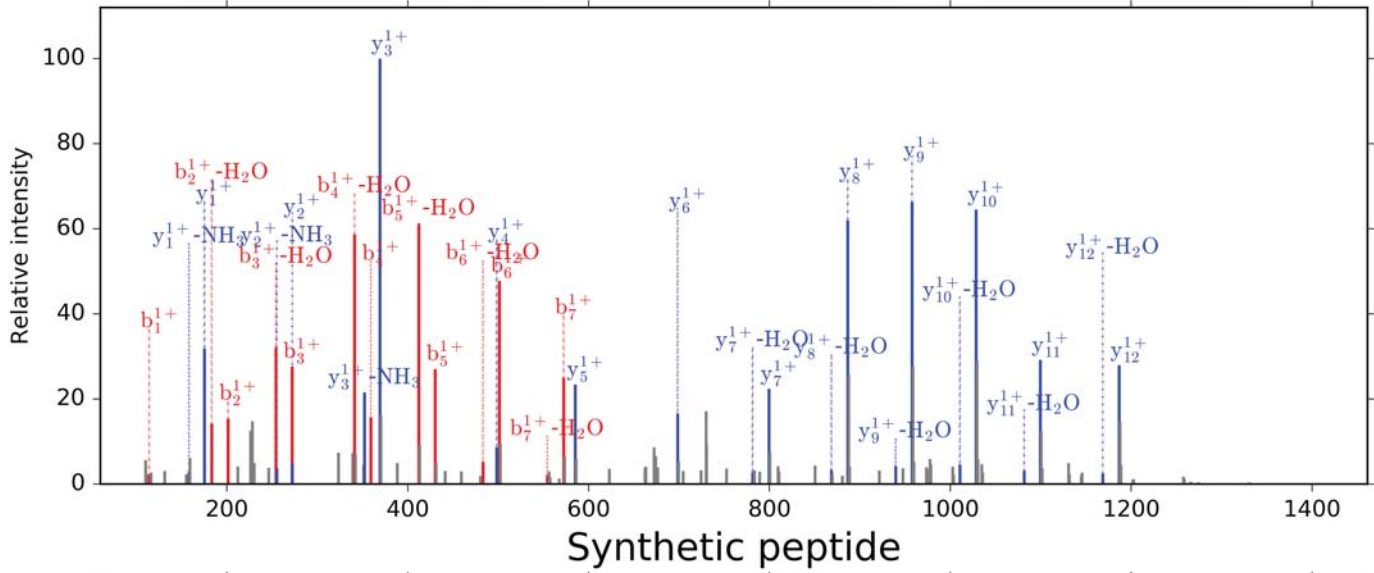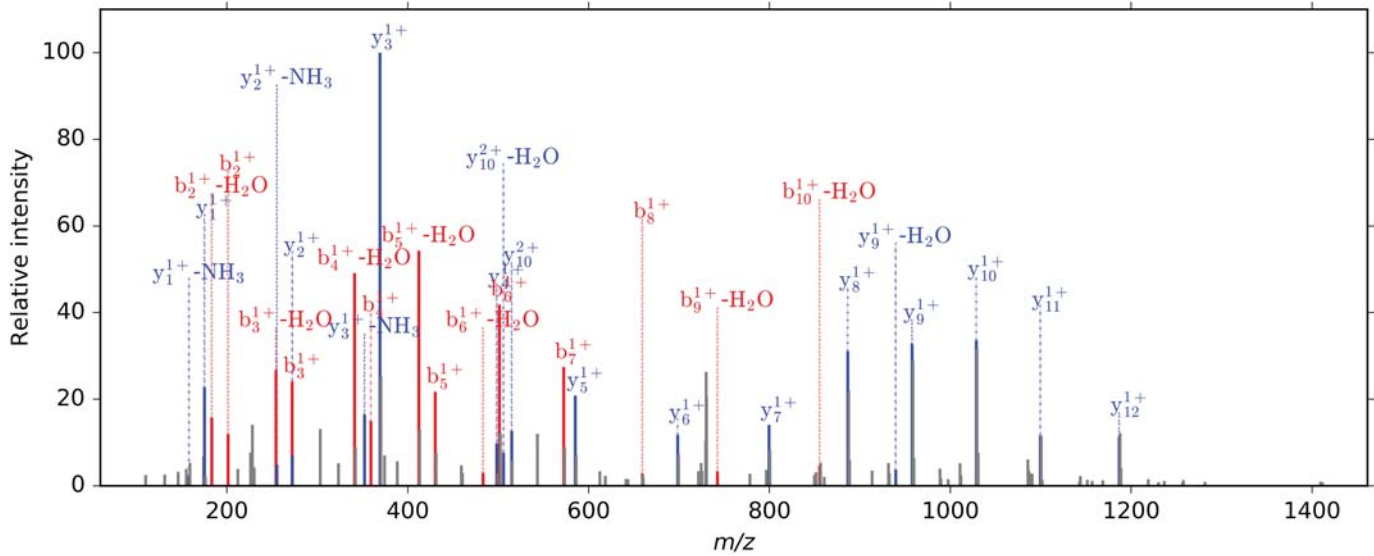



# Ac-ASLSAAAAHAQR

## Peptide identified from sample

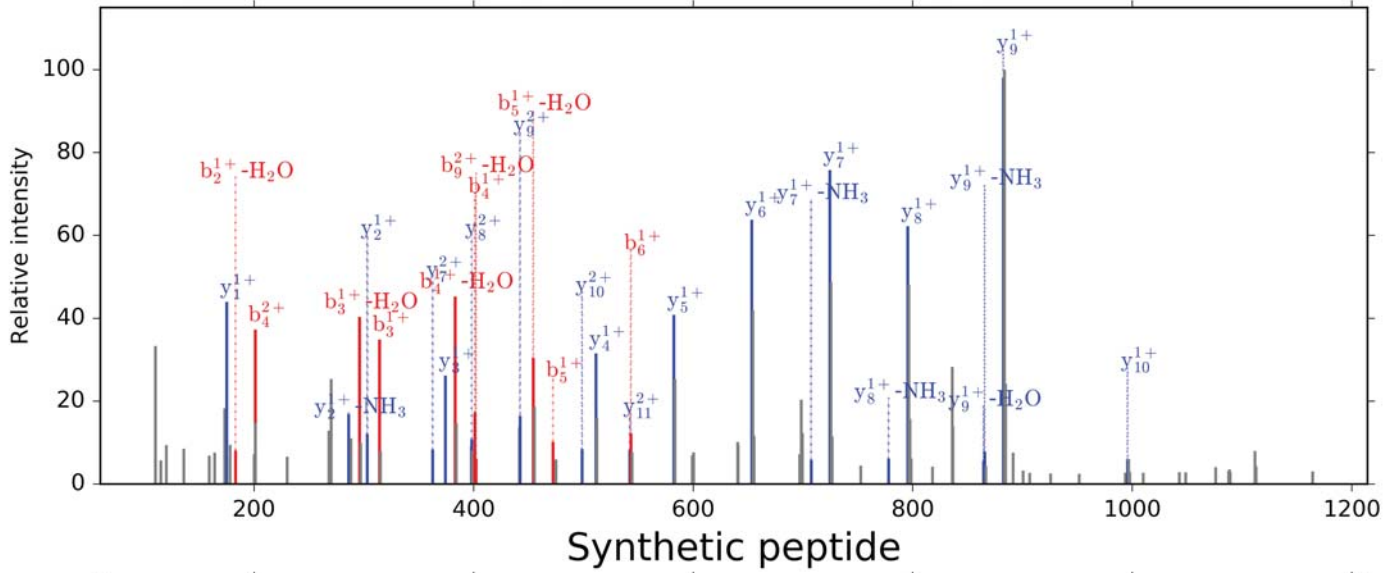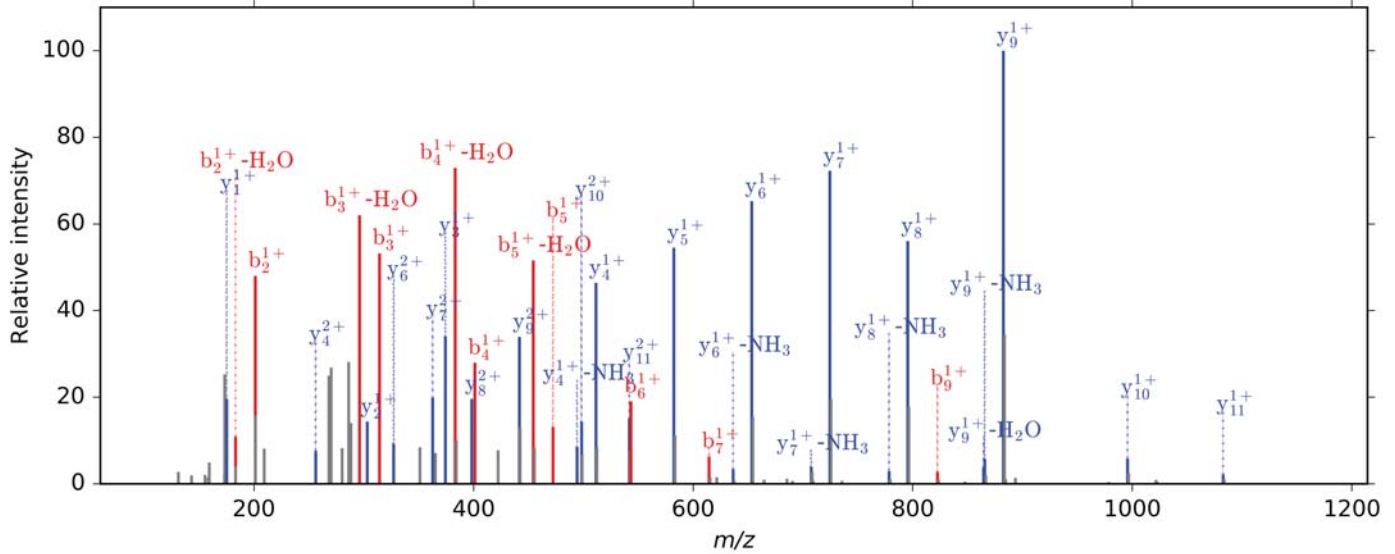

# Ac-ASVLQSVSLEVTR

## Peptide identified from sample

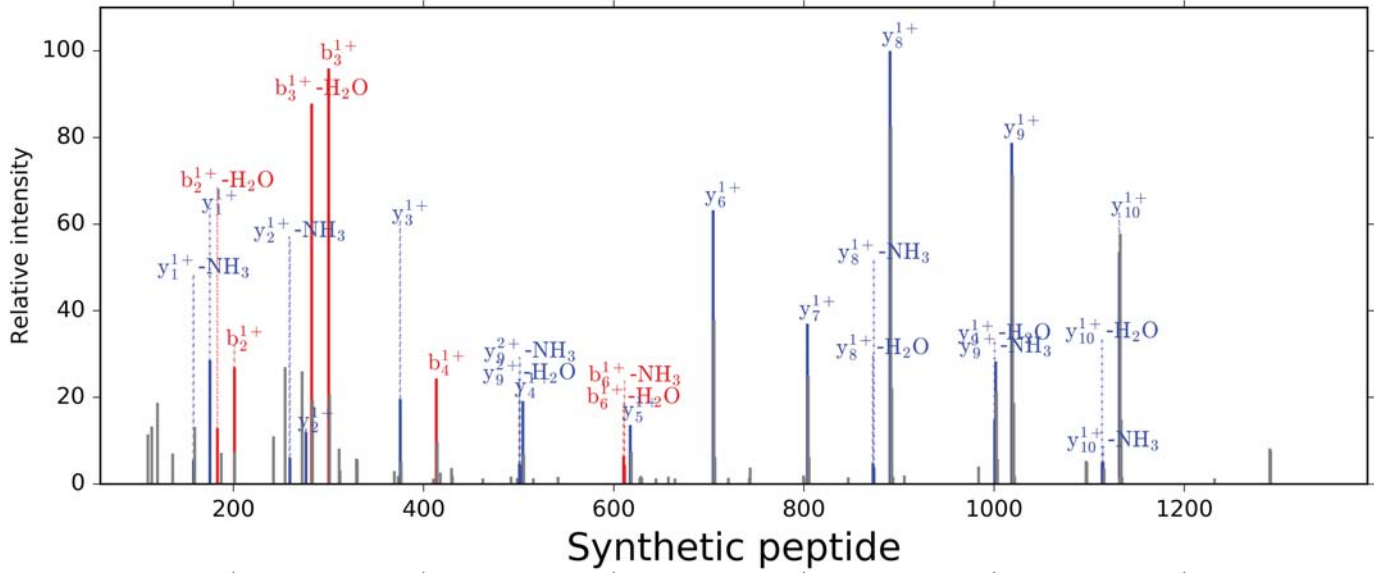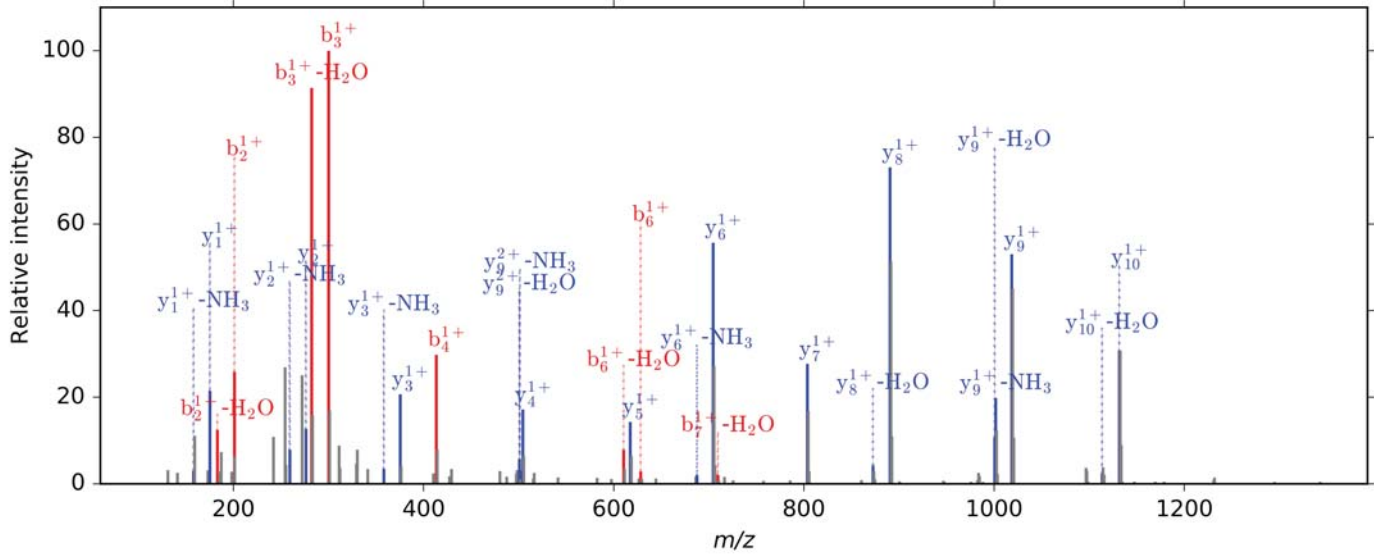

# Ac-ATAAGLSAGLTR

## Peptide identified from sample

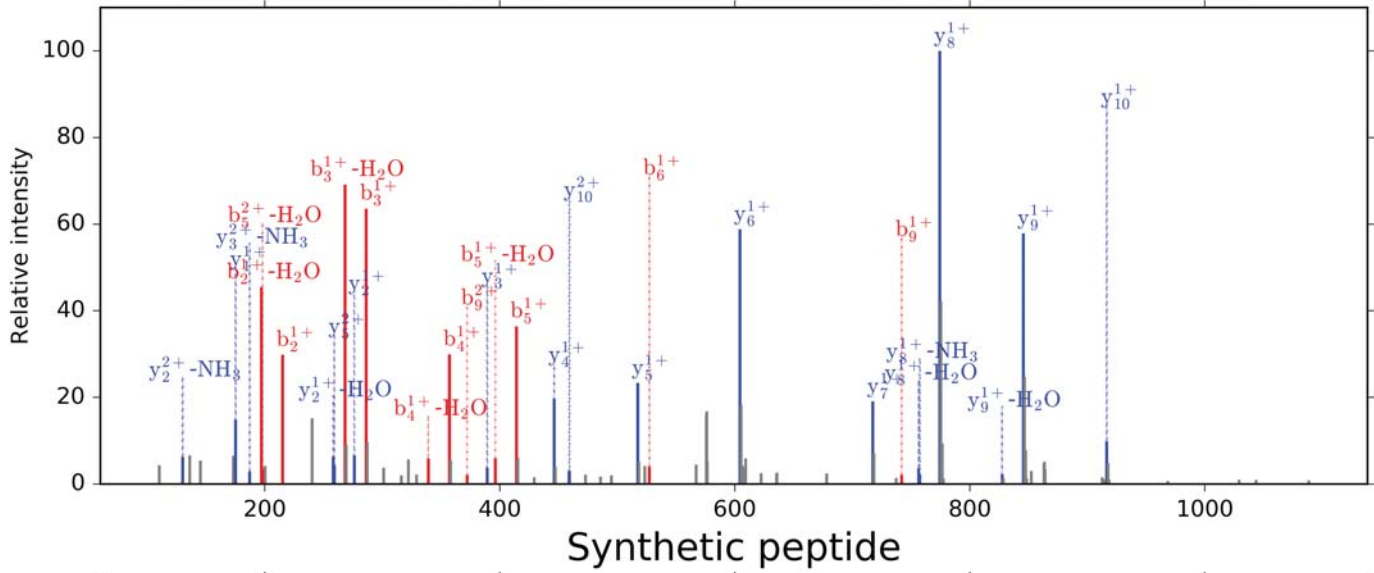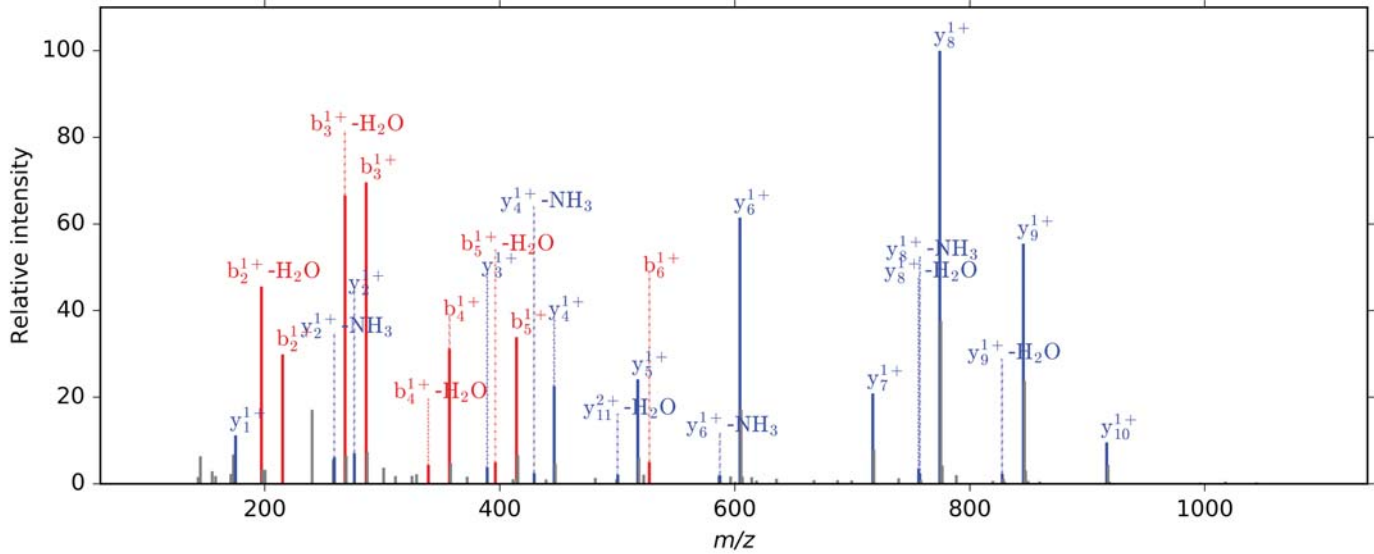



# Ac-ATAAGLSGAR

## Peptide identified from sample

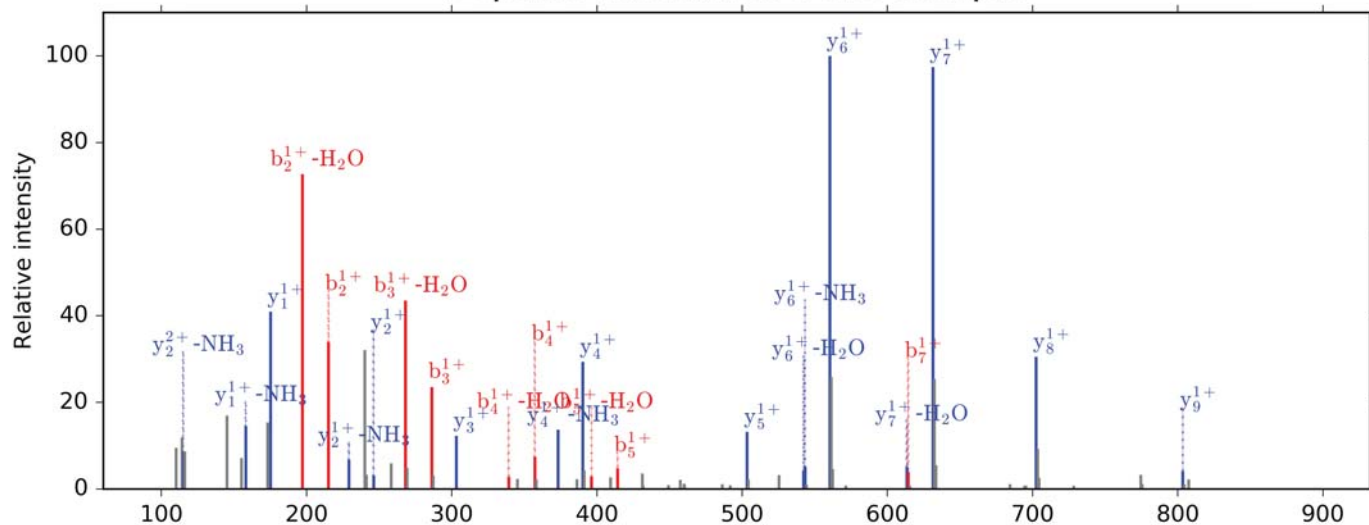

## Synthetic peptide

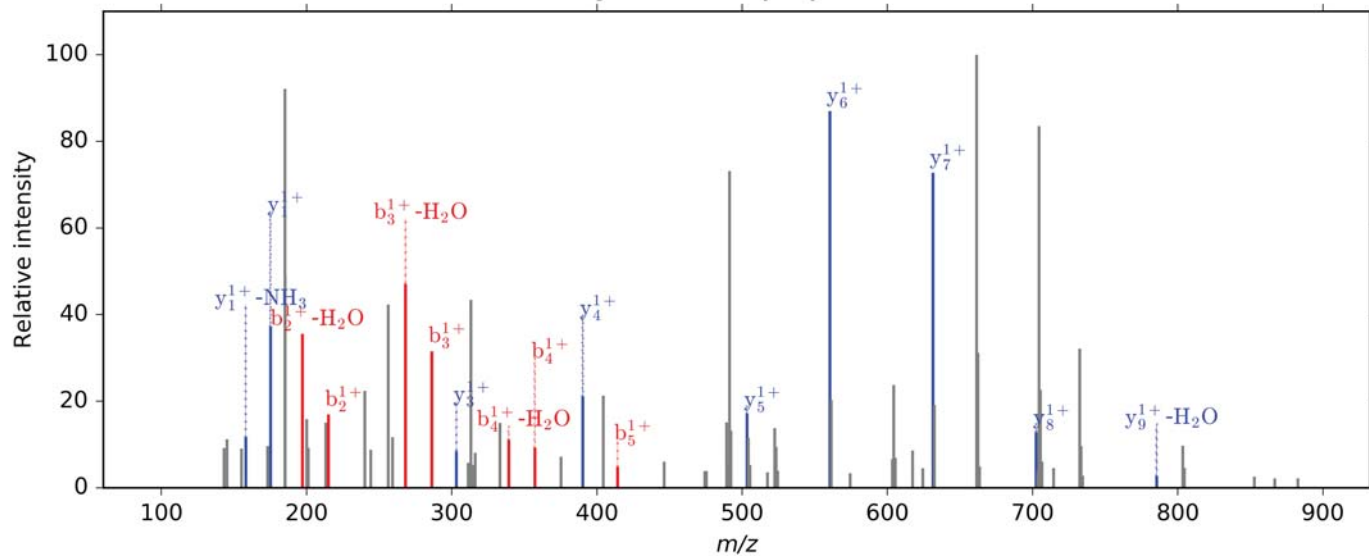

# Ac-AVATATGAGGAAGQR

Peptide identified from sample

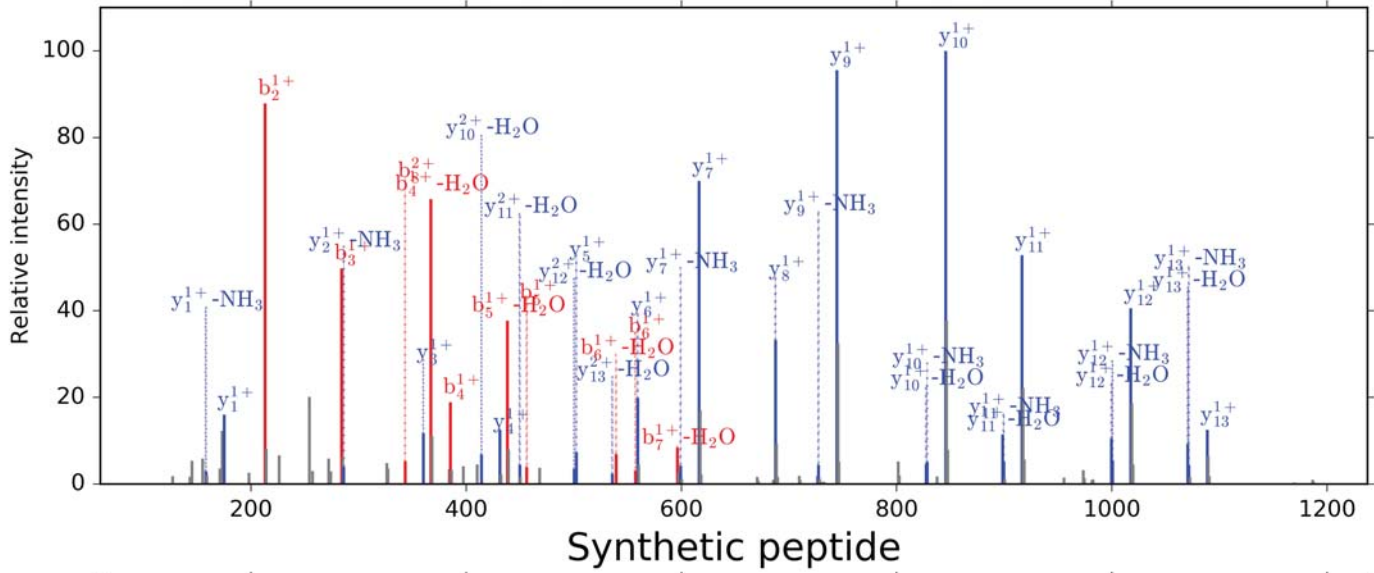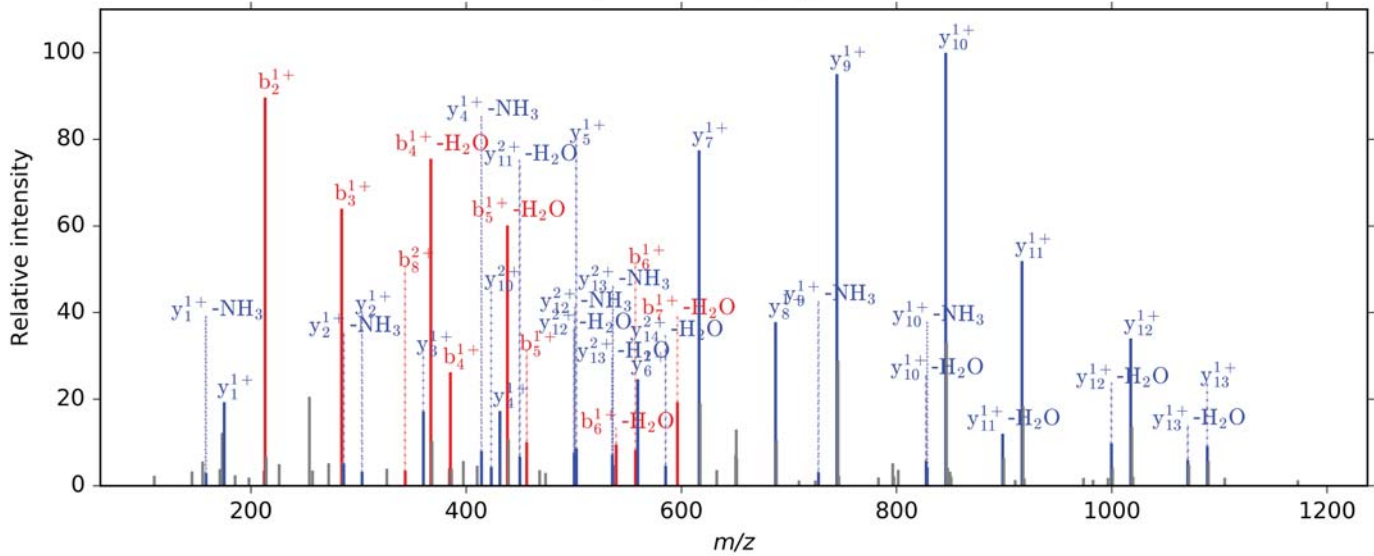

# Ac-GMDVSGQETDWR

## Peptide identified from sample

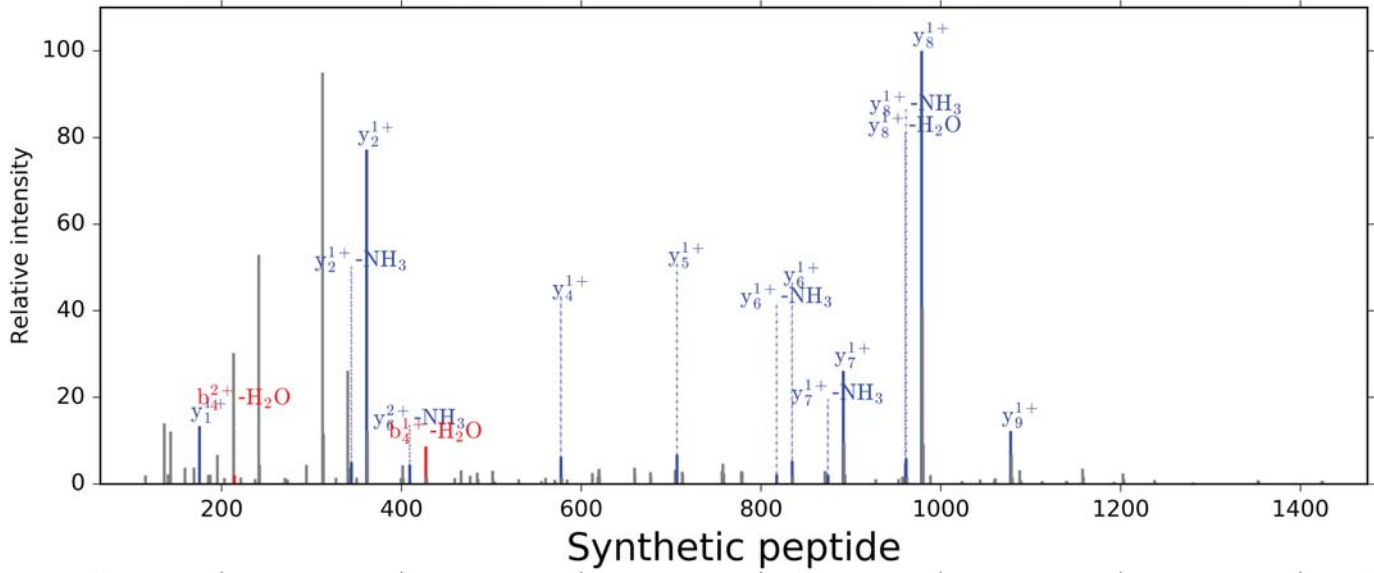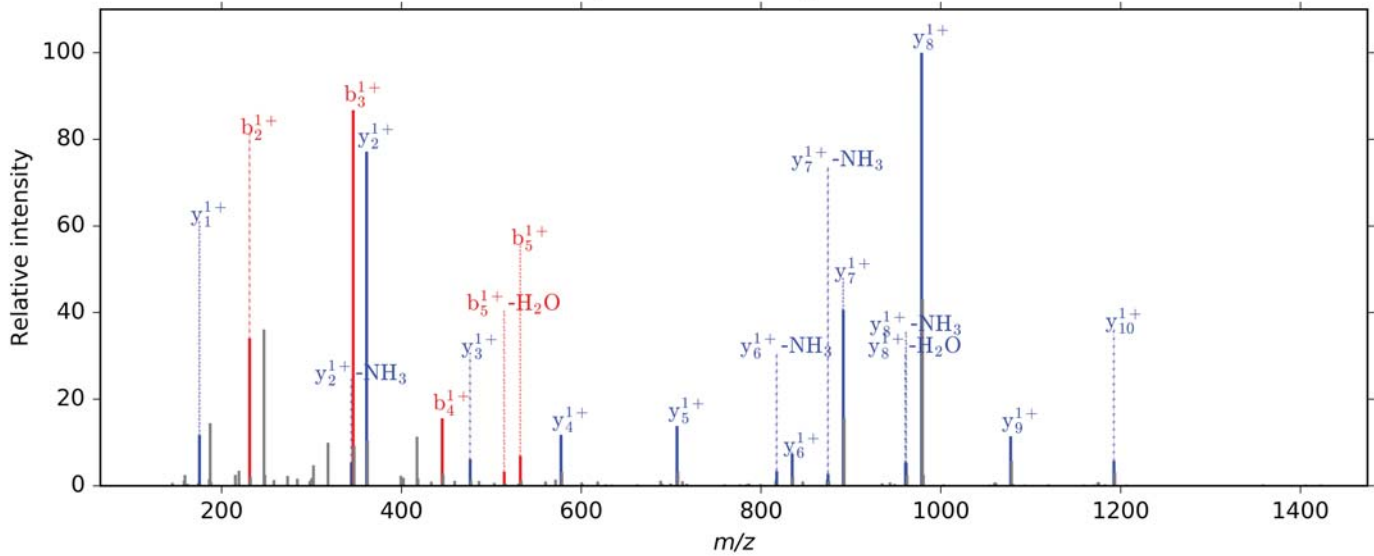



# Ac-AAAAAAAAAAGAGAGR

Peptide identified from sample

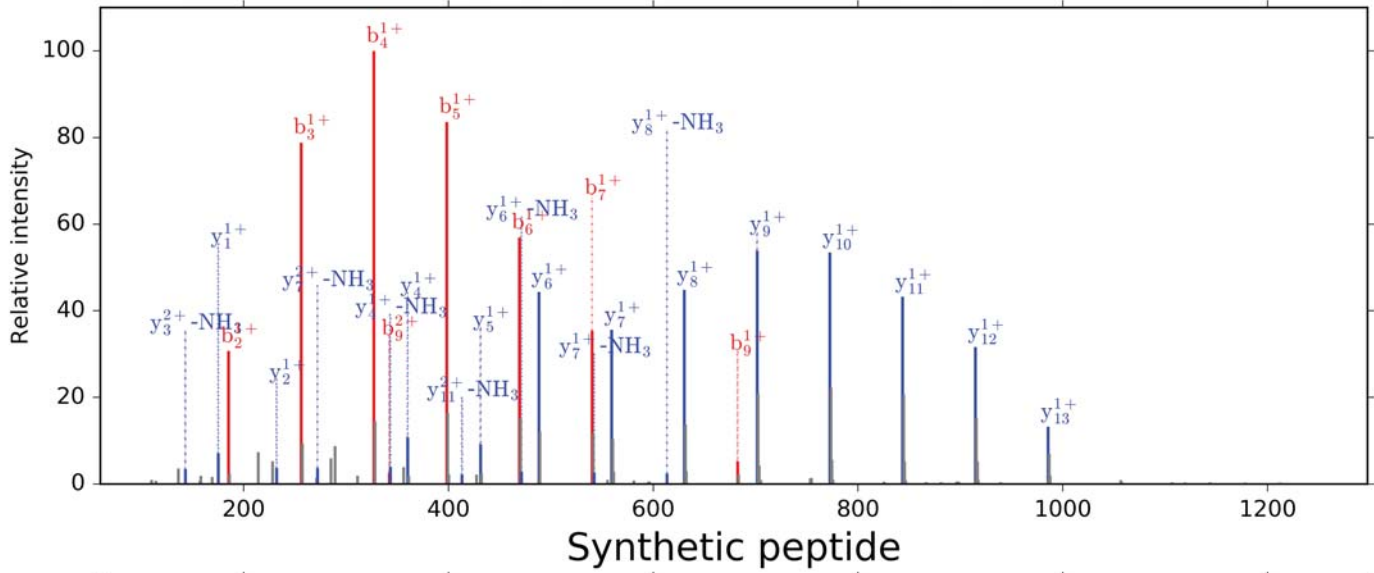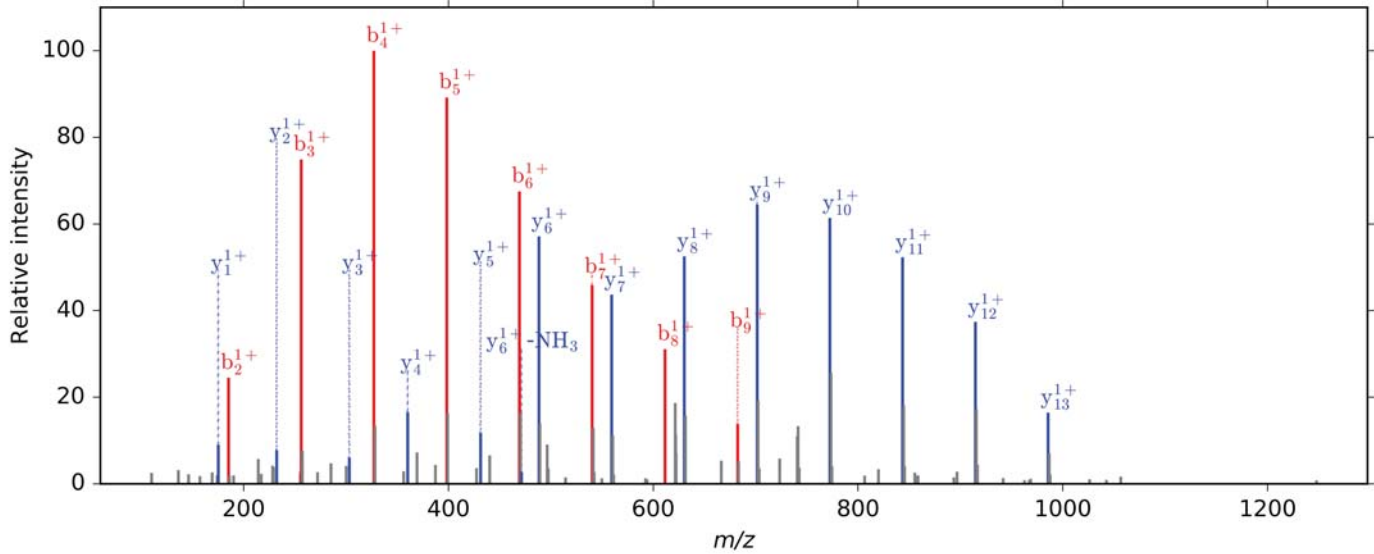



# Ac-AAAEAAAGPGPVR

## Peptide identified from sample

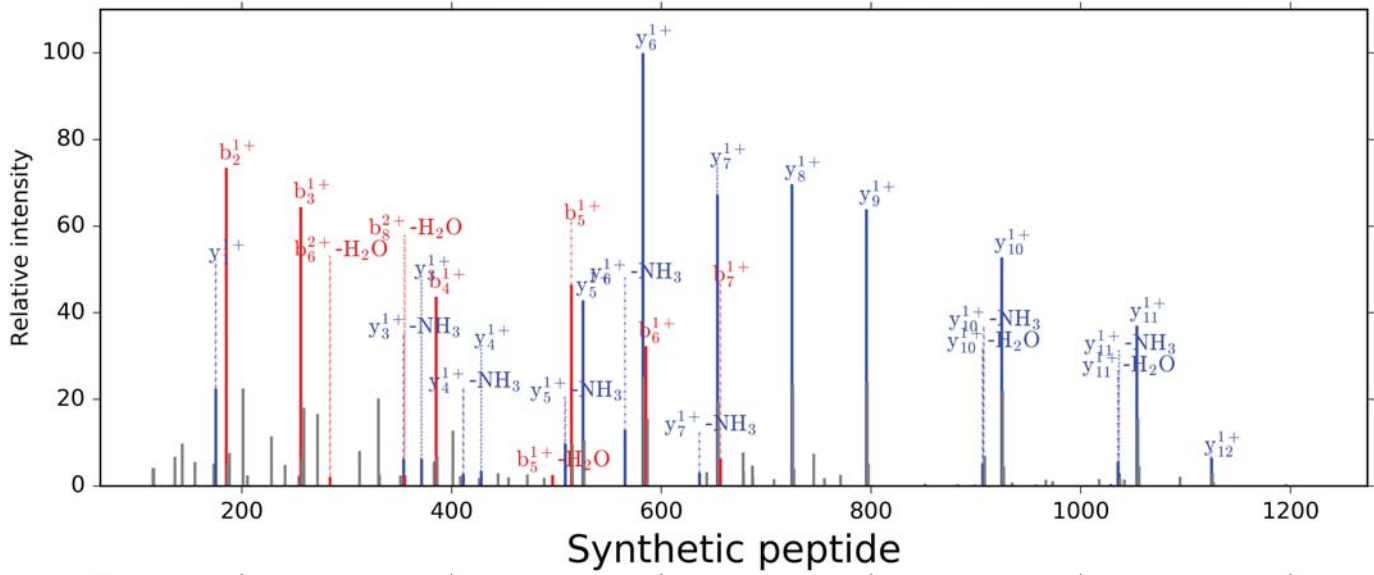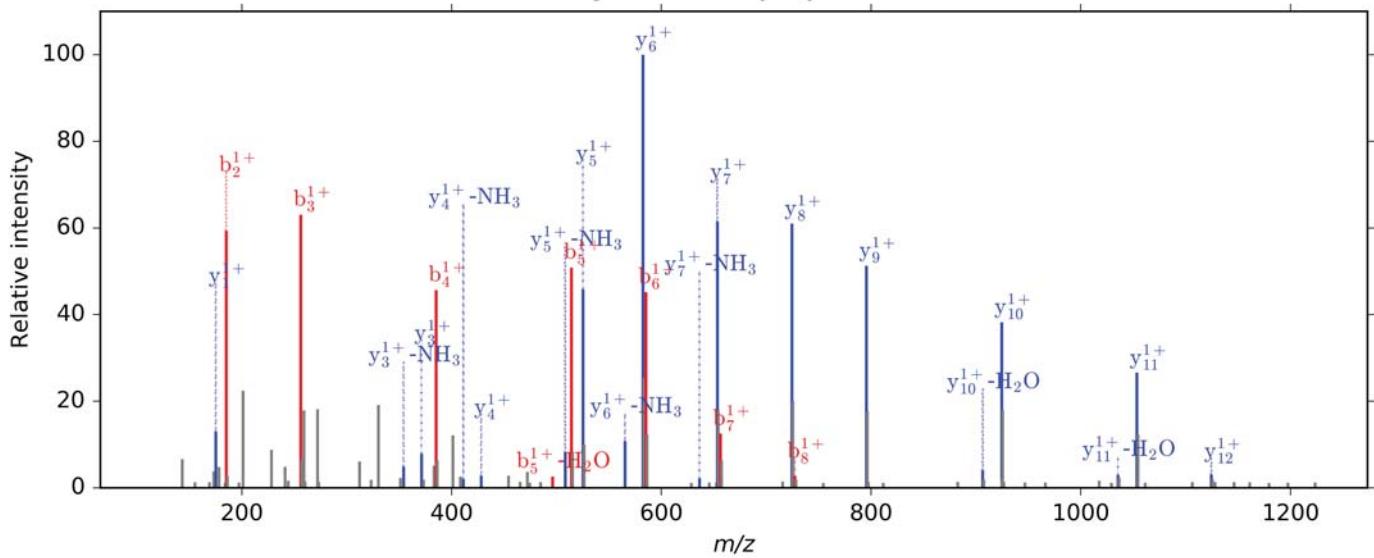

# Ac-MDFLWDKR

## Peptide identified from sample

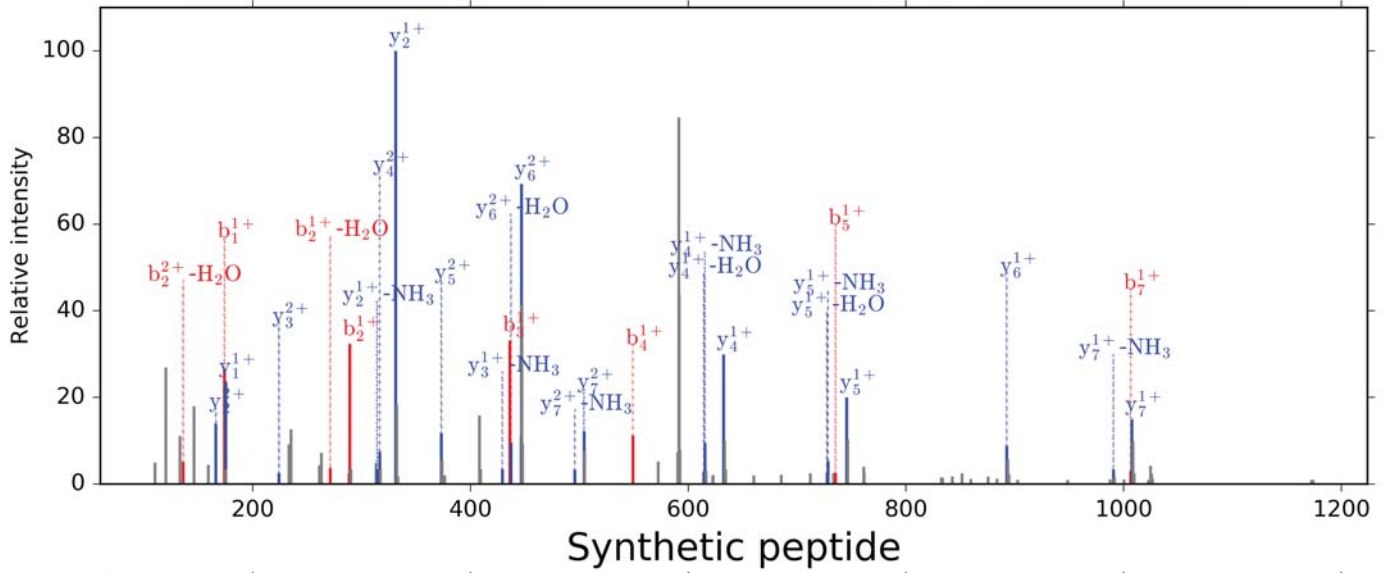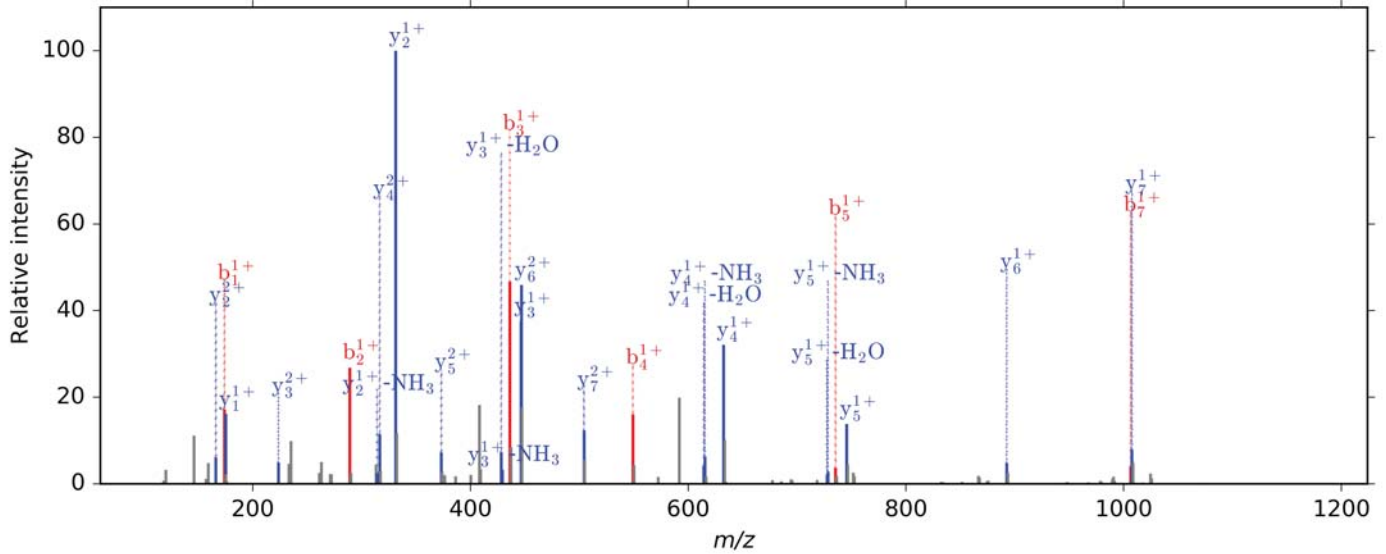

# Ac-MDGPVLLPR

## Peptide identified from sample

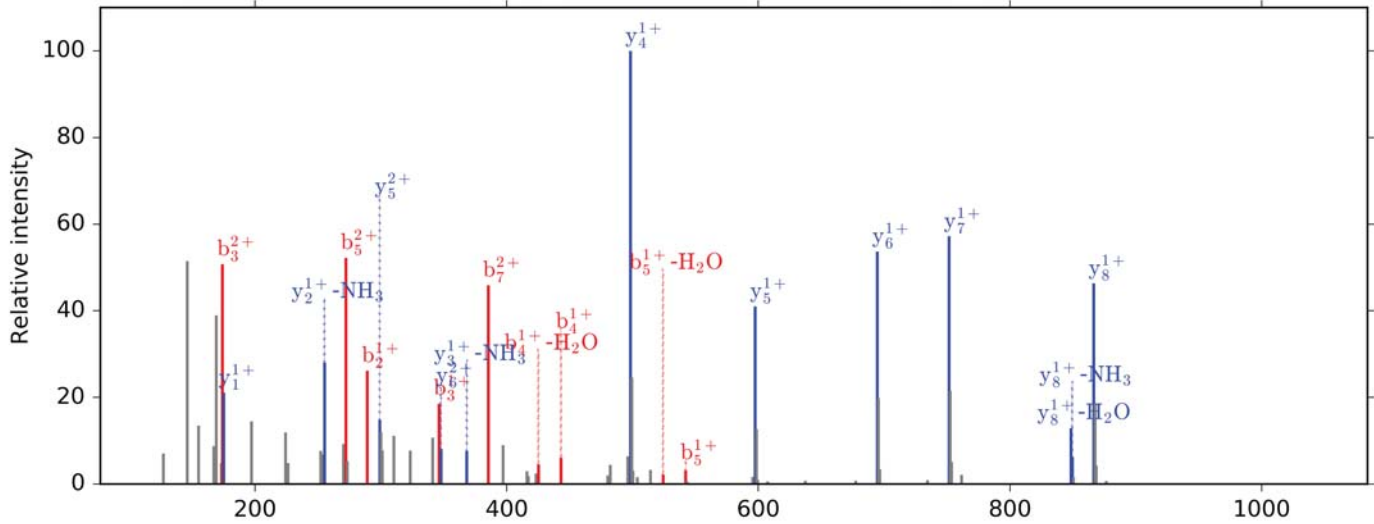

## Synthetic peptide

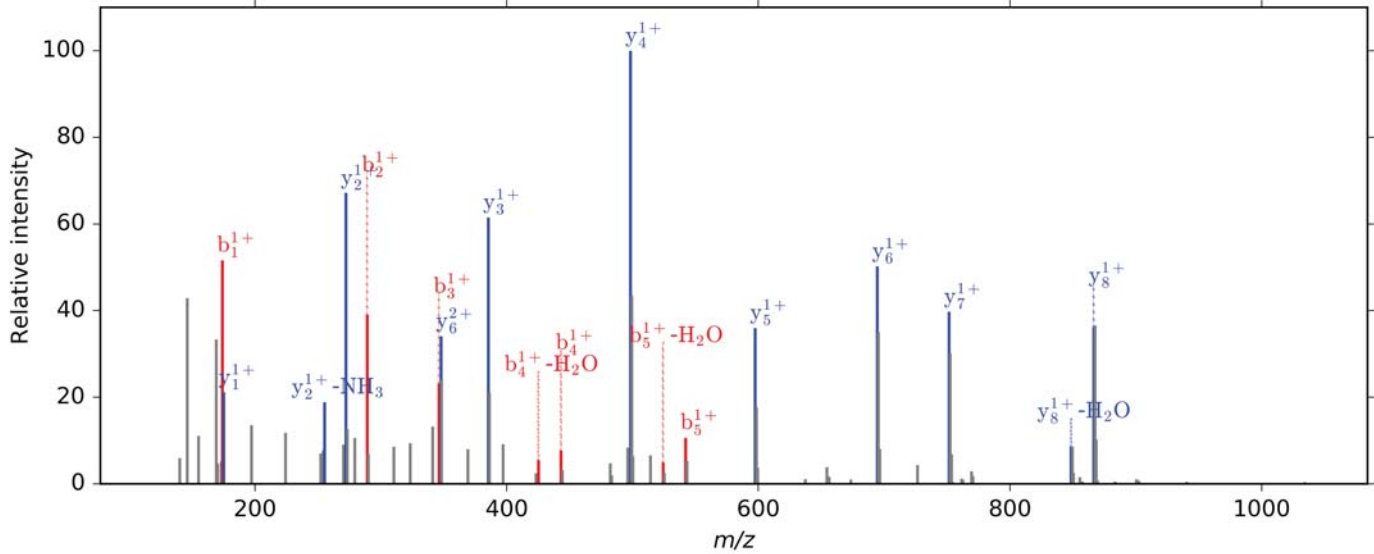

# Ac-MDPFPSVLTAAR

## Peptide identified from sample

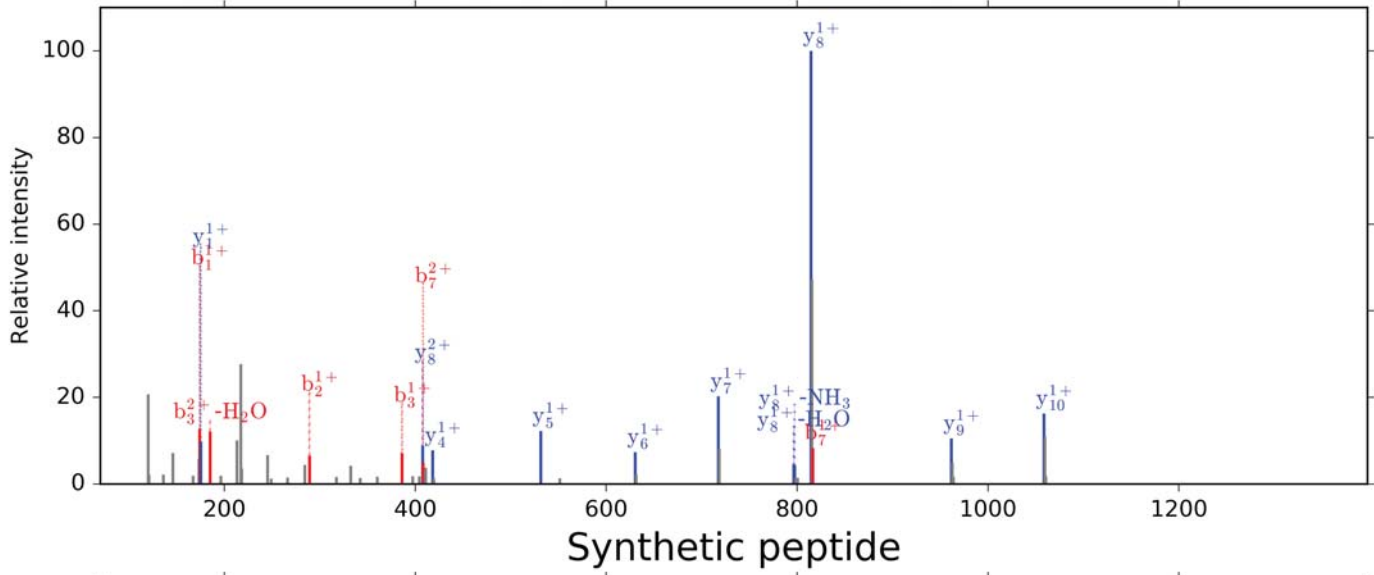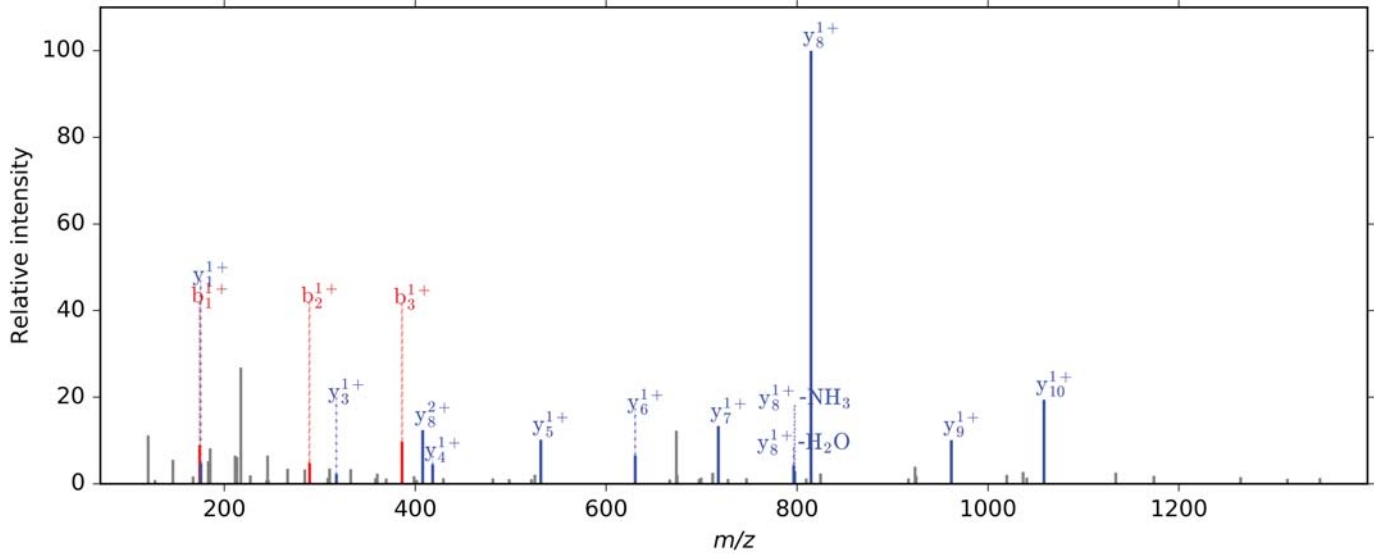

# Ac-MDPPPGEPAAASR

## Peptide identified from sample

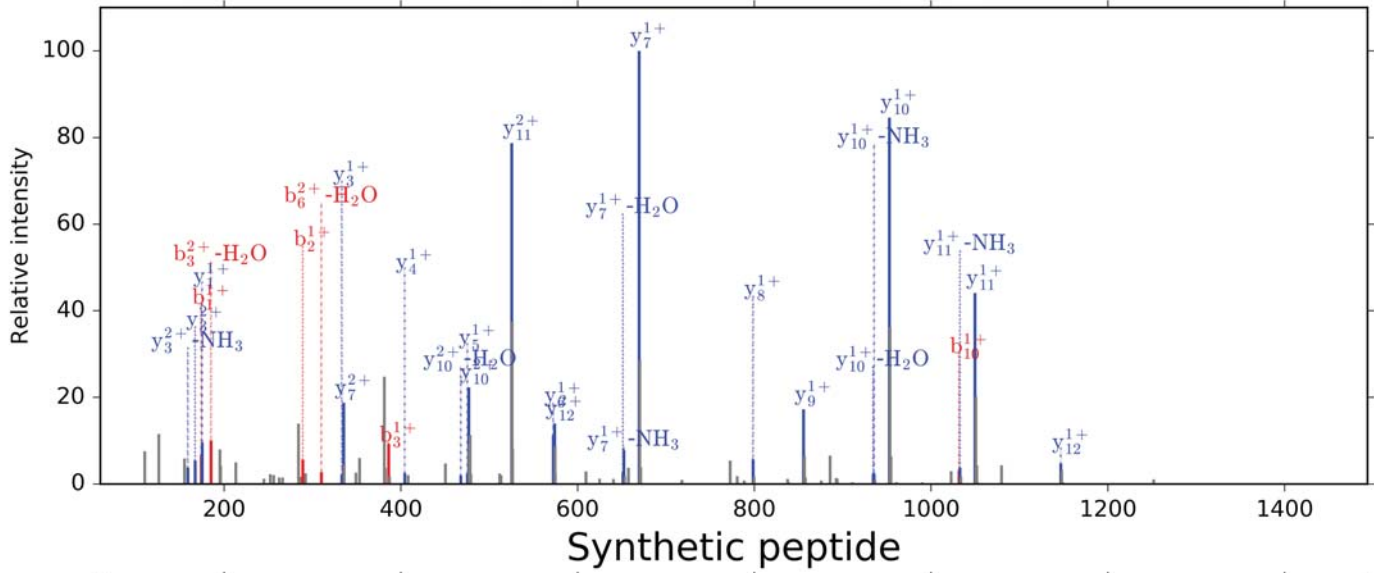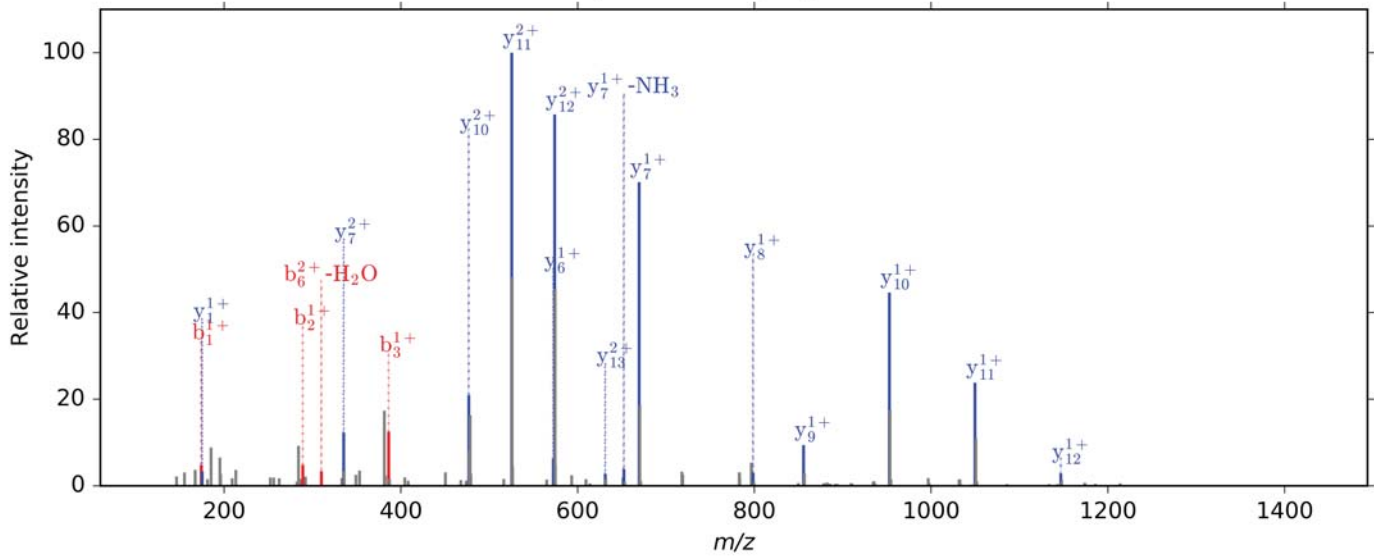

# Ac-AAAGGSLEEELPR

Peptide identified from sample

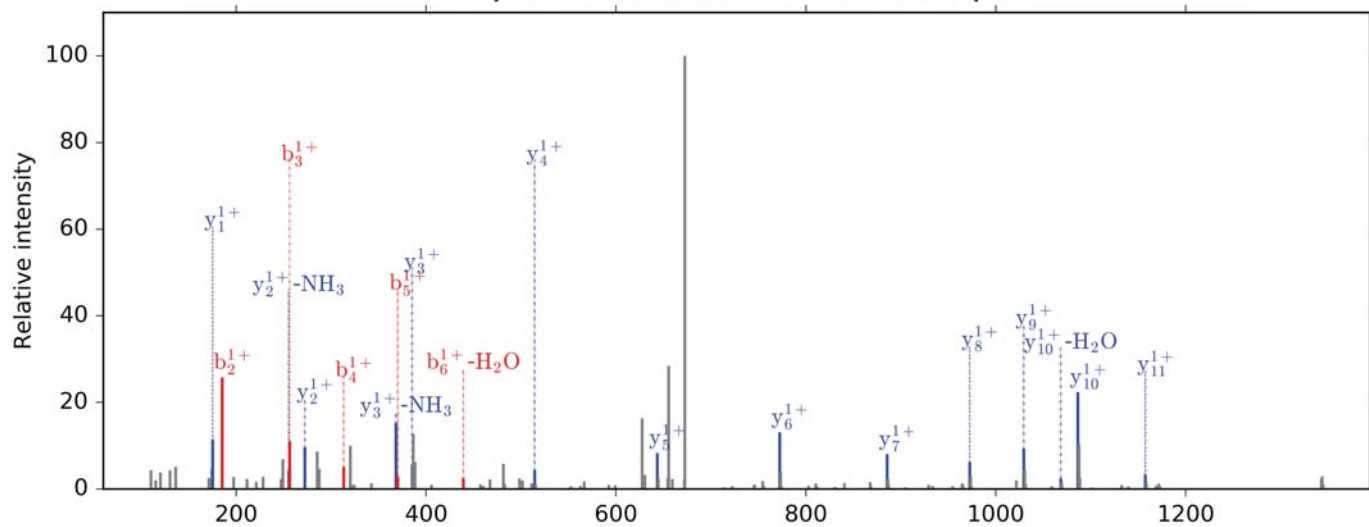

Synthetic peptide

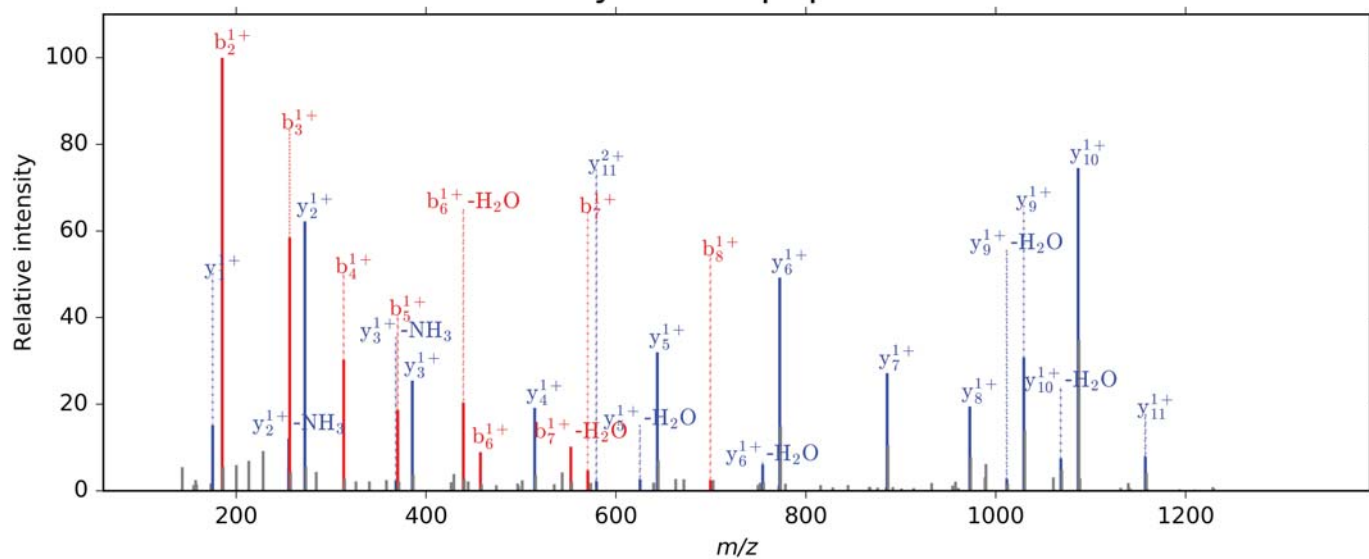

# Ac-MEAGPPLCTAGLTR

## Peptide identified from sample

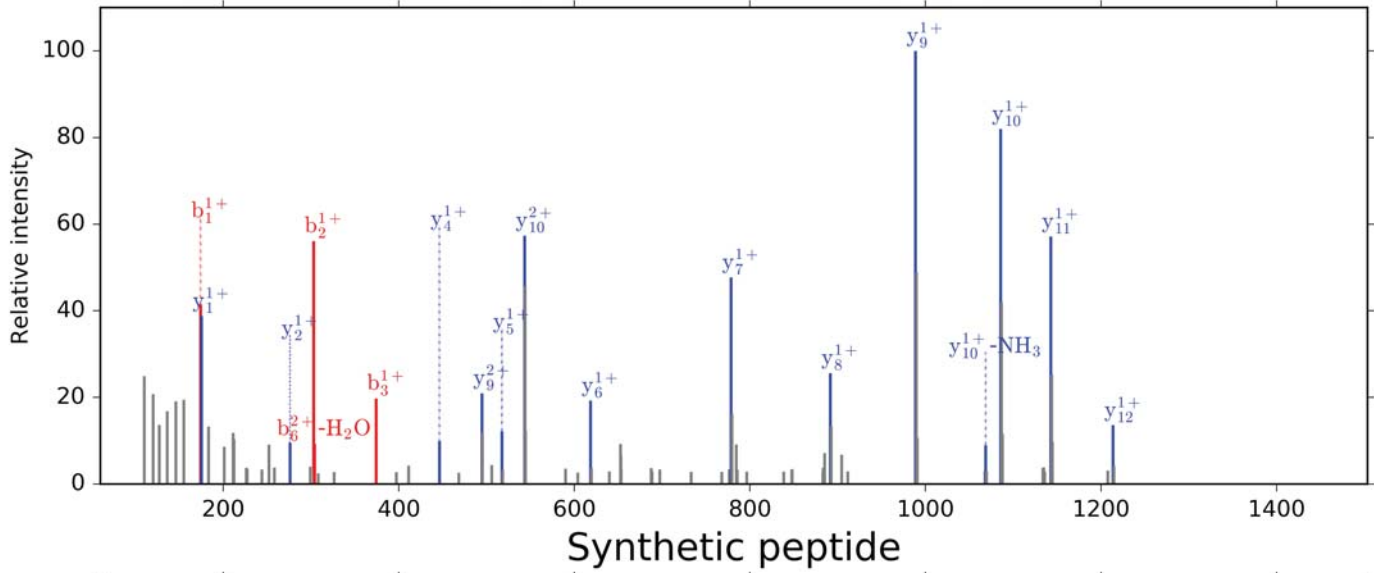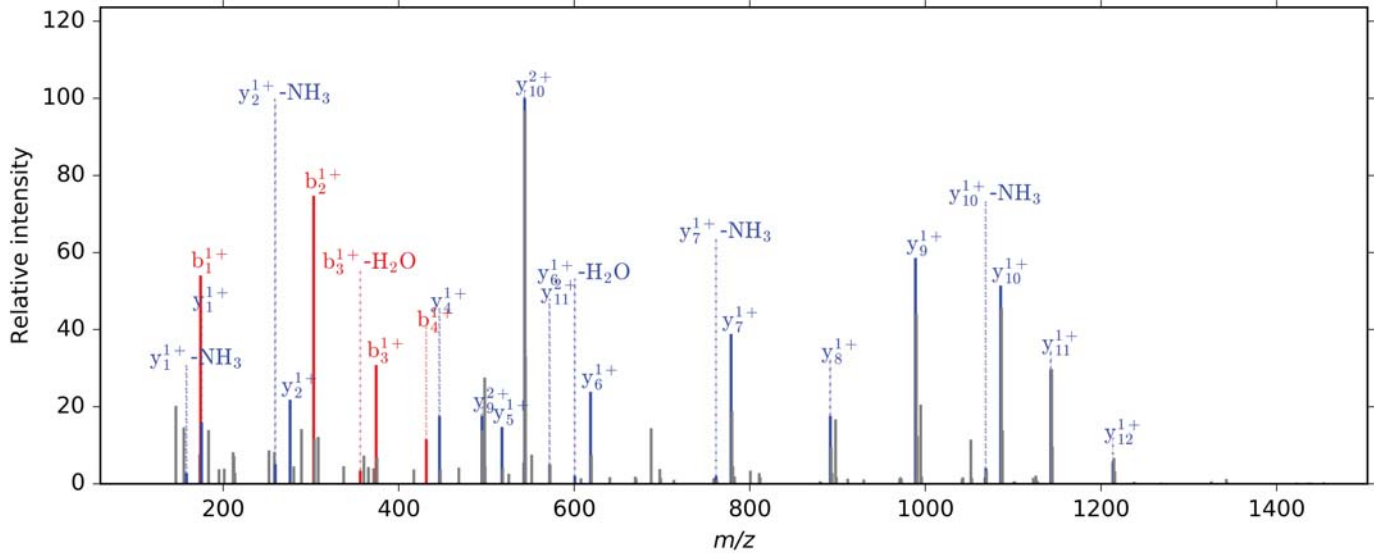





Ac-MEGGGGLREEEAEEAEEEGR

Peptide identified from sample

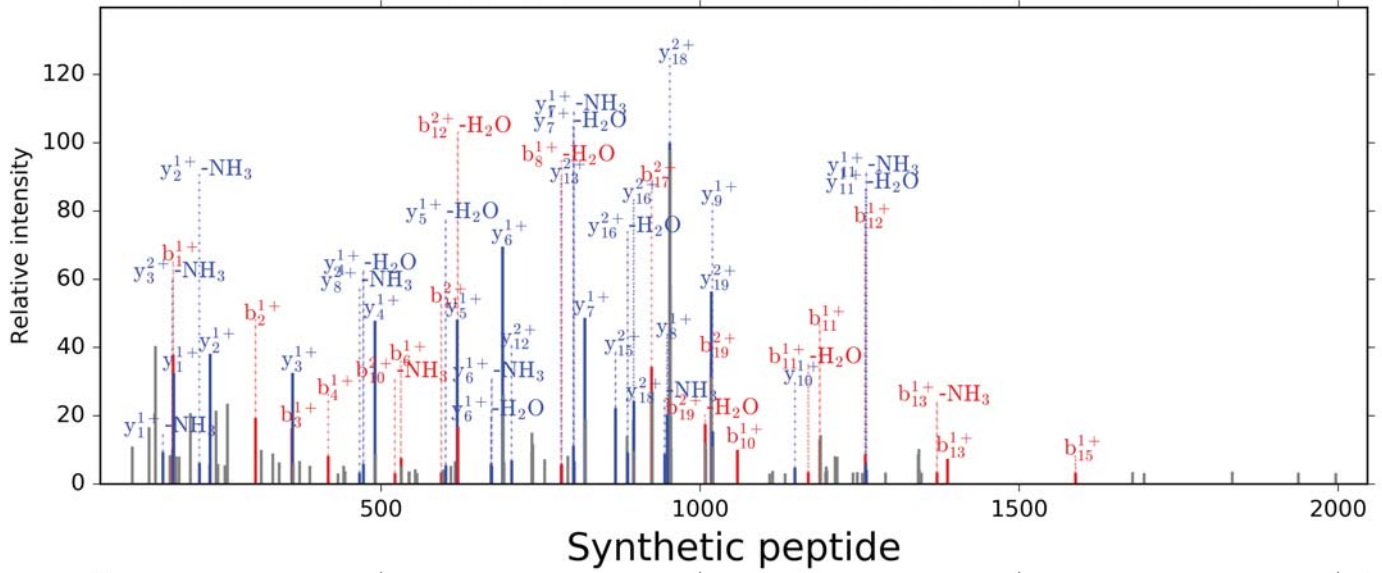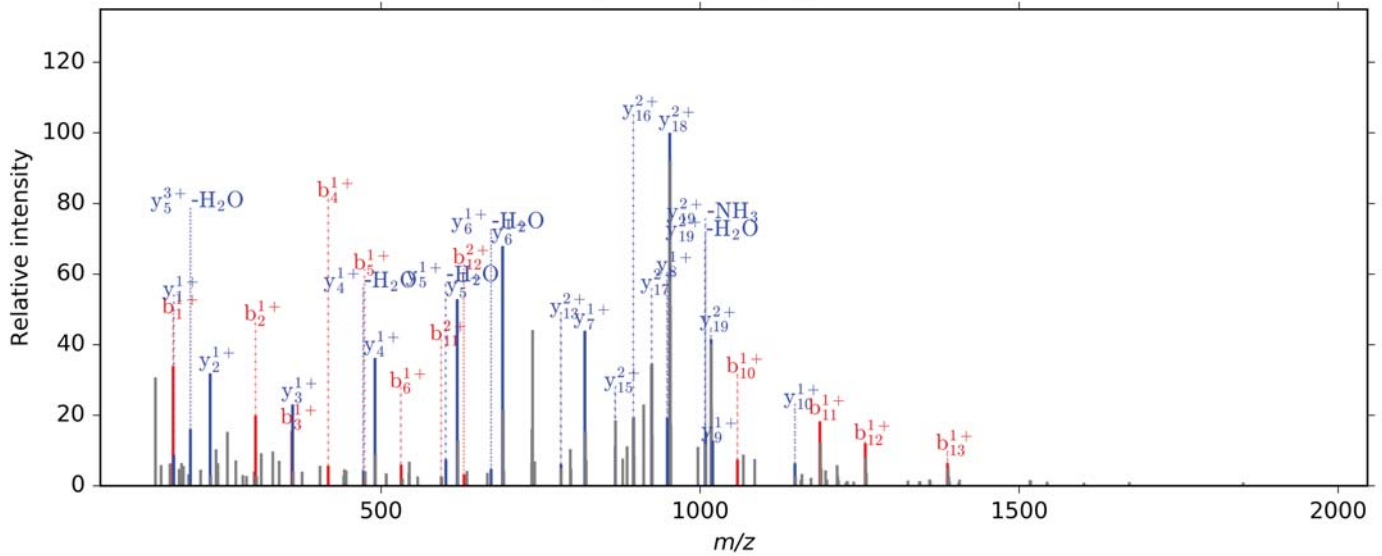

# Ac-MEGTMANCER

## Peptide identified from sample

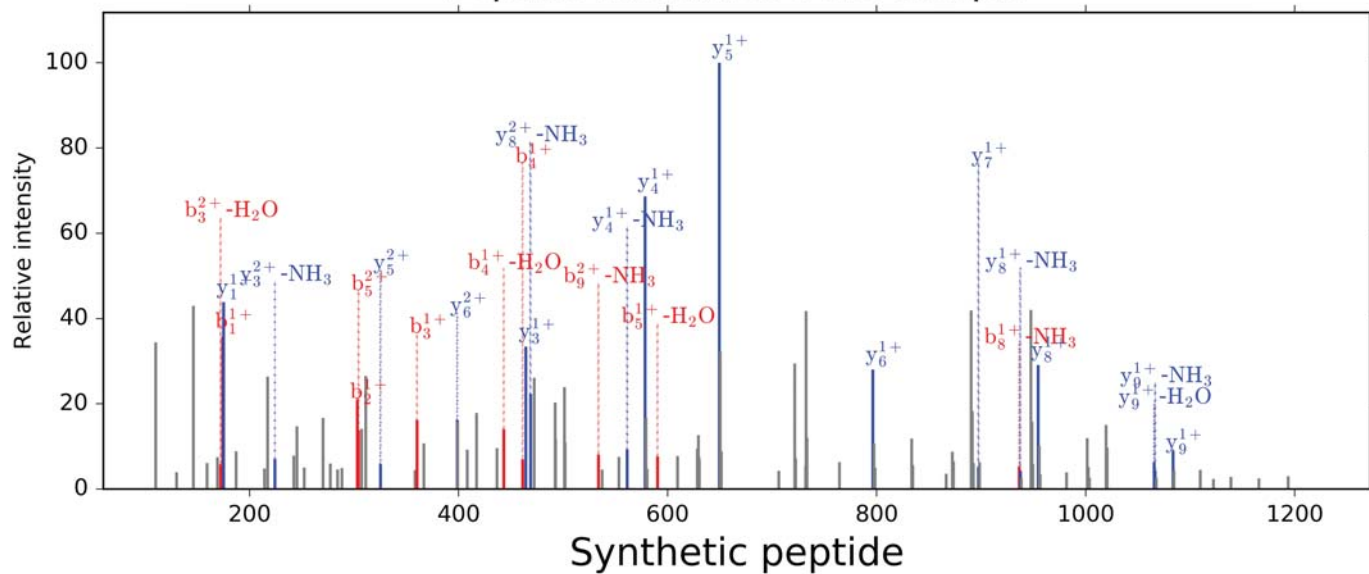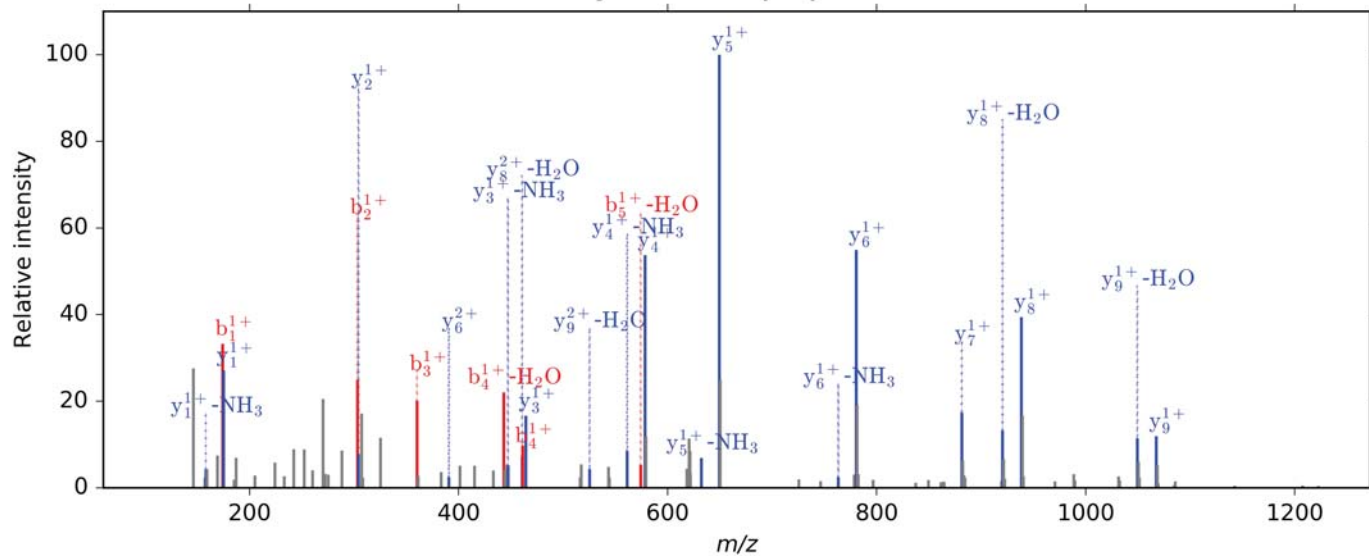

# Ac-AAASSPGSAAAATAALCPPAR

Peptide identified from sample

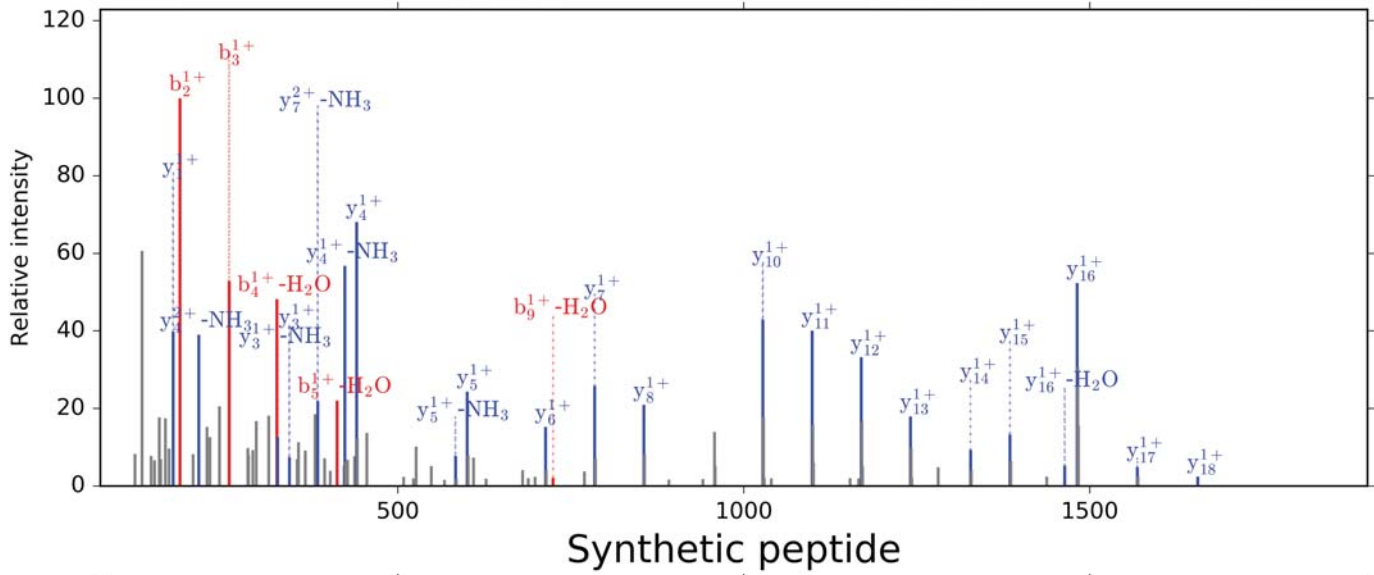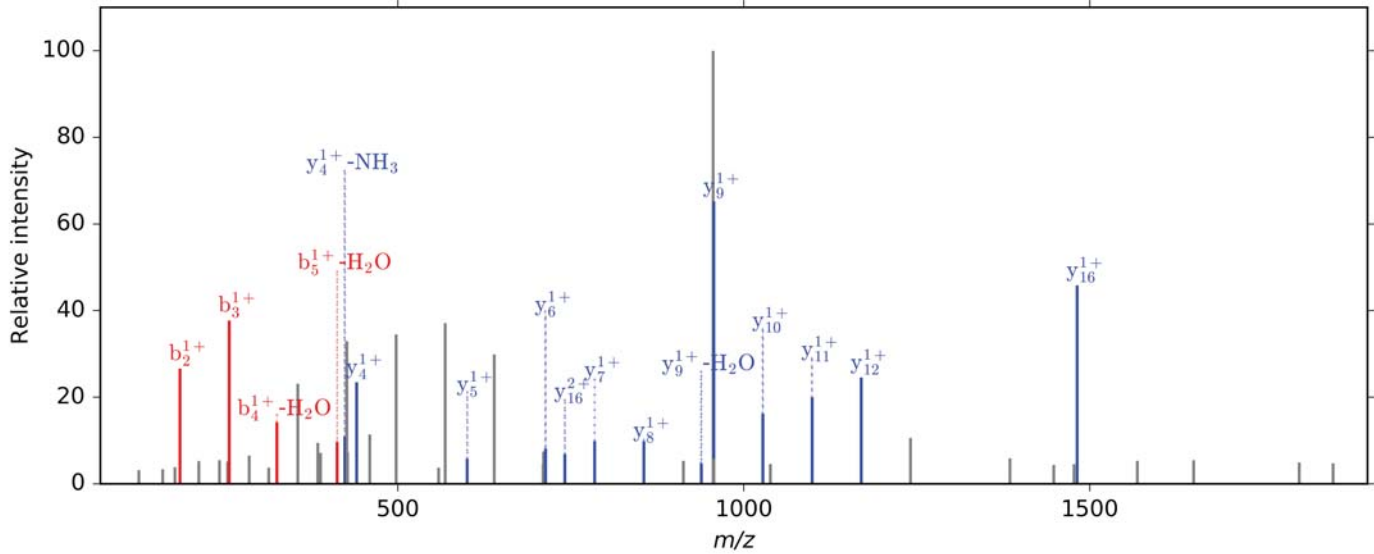

# Ac-MEIPGAPLPAPAMPLNR

## Peptide identified from sample

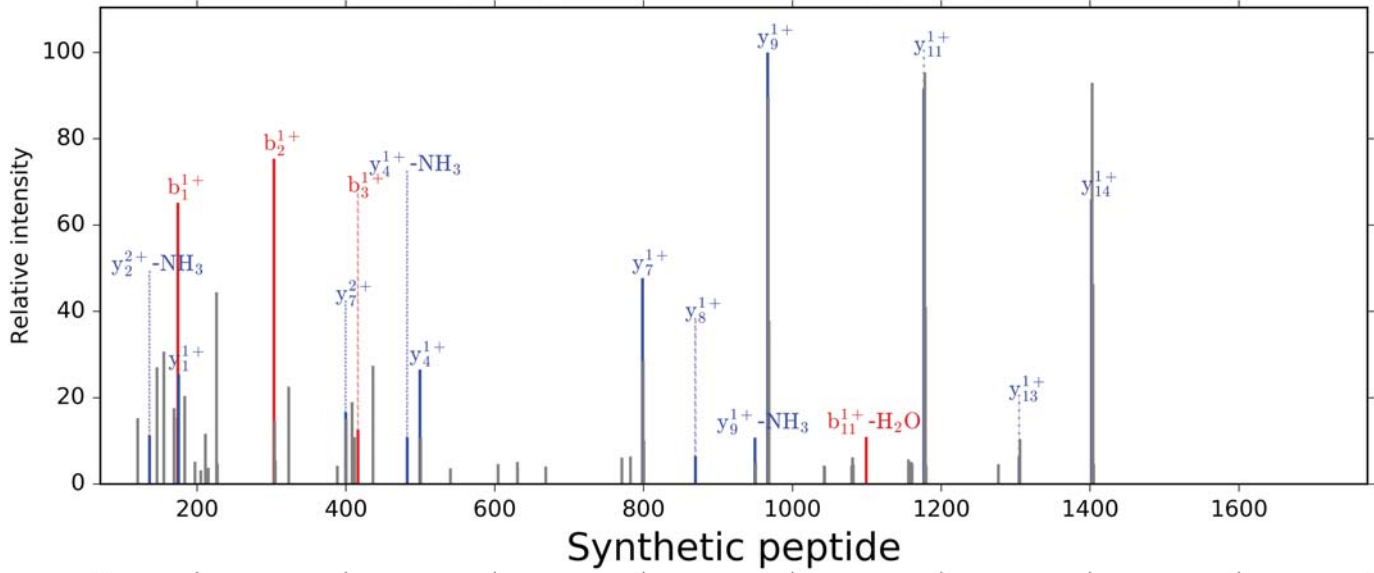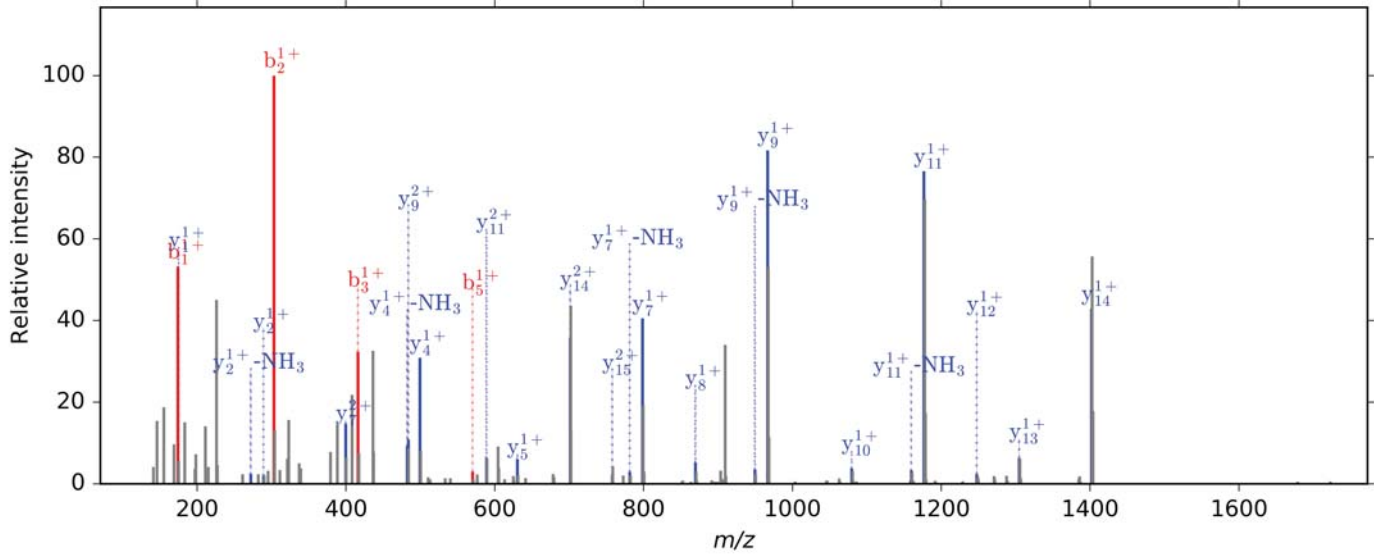

# Ac-MELATSILTR

## Peptide identified from sample

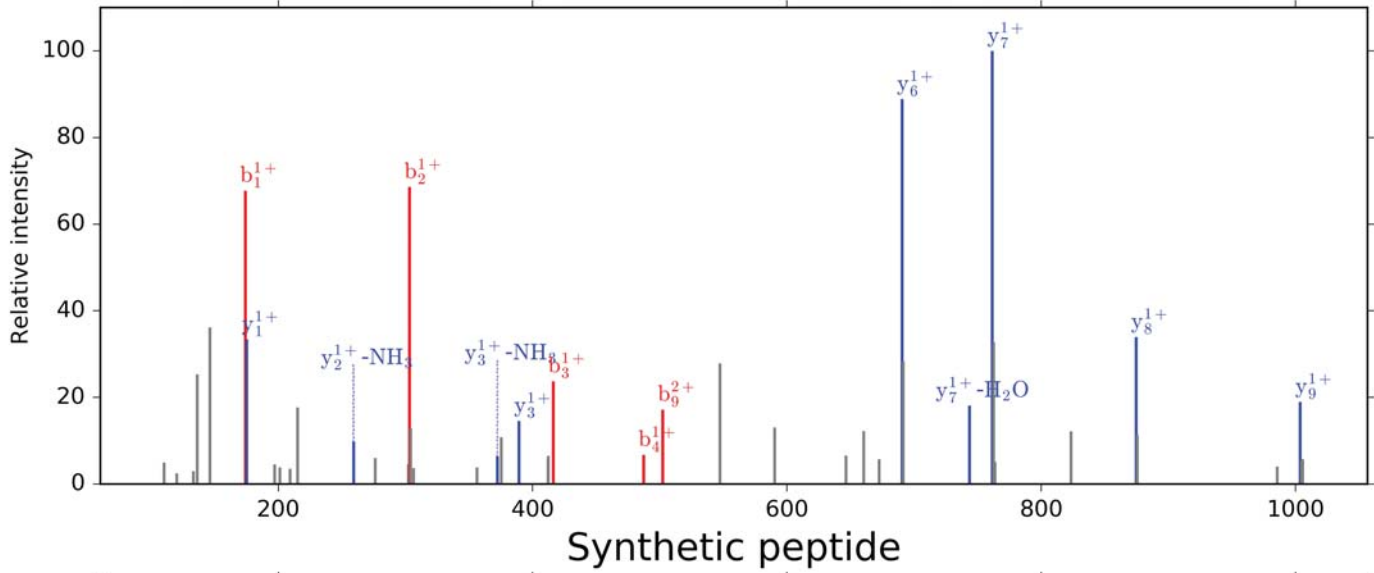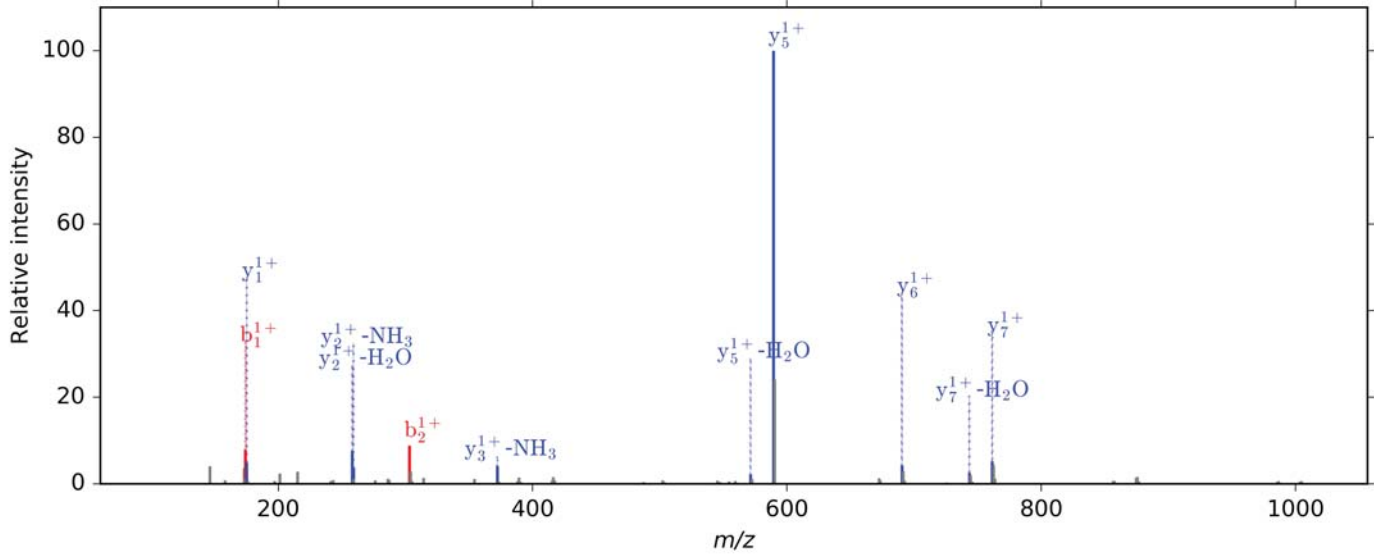

# Ac-MELEVELR

## Peptide identified from sample

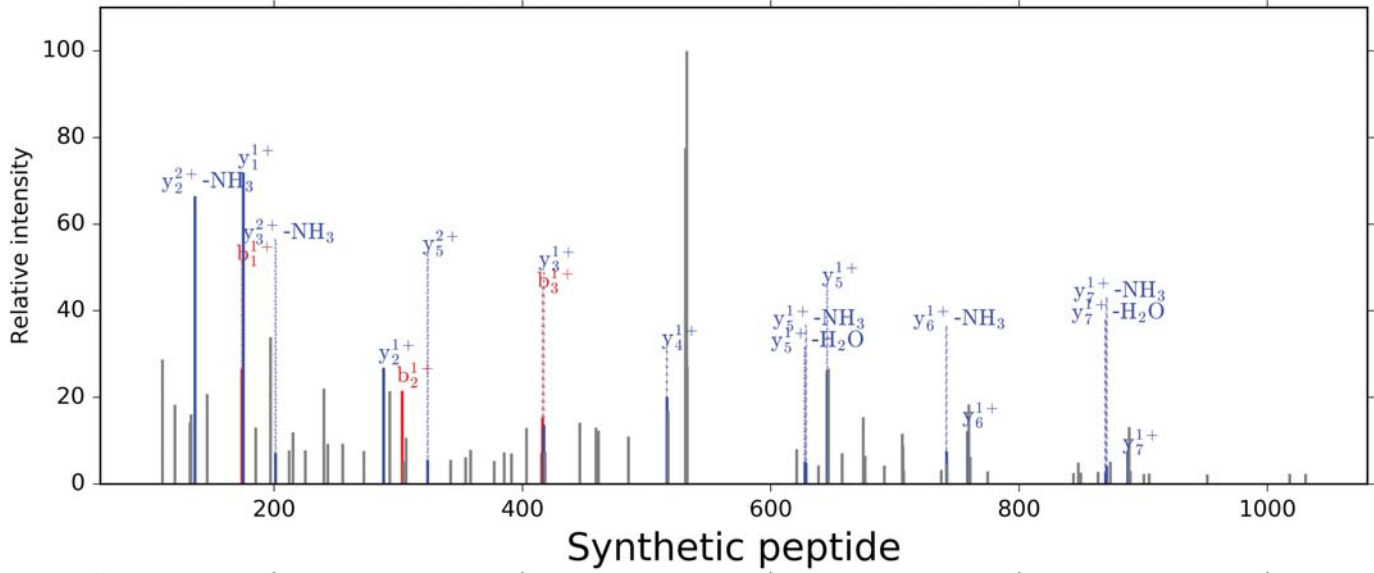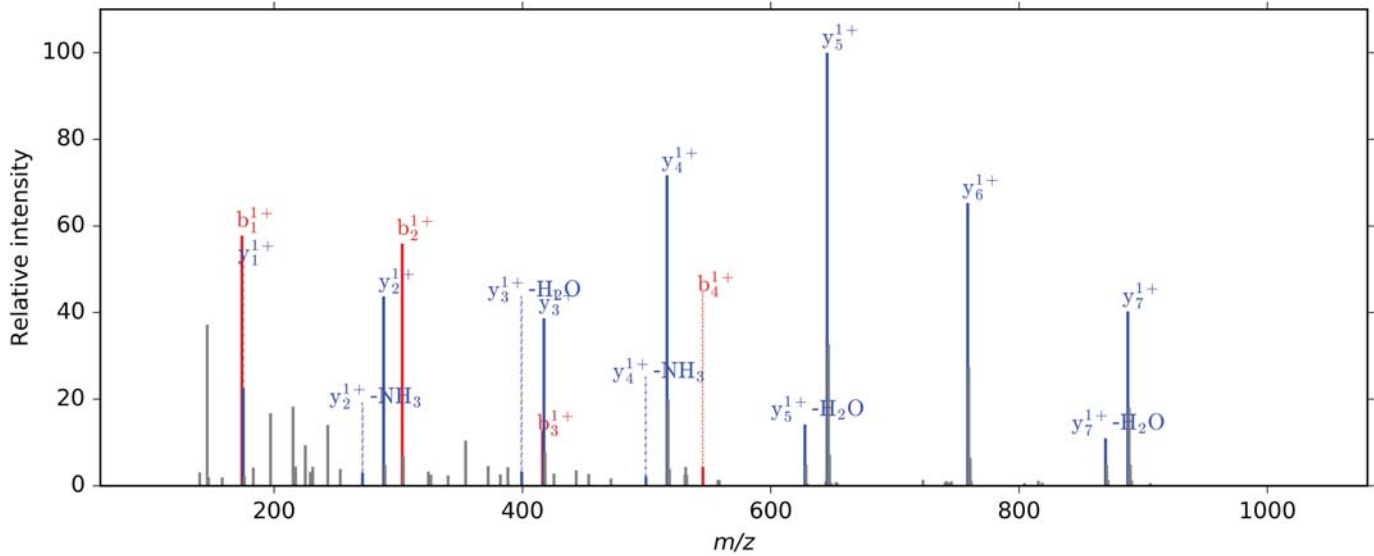

# Ac-MEPGPGAAAPGGHAGEPR

## Peptide identified from sample

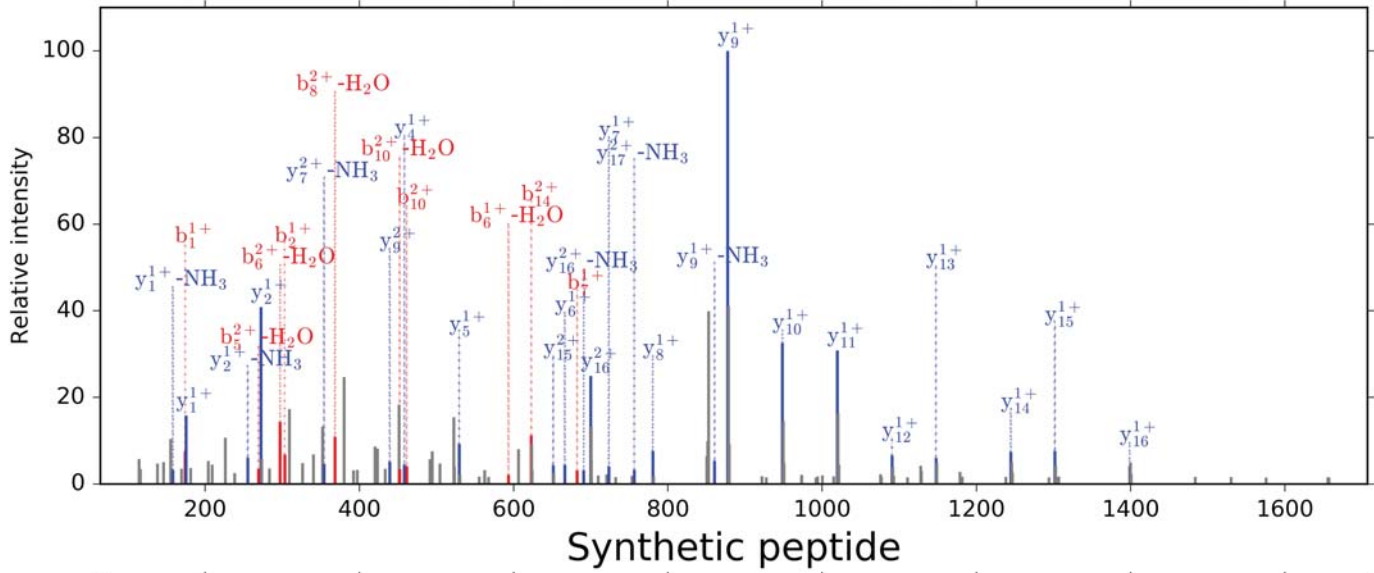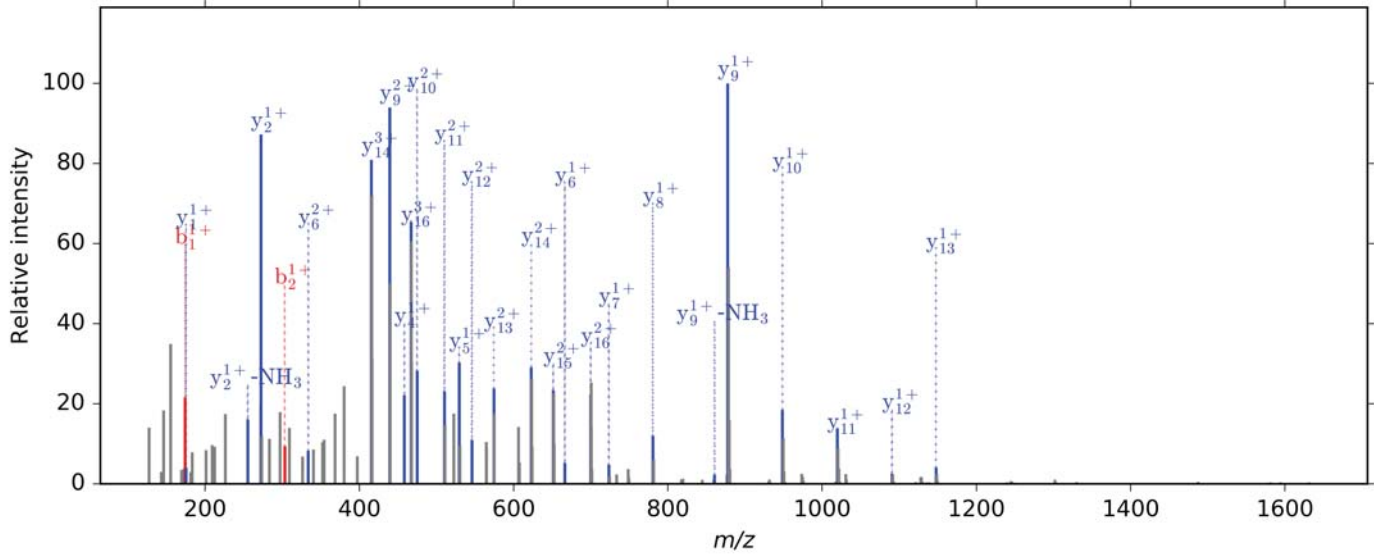

# Ac-MEQFAAAAAHSTPVR

## Peptide identified from sample

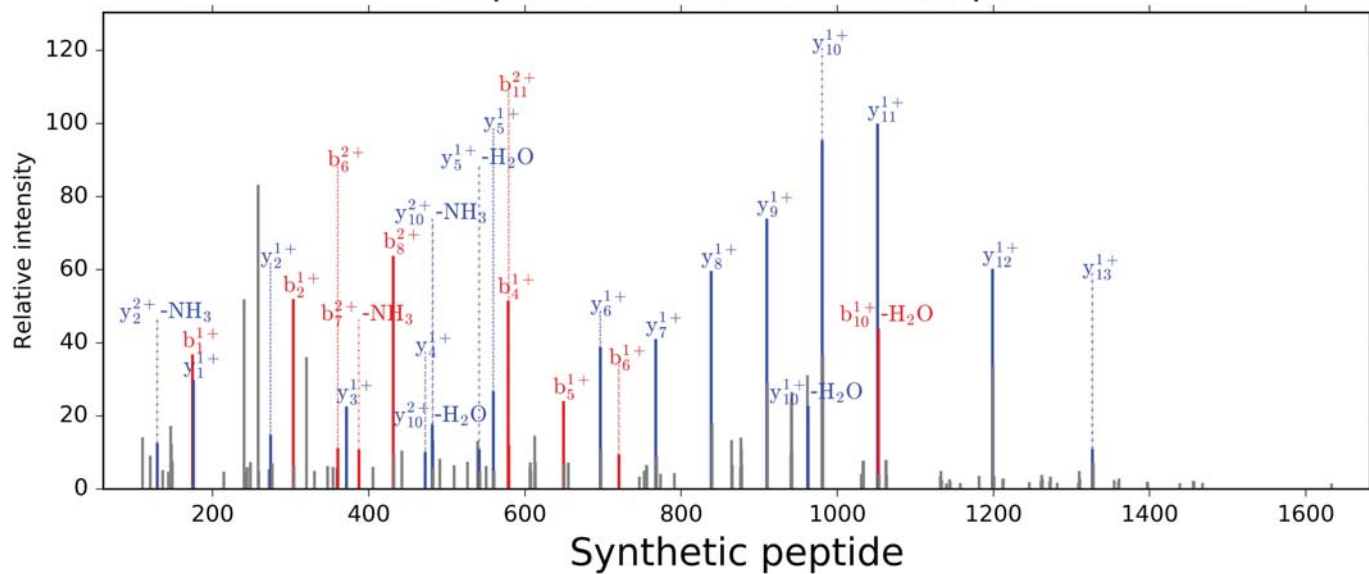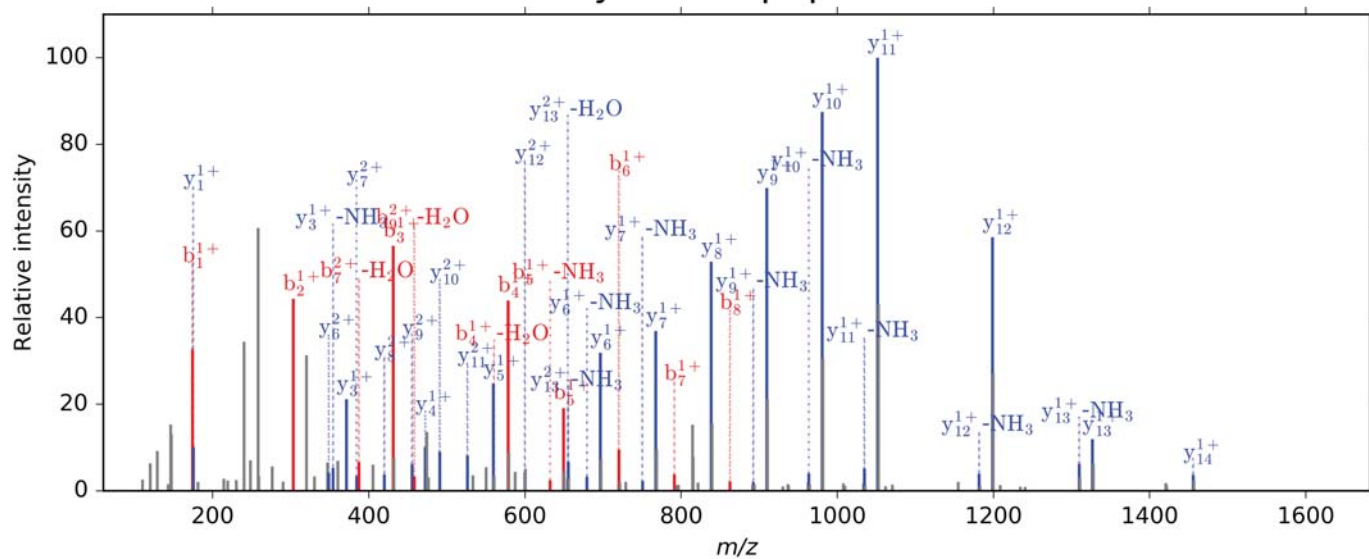



# Ac-AAATAAVKEEEEPSGR

## Peptide identified from sample

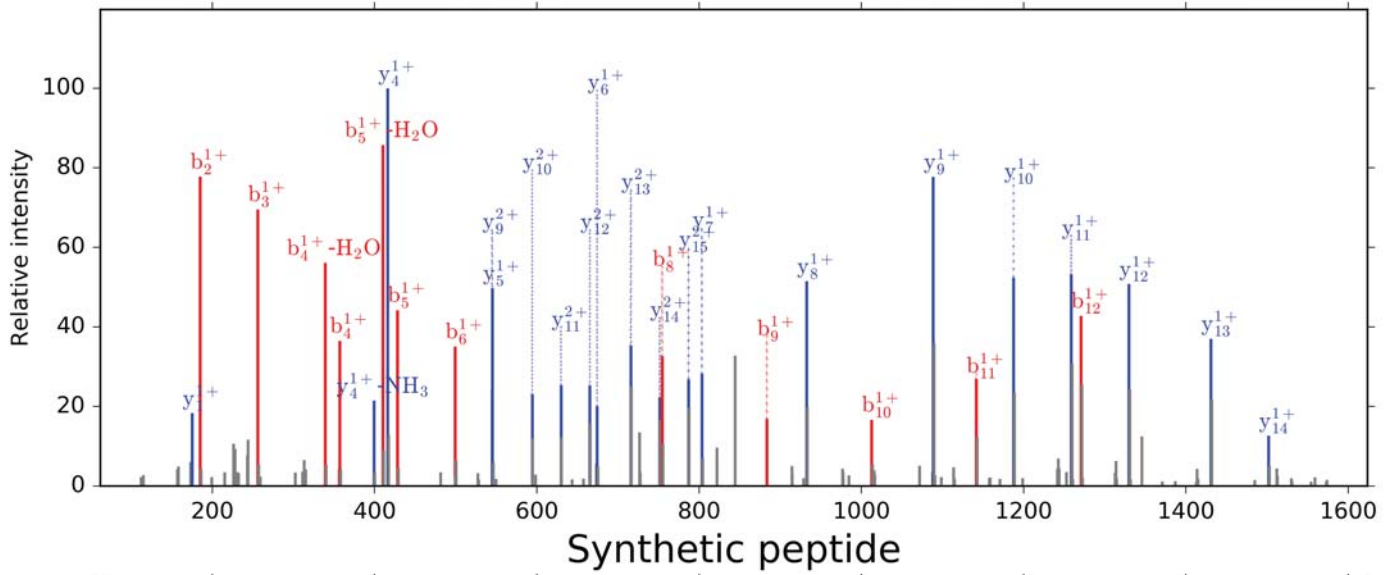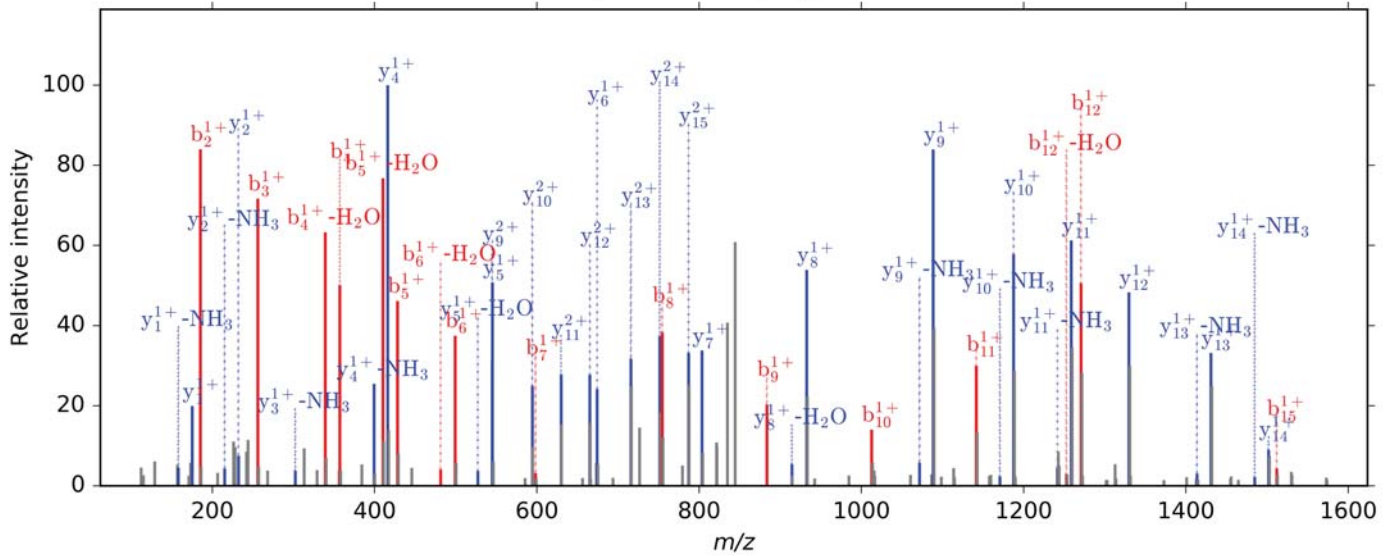



Ac-MEVPGHHAQSQAAPTSSSPGPPGVLGR

Peptide identified from sample

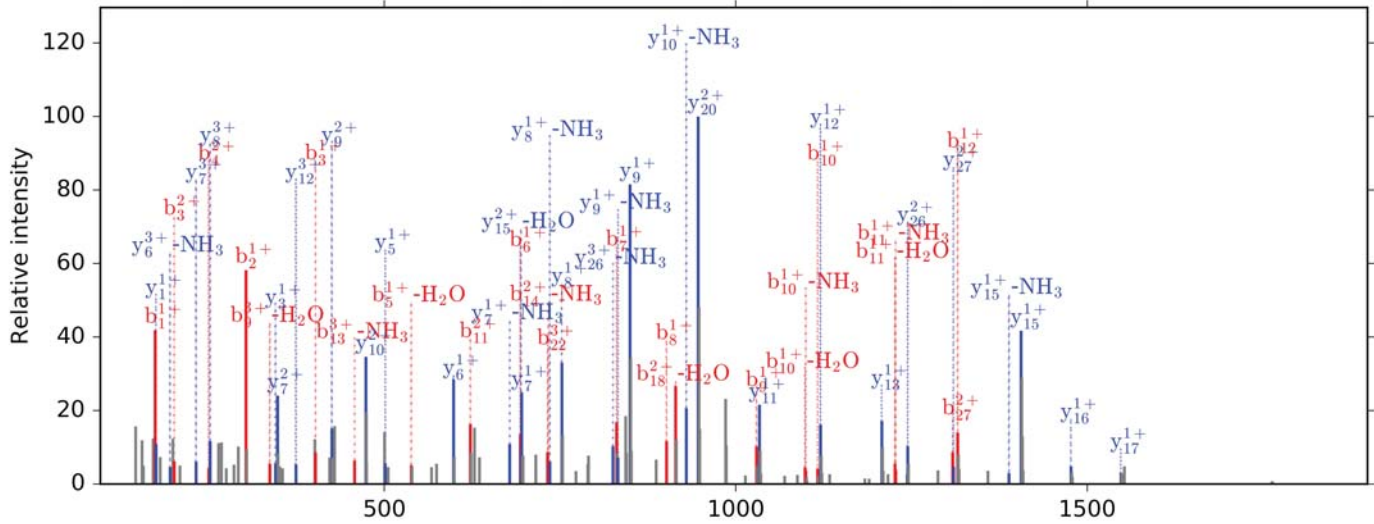

# Ac-MHSPSSCALSSGVPAMSDER

## Peptide identified from sample

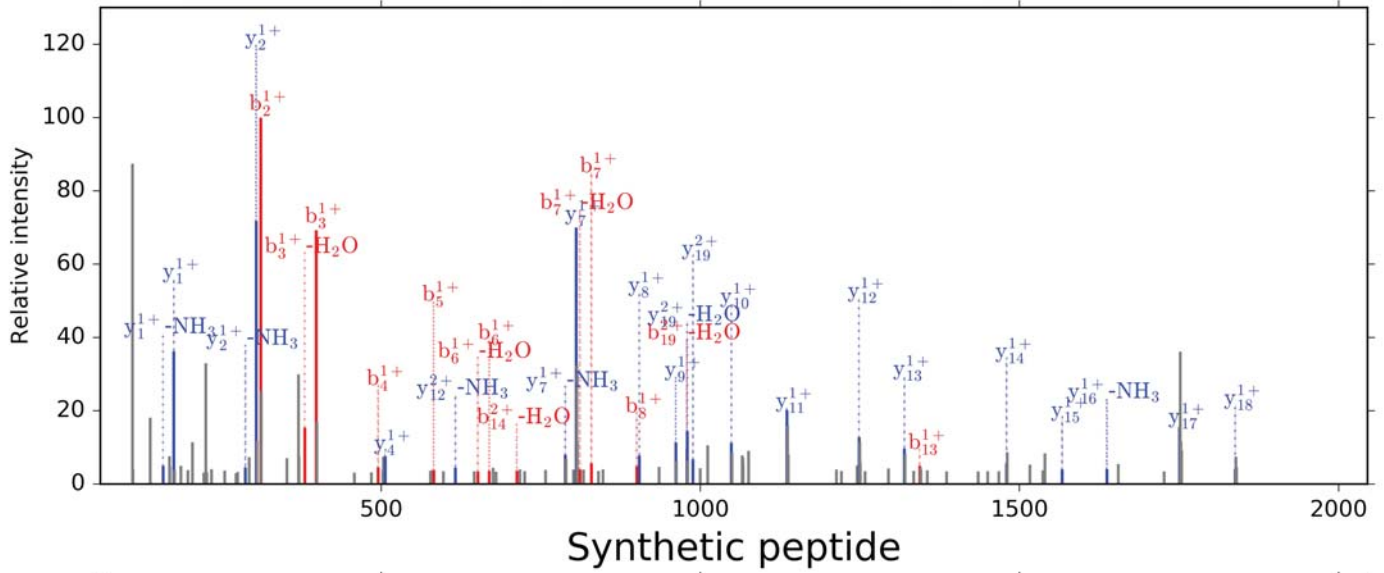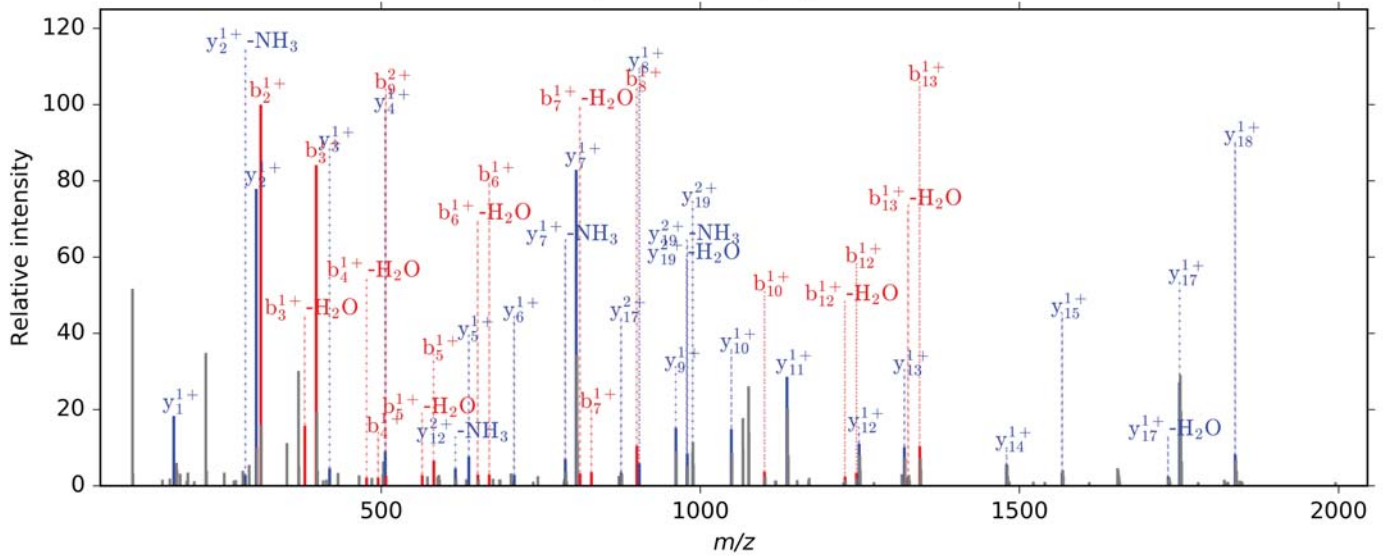

# Ac-MLGHKTPEPAPR

## Peptide identified from sample

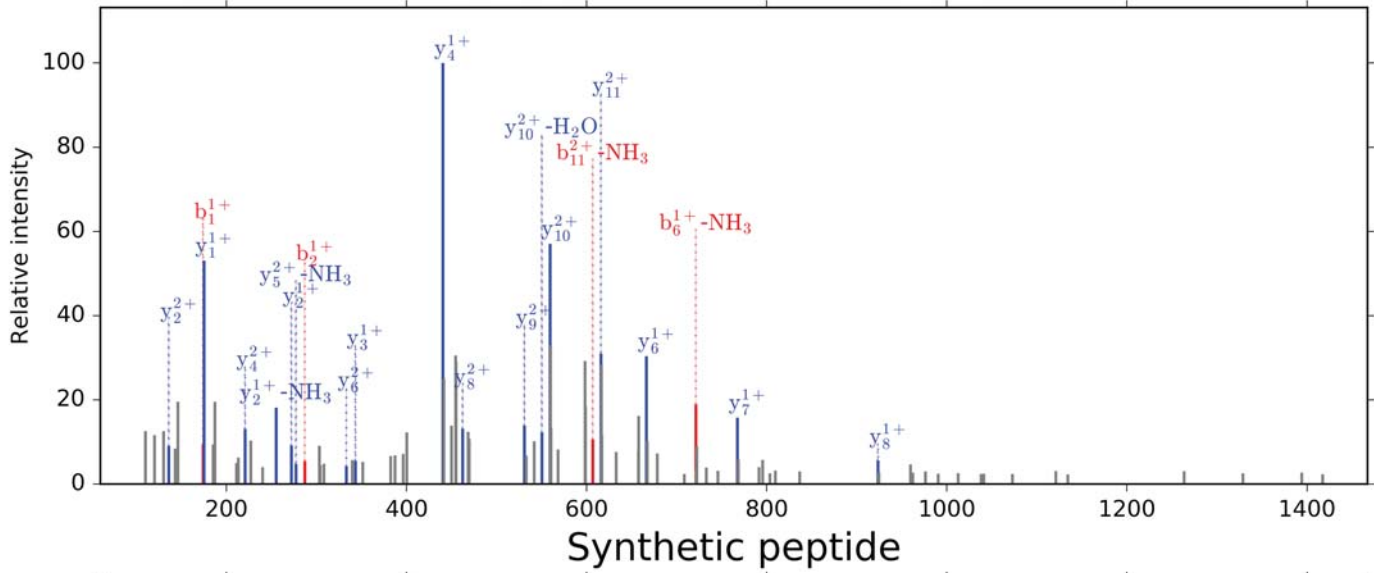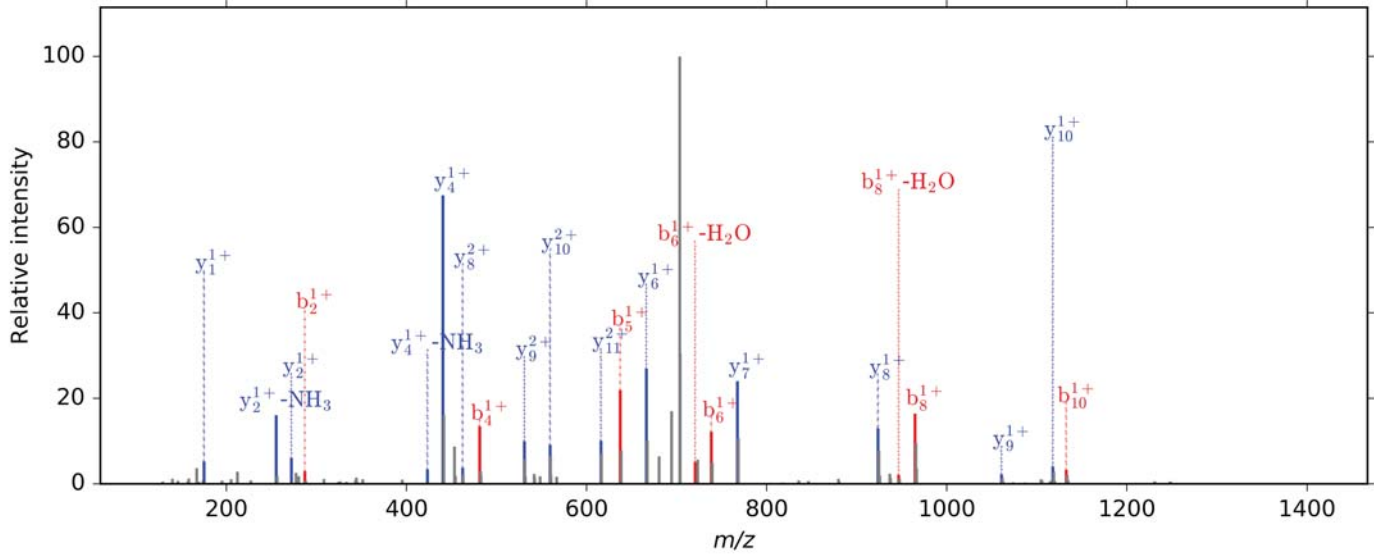

# Ac-MLPWIGSQTAFR

## Peptide identified from sample

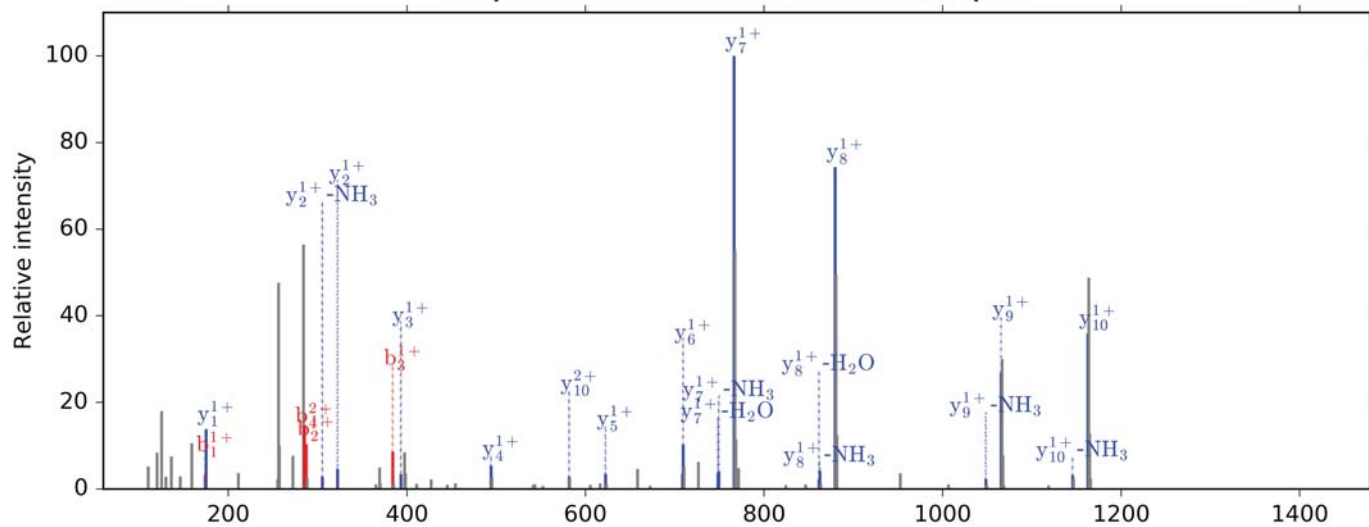

## Synthetic peptide

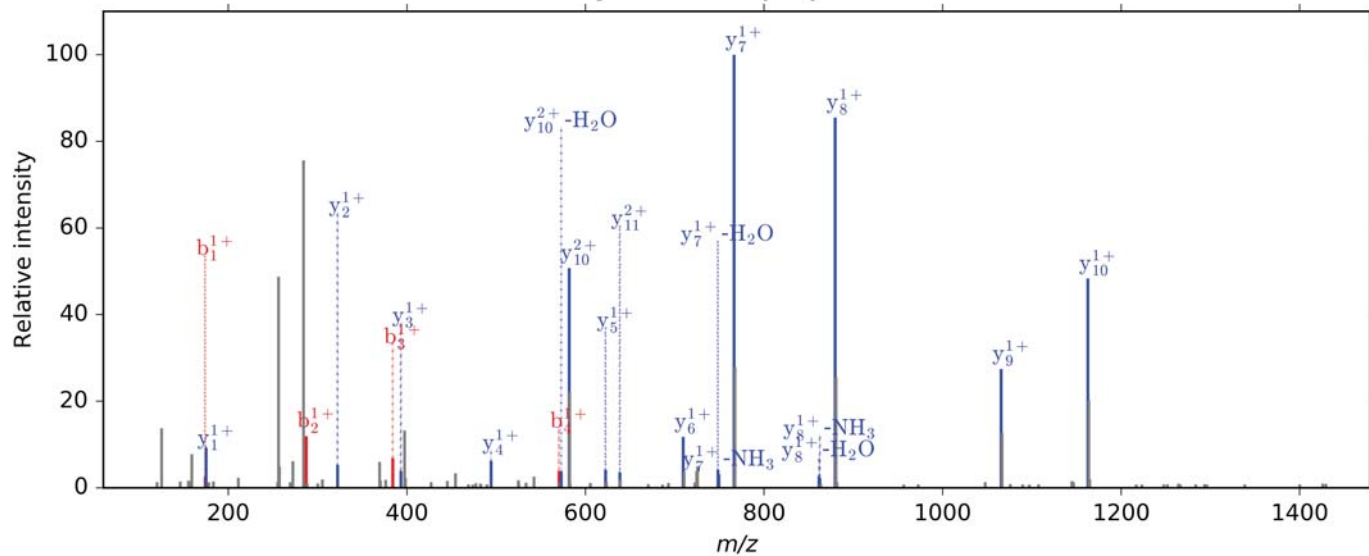



# Ac-MQHRPPGFSR

## Peptide identified from sample

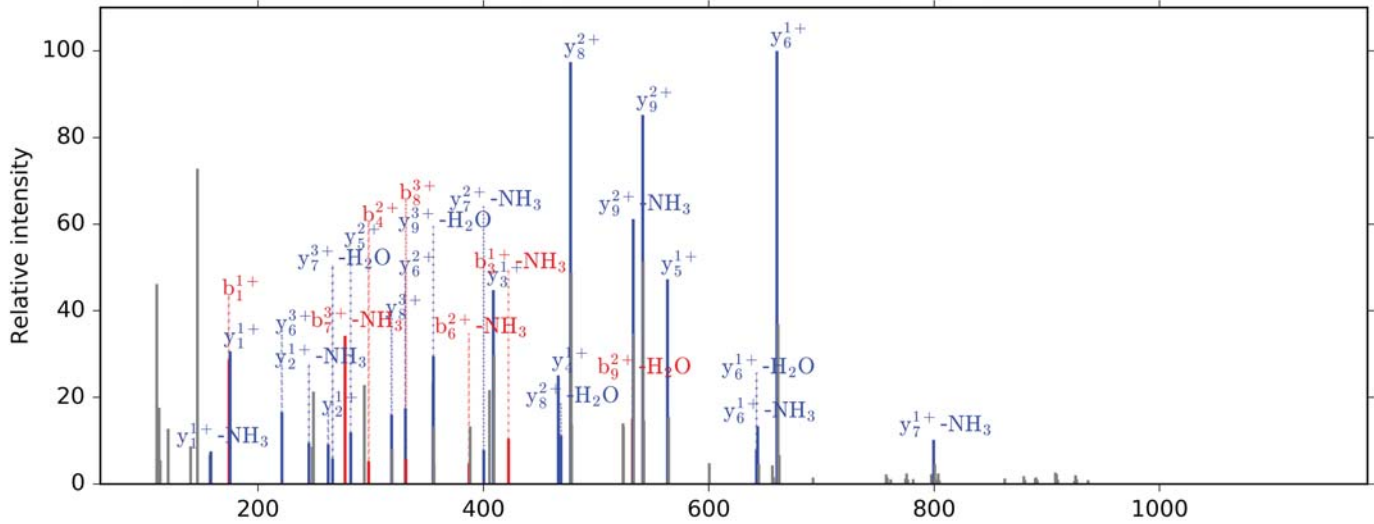

## Synthetic peptide

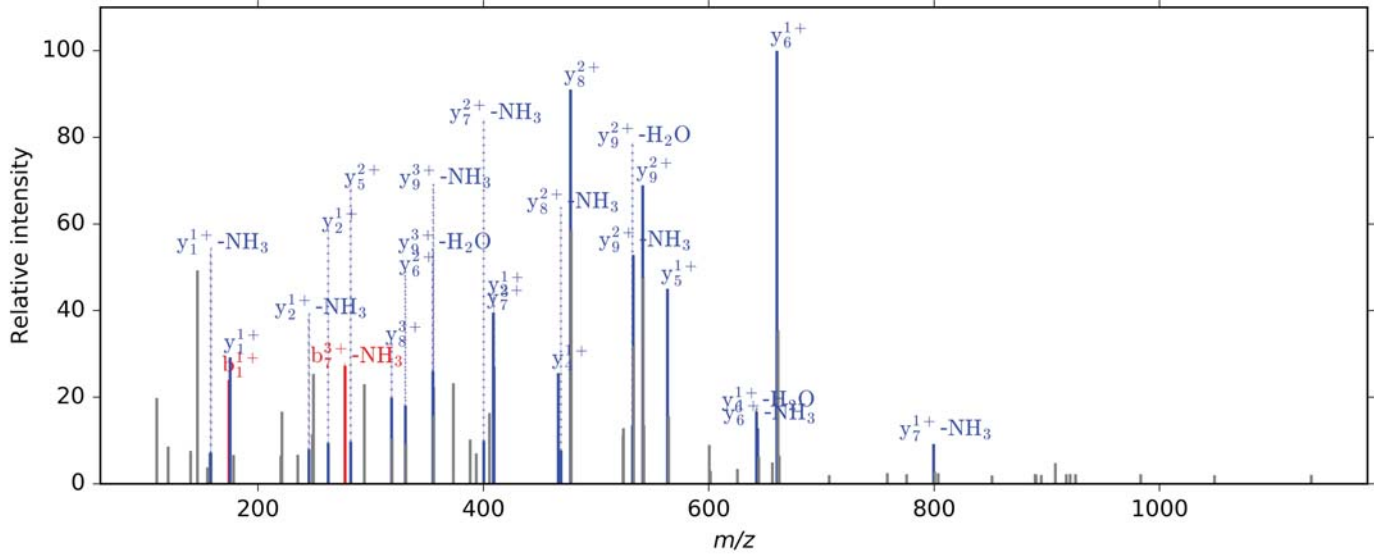

# Ac-MQQQLTTTMSKR

## Peptide identified from sample

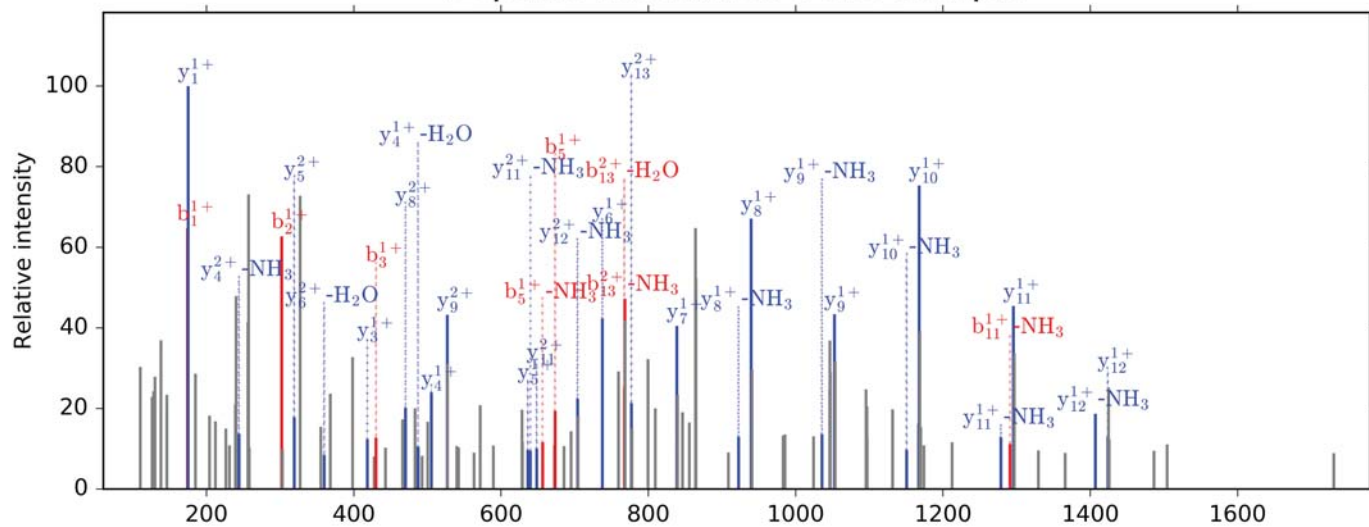

## Synthetic peptide

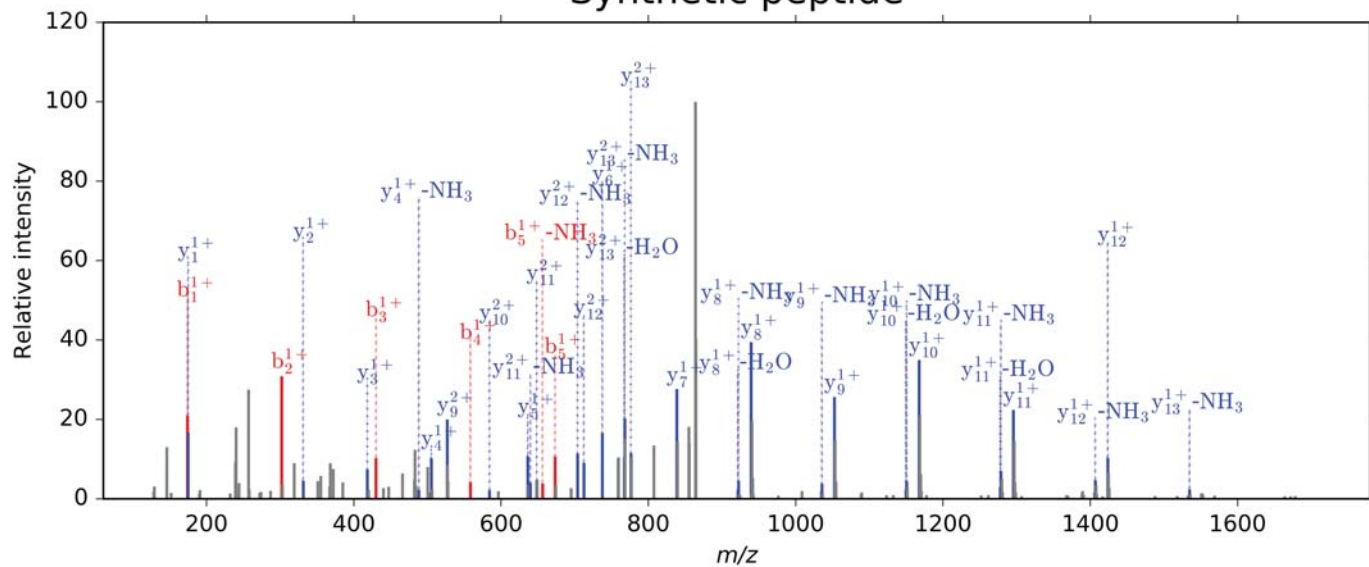



# Ac-SAAEPAAPSPAGGDER

Peptide identified from sample

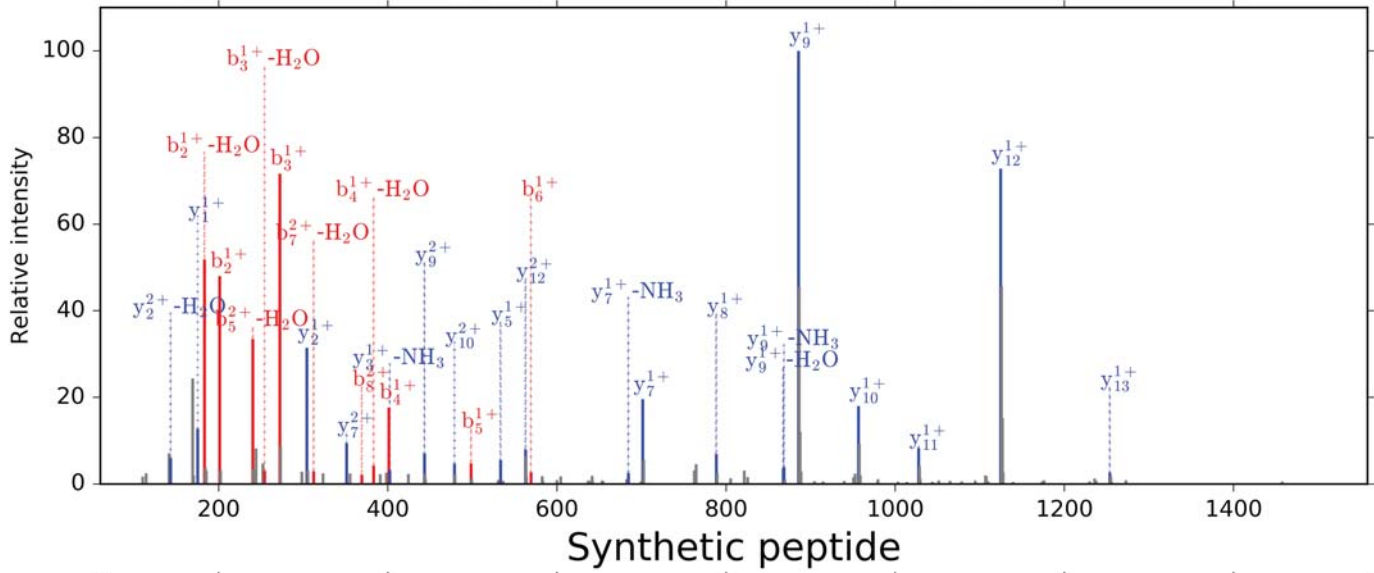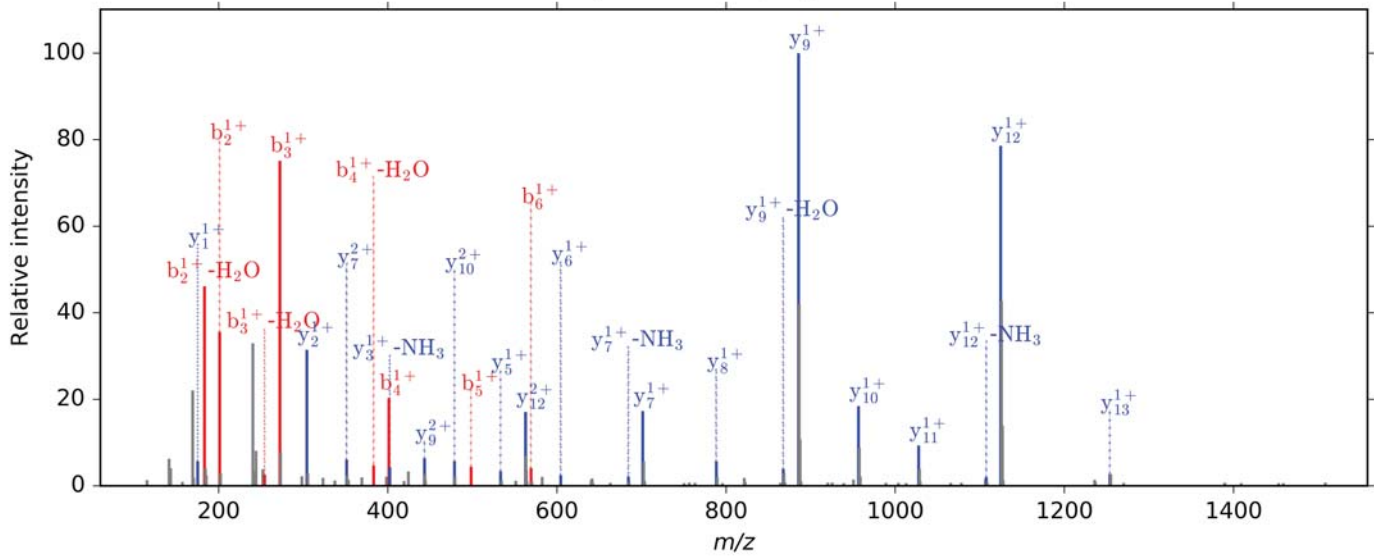

# Ac-SAEPASTPSSEPR

## Peptide identified from sample

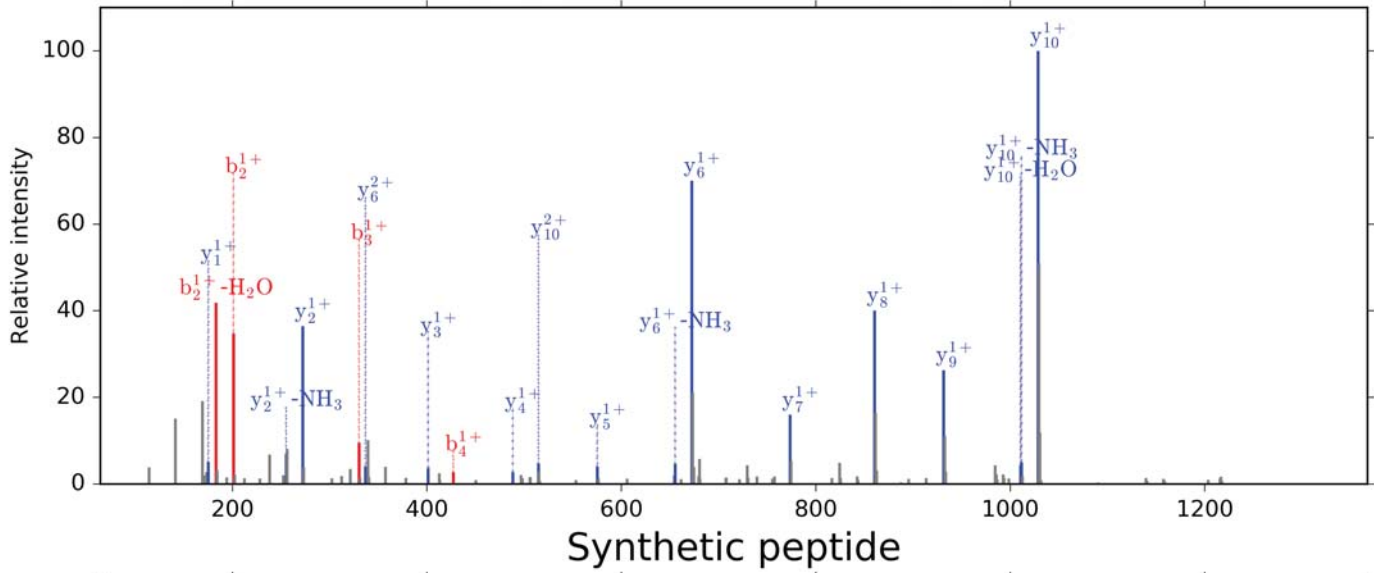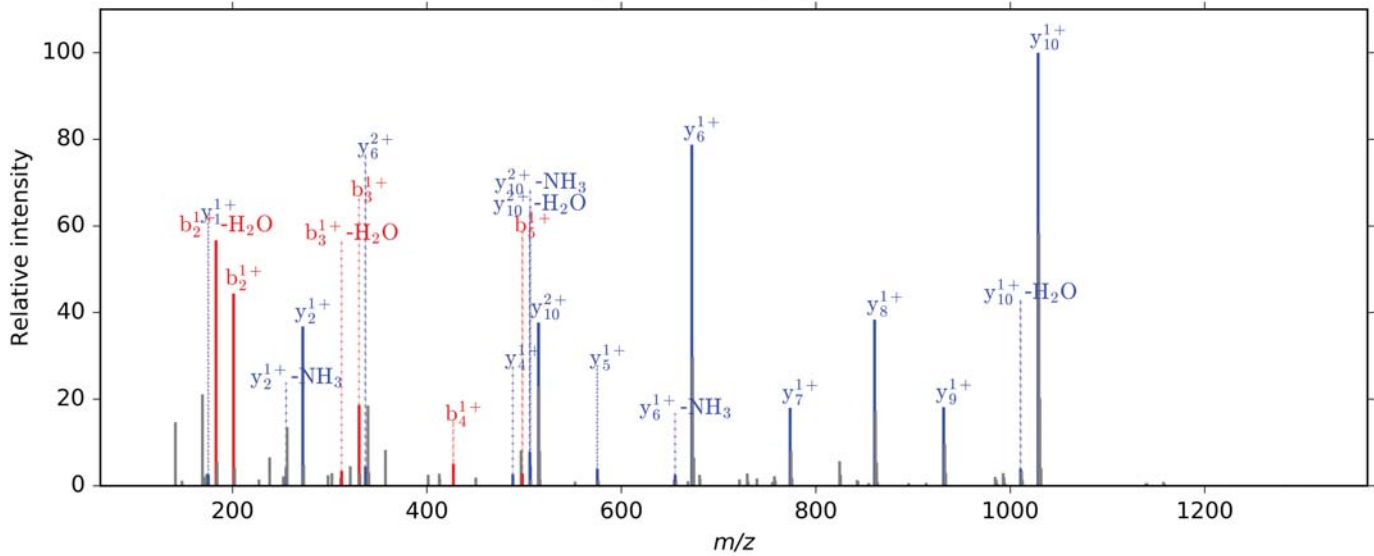

# Ac-SEVSEFEGGPR

## Peptide identified from sample

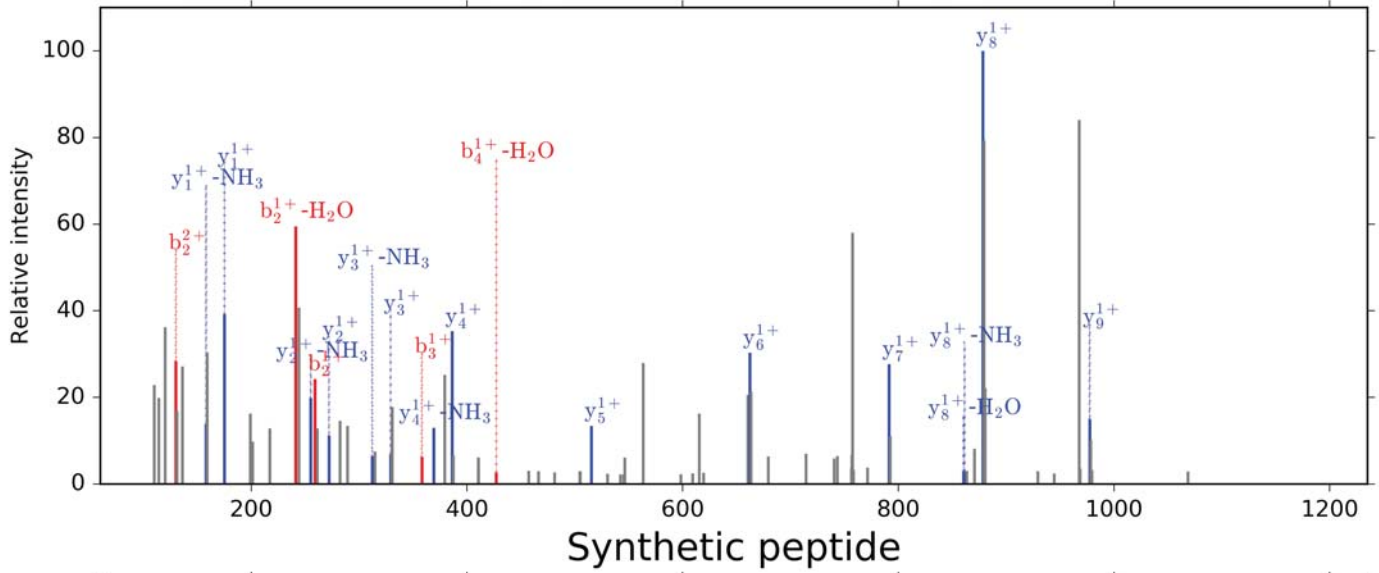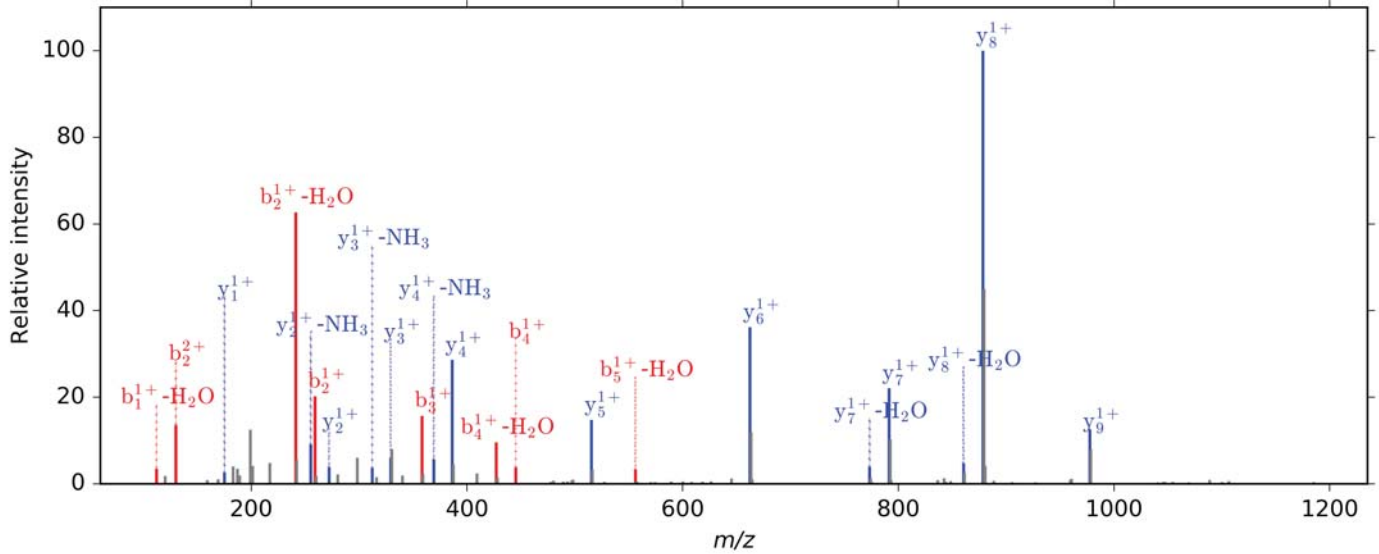

# Ac-TDGPVLLPR

Peptide identified from sample

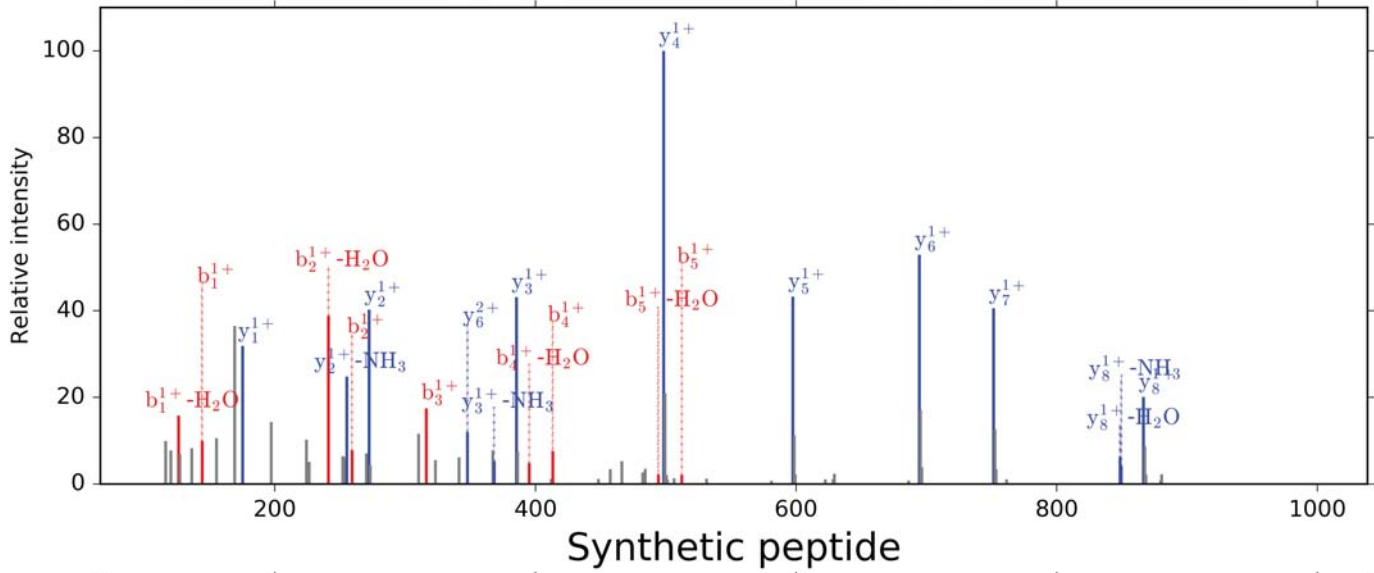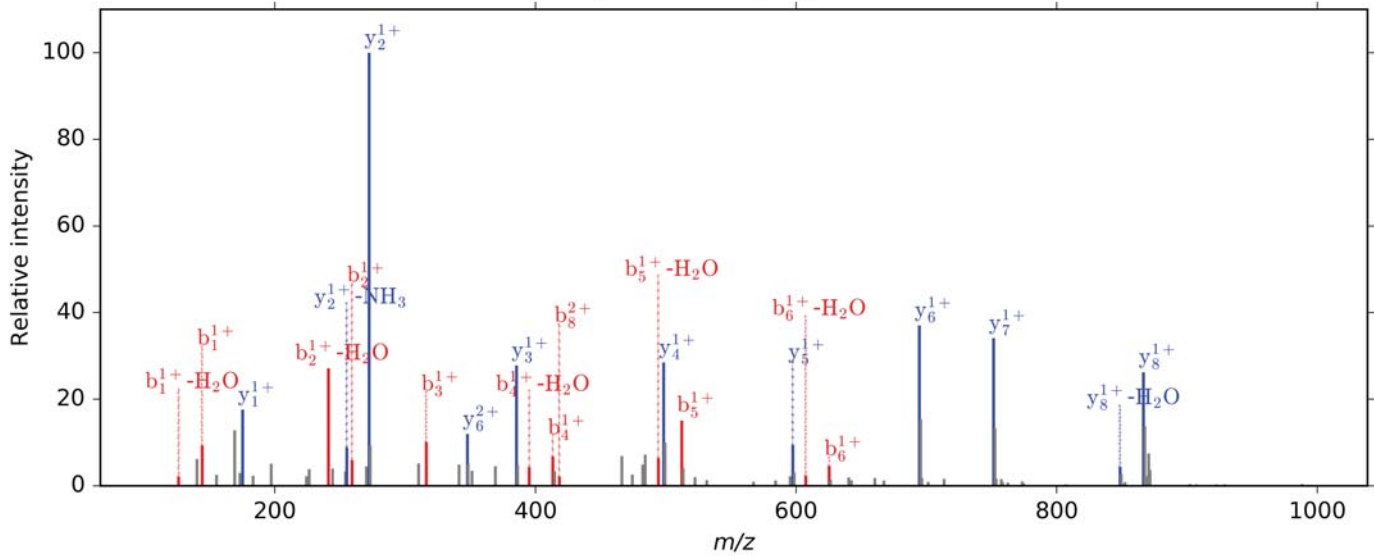

# Ac-AAAAAAAAAGAGAGR

Peptide identified from sample

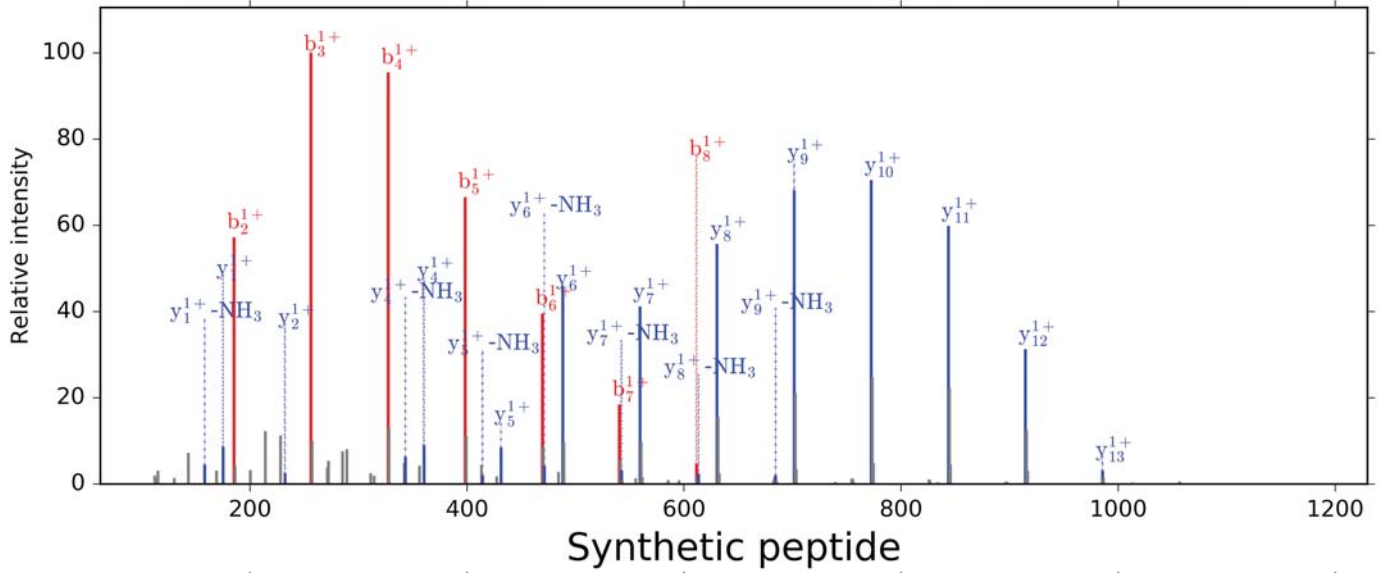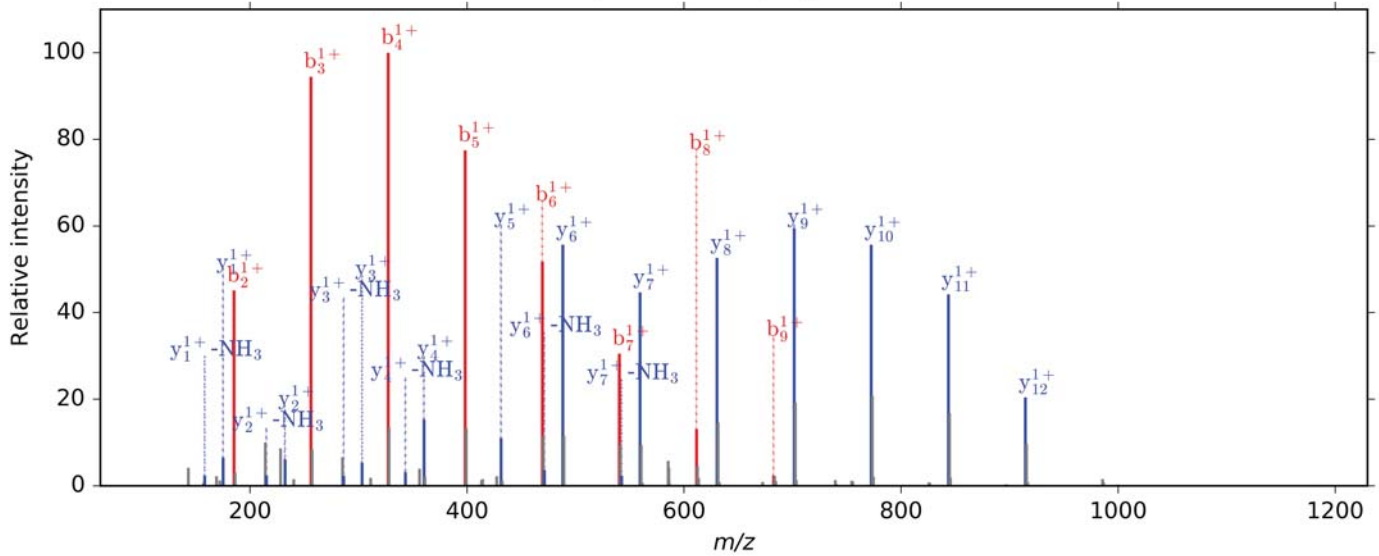

# Ac-AAGDPLAQLQWAGGR

Peptide identified from sample

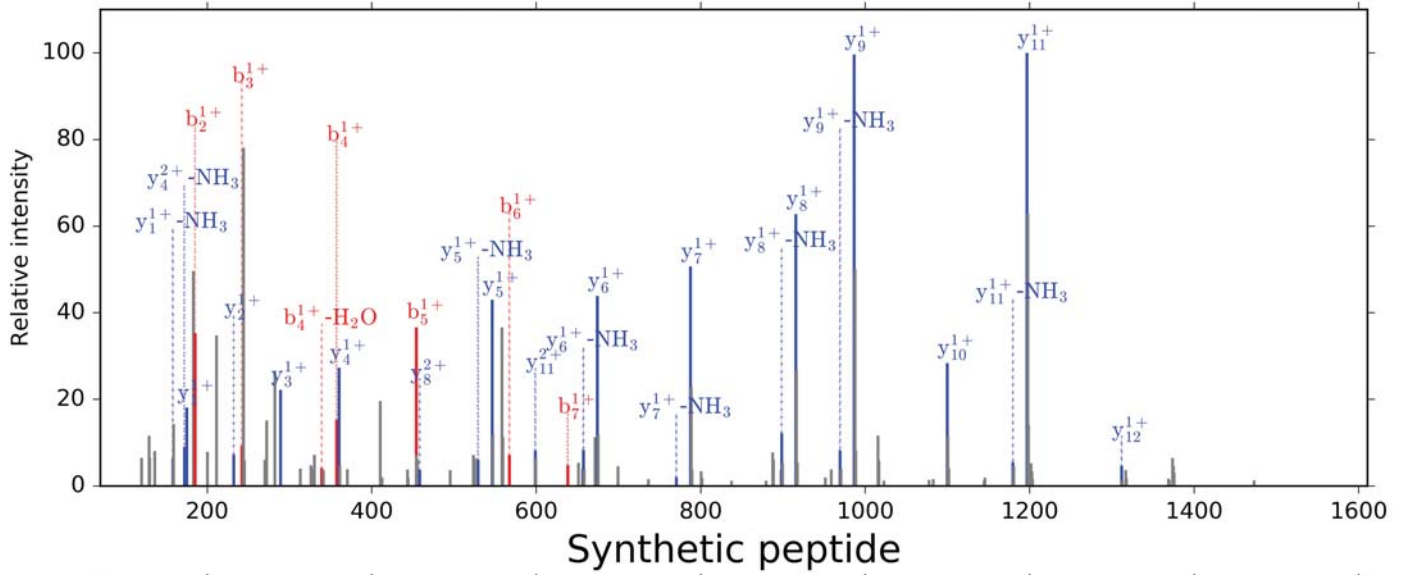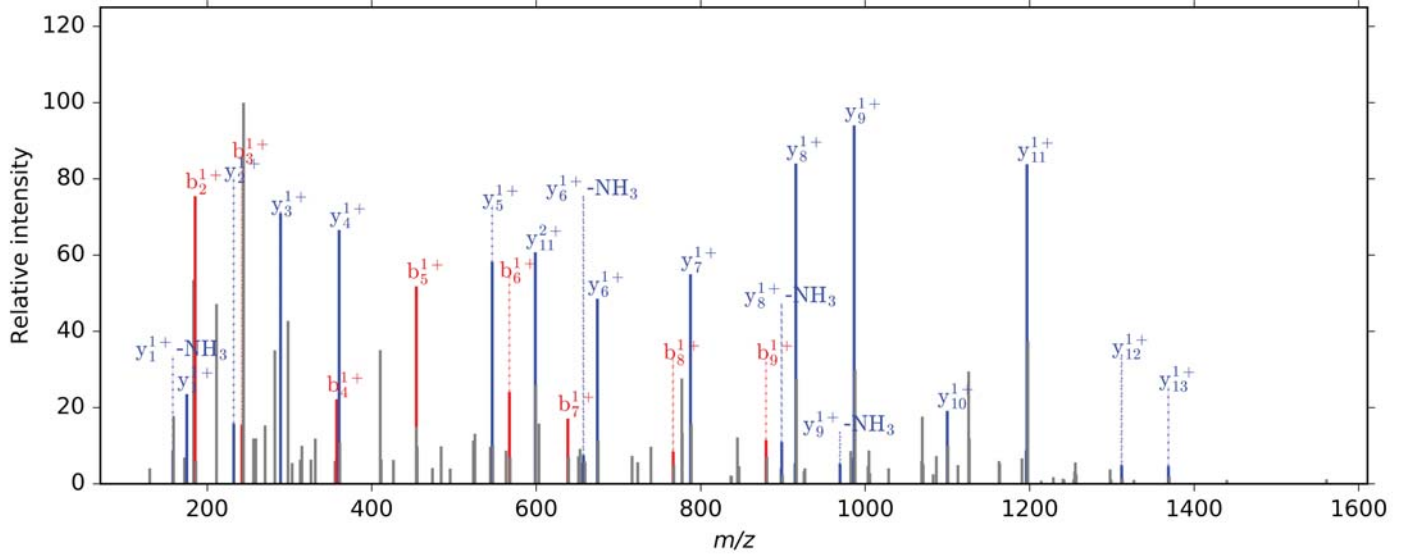

# Ac-AAHSGPSGGSAMR

## Peptide identified from sample

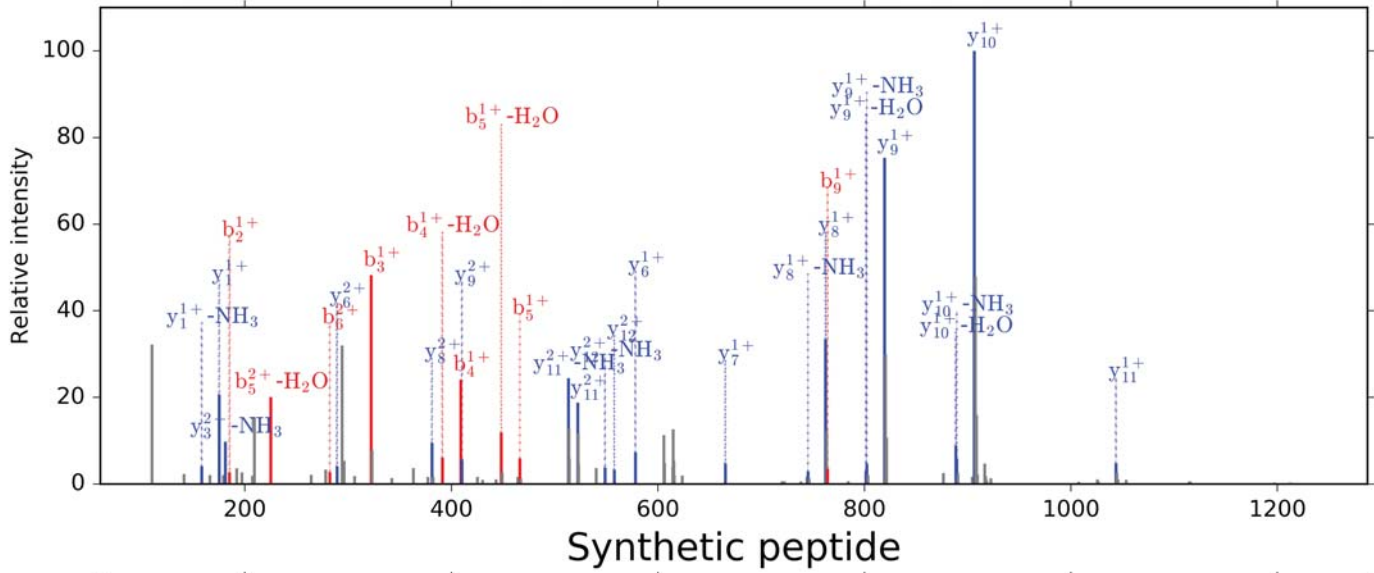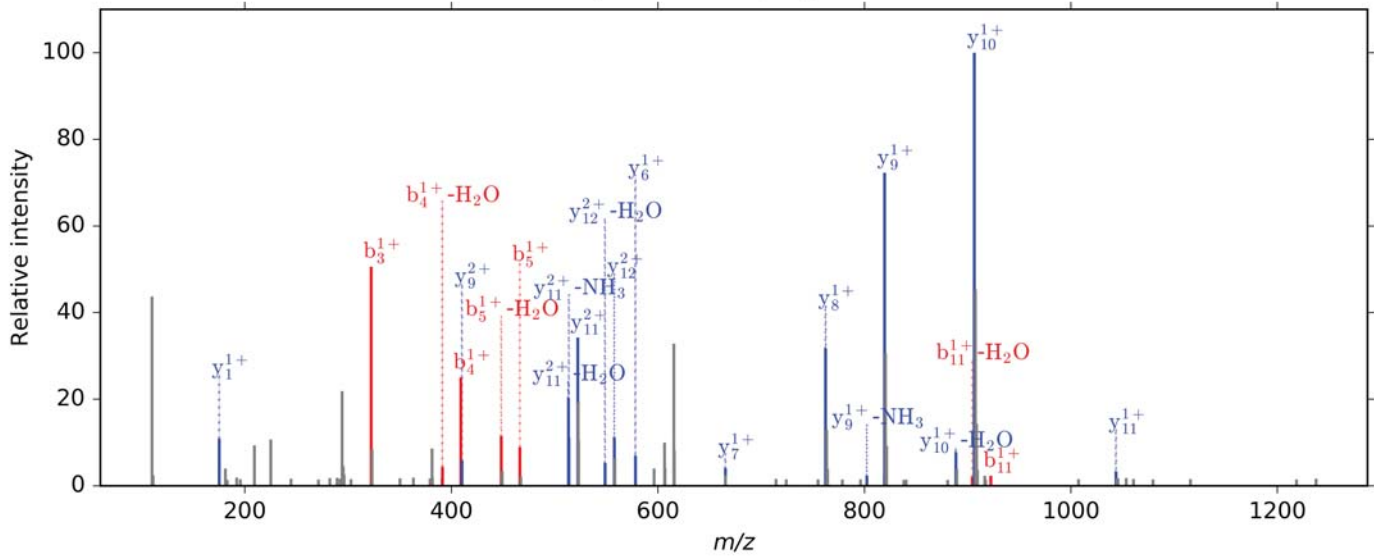

# Ac-AALASAVVPAR

## Peptide identified from sample

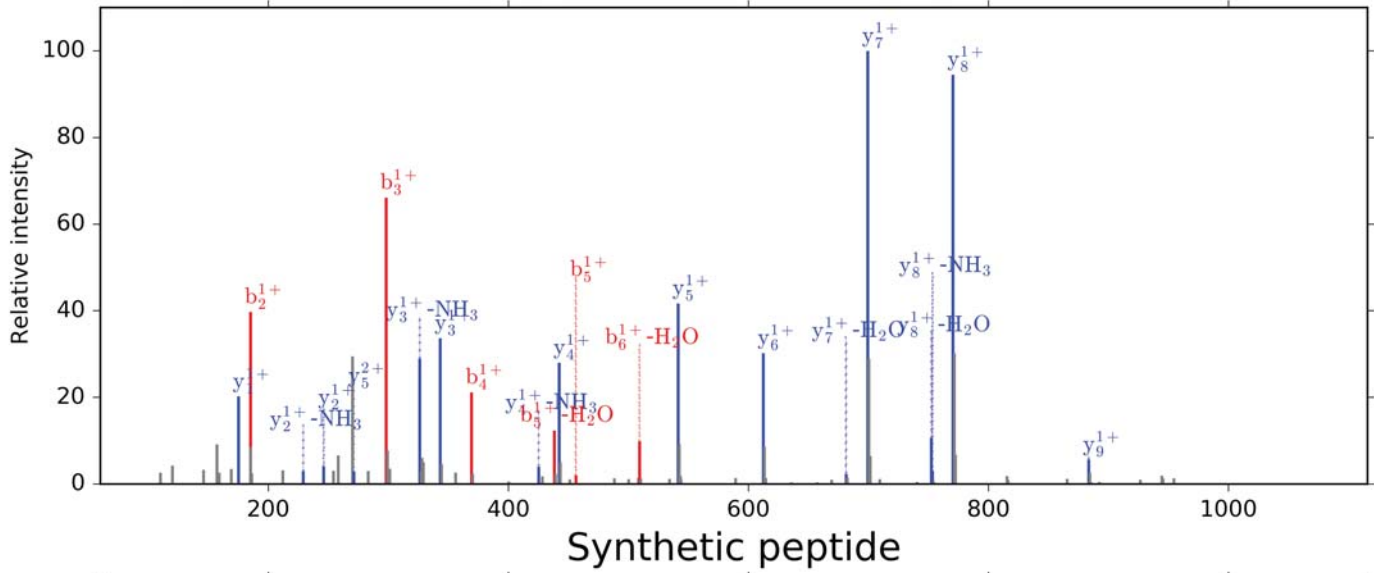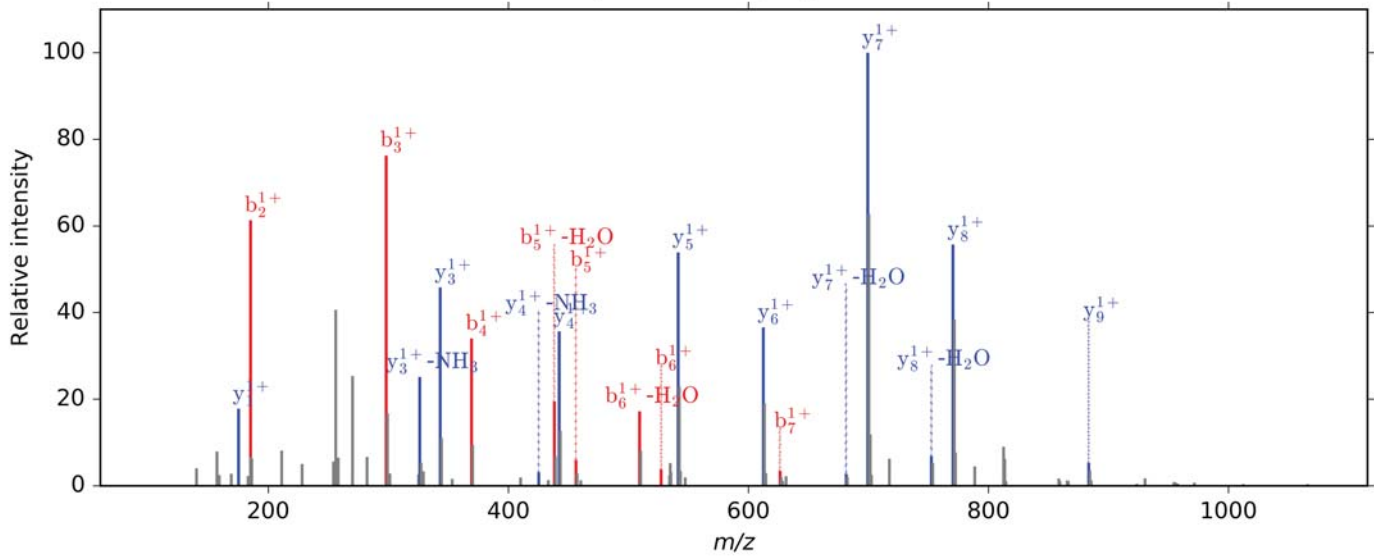



# Ac-AALTWSGTWGEGTMGR

Peptide identified from sample

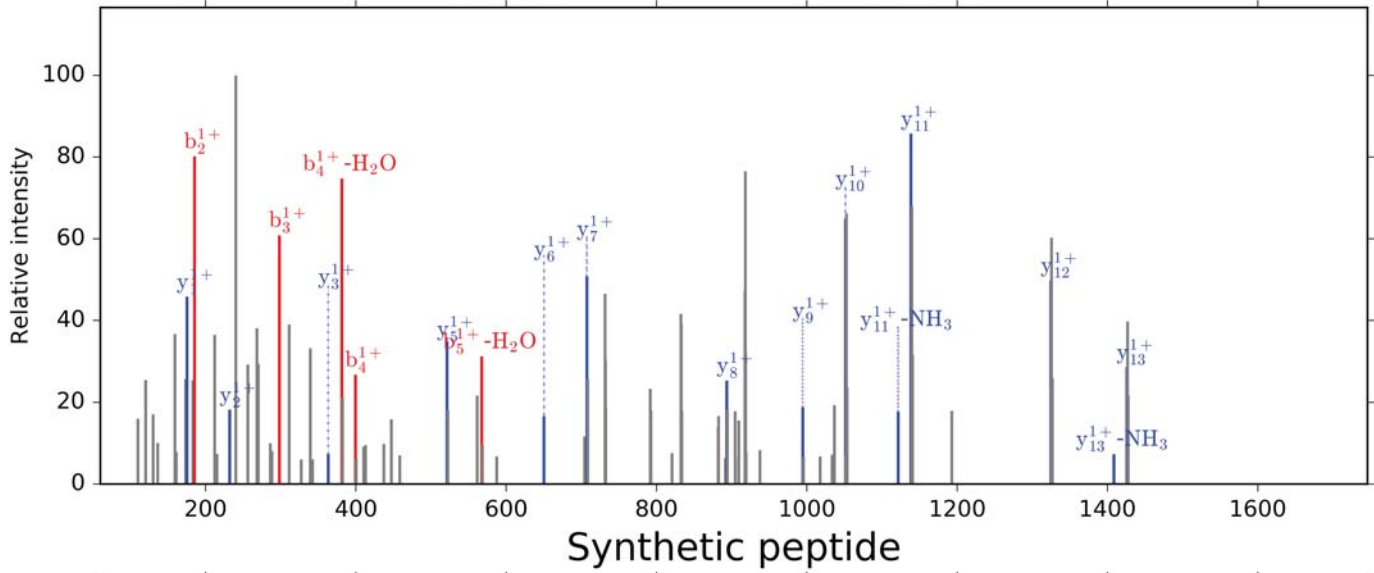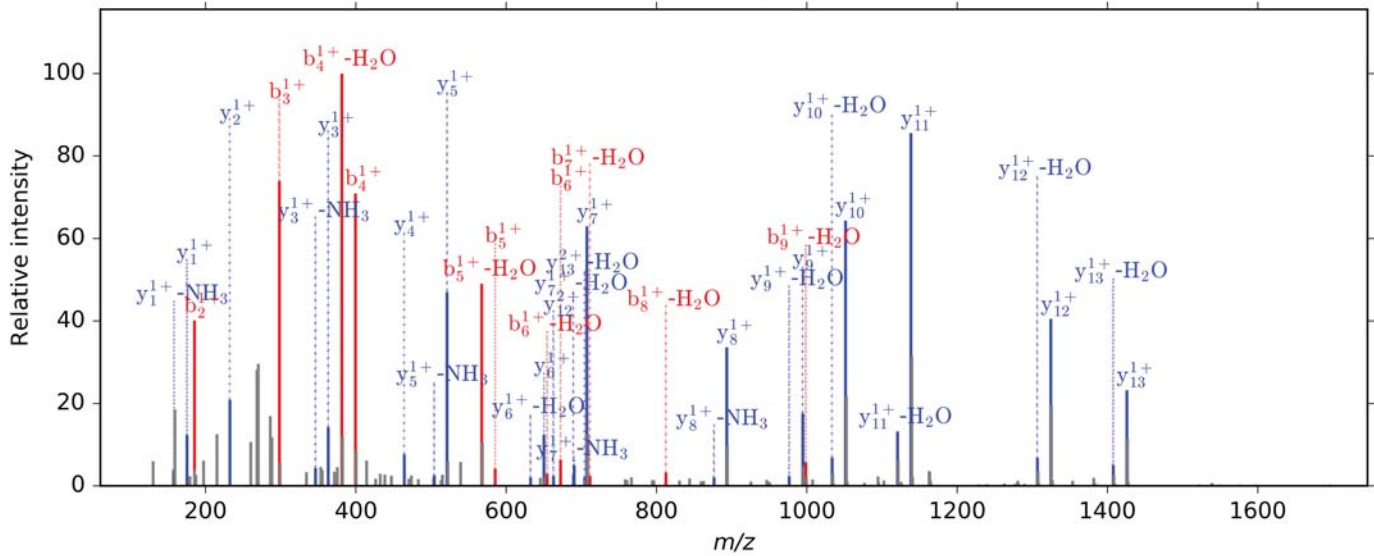

### **Supplemental Figure S2. Spectra validation by synthetic peptides**

The acetylated peptides mapping to 5' UTR were validated with synthetic peptides. The annotated mass spectra derived from samples (top) were aligned from the annotated mass spectra derived from synthetic peptides (bottom).
