# Supplementary material for: Discovery of noncanonical translation initiation sites through mass spectrometric analysis of protein N termini
Source: PubMed Central journal article supplement — Genome Res. 2018 Jan;28(1):25–36. doi: 10.1101/gr.226050.117 (PMC5749180; doi:10.1101/gr.226050.117), 2018-01
Supplement: supp_gr.226050.117_Supplemental_Fig_S4.pdf [file supp_gr.226050.117_Supplemental_Fig_S4.pdf]

# **Supplemental Figure S4**

*IFT46*

Ac-MDSEGLQTKVVENQTYDER

```
00:1|Ac-MDSEGLQTKVVENQTYDER
01:9606|10596|0#NP_001162089|IFT46|Homo_sapiens
01:9606|10596|0#NP_064538|IFT46|Homo_sapiens
01:9606|10596|NM_001168618|IFT46|Homo_sapiens
01:9606|10596|NM_020153|IFT46|Homo_sapiens
02:9598|10596|NM_001279807|IFT46|Pan_troglodytes
04:9913|10596|NM_001075209|IFT46|Bos_taurus
06:10116|10596|NM_001024760|IFT46|Rattus_norvegicus
```

[illegible]

ISRYTPQLIDLHKLKPFIPDFIPAVGDIDAFKLVPRPDGKPDHLGLVLDEPSTKQSDP  
IDAYKTQEVELRPLRPFTIEYIPAMGDVDLFIKVPRPDEIDNVGLTQIDEPSPNQSDA  
-----  
IDAYKTQEVELRPLRPFTIEYIPAMGDVDLFIKVPRPDEIDNVGLTQIDEPSPNQSDA  
IDAYKTQEVELRPLRPFTIEYIPAMGDVDLFIKVPRPDEIDNVGLTQIDEPSPNQSDA

TVLSLWLWTENSKQHNI-TQHMVKVLSLEDAEKNPKAIDTWIESISELHRSKPAPTWHYTRP  
TVLSLWLWTENSKQHNI-TQHMVKVLSLEDAEKNPKAIDTWIESISELHRSKPAPTWHYTRP  
TVLSLWLWTENSKQHNI-TQHMVKVLSLEDAEKNPKAIDTWIESISELHRSKPAPTWHYTRP  
TVLSLWLWTENSKQHNI-TQHMVKVLSLEDAEKNPKAIDTWIESISELHRSKPAPTWHYTRP  
TVLSLWLWTENSKQHNI-TQHMVKVLSLEDAEKNPKAIDTWIESISELHRSKPAPTWHYTRP  
TVLSLWLWTENSKQHNI-TQHMVKVLSLEDAEKNPKAIDTWIESISELHRSKPAPTWHYTRP  
TVLSLWLWTENSKQHNI-TQHMVKVLSLEDAEKNPKAIDTWIESISELHRSKPAPTWHYTRP  
TVLSLWLWTENSKQHNI-TQHMVKVLSLEDAEKNPKAIDTWIESISELHRSKPAPTWHYTRP  
TVLSLWLWTENSKQHNI-TQHMVKVLSLEDAEKNPKAIDTWIESISELHRSKPAPTWHYTRP  
TIVDMQIRNATKDAAILDDDPVKLLERADENPDEIKKWSIDKEFHKSQAPTWHYRTO  
TIVDMQIRNATKDAAILDDDPVKLLERADENPDEIKKWSIDKEFHKSQAPTWHYRTO  
TIVDMQIRNATKDAAILDDDPVKLLERADENPDEIKKWSIDKEFHKSQAPTWHYRTO  
TIVDMQIRNATKDAAILDDDPVKLLERADENPDEIKKWSIDKEFHKSQAPTWHYRTO

[illegible]

SLYSEFKNSQHFKALAEGKKAFT PSSNSTSQAGDMETLTF  
 SLYSEFKNSQHFKALAEGKKAFT PSSNSTSQAGDMETLTF  
 SLYSEFKNSQHFKALAEGKKAFT PSSNSTSQAGDMETLTF  
 SLYSEFKNSQHFKALAEGKKAFT PSSNSTSQAGDMETLTF  
 SLYSEFKNSQHFKALAEGKKAFT PSSNSTSQAGDMETLTF  
 SLYSEFKNSQHFKALAEGKKAFT PSSNSTSQAGDMETLTF  
 SLYSEFKNSQHFKALAEGKKAFT PSSNSTSQAGDAETLSPL  
 SLYSEFKNSQHFKALAEGKKVFTPPNSASQAGDAETLTFI  
 SLLNEFNNSQHFRNLAQNNNLGGETGE-----TMDRLEL-  
 -----  
 SLLNEFNNSQHFRNLAQNNNLGGETGE-----TMDRLEL-  
 SLLNEFNNSQHFRNLAQNNNLGGETGE-----TMDRLEL-

*FLNA*

Ac-MQHRPPGFSR

|          |      |                |       |                         |                                                            |
|----------|------|----------------|-------|-------------------------|------------------------------------------------------------|
| 01:9606  | 1119 | 0#NP_001104026 | FLNA  | Homo_sapiens            |                                                            |
| 01:9606  | 1119 | 0#NP_001447    | FLNA  | Homo_sapiens            |                                                            |
| 01:9606  | 1119 | NM_001110556   | FLNA  | Homo_sapiens            |                                                            |
| 01:9606  | 1119 | NM_001456      | FLNA  | Homo_sapiens            |                                                            |
| 04:9913  | 1119 | NM_001206514   | FLNA  | Bos_taurus              |                                                            |
| 06:10116 | 1119 | NM_001134599   | Flna  | Rattus_norvegicus       |                                                            |
| 07:10090 | 1119 | NM_001290421   | Flna  | Mus_musculus            |                                                            |
| 07:10090 | 1119 | NM_010227      | Flna  | Mus_musculus            |                                                            |
| 08:9031  | 1119 | NM_204574      | FLNA  | Gallus_gallus           |                                                            |
| 12:7227  | 1119 | NM_001144595   | cher  | Drosophila_melanogaster |                                                            |
| 12:7227  | 1119 | NM_001202309   | cher  | Drosophila_melanogaster |                                                            |
| 12:7227  | 1119 | NM_001275727   | cher  | Drosophila_melanogaster |                                                            |
| 12:7227  | 1119 | NM_001275728   | cher  | Drosophila_melanogaster | QVKFRNLCKVEEKIMLPVKMPNKSADMAPNAGDRRQTSTFKNKNLFNGGTCSSNNADG |
| 12:7227  | 1119 | NM_001275729   | cher  | Drosophila_melanogaster |                                                            |
| 12:7227  | 1119 | NM_001275730   | cher  | Drosophila_melanogaster | QVKFRNLCKVEEKIMLPVKMPNKSADMAPNAGDRRQTSTFKNKNLFNGGTCSSNNADG |
| 12:7227  | 1119 | NM_079659      | cher  | Drosophila_melanogaster | FNGGTCSSNNADG                                              |
| 12:7227  | 1119 | NM_169746      | cher  | Drosophila_melanogaster |                                                            |
| 12:7227  | 1119 | NM_169747      | cher  | Drosophila_melanogaster |                                                            |
| 12:7227  | 1119 | NM_206502      | cher  | Drosophila_melanogaster | FNGGTCSSNNADG                                              |
| 13:6239  | 1119 | NM_001028379   | fln-1 | Caenorhabditis_elegans  |                                                            |
| 13:6239  | 1119 | NM_001028380   | fln-1 | Caenorhabditis_elegans  |                                                            |
| 13:6239  | 1119 | NM_001038368   | fln-1 | Caenorhabditis_elegans  |                                                            |
| 13:6239  | 1119 | NM_001129351   | fln-1 | Caenorhabditis_elegans  |                                                            |
| 13:6239  | 1119 | NM_001268291   | fln-1 | Caenorhabditis_elegans  |                                                            |
| 13:6239  | 1119 | NM_001268292   | fln-1 | Caenorhabditis_elegans  |                                                            |
| 13:6239  | 1119 | NM_001268293   | fln-1 | Caenorhabditis_elegans  |                                                            |
| 13:6239  | 1119 | NM_001307431   | fln-1 | Caenorhabditis_elegans  |                                                            |
| 13:6239  | 1119 | NM_001307432   | fln-1 | Caenorhabditis_elegans  |                                                            |
| 13:6239  | 1119 | NM_001307433   | fln-1 | Caenorhabditis_elegans  |                                                            |
| 13:6239  | 1119 | NM_001307434   | fln-1 | Caenorhabditis_elegans  |                                                            |
| 13:6239  | 1119 | NM_001307435   | fln-1 | Caenorhabditis_elegans  |                                                            |
| 13:6239  | 1119 | NM_001307436   | fln-1 | Caenorhabditis_elegans  |                                                            |
| 13:6239  | 1119 | NM_001307437   | fln-1 | Caenorhabditis_elegans  |                                                            |
| 13:6239  | 1119 | NM_001307438   | fln-1 | Caenorhabditis_elegans  |                                                            |
| 13:6239  | 1119 | NM_001307439   | fln-1 | Caenorhabditis_elegans  |                                                            |
| 13:6239  | 1119 | NM_001307440   | fln-1 | Caenorhabditis_elegans  |                                                            |
| 13:6239  | 1119 | NM_001307441   | fln-1 | Caenorhabditis_elegans  |                                                            |
| 13:6239  | 1119 | NM_001307442   | fln-1 | Caenorhabditis_elegans  |                                                            |
| 13:6239  | 1119 | NM_001307443   | fln-1 | Caenorhabditis_elegans  |                                                            |

|          |                                                |  |  |  |  |                                                              |         |
|----------|------------------------------------------------|--|--|--|--|--------------------------------------------------------------|---------|
|          |                                                |  |  |  |  |                                                              |         |
| 00:1     | Ac-MQHRPPGFSR                                  |  |  |  |  |                                                              |         |
| 01:9606  | 1119 0#NP_001104026 FLNA Homo_sapiens          |  |  |  |  |                                                              |         |
| 01:9606  | 1119 0#NP_001447 FLNA Homo_sapiens             |  |  |  |  |                                                              |         |
| 01:9606  | 1119 NM_001110556 FLNA Homo_sapiens            |  |  |  |  | R--AVPSPR                                                    |         |
| 01:9606  | 1119 NM_001456 FLNA Homo_sapiens               |  |  |  |  | R--AVPSPR                                                    |         |
| 04:9913  | 1119 NM_001206514 FLNA Bos_taurus              |  |  |  |  | AAAG--RPQGEQ                                                 |         |
| 06:10116 | 1119 NM_001134599 Flna Rattus_norvegicus       |  |  |  |  | LKG--RPIGE                                                   |         |
| 07:10090 | 1119 NM_001290421 Flna Mus_musculus            |  |  |  |  |                                                              |         |
| 07:10090 | 1119 NM_010227 Flna Mus_musculus               |  |  |  |  | --LKG--RPIGE-                                                |         |
| 08:9031  | 1119 NM_204574 FLNA Gallus_gallus              |  |  |  |  |                                                              | -GPNSNP |
| 12:7227  | 1119 NM_001144595 cher Drosophila_melanogaster |  |  |  |  |                                                              |         |
| 12:7227  | 1119 NM_001202309 cher Drosophila_melanogaster |  |  |  |  |                                                              |         |
| 12:7227  | 1119 NM_001275727 cher Drosophila_melanogaster |  |  |  |  |                                                              |         |
| 12:7227  | 1119 NM_001275728 cher Drosophila_melanogaster |  |  |  |  | PGSANLTHGGELVQNANYTNGQTQTATIFLSNNNNSNSTGNHYYNNSNSHGRKNAPNSQQ |         |
| 12:7227  | 1119 NM_001275729 cher Drosophila_melanogaster |  |  |  |  |                                                              |         |
| 12:7227  | 1119 NM_001275730 cher Drosophila_melanogaster |  |  |  |  | PGSANLTHGGELVQNANYTNGQTQTATIFLSNNNNSNSTGNHYYNNSNSHGRKNAPNSQQ |         |
| 12:7227  | 1119 NM_079659 cher Drosophila_melanogaster    |  |  |  |  | PGSANLTHGGELVQNANYTNGQTQTATIFLSNNNNSNSTGNHYYNNSNSHGRKNAPNSQQ |         |
| 12:7227  | 1119 NM_169746 cher Drosophila_melanogaster    |  |  |  |  |                                                              |         |
| 12:7227  | 1119 NM_169747 cher Drosophila_melanogaster    |  |  |  |  |                                                              |         |
| 12:7227  | 1119 NM_206502 cher Drosophila_melanogaster    |  |  |  |  | PGSANLTHGGELVQNANYTNGQTQTATIFLSNNNNSNSTGNHYYNNSNSHGRKNAPNSQQ |         |
| 13:6239  | 1119 NM_001028379 fln-1 Caenorhabditis_elegans |  |  |  |  |                                                              |         |
| 13:6239  | 1119 NM_001028380 fln-1 Caenorhabditis_elegans |  |  |  |  |                                                              |         |
| 13:6239  | 1119 NM_001038368 fln-1 Caenorhabditis_elegans |  |  |  |  |                                                              |         |
| 13:6239  | 1119 NM_001129351 fln-1 Caenorhabditis_elegans |  |  |  |  |                                                              |         |
| 13:6239  | 1119 NM_001268291 fln-1 Caenorhabditis_elegans |  |  |  |  |                                                              |         |
| 13:6239  | 1119 NM_001268292 fln-1 Caenorhabditis_elegans |  |  |  |  |                                                              |         |
| 13:6239  | 1119 NM_001268293 fln-1 Caenorhabditis_elegans |  |  |  |  |                                                              |         |
| 13:6239  | 1119 NM_001307431 fln-1 Caenorhabditis_elegans |  |  |  |  |                                                              |         |
| 13:6239  | 1119 NM_001307432 fln-1 Caenorhabditis_elegans |  |  |  |  |                                                              |         |
| 13:6239  | 1119 NM_001307433 fln-1 Caenorhabditis_elegans |  |  |  |  |                                                              |         |
| 13:6239  | 1119 NM_001307434 fln-1 Caenorhabditis_elegans |  |  |  |  |                                                              |         |
| 13:6239  | 1119 NM_001307435 fln-1 Caenorhabditis_elegans |  |  |  |  |                                                              |         |
| 13:6239  | 1119 NM_001307436 fln-1 Caenorhabditis_elegans |  |  |  |  |                                                              |         |
| 13:6239  | 1119 NM_001307437 fln-1 Caenorhabditis_elegans |  |  |  |  |                                                              |         |
| 13:6239  | 1119 NM_001307438 fln-1 Caenorhabditis_elegans |  |  |  |  |                                                              |         |
| 13:6239  | 1119 NM_001307439 fln-1 Caenorhabditis_elegans |  |  |  |  |                                                              |         |
| 13:6239  | 1119 NM_001307440 fln-1 Caenorhabditis_elegans |  |  |  |  |                                                              |         |
| 13:6239  | 1119 NM_001307441 fln-1 Caenorhabditis_elegans |  |  |  |  |                                                              |         |
| 13:6239  | 1119 NM_001307442 fln-1 Caenorhabditis_elegans |  |  |  |  |                                                              |         |
| 13:6239  | 1119 NM_001307443 fln-1 Caenorhabditis_elegans |  |  |  |  |                                                              |         |

|          |  |               |  |                 |                              |
|----------|--|---------------|--|-----------------|------------------------------|
| 00:1     |  | Ac-MQHRPPGFSR |  |                 |                              |
| 01:9606  |  | 1119          |  | 0HNP_0011104026 | FLNA Homo_sapiens            |
| 01:9606  |  | 1119          |  | 0HNP_0011447    | FLNA Homo_sapiens            |
| 01:9606  |  | 1119          |  | NM_001110556    | FLNA Homo_sapiens            |
| 01:9606  |  | 1119          |  | NM_001456       | FLNA Homo_sapiens            |
| 04:9913  |  | 1119          |  | NM_001206514    | FLNA Bos_taurus              |
| 06:10116 |  | 1119          |  | NM_001134599    | Flna Rattus_norvegicus       |
| 07:10090 |  | 1119          |  | NM_001290421    | Flna Mus_musculus            |
| 07:10090 |  | 1119          |  | NM_010227       | Flna Mus_musculus            |
| 08:9031  |  | 1119          |  | NM_204574       | FLNA Gallus_gallus           |
| 12:7227  |  | 1119          |  | NM_001144595    | cher Drosophila_melanogaster |
| 12:7227  |  | 1119          |  | NM_001202309    | cher Drosophila_melanogaster |
| 12:7227  |  | 1119          |  | NM_001275727    | cher Drosophila_melanogaster |
| 12:7227  |  | 1119          |  | NM_001275728    | cher Drosophila_melanogaster |
| 12:7227  |  | 1119          |  | NM_001275729    | cher Drosophila_melanogaster |
| 12:7227  |  | 1119          |  | NM_001275730    | cher Drosophila_melanogaster |
| 12:7227  |  | 1119          |  | NM_0079659      | cher Drosophila_melanogaster |
| 12:7227  |  | 1119          |  | NM_169746       | cher Drosophila_melanogaster |
| 12:7227  |  | 1119          |  | NM_169747       | cher Drosophila_melanogaster |
| 12:7227  |  | 1119          |  | NM_206502       | cher Drosophila_melanogaster |
| 13:6239  |  | 1119          |  | NM_001028379    | fln-1 Caenorhabditis_elegans |
| 13:6239  |  | 1119          |  | NM_001028380    | fln-1 Caenorhabditis_elegans |
| 13:6239  |  | 1119          |  | NM_001038368    | fln-1 Caenorhabditis_elegans |
| 13:6239  |  | 1119          |  | NM_001129351    | fln-1 Caenorhabditis_elegans |
| 13:6239  |  | 1119          |  | NM_001268291    | fln-1 Caenorhabditis_elegans |
| 13:6239  |  | 1119          |  | NM_001268292    | fln-1 Caenorhabditis_elegans |
| 13:6239  |  | 1119          |  | NM_001268293    | fln-1 Caenorhabditis_elegans |
| 13:6239  |  | 1119          |  | NM_001307431    | fln-1 Caenorhabditis_elegans |
| 13:6239  |  | 1119          |  | NM_001307432    | fln-1 Caenorhabditis_elegans |
| 13:6239  |  | 1119          |  | NM_001307433    | fln-1 Caenorhabditis_elegans |
| 13:6239  |  | 1119          |  | NM_001307434    | fln-1 Caenorhabditis_elegans |
| 13:6239  |  | 1119          |  | NM_001307435    | fln-1 Caenorhabditis_elegans |
| 13:6239  |  | 1119          |  | NM_001307436    | fln-1 Caenorhabditis_elegans |
| 13:6239  |  | 1119          |  | NM_001307437    | fln-1 Caenorhabditis_elegans |
| 13:6239  |  | 1119          |  | NM_001307438    | fln-1 Caenorhabditis_elegans |
| 13:6239  |  | 1119          |  | NM_001307439    | fln-1 Caenorhabditis_elegans |
| 13:6239  |  | 1119          |  | NM_001307440    | fln-1 Caenorhabditis_elegans |
| 13:6239  |  | 1119          |  | NM_001307441    | fln-1 Caenorhabditis_elegans |
| 13:6239  |  | 1119          |  | NM_001307442    | fln-1 Caenorhabditis_elegans |
| 13:6239  |  | 1119          |  | NM_001307443    | fln-1 Caenorhabditis_elegans |

[illegible]



|         |      |                |      |              |
|---------|------|----------------|------|--------------|
| 01:9606 | 1119 | 0#NP_001104026 | FLNA | Homo_sapiens |
| 01:9606 | 1119 | 0#NP_001447    | FLNA | Homo_sapiens |
| 01:9606 | 1119 | NM_001110556   | FLNA | Homo_sapiens |
| 01:9606 | 1119 | NM_001456      | FLNA | Homo_sapiens |

-----A  
 TRSAGQGGEVLVYVEDPAGHQEEAKVTANNDKNRTFSVWYVPEVTGTHKVTVLF-----A  
 TRSAGQGGEVLVYVEDPAGHQEEAKVTANNDKNRTFSVWYVPEVTGTHKVTVLF-----A  
 TRSAGQGGEVLVYVEDPAGHQEEAKVTANNDKNRTFSVWYVPEVTGTHKVTVLF-----A  
 TRSAGQGEVLVYVEDPAGHQEEAKVTANNDKNRTFSVWYVPEVTGTHKVTVLF-----A

|          |      |                |       |                         |
|----------|------|----------------|-------|-------------------------|
| 01:9606  | 1119 | 0HNP_001104026 | FLNA  | Homo_sapiens            |
| 01:9606  | 1119 | 0HNP_0011447   | FLNA  | Homo_sapiens            |
| 01:9606  | 1119 | NM_001110556   | FLNA  | Homo_sapiens            |
| 01:9606  | 1119 | NM_001456      | FLNA  | Homo_sapiens            |
| 04:9913  | 1119 | NM_001206514   | FLNA  | Bos_taurus              |
| 06:10116 | 1119 | NM_001134599   | Flna  | Rattus_norvegicus       |
| 07:10090 | 1119 | NM_001290421   | Flna  | Mus_musculus            |
| 07:10090 | 1119 | NM_010227      | Flna  | Mus_musculus            |
| 08:9031  | 1119 | NM_204574      | FLNA  | Gallus_gallus           |
| 12:7227  | 1119 | NM_001144595   | cher  | Drosophila_melanogaster |
| 12:7227  | 1119 | NM_001202309   | cher  | Drosophila_melanogaster |
| 12:7227  | 1119 | NM_001275727   | cher  | Drosophila_melanogaster |
| 12:7227  | 1119 | NM_001275728   | cher  | Drosophila_melanogaster |
| 12:7227  | 1119 | NM_001275729   | cher  | Drosophila_melanogaster |
| 12:7227  | 1119 | NM_001275730   | cher  | Drosophila_melanogaster |
| 12:7227  | 1119 | NM_079659      | cher  | Drosophila_melanogaster |
| 12:7227  | 1119 | NM_169746      | cher  | Drosophila_melanogaster |
| 12:7227  | 1119 | NM_169747      | cher  | Drosophila_melanogaster |
| 12:7227  | 1119 | NM_206502      | cher  | Drosophila_melanogaster |
| 13:6239  | 1119 | NM_001028379   | fln-1 | Caenorhabditis_elegans  |
| 13:6239  | 1119 | NM_001028380   | fln-1 | Caenorhabditis_elegans  |
| 13:6239  | 1119 | NM_001038368   | fln-1 | Caenorhabditis_elegans  |
| 13:6239  | 1119 | NM_001129351   | fln-1 | Caenorhabditis_elegans  |
| 13:6239  | 1119 | NM_001268291   | fln-1 | Caenorhabditis_elegans  |
| 13:6239  | 1119 | NM_001268292   | fln-1 | Caenorhabditis_elegans  |
| 13:6239  | 1119 | NM_001268293   | fln-1 | Caenorhabditis_elegans  |
| 13:6239  | 1119 | NM_001307431   | fln-1 | Caenorhabditis_elegans  |
| 13:6239  | 1119 | NM_001307432   | fln-1 | Caenorhabditis_elegans  |
| 13:6239  | 1119 | NM_001307433   | fln-1 | Caenorhabditis_elegans  |
| 13:6239  | 1119 | NM_001307434   | fln-1 | Caenorhabditis_elegans  |
| 13:6239  | 1119 | NM_001307435   | fln-1 | Caenorhabditis_elegans  |
| 13:6239  | 1119 | NM_001307436   | fln-1 | Caenorhabditis_elegans  |
| 13:6239  | 1119 | NM_001307437   | fln-1 | Caenorhabditis_elegans  |
| 13:6239  | 1119 | NM_001307438   | fln-1 | Caenorhabditis_elegans  |
| 13:6239  | 1119 | NM_001307439   | fln-1 | Caenorhabditis_elegans  |
| 13:6239  | 1119 | NM_001307440   | fln-1 | Caenorhabditis_elegans  |
| 13:6239  | 1119 | NM_001307441   | fln-1 | Caenorhabditis_elegans  |
| 13:6239  | 1119 | NM_001307442   | fln-1 | Caenorhabditis_elegans  |
| 13:6239  | 1119 | NM_001307443   | fln-1 | Caenorhabditis_elegans  |

|          |      |                 |      |                   |
|----------|------|-----------------|------|-------------------|
| 01:9606  | 1119 | 0#NHP_001104026 | FLNA | Homo_sapiens      |
| 01:9606  | 1119 | 0#NHP_001447    | FLNA | Homo_sapiens      |
| 01:9606  | 1119 | NM_001110556    | FLNA | Homo_sapiens      |
| 01:9606  | 1119 | NM_001456       | FLNA | Homo_sapiens      |
| 04:9913  | 1119 | NM_001206514    | FLNA | Bos_taurus        |
| 06:10116 | 1119 | NM_001134599    | FLNA | Rattus_norvegicus |

[illegible][illegible][illegible]

```
00:01|Ac-MQHRPPGFSR
01:9606|1119|0HNP_001104026|FLNA|Homo_sapiens
01:9606|1119|0HNP_0011447|FLNA|Homo_sapiens
01:9606|1119|NM_001110556|FLNA|Homo_sapiens
01:9606|1119|NM_001456|FLNA|Homo_sapiens
04:9913|1119|NM_001206514|FLNA|Bos_taurus
06:10116|1119|NM_001134599|Flna|Rattus_norvegicus
07:10090|1119|NM_001290421|Flna|Mus_musculus
07:10090|1119|NM_010227|Flna|Mus_musculus
```

DGVGFGFEYPMV-PGTYIVTITWGGQINIGRSPFEVKVGTECGNQKVRWAGPGLGGVVGK  
 DGVGFGFEYPMV-PGTYIVTITWGGQINIGRSPFEVKVGTECGNQKVRWAGPGLGGVVGK  
 DGVGFGFEYPMV-PGTYIVTITWGGQINIGRSPFEVKVGTECGNQKVRWAGPGLGGVVGK  
 DGVGFGFEYPMV-PGTYIVTITWGGQINIGRSPFEVKVGTECGNQKVRWAGPGLGGVVGK  
 DGVGFGFEYPMI-PGTYTIVTITWGGQINIGRSPFEVKVGTECGNQKVRWAGPGLGGVVGK  
 DGVGFGFEYPTI-PGTYTIVTITWGGQINIGRSPFEVKVGTECGNQKVRWAGPGLGGIVGK  
 DGVGFGFEYPTI-PGTYTIVTITWGGQINIGRSPFEVKVGTECGNQKVRWAGPGLGGIVGK  
 DGVGFGFEYPTI-PGTYTIVTITWGGQINIGRSPFEVKVGTECGNQKVRWAGPGLGGIVGK



```
00:1|Ac-MQHRPPGFSR
01:9606|1119|0#NP_001104026|FLNA|Homo_sapiens
01:9606|1119|0#NP_0011447|FLNA|Homo_sapiens
01:9606|1119|NM_00110556|FLNA|Homo_sapiens
01:9606|1119|NM_001456|FLNA|Homo_sapiens
04:9913|1119|NM_001206514|FLNA|Bos_taurus
06:10116|1119|NM_001134599|Flna|Rattus_norvegicus
07:10090|1119|NM_001290421|Flna|Mus_musculus
07:10090|1119|NM_010227|Flna|Mus_musculus
08:9031|1119|NM_204574|FLNA|Gallus_gallus
12:7227|1119|NM_001144595|cher|Drosophila_melanogaster
12:7227|1119|NM_001202309|cher|Drosophila_melanogaster
12:7227|1119|NM_001275727|cher|Drosophila_melanogaster
```

[illegible]

QAFGPWLQ-PGVRPNAATHFNVDAREAG-----



|         |      |              |       |                         |                                                        |
|---------|------|--------------|-------|-------------------------|--------------------------------------------------------|
| 12:7227 | 1119 | NM_001275730 | cher  | Drosophila_melanogaster | -----DAELKVKIIHEET-KIEVPCRIIDNEDNTYSVEVIPPSKGYATTMTTYG |
| 12:7227 | 1119 | NM_079659    | cher  | Drosophila_melanogaster | -----DAELKVKIIHEET-KIEVPCRIIDNEDNTYSVEVIPPSKGYATTMTTYG |
| 12:7227 | 1119 | NM_169746    | cher  | Drosophila_melanogaster | -----                                                  |
| 12:7227 | 1119 | NM_169747    | cher  | Drosophila_melanogaster | -----                                                  |
| 12:7227 | 1119 | NM_206502    | cher  | Drosophila_melanogaster | -----DAELKVKIIHEET-KIEVPCRIIDNEDNTYSVEVIPPSKGYATTMTTYG |
| 13:6239 | 1119 | NM_001028379 | fln-1 | Caenorhabditis_elegans  | -----GENVDLDVLDNQDGSFTVKYTAQRPGAYQLNVVFA               |
| 13:6239 | 1119 | NM_001028380 | fln-1 | Caenorhabditis_elegans  | -----GENVDLDVLDNQDGSFTVKYTAQRPGAYQLNVVFA               |
| 13:6239 | 1119 | NM_001038368 | fln-1 | Caenorhabditis_elegans  | -----                                                  |
| 13:6239 | 1119 | NM_001129351 | fln-1 | Caenorhabditis_elegans  | -----                                                  |
| 13:6239 | 1119 | NM_001268291 | fln-1 | Caenorhabditis_elegans  | -----GENVDLDVLDNQDGSFTVKYTAQRPGAYQLNVVFA               |
| 13:6239 | 1119 | NM_001268292 | fln-1 | Caenorhabditis_elegans  | -----GENVDLDVLDNQDGSFTVKYTAQRPGAYQLNVVFA               |
| 13:6239 | 1119 | NM_001268293 | fln-1 | Caenorhabditis_elegans  | -----                                                  |
| 13:6239 | 1119 | NM_001307431 | fln-1 | Caenorhabditis_elegans  | -----GENVDLDVLDNQDGSFTVKYTAQRPGAYQLNVVFA               |
| 13:6239 | 1119 | NM_001307432 | fln-1 | Caenorhabditis_elegans  | -----GENVDLDVLDNQDGSFTVKYTAQRPGAYQLNVVFA               |
| 13:6239 | 1119 | NM_001307433 | fln-1 | Caenorhabditis_elegans  | -----GENVDLDVLDNQDGSFTVKYTAQRPGAYQLNVVFA               |
| 13:6239 | 1119 | NM_001307434 | fln-1 | Caenorhabditis_elegans  | -----GENVDLDVLDNQDGSFTVKYTAQRPGAYQLNVVFA               |
| 13:6239 | 1119 | NM_001307435 | fln-1 | Caenorhabditis_elegans  | -----GENVDLDVLDNQDGSFTVKYTAQRPGAYQLNVVFA               |
| 13:6239 | 1119 | NM_001307436 | fln-1 | Caenorhabditis_elegans  | -----GENVDLDVLDNQDGSFTVKYTAQRPGAYQLNVVFA               |
| 13:6239 | 1119 | NM_001307437 | fln-1 | Caenorhabditis_elegans  | -----GENVDLDVLDNQDGSFTVKYTAQRPGAYQLNVVFA               |
| 13:6239 | 1119 | NM_001307438 | fln-1 | Caenorhabditis_elegans  | -----GENVDLDVLDNQDGSFTVKYTAQRPGAYQLNVVFA               |
| 13:6239 | 1119 | NM_001307439 | fln-1 | Caenorhabditis_elegans  | -----GENVDLDVLDNQDGSFTVKYTAQRPGAYQLNVVFA               |
| 13:6239 | 1119 | NM_001307440 | fln-1 | Caenorhabditis_elegans  | -----GENVDLDVLDNQDGSFTVKYTAQRPGAYQLNVVFA               |
| 13:6239 | 1119 | NM_001307441 | fln-1 | Caenorhabditis_elegans  | -----GENVDLDVLDNQDGSFTVKYTAQRPGAYQLNVVFA               |
| 13:6239 | 1119 | NM_001307442 | fln-1 | Caenorhabditis_elegans  | -----GENVDLDVLDNQDGSFTVKYTAQRPGAYQLNVVFA               |
| 13:6239 | 1119 | NM_001307443 | fln-1 | Caenorhabditis_elegans  | -----GENVDLDVLDNQDGSFTVKYTAQRPGAYQLNVVFA               |

|          |               |                |       |                         |                                                               |
|----------|---------------|----------------|-------|-------------------------|---------------------------------------------------------------|
| 00:1     | Ac-MQHRPPGFSR |                |       |                         |                                                               |
| 01:9606  | 1119          | 0#NP_001104026 | FLNA  | Homo_sapiens            | GDPIPKSPFSAVAVSPSLDSLKIKVSGLGEKVDV-GKDQEFVTKSKGAGGQGVASKIVGP  |
| 01:9606  | 1119          | 0#NP_0011447   | FLNA  | Homo_sapiens            | GDPIPKSPFSAVAVSPSLDSLKIKVSGLGEKVDV-GKDQEFVTKSKGAGGQGVASKIVGP  |
| 01:9606  | 1119          | NM_001110556   | FLNA  | Homo_sapiens            | GDPIPKSPFSAVAVSPSLDSLKIKVSGLGEKVDV-GKDQEFVTKSKGAGGQGVASKIVGP  |
| 01:9606  | 1119          | NM_001456      | FLNA  | Homo_sapiens            | GDPIPKSPFSAVAVSPSLDSLKIKVSGLGEKVDV-GKDQEFVTKSKGAGGQGVASKIVGP  |
| 04:9913  | 1119          | NM_001206514   | FLNA  | Bos_taurus              | GDAIPKSPFSVGVSPSLDSLKIKVSGLGEKVDV-GKDQEFVTKSKGAGGQGVASKIVGP   |
| 06:10116 | 1119          | NM_001134599   | Flna  | Rattus_norvegicus       | GDHIPKSPFSVGVSPSLDSLKIKVSGLGDVKVDV-GKDQEFVTKSKGAGGQGVASKIVSP  |
| 07:10090 | 1119          | NM_001290421   | Flna  | Mus_musculus            | GDHIPKSPFSVGVSPSLDSLKIKVSGLGDVKVDV-GKDQEFVTKSKGAGGQGVASKIVSP  |
| 07:10090 | 1119          | NM_010227      | Flna  | Mus_musculus            | GDHIPKSPFSVGVSPSLDSLKIKVSGLGDVKVDV-GKDQEFVTKSKGAGGQGVASKIVSP  |
| 08:9031  | 1119          | NM_204574      | FLNA  | Gallus_gallus           | GDPIPKSPFGVTVPSPAVELGRKIKISGLDDKLEV-GKEQEFVTKAKGAGGQGVGARIVGP |
| 12:7227  | 1119          | NM_001144595   | cher  | Drosophila_melanogaster | -----                                                         |
| 12:7227  | 1119          | NM_001202309   | cher  | Drosophila_melanogaster | -----                                                         |
| 12:7227  | 1119          | NM_001275727   | cher  | Drosophila_melanogaster | -----                                                         |
| 12:7227  | 1119          | NM_001275728   | cher  | Drosophila_melanogaster | -----                                                         |
| 12:7227  | 1119          | NM_001275729   | cher  | Drosophila_melanogaster | -----                                                         |
| 12:7227  | 1119          | NM_001275730   | cher  | Drosophila_melanogaster | -----                                                         |
| 12:7227  | 1119          | NM_079659      | cher  | Drosophila_melanogaster | -----                                                         |
| 12:7227  | 1119          | NM_169746      | cher  | Drosophila_melanogaster | -----                                                         |
| 12:7227  | 1119          | NM_169747      | cher  | Drosophila_melanogaster | -----                                                         |
| 12:7227  | 1119          | NM_206502      | cher  | Drosophila_melanogaster | -----                                                         |
| 13:6239  | 1119          | NM_001028379   | fln-1 | Caenorhabditis_elegans  | -----                                                         |
| 13:6239  | 1119          | NM_001028380   | fln-1 | Caenorhabditis_elegans  | -----                                                         |
| 13:6239  | 1119          | NM_001038368   | fln-1 | Caenorhabditis_elegans  | -----                                                         |
| 13:6239  | 1119          | NM_001129351   | fln-1 | Caenorhabditis_elegans  | -----                                                         |
| 13:6239  | 1119          | NM_001268291   | fln-1 | Caenorhabditis_elegans  | -----                                                         |
| 13:6239  | 1119          | NM_001268292   | fln-1 | Caenorhabditis_elegans  | -----                                                         |
| 13:6239  | 1119          | NM_001268293   | fln-1 | Caenorhabditis_elegans  | -----                                                         |
| 13:6239  | 1119          | NM_001307431   | fln-1 | Caenorhabditis_elegans  | -----                                                         |
| 13:6239  | 1119          | NM_001307432   | fln-1 | Caenorhabditis_elegans  | -----                                                         |
| 13:6239  | 1119          | NM_001307433   | fln-1 | Caenorhabditis_elegans  | -----                                                         |
| 13:6239  | 1119          | NM_001307434   | fln-1 | Caenorhabditis_elegans  | -----                                                         |
| 13:6239  | 1119          | NM_001307435   | fln-1 | Caenorhabditis_elegans  | -----                                                         |
| 13:6239  | 1119          | NM_001307436   | fln-1 | Caenorhabditis_elegans  | -----                                                         |
| 13:6239  | 1119          | NM_001307437   | fln-1 | Caenorhabditis_elegans  | -----                                                         |
| 13:6239  | 1119          | NM_001307438   | fln-1 | Caenorhabditis_elegans  | -----                                                         |
| 13:6239  | 1119          | NM_001307439   | fln-1 | Caenorhabditis_elegans  | -----                                                         |
| 13:6239  | 1119          | NM_001307440   | fln-1 | Caenorhabditis_elegans  | -----                                                         |
| 13:6239  | 1119          | NM_001307441   | fln-1 | Caenorhabditis_elegans  | -----                                                         |
| 13:6239  | 1119          | NM_001307442   | fln-1 | Caenorhabditis_elegans  | -----                                                         |
| 13:6239  | 1119          | NM_001307443   | fln-1 | Caenorhabditis_elegans  | -----                                                         |

|          |               |                |      |                         |                                                        |
|----------|---------------|----------------|------|-------------------------|--------------------------------------------------------|
| 00:1     | Ac-MQHRPPGFSR |                |      |                         |                                                        |
| 01:9606  | 1119          | 0#NP_001104026 | FLNA | Homo_sapiens            | SGAAVPCKVEPGLGADNSVVRF-----LPREEGPYEVEVTYDGVVPVPGSPFFL |
| 01:9606  | 1119          | 0#NP_0011447   | FLNA | Homo_sapiens            | SGAAVPCKVEPGLGADNSVVRF-----LPREEGPYEVEVTYDGVVPVPGSPFFL |
| 01:9606  | 1119          | NM_001110556   | FLNA | Homo_sapiens            | SGAAVPCKVEPGLGADNSVVRF-----LPREEGPYEVEVTYDGVVPVPGSPFFL |
| 01:9606  | 1119          | NM_001456      | FLNA | Homo_sapiens            | SGAAVPCKVEPGLGADNSVVRF-----LPREEGPYEVEVTYDGVVPVPGSPFFL |
| 04:9913  | 1119          | NM_001206514   | FLNA | Bos_taurus              | SGAAVPCKVEPGLGADNSVVRF-----VPREEGPYEVEVTYDGVVPVPGSPFFL |
| 06:10116 | 1119          | NM_001134599   | Flna | Rattus_norvegicus       | SGAAVPCKVEPGLGADNSVVRF-----VPREEGPYEVEVTYDGVVPVPGSPFFV |
| 07:10090 | 1119          | NM_001290421   | Flna | Mus_musculus            | SGAAVPCKVEPGLGADNSVVRF-----VPREEGPYEVEVTYDGVVPVPGSPFFL |
| 07:10090 | 1119          | NM_010227      | Flna | Mus_musculus            | SGAAVPCKVEPGLGADNSVVRF-----VPREEGPYEVEVTYDGVVPVPGSPFFL |
| 08:9031  | 1119          | NM_204574      | FLNA | Gallus_gallus           | THKAVPCRVEAGPGAESSVVRW-----TAPHEGPYEVEVTYDGHVPVPGSPFFV |
| 12:7227  | 1119          | NM_001144595   | cher | Drosophila_melanogaster | -----                                                  |
| 12:7227  | 1119          | NM_001202309   | cher | Drosophila_melanogaster | -----                                                  |
| 12:7227  | 1119          | NM_001275727   | cher | Drosophila_melanogaster | -----                                                  |
| 12:7227  | 1119          | NM_001275728   | cher | Drosophila_melanogaster | -----                                                  |
| 12:7227  | 1119          | NM_001275729   | cher | Drosophila_melanogaster | -----                                                  |
| 12:7227  | 1119          | NM_001275730   | cher | Drosophila_melanogaster | -----                                                  |
| 12:7227  | 1119          | NM_079659      | cher | Drosophila_melanogaster | -----                                                  |

|          |      |                |      |                         |
|----------|------|----------------|------|-------------------------|
| 01:9606  | 1119 | 0#NP_001104026 | FLNA | Homo_sapiens            |
| 01:9606  | 1119 | 0#NP_001447    | FLNA | Homo_sapiens            |
| 01:9606  | 1119 | NM_001110556   | FLNA | Homo_sapiens            |
| 01:9606  | 1119 | NM_001456      | FLNA | Homo_sapiens            |
| 04:9913  | 1119 | NM_001206514   | FLNA | Bos_taurus              |
| 06:10116 | 1119 | NM_001134599   | Flna | Rattus_norvegicus       |
| 07:10090 | 1119 | NM_001290421   | Flna | Mus_musculus            |
| 07:10090 | 1119 | NM_010227      | Flna | Mus_musculus            |
| 08:9031  | 1119 | NM_204574      | FLNA | Gallus_gallus           |
| 12:7227  | 1119 | NM_001144595   | cher | Drosophila_melanogaster |
| 12:7227  | 1119 | NM_001202309   | cher | Drosophila_melanogaster |
| 12:7227  | 1119 | NM_001275727   | cher | Drosophila_melanogaster |
| 12:7227  | 1119 | NM_001275728   | cher | Drosophila_melanogaster |
| 12:7227  | 1119 | NM_001275729   | cher | Drosophila_melanogaster |
| 12:7227  | 1119 | NM_001275730   | cher | Drosophila_melanogaster |
| 12:7227  | 1119 | NM_079659      | cher | Drosophila_melanogaster |
| 12:7227  | 1119 | NM_169746      | cher | Drosophila_melanogaster |
| 12:7227  | 1119 | NM_169747      | cher | Drosophila_melanogaster |

PAEFMIDTRGAGQGGLGVTVEGPCEAAINCRDNGDGT CNVAYLPTEAGDYTVNITFNE--  
 PAEFMIDTRGAGQGGLGVTVEGPCEAAINCRDNGDGT CNVAYLPTEAGDYTVNITFNE--  
 PAEFMIDTRGAGQGGLGVTVEGPCEAAINCRDNGDGT CNVAYLPTEAGDYTVNITFNE--



|         |      |              |       |                        |       |
|---------|------|--------------|-------|------------------------|-------|
| 13:6239 | 1119 | NM_001028380 | fln-1 | Caenorhabditis_elegans | ----- |
| 13:6239 | 1119 | NM_001038368 | fln-1 | Caenorhabditis_elegans | ----- |
| 13:6239 | 1119 | NM_001129351 | fln-1 | Caenorhabditis_elegans | ----- |
| 13:6239 | 1119 | NM_001268291 | fln-1 | Caenorhabditis_elegans | ----- |
| 13:6239 | 1119 | NM_001268292 | fln-1 | Caenorhabditis_elegans | ----- |
| 13:6239 | 1119 | NM_001268293 | fln-1 | Caenorhabditis_elegans | ----- |
| 13:6239 | 1119 | NM_001307431 | fln-1 | Caenorhabditis_elegans | ----- |
| 13:6239 | 1119 | NM_001307432 | fln-1 | Caenorhabditis_elegans | ----- |
| 13:6239 | 1119 | NM_001307433 | fln-1 | Caenorhabditis_elegans | ----- |
| 13:6239 | 1119 | NM_001307434 | fln-1 | Caenorhabditis_elegans | ----- |
| 13:6239 | 1119 | NM_001307435 | fln-1 | Caenorhabditis_elegans | ----- |
| 13:6239 | 1119 | NM_001307436 | fln-1 | Caenorhabditis_elegans | ----- |
| 13:6239 | 1119 | NM_001307437 | fln-1 | Caenorhabditis_elegans | ----- |
| 13:6239 | 1119 | NM_001307438 | fln-1 | Caenorhabditis_elegans | ----- |
| 13:6239 | 1119 | NM_001307439 | fln-1 | Caenorhabditis_elegans | ----- |
| 13:6239 | 1119 | NM_001307440 | fln-1 | Caenorhabditis_elegans | ----- |
| 13:6239 | 1119 | NM_001307441 | fln-1 | Caenorhabditis_elegans | ----- |
| 13:6239 | 1119 | NM_001307442 | fln-1 | Caenorhabditis_elegans | ----- |
| 13:6239 | 1119 | NM_001307443 | fln-1 | Caenorhabditis_elegans | ----- |

|          |               |                |       |                         |                                                             |
|----------|---------------|----------------|-------|-------------------------|-------------------------------------------------------------|
| 00:1     | Ac-MQHRPPGFSR |                |       |                         |                                                             |
| 01:9606  | 1119          | 0#NP_001104026 | FLNA  | Homo_sapiens            | YGPGIEGQGVFREATTESVDARALTQTG-GPHVKARVANPSGN-LTETYVQDRGDGMKY |
| 01:9606  | 1119          | 0#NP_001447    | FLNA  | Homo_sapiens            | YGPGIEGQGVFREATTESVDARALTQTG-GPHVKARVANPSGN-LTETYVQDRGDGMKY |
| 01:9606  | 1119          | NM_001110556   | FLNA  | Homo_sapiens            | YGPGIEGQGVFREATTESVDARALTQTG-GPHVKARVANPSGN-LTETYVQDRGDGMKY |
| 01:9606  | 1119          | NM_001456      | FLNA  | Homo_sapiens            | YGPGIEGQGVFREATTESVDARALTQTG-GPHVKARVANPSGN-LTETYVQDRGDGMKY |
| 04:9913  | 1119          | NM_001206514   | FLNA  | Bos_taurus              | YGPGIEGQGVFREATTESVDARALTQTG-GPHVKARVANPSGN-LTETYVQDCGDGTYY |
| 06:10116 | 1119          | NM_001134599   | Flna  | Rattus_norvegicus       | YGPGIEGQGVFREATTESVDARALTQTG-GPHVKARVANPSGN-LTDTYVQDCGDGTYY |
| 07:10090 | 1119          | NM_001290421   | Flna  | Mus_musculus            | YGPGIEGQGVFREATTESVDARALTQTG-GPHVKARVANPSGN-LTDTYVQDCGDGTYY |
| 07:10090 | 1119          | NM_010227      | Flna  | Mus_musculus            | YGPGIEGQGVFREATTESVDARALTQTG-GPHVKARVANPSGN-LTDTYVQDCGDGTYY |
| 08:9031  | 1119          | NM_204574      | FLNA  | Gallus_gallus           | YGPVGEKGVFRGALTHFEVDARALGAAG-GAAVTARIRKPSGG-GVEAAVEDRGDGTYY |
| 12:7227  | 1119          | NM_001144595   | cher  | Drosophila_melanogaster | -----                                                       |
| 12:7227  | 1119          | NM_001202309   | cher  | Drosophila_melanogaster | -----VIMNAATDFMVDMSKVGSNIDSGKLSCAIFDPMGHVLPISKIVQGPTDDIFR   |
| 12:7227  | 1119          | NM_001275727   | cher  | Drosophila_melanogaster | -----                                                       |
| 12:7227  | 1119          | NM_001275728   | cher  | Drosophila_melanogaster | -----HGVMNAATDFMVDMSKVGSNIDSGKLSCAIFDPMGHVLPISKIVQGPTDDIFR  |
| 12:7227  | 1119          | NM_001275729   | cher  | Drosophila_melanogaster | -----HGVMNAATDFMVDMSKVGSNIDSGKLSCAIFDPMGHVLPISKIVQGPTDDIFR  |
| 12:7227  | 1119          | NM_001275730   | cher  | Drosophila_melanogaster | -----HGVMNAATDFMVDMSKVGSNIDSGKLSCAIFDPMGHVLPISKIVQGPTDDIFR  |
| 12:7227  | 1119          | NM_079659      | cher  | Drosophila_melanogaster | -----VIMNAATDFMVDMSKVGSNIDSGKLSCAIFDPMGHVLPISKIVQGPTDDIFR   |
| 12:7227  | 1119          | NM_169746      | cher  | Drosophila_melanogaster | -----                                                       |
| 12:7227  | 1119          | NM_169747      | cher  | Drosophila_melanogaster | -----                                                       |
| 12:7227  | 1119          | NM_206502      | cher  | Drosophila_melanogaster | -----HGVMNAATDFMVDMSKVGSNIDSGKLSCAIFDPMGHVLPISKIVQGPTDDIFR  |
| 13:6239  | 1119          | NM_001028379   | fln-1 | Caenorhabditis_elegans  | -----DFAQLQPVVSRSPSNPRHHNVRFPVPSGKPN-----                   |
| 13:6239  | 1119          | NM_001028380   | fln-1 | Caenorhabditis_elegans  | -----TPNPNPQACT-----                                        |
| 13:6239  | 1119          | NM_001038368   | fln-1 | Caenorhabditis_elegans  | -----                                                       |
| 13:6239  | 1119          | NM_001129351   | fln-1 | Caenorhabditis_elegans  | -----                                                       |
| 13:6239  | 1119          | NM_001268291   | fln-1 | Caenorhabditis_elegans  | -----DFAQLQPVVSRSPSNPRHHNVRFPVPSGKPN-----                   |
| 13:6239  | 1119          | NM_001268292   | fln-1 | Caenorhabditis_elegans  | -----DFAQLQPVVSRSPSNPRHHNVRFPVPSGKPN-----                   |
| 13:6239  | 1119          | NM_001268293   | fln-1 | Caenorhabditis_elegans  | -----TPNPNPQACT-----                                        |
| 13:6239  | 1119          | NM_001307431   | fln-1 | Caenorhabditis_elegans  | -----DFAQLQPVVSRSPSNPRHHNVRFPVPSGKPN-----                   |
| 13:6239  | 1119          | NM_001307432   | fln-1 | Caenorhabditis_elegans  | -----DFAQLQPVVSRSPSNPRHHNVRFPVPSGKPN-----                   |
| 13:6239  | 1119          | NM_001307433   | fln-1 | Caenorhabditis_elegans  | -----DFAQLQPVVSRSPSNPRHHNVRFPVPSGKPN-----                   |
| 13:6239  | 1119          | NM_001307434   | fln-1 | Caenorhabditis_elegans  | -----DFAQLQPVVSRSPSNPRHHNVRFPVPSGKPN-----                   |
| 13:6239  | 1119          | NM_001307435   | fln-1 | Caenorhabditis_elegans  | -----DFAQLQPVVSRSPSNPRHHNVRFPVPSGKPN-----                   |
| 13:6239  | 1119          | NM_001307436   | fln-1 | Caenorhabditis_elegans  | -----DFAQLQPVVSRSPSNPRHHNVRFPVPSGKPN-----                   |
| 13:6239  | 1119          | NM_001307437   | fln-1 | Caenorhabditis_elegans  | -----DFAQLQPVVSRSPSNPRHHNVRFPVPSGKPN-----                   |
| 13:6239  | 1119          | NM_001307438   | fln-1 | Caenorhabditis_elegans  | -----DFAQLQPVVSRSPSNPRHHNVRFPVPSGKPN-----                   |
| 13:6239  | 1119          | NM_001307439   | fln-1 | Caenorhabditis_elegans  | -----DFAQLQPVVSRSPSNPRHHNVRFPVPSGKPN-----                   |
| 13:6239  | 1119          | NM_001307440   | fln-1 | Caenorhabditis_elegans  | -----DFAQLQPVVSRSPSNPRHHNVRFPVPSGKPN-----                   |
| 13:6239  | 1119          | NM_001307441   | fln-1 | Caenorhabditis_elegans  | -----DFAQLQPVVSRSPSNPRHHNVRFPVPSGKPN-----                   |
| 13:6239  | 1119          | NM_001307442   | fln-1 | Caenorhabditis_elegans  | -----DFAQLQPVVSRSPSNPRHHNVRFPVPSGKPN-----                   |
| 13:6239  | 1119          | NM_001307443   | fln-1 | Caenorhabditis_elegans  | -----DFAQLQPVVSRSPSNPRHHNVRFPVPSGKPN-----                   |

|          |               |                |       |                         |                                                                    |
|----------|---------------|----------------|-------|-------------------------|--------------------------------------------------------------------|
| 00:1     | Ac-MQHRPPGFSR |                |       |                         |                                                                    |
| 01:9606  | 1119          | 0#NP_001104026 | FLNA  | Homo_sapiens            | VEYTPYEEGLHSVDVITYDGSPVPSSPFQVPVTEGCDPSRVRVHVGPGIQSGTTNKNKFTV      |
| 01:9606  | 1119          | 0#NP_001447    | FLNA  | Homo_sapiens            | VEYTPYEEGLHSVDVITYDGSPVPSSPFQVPVTEGCDPSRVRVHVGPGIQSGTTNKNKFTV      |
| 01:9606  | 1119          | NM_001110556   | FLNA  | Homo_sapiens            | VEYTPYEEGLHSVDVITYDGSPVPSSPFQVPVTEGCDPSRVRVHVGPGIQSGTTNKNKFTV      |
| 01:9606  | 1119          | NM_001456      | FLNA  | Homo_sapiens            | VEYTPYEEGLHSVDVITYDGSPVPSSPFQVPVTEGCDPSRVRVHVGPGIQSGTTNKNKFTV      |
| 04:9913  | 1119          | NM_001206514   | FLNA  | Bos_taurus              | VEYTPYEEGLHSVDVITYDGSPVPSSPFQVPVTEGCDPSRVRVHVGPGIQSGTTNKNKFTV      |
| 06:10116 | 1119          | NM_001134599   | Flna  | Rattus_norvegicus       | VEYTPYEEGLHSVDVITYDGSPVPSSPFQVPVTEGCDPSRVRVHVGPGIQSGTTNKNKFTV      |
| 07:10090 | 1119          | NM_001290421   | Flna  | Mus_musculus            | VEYTPYEEGLHSVDVITYDGSPVPSSPFQVPVTEGCDPSRVRVHVGPGIQSGTTNKNKFTV      |
| 07:10090 | 1119          | NM_010227      | Flna  | Mus_musculus            | VEYTPYEEGLHSVDVITYDGSPVPSSPFQVPVTEGCDPSRVRVHVGPGIQSGTTNKNKFTV      |
| 08:9031  | 1119          | NM_204574      | FLNA  | Gallus_gallus           | VQYTPYEEGVHTVEVSYGGSPLPAGPFRVAVTEGCDPSRVRVHVGPGIAGGTARQPNCFVT      |
| 12:7227  | 1119          | NM_001144595   | cher  | Drosophila_melanogaster | -----                                                              |
| 12:7227  | 1119          | NM_001202309   | cher  | Drosophila_melanogaster | -----IMYTPFEAGRHTIELMYDNIIPVPGSPFFVNVKSGCDPARCKAYGPGLEKGLTNQKNKFTV |
| 12:7227  | 1119          | NM_001275727   | cher  | Drosophila_melanogaster | -----                                                              |
| 12:7227  | 1119          | NM_001275728   | cher  | Drosophila_melanogaster | -----IMYTPFEAGRHTIELMYDNIIPVPGSPFFVNVKSGCDPARCKAYGPGLEKGLTNQKNKFTV |
| 12:7227  | 1119          | NM_001275729   | cher  | Drosophila_melanogaster | -----IMYTPFEAGRHTIELMYDNIIPVPGSPFFVNVKSGCDPARCKAYGPGLEKGLTNQKNKFTV |
| 12:7227  | 1119          | NM_001275730   | cher  | Drosophila_melanogaster | -----IMYTPFEAGRHTIELMYDNIIPVPGSPFFVNVKSGCDPARCKAYGPGLEKGLTNQKNKFTV |
| 12:7227  | 1119          | NM_079659      | cher  | Drosophila_melanogaster | -----                                                              |
| 12:7227  | 1119          | NM_169746      | cher  | Drosophila_melanogaster | -----                                                              |
| 12:7227  | 1119          | NM_169747      | cher  | Drosophila_melanogaster | -----                                                              |
| 12:7227  | 1119          | NM_206502      | cher  | Drosophila_melanogaster | -----IMYTPFEAGRHTIELMYDNIIPVPGSPFFVNVKSGCDPARCKAYGPGLEKGLTNQKNKFTV |
| 13:6239  | 1119          | NM_001028379   | fln-1 | Caenorhabditis_elegans  | -----VSIPIEIIYDGLKIDEXLVK--VLPEVEPQLIKILHDKKKDSLTTTP-----          |
| 13:6239  | 1119          | NM_001028380   | fln-1 | Caenorhabditis_elegans  | -----                                                              |
| 13:6239  | 1119          | NM_001038368   | fln-1 | Caenorhabditis_elegans  | -----                                                              |



[illegible][illegible][illegible]

ASGPGLNTTGVPSASLPVEFTIDAKDAGE-GLLAVQITDPGEKP--KKTHIQDNHDG-TYT  
ASGPGLNTTGVPSASLPVEFTIDAKDAGE-GLLAVQITDPGEKP--KKTHIQDNHDG-TYT  
ASGPGLNTTGVPSASLPVEFTIDAKDAGE-GLLAVQITDPGEKP--KKTHIQDNHDG-TYT  
ASGPGLNTTGVPSASLPVEFTIDAKDAGE-GLLAVQITDPGEKP--KKTHIQDNHDG-TYT  
ASGPGLNTTGVPSASLPVEFTIDAKDAGE-GLLAVQITDPGEKP--KKTHIQDNHDG-TYT  
ASGPGLNTTGVPSASLPVEFTIDAKDAGE-GLLAVQITDPGEKP--KKTHIQDNHDG-TYT  
ASGPGLNTTGVPSASLPVEFTIDAKDAGE-GLLAVQITDPGEKP--KKTHIQDNHDG-TYT  
ASGPGLNTTGVPSASLPVEFTIDAKDAGE-GLLAVQITDPGEKP--KKTHIQDNHDG-TYT  
ASGPGLNTSGVPASLPVEFTIDAKDAGE-GLLAVQITDPGEKP--KKASIRDNHG-DYTT  
---QTA-KENT-----I---RSQS-NDIE-----LINRITQVHSNRSAG  
VKGVNE-KKKTASPLPAEFIDTKAQAG-ADINVAIKNPKGKA--MQPRLEEVSTGT-YV  
---QTA-KENT-----I---RSQS-NDIE-----LINRITQVHSNRSAG  
VKGVNE-KKKTASPLPAEFIDTKAQAG-ADINVAIKNPKGKA--MQPRLEEVSTGT-YV  
VKGVNE-KKKTASPLPAEFIDTKAQAG-ADINVAIKNPKGKA--MQPRLEEVSTGT-YV  
VKGVNE-KKKTASPLPAEFIDTKAQAG-ADINVAIKNPKGKA--MQPRLEEVSTGT-YV  
VKGVNE-KKKTASPLPAEFIDTKAQAG-ADINVAIKNPKGKA--MQPRLEEVSTGT-YV

ASGPGLNTTGVPSASLPVEFTIDAKDAGE--GLLAVQITDPEGKP--KKTHIQDNHDG-TYT  
 ASGPGLNTTGVPSASLPVEFTIDAKDAGE--GLLAVQITDPEGKP--KKTHIQDNHDG-TYT  
 ASGPGLNTTGVPSASLPVEFTIDAKDAGE--GLLAVQITDPEGKP--KKTHIQDNHDG-TYT  
 ASGPGLNTTGVPSASLPVEFTIDAKDAGE--GLLAVQITDPEGKP--KKTHIQDNHDG-TYT  
 ASGPGLNTTGVPSASLPVEFTIDAKDAGE--GLLAVQITDPEGKP--KKTHIQDNHDG-TYT  
 ASGPGLNTTGVPSASLPVEFTIDAKDAGE--GLLAVQITDPEGKP--KKTHIQDNHDG-TYT  
 ASGPGLNTTGVPSASLPVEFTIDAKDAGE--GLLAVQITDPEGKP--KKTHIQDNHDG-TYT  
 ASGPGLNTTGVPSASLPVEFTIDAKDAGE--GLLAVQITDPEGKP--KKTHIQDNHDG-TYT  
 ASGPGLNTSGVPASLPVEFTIDAKDAGE--GLLAVQITDPEGKP--KKASIRDNGDG-TYT  
 ---QTA-KENT-----I---RSQS-NDIE-----LINRITQVHSNRSAG  
 VKGVNE--KKKTPASLPAEF EIDTKQAGQ-ADINVAIKNPKGKA--MQPRLEEVSTGT-YV  
 ---QTA-KENT-----I---RSQS-NDIE-----LINRITQVHSNRSAG  
 VKGVNE--KKKTPASLPAEF EIDTKQAGQ-ADINVAIKNPKGKA--MQPRLEEVSTGT-YV  
 VKGVNE--KKKTPASLPAEF EIDTKQAGQ-ADINVAIKNPKGKA--MQPRLEEVSTGT-YV  
 VKGVNE--KKKTPASLPAEF EIDTKQAGQ-ADINVAIKNPKGKA--MQPRLEEVSTGT-YV  
 VKGVNE--KKKTPASLPAEF EIDTKQAGQ-ADINVAIKNPKGKA--MQPRLEEVSTGT-YV  
 -----  
 -----  
 VKGVNE--KKKTPASLPAEF EIDTKQAGQ-ADINVAIKNPKGKA--MQPRLEEVSTGT-YV  
 IVFHPEIAEHSPTVLTYNHPIDAKKKKAHPAIQVLAAPDAVRLEHIQELVDNGHRVADR  
 -----  
 -----  
 -----  
 IVFHPEIAEHSPTVLTYNHPIDAKKKKAHPAIQVLAAPDAVRLEHIQELVDNGHRVADR  
 IVFHPEIAEHSPTVLTYNHPIDAKKKKAHPAIQVLAAPDAVRLEHIQELVDNGHRVADR







[illegible]

```

RMSHLKVGVS--AADIPINISETDLSSLTATVPPSPSGREEPCLLKRLRNHGVGISFVPKET
RMSHLKVGVS--AADIPINISETDLSSLTATVPPSPSGREEPCLLKRLRNHGVGISFVPKET
RMSHLKVGVS--AADIPINISETDLSSLTATVPPSPSGREEPCLLKRLRNHGVGISFVPKET
RMSHLKVGVS--AADIPINISETDLSSLTATVPPSPSGREEPCLLKRLRNHGVGISFVPKET
RMSHLKVGVS--AADIPINISETDLSSLTATVPPSPSGREEPCLLKRLRNHGVGISFVPKET
RMSHLKVGVS--AADIPINISETDLSSLTATVPPSPSGREEPCLLKRLRNHGVGISFVPKET
RMSHLKVGVS--AADIPINISETDLSSLTATVPPSPSGREEPCLLKRLRNHGVGISFVPKET
RMSHLKVGVS--AADIPINISETDLSSLTATVPPSPSGREEPCLLKRLRNHGVGISFVPKET
RQSHLKVGA--SADIPDLIAESDLSQLAASVTAPSGRKEPCQLKRLRDGHVGISFVPQEV
RN-QISVGSCSEVTMPGDIITDDLRLNALNASIAPSGLEEEPCFLKRMPGTGNIGISFTPREI
RN-QISVGSCSEVTMPGDIITDDLRLNALNASIAPSGLEEEPCFLKRMPGTGNIGISFTPREI
RN-QISVGSCSEVTMPGDIITDDLRLNALNASIAPSGLEEEPCFLKRMPGTGNIGISFTPREI
RN-QISVGSCSEVTMPGDIITDDLRLNALNASIAPSGLEEEPCFLKRMPGTGNIGISFTPREI
RN-QISVGSCSEVTMPGDIITDDLRLNALNASIAPSGLEEEPCFLKRMPGTGNIGISFTPREI
RN-QISVGSCSEVTMPGDIITDDLRLNALNASIAPSGLEEEPCFLKRMPGTGNIGISFTPREI
RN-QISVGSCSEVTMPGDIITDDLRLNALNASIAPSGLEEEPCFLKRMPGTGNIGISFTPREI
RN-QISVGSCSEVTMPGDIITDDLRLNALNASIAPSGLEEEPCFLKRMPGTGNIGISFTPREI
RN-QISVGSCSEVTMPGDIITDDLRLNALNASIAPSGLEEEPCFLKRMPGTGNIGISFTPREI
RS-HLSVGSTSEVALP--ITQQLKGISASIKSPGIEEPCFVRLLDGGRLGVSTPREI

```

[illegible][illegible][illegible]







[illegible][illegible]



***TNS1***

Ac-AAPCVPPSNHELVPITTENAPKNVVDKGEGASR

CLUSTAL O(1.2.1) multiple sequence alignment

|                                                    |                                                               |
|----------------------------------------------------|---------------------------------------------------------------|
| 00:1 Ac-AAPCVPPSNHELVPITTENAPKNVVDKGEASR           | -----                                                         |
| 01:9606 11219 0#NP_001294951 TNS1 Homo_sapiens     | -----                                                         |
| 01:9606 11219 0#NP_001294952 TNS1 Homo_sapiens     | -----                                                         |
| 01:9606 11219 0#NP_072174 TNS1 Homo_sapiens        | -----                                                         |
| 01:9606 11219 NM_001308022 TNS1 Homo_sapiens       | -----                                                         |
| 01:9606 11219 NM_001308023 TNS1 Homo_sapiens       | -----                                                         |
| 01:9606 11219 NM_022648 TNS1 Homo_sapiens          | -----                                                         |
| 04:9913 11219 NM_174766 TNS1 Bos_taurus            | -----                                                         |
| 06:10116 11219 NM_001191810 Tns1 Rattus_norvegicus | MGCTVSLVCCEALEPLPSCGPQPPGTPPGPARPERSEPGGAASIQRRRLLLQPEDLEAPK  |
| 07:10090 11219 NM_001289895 Tns1 Mus_musculus      | MGCTVSLVCCEALEPLPSCGPQPPGTPPGPARPERCEPGGAAPDPRRRLLLQPEDLEAPK  |
| 07:10090 11219 NM_027884 Tns1 Mus_musculus         | MGCTVSLVCCEALEPLPSCGPQPPGTPPGPARPERCEPGGAAPDPRRRLLLQPEDLEAPK  |
| 07:10090 11219 NM_177169 Tns1 Mus_musculus         | -----                                                         |
| 08:9031 11219 NM_205455 TNS1 Gallus_gallus         | -----                                                         |
| 00:1 Ac-AAPCVPPSNHELVPITTENAPKNVVDKGEASR           | -----AAPCVPPSNHELVPIT                                         |
| 01:9606 11219 0#NP_001294951 TNS1 Homo_sapiens     | -----                                                         |
| 01:9606 11219 0#NP_001294952 TNS1 Homo_sapiens     | -----                                                         |
| 01:9606 11219 0#NP_072174 TNS1 Homo_sapiens        | -----                                                         |
| 01:9606 11219 NM_001308022 TNS1 Homo_sapiens       | -----VAAPCVPPSNHELVPIT                                        |
| 01:9606 11219 NM_001308023 TNS1 Homo_sapiens       | -----VAAPCVPPSNHELVPIT                                        |
| 01:9606 11219 NM_022648 TNS1 Homo_sapiens          | -----LSGSSAGKVAAPCVPPSNHELVPIT                                |
| 04:9913 11219 NM_174766 TNS1 Bos_taurus            | -----AQTPIPPSDSSTGKVAAPCIPPSHELVPVN                           |
| 06:10116 11219 NM_001191810 Tns1 Rattus_norvegicus | THHFVKVAFKKVKPCGVCQRQAITREGCICKVCSFSCHRKCQAKVAAPCVPPSNHELVPIT |
| 07:10090 11219 NM_001289895 Tns1 Mus_musculus      | THHFVKVAFKKVKPCGICRQAITREGCVCKVCSFSCHRKCQAKVAAPCVPPSNHELVPIT  |
| 07:10090 11219 NM_027884 Tns1 Mus_musculus         | THHFVKVAFKKVKPCGICRQAITREGCVCKVCSFSCHRKCQAKVAAPCVPPSNHELVPIT  |
| 07:10090 11219 NM_177169 Tns1 Mus_musculus         | -----                                                         |
| 08:9031 11219 NM_205455 TNS1 Gallus_gallus         | -----GSAAGPFGCRHERPRM-DFGSVMNQATPCSPAVNYELPSPG                |
| 00:1 Ac-AAPCVPPSNHELVPITTENAPKNVVDKGEASR           | TENAPKNVVDKGEASR-----                                         |
| 01:9606 11219 0#NP_001294951 TNS1 Homo_sapiens     | -----                                                         |
| 01:9606 11219 0#NP_001294952 TNS1 Homo_sapiens     | -----                                                         |
| 01:9606 11219 0#NP_072174 TNS1 Homo_sapiens        | -----                                                         |
| 01:9606 11219 NM_001308022 TNS1 Homo_sapiens       | TENAPKNVVDKGEASRGGNTRKSLEDNGST--RVTPSVQ----PH---LQPI-----     |
| 01:9606 11219 NM_001308023 TNS1 Homo_sapiens       | TENAPKNVVDKGEASRGGNTRKSLEDNGST--RVTPSVQ----PH---LQPI-----     |
| 01:9606 11219 NM_022648 TNS1 Homo_sapiens          | TENAPKNVVDKGEASRGGNTRKSLEDNGST--RVTPSVQ----PH---LQPI-----     |
| 04:9913 11219 NM_174766 TNS1 Bos_taurus            | TETAPKNVVDTEGAASRGGNTRKSLEEDSST--RVTPSVQ----PH---PQPI-----    |
| 06:10116 11219 NM_001191810 Tns1 Rattus_norvegicus | TESVPKNVVDVGECDRGGSTPKNLEEAGSM--RVSPSIQ----PQ---PQPQPISLS     |
| 07:10090 11219 NM_001289895 Tns1 Mus_musculus      | TETVPKNVVDVGECDRVGSSPKNLEEAGSM--RVSPSIQ----PQ---PQS--QPTSL    |
| 07:10090 11219 NM_027884 Tns1 Mus_musculus         | TETVPKNVVDVGECDRVGSSPKNLEEAGSM--RVSPSIQ----PQ---PQS--QPTSL    |
| 07:10090 11219 NM_177169 Tns1 Mus_musculus         | -----VHGGGQGSAPGSLGSAIFPHQDPLRNFCLPDWALEMGPDPWILTWAHPLL       |
| 08:9031 11219 NM_205455 TNS1 Gallus_gallus         | -QSITKQ-----VDTP-----DAT----RS-----PRGGQAHCKAS                |
| 00:1 Ac-AAPCVPPSNHELVPITTENAPKNVVDKGEASR           | -----                                                         |
| 01:9606 11219 0#NP_001294951 TNS1 Homo_sapiens     | --MSVSRTMEDSCELDLVYVTERIIAVSFPSTANE-ENFRSNLREVAQMLKSKHGGNYLL  |
| 01:9606 11219 0#NP_001294952 TNS1 Homo_sapiens     | --MSVSRTMEDSCELDLVYVTERIIAVSFPSTANE-ENFRSNLREVAQMLKSKHGGNYLL  |
| 01:9606 11219 0#NP_072174 TNS1 Homo_sapiens        | --MSVSRTMEDSCELDLVYVTERIIAVSFPSTANE-ENFRSNLREVAQMLKSKHGGNYLL  |
| 01:9606 11219 NM_001308022 TNS1 Homo_sapiens       | RNMSVSRTMEDSCELDLVYVTERIIAVSFPSTANE-ENFRSNLREVAQMLKSKHGGNYLL  |
| 01:9606 11219 NM_001308023 TNS1 Homo_sapiens       | RNMSVSRTMEDSCELDLVYVTERIIAVSFPSTANE-ENFRSNLREVAQMLKSKHGGNYLL  |
| 01:9606 11219 NM_022648 TNS1 Homo_sapiens          | RNMSVSRTMEDSCELDLVYVTERIIAVSFPSTANE-ENFRSNLREVAQMLKSKHGGNYLL  |
| 04:9913 11219 NM_174766 TNS1 Bos_taurus            | RNMSTSRTEDESCELDLVYVTERIIAVSFPSTANE-ENFRSNLREVAQMLKSKHGGNYLL  |
| 06:10116 11219 NM_001191810 Tns1 Rattus_norvegicus | RNLVSVRAMEDSCELDLVYITERIIAVSFPSTANE-ENFRSNLREVAQMLKSKHGGNYLL  |
| 07:10090 11219 NM_001289895 Tns1 Mus_musculus      | RNTSVSRAMEDSCELDLVYVTERIIAVSFPSTANE-ENFRSNLREVAQMLKSKHGGNYLL  |
| 07:10090 11219 NM_027884 Tns1 Mus_musculus         | RNTSVSRAMEDSCELDLVYVTERIIAVSFPSTANE-ENFRSNLREVAQMLKSKHGGNYLL  |
| 07:10090 11219 NM_177169 Tns1 Mus_musculus         | RNTSVSRAMEDSCELDLVYVTERIIAVSFPSTANE-ENFRSNLREVAQMLKSKHGGNYLV  |
| 08:9031 11219 NM_205455 TNS1 Gallus_gallus         | RSMSVTAAMESSCELDLVYITERIIAVSYPSTAEPRSFNRSNLREVAHMLKSKHGDNYVL  |
| 00:1 Ac-AAPCVPPSNHELVPITTENAPKNVVDKGEASR           | -----                                                         |
| 01:9606 11219 0#NP_001294951 TNS1 Homo_sapiens     | FNLSEQR-----PDITKLHAKVLEFGWP-----DLH-----TPALEKICSICKAMDT     |
| 01:9606 11219 0#NP_001294952 TNS1 Homo_sapiens     | FNLSEQR-----PDITKLHAKVLEFGWP-----DLH-----TPALEKICSICKAMDT     |
| 01:9606 11219 0#NP_072174 TNS1 Homo_sapiens        | FNLSEQR-----PDITKLHAKVLEFGWP-----DLH-----TPALEKICSICKAMDT     |
| 01:9606 11219 NM_001308022 TNS1 Homo_sapiens       | FNLSEQR-----PDITKLHAKVLEFGWP-----DLH-----TPALEKICSICKAMDT     |
| 01:9606 11219 NM_001308023 TNS1 Homo_sapiens       | FNLSEQR-----PDITKLHAKVLEFGWP-----DLH-----TPALEKICSICKAMDT     |
| 01:9606 11219 NM_022648 TNS1 Homo_sapiens          | FNLSEQR-----PDITKLHAKVLEFGWP-----DLH-----TPALEKICSICKAMDT     |
| 04:9913 11219 NM_174766 TNS1 Bos_taurus            | FNLSEQR-----PDITKLHAKVLEFGWP-----DLH-----TPALEKICSICKAMDT     |
| 06:10116 11219 NM_001191810 Tns1 Rattus_norvegicus | FNLSEQR-----PDITKLHAKVLEFGWP-----DLH-----TPALEKICSICKAMDT     |
| 07:10090 11219 NM_001289895 Tns1 Mus_musculus      | FNLSEQR-----PDITKLHAKVLEFGWP-----DLH-----TPALEKICSICKAMDT     |
| 07:10090 11219 NM_027884 Tns1 Mus_musculus         | FNLSEQR-----PDITKLHAKVLEFGWP-----DLH-----TPALEKICSICKAMDT     |
| 07:10090 11219 NM_177169 Tns1 Mus_musculus         | GGPHPPSSCSLPVHREFLTPTPHASTLPFSTLGILQGPFGHVSLERADSRRESVCS----- |
| 08:9031 11219 NM_205455 TNS1 Gallus_gallus         | FNLSEQR-----HDISKLHPKVLDGFWP-----DLH-----TPALEKICSICKAMDT     |
| 00:1 Ac-AAPCVPPSNHELVPITTENAPKNVVDKGEASR           | -----                                                         |
| 01:9606 11219 0#NP_001294951 TNS1 Homo_sapiens     | WLNADPHNVVVLHKNRGRIGVVIYAAYMHYSNISASADQALDRFAMKRFYEDKIVPIGQ   |
| 01:9606 11219 0#NP_001294952 TNS1 Homo_sapiens     | WLNADPHNVVVLHKNRGRIGVVIYAAYMHYSNISASADQALDRFAMKRFYEDKIVPIGQ   |
| 01:9606 11219 0#NP_072174 TNS1 Homo_sapiens        | WLNADPHNVVVLHKNRGRIGVVIYAAYMHYSNISASADQALDRFAMKRFYEDKIVPIGQ   |
| 01:9606 11219 NM_001308022 TNS1 Homo_sapiens       | WLNADPHNVVVLHKNRGRIGVVIYAAYMHYSNISASADQALDRFAMKRFYEDKIVPIGQ   |
| 01:9606 11219 NM_001308023 TNS1 Homo_sapiens       | WLNADPHNVVVLHKNRGRIGVVIYAAYMHYSNISASADQALDRFAMKRFYEDKIVPIGQ   |
| 01:9606 11219 NM_022648 TNS1 Homo_sapiens          | WLNADPHNVVVLHKNRGRIGVVIYAAYMHYSNISASADQALDRFAMKRFYEDKIVPIGQ   |
| 04:9913 11219 NM_174766 TNS1 Bos_taurus            | WLNADPHNVVVLHKNRGRIGVVIYAAYMHYSNISASADHALDRFAMKRFYEDKIVPIGQ   |

WLNADPHNVVVLHNKGNRGRIGVVIAAYMHYSNISASADQALDRFAMKRFYEDKIVPIGQ  
WLNADPHNVVVLHNKGNRGRIGVVIAAYLHYSNISASADQALDRFAMKRFYEDKIVPIGQ  
WLNADPHNVVVLHNKGNRGRIGVVIAAYLHYSNISASADQALDRFAMKRFYEDKIVPIGQ  
-----  
WLNAAAHNVVVLHNKGNRGLGVVVAAYMHYSNISASADQALDRFAMKRFYEDKVPVPGQ

PSQRRYVHYFSGLLSGSIKMNNKPLFLHHVIMHGIPNFESKGCCRPFRLRIYQAMQPVYTS  
PSQRYIHYFSGLLSGSIKMNNKPLFLHHVIMHGIPNFESKGCCRPFRLKIYQAMQPVYTS

[illegible][illegible]

```

-----MEEVVGHTQGP LDGSLYAKVKKKDSLHGSTGAVNAT
DNFSGHRDDG-----MEEVVGHTQGP LDGSLYAKVKKKDSLHGSTGAVNAT
DNFSGHRDDG-----MEEVVGHTQGP LDGSLYAKVKKKDSLHGSTGAVNAT
DNFSGHRDDG-----MEEVVGHTQGP LDGSLYAKVKKKDSLHGSTGAVNAT
DNFSGHRDDG-----MEEVVGHTQGP LDGSLYAKVKKKDSLHGSTGAVNAT
DNFSGHRDDG-----MEEVVGHTQGP LDGSLYAKVKKKDSLHGSTGAVNAT
DNFNGHRDDG-----MEEVVGHTPGT LDGSLYAKVKKKDSLHGSGNAVNAT
DNFNGHREDG-----MEEVVGHTQGP LDGSLYAKVKKKDSLNGSSGPITTA
DNFSGHREDG-----MEEVVGHTQGP LDGSLYAKVKKKDSLNGSSGPVTTA
DNFSGHREDG-----MEEVVGHTQGP LDGSLYAKVKKKDSLNGSSGPVTTA
-----
ENFNIQREDSAEGTWAEALP GKHLEKEVGHGTQGP LDGSLYAKVKKKDSLHSGIGAVNTA

```

RPTLSATPNHVEHTLSVSSDSGNSTASTKTDKTDEPV-PGASSATAALSPQEKRELDRL  
RPTLSATPNHVEHTLSVSSDSGNSTASTKTDKTDEPV-PGASSATAALSPQEKRELDRL  
RPTLSATPNHVEHTLSVSSDSGNSTASTKTDKTDEPV-PGASSATAALSPQEKRELDRL  
RPTLSATPNHVEHTLSVSSDSGNSTASTKTDKTDEPV-PGASSATAALSPQEKRELDRL  
RPTLSATPNHVEHTLSVSSDSGNSTASTKTDKTDEPV-PGASSATAALSPQEKRELDRL  
RPTLSATPNHVEHTLSVSSDSGNSTASTKTDKTDEPV-PGASSATAALSPQEKRELDRL  
RPVLSATPNHVEHTLSVSSDSGNSTASTKTDKTDEPA-PGPASAPALSPQEKRELDRL  
RPALSATPNHVEHTLSVSSDSGNSTASTKTDKTDEPV-SGAIAAPALSPQEKRELDRL  
RPALSATPNHVEHTLSVSSDSGNSTASTKTDKTDEPV-SGATTAPALSPQEKRELDRL  
RPALSATPNHVEHTLSVSSDSGNSTASTKTDKTDEPV-SGATTAPALSPQEKRELDRL  
RLPLSAAPNHVEHTLSVSSDSGNSTASTKTDRTDEPGAPAGTGHAVLSPQEKRDVRL

-----  
 SGFGLEREKQGAMYHTQHLRSRPAGGSAPVSSGRHVVPQVHVNGG--ALASERETDILD  
 SGFGLEREKQGAMYHTQHLRSRPAGGSAPVSSGRHVVPQVHVNGG--ALASERETDILD  
 SGFGLEREKQGAMYHTQHLRSRPAGGSAPVSSGRHVVPQVHVNGG--ALASERETDILD  
 -----

SGFGLEREKQGAMYH<sup>1</sup>QHLRSRPAGGS<sup>2</sup>AVPSSGRHV<sup>3</sup>VPQVHVNGG--ALASERETDILD  
SGFGLEREKQGAMYHT<sup>1</sup>QHLRSRPAGGS<sup>2</sup>AVPSSGRHV<sup>3</sup>VPQVHVNGG--ALASERETDILD  
SGFGLEREKQGAMYHT<sup>1</sup>QHLRSRPAGGS<sup>2</sup>AVPSSGRHV<sup>3</sup>VPQVHVNGG--ALASERETDILD  
SGFGLEREKQGAMYHP<sup>1</sup>QHLRSRPVGGP<sup>2</sup>AAPSSGRHIV<sup>3</sup>PAQVHVRGG--VLSVERETDILD  
SGFGVDREKQGAMYRAQ<sup>1</sup>QLRSHPGGGT<sup>2</sup>VPS<sup>3</sup>SPGRHIV<sup>4</sup>PAQVHVNGG--ALASERETDILD  
SGFGVDREKQGAMYRAQ<sup>1</sup>QLRSHPGGGT<sup>2</sup>VPS<sup>3</sup>SPGRHIV<sup>4</sup>PAQVHVNGG--ALASERETDILD  
SGFGVDREKQGAMYRAQ<sup>1</sup>QLRSHPGGGT<sup>2</sup>VPS<sup>3</sup>SPGRHIV<sup>4</sup>PAQVHVNGG--ALASERETDILD  
VGFGLESAAPMHN-----HAPGPAPARLPAGPGRHV<sup>3</sup>VPQVHVNGAGT<sup>4</sup>PLLAERETDILD

DELPNQDGHSGAGSMGTLSSLDGVTNTSEGGYPEAL---SPLTNGLDK  
DELPNQDGHSGAGSMGTLSSLDGVTNTSEGGYPEAL---SPLTNGLDK  
DELPNQDGHSGAGSMGTLSSLDGVTNTSEGGYPEAL---SPLTNGLDK  
DELPNQDGHSGAGSMGTLSSLDGVTNTSEGGYPEAL---SPLTNGLDK  
DELPNQDGHSGAGSMGTLSSLDGVTNTSEGGYPEAL---SPLTNGLDK  
DELPNQDGHSGAGSMGTLSSLDGVTNTSEGGYPEAL---SPLTNGLDK  
DELPNQDGHSGAGSMGTLSSLDGVTNTSEGGYPEAL---SPLTNGLDK  
DELPIQDQGSGGSMGTLSSLDGVTNTSEGGYPETL---SPLTNGLDK  
DELPIQDQGSGGSMGTLSSLDGVTNTSEGGYPETL---SPLTNGLDK  
DELPIQDQGSGGSMGTLSSLDGVTNTSEGGYPETL---SPLTNGLDK  
  
DELPNQDGHSGVSLGTLSSLDGTTTASEAGFHEAPRVGSLSSLPNGPASYNAGAEKMLKEG

SYPMPEMVGNGGYPYESASRAGPAH-AGHTAPMRPSYSAQEGLAGYQREGP--HPAWQP  
SYPMPEMVGNGGYPYESASRAGPAH-AGHTAPMRPSYSAQEGLAGYQREGP--HPAWQP  
SYPMPEMVGNGGYPYESASRAGPAH-AGHTAPMRPSYSAQEGLAGYQREGP--HPAWQP  
SYPMPEMVGNGGYPYESASRAGPAH-AGHTAPMRPSYSAQEGLAGYQREGP--HPAWQP  
SYPMPEMVGNGGYPYESASRAGPAH-AGHTAPMRPSYSAQEGLAGYQREGP--HPAWQP  
SYPMPEMVGNGGYPYESASRAGPAH-AGHTAPMRPSYSAQEGLAGYQREGP--HPAWQP  
PYPMPEMVGNGGYPYESASRAVSQA-AGHTAPMRPSYSTQEGLAGYQREGP--HPAWQP  
PYPTPEILNGGGYPYESANRVVPVH-SSHSAPIRPSYSAQEGLAGGYQREGP--HPAWSK  
PYSTPEVLNGGGYPYEAANRVIPVH-SSHSAPIRPSYSAQEGLAGYQREGP--HPAWSQ  
PYSTPEVLNGGGYPYEAANRVIPVH-SSHSAPIRPSYSAQEGLAGYQREGP--HPAWSQ  
LYEAEPLSGAYPYSNONTLMGHHLRDPLAHLRPSRSAQEHLAGYQROPASASPAWLQ

PVTT--SHYAHDPSGMFRSQSFSEA-----EPQLPPAPVRGSSREAVQRLNSWQQQ  
 PVTT--SHYAHDPSGMFRSQSFSEA-----EPQLPPAPVRGSSREAVQRLNSWQQQ  
 PVTT--SHYAHDPSGMFRSQSFSEA-----EPQLPPAPVRGSSREAVQRLNSWQQQ  
 PVTT--SHYAHDPSGMFRSQSFSEA-----EPQLPPAPVRGSSREAVQRLNSWQQQ  
 PVTT--SHYAHDPSGMFRSQSFSEA-----EPQLPPAPVRGSSREAVQRLNSWQQQ  
 PVTT--SHYAHDPSGMFRSQSFSEA-----EPQLPPAPVRGSSREAVQRLNSWQQQ  
 SATT--SHYGHDPNGMFRSQSFPET-----EPQLPPAPARGSSREAVQRLNSWQQQ  
 QVTS--AHRGYDPSGLFRSQSFPDV-----EPQLPQAPARGSSREAVQRLNSWQQQ  
 QVTS--AHCGCDPGLFRSQSFPDV-----EPQLPQAPTRGSSREAVQRLNSWQQQ  
 QVTS--AHCGCDPGLFRSQSFPDV-----EPQLPQAPTRGSSREAVQRLNSWQQQ  
 PPVPQPYLYGYDLPASHRSQSPVAVGTAKYEANLALPOAPARSTSSREAVQRLNSWQQQ

```

QQ-----QQQPRPPPRQQERAHLESLVASRP--SPQPLAETPIPSLPEFPFRA
QQ-----QQQPRPPPRQQERAHLESLVASRP--SPQPLAETPIPSLPEFPFRA
QQ-----QQQPRPPPRQQERAHLESLVASRP--SPQPLAETPIPSLPEFPFRA
QQ-----QQQPRPPPRQQERAHLESLVASRP--SPQPLAETPIPSLPEFPFRA
QQ-----QQQPRPPPRQQERAHLESLVASRP--SPQPLAETPIPSLPEFPFRA
QQ-----QQQPRPPPRQQERAHLESLVASRP--SPQPLAETPIPSLPEFPFRA
QQQ-----QQQPRPPPRQQERVHLESLGLSRP--SPQPLAETPPMGLPEFPFRA
QQQQQQQQQQQQQQQQQQPPHPPPRQERSPLQSLACSKP--SPHLSAETPIPALPEFPFRA
-----QQPHPPPRQERSPLQSLARSKP--SPQSAETPVAALPEFPFRA
-----QQPHPPPRQERSPLQSLARSKP--SPQSAETPVAALPEFPFRA

GGRSPPSOLHDGGLE-----SHSPSLSCSPSPSPLOPMPPHSHSMPEFPFRA

```

-----  
ASQQEIEQSIETLNMLMLDLEPASAAPLHKSQSVPGAWPGA-----SPLSSQPLSGS  
ASQQEIEQSIETLNMLMLDLEPASAAPLHKSQSVPGAWPGA-----SPLSSQPLSGS  
ASQQEIEQSIETLNMLMLDLEPASAAPLHKSQSVPGAWPGA-----SPLSSQPLSGS  
ASQQEIEQSIETLNMLMLDLEPASAAPLHKSQSVPGAWPGA-----SPLSSQPLSGS  
ASQQEIEQSIETLNMLMLDLEPASAAPLHKSQSVPGAWPGA-----SPLSSQPLSGS  
ASQQEIEQSIETLNMLMLDLEPASAAPLHKSQSVPGAWPGA-----SPLSSQPLSGS  
ASQQEIEQSIETLNMLMLDLEPATAGAPLHKSQSVPGAWPGA-----SPLSSQPFGSGS  
ASQQEIEQSIETLNMLMLDLEPASAAPLHKSQSVPGAWPGA-----SPLSSQPLLGS  
ASQQEIEQSIETLNMLMLDLEPASAAPLHKSQSVPGAWPGA-----SPLSSQPLLGS  
ASQQEIEQSIETLNMLMLDLEPASAAPLHKSQSVPGAWPGA-----SPLSSQPLLGS  
-----PSRREIEQSIEALDVLMLDLAPSIV----HKSQSVPSAATRODKPAAMLSSLSAORLSGH

```
001|Ac-AAPCVPPSNHELVPITTENAPKNVVDKGEASR
01:9606|11219|0#NP_001294951|TNS1|Homo_sapiens
01:9606|11219|0#NP_001294952|TNS1|Homo_sapiens
01:9606|11219|0#NP_072174|TNS1|Homo_sapiens
01:9606|11219|NM_001308022|TNS1|Homo_sapiens
01:9606|11219|NM_001308023|TNS1|Homo_sapiens
01:9606|11219|NM_022648|TNS1|Homo_sapiens
04:9913|11219|NM_174766|TNS1|Bos_taurus
06:10116|11219|NM_001191810|Tns1|Rattus_norvegicus
07:10090|11219|NM_001289895|Tns1|Mus_musculus
07:10090|11219|NM_027884|Tns1|Mus_musculus
```

-----  
VAGPRAQDSEPKSF SAPATQAYGHEIPLRNGTLGGSFVSPSP LSTSSPILSADSTSVGSF  
VAGPRTQEPEPKSF SAPAAQAYGHETPLRIGTLGGSFVSPSP LSTSSPILSADSTSVGSF  
VAGPRAQDVEPKSF SAPATHAYGHETPLRNGTPGGSFVSPSP LSTSSPILSADSTSVGSF  
VAGPRAQDVEPKSF SAPAAHAYGHETPLRNGTPGGSFVSPSP LSTSSPILSADSTSVGSF  
VAGPRAQDVEPKSF SAPAAHAYGHETPLRNGTPGGSFVSPSP LSTSSPILSADSTSVGSF  
-----

-----  
TTGRAG-----NLPAAPVGLVPARNGAFGNSFTVPSPVSTSSPIHSVDGASLRSY

[illegible]

SLQ--HFSSSPESQARAQFSVAGVHTVPGSPQARHRTVGNTNTPPSPGFGWRAINPSMAAP  
SLQ--HFSSSPESQARAQFSVAGVHTVPGSPQARHRTVGNTNTPPSPGFGWRAINPSMAAP  
SLQ--HFSSSPESQARAQFSVAGVHTVPGSPQARHRTVGNTNTPPSPGFGWRAINPSMAAP  
SLQ--HFSSSPESQARAQFSVAGVHTVPGSPQARHRTVGNTNTPPSPGFGWRAINPSMAAP  
SLQ--HFSSSPESQARAQFSVAGVHTVPGSPQARHRTVGNTNTPPSPGFGWRAINPSMAAP  
SLQ--HFSSSPESQARAQFSVAGVHTVPGSPQARHRTVGNTNTPPSPGFGWRAINPSMAAP  
SLQ--QFS-SPGEGQARSQFSVAGVHTVPGSPQARHRTVGNTNTPPSPGFGRRAVNPSLAAP  
SLQ--PFSSSPESQGPQHFSAASVHVMVPGSPQARHRTVGNTNTPPSPGFGRRAINPTMAAP  
SLQ--PFSSSPESQGPQYSAASVHVMVPGSPQARHRTVGNTNTPPSPGFGRRAVNPTMAAP  
SLQ--PFSSSPESQGPQYSAASVHVMVPGSPQARHRTVGNTNTPPSPGFGRRAVNPTMAAP  
PDGRGGFPDPDPARQPPQVSVVGVHALPGSPRTLHRTVATNTNTPPSPGFGRRANPAVAS

SSPSLSHHQMMGPPGTGFHGSTVSSPQSSAATTPGSPSLCRHPAGVYQVSGLHNKVATTP  
SSPSLSHHQMMGPPGTGFHGSTVSSPQSSAATTPGSPSLCRHPAGVYQVSGLHNKVATTP  
SSPSLSHHQMMGPPGTGFHGSTVSSPQSSAATTPGSPSLCRHPAGVYQVSGLHNKVATTP  
SSPSLSHHQMMGPPGTGFHGSTVSSPQSSAATTPGSPSLCRHPAGVYQVSGLHNKVATTP  
SSPSLSHHQMMGPPGTGFHGSTVSSPQSSAATTPGSPSLCRHPAGVYQVSGLHNKVATTP  
SSPSLSHHQMMGPPGTGFHGSTVSSPQSSAATTPGSPSLCRHPAGVYQVSGLHNKVATTP  
SSPSLSHHQMMGPPGTGFHGSTVSSPQSSAATTPGSPSLCRHPAGVYQVSGLHNKVATTP  
SSPSLSHRQVMGPLGTGFHGNTGSSPQSSAATTPGSPSLGRHPGA--QVSNLHGNVVTRP  
GSPSLSRQVMGSPGFGFHGNVVSGHPTATVPAGSPSLGRHPVGSQHVPGLHSSGVVTTT  
GSPSLSRQVMGSPGFGFHGNVVSGHPPASAATTPGSPSLGRHPVGSQHVPGLHSSVVTTT  
GSPSLSRQVMGSPGFGFHGNVVSGHPPASAATTPGSPSLGRHPVGSQHVPGLHSSVVTTT  
--VPGSPGLGRHTVSPHA--

[illegible]

```
-----  
TPEDRRPTLSRQSSASGYQAPSTPSFPVSPAYYPGLSSPATSPSPD$AAFRQGSPT--PA  
TPEDRRPTLSRQSSASGYQAPSTPSFPVSPAYYPGLSSPATSPSPD$AAFRQGSPT--PA  
TPEDRRPTLSRQSSASGYQAPSTPSFPVSPAYYPGLSSPATSPSPD$AAFRQGSPT--PA  
TPEDRRPTLSRQSSASGYQAPSTPSFPVSPAYYPGLSSPATSPSPD$AAFRQGSPT--PA  
TPEDRRPTLSRQSSASGYQAPSTPSFPVSPAYYPGLSSPATSPSPD$AAFRQGSPT--PA  
TPEDRRPTLSRQSSASGYQAPSTPSFPVSPAYYPGLSSPATSPSPD$AAFRQGSPT--PA  
TPEDRRPTLSRQSSASGYQAPSTPSFPVSPAYYPGLSSPATSPSPD$AAFRQGSPT--PA  
TPEDRRPTLSRQSSASGYQAPSTPSFPVSPAYYPGLSSPATSPSPD$AAFRQGSPT--PA  
TPEDRRPTLSRQSSASGYQAPSTPSFPVSPAYYPGLSSPATSPSPD$AAFRQGSPT--PA  
SPEERRPTLSRQSSASGYQPSTPSFPVSPAYYPGTSTPH-SSSDP$AAFRQGSPTPQPA
```

[illegible]

|          |  |       |  |              |  |      |  |                   |                                                               |
|----------|--|-------|--|--------------|--|------|--|-------------------|---------------------------------------------------------------|
| 04:9913  |  | 11219 |  | NM_174766    |  | TNS1 |  | Bos_taurus        | LPEKRRMSMGDRAGSLPNYATVNGKVSSSPVASGMSSPSGGSTVSFSHTLPDFSKYSMPD  |
| 06:10116 |  | 11219 |  | NM_001191810 |  | Tns1 |  | Rattus_norvegicus | LPEKRRMSVGDRAAGSLPNYATINGKVSSSPVANGMASPSGSSTVSFSHTLPDFSKYSMPD |
| 07:10090 |  | 11219 |  | NM_001289895 |  | Tns1 |  | Mus_musculus      | LPEKRRMSVGDRAAGSLPNYATINGKVSSSPVANGMAS--GSSTVSFSHTLPDFSKYSMPD |
| 07:10090 |  | 11219 |  | NM_027884    |  | Tns1 |  | Mus_musculus      | LPEKRRMSVGDRAAGSLPNYATINGKVSSSPVANGMAS--GSSTVSFSHTLPDFSKYSMPD |
| 07:10090 |  | 11219 |  | NM_177169    |  | Tns1 |  | Mus_musculus      | -----                                                         |
| 08:9031  |  | 11219 |  | NM_205455    |  | TNS1 |  | Gallus_gallus     | LPEKRRMSAGERSNSLPNYATVNGKAS-SPLSSGMSSPSSGSAAVAFSHTLPDFSKFSMPD |

|          |  |                                     |       |                |  |      |  |                   |                                                               |
|----------|--|-------------------------------------|-------|----------------|--|------|--|-------------------|---------------------------------------------------------------|
| 00:1     |  | Ac-AAPCVPPSNHELVPITTENAPKNVVDKGEASR | ----- |                |  |      |  |                   |                                                               |
| 01:9606  |  | 11219                               |       | 0#NP_001294951 |  | TNS1 |  | Homo_sapiens      | NSPETRAKVKFVQDTSKYWYKPEISREQAIALLLKDQEPGAFIIRDShSFRGAYGLAMKVS |
| 01:9606  |  | 11219                               |       | 0#NP_001294952 |  | TNS1 |  | Homo_sapiens      | NSPETRAKVKFVQDTSKYWYKPEISREQAIALLLKDQEPGAFIIRDShSFRGAYGLAMKVS |
| 01:9606  |  | 11219                               |       | 0#NP_072174    |  | TNS1 |  | Homo_sapiens      | NSPETRAKVKFVQDTSKYWYKPEISREQAIALLLKDQEPGAFIIRDShSFRGAYGLAMKVS |
| 01:9606  |  | 11219                               |       | NM_001308022   |  | TNS1 |  | Homo_sapiens      | NSPETRAKVKFVQDTSKYWYKPEISREQAIALLLKDQEPGAFIIRDShSFRGAYGLAMKVS |
| 01:9606  |  | 11219                               |       | NM_001308023   |  | TNS1 |  | Homo_sapiens      | NSPETRAKVKFVQDTSKYWYKPEISREQAIALLLKDQEPGAFIIRDShSFRGAYGLAMKVS |
| 01:9606  |  | 11219                               |       | NM_022648      |  | TNS1 |  | Homo_sapiens      | NSPETRAKVKFVQDTSKYWYKPEISREQAIALLLKDQEPGAFIIRDShSFRGAYGLAMKVS |
| 04:9913  |  | 11219                               |       | NM_174766      |  | TNS1 |  | Bos_taurus        | NSPETRAKVKFVQDTSKYWYKPEISREQAIALLLKDQEPGAFIIRDShSFRGAYGLAMKVS |
| 06:10116 |  | 11219                               |       | NM_001191810   |  | Tns1 |  | Rattus_norvegicus | NSPETRAKVKFVQDTSKYWYKPEISREQAIALLLKDQEPGAFIIRDShSFRGAYGLAMKVS |
| 07:10090 |  | 11219                               |       | NM_001289895   |  | Tns1 |  | Mus_musculus      | NSPETRAKVKFVQDTSKYWYKPEISREQAIALLLKDQEPGAFIIRDShSFRGAYGLAMKVS |
| 07:10090 |  | 11219                               |       | NM_027884      |  | Tns1 |  | Mus_musculus      | NSPETRAKVKFVQDTSKYWYKPEISREQAIALLLKDQEPGAFIIRDShSFRGAYGLAMKVS |
| 07:10090 |  | 11219                               |       | NM_177169      |  | Tns1 |  | Mus_musculus      | -----                                                         |
| 08:9031  |  | 11219                               |       | NM_205455      |  | TNS1 |  | Gallus_gallus     | ISPETRANVKFVQDTSKYWYKPDISREQAIALLLKDREPGAFIIRDShSFRGAYGLAMKVA |

|          |  |                                     |       |                |  |      |  |                   |                                                             |
|----------|--|-------------------------------------|-------|----------------|--|------|--|-------------------|-------------------------------------------------------------|
| 00:1     |  | Ac-AAPCVPPSNHELVPITTENAPKNVVDKGEASR | ----- |                |  |      |  |                   |                                                             |
| 01:9606  |  | 11219                               |       | 0#NP_001294951 |  | TNS1 |  | Homo_sapiens      | SPPTIMQONK-KDMTHELVRHFLIETGPRGVKLKGCNPNFNGSLSALVYQHSI IPLAL |
| 01:9606  |  | 11219                               |       | 0#NP_001294952 |  | TNS1 |  | Homo_sapiens      | SPPTIMQONKKGDMTHELVRHFLIETGPRGVKLKGCNPNFNGSLSALVYQHSI IPLAL |
| 01:9606  |  | 11219                               |       | 0#NP_072174    |  | TNS1 |  | Homo_sapiens      | SPPTIMQONKKGDMTHELVRHFLIETGPRGVKLKGCNPNFNGSLSALVYQHSI IPLAL |
| 01:9606  |  | 11219                               |       | NM_001308022   |  | TNS1 |  | Homo_sapiens      | SPPTIMQONK-KDMTHELVRHFLIETGPRGVKLKGCNPNFNGSLSALVYQHSI IPLAL |
| 01:9606  |  | 11219                               |       | NM_001308023   |  | TNS1 |  | Homo_sapiens      | SPPTIMQONKKGDMTHELVRHFLIETGPRGVKLKGCNPNFNGSLSALVYQHSI IPLAL |
| 01:9606  |  | 11219                               |       | NM_022648      |  | TNS1 |  | Homo_sapiens      | SPPTIMQONKKGDMTHELVRHFLIETGPRGVKLKGCNPNFNGSLSALVYQHSI IPLAL |
| 04:9913  |  | 11219                               |       | NM_174766      |  | TNS1 |  | Bos_taurus        | SPPTIMQONKKGDMTHELVRHFLIETGPRGVKLKGCNPNFNGSLSALVYQHSI IPLAL |
| 06:10116 |  | 11219                               |       | NM_001191810   |  | Tns1 |  | Rattus_norvegicus | SPPTITQQGKKGDMTHELVRHFLIETGPRGVKLKGCNPNFNGSLSALVYQHSI IPLAL |
| 07:10090 |  | 11219                               |       | NM_001289895   |  | Tns1 |  | Mus_musculus      | SPPTITQQGKKGDMTHELVRHFLIETGPRGVKLKGCNPNFNGSLSALVYQHSI IPLAL |
| 07:10090 |  | 11219                               |       | NM_027884      |  | Tns1 |  | Mus_musculus      | SPPTITQQGKKGDMTHELVRHFLIETGPRGVKLKGCNPNFNGSLSALVYQHSI IPLAL |
| 07:10090 |  | 11219                               |       | NM_177169      |  | Tns1 |  | Mus_musculus      | -----                                                       |
| 08:9031  |  | 11219                               |       | NM_205455      |  | TNS1 |  | Gallus_gallus     | SPPTVMQONKKGDI TNELVRHFLIETSPRGVKLKGCNPNFNGCLSALVYQHSI PLAL |

|          |  |                                     |       |                |  |      |  |                   |                                                              |
|----------|--|-------------------------------------|-------|----------------|--|------|--|-------------------|--------------------------------------------------------------|
| 00:1     |  | Ac-AAPCVPPSNHELVPITTENAPKNVVDKGEASR | ----- |                |  |      |  |                   |                                                              |
| 01:9606  |  | 11219                               |       | 0#NP_001294951 |  | TNS1 |  | Homo_sapiens      | PCKLVIPNRDPTDESKDSSGPANSTADLLKQGAACNVLFVNSVDMESLTGPQAISKATSE |
| 01:9606  |  | 11219                               |       | 0#NP_001294952 |  | TNS1 |  | Homo_sapiens      | PCKLVIPNRDPTDESKDSSGPANSTADLLKQGAACNVLFVNSVDMESLTGPQAISKATSE |
| 01:9606  |  | 11219                               |       | 0#NP_072174    |  | TNS1 |  | Homo_sapiens      | PCKLVIPNRDPTDESKDSSGPANSTADLLKQGAACNVLFVNSVDMESLTGPQAISKATSE |
| 01:9606  |  | 11219                               |       | NM_001308022   |  | TNS1 |  | Homo_sapiens      | PCKLVIPNRDPTDESKDSSGPANSTADLLKQGAACNVLFVNSVDMESLTGPQAISKATSE |
| 01:9606  |  | 11219                               |       | NM_001308023   |  | TNS1 |  | Homo_sapiens      | PCKLVIPNRDPTDESKDSSGPANSTADLLKQGAACNVLFVNSVDMESLTGPQAISKATSE |
| 01:9606  |  | 11219                               |       | NM_022648      |  | TNS1 |  | Homo_sapiens      | PCKLVIPNRDPTDESKDSSGPANSTADLLKQGAACNVLFVNSVDMESLTGPQAISKATSE |
| 04:9913  |  | 11219                               |       | NM_174766      |  | TNS1 |  | Bos_taurus        | PCKLVIPNRDPTDESKDSSGPANSTSDLLKQGAACNVLFVNSVDMESLTGPQAISKAISE |
| 06:10116 |  | 11219                               |       | NM_001191810   |  | Tns1 |  | Rattus_norvegicus | PCKLVIPSRDPTDESKDSSGPANSTTDLLKQGAACNVLFINSVDMESLTGPQAISKATSE |
| 07:10090 |  | 11219                               |       | NM_001289895   |  | Tns1 |  | Mus_musculus      | PCKLVIPSRDPTDESKDSSGPANSTTDLLKQGAACNVLFVNSVDMESLTGPQAISKATSE |
| 07:10090 |  | 11219                               |       | NM_027884      |  | Tns1 |  | Mus_musculus      | PCKLVIPSRDPTDESKDSSGPANSTTDLLKQGAACNVLFVNSVDMESLTGPQAISKATSE |
| 07:10090 |  | 11219                               |       | NM_177169      |  | Tns1 |  | Mus_musculus      | -----                                                        |
| 08:9031  |  | 11219                               |       | NM_205455      |  | TNS1 |  | Gallus_gallus     | PCKLVIPDRDPMEEKDAASTTNSATDLLKQGAACNVLFINSVEMESLTGPQAISKAIAE  |

|          |  |                                     |       |                |  |      |  |                   |                                                             |
|----------|--|-------------------------------------|-------|----------------|--|------|--|-------------------|-------------------------------------------------------------|
| 00:1     |  | Ac-AAPCVPPSNHELVPITTENAPKNVVDKGEASR | ----- |                |  |      |  |                   |                                                             |
| 01:9606  |  | 11219                               |       | 0#NP_001294951 |  | TNS1 |  | Homo_sapiens      | TLAADPTPAATIVHFKVSAQGITLTDNQKRLFRRHYPLNTVTFCDLDPQERKWMKTEGG |
| 01:9606  |  | 11219                               |       | 0#NP_001294952 |  | TNS1 |  | Homo_sapiens      | TLAADPTPAATIVHFKVSAQGITLTDNQKRLFRRHYPLNTVTFCDLDPQERKWMKTEGG |
| 01:9606  |  | 11219                               |       | 0#NP_072174    |  | TNS1 |  | Homo_sapiens      | TLAADPTPAATIVHFKVSAQGITLTDNQKRLFRRHYPLNTVTFCDLDPQERKWMKTEGG |
| 01:9606  |  | 11219                               |       | NM_001308022   |  | TNS1 |  | Homo_sapiens      | TLAADPTPAATIVHFKVSAQGITLTDNQKRLFRRHYPLNTVTFCDLDPQERKWMKTEGG |
| 01:9606  |  | 11219                               |       | NM_001308023   |  | TNS1 |  | Homo_sapiens      | TLAADPTPAATIVHFKVSAQGITLTDNQKRLFRRHYPLNTVTFCDLDPQERKWMKTEGG |
| 01:9606  |  | 11219                               |       | NM_022648      |  | TNS1 |  | Homo_sapiens      | TLAADPTPAATIVHFKVSAQGITLTDNQKRLFRRHYPLNTVTFCDLDPQERKWMKTEGG |
| 04:9913  |  | 11219                               |       | NM_174766      |  | TNS1 |  | Bos_taurus        | TLAADPTPAATIVHFKVSAQGITLTDNQKRLFRRHYPLNTVTFCDLDPQERKWTKTEGG |
| 06:10116 |  | 11219                               |       | NM_001191810   |  | Tns1 |  | Rattus_norvegicus | TLAADPTPAATIVHFKVSAQGITLTDNQKRLFRRHYPLNTVTFCDLDPQERKWMKTEGG |
| 07:10090 |  | 11219                               |       | NM_001289895   |  | Tns1 |  | Mus_musculus      | TLAADPTPAATIVHFKVSAQGITLTDNQKRLFRRHYPLNTVTFCDLDPQERKWMKTEGG |
| 07:10090 |  | 11219                               |       | NM_027884      |  | Tns1 |  | Mus_musculus      | TLAADPTPAATIVHFKVSAQGITLTDNQKRLFRRHYPLNTVTFCDLDPQERKWMKTEGG |
| 07:10090 |  | 11219                               |       | NM_177169      |  | Tns1 |  | Mus_musculus      | -----                                                       |
| 08:9031  |  | 11219                               |       | NM_205455      |  | TNS1 |  | Gallus_gallus     | TLVADPTPTATIVHFKVSAQGITLTDNQKRLFRRHYPLNTVTFCDLDPQERKWTKTDGS |

|          |  |                                     |       |                |  |      |  |                   |                                                      |
|----------|--|-------------------------------------|-------|----------------|--|------|--|-------------------|------------------------------------------------------|
| 00:1     |  | Ac-AAPCVPPSNHELVPITTENAPKNVVDKGEASR | ----- |                |  |      |  |                   |                                                      |
| 01:9606  |  | 11219                               |       | 0#NP_001294951 |  | TNS1 |  | Homo_sapiens      | APAKLFGFVARKQGSTTDNACHLFAELDPNQPASAI VNFVSKVMLNAGQKR |
| 01:9606  |  | 11219                               |       | 0#NP_001294952 |  | TNS1 |  | Homo_sapiens      | APAKLFGFVARKQGSTTDNACHLFAELDPNQPASAI VNFVSKVMLNAGQKR |
| 01:9606  |  | 11219                               |       | 0#NP_072174    |  | TNS1 |  | Homo_sapiens      | APAKLFGFVARKQGSTTDNACHLFAELDPNQPASAI VNFVSKVMLNAGQKR |
| 01:9606  |  | 11219                               |       | NM_001308022   |  | TNS1 |  | Homo_sapiens      | APAKLFGFVARKQGSTTDNACHLFAELDPNQPASAI VNFVSKVMLNAGQKR |
| 01:9606  |  | 11219                               |       | NM_001308023   |  | TNS1 |  | Homo_sapiens      | APAKLFGFVARKQGSTTDNACHLFAELDPNQPASAI VNFVSKVMLNAGQKR |
| 01:9606  |  | 11219                               |       | NM_022648      |  | TNS1 |  | Homo_sapiens      | APAKLFGFVARKQGSTTDNACHLFAELDPNQPASAI VNFVSKVMLNAGQKR |
| 04:9913  |  | 11219                               |       | NM_174766      |  | TNS1 |  | Bos_taurus        | APAKLFGFVARKQGSATDNACHLFAELDPNQPASAI VSFVSKVMLSAGQKR |
| 06:10116 |  | 11219                               |       | NM_001191810   |  | Tns1 |  | Rattus_norvegicus | APAKLFGFVARKQGSTTDNACHLFAELDPNQPASAI VNFVSKVMLSAGQKR |
| 07:10090 |  | 11219                               |       | NM_001289895   |  | Tns1 |  | Mus_musculus      | APAKLFGFVARKQGSTTDNACHLFAELDPNQPASAI VNFVSKVMLSAGQKR |
| 07:10090 |  | 11219                               |       | NM_027884      |  | Tns1 |  | Mus_musculus      | APAKLFGFVARKQGSTTDNACHLFAELDPNQPASAI VNFVSKVMLSAGQKR |
| 07:10090 |  | 11219                               |       | NM_177169      |  | Tns1 |  | Mus_musculus      | -----                                                |
| 08:9031  |  | 11219                               |       | NM_205455      |  | TNS1 |  | Gallus_gallus     | GPAKLFGFVARKQGSTTDNVCHLFAELDPDQAAAIVNFVSRVMLGSGQKR   |

*GYS1*

Ac-MEIPGAPLPAPAMPLNR

```
00:1|Ac-MEIPGAPLPAPAMPLNR
01:9606|113557|0|NP_001155059|GYS1|Homo_sapiens
01:9606|113557|0|NP_002094|GYS1|Homo_sapiens
01:9606|113557|NM_001161587|GYS1|Homo_sapiens
01:9606|113557|NM_002103|GYS1|Homo_sapiens
03:9544|113557|NM_001032886|GYS1|Macaca_mulatta
04:9913|113557|NM_001024515|GYS1|Bos_taurus
04:9913|113557|NM_001101299|GYS1|Bos_taurus
06:10116|113557|NM_001109615|GYS1|Rattus_norvegicus
07:10090|113557|NM_030678|GYS1|Mus_musculus
10:7955|113557|NM_201180|gys1|Danio_rerio
13:6239|113557|NM_064335|gys-1|Caenorhabditis_elegans
```

```
00:1|Ac-MEIPGAPLPAPAMPLNR
01:9606|113557|0#NP_001155059|GYS1|Homo_sapiens
01:9606|113557|0#NP_002094|GYS1|Homo_sapiens
01:9606|113557|NM_001161587|GYS1|Homo_sapiens
01:9606|113557|NM_002103|GYS1|Homo_sapiens
03:9544|113557|NM_001032886|GYS1|Macaca_mulatta
04:9913|113557|NM_001024515|GYS1|Bos_taurus
04:9913|113557|NM_001101299|GYS1|Bos_taurus
06:10116|113557|NM_001109615|GYS1|Rattus_norvegicus
07:10090|113557|NM_030678|GYS1|Mus_musculus
10:7955|113557|NM_201180|gys1|Danio_rio
13:6239|113557|NM_064335|gys-1|Caenorhabditis_elegans
```

```
00:1|Ac-MEIPGAPLPAPAMPLNR
01:9606|113557|0#NP_001155059|GYS1|Homo_sapiens
01:9606|113557|0#NP_002094|GYS1|Homo_sapiens
01:9606|113557|NM_001161587|GYS1|Homo_sapiens
01:9606|113557|NM_002103|GYS1|Homo_sapiens
03:9544|113557|NM_001032886|GYS1|Macaca_mulatta
04:9913|113557|NM_001024515|GYS1|Bos_taurus
04:9913|113557|NM_001101299|GYS1|Bos_taurus
06:10116|113557|NM_001109615|Gys1|Rattus_norvegicus
07:10090|113557|NM_030678|Gys1|Mus_musculus
10:7955|113557|NM_201180|gys1|Danio_erio
13:6239|113557|NM_064335|gsy-1|Caenorhabditis_elegans
```

```

00:1|Ac-MEIPGAPLPAPAMPLNR
01:9606|113557|0|NP_001155059|GYS1|Homo_sapiens
01:9606|113557|0|NP_002094|GYS1|Homo_sapiens
01:9606|113557|NM_001161587|GYS1|Homo_sapiens
01:9606|113557|NM_002103|GYS1|Homo_sapiens
03:9544|113557|NM_001032886|GYS1|Macaca_mulatta
04:9913|113557|NM_001024515|GYS1|Bos_taurus
04:9913|113557|NM_001101299|GYS1|Bos_taurus
06:10116|113557|NM_001109615|Gys1|Rattus_norvegicus
07:10090|113557|NM_030678|Gys1|Mus_musculus
10:7955|113557|NM_201180|gys1|Danio_rio
13:6239|113557|NM_064335|gys-1|Caenorhabditis_elegans

```

```
00:1|Ac-MEIPGAPLPAPAMPLNR
01:9606|113557|0|NP_001155059|GYS1|Homo_sapiens
01:9606|113557|0|NP_002094|GYS1|Homo_sapiens
01:9606|113557|NM_001161587|GYS1|Homo_sapiens
01:9606|113557|NM_002103|GYS1|Homo_sapiens
03:9544|113557|NM_001032886|GYS1|Macaca_mulatta
04:9913|113557|NM_001024515|GYS1|Bos_taurus
04:9913|113557|NM_001101299|GYS1|Bos_taurus
06:10116|113557|NM_001109615|Gys1|Rattus_norvegicus
07:10090|113557|NM_030678|Gys1|Mus_musculus
10:7955|113557|NM_201180|gys1|Danio_riero
13:6239|113557|NM_064335|gys-1|Caenorhabditis_elegans
```

```
00:1|Ac-MEIPGAPLPAPAMPLNR
01:9606|113557|0#NP_001155059|GYS1|Homo_sapiens
01:9606|113557|0#NP_002094|GYS1|Homo_sapiens
01:9606|113557|NM_001161587|GYS1|Homo_sapiens
01:9606|113557|NM_002103|GYS1|Homo_sapiens
03:9544|113557|NM_001032886|GYS1|Macaca_mulatta
04:9913|113557|NM_001024515|GYS1|Bos_taurus
04:9913|113557|NM_001101299|GYS1|Bos_taurus
06:10116|113557|NM_001109615|Gys1|Rattus_norvegicus
07:10090|113557|NM_030678|Gys1|Mus_musculus
10:7955|113557|NM_201180|gys1|Danio_rio
13:6239|113557|NM_064335|gys-1|Caenorhabditis_elegans
```

-----  
VDKEAGERQIYHRYCMERAAAAHCAHVFTTTSQITAEAQHLLKRKPDIVTPNGLNVKKFS  
LDAEAGKKIYHOYCLERAACOTAHFTTTSQITAEAEHLLKRKPDIVTPNGLNVKKFS  
-----

AMHEFQNLHAQSKARIQEFVRGHFYGHLD FNLDKTL YFFIAGRYEFSNKGADV FLEALAR  
AMHEFQNLHAQSKARIQEFVRGHFYGHLD FNLDKTL YFFIAGRYEFSNKGADIFLEALAR  
AMHEFQNLHAQSKARIQEFVRGHFYGHLD FNLDKTL YFFIAGRYEFSNKGADV FLEALAR  
AMHEFQNLHAQSKARIQEFVRGHFYGHLD FNLDKTL YFFIAGRYEFSNKGADIFLEALAR  
ALHEFQNLHAQNKKEKINQFIRGHFPHGHLDFDLDKTL YFFIAGRYEFSNKGDMFIFLEALAR

```

LNYYLLRVNG---SEQTVAFFIMPARTNNFNVETLKGQAVRKQLWDTANTVKEKFGRKL
LNYYLLRVNG---SEQTVAFFIMPARTNNFNVETLKGQAVRKQLWDTANTVKEKFGRKL
LNYYLLRVNG---SEQTVAFFIMPARTNNFNVETLKGQAVRKQLWDTANTVKEKFGRKL
LNYYLLRVNG---SEQTVAFFIMPARTNNFNVETLKGQAVRKQLWDTANTVKEKFGRKL
LNYYLLRVNG---SEQTVALFIMPARTNNFNVETLKGQAVRKQLWDTANTVKEKFGRKL
LNYYLLRVNG---SEQTVAFFIMPARTNNFNVETLKGQAVRKQLWDTANTVKEKFGRKL
LNYYLLRVNG---SEQTVAFFIMPARTNNFNVETLKGQAVRKQLWDTANTVKEKFGRKL
LNYYLLRVNG---SEQTVAFFIMPARTNNFNVETLKGQAVRKQLWDTANTVKEKFGRKL
LNYYLLRVNG---SEQTVAFFIMPARTNNFNVETLKGQAVRKQLWDTANTVKEKFGRKL
LNYYLLRVNGH---SEVTVAFFIMPARTNNFNVETLKGQAVRKQLWDTAQSVEKFGRKL
LNHYLTKTSDPRHMGVTVVAFLIYPAPANSFNVESLKGQAVTQQLKEAVDRICEKVGQR

```

[illegible]

LFNSSADRVKVI FHPEFLSSTSP LLPVDYEEFVRGCHLGVPFSYYEPWGYTPAECTVMGI  
LFNSAQDRVKVI FHPEFLSSTSP LLPMDYEEFVRGCHLGVPFSYYEPWGYTPAECTVMGI  
LFNKPEDRVKVI FHPEFLSSVSP LIGLDYEDFVRGCHLGVPFSYYEPWGYTPAECTVMGI

[illegible]

QNRNTERLSDLLDWKYLGRYYMSARHMALSKAFPEHFTYEPNEADAAQGYRYPRASVPP  
QNRNTERLSDLLDWKYLGRYYMSARHMALSKAFPEHFTYEPNEADAAQGYRYPRASVPP  
QNRNTERLSDLLDWKYLGRYYMSARHMALSKAFPEHFTYEPNEADAAQGYRYPRASVPP  
QNRNTERLSDLLDWKYLGRYYMSARHMALSKAFPEHFTYEPNEADAAQGYRYPRASVPP  
QNRNTERLSDLLDWKYLGRYYMSARHMALSKAFPEHFTYEPSEADAAQGYRYPRASVPP  
QNRNTERLSDLLDWKYLXRV-----  
QNRNTERLSDLLDWKYLGRYYMSARHMALAKAFPEYFTYEPHEADATQGYRYPRASVPP  
QNRNTERLSDLLDWKYLGRYYMSARHMALAKAFPDHFTYEPHEVDATQGYRYPRASVPP  
QNRNTERLSDLLDWKYLGRYYMSARHMALAKAFPDHFTYEPHEVDATQGYRYPRASVPP  
QNRNTERLSDLLDWRYLGRYYVSARHLALAKAYPDTHYIEBPQESSAAGFRYPRASVPP  
LRNSNEGLSALLDWQNLGVFYRDCRRLALERLHPVDKIMRDN-----GKVP

-----

|          |        |                |       |                        |                                                              |
|----------|--------|----------------|-------|------------------------|--------------------------------------------------------------|
| 01:9606  | 113557 | 0#NP_001155059 | GYS1  | Homo_sapiens           | SPSLSRHSSPHQSEDEEDPRNGPLEEDGERYDEDEEAAKDRRNIRAPEWPRRASCTSSTS |
| 01:9606  | 113557 | 0#NP_002094    | GYS1  | Homo_sapiens           | SPSLSRHSSPHQSEDEEDPRNGPLEEDGERYDEDEEAAKDRRNIRAPEWPRRASCTSSTS |
| 01:9606  | 113557 | NM_001161587   | GYS1  | Homo_sapiens           | SPSLSRHSSPHQSEDEEDPRNGPLEEDGERYDEDEEAAKDRRNIRAPEWPRRASCTSSTS |
| 01:9606  | 113557 | NM_002103      | GYS1  | Homo_sapiens           | SPSLSRHSSPHQSEDEEDPRNGPLEEDGERYDEDEEAAKDRRNIRAPEWPRRASCTSSTS |
| 03:9544  | 113557 | NM_001032886   | GYS1  | Macaca_mulatta         | SPSLSRHSSPHQSEDEEDPRNGPLEEDSERYDEDEEAAKDRRNIRAPEWPRRASCTSSTS |
| 04:9913  | 113557 | NM_001024515   | GYS1  | Bos_taurus             | -----                                                        |
| 04:9913  | 113557 | NM_001101299   | GYS1  | Bos_taurus             | SPSLSRHSSPHQSEDEEEPRDLPPDEDDERYDEDEEAAKDRRNIRAPEWPRRASCTSS-T |
| 06:10116 | 113557 | NM_001109615   | Gys1  | Rattus_norvegicus      | SPSLSRHSSPHQSEDEEEPRDGPLREDSEYDEEEAAKDRRNIRAPEWPRRASCSSTG    |
| 07:10090 | 113557 | NM_030678      | Gys1  | Mus_musculus           | SPSLSRHSSPHQSEDEEEPRDGPLGEDSEYDEEEAAKDRRNIRAPEWPRRASCSSTG    |
| 10:7955  | 113557 | NM_201180      | gys1  | Danio_rerio            | SPAHS LHSSPHHSEAEDE-----E EPYDE DLEAEKDRVNIRQPYNL PNRNKNQT-V |
| 13:6239  | 113557 | NM_064335      | gsy-1 | Caenorhabditis_elegans | SAATSRRPSIHSSDGEDDE-----                                     |

|          |                      |                |       |                        |                                    |
|----------|----------------------|----------------|-------|------------------------|------------------------------------|
| 00:1     | Ac-MEIPGAPLPAPAMPLNR |                |       |                        | -----                              |
| 01:9606  | 113557               | 0#NP_001155059 | GYS1  | Homo_sapiens           | GSKR-NSVDTATSSSLSTPSEPLSPTSSLGEERN |
| 01:9606  | 113557               | 0#NP_002094    | GYS1  | Homo_sapiens           | GSKR-NSVDTATSSSLSTPSEPLSPTSSLGEERN |
| 01:9606  | 113557               | NM_001161587   | GYS1  | Homo_sapiens           | GSKR-NSVDTATSSSLSTPSEPLSPTSSLGEERN |
| 01:9606  | 113557               | NM_002103      | GYS1  | Homo_sapiens           | GSKR-NSVDTATSSSLSTPSEPLSPTSSLGEERN |
| 03:9544  | 113557               | NM_001032886   | GYS1  | Macaca_mulatta         | GSKR-NSVDTATSSSLSTPSEPLSPTSSLGEERN |
| 04:9913  | 113557               | NM_001024515   | GYS1  | Bos_taurus             | -----                              |
| 04:9913  | 113557               | NM_001101299   | GYS1  | Bos_taurus             | GSKR-GSVDTAPSSSVSTPSEPLSPASSLGEERN |
| 06:10116 | 113557               | NM_001109615   | Gys1  | Rattus_norvegicus      | GSKRSNSVDTGPSSSLSTPTEPLSPTSSLGEERN |
| 07:10090 | 113557               | NM_030678      | Gys1  | Mus_musculus           | GSKRSNSVDTGPSSSLSTPTEPLSPTSSLGEERN |
| 10:7955  | 113557               | NM_201180      | gys1  | Danio_rerio            | GLPEKN-----                        |
| 13:6239  | 113557               | NM_064335      | gsy-1 | Caenorhabditis_elegans | -----                              |

*MORC4*

Ac-AAKKMLLYR

|          |                                         |                                                                   |  |  |  |
|----------|-----------------------------------------|-------------------------------------------------------------------|--|--|--|
|          |                                         |                                                                   |  |  |  |
| 00:1     | Ac-AAKMLLYR                             | -----                                                             |  |  |  |
| 01:9606  | 11644 0#NP_001078823 MORC4 Homo_sapiens | ----                                                              |  |  |  |
| 01:9606  | 11644 0#NP_078933 MORC4 Homo_sapiens    | ----                                                              |  |  |  |
| 01:9606  | 11644 NM_001085354 MORC4 Homo_sapiens   | -----                                                             |  |  |  |
| 01:9606  | 11644 NM_024657 MORC4 Homo_sapiens      | -----                                                             |  |  |  |
| 03:9544  | 11644 NM_001266454 MORC4 Macaca_mulatta | -----                                                             |  |  |  |
| 04:9913  | 11644 NM_001102230 MORC4 Bos_taurus     | -----                                                             |  |  |  |
| 07:10090 | 11644 NM_001193309 Morc4 Mus_musculus   | ISVPRPGSPGSRWVRRGADKAGRADAGFLRLHP SRWGQVA AARPASASC EWERERAS PGRR |  |  |  |
| 07:10090 | 11644 NM_029413 Morc4 Mus_musculus      | ISVPRPGSPGSRWVRRGADKAGRADAGFLRLHP SRWGQVA AARPASASC EWERERAS PGRR |  |  |  |

|          |              |                |                      |  |  |                                                              |
|----------|--------------|----------------|----------------------|--|--|--------------------------------------------------------------|
|          |              |                |                      |  |  |                                                              |
| 00:1     | Ac-AAKMMLLYR |                |                      |  |  | -----                                                        |
| 01:9606  | [16644]      | 0#NP_001078823 | MORC4 Homo_sapiens   |  |  | FGIRLSTMSPRYLQSNSSSHTRPFSIAAELLDNAVDDPVSARTVFIDVEEVKNKSCLTFT |
| 01:9606  | [16644]      | 0#NP_078933    | MORC4 Homo_sapiens   |  |  | FGIRLSTMSPRYLQSNSSSHTRPFSIAAELLDNAVDDPVSARTVFIDVEEVKNKSCLTFT |
| 01:9606  | [16644]      | NM_001085354   | MORC4 Homo_sapiens   |  |  | FGIRLSTMSPRYLQSNSSSHTRPFSIAAELLDNAVDDPVSARTVFIDVEEVKNKSCLTFT |
| 01:9606  | [16644]      | NM_024657      | MORC4 Homo_sapiens   |  |  | FGIRLSTMSPRYLQSNSSSHTRPFSIAAELLDNAVDDPVSARTVFIDVEEVKNKSCLTFT |
| 03:9544  | [16644]      | NM_001266454   | MORC4 Macaca_mulatta |  |  | FGIRLSTMSPRYLQSNSSSHTRPFSIAAELLDNAVDDPVSARTVFIDVEEVKNKSCLTFT |
| 04:9913  | [16644]      | NM_001102230   | MORC4 Bos_taurus     |  |  | -----                                                        |
| 07:10090 | [16644]      | NM_001193309   | MORC4 Mus_musculus   |  |  | FRIRLSTMSPRYLQSNSSSHTRPFSIAAELLDNAVDDPVSARTVFIDVEEVKKPKCLTFT |
| 07:10090 | [16644]      | NM_029413      | MORC4 Mus_musculus   |  |  | FRIRLSTMSPRYLQSNSSSHTRPFSIAAELLDNAVDDPVSARTVFIDVEEVKKPKCLTFT |

```

00:1|Ac-AAKMLLYR-----
01:9606|11644|0[NP_001078823|MORC4|Homo_sapiensVGLLSQTYLECVQAQAVIVPVPFNQNKMMIITEDSLPSLEAILNYSIFNRENDLLAQF
01:9606|11644|0[NP_078933|MORC4|Homo_sapiensVGLLSQTYLECVQAQAVIVPVPFNQNKMMIITEDSLPSLEAILNYSIFNRENDLLAQF
01:9606|11644|NM_001085354|MORC4|Homo_sapiensVGLLSQTYLECVQAQAVIVPVPFNQNKMMIITEDSLPSLEAILNYSIFNRENDLLAQF
01:9606|11644|NM_024657|MORC4|Homo_sapiensVGLLSQTYLECVQAQAVIVPVPFNQNKMMIITEDSLPSLEAILNYSIFNRENDLLAQF
03:9544|11644|NM_001266454|MORC4|Macaca_mulattaVGLLSQTYLECVQAQAVIVPVPFNQNKMMIITEDSLPSLEAILNYSIFNRENDLLAQF
04:9913|11644|NM_001102230|MORC4|Bos_taurus-----
07:10090|11644|NM_001193309|MORC4|Mus_musculusVGLLSQTYLECIQAQAVIVPVPFSQNKMMIITEDSLPSLEAILNYSIFNCEKDLLSQF
07:10090|11644|NM_029413|MORC4|Mus_musculusVGLLSQTYLECIQAQAVIVPVPFSQNKMMIITEDSLPSLEAILNYSIFNCEKDLLSQF

```

```
00:01|Ac-AAKMLLYR-----
01:9606|11644|0#NP_001078823|MORC4|Homo_sapiens|LRAFCGILYMKPRMKIFLFRQKKVTTQMIAKSLANVEYDITYKPTFTNKQVRITFGFSCKNS
01:9606|11644|0#NP_078933|MORC4|Homo_sapiens|LRAFCGILYMKPRMKIFLFRQKKVTTQMIAKSLANVEYDITYKPTFTNKQVRITFGFSCKNS
01:9606|11644|NM_001085354|MORC4|Homo_sapiens|LRAFCGILYMKPRMKIFLFRQKKVTTQMIAKSLANVEYDITYKPTFTNKQVRITFGFSCKNS
01:9606|11644|NM_024657|MORC4|Homo_sapiens|LRAFCGILYMKPRMKIFLFRQKKVTTQMIAKSLANVEYDITYKPTFTNKQVRITFGFSCKNS
03:9544|11644|NM_001266454|MORC4|Macaca_mulatta|LRAFCGILYMKPRMKIFLFRQKKVTTQMIAKSLANVEYDITYKPTFTNKQVRITFGFSCKNS
04:9913|11644|NM_001102230|MORC4|Bos_taurus|-----
07:10090|11644|NM_001193309|MORC4|Mus_musculus|LRAFCSILYMKPRMKIFLFRQKKVTTQMIAKSLANVEYDIYKPTSTNKQVRITFGFSCKYH
07:10090|11644|NM_029413|MORC4|Mus_musculus|LRAFCSILYMKPRMKIFLFRQKKVTTQMIAKSLANVEYDIYKPTSTNKQVRITFGFSCKYH
```

NQFGVMMYHNNRLIKAFEKAGCQLKPTCGEGVGVIGVIECNFLKPAYNKQDFEYTKEYRL  
NQFGVMMYHNNRLIKAFEKAGCQLKPTCGEGVGVIGVIECNFLKPAYNKQDFEYTKEYRL

TINALAQKLNAYWKEKTSQDNFETSTVARIPKVPDQTWVQCDECLKWRKLPKGIDPSML  
TINALAQKLNAYWKEKTSQDNFETSTVARIPKVPDQTWVQCDECLKWRKLPKGIDPSML  
TINALAQKLNAYWKEKTSQDNFETSTVARIPKVPDQTWVQCDECLKWRKLPKGIDPSML  
TINALAQKLNAYWKEKTSQDNFETSTVARIPKVPDQTWVQCDECLKWRKLPKGIDPSML  
TINALAQKLNAYWKEKTSQDNFETSAVARIPRVPDQTWVQCDECLKWRKLPKGIDPSML  
TINALARKLNAYWKEKISQENFEPLPTS---RRIPDQTWVQCDECLKWRRLPGMVDPSLT  
TINALARKLNAYWKEKISQENFEPLPTS---RRIPDQTWVQCDECLKWRRLPGMVDPSLT

PARWFCYYNSHPKYRRCVSPVEEQELTDEDLCLSKAKKQEQTVEEKKKMPMENENHQVFSN  
PARWFCYYNSHPKYRRCVSPVEEQELTDEDLCLSKAKKQEQTVEEKKKMPMENENHQVFSN  
PARWFCYYNSHPKYRRCVSPVEEQELTDEDLCLSKAKKQEQTVEEKKKMPMENENHQVFSN  
PARWFCYYNSHPKYRRCVSPVEEQELTDEDLCLSKAKKQEQTVEEKKKMPMENENHQVFSN  
PARWFCYYNSHPKYRRCVSPVEEHLIDEDLCLSKAKKQEQTVEEKKKMPMENENHQVFSN  
-AFTN  
PARWFCYYNSHPKFKRCVSPVEEQERIDEDLHRSAKQQVE-AAEKKQKPMESDKYQVFSN  
PARWFCYYNSHPKFKRCVSPVEEQERIDEDLHRSAKQQVE-AAEKKQKPMESDKYQVFSN

PPKILTVQEMAGLNKKTIGYEGIHSPSVLPSGGEESRSPSLQLKPLDSSVLQFSSKYKWI  
PPKILTVQEMAGLNKKTIGYEGIHSPSVLPSGGEESRSPSLQLKPLDSSVLQFSSKYKWI  
PPKILTVQEMAGLNKKTIGYEGIHSPSVLPSGGEESRSPSLQLKPLDSSVLQFSSKYKWI  
PPKILTVQEMAGLNKKTIGYEGIHSPSVLPSGGEESRSPSLQLKPLDSSVLQFSSKYKWI  
PPKILTIQEMAGLNKKTIGYEGIHSPSVLPSGGEESRSPSLQLKPLDSSVQFSSKYKWI  
PLKIPSIQDMDLNDKKTIGYEGTDSPSRLSSVGEESRTTQLKPLDSSIQFSSKYKWI  
PKPTPLQDMAELNDKKTIGYEQINSPSLPSVREESRSP-RLKSLDSSAFQISRKYKLI  
PPKTPQLQDMAELNDKKTIGYEQINSPSLPSVREESRSP-RLKSLDSSAFQISRKYKLI

LGEEPVEKRRRLQNMETTPSLDYSMPAPYRRVEAPVAYPEGENSHDKSSSERSTPPYLPF  
 LGEEPVEKRRRLQNMETTPSLDYSMPAPYRRVEAPVAYPEGENSHDKSSSERSTPPYLPF  
 LGEEPVEKRRRLQNMETTPSLDYSMPAPYRRVEAPVAYPEGENSHDKSSSERSTPPYLPF  
 LGEEPVEKRRRLQNMETTPSLDYSMPAPYRRVEAPVAYPEGENSHDKSSSERSTPPYLPF  
 LGEEPVEKRRRLQNMETTPSLDYSMPAPYRRVEAPVAYPEGENSHDKSSSERSTPPYLPF  
 LGEEPVEKRRRLQDEMTPPLDYSMPGYPYRKVEAAVANPEGENSPDKSSSERSTPPYLPF  
 LGEEPVEKRRRLQTEMPLSPIDYMSGFYRRVEAATAYPEGENSPDKCSSERSTPPHLPF  
 LGEEPVEKRRRLQTEMPLSPIDYMSGFYRRVEAATAYPEGENSPDKCSSERSTPPHLPF

EYPEASKNTGQNREVSILYPGAKDQRQGSLLPEELEDQMPRLVAEESNRGSTTINKEEVN  
EYPEASKNTGQNREVSILYPGAKDQRQGSLLPEELEDQMPRLVAEESNRGSTTINKEEVN  
EYPEASKNTGQNREVSILYPGAKDQRQGSLLPEELEDQMPRLVAEESNRGSTTINKEEVN  
EYPEASKNTGQNREVSILYPGAKDQRQGSLLPEELEDQMPRLVAEESNRGSTTINKEEVN  
EYPEASKNTGQNREVSILYPGTDQRQGSLLPEELEDQMPRLVAEESNRSTTINKEEVN  
EYPEAIKSTSQSREASVLYSGAQDQHQSLLPEELEDQMPRLVAEDSNRGNTHVNKEEVS  
EYPSNKHTEENREAPALCPGSDQDQDQGLLPEELEDQMPKLVAEESNRSENIDK-DMN  
EYPSNKHTEENREAPALCPGSDQDQDQGLLPEELEDQMPKLVAEESNRSENIDK-DMN

KGPFVAVVGVAKGVRDSGAPIQLIPFNREELEARRKAVESWNVP-PYSVASAAIPAAAIIG  
KGPFVAVVGVAKGVRDSGAPIQLIPFNREELEARRKAVESWNVP-PYSVASAAIPAAAIIG  
KGPFVAVVGVAKGVRDSGAPIQLIPFNREELEARRKAVESWNVP-PYSVASAAIPAAAIIG  
KGPFVAVVGVAKGVRDSGAPIQLIPFNREELEARRKAVESWNVP-PYSVASAAIPAAAIIG  
KGPFVAVVGVAKGVRDSGAPIQLIPFNREELEARRKAVESWNVP-PYSVASAAIPAAATG  
KGPFVAVVGVAKGVRDSGAPIQLIPFNREELEARRKAESLNPVPYSSVASAPAAVA  
KGPFVAVVGVAKGVADS GAPIQLVFPNREEFVGKRKAESWKRPYSSAA----PAATA  
KGPFVAVVGVAKGVADS GAPIQLVFPNREEFVGKRKAESWKRPYSSAA----PAATA

-----  
EKARGYEESGHNTPKLNQRELEELKRTTEKLERVLAERNLFQOKVEELEQERNHWQSE  
EKARGYEESGHNTPKLNQRELEELKRTTEKLERVLAERNLFQOKVEELEQERNHWQSE  
EKARGYEESGHNTPKLNQRELEELKRTTEKLERVLAERNLFQOKVEELEQERNHWQSE  
EKARGYEESGHNTPKLNQRELEELKRTTEKLERVLAERNLFQOKVEELEQERNHWQSE  
EKGRGYEENGRNTPKMNQRELEELKRTTEKLERVLAERNLFQOKVEELEQERNHWQSE  
EKGRGYEESGGRNIPKMNQRELEELKRTAEKLERVLAERNMFQOKVEELEQERNHHWSK  
GKGKQCDQDSRRNMPK1KTPKESELKRTTEKLERVLAERNLFQOKVEELEQERNHHWSK  
GKGKQCDQDSRRNMPK1KTPKESELKRTTEKLERVLAERNLFQOKVEELEQERNHHWSK  
-----

-----  
FKKVQHELVIYSTQAEGLYWSKKHMGYRQAEFQILKAELERTKEEQELKEKLKETETH  
FKKVQHELVIYSTQAEGLYWSKKHMGYRQAEFQILKAELERTKEEQELKEKLKETETH  
FKKVQHELVIYSTQAEGLYWSKKHMGYRQAEFQILKAELERTKEEQELKEKLKETETH  
-----

|          |       |              |       |                |        |          |                           |                       |
|----------|-------|--------------|-------|----------------|--------|----------|---------------------------|-----------------------|
| 01:9606  | 11644 | NM_024657    | MORC4 | Homo_sapiens   | FKKVQH | ELVIYSTQ | EAGLYWSKKHMGYRQAEFQILKAE  | LERTKEEKQELKEKLKETETH |
| 03:9544  | 11644 | NM_001266454 | MORC4 | Macaca_mulatta | FKKVQH | ELVIYSTQ | EAGLYWSKKHMGYRQAEFQILKAE  | LERTKEEKEELKEKLKEAETH |
| 04:9913  | 11644 | NM_001102230 | MORC4 | Bos_taurus     | FKKVQH | ELVTYSTQ | ETEGLYWSKKHMGYRQAEFQILKAE | LERTKEEKQELKEKLKETETH |
| 07:10090 | 11644 | NM_001193309 | Morc4 | Mus_musculus   | YKKAQH | ELVTYSTQ | ETEGIYWSKKHMGYRQAEFQILKAE | LERTKEEKQELKEKLKETESH |
| 07:10090 | 11644 | NM_029413    | Morc4 | Mus_musculus   | YKKAQH | ELVTYSTQ | ETEGIYWSKKHMGYRQAEFQILKAE | LERTKEEKQELKEKLKETESH |

|          |             |                |       |                |          |                    |                   |           |
|----------|-------------|----------------|-------|----------------|----------|--------------------|-------------------|-----------|
| 00:1     | Ac-AAKMLLYR |                |       |                |          |                    |                   |           |
| 01:9606  | 11644       | 0#NP_001078823 | MORC4 | Homo_sapiens   | LEMLQKAQ | QGFGKA- YAATYPRQLS | -----PYFCPPS----- | LGAS----- |
| 01:9606  | 11644       | 0#NP_078933    | MORC4 | Homo_sapiens   | LEMLQKAQ | QVSyrTPeGDDL       | ERALAKLTRLRIHVS   | YLLTSVLP  |
| 01:9606  | 11644       | NM_001085354   | MORC4 | Homo_sapiens   | LEMLQKAQ | QGFGKA- YAATYPRQLS | -----PYFCPPS----- | LGAS----- |
| 01:9606  | 11644       | NM_024657      | MORC4 | Homo_sapiens   | LEMLQKAQ | QVSyrTPeGDDL       | ERALAKLTRLRIHVS   | YLLTSVLP  |
| 03:9544  | 11644       | NM_001266454   | MORC4 | Macaca_mulatta | LEMLQKAQ | QGFGKA- YAATYPRQLS | -----PYFCPPS----- | LGAS----- |
| 04:9913  | 11644       | NM_001102230   | MORC4 | Bos_taurus     | LEMLQKAQ | QVSyrTPeGDDL       | ERALAKLTRLRIHVS   | YLLTSVLP  |
| 07:10090 | 11644       | NM_001193309   | Morc4 | Mus_musculus   | LEVLQKAQ | QVSFRNPeGDDL       | ERALARLTRLRVHVS   | YLLTSVLP  |
| 07:10090 | 11644       | NM_029413      | Morc4 | Mus_musculus   | LEVLQKAQ | QVSFRNPeGDDL       | ERLITRV           |           |

|          |             |                |       |                |             |  |  |  |
|----------|-------------|----------------|-------|----------------|-------------|--|--|--|
| 00:1     | Ac-AAKMLLYR |                |       |                |             |  |  |  |
| 01:9606  | 11644       | 0#NP_001078823 | MORC4 | Homo_sapiens   | YTVLEANHILD |  |  |  |
| 01:9606  | 11644       | 0#NP_078933    | MORC4 | Homo_sapiens   | YTVLEANHILD |  |  |  |
| 01:9606  | 11644       | NM_001085354   | MORC4 | Homo_sapiens   | YTVLEANHILD |  |  |  |
| 01:9606  | 11644       | NM_024657      | MORC4 | Homo_sapiens   | YTVLEANHILD |  |  |  |
| 03:9544  | 11644       | NM_001266454   | MORC4 | Macaca_mulatta | YTVLEANHILD |  |  |  |
| 04:9913  | 11644       | NM_001102230   | MORC4 | Bos_taurus     | YTVLEANHILD |  |  |  |
| 07:10090 | 11644       | NM_001193309   | Morc4 | Mus_musculus   | YTVLEANHILD |  |  |  |
| 07:10090 | 11644       | NM_029413      | Morc4 | Mus_musculus   | YTVLEANHILD |  |  |  |

*HSPB1*

Ac-MEEHKSAAEPSAPHFSEQTSR

CLUSTAL O(1.2.1) multiple sequence alignment

|                                                        |                                                                 |
|--------------------------------------------------------|-----------------------------------------------------------------|
| 00:1 Ac-MEEHKSAAEPSAPHFSEQTSR                          | -----MEEHKSAAEPSAPHFSEQTS-----R-----                            |
| 01:9606 1180 0#NP_001531 HSPB1 Homo_sapiens            | -----MTERRVPFSLLRGSPS                                           |
| 01:9606 1180 NM_001540 HSPB1 Homo_sapiens              | RPQTTPPAKNTRLEEHKSAAEPSAPHFSEQTS-----RAESASMTERRVPFSLLRGSPS     |
| 03:9544 1180 NM_001260949 HSPB1 Macaca_mulatta         | RPQTTPPAKNTRLEPHKSAAGPSAPHFSEQTS-----RAESASMTERRVPFSLLRGSPS     |
| 04:9913 1180 NM_001025569 HSPB1 Bos_taurus             | -PETTPPAKNTRLETHKSAAGSGARHFSRFSEPPP---DAPRPASMAERRVPFSLLRGSPS   |
| 05:9615 1180 NM_001003295 HSPB1 Canis_lupus_familiaris | -----RPRRPASRASMTERRVPFSLLRSPS                                  |
| 06:10116 1180 NM_031970 Hspbl Rattus_norvegicus        | -----HFSDPQPSASRSSALTSSAKTMTERRVPFSLLRSPS                       |
| 06:10116 1180 NM_031970 Hspbl Rattus_norvegicus        | -PEAPPAKNTRLDTHKSTVGAPARHFSDPQPSASRSSALTSSAKTMTERRVPFSLLRSPS    |
| 07:10090 1180 NM_013560 Hspbl Mus_musculus             | -----PAKNMTERRVPFSLLRSPS                                        |
| 08:9031 1180 NM_205290 HSPB1 Gallus_gallus             | -----GRTMAERRVPFTFLTSPS                                         |
| 09:8364 1180 NM_001079349 hspbl Xenopus_tropicalis     | -----AEQSKEHLLAGTGLEKMSERRIPFSFLRTPS                            |
| 10:7955 1180 NM_001008615 hspbl Danio_rerio            | -----IRTHHTLTN-----RAEQQLFKTSAMAERRIPFSFMRSPS                   |
| 00:1 Ac-MEEHKSAAEPSAPHFSEQTSR                          | -----                                                           |
| 01:9606 1180 0#NP_001531 HSPB1 Homo_sapiens            | WDPFDRDWYP-HSRLFDQAFGLPRLPEEWSQWLGGSSWPGYVRPLPPAAIESPA-----     |
| 01:9606 1180 NM_001540 HSPB1 Homo_sapiens              | WDPFDRDWYP-HSRLFDQAFGLPRLPEEWSQWLGGSSWPGYVRPLPPAAIESPA-----     |
| 03:9544 1180 NM_001260949 HSPB1 Macaca_mulatta         | WDPFDRDWYP-HSRLFDQAFGLPRLPEEWSQWLGGSSWPGYVRPLPPAAIESPA-----     |
| 04:9913 1180 NM_001025569 HSPB1 Bos_taurus             | WDPFDRDWYPAHSRLFDQAFGLPRLPEEWSQWLSHSGWPGYVRALPAAIE-----         |
| 05:9615 1180 NM_001003295 HSPB1 Canis_lupus_familiaris | WDPFDRDWYPAHSRLFDQAFGLPRLPEEWAQWFGHSGWPGYVRPIPPAVEGPAA-----AA   |
| 06:10116 1180 NM_031970 Hspbl Rattus_norvegicus        | WEPFRDWYPAHSRLFDQAFGVPRFPDEWSQWFSAGWPGYVRPLPAATAEGPA-----AV     |
| 06:10116 1180 NM_031970 Hspbl Rattus_norvegicus        | WEPFRDWYPAHSRLFDQAFGVPRFPDEWSQWFSAGWPGYVRPLPAATAEGPA-----AV     |
| 07:10090 1180 NM_013560 Hspbl Mus_musculus             | WEPFRDWYPAHSRLFDQAFGVPRPLPDEWSQWFSAGWPGYVRPLPAATAEGPA-----AV    |
| 08:9031 1180 NM_205290 HSPB1 Gallus_gallus             | WEPFRDWYHG-SRLFDQSFGMPIPEDWYKWPSSGSAWPGYFRLLPSESALLPA--PGSPY    |
| 09:8364 1180 NM_001079349 hspbl Xenopus_tropicalis     | WDPFDRDWYQGTSLRLFDQSFGMPIPEDWYQWPST-SWPGYVRMLPSSQSMVEVVP--PTTPA |
| 10:7955 1180 NM_001008615 hspbl Danio_rerio            | WDPFDRDWYQG-SRLFDQSFGMPALSEMLTFPST-HWPGYMRPFGHPEFASLMQGPVPMP    |
| 00:1 Ac-MEEHKSAAEPSAPHFSEQTSR                          | -----                                                           |
| 01:9606 1180 0#NP_001531 HSPB1 Homo_sapiens            | -VAAPAYSRLSRQLSSGVSEIRHTADRWRVSLDVNHFAPEDELTVKTKDGVVEITGKHEE    |
| 01:9606 1180 NM_001540 HSPB1 Homo_sapiens              | -VAAPAYSRLSRQLSSGVSEIRHTADRWRVSLDVNHFAPEDELTVKTKDGVVEITGKHEE    |
| 03:9544 1180 NM_001260949 HSPB1 Macaca_mulatta         | -VAAPAYSRLSRQLSSGVSEIRHTADRWRVSLDVNHFAPEDELTVKTKDGVVEITGKHEE    |
| 04:9913 1180 NM_001025569 HSPB1 Bos_taurus             | ---GPAYNRALSRLSSGVSEIQQTADRWRVSLDVNHFAPEELTVKTKDGVVEITGKHEE     |
| 05:9615 1180 NM_001003295 HSPB1 Canis_lupus_familiaris | AAAAPAYSRLSRQLSSGVSEIRQTADRWRVSLDVNHFAPEELTVKTKDGVVEITGKHEE     |
| 06:10116 1180 NM_031970 Hspbl Rattus_norvegicus        | TLARP-FSRALNRQLSSGVSEIRQTADRWRVSLDVNHFAPEELTVKTKEGVVEITGKHEE    |
| 06:10116 1180 NM_031970 Hspbl Rattus_norvegicus        | TLAAPAFSRALNRQLSSGVSEIRQTADRWRVSLDVNHFAPEELTVKTKEGVVEITGKHEE    |
| 07:10090 1180 NM_013560 Hspbl Mus_musculus             | TLAAPAFSRALNRQLSSGVSEIRQTADRWRVSLDVNHFAPEELTVKTKEGVVEITGKHEE    |
| 08:9031 1180 NM_205290 HSPB1 Gallus_gallus             | GRAL-----SELSSGISEIRQSADSWKVTLDVNHFAPEELVVKTKDNIVEITGKHEE       |
| 09:8364 1180 NM_001079349 hspbl Xenopus_tropicalis     | GATAPDFNRALSRLSSGISEIRQTSQWKISLDVNHFAPEELVIKTKDIVEITGKHEE       |
| 10:7955 1180 NM_001008615 hspbl Danio_rerio            | PMTPPSYGRALSRLSSGMSEVKQTDGDSWKISLDVNHFSPEELNVKTKDGVLEITGKHEE    |
| 00:1 Ac-MEEHKSAAEPSAPHFSEQTSR                          | -----                                                           |
| 01:9606 1180 0#NP_001531 HSPB1 Homo_sapiens            | RQDEHGYISRCFTRKYTLPPGVDPTQVSSSLSPEGTLTVEAPMPKLATQSNIEITIPVTFE   |
| 01:9606 1180 NM_001540 HSPB1 Homo_sapiens              | RQDEHGYISRCFTRKYTLPPGVDPTQVSSSLSPEGTLTVEAPMPKLATQSNIEITIPVTFE   |
| 03:9544 1180 NM_001260949 HSPB1 Macaca_mulatta         | RQDEHGYISRCFTRKYTLPPGVDPTQVSSSLSPEGTLTVEAPMPKLATQSNIEITIPVTFE   |
| 04:9913 1180 NM_001025569 HSPB1 Bos_taurus             | RQDEHGYISRCFTRKYTLPPGVDPTLVSSSLSPEGTLTVEAPLPKSAITQSAEITIPVTFQ   |
| 05:9615 1180 NM_001003295 HSPB1 Canis_lupus_familiaris | RQDEHGYISRRLLPKYTLPPGVDPTLVSSSLSPEGTLTVEAPMPKPAITQSAEITIPVTFE   |
| 06:10116 1180 NM_031970 Hspbl Rattus_norvegicus        | RQDEHGYISRCFTRKYTLPPGVDPTLVSSSLSPEGTLTVEAPLPKAVTQSAEITIPVTFE    |
| 06:10116 1180 NM_031970 Hspbl Rattus_norvegicus        | RQDEHGYISRCFTRKYTLPPGVDPTLVSSSLSPEGTLTVEAPLPKAVTQSAEITIPVTFE    |
| 07:10090 1180 NM_013560 Hspbl Mus_musculus             | RQDEHGYISRCFTRKYTLPPGVDPTLVSSSLSPEGTLTVEAPLPKAVTQSAEITIPVTFE    |
| 08:9031 1180 NM_205290 HSPB1 Gallus_gallus             | KQDEHGFISRCFTRKYTLPPGVEATAVRSSLSPDGMLTVEAPLPKPAIQSSEITIPVTFE    |
| 09:8364 1180 NM_001079349 hspbl Xenopus_tropicalis     | KQDEHGFISRCFTRKYTLPPGVDINKVASSLSPDGILTVEAPLPKPAIQSAEIAIPITFQ    |
| 10:7955 1180 NM_001008615 hspbl Danio_rerio            | RKDBHGFISRCFTRKYTLPPGVDSEKISSCLSPEGVLTVEAPLPKPAIQAPEVNIIPVNTK   |
| 00:1 Ac-MEEHKSAAEPSAPHFSEQTSR                          | -----                                                           |
| 01:9606 1180 0#NP_001531 HSPB1 Homo_sapiens            | SRAQLGGPEAAKSDETAAK---                                          |
| 01:9606 1180 NM_001540 HSPB1 Homo_sapiens              | SRAQLGGPEAAKSDETAAK---                                          |
| 03:9544 1180 NM_001260949 HSPB1 Macaca_mulatta         | SRAQLGGPEAAKSDETAAK---                                          |
| 04:9913 1180 NM_001025569 HSPB1 Bos_taurus             | ARAQLGGPEAGKSEQPETS KDP                                         |
| 05:9615 1180 NM_001003295 HSPB1 Canis_lupus_familiaris | ARAQIGGPEAGKSEQSGAK---                                          |
| 06:10116 1180 NM_031970 Hspbl Rattus_norvegicus        | ARAQIGGPESEQSG---AK---                                          |
| 06:10116 1180 NM_031970 Hspbl Rattus_norvegicus        | ARAQIGGPESEQSG---AK---                                          |
| 07:10090 1180 NM_013560 Hspbl Mus_musculus             | ARAQIGGPEAGKSEQSGAK---                                          |
| 08:9031 1180 NM_205290 HSPB1 Gallus_gallus             | AKKEEPAKK-----                                                  |
| 09:8364 1180 NM_001079349 hspbl Xenopus_tropicalis     | SRAEIGTTEAKKGEEATKK---                                          |
| 10:7955 1180 NM_001008615 hspbl Danio_rerio            | TVSTTK-----                                                     |

*SYAP1*

Ac-MESKATSAR

CLUSTAL O(1.2.1) multiple sequence alignment

|                   |       |              |                               |  |                                                               |
|-------------------|-------|--------------|-------------------------------|--|---------------------------------------------------------------|
| 00:1 Ac-MESKATSAR |       |              |                               |  | -----                                                         |
| 01:9606           | 12078 | 0#NP_116185  | SYAP1 Homo_sapiens            |  | -----                                                         |
| 01:9606           | 12078 | NM_032796    | SYAP1 Homo_sapiens            |  | -----IEAGLRRLRCSSDFRTSPW                                      |
| 04:9913           | 12078 | NM_001034348 | SYAP1 Bos_taurus              |  | -----                                                         |
| 06:10116          | 12078 | NM_001004253 | Syap1 Rattus_norvegicus       |  | -----                                                         |
| 07:10090          | 12078 | NM_025932    | Syap1 Mus_musculus            |  | -----AAVRE--GGPSFGRSPV                                        |
| 08:9031           | 12078 | NM_001277737 | SYAP1 Gallus_gallus           |  | -----                                                         |
| 09:8364           | 12078 | NM_203973    | syap1 Xenopus_tropicalis      |  | -----                                                         |
| 10:7955           | 12078 | NM_200942    | syap1 Danio_rerio             |  | -----                                                         |
| 12:7227           | 12078 | NM_001275688 | Sap47 Drosophila_melanogaster |  | EPREQESLESVERAHVFLVRTHHQSRLRETAGANMFSGLTNQFTSLVGAVKGGAGDEDVPA |
| 12:7227           | 12078 | NM_001300421 | Sap47 Drosophila_melanogaster |  | EPREQESLESVERAHVFLVRTHHQSRLRETAGANMFSGLTNQFTSLVGAVKGGAGDEDVPA |
| 12:7227           | 12078 | NM_079647    | Sap47 Drosophila_melanogaster |  | EPREQESLESVERAHVFLVRTHHQSRLRETAGANMFSGLTNQFTSLVGAVKGGAGDEDVPA |
| 12:7227           | 12078 | NM_169684    | Sap47 Drosophila_melanogaster |  | EPREQESLESVERAHVFLVRTHHQSRLRETAGANMFSGLTNQFTSLVGAVKGGAGDEDVPA |
| 12:7227           | 12078 | NM_169685    | Sap47 Drosophila_melanogaster |  | EPREQESLESVERAHVFLVRTHHQSRLRETAGANMFSGLTNQFTSLVGAVKGGAGDEDVPA |
| 12:7227           | 12078 | NM_169686    | Sap47 Drosophila_melanogaster |  | EPREQESLESVERAHVFLVRTHHQSRLRETAGANMFSGLTNQFTSLVGAVKGGAGDEDVPA |
| 12:7227           | 12078 | NM_169687    | Sap47 Drosophila_melanogaster |  | EPREQESLESVERAHVFLVRTHHQSRLRETAGANMFSGLTNQFTSLVGAVKGGAGDEDVPA |
| 12:7227           | 12078 | NM_169688    | Sap47 Drosophila_melanogaster |  | EPREQESLESVERAHVFLVRTHHQSRLRETAGANMFSGLTNQFTSLVGAVKGGAGDEDVPA |
| 12:7227           | 12078 | NM_169689    | Sap47 Drosophila_melanogaster |  | EPREQESLESVERAHVFLVRTHHQSRLRETAGANMFSGLTNQFTSLVGAVKGGAGDEDVPA |
| 12:7227           | 12078 | NM_169690    | Sap47 Drosophila_melanogaster |  | EPREQESLESVERAHVFLVRTHHQSRLRETAGANMFSGLTNQFTSLVGAVKGGAGDEDVPA |
| 00:1 Ac-MESKATSAR |       |              |                               |  | -----MESKATSAR-----                                           |
| 01:9606           | 12078 | 0#NP_116185  | SYAP1 Homo_sapiens            |  | -----                                                         |
| 01:9606           | 12078 | NM_032796    | SYAP1 Homo_sapiens            |  | ES-----RRVESKATSARCGLWGS-----GPRR-----                        |
| 04:9913           | 12078 | NM_001034348 | SYAP1 Bos_taurus              |  | -----AAPSR-VSRDP-----DRGG-----                                |
| 06:10116          | 12078 | NM_001004253 | Syap1 Rattus_norvegicus       |  | -----GDRGGS-----                                              |
| 07:10090          | 12078 | NM_025932    | Syap1 Mus_musculus            |  | PV-----S-----LPRRPAESDQPVVKGARALGRDGRGGG-----                 |
| 08:9031           | 12078 | NM_001277737 | SYAP1 Gallus_gallus           |  | -----RSGSPCGEWSPSVVA---PVDRCLR-GRGR-----                      |
| 09:8364           | 12078 | NM_203973    | syap1 Xenopus_tropicalis      |  | -----IVLWE-----                                               |
| 10:7955           | 12078 | NM_200942    | syap1 Danio_rerio             |  | -----SILRSEIYQR-----SINPEQSDTR-----                           |
| 12:7227           | 12078 | NM_001275688 | Sap47 Drosophila_melanogaster |  | PTGDAPAAAPAAASTSVEATASSA--VDPEAAAAAG---GEGLEGEAEAGK-----      |
| 12:7227           | 12078 | NM_001300421 | Sap47 Drosophila_melanogaster |  | PTGDAPAAAPAAASTSVEATASSA--VDPEAAAAAG---GEGLEGEAEAGK-----      |
| 12:7227           | 12078 | NM_079647    | Sap47 Drosophila_melanogaster |  | PTGDAPAAAPAAASTSVEATASSA--VDPEAAAAAG---GEGLEGEAEAGK-----      |
| 12:7227           | 12078 | NM_169684    | Sap47 Drosophila_melanogaster |  | PTGDAPAAAPAAASTSVEATASSA--VDPEAAAAAG---GEGLEGEAEAGKRLPKSASLVD |
| 12:7227           | 12078 | NM_169685    | Sap47 Drosophila_melanogaster |  | PTGDAPAAAPAAASTSVEATASSA--VDPEAAAAAG---GEGLEGEAEAGKRLPKSASLVD |
| 12:7227           | 12078 | NM_169686    | Sap47 Drosophila_melanogaster |  | PTGDAPAAAPAAASTSVEATASSA--VDPEAAAAAG---GEGLEGEAEAGKRLPKSASLVD |
| 12:7227           | 12078 | NM_169687    | Sap47 Drosophila_melanogaster |  | PTGDAPAAAPAAASTSVEATASSA--VDPEAAAAAG---GEGLEGEAEAGKRLPKSASLVD |
| 12:7227           | 12078 | NM_169688    | Sap47 Drosophila_melanogaster |  | PTGDAPAAAPAAASTSVEATASSA--VDPEAAAAAG---GEGLEGEAEAGK-----      |
| 12:7227           | 12078 | NM_169689    | Sap47 Drosophila_melanogaster |  | PTGDAPAAAPAAASTSVEATASSA--VDPEAAAAAG---GEGLEGEAEAGK-----      |
| 12:7227           | 12078 | NM_169690    | Sap47 Drosophila_melanogaster |  | PTGDAPAAAPAAASTSVEATASSA--VDPEAAAAAG---GEGLEGEAEAGKRLPKSASLVD |
| 00:1 Ac-MESKATSAR |       |              |                               |  | -----                                                         |
| 01:9606           | 12078 | 0#NP_116185  | SYAP1 Homo_sapiens            |  | -----MFRGLSSWLGLQQPVAGG-----                                  |
| 01:9606           | 12078 | NM_032796    | SYAP1 Homo_sapiens            |  | ---RPASGMFRGLSSWLGLQQPVAGG-----                               |
| 04:9913           | 12078 | NM_001034348 | SYAP1 Bos_taurus              |  | ---GPADGMFRSLSSWFLGEPQAGG-----                                |
| 06:10116          | 12078 | NM_001004253 | Syap1 Rattus_norvegicus       |  | ---DPAGGMFRGLSSWLGLKQPEGAA-----                               |
| 07:10090          | 12078 | NM_025932    | Syap1 Mus_musculus            |  | ---DPAGGMFGLSSWLGLKPPEGAA-----                                |
| 08:9031           | 12078 | NM_001277737 | SYAP1 Gallus_gallus           |  | ---PRRRAMRLGLGSWLGLERTGEEK-----                               |
| 09:8364           | 12078 | NM_203973    | syap1 Xenopus_tropicalis      |  | ---SCNPAMFRGLGSWLGLDPEQETQ-----                               |
| 10:7955           | 12078 | NM_200942    | syap1 Danio_rerio             |  | ---TRAGSMFKSWSSWLSGDAENEEE-----                               |
| 12:7227           | 12078 | NM_001275688 | Sap47 Drosophila_melanogaster |  | -----SGWLGSAKGWLGNASIPSMAMPSPMSPAMPAMPSPISIPGLRKAGADGAEG      |
| 12:7227           | 12078 | NM_001300421 | Sap47 Drosophila_melanogaster |  | -----SGWLGSAKGWLGNASIPSMAMPSPMSPAMPAMPSPISIPGLRKAGADGAEG      |
| 12:7227           | 12078 | NM_079647    | Sap47 Drosophila_melanogaster |  | -----SGWLGSAKGWLGNASIPSMAMPSPMSPAMPAMPSPISIPGLRKAGADGAEG      |
| 12:7227           | 12078 | NM_169684    | Sap47 Drosophila_melanogaster |  | SLVSEATGWLGSAKGWLGNASIPSMAMPSPMSPAMPAMPSPISIPGLRKAGADGAEG     |
| 12:7227           | 12078 | NM_169685    | Sap47 Drosophila_melanogaster |  | SLVSEATGWLGSAKGWLGNASIPSMAMPSPMSPAMPAMPSPISIPGLRKAGADGAEG     |
| 12:7227           | 12078 | NM_169686    | Sap47 Drosophila_melanogaster |  | SLVSEATGWLGSAKGWLGNASIPSMAMPSPMSPAMPAMPSPISIPGLRKAGADGAEG     |
| 12:7227           | 12078 | NM_169687    | Sap47 Drosophila_melanogaster |  | SLVSEATGWLGSAKGWLGNASIPSMAMPSPMSPAMPAMPSPISIPGLRKAGADGAEG     |
| 12:7227           | 12078 | NM_169688    | Sap47 Drosophila_melanogaster |  | -----SGWLGSAKGWLGNASIPSMAMPSPMSPAMPAMPSPISIPGLRKAGADGAEG      |
| 12:7227           | 12078 | NM_169689    | Sap47 Drosophila_melanogaster |  | -----SGWLGSAKGWLGNASIPSMAMPSPMSPAMPAMPSPISIPGLRKAGADGAEG      |
| 12:7227           | 12078 | NM_169690    | Sap47 Drosophila_melanogaster |  | SLVSEATGWLGSAKGWLGNASIPSMAMPSPMSPAMPAMPSPISIPGLRKAGADGAEG     |
| 00:1 Ac-MESKATSAR |       |              |                               |  | -----                                                         |
| 01:9606           | 12078 | 0#NP_116185  | SYAP1 Homo_sapiens            |  | -----GQPNGDA-----P--PEQPSETVAESAE--EELQ                       |
| 01:9606           | 12078 | NM_032796    | SYAP1 Homo_sapiens            |  | -----GQPNGDA-----P--PEQPSETVAESAE--EELQ                       |
| 04:9913           | 12078 | NM_001034348 | SYAP1 Bos_taurus              |  | -----R-QS-----QGQGQPRGHA-----P--PDQRSEAVAESVE--GEPQ           |
| 06:10116          | 12078 | NM_001004253 | Syap1 Rattus_norvegicus       |  | -----A-G-EPPP--SGDKLSSGAA-----P--PEKSSEGLVEPTTEEEQ--          |
| 07:10090          | 12078 | NM_025932    | Syap1 Mus_musculus            |  | -----A-EGEEPPSRDGDKLSAGAA-----P--SEESPERVEPTTEEQQQP           |
| 08:9031           | 12078 | NM_001277737 | SYAP1 Gallus_gallus           |  | -----L-LV-----AEEGSSPAEE-----A--EEPGAEPGEQSQE--RAEP           |
| 09:8364           | 12078 | NM_203973    | syap1 Xenopus_tropicalis      |  | -----K-TAEKETGRNEEE-TRSAE-----P--GDGEKLKSAGEDGQSQQA           |
| 10:7955           | 12078 | NM_200942    | syap1 Danio_rerio             |  | -----E-KKK-----SDSAE-----T--EE-----EKKKS                      |
| 12:7227           | 12078 | NM_001275688 | Sap47 Drosophila_melanogaster |  | AEGAVAGEGGAASGAVSGGEDDDKS---SATEGADSHPASGGGTPTGDEGQIGQ----    |
| 12:7227           | 12078 | NM_001300421 | Sap47 Drosophila_melanogaster |  | AEGAVAGEGGAASGAVSGGEDDDKSRYISATEGADSHPASGGGTPTGDEGQIGQ----    |
| 12:7227           | 12078 | NM_079647    | Sap47 Drosophila_melanogaster |  | AEGAVAGEGGAASGAVSGGEDDDKSRYISATEGADSHPASGGGTPTGDEGQIGQ----    |
| 12:7227           | 12078 | NM_169684    | Sap47 Drosophila_melanogaster |  | AEGAVAGEGGAASGAVSGGEDDDKSRYISATEGADSHPASGGGTPTGDEGQIGQGKDE    |
| 12:7227           | 12078 | NM_169685    | Sap47 Drosophila_melanogaster |  | AEGAVAGEGGAASGAVSGGEDDDKSRYISATEGADSHPASGGGTPTGDEGQIGQGKDE    |
| 12:7227           | 12078 | NM_169686    | Sap47 Drosophila_melanogaster |  | AEGAVAGEGGAASGAVSGGEDDDKSRYISATEGADSHPASGGGTPTGDEGQIGQGKDE    |
| 12:7227           | 12078 | NM_169687    | Sap47 Drosophila_melanogaster |  | AEGAVAGEGGAASGAVSGGEDDDKSRYISATEGADSHPASGGGTPTGDEGQIGQGKDE    |
| 12:7227           | 12078 | NM_169688    | Sap47 Drosophila_melanogaster |  | AEGAVAGEGGAASGAVSGGEDDDKSRYISATEGADSHPASGGGTPTGDEGQIGQ----    |
| 12:7227           | 12078 | NM_169689    | Sap47 Drosophila_melanogaster |  | AEGAVAGEGGAASGAVSGGEDDDKSRYISATEGADSHPASGGGTPTGDEGQIGQGKDE    |
| 12:7227           | 12078 | NM_169690    | Sap47 Drosophila_melanogaster |  | AEGAVAGEGGAASGAVSGGEDDDKSRYISATEGADSHPASGGGTPTGDEGQIGQGKDE    |

QAGDQELLHQAKDFGNLYLNFNFASAATKKITESVAETAQTIKKSVEEGKIDGIIDKTIIGD  
QAGDQELLHQAKDFGNLYLNFNFASAATKKITESVAETAQTIKKSVEEGKIDGIIDKTIIGD  
LAGNQELLHQAKGLGNLYLNFNFATAATKKITESVAETAQTIKKSVEEGKIDDIIDKTFIIGD  
LTEDPQFLHQAKGLGNLYLNFNFASAATKKITESVTETAQTIKKSVEEGKIDDIIDKTIIGD  
PTEDPQFLHQAKGLGNLYLNFNFASAATKKITESVTETAQTIKKSVEEGKIDDIIDKTIIGD  
QEDTDALLSQAAGFGSYLNFNFATAATKKISESVAETAQTIKKSVEEGKIDSIDKTIIGD  
NESEALINQAAGFGSYLNFNFASVATKKISESVAETAQNIKKSVEEGKIDGLIKTIIGD  
INTPSEDPPAAGLSGFIILNASATKKISESVAETAQSIKKTVEESNIDGIIDKTIIGD  
--VTTKVTQQAHHFGSFLSSAISKAGSKIKET-----VKDNTILDS  
--VTTKVTQQAHHFGSFLSSAISKAGSKIKET-----VKDNTILDS  
--VTTKVTQQAHHFGSFLSSAISKAGSKIKET-----VKDNTILDS  
VKITTKVTQQAHHFGSFLSSAISKAGSKIKET-----VKDNTILDS  
VKITTKVTQQAHHFGSFLSSAISKAGSKIKET-----VKDNTILDS  
VKITTKVTQQAHHFGSFLSSAISKAGSKIKET-----VKDNTILDS  
VKITTKVTQQAHHFGSFLSSAISKAGSKIKET-----VKDNTILDS  
--VTTKVTQQAHHFGSFLSSAISKAGSKIKET-----VKDNTILDS  
VKITTKVTQQAHHFGSFLSSAISKAGSKIKET-----VKDNTILDS  
VKITTKVTQQAHHFGSFLSSAISKAGSKIKET-----VKDNTILDS

[illegible][illegible]

```

-----
AAG--KEEKSSNGREQ-DLPLAE-----AVRPKTPPVVIKSQLK-----
AAG--KEEKSSNGREQ-DLPLAE-----AVRPKTPPVVIKSQLK-----
AAG--KEEKNHGRQN-ELPLTE-----AVRPKTPPVVIKSQLK-----
ASG--KEEKSSSRDD-NLPLTE-----AVRPKTPPVVIKSQLK-----
ASG--KEEKSSNRDD-NLPLTE-----AVRPKTPPVVIKSQLK-----
AVG--KEE-NKGREE-DNQLTE-----TIRPKTPPVTIKPKQIK-----
ATG--KADKINSMQD-GGDLEE-----TVRPKTPPVTIKSPLK-----
AAE--KRDEE--KS-DQSISE-----SIRPKTPPVVISISKTK-----
-----
GQASSGEDED-----
GQASSGEDED-----
GQASSGEDALAFNY-----
GQASSGEDANEVATKEKKSKTAEPAKGDSVKAIAEQPKAVIEPEAEQECDVQAAKSKA
GQASSGEDANEVATKEKKSKTAEPAKGDSVKAIAEQPKAVIEPEAEQECDVQAAKSKA
GQASSGEDANEVATKEKKSKTAEPAKGDSVKAIAEQPKAVIEPEAEQECDVQAAKSKA
GQASSGEDANEVATKEKKSKTAEPAKGDSVKAIAEQPKAVIEPEAEQECDVQAAKSKA
GQASSGEDED-----
GQASSGEDANEVATKEKKSKTAEPAKGDSVKAIAEQPKAVIEPEAEQECDVQAAKSKA
GQASSGEDALAFNY-----

```

-----

01:9606|12078|0#NP\_116185|SYAP1|Homo\_sapiens  
01:9606|12078|NM\_032796|SYAP1|Homo\_sapiens  
04:9913|12078|NM\_001034348|SYAP1|Bos\_taurus  
06:10116|12078|NM\_001004253|Syap1|Rattus\_norvegicus  
07:10090|12078|NM\_025932|Syap1|Mus\_musculus  
08:9031|12078|NM\_001277737|SYAP1|Gallus\_gallus  
09:8364|12078|NM\_203973|syap1|Xenopus\_tropicalis  
10:7955|12078|NM\_200942|syap1|Danio\_rerio  
12:7227|12078|NM\_001275688|Sap47|Drosophila\_melanogaster  
12:7227|12078|NM\_001300421|Sap47|Drosophila\_melanogaster  
12:7227|12078|NM\_079647|Sap47|Drosophila\_melanogaster  
12:7227|12078|NM\_169684|Sap47|Drosophila\_melanogaster  
12:7227|12078|NM\_169685|Sap47|Drosophila\_melanogaster  
12:7227|12078|NM\_169686|Sap47|Drosophila\_melanogaster  
12:7227|12078|NM\_169687|Sap47|Drosophila\_melanogaster  
12:7227|12078|NM\_169688|Sap47|Drosophila\_melanogaster  
12:7227|12078|NM\_169689|Sap47|Drosophila\_melanogaster  
12:7227|12078|NM\_169690|Sap47|Drosophila\_melanogaster

00:1|Ac-MESKATSAR  
01:9606|12078|0#NP\_116185|SYAP1|Homo\_sapiens  
01:9606|12078|NM\_032796|SYAP1|Homo\_sapiens  
04:9913|12078|NM\_001034348|SYAP1|Bos\_taurus  
06:10116|12078|NM\_001004253|Syap1|Rattus\_norvegicus  
07:10090|12078|NM\_025932|Syap1|Mus\_musculus  
08:9031|12078|NM\_001277737|SYAP1|Gallus\_gallus  
09:8364|12078|NM\_203973|syap1|Xenopus\_tropicalis  
10:7955|12078|NM\_200942|syap1|Danio\_rerio  
12:7227|12078|NM\_001275688|Sap47|Drosophila\_melanogaster  
12:7227|12078|NM\_001300421|Sap47|Drosophila\_melanogaster  
12:7227|12078|NM\_079647|Sap47|Drosophila\_melanogaster  
12:7227|12078|NM\_169684|Sap47|Drosophila\_melanogaster  
12:7227|12078|NM\_169685|Sap47|Drosophila\_melanogaster  
12:7227|12078|NM\_169686|Sap47|Drosophila\_melanogaster  
12:7227|12078|NM\_169687|Sap47|Drosophila\_melanogaster  
12:7227|12078|NM\_169688|Sap47|Drosophila\_melanogaster  
12:7227|12078|NM\_169689|Sap47|Drosophila\_melanogaster  
12:7227|12078|NM\_169690|Sap47|Drosophila\_melanogaster

00:1|Ac-MESKATSAR  
01:9606|12078|0#NP\_116185|SYAP1|Homo\_sapiens  
01:9606|12078|NM\_032796|SYAP1|Homo\_sapiens  
04:9913|12078|NM\_001034348|SYAP1|Bos\_taurus  
06:10116|12078|NM\_001004253|Syap1|Rattus\_norvegicus  
07:10090|12078|NM\_025932|Syap1|Mus\_musculus  
08:9031|12078|NM\_001277737|SYAP1|Gallus\_gallus  
09:8364|12078|NM\_203973|syap1|Xenopus\_tropicalis  
10:7955|12078|NM\_200942|syap1|Danio\_rerio  
12:7227|12078|NM\_001275688|Sap47|Drosophila\_melanogaster  
12:7227|12078|NM\_001300421|Sap47|Drosophila\_melanogaster  
12:7227|12078|NM\_079647|Sap47|Drosophila\_melanogaster  
12:7227|12078|NM\_169684|Sap47|Drosophila\_melanogaster  
12:7227|12078|NM\_169685|Sap47|Drosophila\_melanogaster  
12:7227|12078|NM\_169686|Sap47|Drosophila\_melanogaster  
12:7227|12078|NM\_169687|Sap47|Drosophila\_melanogaster  
12:7227|12078|NM\_169688|Sap47|Drosophila\_melanogaster  
12:7227|12078|NM\_169689|Sap47|Drosophila\_melanogaster  
12:7227|12078|NM\_169690|Sap47|Drosophila\_melanogaster

TQEDEEEISTSPGVSEFVSDAFDACNL-NQEDLRKEMEQLVLDKKQEETAVLEEDSADWE  
TQEDEEEISTSPGVSEFVSDAFDACNL-NQEDLRKEMEQLVLDKKQEETAVLEEDSADWE  
TQEDEEEISTSPCVSEFVSDAFDSCNL-DQEDLRKEMEQLVLDKKKEEGTVALEEDSVDWE  
NQEDEEEISTSPGVSEFVSDAFDACNL-NQEDLRKEMEQLVLDKKQEEATALEV CYRRFY  
SQEDEEEISTSPGVSEFVSDAFDTCNL-NQEDLRKEMEQLVLDKKQEEATALEEDSTDWE  
SQEDEEEISTSPGVSEFVSDAFDACNL-NQEDLRKEMEQLVLDKKREETS VVEEETADWE  
NPEEEEEISTSPGVSEFVSDAFDTCNL-NQEDLRKEMEQLILDKKDEAD-KPEEETEDWI  
TTEIEEDISTSPGVSEFVSDAFDTCDI-NQEDLRNEMKQLVLDKKDE-----ETADWE  
-----  
-----  
-----  
KAQAGKELGQKISESEFVSDDFQASSESDLAEIQDGMRKLGLDSMTQQA-LAATDEEQWE  
KAQAGKELGQKISESEFVSDDFQASSESDLAEIQDGMRKLGLDSMTQQA-LAATDEEQWE  
KAQAGKELGQKISESEFVSDDFQASSESDLAEIQDGMRKLGLDSMTQQA-LAATDEEQWE  
KAQAGKELGQKISESEFVSDDFQASSESDLAEIQDGMRKLGLDSMTQQA-LAATDEEQWE  
-----  
KAQAGKELGQKISESEFVSDDFQASSESDLAEIQDGMRKLGLDSMTQQA-LAATDEEQWE  
-----

-----  
KELQQELQYEVVTESEK-RDENWDKEIEKMLQEEN-----  
KELQQELQYEVVTESEK-RDENWDKEIEKMLQEEN-----  
KELQQELQYEVVAESEK-RDENWDKEIEEMLKEEN-----  
-----  
KELQQELQYEVVAESEK-RDENWDKEIEKMLQES-----  
KELQQELQYEVVTESEK-RDENWDKEIEEMLQEEN-----  
KELQDVVQYEVVTDSDKMKDENWDKEIEELLQED-----  
KELQQELQYEVVVDPEN-RDDNWDREIEEMLQDDS-----  
-----  
-----  
KDLEAELKDYEVVDEGGTGGDGGGRRKGRKAGEDDTEADEDEPTISNLRTRSTNNDWEE  
KDLEAELKDYEVVDEGGTGGDGGGRRKGRKAGEDDTEADEDEPTISNLRTRSTNNDWEE  
KDLEAELKDYEVVDEGGTGGDGGGRRKGRKAGEDDTEADEDEPTISNLRTRSTNNDWEE  
KDLEAELKDYEVVDEGGTGGDGGGRRKGRKAGEDDTEADEDEPTISNLRTRSTNNDWEE  
-----  
KDLEAELKDYEVVDEGGTGGDGGGRRKGRKAGEDDTEADEDEPTISNLRTRSTNNDWEE  
-----

-----  
-----  
-----  
-----  
-----  
-----  
-----  
-----  
-----  
-----  
YADLIEDTDDLK  
YADLIEDTDDLK  
YADLIEDTDDLK  
YADLIEDTDDLK  
-----  
YADLIEDTDDLK  
-----  
-----

***TXN***

Ac-MDPFPSVLTAAR

CLUSTAL O(1.2.1) multiple sequence alignment

|                                                             |                                                             |
|-------------------------------------------------------------|-------------------------------------------------------------|
| 00:1 Ac-MDPFPSVLTAAR                                        | -----MDPF-----                                              |
| 01:9606 128202 0#NP_001231867 TXN Homo_sapiens              | -----                                                       |
| 01:9606 128202 0#NP_003320 TXN Homo_sapiens                 | -----                                                       |
| 01:9606 128202 NM_001244938 TXN Homo_sapiens                | SQAPGAGRGRGAATGAEVRPGARAPATRTPGVPVYKGREQAA--SLEALFGALDPF--  |
| 01:9606 128202 NM_003329 TXN Homo_sapiens                   | SQAPGAGRGRGAATGAEVRPGARAPATRTPGVPVYKGREQAA--SLEALFGALDPF--  |
| 03:9544 128202 NM_001042732 TXN Macaca_mulatta              | -----PFIKGEQ--A--ATQARFGALDPF--                             |
| 04:9913 128202 NM_173968 TXN Bos_taurus                     | -----ENSVRPLGSV-----                                        |
| 06:10116 128202 NM_053800 Txn1 Rattus_norvegicus            | -----SSPSSIPSVTSIPMWCSLKWMWM-----                           |
| 07:10090 128202 NM_011660 Txn1 Mus_musculus                 | -----LRLRGRAR-----CGRAIAESAAACGTRVRGTRPL--                  |
| 08:9031 128202 NM_205453 TXN Gallus_gallus                  | -----                                                       |
| 09:8364 128202 NM_001130198 LOC100170420 Xenopus_tropicalis | -----                                                       |
| 10:7955 128202 NM_001002461 txn Danio_rerio                 | -----                                                       |
| 10:7955 128202 NM_200023 zgc:56493 Danio_rerio              | -----                                                       |
| 12:7227 128202 NM_078802 Trx-2 Drosophila_melanogaster      | -----LSNF-----                                              |
| 12:7227 128202 NM_164863 Trx-2 Drosophila_melanogaster      | -----LSNF-----                                              |
| 15:3702 128202 NM_123358 TRX2 Arabidopsis_thaliana          | TQS-----ER-----EARRETIMGALSTVFGSGEDA--                      |
| 00:1 Ac-MDPFPSVLTAAR                                        | --PSVLTAAR--                                                |
| 01:9606 128202 0#NP_001231867 TXN Homo_sapiens              | -----MVKQIESKTAF--QEALDAAGDKLVVDFSATWCGPCKMIK--             |
| 01:9606 128202 0#NP_003320 TXN Homo_sapiens                 | -----MVKQIESKTAF--QEALDAAGDKLVVDFSATWCGPCKMIK--             |
| 01:9606 128202 NM_001244938 TXN Homo_sapiens                | --PSVLTAARQTPAAKMVKQIESKTAF--QEALDAAGDKLVVDFSATWCGPCKMIK--  |
| 01:9606 128202 NM_003329 TXN Homo_sapiens                   | --PSVLTAARQTPAAKMVKQIESKTAF--QEALDAAGDKLVVDFSATWCGPCKMIK--  |
| 03:9544 128202 NM_001042732 TXN Macaca_mulatta              | --PSVLTAAPQTPAAKMVKQIESKAAF--QEALNTAGDKLVVDFSATWCGPCKMIK--  |
| 04:9913 128202 NM_173968 TXN Bos_taurus                     | SIDCTVRSVLVRPPAAKMVKQIESKYAF--QEALNSAGEKLVVDFSATWCGPCKMIK-- |
| 06:10116 128202 NM_053800 Txn1 Rattus_norvegicus            | -----MVKLIESKEAF--QEALAAAGDKLVVDFSATWCGPCKMIK--             |
| 07:10090 128202 NM_011660 Txn1 Mus_musculus                 | -----TARMLLQTVKSNACRPSSFIKRVK-----                          |
| 08:9031 128202 NM_205453 TXN Gallus_gallus                  | ---AAFLLCSPGAAAMVKSVMGNLADF--EAEKKAAGEKLVVDFSATWCGPCKMIK--  |
| 09:8364 128202 NM_001130198 LOC100170420 Xenopus_tropicalis | -----VWRSRPSPLSKMVRHVESLDEF--QNILKEAGDKLVVDFATWCGPCKMIS--   |
| 10:7955 128202 NM_001002461 txn Danio_rerio                 | --SGSLQNAARCCPLDITMWLEIEDKAAF--DNALKNAGDKLVVDFATWCGPCTQIG-- |
| 10:7955 128202 NM_200023 zgc:56493 Danio_rerio              | -----SGKMIVVIEDQDGF--DKALAGAGDKLVVDFATWCGPCQISIA--          |
| 12:7227 128202 NM_078802 Trx-2 Drosophila_melanogaster      | --CTFLPVPSPHLPSNMVYQVKDKADL--DGQLTKASGKLVVLDFFATWCGPCKMIS-- |
| 12:7227 128202 NM_164863 Trx-2 Drosophila_melanogaster      | --CTFLPVPSPHLPSNMVYQVKDKADL--DGQLTKASGKLVVLDFFATWCGPCKMIS-- |
| 15:3702 128202 NM_123358 TRX2 Arabidopsis_thaliana          | ---TA-AGTESEPS--RVLKFFSSARWQLHFNEIKESNKLLVDFSASWCGPCRMIE--  |
| 00:1 Ac-MDPFPSVLTAAR                                        | -----                                                       |
| 01:9606 128202 0#NP_001231867 TXN Homo_sapiens              | -----PFFHD-----VASECEVKCMPTFQFFKKKG                         |
| 01:9606 128202 0#NP_003320 TXN Homo_sapiens                 | -----PFFHSLSE--KYSNVIFLEVVDVDDCQDVASECEVKCMPTFQFFKKKG       |
| 01:9606 128202 NM_001244938 TXN Homo_sapiens                | -----PFFHD-----VASECEVKCMPTFQFFKKKG                         |
| 01:9606 128202 NM_003329 TXN Homo_sapiens                   | -----PFFHSLSE--KYSNVIFLEVVDVDDCQDVASECEVKCMPTFQFFKKKG       |
| 03:9544 128202 NM_001042732 TXN Macaca_mulatta              | -----PFFHSLSE--KYSNVVFLLEVVDVDDCQDVASECEVKCMPTFQFFKKKG      |
| 04:9913 128202 NM_173968 TXN Bos_taurus                     | -----PFFHSLSE--KYSNVVFLLEVVDVDDCQDVAAECEVKCMPTFQFFKKKG      |
| 06:10116 128202 NM_053800 Txn1 Rattus_norvegicus            | -----PFFHSLCD--KYSNVVFLLEVVDVDDCQDVAADCEVKCMPTFQFYKKG       |
| 07:10090 128202 NM_011660 Txn1 Mus_musculus                 | RWGSSPVLTRKSLKPLLLNMPN-----HALKSVTSYQLFKTC                  |
| 08:9031 128202 NM_205453 TXN Gallus_gallus                  | -----PFFHSLCD--KFGDVVFIIDVDDAQDVATHCDVKCMPTFQFYKNG          |
| 09:8364 128202 NM_001130198 LOC100170420 Xenopus_tropicalis | -----PVFEKLSV--ENPDVVFIKVDVDDAQDVAACHDVKCMPTFHFYKNG         |
| 10:7955 128202 NM_001002461 txn Danio_rerio                 | -----PYFKLLSEKPENKNVFLKVDVDDAQDVAALCGISCMPTFHFYKNG          |
| 10:7955 128202 NM_200023 zgc:56493 Danio_rerio              | -----PFYKGLSENPDYSNVVFLKVDVDDAQDVAQSCIEKCMPTFHFYKNG         |
| 12:7227 128202 NM_078802 Trx-2 Drosophila_melanogaster      | -----PKLVELSTQ--FADNVVVLKVDVDECEDIAEMEYNISSMPTFVFLKNG       |
| 12:7227 128202 NM_164863 Trx-2 Drosophila_melanogaster      | -----PKLVELSTQ--FADNVVVLKVDVDECEDIAEMEYNISSMPTFVFLKNG       |
| 15:3702 128202 NM_123358 TRX2 Arabidopsis_thaliana          | -----PAIHAMAD--KFNDVDFVKLVDDELDPVAKEFNVTAMPTFVFLVKG         |
| 00:1 Ac-MDPFPSVLTAAR                                        | -----                                                       |
| 01:9606 128202 0#NP_001231867 TXN Homo_sapiens              | -----QKVGEFSGANKEKLEATINELV-----                            |
| 01:9606 128202 0#NP_003320 TXN Homo_sapiens                 | -----QKVGEFSGANKEKLEATINELV-----                            |
| 01:9606 128202 NM_001244938 TXN Homo_sapiens                | -----QKVGEFSGANKEKLEATINELV-----                            |
| 01:9606 128202 NM_003329 TXN Homo_sapiens                   | -----QKVGEFSGANKEKLEATINELV-----                            |
| 03:9544 128202 NM_001042732 TXN Macaca_mulatta              | -----QKVGEFSGANKEKLEATINELV-----                            |
| 04:9913 128202 NM_173968 TXN Bos_taurus                     | -----QKVGEFSGANKEKLEATINELI-----                            |
| 06:10116 128202 NM_053800 Txn1 Rattus_norvegicus            | -----QKVGEFSGANKEKLEATITEFA-----                            |
| 07:10090 128202 NM_011660 Txn1 Mus_musculus                 | TFFNLQKTMKCGESIP----NCHLIINDNKILILPFLKLPDVF                 |
| 08:9031 128202 NM_205453 TXN Gallus_gallus                  | -----KKVQEFSGANKEKLEETIKSLV-----                            |
| 09:8364 128202 NM_001130198 LOC100170420 Xenopus_tropicalis | -----QKVHEFSGANQASLIQKVQDLK-----                            |
| 10:7955 128202 NM_001002461 txn Danio_rerio                 | -----KKVDEFGSGNSQSKLEEKINSHK-----                           |
| 10:7955 128202 NM_200023 zgc:56493 Danio_rerio              | -----KKLDDFGSGSNQTKLEEMVKQHKN-----                          |
| 12:7227 128202 NM_078802 Trx-2 Drosophila_melanogaster      | -----VKVEEFAGANAKRLEDVIKANI-----                            |
| 12:7227 128202 NM_164863 Trx-2 Drosophila_melanogaster      | -----VKVEEFAGANAKRLEDVIKANI-----                            |
| 15:3702 128202 NM_123358 TRX2 Arabidopsis_thaliana          | -----KEIERIIGAKKDELEKKVSKLRA-----                           |

***RPL35A***

Ac-GTGLLKGTMSGR

CLUSTAL O(1.2.1) multiple sequence alignment

00:1|Ac-GTLLKGTMSGR  
01:9606|129020|0#NP\_000987|RPL35A|Homo\_sapiens  
01:9606|129020|NM\_000996|RPL35A|Homo\_sapiens  
02:9598|129020|NM\_001251952|RPL35A|Pan\_troglodytes  
03:9544|129020|NM\_001265744|RPL35A|Macaca\_mulatta  
04:9913|129020|NM\_001025321|RPL35A|Bos\_taurus  
06:10116|129020|NM\_021264|Rpl35a|Rattus\_norvegicus  
07:10090|129020|NM\_001130484|Rpl35a|Mus\_musculus  
07:10090|129020|NM\_001130485|Rpl35a|Mus\_musculus  
07:10090|129020|NM\_021338|Rpl35a|Mus\_musculus  
08:9031|129020|NM\_001277457|RPL35A|Gallus\_gallus  
09:8364|129020|NM\_001005134|rpl35a|Xenopus\_tropicalis  
10:7955|129020|NM\_001002487|rpl35a|Danio\_rerio  
12:7227|129020|NM\_141282|RpL35A|Drosophila\_melanogaster  
13:6239|129020|NM\_063067|rpl-33|Caenorhabditis\_elegans  
15:3702|129020|NM\_100581|AT1G07070|Arabidopsis\_thaliana  
15:3702|129020|NM\_103411|AT1G41880|Arabidopsis\_thaliana  
15:3702|129020|NM\_106087|AT1G74270|Arabidopsis\_thaliana  
15:3702|129020|NM\_115433|AT3G55750|Arabidopsis\_thaliana

00:1|Ac-GTLLKGTMSGR  
01:9606|129020|0#NP\_000987|RPL35A|Homo\_sapiens  
01:9606|129020|NM\_000996|RPL35A|Homo\_sapiens  
02:9598|129020|NM\_001251952|RPL35A|Pan\_troglodytes  
03:9544|129020|NM\_001265744|RPL35A|Macaca\_mulatta  
04:9913|129020|NM\_001025321|RPL35A|Bos\_taurus  
06:10116|129020|NM\_021264|Rpl35a|Rattus\_norvegicus  
07:10090|129020|NM\_001130484|Rpl35a|Mus\_musculus  
07:10090|129020|NM\_001130485|Rpl35a|Mus\_musculus  
07:10090|129020|NM\_021338|Rpl35a|Mus\_musculus  
08:9031|129020|NM\_001277457|RPL35A|Gallus\_gallus  
09:8364|129020|NM\_001005134|rpl35a|Xenopus\_tropicalis  
10:7955|129020|NM\_001002487|rpl35a|Danio\_rerio  
12:7227|129020|NM\_141282|RpL35A|Drosophila\_melanogaster  
13:6239|129020|NM\_063067|rpl-33|Caenorhabditis\_elegans  
15:3702|129020|NM\_100581|AT1G07070|Arabidopsis\_thaliana  
15:3702|129020|NM\_103411|AT1G41880|Arabidopsis\_thaliana  
15:3702|129020|NM\_106087|AT1G74270|Arabidopsis\_thaliana  
15:3702|129020|NM\_115433|AT3G55750|Arabidopsis\_thaliana

00:1|Ac-GTLLKGTMSGR  
01:9606|129020|0#NP\_000987|RPL35A|Homo\_sapiens  
01:9606|129020|NM\_000996|RPL35A|Homo\_sapiens  
02:9598|129020|NM\_001251952|RPL35A|Pan\_troglodytes  
03:9544|129020|NM\_001265744|RPL35A|Macaca\_mulatta  
04:9913|129020|NM\_001025321|RPL35A|Bos\_taurus  
06:10116|129020|NM\_021264|Rpl35a|Rattus\_norvegicus  
07:10090|129020|NM\_001130484|Rpl35a|Mus\_musculus  
07:10090|129020|NM\_001130485|Rpl35a|Mus\_musculus  
07:10090|129020|NM\_021338|Rpl35a|Mus\_musculus  
08:9031|129020|NM\_001277457|RPL35A|Gallus\_gallus  
09:8364|129020|NM\_001005134|rpl35a|Xenopus\_tropicalis  
10:7955|129020|NM\_001002487|rpl35a|Danio\_rerio  
12:7227|129020|NM\_141282|RpL35A|Drosophila\_melanogaster  
13:6239|129020|NM\_063067|rpl-33|Caenorhabditis\_elegans  
15:3702|129020|NM\_100581|AT1G07070|Arabidopsis\_thaliana  
15:3702|129020|NM\_103411|AT1G41880|Arabidopsis\_thaliana  
15:3702|129020|NM\_106087|AT1G74270|Arabidopsis\_thaliana  
15:3702|129020|NM\_115433|AT3G55750|Arabidopsis\_thaliana

-----GTG---LLKGTMSGR-----  
-----MSGRLWSKA  
-----ASSFSYRHLGSCGGLLGTTG---LLKGTMSGRLWSKA  
-----ASSFSYRHLGSCGGLLGTTGLTGLLKGTMSSGRLWSKA  
-----GLLKGTMSGRLWSKA  
-----RPAGNGTSKTTNMSGRLWSKA  
-----MSGRLWSKA  
-----ALGPDWCWLLGTTG---LLTASMSGRLWSKA  
-----HKAARRGLPSSFRHLGACGGLLGTTG---LLTASMSGRLWSKA  
-----FHPSPR---QPGVSENPTARGLLGTTG---LLTASMSGRLWSKA  
-----GPAGTG---LQEDAMSGRLWSKA  
-----ESNMSGRLWSKA  
-----PGQRIIMPGRSLWSKA  
AMADTQAKSTTAPKAAKAQKAPKAVKAPKA-----EKPAASEAKVS AKKYKRHGRFLFAKA  
-----MADTAVARRPSAPTTRGLRYVKA  
-----FLPPDDSTKMVKGRQGERVRLYVRG  
-----KRV-----RRGRRELQGLKMKGRQGERVRLYVRG  
-----AAFGYSAESKMVKGRQGERVRLYVRG  
-----KRV-----RRGRRELQGLKMKGRQGERVRLYVRG  
\*

-----  
IFAGYKRGLRNQREHTALLKIEGVYARDETEFYLGKRCAYVYKAKNNTVTPGGKPN--KT  
IFAGYKRGLRNQREHTALLKIEGVYARDETEFYLGKRCAYVYKAKNNTVTPGGKPN--KT  
IFAGYKRGLRNQREHTALLKIEGVYARDETEFYLGKRCAYVYKAKNNTVTPGGKPN--KT  
IFAGYKRGLRNQREHTALLKIEGVYARDETEFYLGKRCAYVYKAKNNTVTPGGKPN--KT  
IFAGYKRGLRNQREHTALLKIEGVYARDETEFYLGKRCAYVYKAKNNTVTPGGKPN--KT  
IFAGYKRGLRNQREHTALLKIEGVYARDETEFYLGKRCAYVYKAKNNTVTPGGKPN--KT  
IFAGYKRGLRNQREHTALLKIEGVYARDETEFYLGKRCAYVYKAKNNTVTPGGKPN--KT  
IFAGYKRGLRNQREHTALLKIEGVYARDETEFYLGKRCAYVYKAKNNTVTPGGKPN--KT  
TFAGYKRGLRNQREHTALLKIEGVYARQETEFYLGKRCAYVYKAKNNTVTPGGKPN--RT  
TFAGYKRGLRNQREHTALLKIEGVYARDETEFYLGKRCAYVYKAKNNTVTPGGKPN--RT  
IFAGYKRGLRNQREHTALLKIEGVYNRGEVDFYLGKRCAYVYKAKKKTATPGGKPN--KT  
VFTGYKRGLRNQHENQAILKIEGARRKEHGSFYVGKRCVYVYKAETKKCVQHPERKTRV  
IFTGFKRGLRTLQSEHTSLLKLEGVFNKEDAGFYAGKRVVYLYKAHNKTLTKTGHT-VATRT  
TILGYKRSKSNQYPNTSLVQVEGVNTTEEVSWYKGRMAYIYKAKTKK-----NGSHY  
TVLGYKRSKSNQYPNTSLIQIEGVNTQEEVNWYKGRLAYIYKAKTKK-----NGSHY  
TILGYKRSKSNQYPNTSLVQIEGVNTQEEVNWYKGRMAYIYKAKTKK-----NGSHY  
TVLGYKRSKSNQYPNTSLVQIEGVNTQEEVNWYKGRLAYIYKAKTKK-----NGSHY

-----  
RVIWGVVTRAHGNSSGMVRAKFRSNLPAKAIGHRIRVMLYPSRI  
RAVWGVVTRIHGNTGAVRARFNRLPGHAMGHRIRIMLYPSRI  
RAIWGKITRPHGNAGAVRAKFRHNIPPSALGKRIRVLLYPSNI  
RCIWGKVTRPHGNSGVVRAKFTSNLPPKSMGARVRVFMYPNSNI  
RCIWGKVTRPHGNSGVVRSKFTSNLPPKSMGARVRVFMYPNSNI  
RCIWGKVTRPHGNSGVVRAKFTSNLPPKSMGARVRVFMYPNSNI  
RCIWGKVTRPHGNSGVVRSKFTSNLPPKSMGARVRVFMYPNSNI

*ZC3H10*

Ac-AAAAEPSSDVEVETHR

CLUSTAL O(1.2.1) multiple sequence alignment

|                                                      |                                                                 |
|------------------------------------------------------|-----------------------------------------------------------------|
| 00:1 Ac-AAAAEPSSDVEVETHR                             | -----AAAAEPSSDVEVETHR-----                                      |
| 01:9606 13114 0#NP_001290053 ZC3H10 Homo_sapiens     | -----                                                           |
| 01:9606 13114 0#NP_001290054 ZC3H10 Homo_sapiens     | -----                                                           |
| 01:9606 13114 0#NP_116175 ZC3H10 Homo_sapiens        | -----                                                           |
| 01:9606 13114 NM_001303124 ZC3H10 Homo_sapiens       | -----QPPH-S--PPLLLLLPPKSLFFSCSEPSDDEVEVETHRSPGLHLSYLSGHQEWQ     |
| 01:9606 13114 NM_001303125 ZC3H10 Homo_sapiens       | -----EPSSDDEVEVETHRSPGLHLSYLSGHQEWQ                             |
| 01:9606 13114 NM_032786 ZC3H10 Homo_sapiens          | FFRRKRKSDRVGSGLSKLEDRQAAAAATAAAEPSSDDEVEVETHRSPGLHLSYLSGHQEWQ   |
| 04:9913 13114 NM_001097993 ZC3H10 Bos_taurus         | -----VGGSLSKLEDRQAAAAATAAAEPSSDDEVEVETHRSPGLHLSYLSGHQEWQ        |
| 06:10116 13114 NM_001191090 Zc3h10 Rattus_norvegicus | -----EDRQAAAAATAAAEPSSDDEVEVETHGSPGLHLSYLS-HQEWQ                |
| 07:10090 13114 NM_134003 Zc3h10 Mus_musculus         | -----KLEDRQAAAAATAAAEPSSDDEVEVETHGSPGLHLSYLS-RQEWQ              |
| 09:8364 13114 NM_001008144 zc3h10 Xenopus_tropicalis | -----                                                           |
| 10:7955 13114 NM_207098 zc3h10 Danio_rerio           | -----                                                           |
| 00:1 Ac-AAAAEPSSDVEVETHR                             | -----                                                           |
| 01:9606 13114 0#NP_001290053 ZC3H10 Homo_sapiens     | -----MPDRDSYA-NGTGSSGGG-----PGGGGSE                             |
| 01:9606 13114 0#NP_001290054 ZC3H10 Homo_sapiens     | -----MPDRDSYA-NGTGSSGGG-----PGGGGSE                             |
| 01:9606 13114 0#NP_116175 ZC3H10 Homo_sapiens        | -----MPDRDSYA-NGTGSSGGG-----PGGGGSE                             |
| 01:9606 13114 NM_001303124 ZC3H10 Homo_sapiens       | DKE-NPELGGTRMPDRDSYA-NGTGSSGGG-----PGGGGSE                      |
| 01:9606 13114 NM_001303125 ZC3H10 Homo_sapiens       | DKE-NPELGGTRMPDRDSYA-NGTGSSGGG-----PGGGGSE                      |
| 01:9606 13114 NM_032786 ZC3H10 Homo_sapiens          | DKE-NPELGGTRMPDRDSYA-NGTGSSGGG-----PGGGGSE                      |
| 04:9913 13114 NM_001097993 ZC3H10 Bos_taurus         | EKEESPPELGGTRMPDRDSYA-NGTGSSGGG-----PGGGGSE                     |
| 06:10116 13114 NM_001191090 Zc3h10 Rattus_norvegicus | EKKQDPPELGGTRMPDRDSYA-NGTGSSGAG-----PGGGGSE                     |
| 07:10090 13114 NM_134003 Zc3h10 Mus_musculus         | EKEEDPDLGGTRMPDRDSYA-NGTGSSGGG-----PGGGGSE                      |
| 09:8364 13114 NM_001008144 zc3h10 Xenopus_tropicalis | -----ESSAA                                                      |
| 10:7955 13114 NM_207098 zc3h10 Danio_rerio           | -AQRSPAPGSPAMPDRDSAYLAGGGGSGSGDEGGSGTGVGEGRATAVGGGAGGTGGNGGP    |
| 00:1 Ac-AAAAEPSSDVEVETHR                             | -----                                                           |
| 01:9606 13114 0#NP_001290053 ZC3H10 Homo_sapiens     | EASGA---GV----GSGGASSDAICRDFLRNVCKRGKRCRYRHPDMSEVSNLGVSKNEF     |
| 01:9606 13114 0#NP_001290054 ZC3H10 Homo_sapiens     | EASGA---GV----GSGGASSDAICRDFLRNVCKRGKRCRYRHPDMSEVSNLGVSKNEF     |
| 01:9606 13114 0#NP_116175 ZC3H10 Homo_sapiens        | EASGA---GV----GSGGASSDAICRDFLRNVCKRGKRCRYRHPDMSEVSNLGVSKNEF     |
| 01:9606 13114 NM_001303124 ZC3H10 Homo_sapiens       | EASGA---GV----GSGGASSDAICRDFLRNVCKRGKRCRYRHPDMSEVSNLGVSKNEF     |
| 01:9606 13114 NM_001303125 ZC3H10 Homo_sapiens       | EASGA---GV----GSGGASSDAICRDFLRNVCKRGKRCRYRHPDMSEVSNLGVSKNEF     |
| 01:9606 13114 NM_032786 ZC3H10 Homo_sapiens          | EASGA---GV----GSGGASSDAICRDFLRNVCKRGKRCRYRHPDMSEVSNLGVSKNEF     |
| 04:9913 13114 NM_001097993 ZC3H10 Bos_taurus         | EASGT---GA----GSGGASSDAICRDFLRNVCKRGKRCRYRHPDMSEVSNLGVSKNEF     |
| 06:10116 13114 NM_001191090 Zc3h10 Rattus_norvegicus | EASGA---GT----GSGGATSDAICRDFLRNVCKRGKRCRYRHPDMSEVSNLGVSKNEF     |
| 07:10090 13114 NM_134003 Zc3h10 Mus_musculus         | EASGA---GT----GSGGATSDAICRDFLRNVCKRGKRCRYRHPDMSEVSNLGVSKNEF     |
| 09:8364 13114 NM_001008144 zc3h10 Xenopus_tropicalis | KTMPNRENVASCSSSEAAAVVEHVCRDFLRNVCKRGKRCRFKHPDADDVSDLGVQKNEF     |
| 10:7955 13114 NM_207098 zc3h10 Danio_rerio           | GAMGGG-GALGNGNSSSSALGLDGVCRDFLRNVCKRGKRCRFRHPDFNEVPDLGVQKNEF    |
| 00:1 Ac-AAAAEPSSDVEVETHR                             | -----                                                           |
| 01:9606 13114 0#NP_001290053 ZC3H10 Homo_sapiens     | IFCHDFQNKCESRPNCRFIHGSKEDEDGYKKTGELPPRLRQKVAAGLGLSPADLPNGKEE    |
| 01:9606 13114 0#NP_001290054 ZC3H10 Homo_sapiens     | IFCHDFQNKCESRPNCRFIHGSKEDEDGYKKTGELPPRLRQKVAAGLGLSPADLPNGKEE    |
| 01:9606 13114 0#NP_116175 ZC3H10 Homo_sapiens        | IFCHDFQNKCESRPNCRFIHGSKEDEDGYKKTGELPPRLRQKVAAGLGLSPADLPNGKEE    |
| 01:9606 13114 NM_001303124 ZC3H10 Homo_sapiens       | IFCHDFQNKCESRPNCRFIHGSKEDEDGYKKTGELPPRLRQKVAAGLGLSPADLPNGKEE    |
| 01:9606 13114 NM_001303125 ZC3H10 Homo_sapiens       | IFCHDFQNKCESRPNCRFIHGSKEDEDGYKKTGELPPRLRQKVAAGLGLSPADLPNGKEE    |
| 01:9606 13114 NM_032786 ZC3H10 Homo_sapiens          | IFCHDFQNKCESRPNCRFIHGSKEDEDGYKKTGELPPRLRQKVAAGLGLSPADLPNGKEE    |
| 04:9913 13114 NM_001097993 ZC3H10 Bos_taurus         | IFCHDFQNKCESRPNCRFIHGSKEDEDGYKKTGELPPRLRQKVAAGLGLSPADLPNGKEE    |
| 06:10116 13114 NM_001191090 Zc3h10 Rattus_norvegicus | IFCHDFQNKCESRPNCRFIHGSKEDEDGYKKTGELPPRLRQKVAAGLGLSPADLPNGKEE    |
| 07:10090 13114 NM_134003 Zc3h10 Mus_musculus         | IFCHDFQNKCESRPNCRFIHGSKEDEDGYKKTGELPPRLRQKVAAGLGLSPADLPNGKEE    |
| 09:8364 13114 NM_001008144 zc3h10 Xenopus_tropicalis | VFCHDFQNKCECVRLNCRFIHGTKDDEEHYKKTGELPPRLRHKVAAGLGLSPTDLPN-KDE   |
| 10:7955 13114 NM_207098 zc3h10 Danio_rerio           | IFCHDHQNKCEVRPNCRFVHGSKEDEDYKKTGELPLRLRGKVAAGLGLSPTDLPFSRGE     |
| 00:1 Ac-AAAAEPSSDVEVETHR                             | -----                                                           |
| 01:9606 13114 0#NP_001290053 ZC3H10 Homo_sapiens     | VPICRDFLKGDCQRGAKCKFRHLQDFFEFDARGG-----GGTGG                    |
| 01:9606 13114 0#NP_001290054 ZC3H10 Homo_sapiens     | VPICRDFLKGDCQRGAKCKFRHLQDFFEFDARGG-----GGTGG                    |
| 01:9606 13114 0#NP_116175 ZC3H10 Homo_sapiens        | VPICRDFLKGDCQRGAKCKFRHLQDFFEFDARGG-----GGTGG                    |
| 01:9606 13114 NM_001303124 ZC3H10 Homo_sapiens       | VPICRDFLKGDCQRGAKCKFRHLQDFFEFDARGG-----GGTGG                    |
| 01:9606 13114 NM_001303125 ZC3H10 Homo_sapiens       | VPICRDFLKGDCQRGAKCKFRHLQDFFEFDARGG-----GGTGG                    |
| 01:9606 13114 NM_032786 ZC3H10 Homo_sapiens          | VPICRDFLKGDCQRGAKCKFRHLQDFFEFDARGG-----GGTGG                    |
| 04:9913 13114 NM_001097993 ZC3H10 Bos_taurus         | VPICRDFLKGDCQRGAKCKFRHLQDFFEFDARGG-----GGTGG                    |
| 06:10116 13114 NM_001191090 Zc3h10 Rattus_norvegicus | VPICRDFLKGDCQRGTKCKFRHLQDFFEFEARGG-----GGTGG                    |
| 07:10090 13114 NM_134003 Zc3h10 Mus_musculus         | VPICRDFLKGDCQRGAKCKFRHLQDFFEFDARGG-----GGTGG                    |
| 09:8364 13114 NM_001008144 zc3h10 Xenopus_tropicalis | VPICRDFLKGDCQGRDCKFRHLQREYENQYDYSCEM-----RGMMNM-----            |
| 10:7955 13114 NM_207098 zc3h10 Danio_rerio           | VPICRDYLGKECQGRGNKCKFRHVRYKDYDYEAASSRVGVGCMIGVTGGVSGMVNSGGGGAGG |
| 00:1 Ac-AAAAEPSSDVEVETHR                             | -----                                                           |
| 01:9606 13114 0#NP_001290053 ZC3H10 Homo_sapiens     | -GST-----GSVLPGR-----RHDLYD                                     |
| 01:9606 13114 0#NP_001290054 ZC3H10 Homo_sapiens     | -GST-----GSVLPGR-----RHDLYD                                     |
| 01:9606 13114 0#NP_116175 ZC3H10 Homo_sapiens        | -GST-----GSVLPGR-----RHDLYD                                     |
| 01:9606 13114 NM_001303124 ZC3H10 Homo_sapiens       | -GST-----GSVLPGR-----RHDLYD                                     |
| 01:9606 13114 NM_001303125 ZC3H10 Homo_sapiens       | -GST-----GSVLPGR-----RHDLYD                                     |
| 01:9606 13114 NM_032786 ZC3H10 Homo_sapiens          | -GST-----GSVLPGR-----RHDLYD                                     |
| 04:9913 13114 NM_001097993 ZC3H10 Bos_taurus         | GGST-----GPIPPGR-----RHDLYD                                     |
| 06:10116 13114 NM_001191090 Zc3h10 Rattus_norvegicus | GGST-----GSAPPGR-----RHDLYD                                     |
| 07:10090 13114 NM_134003 Zc3h10 Mus_musculus         | GGST-----GSAPPGR-----RHDLYD                                     |
| 09:8364 13114 NM_001008144 zc3h10 Xenopus_tropicalis | -GVSPGSL---SAPTTTRYEQ-----Y-                                    |
| 10:7955 13114 NM_207098 zc3h10 Danio_rerio           | VGSACGGMAGLVAGGVGNYIGMGCPSLGGCREQGLSGGVGGGSGLSGCLSIGTAGHRRYD    |

```

-----IYD-LPDRGFEDHEP-----GPKRRRGGCCPPDGPHFESYFY--SLAP
-----IYD-LPDRGFEDHEP-----GPKRRRGGCCPPDGPHFESYFY--SLAP
-----IYD-LPDRGFEDHEP-----GPKRRRGGCCPPDGPHFESYFY--SLAP
-----IYD-LPDRGFEDHEP-----GPKRRRGGCCPPDGPHFESYFY--SLAP
-----IYD-LPDRGFEDHEP-----GPKRRRGGCCPPDGPHFESYFY--SLAP
-----IYD-LPDRGFEDHEP-----GPKRRRGGCCPPDGPHFESYFY--SLAP
-----IYD-LPDRGFEDHEP-----GPKRRRGGCCPPDGPHFESYDY--SLAP
-----IYD-LPERGFEDHEP-----GPKRRRGGCCPPDGPHFESYEC--NLAP
-----IYD-LPERGFEDHEP-----GPKRRRGGCCPPDGPHFESYEC--NLAP
----GNYDGLTDTEYYSSYY-----R-YG-DRFDDPVMKRRRMGYDGYYS
RGPCSVYDPLFENGIFEAGPVEAPVDHTVLQLKRRRLLEGLRLADGTSGGHYDLGLQATLA

```

PRGVECRLEEENAMLRKRVEELKKQVSNLLATNEVLLLEQNAQFRNQAKVITLSSTAPAT  
PRGVECRLEEENAMLRKRVEELKKQVSNLLATNEVLLLEQNAQFRNQAKVITLSSTAPAT  
PRGVECRLEEENAMLRKRVEELKKQVSNLLATNEVLLLEQNAQFRNQAKVITLSSTAPAT  
PRGVECRLEEENAMLRKRVEELKKQVSNLLATNEVLLLEQNAQFRNQAKVITLSSTAPAT  
PRGVECRLEEENAMLRKRVEELKKQVSNLLATNEVLLLEQNAQFRNQAKVITLSSTAPAT  
PRGVECRLEEENAMLRKRVEELKKQVSNLLATNEVLLLEQNAQFRNQAKVMTLSSTAPAT  
LRGVECRLEEENALLRKRVEELKKQVSNLLATNEVLLLEQNAQFRNQAKVMTLSSTAPAT  
LRGVECRLEEENALLRKRVEELKKQVSNLLATNEVLLLEQNAQFRNQAKVMTLSSTAPAT  
ASPVYRLLLEENVMRRRVEDKKQVSVLAATNEVLLDQNAQFRSQAKVVTLSLTST-T  
TRPVYRLLLEENALLRKRVEELKKQVSNLIATNEVLLLEQNAQFRSQAKVMTLSSTPAPS

-----  
EQTLPATVGTGTVATFNH GIAQTH TLTSSQALQPRPV SQQELVAPAGAPAAPPTNAAPPAAP  
APTSEQVGSVNTYNH GIAQTH TLTSSQALQPRV TQQELVASSGAPASAQSN -----  
EQSLAPPGVSVSSYNH GIAQTH TLTSSAGLQTRPV TQQDLVPSGAPTAPPAANAAPPTA

```
PPPPPHLTPEITPLSAAALQTTIAQGMAPPPVSMAPVAVSVAPVAPVAVSMAQPLAGITMS  
PPPPPHLTPEITPLSAAALQTTIAQGMAPPPVSMAPVAVSVAPVAPVAVSMAQPLAGITMS  
PPPPPHLTPEITPLSAAALQTTIAQGMAPPPVSMAPVAVSVAPVAPVAVSMAQPLAGITMS  
PPPPPHLTPEITPLSAAALQTTIAQGMAPPPVSMAPVAVSVAPVAPVAVSMAQPLAGITMS  
PPPPPHLTPEITPLSAAALQTTIAQGMAPPPVSMAPVAVSVAPVAPVAVSMAQPLAGITMS  
PPPPPHLTPEITPLSAAALQTTIAQGMAPPPVSMAPVAVSVAPVAPVAVSMAQPLAGITMS  
PPPPPHLNPETPLSAAALQTTIAQGMAPPPVSMAPVAVSVAPVAPVAVSMAQPLAGITMS  
--APQQLNPEIAPLSAALAQTIAQGMAPPPVSMAPVAVSVA---PVAVSMAQPLPGITMS  
P---PHLNP---DPLSAAALQTTIAQGMAP--PVSMAPVAVSVA---PVAVSMAQPLPGITMS
```

[illegible]

*PPIA*

Ac-FCLLFADKVPKTAENFR

CLUSTAL O(1.2.1) multiple sequence alignment

|                                                       |                                                               |
|-------------------------------------------------------|---------------------------------------------------------------|
| 00:1 Ac-FCLLFADKVPKTAENFR                             | -----FCLLFADKV                                                |
| 01:9606 134504 0#NP_001287910 PPIA Homo_sapiens       | -----                                                         |
| 01:9606 134504 0#NP_066953 PPIA Homo_sapiens          | -----MVNPTVFFDIAVDGEPLGRVSFELFADKV                            |
| 01:9606 134504 NM_001300981 PPIA Homo_sapiens         | -----SCSSACCSLEFCLLFADKV                                      |
| 01:9606 134504 NM_021130 PPIA Homo_sapiens            | GRTWYKRGGRPGSCRFADAT--AEENRVLLAMVNPTVFFDIAVDGEPLGRVSFELFADKV  |
| 01:9606 134504 NM_203430 PPIA Homo_sapiens            | -----SCSSACCSLEFCLLFADKV                                      |
| 01:9606 134504 NM_203431 PPIA Homo_sapiens            | -----SYVNRLLELFADKV                                           |
| 03:9544 134504 NM_001032809 PPIA Macaca_mulatta       | -----MVNPTVFFDIAVDGEPLGRVSFELFADKV                            |
| 06:10116 134504 NM_017101 Ppia Rattus_norvegicus      | -----LCR--RR--CLFSPLAADMVNPTVFFDITADGEPLGRVCFELFADKV          |
| 07:10090 134504 NM_008907 Ppia Mus_musculus           | -----CRRH--CRFSPLAAAMVNPTVFFDITADDEPLGRVSFELFADKV             |
| 08:9031 134504 NM_001166326 PPIA Gallus_gallus        | -----MANPVVFFDIAANGEPLGRVTFELFADKV                            |
| 10:7955 134504 NM_212758 ppiaa Danio_rerio            | -----YGAR--FTRFST-A--SANGKESKAMARPKVFDFLTAGGNPVGRRVVMELRADVV  |
| 13:6239 134504 NM_074160 cyn-1 Caenorhabditis_elegans | -----MKFLLRASSLAGQSLRFASQRPKVFFDVSIGEEPAGRVTMELFNDVV          |
| 15:3702 134504 NM_001084832 ROC2 Arabidopsis_thaliana | -----TNLRLPLQSKMANPKVFFDILIGKMKAGRVMELFADVT                   |
| 15:3702 134504 NM_115465 ROC2 Arabidopsis_thaliana    | -----EDEFEIASAKSKMANPKVFFDILIGKMKAGRVMELFADVT                 |
| 00:1 Ac-FCLLFADKVPKTAENFR                             | PKTAENFR-----                                                 |
| 01:9606 134504 0#NP_001287910 PPIA Homo_sapiens       | -----MCQGGDFTRHNGTGGKSIYGEK                                   |
| 01:9606 134504 0#NP_066953 PPIA Homo_sapiens          | PKTAENFRALSTGEKGFG-----YKGSCFHRIIPGFMCQGGDFTRHNGTGGKSIYGEK    |
| 01:9606 134504 NM_001300981 PPIA Homo_sapiens         | PKTAENFRALSTGEKGFG-----YKGSCFHRIIPGFMCQGGDFTRHNGTGGKSIYGEK    |
| 01:9606 134504 NM_021130 PPIA Homo_sapiens            | PKTAENFRALSTGEKGFG-----YKGSCFHRIIPGFMCQGGDFTRHNGTGGKSIYGEK    |
| 01:9606 134504 NM_203430 PPIA Homo_sapiens            | PKTAENFRALSTGEKGFG-----YKGSCFHRIIPGFMCQGGDFTRHNGTGGKSIYGEK    |
| 01:9606 134504 NM_203431 PPIA Homo_sapiens            | PKTAENFRALSTGEKGFG-----YKGSCFHRIIPGFMCQGGDFTRHNGTGGKSIYGEK    |
| 03:9544 134504 NM_001032809 PPIA Macaca_mulatta       | PKTAENFRALSTGEKGFG-----YKGSCFHRIIPGFMCQGGDFTRHNGTGGKSIYGEK    |
| 06:10116 134504 NM_017101 Ppia Rattus_norvegicus      | PKTAENFRALSTGEKGFG-----YKGSSFHRIIPGFMCQGGDFTRHNGTGGKSIYGEK    |
| 07:10090 134504 NM_008907 Ppia Mus_musculus           | PKTAENFRALSTGEKGFG-----YKGSSFHRIIPGFMCQGGDFTRHNGTGGRSIYGEK    |
| 08:9031 134504 NM_001166326 PPIA Gallus_gallus        | PITAENFRALSTGEKGFG-----YKGSCFHRIIPGFMCQGGDFTRHNGTGGKSIYGEK    |
| 10:7955 134504 NM_212758 ppiaa Danio_rerio            | PRTAENFRQLCTGQPGYG-----YKGSSFHRVIPGFMCQGGDFTRHNGTGGKSIYGNK    |
| 13:6239 134504 NM_074160 cyn-1 Caenorhabditis_elegans | PKTAENFRALCTGEKGVGEQGVALHFKGSKFHRIIPFEMIQGGDFTRHNGTGGESIYGNK  |
| 15:3702 134504 NM_001084832 ROC2 Arabidopsis_thaliana | PRTANNFRALCTGENGIGKAGKALHYKGSFAFHRIIPGFMCQGGDFTRNGTGGESIYGSK  |
| 15:3702 134504 NM_115465 ROC2 Arabidopsis_thaliana    | PRTANNFRALCTGENGIGKAGKALHYKGSFAFHRIIPGFMCQGGDFTRNGTGGESIYGSK  |
| 00:1 Ac-FCLLFADKVPKTAENFR                             | -----                                                         |
| 01:9606 134504 0#NP_001287910 PPIA Homo_sapiens       | FEDENFILKHTGPGILSMANAGPNTNGSQFFICTAKTEWLDGKHVVFGKVKEGMNIVEAM  |
| 01:9606 134504 0#NP_066953 PPIA Homo_sapiens          | FEDENFILKHTGPGILSMANAGPNTNGSQFFICTAKTEWLDGKHVVFGKVKEGMNIVEAM  |
| 01:9606 134504 NM_001300981 PPIA Homo_sapiens         | FEDENFILKHTGPGILSMANAGPNTNGSQFFICTAKTEWLDGKHVVFGKVKEGMNIVEAM  |
| 01:9606 134504 NM_021130 PPIA Homo_sapiens            | FEDENFILKHTGPGILSMANAGPNTNGSQFFICTAKTEWLDGKHVVFGKVKEGMNIVEAM  |
| 01:9606 134504 NM_203430 PPIA Homo_sapiens            | FEDENFILKHTGPGILSMANAGPNTNGSQFFICTAKTEWLDGKHVVFGKVKEGMNIVEAM  |
| 01:9606 134504 NM_203431 PPIA Homo_sapiens            | FEDENFILKHTGPGILSMANAGPNTNGSQFFICTAKTEWLDGKHVVFGKVKEGMNIVEAM  |
| 03:9544 134504 NM_001032809 PPIA Macaca_mulatta       | FEDENFILKHTGPGILSMANAGPNTNGSQFFICTAKTEWLDGKHVVFGKVKEGMNIVEAM  |
| 06:10116 134504 NM_017101 Ppia Rattus_norvegicus      | FEDENFILKHTGPGILSMANAGPNTNGSQFFICTAKTEWLDGKHVVFGKVKEGMSIVEAM  |
| 07:10090 134504 NM_008907 Ppia Mus_musculus           | FEDENFILKHTGPGILSMANAGPNTNGSQFFICTAKTEWLDGKHVVFGKVKEGMNIVEAM  |
| 08:9031 134504 NM_001166326 PPIA Gallus_gallus        | FADENFILKHTGPGILSMANAGPNTNGSQFFICTAKTEWLDGKHVVFGRVKEGMNVVEAM  |
| 10:7955 134504 NM_212758 ppiaa Danio_rerio            | FADENFNLKHTGAGCLSMANAGPNTNGSQFFICTALTSLWDGKHVVFGVQVVEGLDVIKKV |
| 13:6239 134504 NM_074160 cyn-1 Caenorhabditis_elegans | FKDENFDLKHTGPGCLSMANAGPNTNGSQFFICTVDPWLDGGHVVFGQVTDGMSVVKKI   |
| 15:3702 134504 NM_001084832 ROC2 Arabidopsis_thaliana | FEDENFKLKHTGPGILSMANSGPNTNGSQFFICTEKTSLWDGKHVVFGKVVDGYNVVKAM  |
| 15:3702 134504 NM_115465 ROC2 Arabidopsis_thaliana    | FEDENFKLKHTGPGILSMANSGPNTNGSQFFICTEKTSLWDGKHVVFGKVVDGYNVVKAM  |
| 00:1 Ac-FCLLFADKVPKTAENFR                             | -----                                                         |
| 01:9606 134504 0#NP_001287910 PPIA Homo_sapiens       | ERFGSRNGKTSKKITIADCGQLE----                                   |
| 01:9606 134504 0#NP_066953 PPIA Homo_sapiens          | ERFGSRNGKTSKKITIADCGQLE----                                   |
| 01:9606 134504 NM_001300981 PPIA Homo_sapiens         | ERFGSRNGKTSKKITIADCGQLE----                                   |
| 01:9606 134504 NM_021130 PPIA Homo_sapiens            | ERFGSRNGKTSKKITIADCGQLE----                                   |
| 01:9606 134504 NM_203430 PPIA Homo_sapiens            | ERFGSRNGKTSKKITIADCGQLE----                                   |
| 01:9606 134504 NM_203431 PPIA Homo_sapiens            | ERFGSRNGKTSKKITIADCGQLE----                                   |
| 03:9544 134504 NM_001032809 PPIA Macaca_mulatta       | ERFGSRNGKTSKKITIADCGQLE----                                   |
| 06:10116 134504 NM_017101 Ppia Rattus_norvegicus      | ERFGSRNGKTSKKITISDCGQL-----                                   |
| 07:10090 134504 NM_008907 Ppia Mus_musculus           | ERFGSRNGKTSKKITISDCGQL-----                                   |
| 08:9031 134504 NM_001166326 PPIA Gallus_gallus        | ERCGSKDGKTSKQITISNCGQLS----                                   |
| 10:7955 134504 NM_212758 ppiaa Danio_rerio            | EGFGSSSGKTSAKIIADCGQL-----                                    |
| 13:6239 134504 NM_074160 cyn-1 Caenorhabditis_elegans | EKMGSRS GAPAKTVTIADCGELKSE--                                  |
| 15:3702 134504 NM_001084832 ROC2 Arabidopsis_thaliana | EDVGSMDGNPSESVVIEDCGELKNPSS                                   |
| 15:3702 134504 NM_115465 ROC2 Arabidopsis_thaliana    | EDVGSMDGNPSESVVIEDCGELKNPSS                                   |

*CHTOP*

Ac-AAPGGALASVSFDSR

CLUSTAL O(1.2.1) multiple sequence alignment

|         |  |                    |  |                |                    |                                                               |
|---------|--|--------------------|--|----------------|--------------------|---------------------------------------------------------------|
| 00:1    |  | Ac-AAPGGALASVSFDSR |  |                |                    | AAPGGALASVSFDSR                                               |
| 01:9606 |  | 134556             |  | 0#NP_001193541 | CHTOP Homo_sapiens | -----MAAQ                                                     |
| 01:9606 |  | 134556             |  | 0#NP_001231593 | CHTOP Homo_sapiens | -----MAAQ                                                     |
| 01:9606 |  | 134556             |  | 0#NP_056422    | CHTOP Homo_sapiens | -----MAAQ                                                     |
| 01:9606 |  | 134556             |  | NM_001206612   | CHTOP Homo_sapiens | -----LTRAPPPSTQVRPVPGPPAGAVVAAPGGALASVSFDSRDSKMAAQ            |
| 01:9606 |  | 134556             |  | NM_001244664   | CHTOP Homo_sapiens | -----LTRAPPPSTQVRPVPGPPAGAVVAAPGGALASVSFDSRDSKMAAQ            |
| 01:9606 |  | 134556             |  | NM_015607      | CHTOP Homo_sapiens | -----LTRAPPPSTQVRPVPGPPAGAVVAAPGGALASVSFDSRDSKMAAQ            |
| 04:9913 |  | 134556             |  | NM_001035481   | CHTOP Bos_taurus   | LNNLPLNTSNQPPTKLTRAPPPSTQVRPASGPPAAAVVAAPGGALASVSFDSRDLKMAAQ  |
|         |  |                    |  |                |                    |                                                               |
| 00:1    |  | Ac-AAPGGALASVSFDSR |  |                |                    |                                                               |
| 01:9606 |  | 134556             |  | 0#NP_001193541 | CHTOP Homo_sapiens | SAPKVVVKSTTKMSLNERFTNMLKNKQPTPVNIRASMQQQQLASARNRRLAQQMENRPS   |
| 01:9606 |  | 134556             |  | 0#NP_001231593 | CHTOP Homo_sapiens | SAPKVVVKSTTKMSLNERFTNMLKNKQPTPVNIRASMQQQQLASARNRRLAQQMENRPS   |
| 01:9606 |  | 134556             |  | 0#NP_056422    | CHTOP Homo_sapiens | SAPKVVVKSTTKMSLNERFTNMLKNKQPTPVNIRASMQQQQLASARNRRLAQQMENRPS   |
| 01:9606 |  | 134556             |  | NM_001206612   | CHTOP Homo_sapiens | SAPKVVVKSTTKMSLNERFTNMLKNKQPTPVNIRASMQQQQLASARNRRLAQQMENRPS   |
| 01:9606 |  | 134556             |  | NM_001244664   | CHTOP Homo_sapiens | SAPKVVVKSTTKMSLNERFTNMLKNKQPTPVNIRASMQQQQLASARNRRLAQQMENRPS   |
| 01:9606 |  | 134556             |  | NM_015607      | CHTOP Homo_sapiens | SAPKVVVKSTTKMSLNERFTNMLKNKQPTPVNIRASMQQQQLASARNRRLAQQMENRPS   |
| 04:9913 |  | 134556             |  | NM_001035481   | CHTOP Bos_taurus   | SAPKVVVKSTTKMSLNERFTNMLKNKQMPVNIRASMQQQQLASARNRRLAQQMENRPS    |
|         |  |                    |  |                |                    |                                                               |
| 00:1    |  | Ac-AAPGGALASVSFDSR |  |                |                    |                                                               |
| 01:9606 |  | 134556             |  | 0#NP_001193541 | CHTOP Homo_sapiens | VQAALKLKQKSLKQRLGKSNIQARLGRPIGALARGAIGGRGLPIIQRGLPRGGLRGGRAT  |
| 01:9606 |  | 134556             |  | 0#NP_001231593 | CHTOP Homo_sapiens | VQAALKLKQVGV-----                                             |
| 01:9606 |  | 134556             |  | 0#NP_056422    | CHTOP Homo_sapiens | VQAALKLKQ-SLKQRLGKSNIQARLGRPIGALARGAIGGRGLPIIQRGLPRGGLRGGRAT  |
| 01:9606 |  | 134556             |  | NM_001206612   | CHTOP Homo_sapiens | VQAALKLKQKSLKQRLGKSNIQARLGRPIGALARGAIGGRGLPIIQRGLPRGGLRGGRAT  |
| 01:9606 |  | 134556             |  | NM_001244664   | CHTOP Homo_sapiens | VQAALKLKQVGV-----                                             |
| 01:9606 |  | 134556             |  | NM_015607      | CHTOP Homo_sapiens | VQAALKLKQ-SLKQRLGKSNIQARLGRPIGALARGAIGGRGLPIIQRGLPRGGLRGGRAT  |
| 04:9913 |  | 134556             |  | NM_001035481   | CHTOP Bos_taurus   | VQAALKLKQ-SLKQRLGKSNIQARLGRPIGALARGAIGGRGLPIIQRGLPRGGLRGGRAT  |
|         |  |                    |  |                |                    |                                                               |
| 00:1    |  | Ac-AAPGGALASVSFDSR |  |                |                    |                                                               |
| 01:9606 |  | 134556             |  | 0#NP_001193541 | CHTOP Homo_sapiens | RTLLRGGMSLRGQNLLRGGRAVAPRMGLRRGGVVRGGPGRGGGLGRGAMGRGGIGGRGRG  |
| 01:9606 |  | 134556             |  | 0#NP_001231593 | CHTOP Homo_sapiens | RTLLRGGMSLRGQNLLRGGRAVAPRMGLRRGGVVRGGPGRGGGLGRGAMGRGGIGGRGRG  |
| 01:9606 |  | 134556             |  | 0#NP_056422    | CHTOP Homo_sapiens | RTLLRGGMSLRGQNLLRGGRAVAPRMGLRRGGVVRGGPGRGGGLGRGAMGRGGIGGRGRG  |
| 01:9606 |  | 134556             |  | NM_001206612   | CHTOP Homo_sapiens | RTLLRGGMSLRGQNLLRGGRAVAPRMGLRRGGVVRGGPGRGGGLGRGAMGRGGIGGRGRG  |
| 01:9606 |  | 134556             |  | NM_001244664   | CHTOP Homo_sapiens | RTLLRGGMSLRGQNLLRGGRAVAPRMGLRRGGVVRGGPGRGGGLGRGAMGRGGIGGRGRG  |
| 01:9606 |  | 134556             |  | NM_015607      | CHTOP Homo_sapiens | RTLLRGGMSLRGQNLLRGGRAVAPRMGLRRGGVVRGGPGRGGGLGRGAMGRGGIGGRGRG  |
| 04:9913 |  | 134556             |  | NM_001035481   | CHTOP Bos_taurus   | RTLLRGGMSLRGQNLLRGGRAVAPRMGLRRGGVVRGGPGRGGGLGRGAMGRGGIGGRGRG  |
|         |  |                    |  |                |                    |                                                               |
| 00:1    |  | Ac-AAPGGALASVSFDSR |  |                |                    |                                                               |
| 01:9606 |  | 134556             |  | 0#NP_001193541 | CHTOP Homo_sapiens | MIGRGRGGFGGRGRGRGRGALARPVLTKEQQLDNQLDAYMSKTKGHLDAELDAYMAQTD   |
| 01:9606 |  | 134556             |  | 0#NP_001231593 | CHTOP Homo_sapiens | -----                                                         |
| 01:9606 |  | 134556             |  | 0#NP_056422    | CHTOP Homo_sapiens | MIGRGRGGFGGRGRGRGRGRGALARPVLTKEQQLDNQLDAYMSKTKGHLDAELDAYMAQTD |
| 01:9606 |  | 134556             |  | NM_001206612   | CHTOP Homo_sapiens | MIGRGRGGFGGRGRGRGRGRGALARPVLTKEQQLDNQLDAYMSKTKGHLDAELDAYMAQTD |
| 01:9606 |  | 134556             |  | NM_001244664   | CHTOP Homo_sapiens | -----                                                         |
| 01:9606 |  | 134556             |  | NM_015607      | CHTOP Homo_sapiens | MIGRGRGGFGGRGRGRGRGRGALARPVLTKEQQLDNQLDAYMSKTKGHLDAELDAYMAQTD |
| 04:9913 |  | 134556             |  | NM_001035481   | CHTOP Bos_taurus   | MIGRGRGGFGGRGRGRGRGRGALARPVLTKEQQLDNQLDAYMSKTKGHLDAELDAYMAQTD |
|         |  |                    |  |                |                    |                                                               |
| 00:1    |  | Ac-AAPGGALASVSFDSR |  |                |                    |                                                               |
| 01:9606 |  | 134556             |  | 0#NP_001193541 | CHTOP Homo_sapiens | PETND                                                         |
| 01:9606 |  | 134556             |  | 0#NP_001231593 | CHTOP Homo_sapiens | -----                                                         |
| 01:9606 |  | 134556             |  | 0#NP_056422    | CHTOP Homo_sapiens | PETND                                                         |
| 01:9606 |  | 134556             |  | NM_001206612   | CHTOP Homo_sapiens | PETND                                                         |
| 01:9606 |  | 134556             |  | NM_001244664   | CHTOP Homo_sapiens | -----                                                         |
| 01:9606 |  | 134556             |  | NM_015607      | CHTOP Homo_sapiens | PETND                                                         |
| 04:9913 |  | 134556             |  | NM_001035481   | CHTOP Bos_taurus   | PETND                                                         |

*NMNAT3*

Ac-ATATGVDPDKMKSR

CLUSTAL O(1.2.1) multiple sequence alignment

|                                                   |                                                                 |
|---------------------------------------------------|-----------------------------------------------------------------|
| 00:1 Ac-ATATGVDVPDKMKSR                           | -----ATATGVDVPDKMKSR-----                                       |
| 01:9606 135792 0#NP_001186976 NMNAT3 Homo_sapiens | -----MKSRI PVVLLA-----CGSFN-----                                |
| 01:9606 135792 0#NP_835471 NMNAT3 Homo_sapiens    | -MY--QVIQGIISP VNDTYGKKDLAASHHRVAMARLALQTS DWIRVDPWESEQAQWME--  |
| 01:9606 135792 NM_001200047 NMNAT3 Homo_sapiens   | SAFHSCLVSQLISR VATATGVDVPDKMKSRIPV VLLA-----CGSFN-----          |
| 01:9606 135792 NM_178177 NMNAT3 Homo_sapiens      | GM Y--QVIQGIISP VNDTYGKKDLAASHHRVAMARLALQTS DWIRVDPWESEQAQWME-- |
| 04:9913 135792 NM_001098120 DTWD1 Bos_taurus      | -----KMSLNTPVFLKER--EEDTSKFVEIQ                                 |
| 00:1 Ac-ATATGVDVPDKMKSR                           | -----                                                           |
| 01:9606 135792 0#NP_001186976 NMNAT3 Homo_sapiens | -----PITNMHL--RMFE-----VARDH-----LHQT                           |
| 01:9606 135792 0#NP_835471 NMNAT3 Homo_sapiens    | -----TVKVLRRHHS--KLLRSPPQMEGPDH----GKALF-----STPA               |
| 01:9606 135792 NM_001200047 NMNAT3 Homo_sapiens   | -----PITNMHL--RMFE-----VARDH-----LHQT                           |
| 01:9606 135792 NM_178177 NMNAT3 Homo_sapiens      | -----TVKVLRRHHS--KLLRSPPQMEGPDH----GKALF-----STPA               |
| 04:9913 135792 NM_001098120 DTWD1 Bos_taurus      | QSQTTCIAAEDPLQNLCLASQDVLKNA-QQNGRSKCLKCGGSRMFYCYTCYVPVENVPVE    |
| 00:1 Ac-ATATGVDVPDKMKSR                           | -----                                                           |
| 01:9606 135792 0#NP_001186976 NMNAT3 Homo_sapiens | AVPELKLLCGADV LKTFQTP----NLWKDAHIQEIVEKFGLVCVGRVGHDPKGYI---A    |
| 01:9606 135792 0#NP_835471 NMNAT3 Homo_sapiens    | AVPELKLLCGADV LKTFQTP----NLWKDAHIQEIVEKFGLVCVGRVGHDPKGYI---A    |
| 01:9606 135792 NM_001200047 NMNAT3 Homo_sapiens   | AVPELKLLCGADV LKTFQTP----NLWKDAHIQEIVEKFGLVCVGRVGHDPKGYI---A    |
| 01:9606 135792 NM_178177 NMNAT3 Homo_sapiens      | AVPELKLLCGADV LKTFQTP----NLWKDAHIQEIVEKFGLVCVGRVGHDPKGYI---A    |
| 04:9913 135792 NM_001098120 DTWD1 Bos_taurus      | QIPHVKLPLKIDI IKHPNETDGKSTAVHAKLLAPEFVNIYTYPCIP EYEEKDHEVALVFP  |
| 00:1 Ac-ATATGVDVPDKMKSR                           | -----                                                           |
| 01:9606 135792 0#NP_001186976 NMNAT3 Homo_sapiens | ESPILRMHQHNIHLAKEPV-----QNEISATYIRRALGQGQSVKYLI PDAVITYIKD--    |
| 01:9606 135792 0#NP_835471 NMNAT3 Homo_sapiens    | ESPILRMHQHNIHLAKEPV-----QNEISATYIRRALGQGQSVKYLI PDAVITYIKD--    |
| 01:9606 135792 NM_001200047 NMNAT3 Homo_sapiens   | ESPILRMHQHNIHLAKEPV-----QNEISATYIRRALGQGQSVKYLI PDAVITYIKD--    |
| 01:9606 135792 NM_178177 NMNAT3 Homo_sapiens      | ESPILRMHQHNIHLAKEPV-----QNEISATYIRRALGQGQSVKYLI PDAVITYIKD--    |
| 04:9913 135792 NM_001098120 DTWD1 Bos_taurus      | GPKSVSVKDISFHLQKKSQNSIRGKNDDLKPSIKRKKTE-----EPDLNDSKCKD TT      |
| 00:1 Ac-ATATGVDVPDKMKSR                           | -----                                                           |
| 01:9606 135792 0#NP_001186976 NMNAT3 Homo_sapiens | -HGLYTKGSTWKGKSTQSTEGKTS--                                      |
| 01:9606 135792 0#NP_835471 NMNAT3 Homo_sapiens    | -HGLYTKGSTWKGKSTQSTEGKTS--                                      |
| 01:9606 135792 NM_001200047 NMNAT3 Homo_sapiens   | -HGLYTKGSTWKGKSTQSTEGKTS--                                      |
| 01:9606 135792 NM_178177 NMNAT3 Homo_sapiens      | -HGLYTKGSTWKGKSTQSTEGKTS--                                      |
| 04:9913 135792 NM_001098120 DTWD1 Bos_taurus      | LKKIVFIDSTWNQTNKIFTDERLQGK                                      |

***NOP2***

Ac-AALTWSGTWGEGTMGR

CLUSTAL O(1.2.1) multiple sequence alignment

|                                                     |                                                               |
|-----------------------------------------------------|---------------------------------------------------------------|
| 00:1 Ac-AALTWSGTWGEGTMGR                            | -----A-----ALTWSG-TW-----GEGTMG                               |
| 01:9606 135865 0#NP_001028886 NOP2 Homo_sapiens     | -----MG                                                       |
| 01:9606 135865 0#NP_001245237 NOP2 Homo_sapiens     | -----MG                                                       |
| 01:9606 135865 0#NP_001245238 NOP2 Homo_sapiens     | -----MG                                                       |
| 01:9606 135865 0#NP_001245239 NOP2 Homo_sapiens     | -----MG                                                       |
| 01:9606 135865 0#NP_006161 NOP2 Homo_sapiens        | -----MG                                                       |
| 01:9606 135865 NM_001033714 NOP2 Homo_sapiens       | VRIARGGPPEGHSRTLRLVLGLEEIGGR---RVA-----ALTWSG-TW-----GEGTMG   |
| 01:9606 135865 NM_001258308 NOP2 Homo_sapiens       | -----PAFCTMG                                                  |
| 01:9606 135865 NM_001258309 NOP2 Homo_sapiens       | -----PAFCTMG                                                  |
| 01:9606 135865 NM_001258310 NOP2 Homo_sapiens       | -----PAFCTMG                                                  |
| 01:9606 135865 NM_006170 NOP2 Homo_sapiens          | -----PAFCTMG                                                  |
| 04:9913 135865 NM_001102257 NOP2 Bos_taurus         | -----GGSAAARDVSVVWRLISWPSRTWISVPVSSRTMG                       |
| 06:10116 135865 NM_001191785 Nop2 Rattus_norvegicus | -----TLPQVHVERALAGGTGSAG-----TSPRQAEPSVIMG                    |
| 07:10090 135865 NM_138747 Nop2 Mus_musculus         | LR---DSL SRCATSEFFPPVHVERALTGGAGSAG-----TSRRRAEPSVIMG         |
| 10:7955 135865 NM_001301359 nop2 Danio_rerio        | -----VSSMG                                                    |
|                                                     | **                                                            |
| 00:1 Ac-AALTWSGTWGEGTMGR                            | R-----                                                        |
| 01:9606 135865 0#NP_001028886 NOP2 Homo_sapiens     | RKLDPTK-EKRGPGRKARKQKGAETELVRFLPAVSDENSKRLSSRARKRAAKRRLGSVEA  |
| 01:9606 135865 0#NP_001245237 NOP2 Homo_sapiens     | RKLDPTK-EKRGPGRKARKQKGAETELVRFLPAVSDENSKRLSSRARKRAAKRRLGSVEA  |
| 01:9606 135865 0#NP_001245238 NOP2 Homo_sapiens     | RKLDPTK-EKRGPGRKARKQKGAETELVRFLPAVSDENSKRLSSRARKRAAKRRLGSVEA  |
| 01:9606 135865 0#NP_001245239 NOP2 Homo_sapiens     | RKLDPTK-EKRGPGRKARKQKGAETELVRFLPAVSDENSKRLSSRARKRAAKRRLGSVEA  |
| 01:9606 135865 0#NP_006161 NOP2 Homo_sapiens        | RKLDPTK-EKRGPGRKARKQKGAETELVRFLPAVSDENSKRLSSRARKRAAKRRLGSVEA  |
| 01:9606 135865 NM_001033714 NOP2 Homo_sapiens       | RKLDPTK-EKRGPGRKARKQKGAETELVRFLPAVSDENSKRLSSRARKRAAKRRLGSVEA  |
| 01:9606 135865 NM_001258308 NOP2 Homo_sapiens       | RKLDPTK-EKRGPGRKARKQKGAETELVRFLPAVSDENSKRLSSRARKRAAKRRLGSVEA  |
| 01:9606 135865 NM_001258309 NOP2 Homo_sapiens       | RKLDPTK-EKRGPGRKARKQKGAETELVRFLPAVSDENSKRLSSRARKRAAKRRLGSVEA  |
| 01:9606 135865 NM_001258310 NOP2 Homo_sapiens       | RKLDPTK-EKRGPGRKARKQKGAETELVRFLPAVSDENSKRLSSRARKRAAKRRLGSVEA  |
| 01:9606 135865 NM_006170 NOP2 Homo_sapiens          | RKLDPTK-EKRGPGRKARKQKGAETELVRFLPAVSDENSKRLSSRARKRAAKRRLGSVEA  |
| 04:9913 135865 NM_001102257 NOP2 Bos_taurus         | RKLDPTKKEKRGPGRKARKQKGAETELAKFLPAGGDENSKRLSSRARKRAAKRRLGSVEA  |
| 06:10116 135865 NM_001191785 Nop2 Rattus_norvegicus | RKLDPTKKEKRGPGRKARKQKGAETELIRFLPAAGDENFKRLSSRARKRAAKRRSGSVEV  |
| 07:10090 135865 NM_138747 Nop2 Mus_musculus         | RKLDPTKKEKRGPGRKARKQKGAETELVRFLPAAGDENSKRLSSRARKRAAKRRAGSDV   |
| 10:7955 135865 NM_001301359 nop2 Danio_rerio        | RKLDPTIKVKRGPGRKARKQKGAETELSKFLA--DDEGPKKLSRARKRAAKRAQVTNQL   |
|                                                     | *                                                             |
| 00:1 Ac-AALTWSGTWGEGTMGR                            | -----                                                         |
| 01:9606 135865 0#NP_001028886 NOP2 Homo_sapiens     | PKTNKSPEAKPLPGKLPKG---AVQTAGKKGPQSLFNAPRGKKRPAPGSD-EEEEEEEDS  |
| 01:9606 135865 0#NP_001245237 NOP2 Homo_sapiens     | PKTNKSPEAKPLPGKLPKGISAGAVQTAGKKGPQSLFNAPRGKKRPAPGSD-EEEEEEEDS |
| 01:9606 135865 0#NP_001245238 NOP2 Homo_sapiens     | PKTNKSPEAKPLPGKLPKGISAGAVQTAGKKGPQSLFNAPRGKKRPAPGSD-EEEEEEEDS |
| 01:9606 135865 0#NP_001245239 NOP2 Homo_sapiens     | PKTNKSPEAKPLPGKLPKG---AVQTAGKKGPQSLFNAPRGKKRPAPGSD-EEEEEEEDS  |
| 01:9606 135865 0#NP_006161 NOP2 Homo_sapiens        | PKTNKSPEAKPLPGKLPKG---AVQTAGKKGPQSLFNAPRGKKRPAPGSD-EEEEEEEDS  |
| 01:9606 135865 NM_001033714 NOP2 Homo_sapiens       | PKTNKSPEAKPLPGKLPKG---AVQTAGKKGPQSLFNAPRGKKRPAPGSD-EEEEEEEDS  |
| 01:9606 135865 NM_001258308 NOP2 Homo_sapiens       | PKTNKSPEAKPLPGKLPKGISAGAVQTAGKKGPQSLFNAPRGKKRPAPGSD-EEEEEEEDS |
| 01:9606 135865 NM_001258309 NOP2 Homo_sapiens       | PKTNKSPEAKPLPGKLPKGISAGAVQTAGKKGPQSLFNAPRGKKRPAPGSD-EEEEEEEDS |
| 01:9606 135865 NM_001258310 NOP2 Homo_sapiens       | PKTNKSPEAKPLPGKLPKG---AVQTAGKKGPQSLFNAPRGKKRPAPGSD-EEEEEEEDS  |
| 01:9606 135865 NM_006170 NOP2 Homo_sapiens          | PETNKSFGAKPLPGKLPKG---AVQTPGKKEALSLFNIARGKKRPAPTHS-SAEEEEDS   |
| 04:9913 135865 NM_001102257 NOP2 Bos_taurus         | PKPNKSPGIKTLPGELPKG---AVQV-----RGKKRPAPIQNSDGEDEEDS           |
| 06:10116 135865 NM_001191785 Nop2 Rattus_norvegicus | PKPNKSPGIKTLPGELSKG---AVQA-----RGKKRPAPIQNSDGEDEEDS           |
| 07:10090 135865 NM_138747 Nop2 Mus_musculus         | KEPKQEEK--PKKGFSDENKE--WLKPAQRKKRI--EQSEDEEDSDSQWEDDDDDDDDDV  |
| 10:7955 135865 NM_001301359 nop2 Danio_rerio        |                                                               |
| 00:1 Ac-AALTWSGTWGEGTMGR                            | -----                                                         |
| 01:9606 135865 0#NP_001028886 NOP2 Homo_sapiens     | EEDGMVNHGDLWGSSED-DADTVDDYGADSNSEDEEEGEA-----                 |
| 01:9606 135865 0#NP_001245237 NOP2 Homo_sapiens     | EEDGMVNHGDLWGSSED-DADTVDDYGADSNSEDEEEGEA-----                 |
| 01:9606 135865 0#NP_001245238 NOP2 Homo_sapiens     | EEDGMVNHGDLWGSSED-DADTVDDYGADSNSEDEEEGEAAGVQWLGLGSLQPPPPGFKQF |
| 01:9606 135865 0#NP_001245239 NOP2 Homo_sapiens     | EEDGMVNHGDLWGSSED-DADTVDDYGADSNSEDEEEGEA-----                 |
| 01:9606 135865 0#NP_006161 NOP2 Homo_sapiens        | EEDGMVNHGDLWGSSED-DADTVDDYGADSNSEDEEEGEA-----                 |
| 01:9606 135865 NM_001033714 NOP2 Homo_sapiens       | EEDGMVNHGDLWGSSED-DADTVDDYGADSNSEDEEEGEA-----                 |
| 01:9606 135865 NM_001258308 NOP2 Homo_sapiens       | EEDGMVNHGDLWGSSED-DADTVDDYGADSNSEDEEEGEAAGVQWLGLGSLQPPPPGFKQF |
| 01:9606 135865 NM_001258309 NOP2 Homo_sapiens       | EEDGMVNHGDLWGSSED-DADTVDDYGADSNSEDEEEGEA-----                 |
| 01:9606 135865 NM_001258310 NOP2 Homo_sapiens       | EEDGMVNHGDLWGSSED-DADTVDDYGADSNSEDEEEGEA-----                 |
| 01:9606 135865 NM_006170 NOP2 Homo_sapiens          | EEDGMVNHGDLWGSSED-DADTVDDYGADSNSEDEEEGEA-----                 |
| 04:9913 135865 NM_001102257 NOP2 Bos_taurus         | EGDGVVNQEDLWGSSESDAGMIDDYGAGSNSEDEDEDGGE-----                 |
| 06:10116 135865 NM_001191785 Nop2 Rattus_norvegicus | EEEDVVTQGLWGSSESDMVDYGDAD--SEDEEE-----                        |
| 07:10090 135865 NM_138747 Nop2 Mus_musculus         | GEDDVVTQGLWGSSESDMVDYGAASNSEDEEE-----                         |
| 10:7955 135865 NM_001301359 nop2 Danio_rerio        | DNEQTFDHDKIKNEDDDDKMVDYGADEGDEKDSDEGE-----                    |
| 00:1 Ac-AALTWSGTWGEGTMGR                            | -----                                                         |
| 01:9606 135865 0#NP_001028886 NOP2 Homo_sapiens     | -----LLPIERAARKQKAREAAAGIQWSEETE-DEEEEKEVTPESGPPKVEE          |
| 01:9606 135865 0#NP_001245237 NOP2 Homo_sapiens     | -----LLPIERAARKQKAREAAAGIQWSEETE-DEEEEKEVTPESGPPKVEE          |
| 01:9606 135865 0#NP_001245238 NOP2 Homo_sapiens     | SCLSFPSWDLQLLP IERAARKQKAREAAAGIQWSEETE-DEEEEKEVTPESGPPKVEE   |
| 01:9606 135865 0#NP_001245239 NOP2 Homo_sapiens     | -----LLPIERAARKQKAREAAAGIQWSEETE-DEEEEKEVTPESGPPKVEE          |
| 01:9606 135865 0#NP_006161 NOP2 Homo_sapiens        | -----LLPIERAARKQKAREAAAGIQWSEETE-DEEEEKEVTPESGPPKVEE          |
| 01:9606 135865 NM_001033714 NOP2 Homo_sapiens       | -----ALLPIERAARKQKAREAAAGIQWSEETE-DEEEEKEVTPESGPPKVEE         |
| 01:9606 135865 NM_001258308 NOP2 Homo_sapiens       | -----LLPIERAARKQKAREAAAGIQWSEETE-DEEEEKEVTPESGPPKVEE          |
| 01:9606 135865 NM_001258309 NOP2 Homo_sapiens       | SCLSFPSWDLQLLP IERAARKQKAREAAAGIQWSEETE-DEEEEKEVTPESGPPKVEE   |
| 01:9606 135865 NM_001258310 NOP2 Homo_sapiens       | -----LLPIERAARKQKAREAAAGIQWSEETE-DEEEEKEVTPESGPPKVEE          |
| 01:9606 135865 NM_006170 NOP2 Homo_sapiens          | -----LLPIERAARKQKAREAAAGIQWSEETE-DEEEEKEVTPESGPPKVEE          |
| 04:9913 135865 NM_001102257 NOP2 Bos_taurus         | -----ELLPIERAARKQKAQEA VAGDQWSEATD-EEEEEEQVSAESGREDEE         |
| 06:10116 135865 NM_001191785 Nop2 Rattus_norvegicus | -----KLLPIERAALKQKARDPADGTQWSEEDTD-E--DEGVTPESHPRKDDK         |
| 07:10090 135865 NM_138747 Nop2 Mus_musculus         | -----KLLPIERAALKQKQDATAGVLWNEEDTD-EDDDDGVSPESHPRKDDK          |
| 10:7955 135865 NM_001301359 nop2 Danio_rerio        | -----ELLPIEKAARKQKQKTSMKPESDDDDDEEEEEEEDDDYKEEEKDDSEEE        |





```

00:1|Ac-AALTWSGTWGEGTMR|-----
01:9606|135865|0#NP_001028886|NOP2|Homo_sapiens|VSPIRSSRPppAKRKKKSQSRGNSQLLLS----
01:9606|135865|0#NP_001245237|NOP2|Homo_sapiens|VSPIRSSRPppAKRKKKSQSRGNSQLLLS----
01:9606|135865|0#NP_001245238|NOP2|Homo_sapiens|VSPIRSSRPppAKRKKKSQSRGNSQLLLS---
01:9606|135865|0#NP_001245239|NOP2|Homo_sapiens|-----
01:9606|135865|0#NP_006161|NOP2|Homo_sapiens|VSPIRSSRPppAKRKKKSQSRGNSQLLLS----
01:9606|135865|NM_001033714|NOP2|Homo_sapiens|VSPIRSSRPppAKRKKKSQSRGNSQLLLS---
01:9606|135865|NM_001258308|NOP2|Homo_sapiens|VSPIRSSRPppAKRKKKSQSRGNSQLLLS----
01:9606|135865|NM_001258309|NOP2|Homo_sapiens|VSPIRSSRPppAKRKKKSQSRGNSQLLLS---
01:9606|135865|NM_001258310|NOP2|Homo_sapiens|-----
01:9606|135865|NM_006170|NOP2|Homo_sapiens|VSPIRSSRPppAKRKKKSQSRGNSQLLLS----
04:9913|135865|NM_001102257|NOP2|Bos_taurus|MSRSSSPppAKRKKKSQSRGGRPALTSVDG
06:10116|135865|NM_001191785|Nop2|Rattus_norvegicus|TAHHSSTRPPpAKRKKSMTKGSSQPLLS---
07:10090|135865|NM_138747|Nop2|Mus_musculus|VPHSSSTRPPpAKRKKSMTKGNSQPLLS---
10:7955|135865|NM_001301359|nop2|Danio_erio|---QESGQ-----

```

*RANBP2*

Ac-ATAAGLSAGLTR

CLUSTAL O(1.2.1) multiple sequence alignment

|                                                |                                                               |
|------------------------------------------------|---------------------------------------------------------------|
| 00:1 Ac-ATAAGLSAGLTR                           | -----ATAAGLSAGLTR-----                                        |
| 01:9606 136803 0#NP_006258 RANBP2 Homo_sapiens | -----MRRSKADVERYIASVQGS                                       |
| 01:9606 136803 NM_006267 RANBP2 Homo_sapiens   | HSGPPPATALRHWFAGAFLLLEVATAAGLSAGLTRLGSGVGAMRRSKADVERYIASVQGS  |
| 00:1 Ac-ATAAGLSAGLTR                           | -----                                                         |
| 01:9606 136803 0#NP_006258 RANBP2 Homo_sapiens | TPSPRQKSMKGFYFAKLYEAKKEYDLAKKYICTYINVQERDPKAHRFLGLLYELEENTDK  |
| 01:9606 136803 NM_006267 RANBP2 Homo_sapiens   | TPSPRQKSMKGFYFAKLYEAKKEYDLAKKYICTYINVQERDPKAHRFLGLLYELEENTDK  |
| 00:1 Ac-ATAAGLSAGLTR                           | -----                                                         |
| 01:9606 136803 0#NP_006258 RANBP2 Homo_sapiens | AVECYRRSVELNPTQKDLVLKIAELLCKNDVTDGRAKYWLERAAKLPFGSPAIYKLKEQL  |
| 01:9606 136803 NM_006267 RANBP2 Homo_sapiens   | AVECYRRSVELNPTQKDLVLKIAELLCKNDVTDGRAKYWLERAAKLPFGSPAIYKLKEQL  |
| 00:1 Ac-ATAAGLSAGLTR                           | -----                                                         |
| 01:9606 136803 0#NP_006258 RANBP2 Homo_sapiens | LDCEGEDGWNKLFDLIQSELYVRPDDVHVNIRLVEVYRSTKRLKDAVAHCHAEARNIALR  |
| 01:9606 136803 NM_006267 RANBP2 Homo_sapiens   | LDCEGEDGWNKLFDLIQSELYVRPDDVHVNIRLVEVYRSTKRLKDAVAHCHAEARNIALR  |
| 00:1 Ac-ATAAGLSAGLTR                           | -----                                                         |
| 01:9606 136803 0#NP_006258 RANBP2 Homo_sapiens | SSLEWNSCVVQTLKEYLESQCLESDKSDWRATNTDLLLAYANMLLTLSTRDVQESREL    |
| 01:9606 136803 NM_006267 RANBP2 Homo_sapiens   | SSLEWNSCVVQTLKEYLESQCLESDKSDWRATNTDLLLAYANMLLTLSTRDVQESREL    |
| 00:1 Ac-ATAAGLSAGLTR                           | -----                                                         |
| 01:9606 136803 0#NP_006258 RANBP2 Homo_sapiens | LQSFDSALQSVKSLGGNDELSATFLEMKGHFYMHAGSLLKMGQHSSNVQWRALSELAAL   |
| 01:9606 136803 NM_006267 RANBP2 Homo_sapiens   | LQSFDSALQSVKSLGGNDELSATFLEMKGHFYMHAGSLLKMGQHSSNVQWRALSELAAL   |
| 00:1 Ac-ATAAGLSAGLTR                           | -----                                                         |
| 01:9606 136803 0#NP_006258 RANBP2 Homo_sapiens | CYLIAFQVPRPKIKLIKGEAGQNLEMMACDRLSQSGHMLLNLSRGKQDFLKEIVETFAN   |
| 01:9606 136803 NM_006267 RANBP2 Homo_sapiens   | CYLIAFQVPRPKIKLIKGEAGQNLEMMACDRLSQSGHMLLNLSRGKQDFLKEIVETFAN   |
| 00:1 Ac-ATAAGLSAGLTR                           | -----                                                         |
| 01:9606 136803 0#NP_006258 RANBP2 Homo_sapiens | KSGQSALYDALFSSQSPKDTSFGLSDDIGNIDVREPELEDLTRYDVGAIRAHNGSLQHLT  |
| 01:9606 136803 NM_006267 RANBP2 Homo_sapiens   | KSGQSALYDALFSSQSPKDTSFGLSDDIGNIDVREPELEDLTRYDVGAIRAHNGSLQHLT  |
| 00:1 Ac-ATAAGLSAGLTR                           | -----                                                         |
| 01:9606 136803 0#NP_006258 RANBP2 Homo_sapiens | WLGQLQWNSLPALPGIRKWLKQLFHHLPHETSRLETNAPESICILDLEVFLLGVVYTSHLQ |
| 01:9606 136803 NM_006267 RANBP2 Homo_sapiens   | WLGQLQWNSLPALPGIRKWLKQLFHHLPHETSRLETNAPESICILDLEVFLLGVVYTSHLQ |
| 00:1 Ac-ATAAGLSAGLTR                           | -----                                                         |
| 01:9606 136803 0#NP_006258 RANBP2 Homo_sapiens | LKEKCNSHSSSYQPLCLPLPVCKQLCTERQKSWDAVCTLIHRKAVPGNVAKLRLLVQHE   |
| 01:9606 136803 NM_006267 RANBP2 Homo_sapiens   | LKEKCNSHSSSYQPLCLPLPVCKQLCTERQKSWDAVCTLIHRKAVPGNVAKLRLLVQHE   |
| 00:1 Ac-ATAAGLSAGLTR                           | -----                                                         |
| 01:9606 136803 0#NP_006258 RANBP2 Homo_sapiens | INTLRAQEKHGLQPALLVHWAECQLKTGSGLNSFYDQREYIGRSVHYWKKVLPLLKIIKK  |
| 01:9606 136803 NM_006267 RANBP2 Homo_sapiens   | INTLRAQEKHGLQPALLVHWAECQLKTGSGLNSFYDQREYIGRSVHYWKKVLPLLKIIKK  |
| 00:1 Ac-ATAAGLSAGLTR                           | -----                                                         |
| 01:9606 136803 0#NP_006258 RANBP2 Homo_sapiens | KNSIPEPIDPLFKHFHSVDIQASEIVEYEEDAHITFAILDAVNGNIEDAVTAFESIKSJV  |
| 01:9606 136803 NM_006267 RANBP2 Homo_sapiens   | KNSIPEPIDPLFKHFHSVDIQASEIVEYEEDAHITFAILDAVNGNIEDAVTAFESIKSJV  |
| 00:1 Ac-ATAAGLSAGLTR                           | -----                                                         |
| 01:9606 136803 0#NP_006258 RANBP2 Homo_sapiens | SYWNLALIFHRKAEDIENDALSPEEQECKNYLRKTRDYLIKIIDDSNSLNVVKKLPVP    |
| 01:9606 136803 NM_006267 RANBP2 Homo_sapiens   | SYWNLALIFHRKAEDIENDALSPEEQECKNYLRKTRDYLIKIIDDSNSLNVVKKLPVP    |
| 00:1 Ac-ATAAGLSAGLTR                           | -----                                                         |
| 01:9606 136803 0#NP_006258 RANBP2 Homo_sapiens | LESVKEMLSNSVMQELEDYSEGGLYKNGSLRNADSEIKHSTPSPTRYSLSPSKSYKYSPK  |
| 01:9606 136803 NM_006267 RANBP2 Homo_sapiens   | LESVKEMLSNSVMQELEDYSEGGLYKNGSLRNADSEIKHSTPSPTRYSLSPSKSYKYSPK  |
| 00:1 Ac-ATAAGLSAGLTR                           | -----                                                         |
| 01:9606 136803 0#NP_006258 RANBP2 Homo_sapiens | TPPRWAEDQNSLLKMICQQVEAIKKEMQELKLNSSNSASPHRWPTENYGPDSVPDGYQGS  |
| 01:9606 136803 NM_006267 RANBP2 Homo_sapiens   | TPPRWAEDQNSLLKMICQQVEAIKKEMQELKLNSSNSASPHRWPTENYGPDSVPDGYQGS  |
| 00:1 Ac-ATAAGLSAGLTR                           | -----                                                         |
| 01:9606 136803 0#NP_006258 RANBP2 Homo_sapiens | QTFHGAPLTVATTGPSVYYSQSPAYNSQYLLRPAANVTPTKGPVYGMNRLPPQQHIYAYP  |
| 01:9606 136803 NM_006267 RANBP2 Homo_sapiens   | QTFHGAPLTVATTGPSVYYSQSPAYNSQYLLRPAANVTPTKGPVYGMNRLPPQQHIYAYP  |
| 00:1 Ac-ATAAGLSAGLTR                           | -----                                                         |
| 01:9606 136803 0#NP_006258 RANBP2 Homo_sapiens | QQMHTPPVQSSSACMFSQEMYGPPALRFESPATGILSPRGDDYFNYNVQQTSTNPPLPEP  |
| 01:9606 136803 NM_006267 RANBP2 Homo_sapiens   | QQMHTPPVQSSSACMFSQEMYGPPALRFESPATGILSPRGDDYFNYNVQQTSTNPPLPEP  |

|                                                |                                                                  |
|------------------------------------------------|------------------------------------------------------------------|
| 00:1 Ac-ATAAGLSAGLTR                           | -----                                                            |
| 01:9606 136803 0#NP_006258 RANBP2 Homo_sapiens | GYFTKPPIAAHASRSAESKTIEFGKTNFVQPMPEGELRPSLPTQAHTTQPTPFKFN SNFK    |
| 01:9606 136803 NM_006267 RANBP2 Homo_sapiens   | GYFTKPPIAAHASRSAESKTIEFGKTNFVQPMPEGELRPSLPTQAHTTQPTPFKFN SNFK    |
| 00:1 Ac-ATAAGLSAGLTR                           | -----                                                            |
| 01:9606 136803 0#NP_006258 RANBP2 Homo_sapiens | SNDGDFTFSSPQVVTPPPAAYSNSESLLGLLTS DKPLQGDGYSGAKPIPGGQTIGRNT      |
| 01:9606 136803 NM_006267 RANBP2 Homo_sapiens   | SNDGDFTFSSPQVVTPPPAAYSNSESLLGLLTS DKPLQGDGYSGAKPIPGGQTIGRNT      |
| 00:1 Ac-ATAAGLSAGLTR                           | -----                                                            |
| 01:9606 136803 0#NP_006258 RANBP2 Homo_sapiens | FNFGSKNVSGISFTENMGSSQQKNSGFRRSDDMFTFHGPGKSVFGTPTLETANKNHETDG     |
| 01:9606 136803 NM_006267 RANBP2 Homo_sapiens   | FNFGSKNVSGISFTENMGSSQQKNSGFRRSDDMFTFHGPGKSVFGTPTLETANKNHETDG     |
| 00:1 Ac-ATAAGLSAGLTR                           | -----                                                            |
| 01:9606 136803 0#NP_006258 RANBP2 Homo_sapiens | GSAHGDDDDGGPHFEPVPLPDKIEVKTGEDEEEFFCNRAKLFRFDVESKEWKERGIGN       |
| 01:9606 136803 NM_006267 RANBP2 Homo_sapiens   | GSAHGDDDDGGPHFEPVPLPDKIEVKTGEDEEEFFCNRAKLFRFDVESKEWKERGIGN       |
| 00:1 Ac-ATAAGLSAGLTR                           | -----                                                            |
| 01:9606 136803 0#NP_006258 RANBP2 Homo_sapiens | VKILRHKTSGKIRLLMRREQVLKICANHYSISPD MKLTPNAGSDRSFVWHALDYADELPKP   |
| 01:9606 136803 NM_006267 RANBP2 Homo_sapiens   | VKILRHKTSGKIRLLMRREQVLKICANHYSISPD MKLTPNAGSDRSFVWHALDYADELPKP   |
| 00:1 Ac-ATAAGLSAGLTR                           | -----                                                            |
| 01:9606 136803 0#NP_006258 RANBP2 Homo_sapiens | EQLAIRFKTPEEAALFKCKFEEAQ SILKAPGTNVAMASNQAVRIVKEPTSHDNKDICKSD    |
| 01:9606 136803 NM_006267 RANBP2 Homo_sapiens   | EQLAIRFKTPEEAALFKCKFEEAQ SILKAPGTNVAMASNQAVRIVKEPTSHDNKDICKSD    |
| 00:1 Ac-ATAAGLSAGLTR                           | -----                                                            |
| 01:9606 136803 0#NP_006258 RANBP2 Homo_sapiens | AGNLNFEFQVAKKEGSWWHCNSCSLKNASTAKKCVSCQNLNPSNKELVGPPLAETVFTPK     |
| 01:9606 136803 NM_006267 RANBP2 Homo_sapiens   | AGNLNFEFQVAKKEGSWWHCNSCSLKNASTAKKCVSCQNLNPSNKELVGPPLAETVFTPK     |
| 00:1 Ac-ATAAGLSAGLTR                           | -----                                                            |
| 01:9606 136803 0#NP_006258 RANBP2 Homo_sapiens | TSPENVQDRFALVTPKKEGHWDCSICLVRNEPTVSR CIACQNTKSANKSGSSFVHQASFK    |
| 01:9606 136803 NM_006267 RANBP2 Homo_sapiens   | TSPENVQDRFALVTPKKEGHWDCSICLVRNEPTVSR CIACQNTKSANKSGSSFVHQASFK    |
| 00:1 Ac-ATAAGLSAGLTR                           | -----                                                            |
| 01:9606 136803 0#NP_006258 RANBP2 Homo_sapiens | FGQGDLPKPINSDFRSVFTKEGQWDCSACL VQNEGSSTKCAACQNPRKQSLPATSIPTP     |
| 01:9606 136803 NM_006267 RANBP2 Homo_sapiens   | FGQGDLPKPINSDFRSVFTKEGQWDCSACL VQNEGSSTKCAACQNPRKQSLPATSIPTP     |
| 00:1 Ac-ATAAGLSAGLTR                           | -----                                                            |
| 01:9606 136803 0#NP_006258 RANBP2 Homo_sapiens | ASFKFGTSETSKTLKSGFEDMFAKKEGQWDCSSCLVRNEANATRCVACQNPDKPSPSTSV     |
| 01:9606 136803 NM_006267 RANBP2 Homo_sapiens   | ASFKFGTSETSKTLKSGFEDMFAKKEGQWDCSSCLVRNEANATRCVACQNPDKPSPSTSV     |
| 00:1 Ac-ATAAGLSAGLTR                           | -----                                                            |
| 01:9606 136803 0#NP_006258 RANBP2 Homo_sapiens | PAPASFKFGTSETSKAPKSGFEGMFTKKEGQWDCSVCLVRNEASATKCIACQNP GKQNQTT   |
| 01:9606 136803 NM_006267 RANBP2 Homo_sapiens   | PAPASFKFGTSETSKAPKSGFEGMFTKKEGQWDCSVCLVRNEASATKCIACQNP GKQNQTT   |
| 00:1 Ac-ATAAGLSAGLTR                           | -----                                                            |
| 01:9606 136803 0#NP_006258 RANBP2 Homo_sapiens | TSAVSTPASSETSKAPKSGFEGMFTKKEGQWDCSVCLVRNEASATKCIACQNP GKQNQTT    |
| 01:9606 136803 NM_006267 RANBP2 Homo_sapiens   | TSAVSTPASSETSKAPKSGFEGMFTKKEGQWDCSVCLVRNEASATKCIACQNP GKQNQTT    |
| 00:1 Ac-ATAAGLSAGLTR                           | -----                                                            |
| 01:9606 136803 0#NP_006258 RANBP2 Homo_sapiens | SAVSTPASSETSKAPKSGFEGMFTKKEGQWDCSVCLVRNEASATKCIACQCP SKQNQT TA   |
| 01:9606 136803 NM_006267 RANBP2 Homo_sapiens   | SAVSTPASSETSKAPKSGFEGMFTKKEGQWDCSVCLVRNEASATKCIACQCP SKQNQT TA   |
| 00:1 Ac-ATAAGLSAGLTR                           | -----                                                            |
| 01:9606 136803 0#NP_006258 RANBP2 Homo_sapiens | ISTPASSEISKAPKSGFEGMFIRKGQWDCSVCCVQNESSSLKCVACDASKPTHKPIAEAP     |
| 01:9606 136803 NM_006267 RANBP2 Homo_sapiens   | ISTPASSEISKAPKSGFEGMFIRKGQWDCSVCCVQNESSSLKCVACDASKPTHKPIAEAP     |
| 00:1 Ac-ATAAGLSAGLTR                           | -----                                                            |
| 01:9606 136803 0#NP_006258 RANBP2 Homo_sapiens | SAFTLGSSEMKLHDS SSGSQVGTGFKSNFSEKASKFGNTEQGFKFGHVDQENS PSFMFQGSS |
| 01:9606 136803 NM_006267 RANBP2 Homo_sapiens   | SAFTLGSSEMKLHDS SSGSQVGTGFKSNFSEKASKFGNTEQGFKFGHVDQENS PSFMFQGSS |
| 00:1 Ac-ATAAGLSAGLTR                           | -----                                                            |
| 01:9606 136803 0#NP_006258 RANBP2 Homo_sapiens | NTEFKSTKEGFSIPVSADGFKFGISEPGNQEKKSEKPLENGTGFQAQDISGQKNRGVIF      |
| 01:9606 136803 NM_006267 RANBP2 Homo_sapiens   | NTEFKSTKEGFSIPVSADGFKFGISEPGNQEKKSEKPLENGTGFQAQDISGQKNRGVIF      |
| 00:1 Ac-ATAAGLSAGLTR                           | -----                                                            |
| 01:9606 136803 0#NP_006258 RANBP2 Homo_sapiens | GQTSSTFTFADLAKSTSGEGFQFGKKDPNFKGFSGAGEKLFSSQY GKMANKANTSGDFEK    |
| 01:9606 136803 NM_006267 RANBP2 Homo_sapiens   | GQTSSTFTFADLAKSTSGEGFQFGKKDPNFKGFSGAGEKLFSSQY GKMANKANTSGDFEK    |

|                                                |                                                                 |
|------------------------------------------------|-----------------------------------------------------------------|
| 00:1 Ac-ATAAGLSAGLTR                           | -----                                                           |
| 01:9606 136803 0#NP_006258 RANBP2 Homo_sapiens | DDDAYKTEDSDDIHFEPVVQMPEKVELVTGEEDEKVLYSQRVKLFRFDAEVSQWKERGLG    |
| 01:9606 136803 NM_006267 RANBP2 Homo_sapiens   | DDDAYKTEDSDDIHFEPVVQMPEKVELVTGEEDEKVLYSQRVKLFRFDAEVSQWKERGLG    |
| 00:1 Ac-ATAAGLSAGLTR                           | -----                                                           |
| 01:9606 136803 0#NP_006258 RANBP2 Homo_sapiens | NLKILKNEVNGKLRMLMRREQVLKVCANHWITTTMNLKPLSGSDRAWMWLASDFS DGDGAK  |
| 01:9606 136803 NM_006267 RANBP2 Homo_sapiens   | NLKILKNEVNGKLRMLMRREQVLKVCANHWITTTMNLKPLSGSDRAWMWLASDFS DGDGAK  |
| 00:1 Ac-ATAAGLSAGLTR                           | -----                                                           |
| 01:9606 136803 0#NP_006258 RANBP2 Homo_sapiens | LEQLAAKFKTPELAEFEFKQKFEECQRLLLDIPLQTPHKLVDTGRAAKLIQRAEEMKSGLK   |
| 01:9606 136803 NM_006267 RANBP2 Homo_sapiens   | LEQLAAKFKTPELAEFEFKQKFEECQRLLLDIPLQTPHKLVDTGRAAKLIQRAEEMKSGLK   |
| 00:1 Ac-ATAAGLSAGLTR                           | -----                                                           |
| 01:9606 136803 0#NP_006258 RANBP2 Homo_sapiens | DFKTFLTNDQTKVTEENKSGSGTGAAGASDTTIKPNPENTGPTLEWDNYDLREDALDDSV    |
| 01:9606 136803 NM_006267 RANBP2 Homo_sapiens   | DFKTFLTNDQTKVTEENKSGSGTGAAGASDTTIKPNPENTGPTLEWDNYDLREDALDDSV    |
| 00:1 Ac-ATAAGLSAGLTR                           | -----                                                           |
| 01:9606 136803 0#NP_006258 RANBP2 Homo_sapiens | SSSSVHASPLASSPVRKNLFRFGESTTGFNFSFKSALSPKSPAKLNQSGTSVGTDEESD     |
| 01:9606 136803 NM_006267 RANBP2 Homo_sapiens   | SSSSVHASPLASSPVRKNLFRFGESTTGFNFSFKSALSPKSPAKLNQSGTSVGTDEESD     |
| 00:1 Ac-ATAAGLSAGLTR                           | -----                                                           |
| 01:9606 136803 0#NP_006258 RANBP2 Homo_sapiens | VTQEEERDQGYFEPVPLPDLLEVSSGEEENEQVVFSHRAKLYRYDKDVGQWKERGIGDIK    |
| 01:9606 136803 NM_006267 RANBP2 Homo_sapiens   | VTQEEERDQGYFEPVPLPDLLEVSSGEEENEQVVFSHRAKLYRYDKDVGQWKERGIGDIK    |
| 00:1 Ac-ATAAGLSAGLTR                           | -----                                                           |
| 01:9606 136803 0#NP_006258 RANBP2 Homo_sapiens | ILQNYDNKQVRIVMRRDQVLKLCANHRITPDMTLQNMKGTERVWLWTACDFADGERKVEH    |
| 01:9606 136803 NM_006267 RANBP2 Homo_sapiens   | ILQNYDNKQVRIVMRRDQVLKLCANHRITPDMTLQNMKGTERVWLWTACDFADGERKVEH    |
| 00:1 Ac-ATAAGLSAGLTR                           | -----                                                           |
| 01:9606 136803 0#NP_006258 RANBP2 Homo_sapiens | LAVRFKLQDVADSFKKIFDEAKTAQEKDSLITPHVSRSSSTPRESPCGKI AVAVLEETTRE  |
| 01:9606 136803 NM_006267 RANBP2 Homo_sapiens   | LAVRFKLQDVADSFKKIFDEAKTAQEKDSLITPHVSRSSSTPRESPCGKI AVAVLEETTRE  |
| 00:1 Ac-ATAAGLSAGLTR                           | -----                                                           |
| 01:9606 136803 0#NP_006258 RANBP2 Homo_sapiens | RTDVIQGGDDVADATSEVEVSSTSETTPKAVVSPPKFVFGSESVKSIF SSEKSKPFAFGNS  |
| 01:9606 136803 NM_006267 RANBP2 Homo_sapiens   | RTDVIQGGDDVADATSEVEVSSTSETTPKAVVSPPKFVFGSESVKSIF SSEKSKPFAFGNS  |
| 00:1 Ac-ATAAGLSAGLTR                           | -----                                                           |
| 01:9606 136803 0#NP_006258 RANBP2 Homo_sapiens | SATGSLFGFSFNAPLKSNNSETSSVAQSGSESKVEPKKCELSKNSDIEQSSDSKVKNLFA    |
| 01:9606 136803 NM_006267 RANBP2 Homo_sapiens   | SATGSLFGFSFNAPLKSNNSETSSVAQSGSESKVEPKKCELSKNSDIEQSSDSKVKNLFA    |
| 00:1 Ac-ATAAGLSAGLTR                           | -----                                                           |
| 01:9606 136803 0#NP_006258 RANBP2 Homo_sapiens | SFPTTEESSINYTFKTPEKAKEKKKPEDSPSDDDLIVYELTPTAEQKALATKLKLPPTTF    |
| 01:9606 136803 NM_006267 RANBP2 Homo_sapiens   | SFPTTEESSINYTFKTPEKAKEKKKPEDSPSDDDLIVYELTPTAEQKALATKLKLPPTTF    |
| 00:1 Ac-ATAAGLSAGLTR                           | -----                                                           |
| 01:9606 136803 0#NP_006258 RANBP2 Homo_sapiens | CYKNRPDYVSEEEEDDED FETAVKKLNGKLYLDGSEKCRPLEENTADNEKECIIVWEKKP   |
| 01:9606 136803 NM_006267 RANBP2 Homo_sapiens   | CYKNRPDYVSEEEEDDED FETAVKKLNGKLYLDGSEKCRPLEENTADNEKECIIVWEKKP   |
| 00:1 Ac-ATAAGLSAGLTR                           | -----                                                           |
| 01:9606 136803 0#NP_006258 RANBP2 Homo_sapiens | TVEEKAKADTLKLPPTFFCGVCSDTDEDNGNGEDFQSELQKVQEAQKSQT EEITSTTDSV   |
| 01:9606 136803 NM_006267 RANBP2 Homo_sapiens   | TVEEKAKADTLKLPPTFFCGVCSDTDEDNGNGEDFQSELQKVQEAQKSQT EEITSTTDSV   |
| 00:1 Ac-ATAAGLSAGLTR                           | -----                                                           |
| 01:9606 136803 0#NP_006258 RANBP2 Homo_sapiens | YTGTEVMVPSFCKSEEPDSITKSISSPSVSSETMDKPVDLSTRKEIDT DSTSQGESKIV    |
| 01:9606 136803 NM_006267 RANBP2 Homo_sapiens   | YTGTEVMVPSFCKSEEPDSITKSISSPSVSSETMDKPVDLSTRKEIDT DSTSQGESKIV    |
| 00:1 Ac-ATAAGLSAGLTR                           | -----                                                           |
| 01:9606 136803 0#NP_006258 RANBP2 Homo_sapiens | SFGFGSSSTGLSFADLASSNSGDFAFGSKDKNFQWANTGA AVFGTQSVGTQSAGKVG EDED |
| 01:9606 136803 NM_006267 RANBP2 Homo_sapiens   | SFGFGSSSTGLSFADLASSNSGDFAFGSKDKNFQWANTGA AVFGTQSVGTQSAGKVG EDED |
| 00:1 Ac-ATAAGLSAGLTR                           | -----                                                           |
| 01:9606 136803 0#NP_006258 RANBP2 Homo_sapiens | GSDEEVVHNEDIHFEPIVSLPEVEVKSGEED EEIFKERAKLYRWDRDVSQWKERGVGDI    |
| 01:9606 136803 NM_006267 RANBP2 Homo_sapiens   | GSDEEVVHNEDIHFEPIVSLPEVEVKSGEED EEIFKERAKLYRWDRDVSQWKERGVGDI    |
| 00:1 Ac-ATAAGLSAGLTR                           | -----                                                           |
| 01:9606 136803 0#NP_006258 RANBP2 Homo_sapiens | KILWHTMKNYRILMRRDQVFKVCANHVITKTMELKPLNVSNNALVW TASDYADGEAKVE    |
| 01:9606 136803 NM_006267 RANBP2 Homo_sapiens   | KILWHTMKNYRILMRRDQVFKVCANHVITKTMELKPLNVSNNALVW TASDYADGEAKVE    |

|                                                        |                                                              |
|--------------------------------------------------------|--------------------------------------------------------------|
| 00:1   Ac-ATAAGLSAGLTR                                 | -----                                                        |
| 01:9606   136803   0#NP_006258   RANBP2   Homo_sapiens | QLAVRFKTKEVADCFKKTFEECQQNLMKLQKGHVSLAAELSKETNPVVFFDVCADGEPLG |
| 01:9606   136803   NM_006267   RANBP2   Homo_sapiens   | QLAVRFKTKEVADCFKKTFEECQQNLMKLQKGHVSLAAELSKETNPVVFFDVCADGEPLG |
| 00:1   Ac-ATAAGLSAGLTR                                 | -----                                                        |
| 01:9606   136803   0#NP_006258   RANBP2   Homo_sapiens | RITMELFSNIVPRTAENFRALCTGEKGFGFKNSIFHRVIPDFVCQGGDITKHDGTGGQSI |
| 01:9606   136803   NM_006267   RANBP2   Homo_sapiens   | RITMELFSNIVPRTAENFRALCTGEKGFGFKNSIFHRVIPDFVCQGGDITKHDGTGGQSI |
| 00:1   Ac-ATAAGLSAGLTR                                 | -----                                                        |
| 01:9606   136803   0#NP_006258   RANBP2   Homo_sapiens | YGDKFEDENFDVKHTGPGLLSMANQGQNTNNSQFVITLKKAEHLDFKHVVFGFVKDGMdT |
| 01:9606   136803   NM_006267   RANBP2   Homo_sapiens   | YGDKFEDENFDVKHTGPGLLSMANQGQNTNNSQFVITLKKAEHLDFKHVVFGFVKDGMdT |
| 00:1   Ac-ATAAGLSAGLTR                                 | -----                                                        |
| 01:9606   136803   0#NP_006258   RANBP2   Homo_sapiens | VKKIESFGSPKGSVCRRITITECGQI                                   |
| 01:9606   136803   NM_006267   RANBP2   Homo_sapiens   | VKKIESFGSPKGSVCRRITITECGQI                                   |

***MYLK***

Ac-SIFQKTGNAVR

CLUSTAL O(1.2.1) multiple sequence alignment

00:1|Ac-SIFQKTGNAVR  
01:9606|14202|0#NP\_444253|MYLK|Homo\_sapiens  
01:9606|14202|0#NP\_444254|MYLK|Homo\_sapiens  
01:9606|14202|0#NP\_444255|MYLK|Homo\_sapiens  
01:9606|14202|0#NP\_444256|MYLK|Homo\_sapiens  
01:9606|14202|0#NP\_444259|MYLK|Homo\_sapiens  
01:9606|14202|0#NP\_444260|MYLK|Homo\_sapiens  
01:9606|14202|NM\_005965|MYLK|Homo\_sapiens  
01:9606|14202|NM\_053025|MYLK|Homo\_sapiens  
01:9606|14202|NM\_053026|MYLK|Homo\_sapiens  
01:9606|14202|NM\_053027|MYLK|Homo\_sapiens  
01:9606|14202|NM\_053028|MYLK|Homo\_sapiens  
01:9606|14202|NM\_053029|MYLK|Homo\_sapiens  
01:9606|14202|NM\_053030|MYLK|Homo\_sapiens  
01:9606|14202|NM\_053031|MYLK|Homo\_sapiens  
01:9606|14202|NM\_053032|MYLK|Homo\_sapiens  
06:10116|14202|NM\_001105874|MyLk|Rattus\_norvegicus  
07:10090|14202|NM\_139300|MyLk|Mus\_musculus  
08:9031|14202|NM\_205459|MYLK|Gallus\_gallus

-----  
-----MGDVKLVASSH  
-----MGDVKLVASSH  
-----MGDVKLVASSH  
-----MGDVKLVASSH  
-----  
-----  
REKIKVAPGCLCCSSEQLQELPSRELQDAFPVP--LAQLPQQTTEKTVTMGDVKLVASSH  
REKIKVAPGCLCCSSEQLQELPSRELQDAFPVP--LAQLPQQTTEKTVTMGDVKLVASSH  
REKIKVAPGCLCCSSEQLQELPSRELQDAFPVP--LAQLPQQTTEKTVTMGDVKLVASSH  
REKIKVAPGCLCCSSEQLQELPSRELQDAFPVP--LAQLPQQTTEKTVTMGDVKLVASSH  
REKIKVAPGCLCCSSEQLQELPSRELQDAFPVP--LAQLPQQTTEKTVTMGDVKLVASSH  
-----  
-----  
-----CASMPGQ--LPGKTMGDVKLVASSH  
-----RGELVSLP-----GFPREPLCESM--SGQLPGKTMGDVKLVASSH  
-----MGDVKLVTSTR

00:1|Ac-SIFQKTGNAVR  
01:9606|14202|0#NP\_444253|MYLK|Homo\_sapiens  
01:9606|14202|0#NP\_444254|MYLK|Homo\_sapiens  
01:9606|14202|0#NP\_444255|MYLK|Homo\_sapiens  
01:9606|14202|0#NP\_444256|MYLK|Homo\_sapiens  
01:9606|14202|0#NP\_444259|MYLK|Homo\_sapiens  
01:9606|14202|0#NP\_444260|MYLK|Homo\_sapiens  
01:9606|14202|NM\_005965|MYLK|Homo\_sapiens  
01:9606|14202|NM\_053025|MYLK|Homo\_sapiens  
01:9606|14202|NM\_053026|MYLK|Homo\_sapiens  
01:9606|14202|NM\_053027|MYLK|Homo\_sapiens  
01:9606|14202|NM\_053028|MYLK|Homo\_sapiens  
01:9606|14202|NM\_053029|MYLK|Homo\_sapiens  
01:9606|14202|NM\_053030|MYLK|Homo\_sapiens  
01:9606|14202|NM\_053031|MYLK|Homo\_sapiens  
01:9606|14202|NM\_053032|MYLK|Homo\_sapiens  
06:10116|14202|NM\_001105874|MyLk|Rattus\_norvegicus  
07:10090|14202|NM\_139300|MyLk|Mus\_musculus  
08:9031|14202|NM\_205459|MYLK|Gallus\_gallus

-----  
ISKTSLSVDPSRVDSMPLTEAPAFILPPRNLCIKEGATAKFEGRVRGYPEPQVTTWHRNGQ  
ISKTSLSVDPSRVDSMPLTEAPAFILPPRNLCIKEGATAKFEGRVRGYPEPQVTTWHRNGQ  
ISKTSLSVDPSRVDSMPLTEAPAFILPPRNLCIKEGATAKFEGRVRGYPEPQVTTWHRNGQ  
ISKTSLSVDPSRVDSMPLTEAPAFILPPRNLCIKEGATAKFEGRVRGYPEPQVTTWHRNGQ  
-----  
-----  
ISKTSLSVDPSRVDSMPLTEAPAFILPPRNLCIKEGATAKFEGRVRGYPEPQVTTWHRNGQ  
ISKTSLSVDPSRVDSMPLTEAPAFILPPRNLCIKEGATAKFEGRVRGYPEPQVTTWHRNGQ  
ISKTSLSVDPSRVDSMPLTEAPAFILPPRNLCIKEGATAKFEGRVRGYPEPQVTTWHRNGQ  
ISKTSLSVDPSRVDSMPLTEAPAFILPPRNLCIKEGATAKFEGRVRGYPEPQVTTWHRNGQ  
ISKTSLSVDPSRVDSMPLTEAPAFILPPRNLCIKEGATAKFEGRVRGYPEPQVTTWHRNGQ  
-----  
-----  
MSKTSHSVDPDSRVSSPLTEAPAFILPPRNLCVKEGATAKFEGRVRGHPEPQVTTWHRNGQ  
MSKTSHSVDPDSKVSMSPLTEAPAFILPPRNLCVKEGATAKFEGRVRGYPEPQVTTWHRNGQ  
VSKTSLTLSPSV-----PAEAPAFITLPPRNIRVQLGATAREFEGKVRGYPEPQITWYRNGH

00:1|Ac-SIFQKTGNAVR  
01:9606|14202|0#NP\_444253|MYLK|Homo\_sapiens  
01:9606|14202|0#NP\_444254|MYLK|Homo\_sapiens  
01:9606|14202|0#NP\_444255|MYLK|Homo\_sapiens  
01:9606|14202|0#NP\_444256|MYLK|Homo\_sapiens  
01:9606|14202|0#NP\_444259|MYLK|Homo\_sapiens  
01:9606|14202|0#NP\_444260|MYLK|Homo\_sapiens  
01:9606|14202|NM\_005965|MYLK|Homo\_sapiens  
01:9606|14202|NM\_053025|MYLK|Homo\_sapiens  
01:9606|14202|NM\_053026|MYLK|Homo\_sapiens  
01:9606|14202|NM\_053027|MYLK|Homo\_sapiens  
01:9606|14202|NM\_053028|MYLK|Homo\_sapiens  
01:9606|14202|NM\_053029|MYLK|Homo\_sapiens  
01:9606|14202|NM\_053030|MYLK|Homo\_sapiens  
01:9606|14202|NM\_053031|MYLK|Homo\_sapiens  
01:9606|14202|NM\_053032|MYLK|Homo\_sapiens  
06:10116|14202|NM\_001105874|MyLk|Rattus\_norvegicus  
07:10090|14202|NM\_139300|MyLk|Mus\_musculus  
08:9031|14202|NM\_205459|MYLK|Gallus\_gallus

-----  
PITSGGRFLDCGIRGTFSLVIHAVHEEDRGKYTCPEATNGSGARQVTVELTVEGSFAKQL  
PITSGGRFLDCGIRGTFSLVIHAVHEEDRGKYTCPEATNGSGARQVTVELTVEGSFAKQL  
PITSGGRFLDCGIRGTFSLVIHAVHEEDRGKYTCPEATNGSGARQVTVELTVEGSFAKQL  
PITSGGRFLDCGIRGTFSLVIHAVHEEDRGKYTCPEATNGSGARQVTVELTVEGSFAKQL  
-----  
-----  
PITSGGRFLDCGIRGTFSLVIHAVHEEDRGKYTCPEATNGSGARQVTVELTVEGSFAKQL  
PITSGGRFLDCGIRGTFSLVIHAVHEEDRGKYTCPEATNGSGARQVTVELTVEGSFAKQL  
PITSGGRFLDCGIRGTFSLVIHAVHEEDRGKYTCPEATNGSGARQVTVELTVEGSFAKQL  
PITSGGRFLDCGIRGTFSLVIHAVHEEDRGKYTCPEATNGSGARQVTVELTVEGSFAKQL  
-----  
-----  
TITNGGRFLLDGGVGRGTFSLVIRGVREEDKGKYTCESNNGSGARQVTVELTVEGDLMKKH  
AITNGGRFLDCGVRGTFSLVIHTVREEDKGKYTCESNNGSGARQVTVELTVEGNSMKKR  
PLPEGDHVYVDHSIRGIFSLVKGVGQEGDSGKYTCESNNGSGARQVTVELTVEGNSLKKY

00:1|Ac-SIFQKTGNAVR  
01:9606|14202|0#NP\_444253|MYLK|Homo\_sapiens  
01:9606|14202|0#NP\_444254|MYLK|Homo\_sapiens  
01:9606|14202|0#NP\_444255|MYLK|Homo\_sapiens  
01:9606|14202|0#NP\_444256|MYLK|Homo\_sapiens  
01:9606|14202|0#NP\_444259|MYLK|Homo\_sapiens  
01:9606|14202|0#NP\_444260|MYLK|Homo\_sapiens  
01:9606|14202|NM\_005965|MYLK|Homo\_sapiens  
01:9606|14202|NM\_053025|MYLK|Homo\_sapiens  
01:9606|14202|NM\_053026|MYLK|Homo\_sapiens  
01:9606|14202|NM\_053027|MYLK|Homo\_sapiens  
01:9606|14202|NM\_053028|MYLK|Homo\_sapiens  
01:9606|14202|NM\_053029|MYLK|Homo\_sapiens  
01:9606|14202|NM\_053030|MYLK|Homo\_sapiens  
01:9606|14202|NM\_053031|MYLK|Homo\_sapiens  
01:9606|14202|NM\_053032|MYLK|Homo\_sapiens  
06:10116|14202|NM\_001105874|MyLk|Rattus\_norvegicus  
07:10090|14202|NM\_139300|MyLk|Mus\_musculus  
08:9031|14202|NM\_205459|MYLK|Gallus\_gallus

-----  
GQPVVSKTLGDRFSAPAVETRPSIWGECPPKFATKLGRVVVKEGQMGRFSCKITGRPPQQ  
GQPVVSKTLGDRFSAPAVETRPSIWGECPPKFATKLGRVVVKEGQMGRFSCKITGRPPQQ  
GQPVVSKTLGDRFSAPAVETRPSIWGECPPKFATKLGRVVVKEGQMGRFSCKITGRPPQQ  
GQPVVSKTLGDRFSAPAVETRPSIWGECPPKFATKLGRVVVKEGQMGRFSCKITGRPPQQ  
-----  
-----  
GQPVVSKTLGDRFSAPAVETRPSIWGECPPKFATKLGRVVVKEGQMGRFSCKITGRPPQQ  
GQPVVSKTLGDRFSAPAVETRPSIWGECPPKFATKLGRVVVKEGQMGRFSCKITGRPPQQ  
GQPVVSKTLGDRFSAPAVETRPSIWGECPPKFATKLGRVVVKEGQMGRFSCKITGRPPQQ  
GQPVVSKTLGDRFSAPAVETRPSIWGECPPKFATKLGRVVVKEGQMGRFSCKITGRPPQQ  
-----  
-----  
GQPVLKASG-----FPGETRPSIWGECPPKFATKLGRAVVKEGQMGRFSCKITGRPPQQ  
DQPVLSKASG-----FPGETRPSIWGECPPKFATKLGRAVVKEGQMGRFSCKITGRPPQQ  
SLPSSARTPGGRLSPVPPVEHRPSIWGESPPKFATKPNRVVREGQTGRFSCKITGRPPQQ



01:9606|14202|0#NP\_444253|MYLK|Homo\_sapiens  
01:9606|14202|0#NP\_444254|MYLK|Homo\_sapiens  
01:9606|14202|0#NP\_444255|MYLK|Homo\_sapiens  
01:9606|14202|0#NP\_444256|MYLK|Homo\_sapiens  
01:9606|14202|0#NP\_444259|MYLK|Homo\_sapiens  
01:9606|14202|0#NP\_444260|MYLK|Homo\_sapiens  
01:9606|14202|NM\_005965|MYLK|Homo\_sapiens  
01:9606|14202|NM\_053025|MYLK|Homo\_sapiens  
01:9606|14202|NM\_053026|MYLK|Homo\_sapiens  
01:9606|14202|NM\_053027|MYLK|Homo\_sapiens  
01:9606|14202|NM\_053028|MYLK|Homo\_sapiens  
01:9606|14202|NM\_053029|MYLK|Homo\_sapiens  
01:9606|14202|NM\_053030|MYLK|Homo\_sapiens  
01:9606|14202|NM\_053031|MYLK|Homo\_sapiens  
01:9606|14202|NM\_053032|MYLK|Homo\_sapiens  
06:10116|14202|NM\_001105874|MyLk|Rattus\_norvegicus  
07:10090|14202|NM\_139300|MyLk|Mus\_musculus  
08:9031|14202|NM\_205459|MYLK|Gallus\_gallus

00:1|Ac-SIFQKTGNAVR

01:9606|14202|0#NP\_444253|MYLK|Homo\_sapiens  
01:9606|14202|0#NP\_444254|MYLK|Homo\_sapiens  
01:9606|14202|0#NP\_444255|MYLK|Homo\_sapiens  
01:9606|14202|0#NP\_444256|MYLK|Homo\_sapiens  
01:9606|14202|0#NP\_444259|MYLK|Homo\_sapiens  
01:9606|14202|0#NP\_444260|MYLK|Homo\_sapiens  
01:9606|14202|NM\_005965|MYLK|Homo\_sapiens  
01:9606|14202|NM\_053025|MYLK|Homo\_sapiens  
01:9606|14202|NM\_053026|MYLK|Homo\_sapiens  
01:9606|14202|NM\_053027|MYLK|Homo\_sapiens  
01:9606|14202|NM\_053028|MYLK|Homo\_sapiens  
01:9606|14202|NM\_053029|MYLK|Homo\_sapiens  
01:9606|14202|NM\_053030|MYLK|Homo\_sapiens  
01:9606|14202|NM\_053031|MYLK|Homo\_sapiens  
01:9606|14202|NM\_053032|MYLK|Homo\_sapiens  
06:10116|14202|NM\_001105874|MyLk|Rattus\_norvegicus  
07:10090|14202|NM\_139300|MyLk|Mus\_musculus  
08:9031|14202|NM\_205459|MYLK|Gallus\_gallus

00:1|Ac-SIFQKTGNAVR

01:9606|14202|0#NP\_444253|MYLK|Homo\_sapiens  
01:9606|14202|0#NP\_444254|MYLK|Homo\_sapiens  
01:9606|14202|0#NP\_444255|MYLK|Homo\_sapiens  
01:9606|14202|0#NP\_444256|MYLK|Homo\_sapiens  
01:9606|14202|0#NP\_444259|MYLK|Homo\_sapiens  
01:9606|14202|0#NP\_444260|MYLK|Homo\_sapiens  
01:9606|14202|NM\_005965|MYLK|Homo\_sapiens  
01:9606|14202|NM\_053025|MYLK|Homo\_sapiens  
01:9606|14202|NM\_053026|MYLK|Homo\_sapiens  
01:9606|14202|NM\_053027|MYLK|Homo\_sapiens  
01:9606|14202|NM\_053028|MYLK|Homo\_sapiens  
01:9606|14202|NM\_053029|MYLK|Homo\_sapiens  
01:9606|14202|NM\_053030|MYLK|Homo\_sapiens  
01:9606|14202|NM\_053031|MYLK|Homo\_sapiens  
01:9606|14202|NM\_053032|MYLK|Homo\_sapiens  
06:10116|14202|NM\_001105874|MyLk|Rattus\_norvegicus  
07:10090|14202|NM\_139300|MyLk|Mus\_musculus  
08:9031|14202|NM\_205459|MYLK|Gallus\_gallus

00:1|Ac-SIFQKTGNAVR

01:9606|14202|0#NP\_444253|MYLK|Homo\_sapiens  
01:9606|14202|0#NP\_444254|MYLK|Homo\_sapiens  
01:9606|14202|0#NP\_444255|MYLK|Homo\_sapiens  
01:9606|14202|0#NP\_444256|MYLK|Homo\_sapiens  
01:9606|14202|0#NP\_444259|MYLK|Homo\_sapiens  
01:9606|14202|0#NP\_444260|MYLK|Homo\_sapiens  
01:9606|14202|NM\_005965|MYLK|Homo\_sapiens  
01:9606|14202|NM\_053025|MYLK|Homo\_sapiens  
01:9606|14202|NM\_053026|MYLK|Homo\_sapiens  
01:9606|14202|NM\_053027|MYLK|Homo\_sapiens  
01:9606|14202|NM\_053028|MYLK|Homo\_sapiens  
01:9606|14202|NM\_053029|MYLK|Homo\_sapiens  
01:9606|14202|NM\_053030|MYLK|Homo\_sapiens  
01:9606|14202|NM\_053031|MYLK|Homo\_sapiens  
01:9606|14202|NM\_053032|MYLK|Homo\_sapiens  
06:10116|14202|NM\_001105874|MyLk|Rattus\_norvegicus  
07:10090|14202|NM\_139300|MyLk|Mus\_musculus  
08:9031|14202|NM\_205459|MYLK|Gallus\_gallus

00:1|Ac-SIFQKTGNAVR

01:9606|14202|0#NP\_444253|MYLK|Homo\_sapiens  
01:9606|14202|0#NP\_444254|MYLK|Homo\_sapiens

AFPKFESKPPQSQEVKENQTVKFRCEVSGIPKPEVAWFLEGTpvrrQEGSIEVYEDAGSHY  
AFPKFESKPPQSQEVKENQTVKFRCE-----  
AFPKFESKPPQSQEVKENQTVKFRCEVSGIPKPEVAWFLEGTpvrrQEGSIEVYEDAGSHY  
AFPKFESKPPQSQEVKENQTVKFRCE-----  
-----  
-----  
-----  
AFPKFESKPPQSQEVKENQTVKFRCEVSGIPKPEVAWFLEGTpvrrQEGSIEVYEDAGSHY  
AFPKFESKPPQSQEVKENQTVKFRCE-----  
AFPKFESKPPQSQEVKENQTVKFRCEVSGIPKPEVAWFLEGTpvrrQEGSIEVYEDAGSHY  
AFPKFESKPPQSQEVKENQTVKFRCE-----  
AFPKFESKPPQSQEVKENQTVKFRCEVSGIPKPEVAWFLEGTpvrrQEGSIEVYEDAGSHY  
-----  
-----  
-----  
RFPKFESQPQSQEVTEGQTVKFTCEVSGIPKPEVGWFLLEGIPvrrQEGIVEIYEDGTSHY  
TFPRFESQPQSQEVTEGQTVKFICEVSGIPKPDVGWFLLEGIPvrrREGITEVYEDGVSHH  
IPPFESRPPQSLEASEGQEIKFKSKVSGKPKPDVEWFKEGVPIKTGEG-IQIYEEDGTHC

-----  
LCLLKARTRDSGTYSCTASNAQQQLSCSWTLQVERLAVMEVAPSFSSVLKDCAVIEGQDF  
-----GLAVMEVAPSFSSVLKDCAVIEGQDF  
LCLLKARTRDSGTYSCTASNAQQQLSCSWTLQVERLAVMEVAPSFSSVLKDCAVIEGQDF  
-----GLAVMEVAPSFSSVLKDCAVIEGQDF  
-----  
-----  
LCLLKARTRDSGTYSCTASNAQQQLSCSWTLQVERLAVMEVAPSFSSVLKDCAVIEGQDF  
-----GLAVMEVAPSFSSVLKDCAVIEGQDF  
LCLLKARTRDSGTYSCTASNAQQQLSCSWTLQVERLAVMEVAPSFSSVLKDCAVIEGQDF  
-----GLAVMEVAPSFSSVLKDCAVIEGQDF  
LCLLKARTRDSGTYSCTASNAQQQVSCSWTLQVERLAVMEVAPSFSSVLKDCAVIEGQDF  
-----  
-----  
LCLPRAGTRDSGRYSCTASNTLGQVSCSWTLRVDRPSLTQTAPSFSSVLKDSVVIEGQDF  
LCLLRARTRDSGRYSCTASNSLGQVSCSWLLVDRPNLAQTAPSFSSVLKDSVVIEGQDF  
LWLKKACLGDSGSYSCAAFNPRGQTSTSWLLTVKRPKVEEVAPCFSSVLKGCTVSEGQDF

-----  
VLQCSVRGTPVPVPRITWLLNGQPIQYARSTCEAGVAELHIQDALPEDHGTYTCLAENALGQ  
VLQCSVRGTPVPVPRITWLLNGQPIQYARSTCEAGVAELHIQDALPEDHGTYTCLAENALGQ  
VLQCSVRGTPVPVPRITWLLNGQPIQYARSTCEAGVAELHIQDALPEDHGTYTCLAENALGQ  
VLQCSVRGTPVPVPRITWLLNGQPIQYARSTCEAGVAELHIQDALPEDHGTYTCLAENALGQ  
-----  
-----  
-----  
VLQCSVRGTPVPVPRITWLLNGQPIQYARSTCEAGVAELHIQDALPEDHGTYTCLAENALGQ  
VLQCSVRGTPVPVPRITWLLNGQPIQYARSTCEAGVAELHIQDALPEDHGTYTCLAENALGQ  
VLQCSVRGTPVPVPRITWLLNGQPIQYARSTCEAGVAELHIQDALPEDHGTYTCLAENALGQ  
VLQCSVRGTPVPVPRITWLLNGQPIQYARSTCEAGVAELHIQDALPEDHGTYTCLAENALGQ  
VLQCSVRGTPVPVPRITWLLNGQPIQYARSTCEAGVAELHIQDALPEDHGTYTCLAENALGQ  
-----  
-----  
-----  
VLRCSVRGTPAPQVTWLLNGQPIQFARSICEAGEAELHIQDALPEDRGTYTCLAENALGQ  
VLRCSVQGTAPAPVVTWLLNGQPIQFAHSICEAGVAELHIQDALPEDRGTYTCLAENAMGQ  
VLQCYVGVPVPEITWLLNEQPIQYAHSTFEAGVAKLTVQDALPEDDGIYTCLAENNAGR

-----  
VSCSAWTVVHEKKSSRKSEYLLPVAPSKPTAPIFLQGLSDLKVMGDSQVTMTVQVSGNPP  
VSCSAWTVVHEKKSSRKSEYLLPVAPSKPTAPIFLQGLSDLKVMGDSQVTMTVQVSGNPP  
VSCSAWTVVHEKKSSRKSEYLLPVAPSKPTAPIFLQGLSDLKVMGDSQVTMTVQVSGNPP  
VSCSAWTVVHEKKSSRKSEYLLPVAPSKPTAPIFLQGLSDLKVMGDSQVTMTVQVSGNPP  
-----  
-----  
-----  
VSCSAWTVVHEKKSSRKSEYLLPVAPSKPTAPIFLQGLSDLKVMGDSQVTMTVQVSGNPP  
VSCSAWTVVHEKKSSRKSEYLLPVAPSKPTAPIFLQGLSDLKVMGDSQVTMTVQVSGNPP  
VSCSAWTVVHEKKSSRKSEYLLPVAPSKPTAPIFLQGLSDLKVMGDSQVTMTVQVSGNPP  
VSCSAWTVVHEKKSSRKSEYLLPVAPSKPTAPIFLQGLSDLKVMGDSQVTMTVQVSGNPP  
VSCSAWTVVHEKKSSRKSEYLLPVAPSKPTAPIFLQGLSDLKVMGDSQVTMTVQVSGNPP  
-----  
-----  
-----  
VSCSATVTVQEKKGEGERAHLRPPAPSKLFAPIFLQGLSDLKVMGDSQVTMTVQVSGNPP  
VSCSATVTVQEKKGEGEREHLRSPARSKPIAPIFLQGLSDLKVMGDSQVTMTVQVSGNPP  
ASCSAQVTVKEKKSSKKAEGTQAANKNTFAPIFLKLGLTDLKVMGDSQVIMTVEVSANPC

-----  
PEVIWLHNGNEIQESEDHFHEQRGTQHSCLIQEVFPEDTGTYTCEAWNSAGEVRTQAVLT  
PEVIWLHNGNEIQESEDHFHEQRGTQHSCLIQEVFPEDTGTYTCEAWNSAGEVRTQAVLT



|          |       |              |      |                   |                                                               |
|----------|-------|--------------|------|-------------------|---------------------------------------------------------------|
| 01:9606  | 14202 | 0#NP_444259  | MYLK | Homo_sapiens      | -----                                                         |
| 01:9606  | 14202 | 0#NP_444260  | MYLK | Homo_sapiens      | -----                                                         |
| 01:9606  | 14202 | NM_005965    | MYLK | Homo_sapiens      | RQHTEEAIRQQEVEQLDFRDLLGKKVSTKTLSEDDLKEIPAEQMDFRANLQRQVKPKTVS  |
| 01:9606  | 14202 | NM_053025    | MYLK | Homo_sapiens      | RQHTEEAIRQQEVEQLDFRDLLGKKVSTKTLSEDDLKEIPAEQMDFRANLQRQVKPKTVS  |
| 01:9606  | 14202 | NM_053026    | MYLK | Homo_sapiens      | RQHTEEAIRQQEVEQLDFRDLLGKKVSTKTLSEDDLKEIPAEQMDFRANLQRQVKPKTVS  |
| 01:9606  | 14202 | NM_053027    | MYLK | Homo_sapiens      | RQHTEEAIRQQEVEQLDFRDLLGKKVSTKTLSEDDLKEIPAEQMDFRANLQRQVKPKTVS  |
| 01:9606  | 14202 | NM_053028    | MYLK | Homo_sapiens      | RQHTEEAIRQQEVEQLDFRDLLGKKVSTKTLSEDDLKEIPAEQMDFRANLQRQVKPKTVS  |
| 01:9606  | 14202 | NM_053029    | MYLK | Homo_sapiens      | RQHTEEAIRQQEVEQLDFRDLLGKKVSTKTLSEDDLKEIPAEQMDFRANLQRQVKPKTVS  |
| 01:9606  | 14202 | NM_053030    | MYLK | Homo_sapiens      | RQHTEEAIRQQEVEQLDFRDLLGKKVSTKTLSEDDLKEIPAEQMDFRANLQRQVKPKTVS  |
| 01:9606  | 14202 | NM_053031    | MYLK | Homo_sapiens      | -----                                                         |
| 01:9606  | 14202 | NM_053032    | MYLK | Homo_sapiens      | -----                                                         |
| 06:10116 | 14202 | NM_001105874 | Mylk | Rattus_norvegicus | RLHTEEAIRQQEVEGQLDFRDLLGKKVSTKTVSEDDLKDIPAEQMDFRANLQRQVKPKTVS |
| 07:10090 | 14202 | NM_139300    | Mylk | Mus_musculus      | RLHTEEAIRQQEVEGQLDFRDLLGKKVSTKTVSEDDLKDIPAEQMDFRANLQRQVKPKTVS |
| 08:9031  | 14202 | NM_205459    | MYLK | Gallus_gallus     | REHTEESLRQQEAEQLDFRDILGKKVSTKSFSEEDLKEIPAEQMDFRANLQRQVKPKTVS  |

|          |                |              |      |                   |                                                                  |
|----------|----------------|--------------|------|-------------------|------------------------------------------------------------------|
| 00:1     | Ac-SIFQKTGNAVR | -----        |      |                   |                                                                  |
| 01:9606  | 14202          | 0#NP_444253  | MYLK | Homo_sapiens      | EEERKVHSPQQVDFRSVLAKKGTSKTPVPEKVPVPPKATPDFRSVLGGKKKLPAAENGSSS    |
| 01:9606  | 14202          | 0#NP_444254  | MYLK | Homo_sapiens      | EEERKVHSPQQVDFRSVLAKKGTSKTPVPEKVPVPPKATPDFRSVLGGKKKLPAAENGSSS    |
| 01:9606  | 14202          | 0#NP_444255  | MYLK | Homo_sapiens      | EEERKVHSPQQVDFRSVLAKKGTSKTPVPEKVPVPPKATPDFRSVLGGKKKLPAAENGSSS    |
| 01:9606  | 14202          | 0#NP_444256  | MYLK | Homo_sapiens      | EEERKVHSPQQVDFRSVLAKKGTSKTPVPEKVPVPPKATPDFRSVLGGKKKLPAAENGSSS    |
| 01:9606  | 14202          | 0#NP_444259  | MYLK | Homo_sapiens      | -----                                                            |
| 01:9606  | 14202          | 0#NP_444260  | MYLK | Homo_sapiens      | -----                                                            |
| 01:9606  | 14202          | NM_005965    | MYLK | Homo_sapiens      | EEERKVHSPQQVDFRSVLAKKGTSKTPVPEKVPVPPKATPDFRSVLGGKKKLPAAENGSSS    |
| 01:9606  | 14202          | NM_053025    | MYLK | Homo_sapiens      | EEERKVHSPQQVDFRSVLAKKGTSKTPVPEKVPVPPKATPDFRSVLGGKKKLPAAENGSSS    |
| 01:9606  | 14202          | NM_053026    | MYLK | Homo_sapiens      | EEERKVHSPQQVDFRSVLAKKGTSKTPVPEKVPVPPKATPDFRSVLGGKKKLPAAENGSSS    |
| 01:9606  | 14202          | NM_053027    | MYLK | Homo_sapiens      | EEERKVHSPQQVDFRSVLAKKGTSKTPVPEKVPVPPKATPDFRSVLGGKKKLPAAENGSSS    |
| 01:9606  | 14202          | NM_053028    | MYLK | Homo_sapiens      | EEERKVHSPQQVDFRSVLAKKGTSKTPVPEKVPVPPKATPDFRSVLGGKKKLPAAENGSSS    |
| 01:9606  | 14202          | NM_053029    | MYLK | Homo_sapiens      | EEERKVHSPQQVDFRSVLAKKGTSKTPVPEKVPVPPKATPDFRSVLGGKKKLPAAENGSSS    |
| 01:9606  | 14202          | NM_053030    | MYLK | Homo_sapiens      | EEERKVHSPQQVDFRSVLAKKGTSKTPVPEKVPVPPKATPDFRSVLGGKKKLPAAENGSSS    |
| 01:9606  | 14202          | NM_053031    | MYLK | Homo_sapiens      | -----                                                            |
| 01:9606  | 14202          | NM_053032    | MYLK | Homo_sapiens      | -----                                                            |
| 06:10116 | 14202          | NM_001105874 | Mylk | Rattus_norvegicus | EEERKVHSPQQVDFRSVLAKKGTPTKTPVPEKVPVPPKAAATPDFRSVLGGKKKSPAENGSGNT |
| 07:10090 | 14202          | NM_139300    | Mylk | Mus_musculus      | EEERKVHSPQQVDFRSVLAKKGTPTKTPVPEKAP--PKAATPDFRSVLGGKKKSPSENGGNS   |
| 08:9031  | 14202          | NM_205459    | MYLK | Gallus_gallus     | EEERKVHAPQQVDFRSVLAKKGTPTKPLPEKVPVPPKPAVTDPDFRSVLGAKKKPPAENGSGAS |

|          |                |              |      |                   |                                                                |
|----------|----------------|--------------|------|-------------------|----------------------------------------------------------------|
| 00:1     | Ac-SIFQKTGNAVR | -----        |      |                   |                                                                |
| 01:9606  | 14202          | 0#NP_444253  | MYLK | Homo_sapiens      | AETLNAKAVESSKPLSNAQPSGGLPKPVGNAPPAETLKPMPGNAPPAETLKPMPGNAPDENL |
| 01:9606  | 14202          | 0#NP_444254  | MYLK | Homo_sapiens      | AETLNAKAVESSKPLSNAQPSGGLPKPVGNAPPAETLKPMPGNAPPAETLKPMPGNAPDENL |
| 01:9606  | 14202          | 0#NP_444255  | MYLK | Homo_sapiens      | AETLNAKAVESSKPLSNAQPSGGLPKPVGNAPPAETLKPMPGNAPPAETLKPMPGNAPDENL |
| 01:9606  | 14202          | 0#NP_444256  | MYLK | Homo_sapiens      | AETLNAKAVESSKPLSNAQPSGGLPKPVGNAPPAETLKPMPGNAPPAETLKPMPGNAPDENL |
| 01:9606  | 14202          | 0#NP_444259  | MYLK | Homo_sapiens      | -----                                                          |
| 01:9606  | 14202          | 0#NP_444260  | MYLK | Homo_sapiens      | -----                                                          |
| 01:9606  | 14202          | NM_005965    | MYLK | Homo_sapiens      | AETLNAKAVESSKPLSNAQPSGGLPKPVGNAPPAETLKPMPGNAPPAETLKPMPGNAPDENL |
| 01:9606  | 14202          | NM_053025    | MYLK | Homo_sapiens      | AETLNAKAVESSKPLSNAQPSGGLPKPVGNAPPAETLKPMPGNAPPAETLKPMPGNAPDENL |
| 01:9606  | 14202          | NM_053026    | MYLK | Homo_sapiens      | AETLNAKAVESSKPLSNAQPSGGLPKPVGNAPPAETLKPMPGNAPPAETLKPMPGNAPDENL |
| 01:9606  | 14202          | NM_053027    | MYLK | Homo_sapiens      | AETLNAKAVESSKPLSNAQPSGGLPKPVGNAPPAETLKPMPGNAPPAETLKPMPGNAPDENL |
| 01:9606  | 14202          | NM_053028    | MYLK | Homo_sapiens      | AETLNAKAVESSKPLSNAQPSGGLPKPVGNAPPAETLKPMPGNAPPAETLKPMPGNAPDENL |
| 01:9606  | 14202          | NM_053029    | MYLK | Homo_sapiens      | AETLNAKAVESSKPLSNAQPSGGLPKPVGNAPPAETLKPMPGNAPPAETLKPMPGNAPDENL |
| 01:9606  | 14202          | NM_053030    | MYLK | Homo_sapiens      | AETLNAKAVESSKPLSNAQPSGGLPKPVGNAPPAETLKPMPGNAPPAETLKPMPGNAPDENL |
| 01:9606  | 14202          | NM_053031    | MYLK | Homo_sapiens      | -----                                                          |
| 01:9606  | 14202          | NM_053032    | MYLK | Homo_sapiens      | -----                                                          |
| 06:10116 | 14202          | NM_001105874 | Mylk | Rattus_norvegicus | AEVLNVKAGESPTPAGNAQPVGALKPIGNAKPAETLKSVMGNAPPAETLKPVMGNAPPAETL |
| 07:10090 | 14202          | NM_139300    | Mylk | Mus_musculus      | AEVLNVKAGESPTPAGDAQAIGALKPVGNAPPAETPKPIGNAKPTETLKPVGNT-----    |
| 08:9031  | 14202          | NM_205459    | MYLK | Gallus_gallus     | TPAPNARAGSEAQNATPNSEA-----PAPK-----                            |

|          |                |              |      |                   |                                                               |
|----------|----------------|--------------|------|-------------------|---------------------------------------------------------------|
| 00:1     | Ac-SIFQKTGNAVR | -----        |      |                   |                                                               |
| 01:9606  | 14202          | 0#NP_444253  | MYLK | Homo_sapiens      | KSAS-----KEELKKDVK                                            |
| 01:9606  | 14202          | 0#NP_444254  | MYLK | Homo_sapiens      | KSAS-----KEELKKDVK                                            |
| 01:9606  | 14202          | 0#NP_444255  | MYLK | Homo_sapiens      | KSAS-----KEELKKDVK                                            |
| 01:9606  | 14202          | 0#NP_444256  | MYLK | Homo_sapiens      | KSAS-----KEELKKDVK                                            |
| 01:9606  | 14202          | 0#NP_444259  | MYLK | Homo_sapiens      | -----                                                         |
| 01:9606  | 14202          | 0#NP_444260  | MYLK | Homo_sapiens      | -----                                                         |
| 01:9606  | 14202          | NM_005965    | MYLK | Homo_sapiens      | KSAS-----KEELKKDVK                                            |
| 01:9606  | 14202          | NM_053025    | MYLK | Homo_sapiens      | KSAS-----KEELKKDVK                                            |
| 01:9606  | 14202          | NM_053026    | MYLK | Homo_sapiens      | KSAS-----KEELKKDVK                                            |
| 01:9606  | 14202          | NM_053027    | MYLK | Homo_sapiens      | KSAS-----KEELKKDVK                                            |
| 01:9606  | 14202          | NM_053028    | MYLK | Homo_sapiens      | KSAS-----KEELKKDVK                                            |
| 01:9606  | 14202          | NM_053029    | MYLK | Homo_sapiens      | KSAS-----KEELKKDVK                                            |
| 01:9606  | 14202          | NM_053030    | MYLK | Homo_sapiens      | KSAS-----KEELKKDVK                                            |
| 01:9606  | 14202          | NM_053031    | MYLK | Homo_sapiens      | -----                                                         |
| 01:9606  | 14202          | NM_053032    | MYLK | Homo_sapiens      | -----                                                         |
| 06:10116 | 14202          | NM_001105874 | Mylk | Rattus_norvegicus | KPVGNVKNAPETLKPIANAQPSGSKPPIANAQPIETQKSVANAKSAETPKLAGKEELKEVR |
| 07:10090 | 14202          | NM_139300    | Mylk | Mus_musculus      | -----KPAETLKPIANAQPSGSLKPVNTAQAEPQKPVGNAKSAETSKPAGKEEVKEVK    |
| 08:9031  | 14202          | NM_205459    | MYLK | Gallus_gallus     | -----PVVKKEEK                                                 |

|         |                |             |      |              |                                                   |
|---------|----------------|-------------|------|--------------|---------------------------------------------------|
| 00:1    | Ac-SIFQKTGNAVR | -----       |      |              |                                                   |
| 01:9606 | 14202          | 0#NP_444253 | MYLK | Homo_sapiens | NDVNCKRGHA-----GTTDNEKRSESQGTAPAFKQKLQDVHVAEGKLLQ |
| 01:9606 | 14202          | 0#NP_444254 | MYLK | Homo_sapiens | NDVNCKRGHA-----GTTDNEKRSESQGTAPAFKQKLQDVHVAEGKLLQ |
| 01:9606 | 14202          | 0#NP_444255 | MYLK | Homo_sapiens | NDVNCKRGHA-----GTTDNEKRSESQGTAPAFKQKLQDVHVAEGKLLQ |
| 01:9606 | 14202          | 0#NP_444256 | MYLK | Homo_sapiens | NDVNCKRGHA-----GTTDNEKRSESQGTAPAFKQKLQDVHVAEGKLLQ |
| 01:9606 | 14202          | 0#NP_444259 | MYLK | Homo_sapiens | -----                                             |
| 01:9606 | 14202          | 0#NP_444260 | MYLK | Homo_sapiens | -----                                             |







|          |       |              |      |                   |                                                              |
|----------|-------|--------------|------|-------------------|--------------------------------------------------------------|
| 01:9606  | 14202 | NM_053030    | MYLK | Homo_sapiens      | STGSPTSPLNNAEKLSEEDVSAFLEAVAEKPHVKPYFSKTIRDLEVVVEGSAARFDCKI  |
| 01:9606  | 14202 | NM_053031    | MYLK | Homo_sapiens      | STGSPTSPLNNAEKLES-EDVSAFLEAVAEKPHVKPYFSKTIRDLEVVVEGSAARFDCKI |
| 01:9606  | 14202 | NM_053032    | MYLK | Homo_sapiens      | STGSPTSPLNNAEKLSEEDVSAFLEAVAEKPHVKPYFSKTIRDLEVVVEGSAARFDCKI  |
| 06:10116 | 14202 | NM_001105874 | MyLk | Rattus_norvegicus | STGSPTSPINAEKLESEEDVSAFLEAVAEKPHVKPYFSKTIRDLEVVVEGSAARFDCKI  |
| 07:10090 | 14202 | NM_139300    | MyLk | Mus_musculus      | STGSPTSPINAEKLESEDDVSAFLEAVAEKPHVKPYFSKTIRDLEVVVEGSAARFDCKI  |
| 08:9031  | 14202 | NM_205459    | MYLK | Gallus_gallus     | SGSSPTSPINADKVENED---AFLEEVAEEKPHVKPYFTKTILDMEVVVEGSAARFDCKI |

|          |                |              |      |                   |                                                              |
|----------|----------------|--------------|------|-------------------|--------------------------------------------------------------|
| 00:1     | Ac-SIFQKTGNAVR |              |      |                   | -----                                                        |
| 01:9606  | 14202          | 0#NP_444253  | MYLK | Homo_sapiens      | EGYPDPEVVWFKDDQSIRESRHFQIDYDEDGNCSLIISDVCGDDDAKYTCKAVNSLGEAT |
| 01:9606  | 14202          | 0#NP_444254  | MYLK | Homo_sapiens      | EGYPDPEVVWFKDDQSIRESRHFQIDYDEDGNCSLIISDVCGDDDAKYTCKAVNSLGEAT |
| 01:9606  | 14202          | 0#NP_444255  | MYLK | Homo_sapiens      | EGYPDPEVVWFKDDQSIRESRHFQIDYDEDGNCSLIISDVCGDDDAKYTCKAVNSLGEAT |
| 01:9606  | 14202          | 0#NP_444256  | MYLK | Homo_sapiens      | EGYPDPEVVWFKDDQSIRESRHFQIDYDEDGNCSLIISDVCGDDDAKYTCKAVNSLGEAT |
| 01:9606  | 14202          | 0#NP_444259  | MYLK | Homo_sapiens      | EGYPDPEVVWFKDDQSIRESRHFQIDYDEDGNCSLIISDVCGDDDAKYTCKAVNSLGEAT |
| 01:9606  | 14202          | 0#NP_444260  | MYLK | Homo_sapiens      | EGYPDPEVVWFKDDQSIRESRHFQIDYDEDGNCSLIISDVCGDDDAKYTCKAVNSLGEAT |
| 01:9606  | 14202          | NM_005965    | MYLK | Homo_sapiens      | EGYPDPEVVWFKDDQSIRESRHFQIDYDEDGNCSLIISDVCGDDDAKYTCKAVNSLGEAT |
| 01:9606  | 14202          | NM_053025    | MYLK | Homo_sapiens      | EGYPDPEVVWFKDDQSIRESRHFQIDYDEDGNCSLIISDVCGDDDAKYTCKAVNSLGEAT |
| 01:9606  | 14202          | NM_053026    | MYLK | Homo_sapiens      | EGYPDPEVVWFKDDQSIRESRHFQIDYDEDGNCSLIISDVCGDDDAKYTCKAVNSLGEAT |
| 01:9606  | 14202          | NM_053027    | MYLK | Homo_sapiens      | EGYPDPEVVWFKDDQSIRESRHFQIDYDEDGNCSLIISDVCGDDDAKYTCKAVNSLGEAT |
| 01:9606  | 14202          | NM_053028    | MYLK | Homo_sapiens      | EGYPDPEVVWFKDDQSIRESRHFQIDYDEDGNCSLIISDVCGDDDAKYTCKAVNSLGEAT |
| 01:9606  | 14202          | NM_053029    | MYLK | Homo_sapiens      | -----                                                        |
| 01:9606  | 14202          | NM_053030    | MYLK | Homo_sapiens      | EGYPDPEVVWFKDDQSIRESRHFQIDYDEDGNCSLIISDVCGDDDAKYTCKAVNSLGEAT |
| 01:9606  | 14202          | NM_053031    | MYLK | Homo_sapiens      | EGYPDPEVVWFKDDQSIRESRHFQIDYDEDGNCSLIISDVCGDDDAKYTCKAVNSLGEAT |
| 01:9606  | 14202          | NM_053032    | MYLK | Homo_sapiens      | EGYPDPEVVWFKDDQSIRESRHFQIDYDEDGNCSLIISDVCGDDDAKYTCKAVNSLGEAT |
| 06:10116 | 14202          | NM_001105874 | MyLk | Rattus_norvegicus | EGYPDPEVVWFKDDQSIRESRHFQIDYDEDGNCSLIISDVCGDDDAKYTCKAVNSLGEAT |
| 07:10090 | 14202          | NM_139300    | MyLk | Mus_musculus      | EGYPDPEVVWFKDDQSIRESRHFQIDYDEDGNCSLIISDVCGDDDAKYTCKAVNSLGEAT |
| 08:9031  | 14202          | NM_205459    | MYLK | Gallus_gallus     | EGYPDPEVMWYKDDQPVKESRHFQIDYDEEGNCSLTISEVCGDDDAKYTCKAVNSLGEAT |

|          |                |              |      |                   |                                |
|----------|----------------|--------------|------|-------------------|--------------------------------|
| 00:1     | Ac-SIFQKTGNAVR |              |      |                   | -----                          |
| 01:9606  | 14202          | 0#NP_444253  | MYLK | Homo_sapiens      | CTAELIVETME-EGEGEGEEEE-----    |
| 01:9606  | 14202          | 0#NP_444254  | MYLK | Homo_sapiens      | CTAELIVETME-EGEGEGEEEE-----    |
| 01:9606  | 14202          | 0#NP_444255  | MYLK | Homo_sapiens      | CTAELIVETME-EGEGEGEEEE-----    |
| 01:9606  | 14202          | 0#NP_444256  | MYLK | Homo_sapiens      | CTAELIVETME-EGEGEGEEEE-----    |
| 01:9606  | 14202          | 0#NP_444259  | MYLK | Homo_sapiens      | CTAELIVETME-EGEGEGEEEE-----    |
| 01:9606  | 14202          | 0#NP_444260  | MYLK | Homo_sapiens      | CTAELIVETME-EGEGEGEEEE-----    |
| 01:9606  | 14202          | NM_005965    | MYLK | Homo_sapiens      | CTAELIVETME-EGEGEGEEEE-----    |
| 01:9606  | 14202          | NM_053025    | MYLK | Homo_sapiens      | CTAELIVETME-EGEGEGEEEE-----    |
| 01:9606  | 14202          | NM_053026    | MYLK | Homo_sapiens      | CTAELIVETME-EGEGEGEEEE-----    |
| 01:9606  | 14202          | NM_053027    | MYLK | Homo_sapiens      | CTAELIVETME-EGEGEGEEEE-----    |
| 01:9606  | 14202          | NM_053028    | MYLK | Homo_sapiens      | CTAELIVETME-EGEGEGEEEE-----    |
| 01:9606  | 14202          | NM_053029    | MYLK | Homo_sapiens      | -----                          |
| 01:9606  | 14202          | NM_053030    | MYLK | Homo_sapiens      | CTAELIVETME-EGEGEGEEEE-----    |
| 01:9606  | 14202          | NM_053031    | MYLK | Homo_sapiens      | CTAELIVETME-EGEGEGEEEE-----    |
| 01:9606  | 14202          | NM_053032    | MYLK | Homo_sapiens      | CTAELIVETME-EGEGEGEEEE-----    |
| 06:10116 | 14202          | NM_001105874 | MyLk | Rattus_norvegicus | CTAELIVETME-EGEGEEGGEEEEEEEE-- |
| 07:10090 | 14202          | NM_139300    | MyLk | Mus_musculus      | CTAELIVETME-EGEGEEGGEEEEEEEE-- |
| 08:9031  | 14202          | NM_205459    | MYLK | Gallus_gallus     | CTAELLIVETMGKEGEGEGEGEEDEEEEEE |

*YTHDC1*

Ac-TDGPVLLPR  
Ac-MDGPVLLPR

CLUSTAL O(1.2.1) multiple sequence alignment

|          |  |                                              |       |                                                              |
|----------|--|----------------------------------------------|-------|--------------------------------------------------------------|
| 00:1     |  | Ac-TDGPVLLPR                                 | ----- | -TDGPVLLPR-----                                              |
| 00:2     |  | Ac-MDGPVLLPR                                 | ----- | -MDGPVLLPR-----                                              |
| 01:9606  |  | 15796 0#NP_001026902 YTHDC1 Homo_sapiens     | ----- |                                                              |
| 01:9606  |  | 15796 0#NP_588611 YTHDC1 Homo_sapiens        | ----- |                                                              |
| 01:9606  |  | 15796 NM_001031732 YTHDC1 Homo_sapiens       | ----- | -----EAKCDARIR-----ADGLTDGPVLLPRLRRPRESRLSG--GG              |
| 01:9606  |  | 15796 NM_133370 YTHDC1 Homo_sapiens          | ----- | -----EAKCDARIR-----ADGLTDGPVLLPRLRRPRESRLSG--GG              |
| 04:9913  |  | 15796 NM_001046520 YTHDC1 Bos_taurus         | ----- | -----RPCRARSP-----ADGLTDAPVLLPRLRHPRESRSGGG                  |
| 06:10116 |  | 15796 NM_133423 Ythdcl Rattus_norvegicus     | ----- |                                                              |
| 07:10090 |  | 15796 NM_177680 Ythdcl Mus_musculus          | ----- |                                                              |
| 09:8364  |  | 15796 NM_001008120 ythdcl Xenopus_tropicalis | ----- | -----PRLRRPRDSRPG--GG                                        |
| 10:7955  |  | 15796 NM_001007410 ythdcl Danio_rerio        | ----- | NFHSERPPGPGSGGCPHGICFATAGERGARGGGDSVTSNSVGFSSRRR--RCRRKRKRGK |
| 00:1     |  | Ac-TDGPVLLPR                                 | ----- |                                                              |
| 00:2     |  | Ac-MDGPVLLPR                                 | ----- |                                                              |
| 01:9606  |  | 15796 0#NP_001026902 YTHDC1 Homo_sapiens     | ----- | -----MAADSREEKDGE                                            |
| 01:9606  |  | 15796 0#NP_588611 YTHDC1 Homo_sapiens        | ----- | -----MAADSREEKDGE                                            |
| 01:9606  |  | 15796 NM_001031732 YTHDC1 Homo_sapiens       | ----- | GGSGGNRRGAMAADSREEKDGE                                       |
| 01:9606  |  | 15796 NM_133370 YTHDC1 Homo_sapiens          | ----- | GGSGGNRRGAMAADSREEKDGE                                       |
| 04:9913  |  | 15796 NM_001046520 YTHDC1 Bos_taurus         | ----- | SSSIGNKRGAMAADSREEKDGE                                       |
| 06:10116 |  | 15796 NM_133423 Ythdcl Rattus_norvegicus     | ----- | -----MAADSREEKDGE                                            |
| 07:10090 |  | 15796 NM_177680 Ythdcl Mus_musculus          | ----- | GGGGGSRRAAMAADSREEKDGE                                       |
| 09:8364  |  | 15796 NM_001008120 ythdcl Xenopus_tropicalis | ----- | TLRNSTDRSMEAERGEQ                                            |
| 10:7955  |  | 15796 NM_001007410 ythdcl Danio_rerio        | ----  | IHAGLKMSVDRRDEKDGE                                           |
| 00:1     |  | Ac-TDGPVLLPR                                 | ----- |                                                              |
| 00:2     |  | Ac-MDGPVLLPR                                 | ----- |                                                              |
| 01:9606  |  | 15796 0#NP_001026902 YTHDC1 Homo_sapiens     | ----- | RMESTD                                                       |
| 01:9606  |  | 15796 0#NP_588611 YTHDC1 Homo_sapiens        | ----- | RMESTD                                                       |
| 01:9606  |  | 15796 NM_001031732 YTHDC1 Homo_sapiens       | ----- | RMESTD                                                       |
| 01:9606  |  | 15796 NM_133370 YTHDC1 Homo_sapiens          | ----- | RMESTD                                                       |
| 04:9913  |  | 15796 NM_001046520 YTHDC1 Bos_taurus         | ----- | RMESAD                                                       |
| 06:10116 |  | 15796 NM_133423 Ythdcl Rattus_norvegicus     | ----- | RMESID                                                       |
| 07:10090 |  | 15796 NM_177680 Ythdcl Mus_musculus          | ----- | RMESTD                                                       |
| 09:8364  |  | 15796 NM_001008120 ythdcl Xenopus_tropicalis | ----- | RIEMTEN                                                      |
| 10:7955  |  | 15796 NM_001007410 ythdcl Danio_rerio        | ----- | RGDAQD                                                       |
| 00:1     |  | Ac-TDGPVLLPR                                 | ----- |                                                              |
| 00:2     |  | Ac-MDGPVLLPR                                 | ----- |                                                              |
| 01:9606  |  | 15796 0#NP_001026902 YTHDC1 Homo_sapiens     | ----- | DADR                                                         |
| 01:9606  |  | 15796 0#NP_588611 YTHDC1 Homo_sapiens        | ----- | DADR                                                         |
| 01:9606  |  | 15796 NM_001031732 YTHDC1 Homo_sapiens       | ----- | DADR                                                         |
| 01:9606  |  | 15796 NM_133370 YTHDC1 Homo_sapiens          | ----- | DADR                                                         |
| 04:9913  |  | 15796 NM_001046520 YTHDC1 Bos_taurus         | ----- | EADR                                                         |
| 06:10116 |  | 15796 NM_133423 Ythdcl Rattus_norvegicus     | ----- | DADR                                                         |
| 07:10090 |  | 15796 NM_177680 Ythdcl Mus_musculus          | ----- | DADR                                                         |
| 09:8364  |  | 15796 NM_001008120 ythdcl Xenopus_tropicalis | ----- | DGDR                                                         |
| 10:7955  |  | 15796 NM_001007410 ythdcl Danio_rerio        | ----- | GGAS                                                         |
| 00:1     |  | Ac-TDGPVLLPR                                 | ----- |                                                              |
| 00:2     |  | Ac-MDGPVLLPR                                 | ----- |                                                              |
| 01:9606  |  | 15796 0#NP_001026902 YTHDC1 Homo_sapiens     | ----- | -SSKEEVN                                                     |
| 01:9606  |  | 15796 0#NP_588611 YTHDC1 Homo_sapiens        | ----- | -SSKEEVN                                                     |
| 01:9606  |  | 15796 NM_001031732 YTHDC1 Homo_sapiens       | ----- | -SSKEEVN                                                     |
| 01:9606  |  | 15796 NM_133370 YTHDC1 Homo_sapiens          | ----- | -SSKEEVN                                                     |
| 04:9913  |  | 15796 NM_001046520 YTHDC1 Bos_taurus         | ----- | -SSKEEVN                                                     |
| 06:10116 |  | 15796 NM_133423 Ythdcl Rattus_norvegicus     | ----- | -SSKEEGN                                                     |
| 07:10090 |  | 15796 NM_177680 Ythdcl Mus_musculus          | ----- | -SSKEEVN                                                     |
| 09:8364  |  | 15796 NM_001008120 ythdcl Xenopus_tropicalis | ----- | -S-SNEG                                                      |
| 10:7955  |  | 15796 NM_001007410 ythdcl Danio_rerio        | ----- | SSREEEAH                                                     |
| 00:1     |  | Ac-TDGPVLLPR                                 | ----- |                                                              |
| 00:2     |  | Ac-MDGPVLLPR                                 | ----- |                                                              |
| 01:9606  |  | 15796 0#NP_001026902 YTHDC1 Homo_sapiens     | ----- | EDGE                                                         |
| 01:9606  |  | 15796 0#NP_588611 YTHDC1 Homo_sapiens        | ----- | EDGE                                                         |
| 01:9606  |  | 15796 NM_001031732 YTHDC1 Homo_sapiens       | ----- | EDGE                                                         |
| 01:9606  |  | 15796 NM_133370 YTHDC1 Homo_sapiens          | ----- | EDGE                                                         |
| 04:9913  |  | 15796 NM_001046520 YTHDC1 Bos_taurus         | ----- | EDAE                                                         |
| 06:10116 |  | 15796 NM_133423 Ythdcl Rattus_norvegicus     | ----- | EDAE                                                         |
| 07:10090 |  | 15796 NM_177680 Ythdcl Mus_musculus          | ----- | EDAE                                                         |
| 09:8364  |  | 15796 NM_001008120 ythdcl Xenopus_tropicalis | ----- | -----GEEA                                                    |
| 10:7955  |  | 15796 NM_001007410 ythdcl Danio_rerio        | ----- | -----KEGE                                                    |
| 00:1     |  | Ac-TDGPVLLPR                                 | ----- |                                                              |
| 00:2     |  | Ac-MDGPVLLPR                                 | ----- |                                                              |
| 01:9606  |  | 15796 0#NP_001026902 YTHDC1 Homo_sapiens     | ----- | TDGS                                                         |
| 01:9606  |  | 15796 0#NP_588611 YTHDC1 Homo_sapiens        | ----- | TDGS                                                         |
| 01:9606  |  | 15796 NM_001031732 YTHDC1 Homo_sapiens       | ----- | TDGS                                                         |

|          |  |       |  |              |  |        |  |                    |                                                              |
|----------|--|-------|--|--------------|--|--------|--|--------------------|--------------------------------------------------------------|
| 01:9606  |  | 15796 |  | NM_133370    |  | YTHDC1 |  | Homo_sapiens       | TDGSV-RSGSGTDGSDEKKKKRKRARGISPIVFDMSGSSASESYA-----           |
| 04:9913  |  | 15796 |  | NM_001046520 |  | YTHDC1 |  | Bos_taurus         | TDGSV-RSGSGTDGSDEKKKKRKRARGISPIVFDMSGSSASESYAGSEKKHEKLSSSVRA |
| 06:10116 |  | 15796 |  | NM_133423    |  | Ythdc1 |  | Rattus_norvegicus  | TDGSV-RSGSGTDGSDEKKKKRKRARGISPIVFDMSGSSASESYAGSEKKHEKLSSSVRA |
| 07:10090 |  | 15796 |  | NM_177680    |  | Ythdc1 |  | Mus_musculus       | TDGSV-RSGSGTDGSDEKKKKRKRARGISPIVFDMSGSSASESYAGSEKKHEKLSSSVRA |
| 09:8364  |  | 15796 |  | NM_001008120 |  | ythdc1 |  | Xenopus_tropicalis | TDGDSVRSGSGS-----DISGSEKKHEKLPSVVRD                          |
| 10:7955  |  | 15796 |  | NM_001007410 |  | ythdc1 |  | Danio_rerio        | SDGESVHSASGS-----DASGSEKKHEKLSSSVRD                          |

|          |  |              |                                        |                                                               |
|----------|--|--------------|----------------------------------------|---------------------------------------------------------------|
| 00:1     |  | Ac-TDGPVLLPR | -----                                  |                                                               |
| 00:2     |  | Ac-MDGPVLLPR | -----                                  |                                                               |
| 01:9606  |  | 15796        | 0#NP_001026902 YTHDC1 Homo_sapiens     | VRKDQTSKLKYVLQDARFFLIKSNNHENVSLAKAKGVWSTLPVNEKKLNLAFRSARSVIL  |
| 01:9606  |  | 15796        | 0#NP_588611 YTHDC1 Homo_sapiens        | ---DQTSKLKYVLQDARFFLIKSNNHENVSLAKAKGVWSTLPVNEKKLNLAFRSARSVIL  |
| 01:9606  |  | 15796        | NM_001031732 YTHDC1 Homo_sapiens       | VRKDQTSKLKYVLQDARFFLIKSNNHENVSLAKAKGVWSTLPVNEKKLNLAFRSARSVIL  |
| 01:9606  |  | 15796        | NM_133370 YTHDC1 Homo_sapiens          | ---DQTSKLKYVLQDARFFLIKSNNHENVSLAKAKGVWSTLPVNEKKLNLAFRSARSVIL  |
| 04:9913  |  | 15796        | NM_001046520 YTHDC1 Bos_taurus         | VRKDQTSKLKYVLQDARFFLIKSNNHENVSLAKAKGVWSTLPVNEKKLNLAFRSARSVIL  |
| 06:10116 |  | 15796        | NM_133423 Ythdc1 Rattus_norvegicus     | VRKDQTSKLKSVLQDARFFLIKSNNHENVSLAKAKGVWSTLPVNEKKLNLAFRSARSVIL  |
| 07:10090 |  | 15796        | NM_177680 Ythdc1 Mus_musculus          | VRKDQTSKLKYVLQDARFFLIKSNNHENVSLAKAKGVWSTLPVNEKKLNLAFRSARSVIL  |
| 09:8364  |  | 15796        | NM_001008120 ythdc1 Xenopus_tropicalis | VRKERTNKIRIYLQEARFFLIKSNNHENVSLAKAKGVWSTLPVNEKKLNLAFRSARSVIL  |
| 10:7955  |  | 15796        | NM_001007410 ythdc1 Danio_rerio        | VRKDRINKLKHILREARFFLIKSNNHENVSLAKAKGVWSTLPVNEKKLNLAFFRAARSVVL |

|          |  |              |                                        |                                                                 |
|----------|--|--------------|----------------------------------------|-----------------------------------------------------------------|
| 00:1     |  | Ac-TDGPVLLPR | -----                                  |                                                                 |
| 00:2     |  | Ac-MDGPVLLPR | -----                                  |                                                                 |
| 01:9606  |  | 15796        | 0#NP_001026902 YTHDC1 Homo_sapiens     | IFSVRESGKFGQGFARLSSSESHHGGSPIHWVLPAGMSAKMLGGVFKIDWICRRELPF7TKSA |
| 01:9606  |  | 15796        | 0#NP_588611 YTHDC1 Homo_sapiens        | IFSVRESGKFGQGFARLSSSESHHGGSPIHWVLPAGMSAKMLGGVFKIDWICRRELPF7TKSA |
| 01:9606  |  | 15796        | NM_001031732 YTHDC1 Homo_sapiens       | IFSVRESGKFGQGFARLSSSESHHGGSPIHWVLPAGMSAKMLGGVFKIDWICRRELPF7TKSA |
| 01:9606  |  | 15796        | NM_133370 YTHDC1 Homo_sapiens          | IFSVRESGKFGQGFARLSSSESHHGGSPIHWVLPAGMSAKMLGGVFKIDWICRRELPF7TKSA |
| 04:9913  |  | 15796        | NM_001046520 YTHDC1 Bos_taurus         | IFSVRESGKFGQGFARLSSSESHHGGSPIHWVLPAGMSAKMLGGVFKIDWICRRELPF7TKSA |
| 06:10116 |  | 15796        | NM_133423 Ythdc1 Rattus_norvegicus     | IFSVRESGKFGQGFARLSSSESHHGGSPIHWVLPAGMSAKMLGGVFKIDWICRRELPF7TKSA |
| 07:10090 |  | 15796        | NM_177680 Ythdc1 Mus_musculus          | IFSVRESGKFGQGFARLSSSESHHGGSPIHWVLPAGMSAKMLGGVFKIDWICRRELPF7TKSA |
| 09:8364  |  | 15796        | NM_001008120 ythdc1 Xenopus_tropicalis | VFSVRESGKFGQGFARLSSSESHHGGSPIHWVLPAGMNAKMLGGVFKIDWICRRELPF7TKCV |
| 10:7955  |  | 15796        | NM_001007410 ythdc1 Danio_rerio        | IFSVRESGKFGQGFARLSSSESHHGGSPIHWVLPAGMNAKMLGGVFKIDWICRRELPF7TKTA |

|          |  |              |                                        |                                                                 |
|----------|--|--------------|----------------------------------------|-----------------------------------------------------------------|
| 00:1     |  | Ac-TDGPVLLPR | -----                                  |                                                                 |
| 00:2     |  | Ac-MDGPVLLPR | -----                                  |                                                                 |
| 01:9606  |  | 15796        | 0#NP_001026902 YTHDC1 Homo_sapiens     | HLTNPWNEHKPVKIGRDGQEIIELECGTQLCLLFP7PDESIDLYQVIHKMRHKRRMH7SQPRS |
| 01:9606  |  | 15796        | 0#NP_588611 YTHDC1 Homo_sapiens        | HLTNPWNEHKPVKIGRDGQEIIELECGTQLCLLFP7PDESIDLYQVIHKMRHKRRMH7SQPRS |
| 01:9606  |  | 15796        | NM_001031732 YTHDC1 Homo_sapiens       | HLTNPWNEHKPVKIGRDGQEIIELECGTQLCLLFP7PDESIDLYQVIHKMRHKRRMH7SQPRS |
| 01:9606  |  | 15796        | NM_133370 YTHDC1 Homo_sapiens          | HLTNPWNEHKPVKIGRDGQEIIELECGTQLCLLFP7PDESIDLYQVIHKMRHKRRMH7SQPRS |
| 04:9913  |  | 15796        | NM_001046520 YTHDC1 Bos_taurus         | HLTNPWNEHKPVKIGRDGQEIIELECGTQLCLLFP7PDESIDLYQVIHKMRHKRRMH7SQPRS |
| 06:10116 |  | 15796        | NM_133423 Ythdc1 Rattus_norvegicus     | HLTNPWNEHKPVKIGRDGQEIIELECGTQLCLLFP7PDESIDLYQLIHKMRHKRRMH7SQPRS |
| 07:10090 |  | 15796        | NM_177680 Ythdc1 Mus_musculus          | HLTNPWNEHKPVKIGRDGQEIIELECGTQLCLLFP7PDESIDLYQLIHKMRHKRRMH7SQPRS |
| 09:8364  |  | 15796        | NM_001008120 ythdc1 Xenopus_tropicalis | HLTNPWNEHKPVKIGRDGQEIIEPCDGTQLCLLFP7ADDSIDLYQVIHKMRHKRRMH7SQPRS |
| 10:7955  |  | 15796        | NM_001007410 ythdc1 Danio_rerio        | HLANPWNEHKPVKIGRDGQEIIEPCGTQLCMLFP7HDESIDLYQVIHKMRHKRRMH7SEPRS  |

|          |  |              |                                        |                                                                 |
|----------|--|--------------|----------------------------------------|-----------------------------------------------------------------|
| 00:1     |  | Ac-TDGPVLLPR | -----                                  |                                                                 |
| 00:2     |  | Ac-MDGPVLLPR | -----                                  |                                                                 |
| 01:9606  |  | 15796        | 0#NP_001026902 YTHDC1 Homo_sapiens     | RGRPSRREP7V-RDVGRRRPEDYDIHNSRKKPRIDYPPEFHQRPGYLKDP7RYQEVD----   |
| 01:9606  |  | 15796        | 0#NP_588611 YTHDC1 Homo_sapiens        | RGRPSRREP7V-RDVGRRRPEDYDIHNSRKKPRIDYPPEFHQRPGYLKDP7RYQEVD----   |
| 01:9606  |  | 15796        | NM_001031732 YTHDC1 Homo_sapiens       | RGRPSRREP7V-RDVGRRRPEDYDIHNSRKKPRIDYPPEFHQRPGYLKDP7RYQEVD----   |
| 01:9606  |  | 15796        | NM_133370 YTHDC1 Homo_sapiens          | RGRPSRREP7V-RDVGRRRPEDYDIHNSRKKPRIDYPPEFHQRPGYLKDP7RYQEVD----   |
| 04:9913  |  | 15796        | NM_001046520 YTHDC1 Bos_taurus         | RGRPSRREP7V-RDVGRRRPEDYDIHNSRKKPRIDYAEFHQRPGYLKDP7RYQEVD----    |
| 06:10116 |  | 15796        | NM_133423 Ythdc1 Rattus_norvegicus     | RGRPSRREP7V-RDVGRRRPEDYDIHNSRKKPRIDYPPEFHQRPGYLKDP7RYQEVD7SFTNL |
| 07:10090 |  | 15796        | NM_177680 Ythdc1 Mus_musculus          | RGRPSRREP7V-RDVGRRRPEDYDIHNSRKKPRIDYPPEFHQRPGYLKDP7RYQEVD7SFTNL |
| 09:8364  |  | 15796        | NM_001008120 ythdc1 Xenopus_tropicalis | RGRPSRREAT-REVGRRRP7EYDIHN-RKKPRIDYPPEFHQRPGFVKDP7RYQEVD----    |
| 10:7955  |  | 15796        | NM_001007410 ythdc1 Danio_rerio        | RGRLP7HREP7PRDMGRRRP7EYDMHN-RKRPRIDY7PEFPQRPGFMQDPRNP7PVD----   |

|          |  |              |                                        |                                                               |
|----------|--|--------------|----------------------------------------|---------------------------------------------------------------|
| 00:1     |  | Ac-TDGPVLLPR | -----                                  |                                                               |
| 00:2     |  | Ac-MDGPVLLPR | -----                                  |                                                               |
| 01:9606  |  | 15796        | 0#NP_001026902 YTHDC1 Homo_sapiens     | ---RRFSGVRRDVFLNGSYNDYVREFH-NMGPPPPWQGMPPYPGMEQPPHHPPYQHHAPP  |
| 01:9606  |  | 15796        | 0#NP_588611 YTHDC1 Homo_sapiens        | ---RRFSGVRRDVFLNGSYNDYVREFH-NMGPPPPWQGMPPYPGMEQPPHHPPYQHHAPP  |
| 01:9606  |  | 15796        | NM_001031732 YTHDC1 Homo_sapiens       | ---RRFSGVRRDVFLNGSYNDYVREFH-NMGPPPPWQGMPPYPGMEQPPHHPPYQHHAPP  |
| 01:9606  |  | 15796        | NM_133370 YTHDC1 Homo_sapiens          | ---RRFSGVRRDVFLNGSYNDYVREFH-NMGPPPPWQGMPPYPGMEQPPHHPPYQHHAPP  |
| 04:9913  |  | 15796        | NM_001046520 YTHDC1 Bos_taurus         | ---RRFSGVRRDVFLNGSYNDYVREFH-NMGPPPPWQGMT7PYPGMEQPPHHPPYQHHAPP |
| 06:10116 |  | 15796        | NM_133423 Ythdc1 Rattus_norvegicus     | IPNRRFSGVRRDVFLNGSYNDYVREFH-NMGPPPPWQGMPPYPGIEQPPHHPPYQHHAPP  |
| 07:10090 |  | 15796        | NM_177680 Ythdc1 Mus_musculus          | IPNRRFSGVRRDVFLNGSYNDYVREFH-NMGPPPPWQGMPPYPGIEQPPHHPPYQHHAPP  |
| 09:8364  |  | 15796        | NM_001008120 ythdc1 Xenopus_tropicalis | ---RRFTGVRRDVFLNGSYNDYVREFH-NMGPPPPWQGMPPYPAMEQAPHHPPYQHHAPP  |
| 10:7955  |  | 15796        | NM_001007410 ythdc1 Danio_rerio        | ---RRFSGVRRDVFLNGSYNDYMR7FHNI7GPPPPWQGMAPYPGMEHPPQHPPYQHHPPP  |

|          |  |              |                                        |                                                                 |
|----------|--|--------------|----------------------------------------|-----------------------------------------------------------------|
| 00:1     |  | Ac-TDGPVLLPR | -----                                  |                                                                 |
| 00:2     |  | Ac-MDGPVLLPR | -----                                  |                                                                 |
| 01:9606  |  | 15796        | 0#NP_001026902 YTHDC1 Homo_sapiens     | PQAHP7PYSGHH7PV7HEARYRDKR-----VHDYDMRVDDFLRR7TQAVVSGRRSRPRER    |
| 01:9606  |  | 15796        | 0#NP_588611 YTHDC1 Homo_sapiens        | PQAHP7PYSGHH7PV7HEARYRDKR-----VHDYDMRVDDFLRR7TQAVVSGRRSRPRER    |
| 01:9606  |  | 15796        | NM_001031732 YTHDC1 Homo_sapiens       | PQAHP7PYSGHH7PV7HEARYRDKR-----VHDYDMRVDDFLRR7TQAVVSGRRSRPRER    |
| 01:9606  |  | 15796        | NM_133370 YTHDC1 Homo_sapiens          | PQAHP7PYSGHH7PV7HEARYRDKR-----VHDYDMRVDDFLRR7TQAVVSGRRSRPRER    |
| 04:9913  |  | 15796        | NM_001046520 YTHDC1 Bos_taurus         | PQAHP7PYSGHH7PV7HEARYRDKR-----VHDYDMRVDDFLRR7TQAVVSGRRSRPRER    |
| 06:10116 |  | 15796        | NM_133423 Ythdc1 Rattus_norvegicus     | PQAHP7PYSGHH7PV7HEARYRDKR-----VHDYDMRVDDFLRR7TQAVVSGRRSRPRER    |
| 07:10090 |  | 15796        | NM_177680 Ythdc1 Mus_musculus          | PQAHP7PYSGHH7PV7HEARYRDKR-----VHDYDMRVDDFLRR7TQAVVSGRRSRPRER    |
| 09:8364  |  | 15796        | NM_001008120 ythdc1 Xenopus_tropicalis | PQAHP7QFSGHH7PVQH7DARYRDKR-----VHDYDMRVDDFLRR7TQAVVSGRRSRPRER   |
| 10:7955  |  | 15796        | NM_001007410 ythdc1 Danio_rerio        | PQAHP7PYSGHH7PM7HDARFREKRV7RSFAS7LHDYDMRVDDFLRR7TQAVVSGRRSRPRER |

00:1|Ac-TDGPVLLPR  
00:2|Ac-MDGPVLLPR  
01:9606|15796|0#NP\_001026902|YTHDC1|Homo\_sapiens  
01:9606|15796|0#NP\_588611|YTHDC1|Homo\_sapiens  
01:9606|15796|NM\_001031732|YTHDC1|Homo\_sapiens  
01:9606|15796|NM\_133370|YTHDC1|Homo\_sapiens  
04:9913|15796|NM\_001046520|YTHDC1|Bos\_taurus  
06:10116|15796|NM\_133423|Ythdc1|Rattus\_norvegicus  
07:10090|15796|NM\_177680|Ythdc1|Mus\_musculus  
09:8364|15796|NM\_001008120|ythdc1|Xenopus\_tropicalis  
10:7955|15796|NM\_001007410|ythdc1|Danio\_rerio

-----  
DRERERDRPRDNRRDRERDRGRDRERERERLCDRDRDRGERGRYRR  
DRERERDRPRDNRRDRERDRGRDRERERERLCDRDRDRGERGRYRR  
DRERERDRPRDNRRDRERDRGRDRERERERLCDRDRDRGERGRYRR  
DRERERDRPRDNRRDRERDRGRDRERERERLCDRDRDRGERGRYRR  
DRERERDRPRDNRRDRERDRGRDRERERERLCDRD-----  
DRERERDRPRDNRRDRERDRGRDRERERERICDRDRDRGERGRYRR  
DRERERDRPRDNRRDRERDRGRDRERERERICDRDRDRGERGRYRR  
ERE--RERPRDNRRDRGRDRDRDRERERMMDR-ERGDGDRGRYRR  
DRQREDRPRDGRRDRERERGRERDRERERIRDRERE-KERGRYRR

***RPRD2***

Ac-MIVLPAPAAAAAAAR

CLUSTAL O(1.2.1) multiple sequence alignment

|                                                 |                                                               |
|-------------------------------------------------|---------------------------------------------------------------|
| 00:1 Ac-MIVLPAPAAAAAAAAR                        | -----MIVLPAPAAAAAAAAR-----                                    |
| 01:9606 19997 0#NP_001284602 RPRD2 Homo_sapiens | -----                                                         |
| 01:9606 19997 0#NP_001284603 RPRD2 Homo_sapiens | -----                                                         |
| 01:9606 19997 0#NP_056018 RPRD2 Homo_sapiens    | -----                                                         |
| 01:9606 19997 NM_001297673 RPRD2 Homo_sapiens   | ELPACPAAGVPVRTSRRARVHHHPHLASLPTYGFHALAVIVLPAPAAAAAAAARGAAAL   |
| 01:9606 19997 NM_001297674 RPRD2 Homo_sapiens   | ELPACPAAGVPVRTSRRARVHHHPHLASLPTYGFHALAVIVLPAPAAAAAAAARGAAAL   |
| 01:9606 19997 NM_015203 RPRD2 Homo_sapiens      | ELPACPAAGVPVRTSRRARVHHHPHLASLPTYGFHALAVIVLPAPAAAAAAAARGAAAL   |
| 04:9913 19997 NM_001206187 RPRD2 Bos_taurus     | -----                                                         |
| 07:10090 19997 NM_001081293 Rprd2 Mus_musculus  | -----LFCPLPPPPPPP-PPEDQRRLC                                   |
| 07:10090 19997 NM_028328 Rprd2 Mus_musculus     | -----QRRLC                                                    |
| 07:10090 19997 NM_029180 Rprd2 Mus_musculus     | -----LFCPLPPPPPPP-PPEDQRRLC                                   |
| 08:9031 19997 NM_001012932 RPRD2 Gallus_gallus  | -----AP-PPSARTRLS                                             |
| 00:1 Ac-MIVLPAPAAAAAAAAR                        | -----                                                         |
| 01:9606 19997 0#NP_001284602 RPRD2 Homo_sapiens | -----MAAGGGGGSSKASSSSASSAGALESSLDRKFQSVTNTMESIQGLSSWCIENTKKHH |
| 01:9606 19997 0#NP_001284603 RPRD2 Homo_sapiens | -----MAAGGGGGSSKASSSSASSAGALESSLDRKFQSVTNTMESIQGLSSWCIENTKKHH |
| 01:9606 19997 0#NP_056018 RPRD2 Homo_sapiens    | -----MAAGGGGGSSKASSSSASSAGALESSLDRKFQSVTNTMESIQGLSSWCIENTKKHH |
| 01:9606 19997 NM_001297673 RPRD2 Homo_sapiens   | VQTGKMAAGGGGGSSKASSSSASSAGALESSLDRKFQSVTNTMESIQGLSSWCIENTKKHH |
| 01:9606 19997 NM_001297674 RPRD2 Homo_sapiens   | VQTGKMAAGGGGGSSKASSSSASSAGALESSLDRKFQSVTNTMESIQGLSSWCIENTKKHH |
| 01:9606 19997 NM_015203 RPRD2 Homo_sapiens      | VQTGKMAAGGGGGSSKASSSSASSAGALESSLDRKFQSVTNTMESIQGLSSWCIENTKKHH |
| 04:9913 19997 NM_001206187 RPRD2 Bos_taurus     | -----MAAGGGGGSSKASSSSASSAGALESSLDRKFQSVTNTMESIQGLSSWCIENTKKHH |
| 07:10090 19997 NM_001081293 Rprd2 Mus_musculus  | KP-GKMAAGGGGGSSKASSSSASSAGALESSLDRKFQSVTNTMESIQGLSSWCIENTKKHH |
| 07:10090 19997 NM_028328 Rprd2 Mus_musculus     | KP-GKMAAGGGGGSSKASSSSASSAGALESSLDRKFQSVTNTMESIQGLSSWCIENTKKHH |
| 07:10090 19997 NM_029180 Rprd2 Mus_musculus     | KP-GKMAAGGGGGSSKASSSSASSAGALESSLDRKFQSVTNTMESIQGLSSWCIENTKKHH |
| 08:9031 19997 NM_001012932 RPRD2 Gallus_gallus  | EQGRKMAAGGGGGGRASSAASSSAGALEASLDRKLQAVTNTMESIQGLSSWCLENKRHH   |
| 00:1 Ac-MIVLPAPAAAAAAAAR                        | -----                                                         |
| 01:9606 19997 0#NP_001284602 RPRD2 Homo_sapiens | STIVYHWMKWLRRSAYPHRLNLFYLANDVIQNCKRKNAIIFRESFADVLPEAAALVKDPS  |
| 01:9606 19997 0#NP_001284603 RPRD2 Homo_sapiens | STIVYHWMKWLRRSAYPHRLNLFYLANDVIQNCKRKNAIIFRESFADVLPEAAALVKDPS  |
| 01:9606 19997 0#NP_056018 RPRD2 Homo_sapiens    | STIVYHWMKWLRRSAYPHRLNLFYLANDVIQNCKRKNAIIFRESFADVLPEAAALVKDPS  |
| 01:9606 19997 NM_001297673 RPRD2 Homo_sapiens   | STIVYHWMKWLRRSAYPHRLNLFYLANDVIQNCKRKNAIIFRESFADVLPEAAALVKDPS  |
| 01:9606 19997 NM_001297674 RPRD2 Homo_sapiens   | STIVYHWMKWLRRSAYPHRLNLFYLANDVIQNCKRKNAIIFRESFADVLPEAAALVKDPS  |
| 01:9606 19997 NM_015203 RPRD2 Homo_sapiens      | STIVYHWMKWLRRSAYPHRLNLFYLANDVIQNCKRKNAIIFRESFADVLPEAAALVKDPS  |
| 04:9913 19997 NM_001206187 RPRD2 Bos_taurus     | TTIVYHWMKWLRRSAYPHRLNLFYLANDVIQNCKRKNAIIFRESFADVLPEAAALVKDPS  |
| 07:10090 19997 NM_001081293 Rprd2 Mus_musculus  | STIVYHWMKWLRRTSTYPHRLNLFYLANDVIQNCKRKNAIIFRESFADVLPEAAALVKDPS |
| 07:10090 19997 NM_028328 Rprd2 Mus_musculus     | STIVYHWMKWLRRTSTYPHRLNLFYLANDVIQNCKRKNAIIFRESFADVLPEAAALVKDPS |
| 07:10090 19997 NM_029180 Rprd2 Mus_musculus     | STIVYHWMKWLRSTYPHRLNLFYLANDVIQNCKRKNAIIFRESFADVLPEAAALVKDPS   |
| 08:9031 19997 NM_001012932 RPRD2 Gallus_gallus  | NTIVYHWMKWLRSAFPHRLNLFYLANDVIQNCKRKNAIIVFRDTEAEVLPEAAASLVKDPS |
| 00:1 Ac-MIVLPAPAAAAAAAAR                        | -----                                                         |
| 01:9606 19997 0#NP_001284602 RPRD2 Homo_sapiens | VKSVERIFKIWEDRNVPEEMIVALREALT-----                            |
| 01:9606 19997 0#NP_001284603 RPRD2 Homo_sapiens | VKSVERIFKIWEDRNVPEEMIVALREALT-----                            |
| 01:9606 19997 0#NP_056018 RPRD2 Homo_sapiens    | VKSVERIFKIWEDRNVPEEMIVALREALS-----TTFKTQKQLKE                 |
| 01:9606 19997 NM_001297673 RPRD2 Homo_sapiens   | VKSVERIFKIWEDRNVPEEMIVALREALT-----                            |
| 01:9606 19997 NM_001297674 RPRD2 Homo_sapiens   | VKSVERIFKIWEDRNVPEEMIVALREALT-----                            |
| 01:9606 19997 NM_015203 RPRD2 Homo_sapiens      | VKSVERIFKIWEDRNVPEEMIVALREALS-----TTFKTQKQLKE                 |
| 04:9913 19997 NM_001206187 RPRD2 Bos_taurus     | VKSIERIFKIWEDRNVPEEMIMALREALS-----TTFKTQKQLKE                 |
| 07:10090 19997 NM_001081293 Rprd2 Mus_musculus  | VKSIERIFKIWEDRNVPEDMIVALREALMDRAASHNARLQKLQCFPGTTFKTQKQLKE    |
| 07:10090 19997 NM_028328 Rprd2 Mus_musculus     | VKSIERIFKIWEDRNVPEDMIVALREALS-----TTFKTQKQLKE                 |
| 07:10090 19997 NM_029180 Rprd2 Mus_musculus     | VKSIERIFKIWEDRNVPEDMIVALREALS-----TTFKTQKQLKE                 |
| 08:9031 19997 NM_001012932 RPRD2 Gallus_gallus  | VKSIERIFKIWEDRNVPEETILALKEALS-----TTFKTQKQLKE                 |
| 00:1 Ac-MIVLPAPAAAAAAAAR                        | -----                                                         |
| 01:9606 19997 0#NP_001284602 RPRD2 Homo_sapiens | -----STNPKAALKSKIVAEFRSQALIEELLLYKRSEDQIELKEKQLSTM            |
| 01:9606 19997 0#NP_001284603 RPRD2 Homo_sapiens | -----STNPKAALKSKIVAEFRSQALIEELLLYKRSEDQIELKEKQLSTM            |
| 01:9606 19997 0#NP_056018 RPRD2 Homo_sapiens    | NLNKQPNKQWKKSQTSTNPKAALKSKIVAEFRSQALIEELLLYKRSEDQIELKEKQLSTM  |
| 01:9606 19997 NM_001297673 RPRD2 Homo_sapiens   | -----STNPKAALKSKIVAEFRSQALIEELLLYKRSEDQIELKEKQLSTM            |
| 01:9606 19997 NM_001297674 RPRD2 Homo_sapiens   | -----STNPKAALKSKIVAEFRSQALIEELLLYKRSEDQIELKEKQLSTM            |
| 01:9606 19997 NM_015203 RPRD2 Homo_sapiens      | NLNKQPNKQWKKSQTSTNPKAALKSKIVAEFRSQALIEELLLYKRSEDQIELKEKQLSTM  |
| 04:9913 19997 NM_001206187 RPRD2 Bos_taurus     | NLNKQPNKQWKKSQTSTNPKAALKSKIVAEFRSQALIEELLLYKRSEDQIELKEKQLSTM  |
| 07:10090 19997 NM_001081293 Rprd2 Mus_musculus  | NLNKQPNKQWKKSQTSTNPKAALKSKIVAEFRSQALIEELLMYKRSEDQIELKEKQLSTM  |
| 07:10090 19997 NM_028328 Rprd2 Mus_musculus     | NLNKQPNKQWKKSQTSTNPKAALKSKIVAEFRSQALIEELLMYKRSEDQIELKEKQLSTM  |
| 07:10090 19997 NM_029180 Rprd2 Mus_musculus     | NLNKQPNKQWKKSQTSTNPKAALKSKIVAEFRSQALIEELLMYKRSEDQIELKEKQLSTM  |
| 08:9031 19997 NM_001012932 RPRD2 Gallus_gallus  | TLNKQPNKPWKKSQTSANPKAALKSKIVAEFRPQSLIDELLLYKRSEDQIELKEKQLSTM  |
| 00:1 Ac-MIVLPAPAAAAAAAAR                        | -----                                                         |
| 01:9606 19997 0#NP_001284602 RPRD2 Homo_sapiens | RVDVCSTETLKLCKDKTGGKKFSKEFEEASSKLEEFVNGLDKQVKNGPSLTEALENAGIF  |
| 01:9606 19997 0#NP_001284603 RPRD2 Homo_sapiens | RVDVCSTETLKLCKDKTGGKKFSKEFEEASSKLEEFVNGLDKQVKNGPSLTEALENAGIF  |
| 01:9606 19997 0#NP_056018 RPRD2 Homo_sapiens    | RVDVCSTETLKLCKDKTGGKKFSKEFEEASSKLEEFVNGLDKQVKNGPSLTEALENAGIF  |
| 01:9606 19997 NM_001297673 RPRD2 Homo_sapiens   | RVDVCSTETLKLCKDKTGGKKFSKEFEEASSKLEEFVNGLDKQVKNGPSLTEALENAGIF  |
| 01:9606 19997 NM_001297674 RPRD2 Homo_sapiens   | RVDVCSTETLKLCKDKTGGKKFSKEFEEASSKLEEFVNGLDKQVKNGPSLTEALENAGIF  |
| 01:9606 19997 NM_015203 RPRD2 Homo_sapiens      | RVDVCSTETLKLCKDKTGGKKFSKEFEEASSKLEEFVNGLDKQVKNGPSLTEALENAGIF  |
| 04:9913 19997 NM_001206187 RPRD2 Bos_taurus     | RVDVCSTETLKLCKDKTGGKKFSKEFEEASAKLEEFVNGLDKQVKNGPSLTEALENAGIF  |
| 07:10090 19997 NM_001081293 Rprd2 Mus_musculus  | RVDVCSTETLKLCKDKTGGKKFSKEFEEASSKLEEFVNGLDKQVKNGPSLTEALENAGIF  |
| 07:10090 19997 NM_028328 Rprd2 Mus_musculus     | RVDVCSTETLKLCKDKTGGKKFSKEFEEASSQLEEFVNGLDKQVKNGPSLTEALENAGIF  |
| 07:10090 19997 NM_029180 Rprd2 Mus_musculus     | RVDVCSTETLKLCKGNTHI--FSRKIAQCFLSL-IFV-----                    |
| 08:9031 19997 NM_001012932 RPRD2 Gallus_gallus  | RVDVCSTETLKLCKDKTGGKKFSKEFEEASSKLEEFVNGLDKQVKNGPSLTEALENAGIF  |

00:1 | AC-MIVLPAPAAAAAAAR

-----

01:9606|19997|0#NP\_001284602|RPRD2|Homo\_sapiens  
01:9606|19997|0#NP\_001284603|RPRD2|Homo\_sapiens  
01:9606|19997|0#NP\_056018|RPRD2|Homo\_sapiens  
01:9606|19997|NM\_001297673|RPRD2|Homo\_sapiens  
01:9606|19997|NM\_001297674|RPRD2|Homo\_sapiens  
01:9606|19997|NM\_015203|RPRD2|Homo\_sapiens  
04:9913|19997|NM\_001206187|RPRD2|Bos\_taurus  
07:10090|19997|NM\_001081293|Rprd2|Mus\_musculus  
07:10090|19997|NM\_028328|Rprd2|Mus\_musculus  
07:10090|19997|NM\_029180|Rprd2|Mus\_musculus  
08:9031|19997|NM\_001012932|RPRD2|Gallus\_gallus

00:1|Ac-MIVLPAPAAAAAAAAR  
01:9606|19997|0#NP\_001284602|RPRD2|Homo\_sapiens  
01:9606|19997|0#NP\_001284603|RPRD2|Homo\_sapiens  
01:9606|19997|0#NP\_056018|RPRD2|Homo\_sapiens  
01:9606|19997|NM\_001297673|RPRD2|Homo\_sapiens  
01:9606|19997|NM\_001297674|RPRD2|Homo\_sapiens  
01:9606|19997|NM\_015203|RPRD2|Homo\_sapiens  
04:9913|19997|NM\_001206187|RPRD2|Bos\_taurus  
07:10090|19997|NM\_001081293|Rprd2|Mus\_musculus  
07:10090|19997|NM\_028328|Rprd2|Mus\_musculus  
07:10090|19997|NM\_029180|Rprd2|Mus\_musculus  
08:9031|19997|NM\_001012932|RPRD2|Gallus\_gallus

00:1|Ac-MIVLPAPAAAAAAAAR  
01:9606|19997|0#NP\_001284602|RPRD2|Homo\_sapiens  
01:9606|19997|0#NP\_001284603|RPRD2|Homo\_sapiens  
01:9606|19997|0#NP\_056018|RPRD2|Homo\_sapiens  
01:9606|19997|NM\_001297673|RPRD2|Homo\_sapiens  
01:9606|19997|NM\_001297674|RPRD2|Homo\_sapiens  
01:9606|19997|NM\_015203|RPRD2|Homo\_sapiens  
04:9913|19997|NM\_001206187|RPRD2|Bos\_taurus  
07:10090|19997|NM\_001081293|Rprd2|Mus\_musculus  
07:10090|19997|NM\_028328|Rprd2|Mus\_musculus  
07:10090|19997|NM\_029180|Rprd2|Mus\_musculus  
08:9031|19997|NM\_001012932|RPRD2|Gallus\_gallus

00:1|Ac-MIVLPAPAAAAAAAAR  
01:9606|19997|0#NP\_001284602|RPRD2|Homo\_sapiens  
01:9606|19997|0#NP\_001284603|RPRD2|Homo\_sapiens  
01:9606|19997|0#NP\_056018|RPRD2|Homo\_sapiens  
01:9606|19997|NM\_001297673|RPRD2|Homo\_sapiens  
01:9606|19997|NM\_001297674|RPRD2|Homo\_sapiens  
01:9606|19997|NM\_015203|RPRD2|Homo\_sapiens  
04:9913|19997|NM\_001206187|RPRD2|Bos\_taurus  
07:10090|19997|NM\_001081293|Rprd2|Mus\_musculus  
07:10090|19997|NM\_028328|Rprd2|Mus\_musculus  
07:10090|19997|NM\_029180|Rprd2|Mus\_musculus  
08:9031|19997|NM\_001012932|RPRD2|Gallus\_gallus

00:1|Ac-MIVLPAPAAAAAAAAR  
01:9606|19997|0#NP\_001284602|RPRD2|Homo\_sapiens  
01:9606|19997|0#NP\_001284603|RPRD2|Homo\_sapiens  
01:9606|19997|0#NP\_056018|RPRD2|Homo\_sapiens  
01:9606|19997|NM\_001297673|RPRD2|Homo\_sapiens  
01:9606|19997|NM\_001297674|RPRD2|Homo\_sapiens  
01:9606|19997|NM\_015203|RPRD2|Homo\_sapiens  
04:9913|19997|NM\_001206187|RPRD2|Bos\_taurus  
07:10090|19997|NM\_001081293|Rprd2|Mus\_musculus  
07:10090|19997|NM\_028328|Rprd2|Mus\_musculus  
07:10090|19997|NM\_029180|Rprd2|Mus\_musculus  
08:9031|19997|NM\_001012932|RPRD2|Gallus\_gallus

00:1|Ac-MIVLPAPAAAAAAAAR  
01:9606|19997|0#NP\_001284602|RPRD2|Homo\_sapiens  
01:9606|19997|0#NP\_001284603|RPRD2|Homo\_sapiens  
01:9606|19997|0#NP\_056018|RPRD2|Homo\_sapiens  
01:9606|19997|NM\_001297673|RPRD2|Homo\_sapiens  
01:9606|19997|NM\_001297674|RPRD2|Homo\_sapiens  
01:9606|19997|NM\_015203|RPRD2|Homo\_sapiens  
04:9913|19997|NM\_001206187|RPRD2|Bos\_taurus  
07:10090|19997|NM\_001081293|Rprd2|Mus\_musculus  
07:10090|19997|NM\_028328|Rprd2|Mus\_musculus  
07:10090|19997|NM\_029180|Rprd2|Mus\_musculus  
08:9031|19997|NM\_001012932|RPRD2|Gallus\_gallus

00:1|Ac-MIVLPAPAAAAAAAAR  
01:9606|19997|0#NP\_001284602|RPRD2|Homo\_sapiens  
01:9606|19997|0#NP\_001284603|RPRD2|Homo\_sapiens

SLGFTATHNTSPAAP-PTEVTICQSSEVSKPKLESESTSPSLEMKIHNFLLKGNPGFSGLN  
SLGFTATHNTSPAAP-PTEVTICQSSEVSKPKLESESTSPSLEMKIHNFLLKGNPGFSGLN  
SLGFTATHNTSPAAP-PTEVTICQSSEVSKPKLESESTSPSLEMKIHNFLLKGNPGFSGLN  
SLGFTATHNTSPAAP-PTEVTICQSSEVSKPKLESESTSPSLEMKIHNFLLKGNPGFSGLN  
SLGFTATHNTSPAAP-PTEVTICQSSEVSKPKLESESTSPSLEMKIHNFLLKGNPGFSGLN  
TLGFTGNHNSAPPAAP-PTEVAVMCQSSEASKPKLESESTSPSLEMKIHNFLLKGNPGFSGLN  
SLGFTGTHNPSPAAP-PTEVAVCQSSEVSKPKPESESTSPSLEMKIHNFLLKGNPGFSGLN  
-----  
SLGFSSSHPPSSSSLLTTDASMSQSSEISKAKLESEPPSPSLEMKIHNFLLKGNPGFSGLN

-----  
LNIPILSSSLGSSAPSESHPSDFQRGPTSTSIDNIDGTPVRDERSGTPQTQDEMMDKPTSSS  
LNIPILSSSLGSSAPSESHPSDFQRGPTSTSIDNIDGTPVRDERSGTPQTQDEMMDKPTSSS  
LNIPILSSSLGSSAPSESHPSDFQRGPTSTSIDNIDGTPVRDERSGTPQTQDEMMDKPTSSS  
LNIPILSSSLGSSAPSESHPSDFQRGPTSTSIDNIDGTPVRDERSGTPQTQDEMMDKPTSSS  
LNIPILSSSLGSSAPSESHPSDFQRGPTSTSIDNIDGTPVRDERSGTPQTQDEMMDKPTSSS  
LNIPILSSSLGSSAPSESHPSDFQRGPTSTSIDNIDGTPVRDERSGTPQTQDEMMDKPTSSS  
LNIPILSSSLGSSAPSESHPSDFQRGPTSTSIDNIDGTPVRDERSGTPQTQDEMMDKPTSSS  
LNIPILSSSLGSSAPSESHPSDFQRGPTSTSIDNIDGTPVRDERSGTPQTQDEMMDKPTSSS  
LNIPILSSSLGSSAPSEGHASDFQRGPTSTSVDSIDGTPVRDERSGTPQTQDEMMDKPTSSS  
-----  
LNIPILSSSLGSNIAPESSHSDFQRGPTSTSMDNVDGTPVRDERSGTPQTQDEMMDKPTSSN

-----  
VDTMSLLSKIISPGSSTPSSTRSPPPGRDESYPRELSNSVSTYRPFGLGSESP---YKQP  
-----  
VDTISLLSKIMSPGSSTPSSTRSPLQSRDDGYPQELPNSVHTYRPFSLGRDSPAGMYKQS

-----  
SDGMERPSSSLMDSSQEKFYPDTSFQEEDEDYRDFEYSGPPPSAMMNLEKKPAKSILKSSKL  
SDGMERPSSSLMDSSQEKFYPDTSFQEEDEDYRDFEYSGPPPSAMMNLEKKPAKSILKSSKL  
SDGMERPSSSLMDSSQEKFYPDTSFQEEDEDYRDFEYSGPPPSAMMNLEKKPAKSILKSSKL  
SDGMERPSSSLMDSSQEKFYPDTSFQEEDEDYRDFEYSGPPPSAMMNLEKKPAKSILKSSKL  
SDGMERPSSSLMDSSQEKFYPDTSFQEEDEDYRDFEYSGPPPSAMMNLEKKPAKSILKSSKL  
SDGMERPSSSLMDSSQEKFYPDTSFQEEDEDYRDFEYSGPPPSAMMNLEKKPAKSILKSSKL  
SDGMERPSSSLMDSSQEKFYPDTSFQEEDEDYRDFEYSGPPPSAMMNLEKKPAKSILKSSKL  
SDGMERPSSSLMDSSQEKFYPDTSFQEEDEDYRDFEYSGPPPSAMMNLEKKPAKSILKSSKL  
SGGVERPSSSLMDSSQEKLFPDTSFQEEDEDYRDFEYSGPPPSAMMNLEKKPAKSILKSSKL  
-----  
ADSMEIPSSSLMDSSQEKFYPDTSFQEEDEDYRDFEYSGPPPSAMNLEKKPAKSILKSSKL

-----  
SDTTEYQPILSSSYSHRAQEFVGKSAFPPSVRALLDSSENCDRLSSSPGLFGAFSVRGNEP  
SDTTEYQPILSSSYSHRAQEFVGKSAFPPSVRALLDSSENCDRLSSSPGLFGAFSVRGNEP  
SDTTEYQPILSSSYSHRAQEFVGKSAFPPSVRALLDSSENCDRLSSSPGLFGAFSVRGNEP  
SDTTEYQPILSSSYSHRAQEFVGKSAFPPSVRALLDSSENCDRLSSSPGLFGAFSVRGNEP  
SDTTEYQPILSSSYSHRAQEFVGKSAFPPSVRALLDSSENCDRLSSSPGLFGAFSVRGNEP  
SDTTEYQPILSSSYSHRAQEFVGKSAFPPSVRALLDSSENCGRLSPPGLGFAFVVRGNEP  
SDATEYQPILSSYNHRAQEFVGKSAFPPSVRALLDSSENCDRLSSPPGLGFAFNIRGNEP  
-----  
SEGAEYQPVLPYSYQORSQDFSVKSSFPQSMRSLDQSESCDTLSTSPGMYGSYSLRGNDS

-----  
GSDRSPSPKHPCRSHGSPTHVRRGESPLHHFHHVD---D-----  
GSDRSPSPSKNDSFFTTPDSNHNLSQSSTTGHLNLSLPQKQYDPSPHVPVHRSILFSPQNTLAA  
GSDRSPSPSKNDSFFTTPDSNHNLSQSSTTGHLNLSLPQKQYDPSPHVPVHRSILFSPQNTLAA  
GSDRSPSPKHPCRSHGSPTHVRRGESPLHHFHHVD---D-----  
GSDRSPSPSKNDSFFTTPDSNHNLSQSSTTGHLNLSLPQKQYDPSPHVPVHRSILFSPQNTLAA  
GSDRSPSPSKNDSFFTTPDSNHNLSQSSTTGHLNLSLPQKQYDPSPHVPVHRSILFSPQNTLAA  
GSDRSPSPSKNDSFFTTPDSNHNLSQSSTAGHLTLPLQKQYDPSPHVPVHRSILFSSQSTLAA  
GSERSPSPSKNDAFFTTPDSNHNLSQSSTAGHLTLPLQKQYDPSPHVPVHRSILFSSQSTLAA  
-----  
TSDGSPSPSKNDVFFTTPDSNHNLPKPV-VHSGLSQKQYDPSPHSIPHRSILFSSQSTLPN

-----  
PTGHPTSGVEKVLASTISTTSTIEFKNMLKNASRKPSDDKHFGQAPSKGTPSDGVSLSN

01:9606|19997|0#NP\_056018|RPRD2|Homo\_sapiens  
01:9606|19997|NM\_001297673|RPRD2|Homo\_sapiens  
01:9606|19997|NM\_001297674|RPRD2|Homo\_sapiens  
01:9606|19997|NM\_015203|RPRD2|Homo\_sapiens  
04:9913|19997|NM\_001206187|RPRD2|Bos\_taurus  
07:10090|19997|NM\_001081293|Rprd2|Mus\_musculus  
07:10090|19997|NM\_028328|Rprd2|Mus\_musculus  
07:10090|19997|NM\_029180|Rprd2|Mus\_musculus  
08:9031|19997|NM\_001012932|RPRD2|Gallus\_gallus

00:1|Ac-MIVLPAPAAAAAAAAR  
01:9606|19997|0#NP\_001284602|RPRD2|Homo\_sapiens  
01:9606|19997|0#NP\_001284603|RPRD2|Homo\_sapiens  
01:9606|19997|0#NP\_056018|RPRD2|Homo\_sapiens  
01:9606|19997|NM\_001297673|RPRD2|Homo\_sapiens  
01:9606|19997|NM\_001297674|RPRD2|Homo\_sapiens  
01:9606|19997|NM\_015203|RPRD2|Homo\_sapiens  
04:9913|19997|NM\_001206187|RPRD2|Bos\_taurus  
07:10090|19997|NM\_001081293|Rprd2|Mus\_musculus  
07:10090|19997|NM\_028328|Rprd2|Mus\_musculus  
07:10090|19997|NM\_029180|Rprd2|Mus\_musculus  
08:9031|19997|NM\_001012932|RPRD2|Gallus\_gallus

00:1|Ac-MIVLPAPAAAAAAAAR  
01:9606|19997|0#NP\_001284602|RPRD2|Homo\_sapiens  
01:9606|19997|0#NP\_001284603|RPRD2|Homo\_sapiens  
01:9606|19997|0#NP\_056018|RPRD2|Homo\_sapiens  
01:9606|19997|NM\_001297673|RPRD2|Homo\_sapiens  
01:9606|19997|NM\_001297674|RPRD2|Homo\_sapiens  
01:9606|19997|NM\_015203|RPRD2|Homo\_sapiens  
04:9913|19997|NM\_001206187|RPRD2|Bos\_taurus  
07:10090|19997|NM\_001081293|Rprd2|Mus\_musculus  
07:10090|19997|NM\_028328|Rprd2|Mus\_musculus  
07:10090|19997|NM\_029180|Rprd2|Mus\_musculus  
08:9031|19997|NM\_001012932|RPRD2|Gallus\_gallus

00:1|Ac-MIVLPAPAAAAAAAAR  
01:9606|19997|0#NP\_001284602|RPRD2|Homo\_sapiens  
01:9606|19997|0#NP\_001284603|RPRD2|Homo\_sapiens  
01:9606|19997|0#NP\_056018|RPRD2|Homo\_sapiens  
01:9606|19997|NM\_001297673|RPRD2|Homo\_sapiens  
01:9606|19997|NM\_001297674|RPRD2|Homo\_sapiens  
01:9606|19997|NM\_015203|RPRD2|Homo\_sapiens  
04:9913|19997|NM\_001206187|RPRD2|Bos\_taurus  
07:10090|19997|NM\_001081293|Rprd2|Mus\_musculus  
07:10090|19997|NM\_028328|Rprd2|Mus\_musculus  
07:10090|19997|NM\_029180|Rprd2|Mus\_musculus  
08:9031|19997|NM\_001012932|RPRD2|Gallus\_gallus

00:1|Ac-MIVLPAPAAAAAAAAR  
01:9606|19997|0#NP\_001284602|RPRD2|Homo\_sapiens  
01:9606|19997|0#NP\_001284603|RPRD2|Homo\_sapiens  
01:9606|19997|0#NP\_056018|RPRD2|Homo\_sapiens  
01:9606|19997|NM\_001297673|RPRD2|Homo\_sapiens  
01:9606|19997|NM\_001297674|RPRD2|Homo\_sapiens  
01:9606|19997|NM\_015203|RPRD2|Homo\_sapiens  
04:9913|19997|NM\_001206187|RPRD2|Bos\_taurus  
07:10090|19997|NM\_001081293|Rprd2|Mus\_musculus  
07:10090|19997|NM\_028328|Rprd2|Mus\_musculus  
07:10090|19997|NM\_029180|Rprd2|Mus\_musculus  
08:9031|19997|NM\_001012932|RPRD2|Gallus\_gallus

00:1|Ac-MIVLPAPAAAAAAAAR  
01:9606|19997|0#NP\_001284602|RPRD2|Homo\_sapiens  
01:9606|19997|0#NP\_001284603|RPRD2|Homo\_sapiens  
01:9606|19997|0#NP\_056018|RPRD2|Homo\_sapiens  
01:9606|19997|NM\_001297673|RPRD2|Homo\_sapiens  
01:9606|19997|NM\_001297674|RPRD2|Homo\_sapiens  
01:9606|19997|NM\_015203|RPRD2|Homo\_sapiens  
04:9913|19997|NM\_001206187|RPRD2|Bos\_taurus  
07:10090|19997|NM\_001081293|Rprd2|Mus\_musculus  
07:10090|19997|NM\_028328|Rprd2|Mus\_musculus  
07:10090|19997|NM\_029180|Rprd2|Mus\_musculus  
08:9031|19997|NM\_001012932|RPRD2|Gallus\_gallus

00:1|Ac-MIVLPAPAAAAAAAAR  
01:9606|19997|0#NP\_001284602|RPRD2|Homo\_sapiens  
01:9606|19997|0#NP\_001284603|RPRD2|Homo\_sapiens  
01:9606|19997|0#NP\_056018|RPRD2|Homo\_sapiens  
01:9606|19997|NM\_001297673|RPRD2|Homo\_sapiens

PTGHPPTSGVEKVLASTISTTSTIEFKNMLKNASRKPSDDKHFGQAPSKGTPSDGVSLSN  
-----  
PTGHPPTSGVEKVLASTISTTSTIEFKNMLKNASRKPSDDKHFGQAPSKGTPSDGVSLSN  
PTGHPPTSGVEKVLASTISTTSTIEFKNMLKNASRKPSDDKHFGQAPSKGTPSDGVSLSN  
PAGHPPTSGVEKVLASTISTTSTIEFKNMLKNASRKPSDDKHFGQTPNKGTSDDGVSLSN  
-----  
-----  
PAGRPPAPGVDKSLGSSISATSTMEFKNMLKNASRKPSSEKHFQIS-KGSSNEGVGHSQ

-----  
-----  
LTQPSLT---ATDQQQQEEHYRIETRVSSSCLDLPDSTEKGAPIETLGYHSASNRMSG  
LTQPSLT---ATDQQQQEEHYRIETRVSSSCLDLPDSTEKGAPIETLGYHSASNRMSG  
-----  
LTQPSLT---ATDQQQQEEHYRIETRVSSSCLDLPDSTEKGAPIETLGYHSASNRMSG  
LTQPSLT---ATDQQQQEEHYRIETRVSSSCLDLPDSTEKGAPIETLGYHSASNRMSG  
LAQLSLT---AADQQQQEEHYRIETRVSSSCLDLPDSTEKGAPIETLGYHNASSRRMSG  
LTQPS---LPTTQQQQEEHYRIETRVSSSCLDLPDSTEKGAPIETLGYHNAANRRMSG  
-----  
AGAPKGEQQQQQQQQEEHYRIETRVSSSCLDLPDSTEKGAPIETLGYHNASSRGMMSG

-----  
-----  
EPIQTVESIRVPGKGNRGHGREASRVGWFDLSTSGSSFNDNGPSSASELASLGGGGSGGLT  
EPIQTVESIRVPGKGNRGHGREASRVGWFDLSTSGSSFNDNGPSSASELASLGGGGSGGLT  
-----  
EPIQTVESIRVPGKGNRGHGREASRVGWFDLSTSGSSFNDNGPSSASELASLGGGGSGGLT  
EPIQTVESIRVPGKGNRGHGREASRVGWFDLSTSGSSFNDNGPSSASELASLGGGGSGGLT  
EPIQTVESIRVPGKGNRGHGREASRVGWFDLSTSGSSFNDNGPSSASELASLGGGGSGGLT  
EPIKTVESIRVPGKGNRGHGREVSRVGFIDLSTPGSSFNDNGPSSASELASLGGGGSGGLT  
-----  
-----  
EPIQTVESIRVLGKSGRHGREASRSGWFEISNTGSAFNDNGPSSASELPGMGGF-----

-----  
-----  
GFKTAPYKERAPQFQESVGSFRSNSFNSTFEHHLPP---SPLEHGTFFQREPVGPSAP  
GFKTAPYKERAPQFQESVGSFRSNSFNSTFEHHLPP---SPLEHGTFFQREPVGPSAP  
-----  
GFKTAPYKERAPQFQESVGSFRSNSFNSTFEHHLPP---SPLEHGTFFQREPVGPSAP  
GFKTAPYKERAPQFQESVGSFRSNSFNSTFEHHLPP---SPLEHGTFFQREPVGPSAP  
GFKTAPYKERAPQFQESVGSFRSNSFNSTFEHHLPP---SPLDHGTFFQREPVGPSAP  
GFKTTPYKERAPQFQESVTSFRSNSFNSTFEHHLPP---SPLEHGAPFQREPVGPSAP  
-----  
---QAQYKERVPPFQESVNNFRTNNFSPAFDHMPPIIAPPPMEHGTFFPRDPVGPAPAG

-----  
-----  
P-VPPKDHGGIFSRD--APTHLPSVDLSNPFTKEA---ALAHAAPPPPPGEHSGIPFFT  
P-VPPKDHGGIFSRD--APTHLPSVDLSNPFTKEA---ALAHAAPPPPPGEHSGIPFFT  
-----  
P-VPPKDHGGIFSRD--APTHLPSVDLSNPFTKEA---ALAHAAPPPPPGEHSGIPFFT  
P-VPPKDHGGIFSRD--APTHLPSVDLSNPFTKEA---ALAHAAPPPPPGEHSGIPFFT  
P-APPKDHGGIFSRD--APTHLPSVDLSNPFAKEA---ALTHAAP--PPGEHGGVPFFT  
P-APPKDHGGIFSRE--APTHLPSVDLSNPFTKEA---SLAHAGPPPPGEHSGVPFFP  
-----  
PAAPPKDHGSLFPRDHSVPPHMPVDHANPFSKETSSPLSLPHGVPPPTVEHTGVPPFT

-----  
-----  
PPPPPPGEHSSSGSGVPFSTPPPPPPVDHSGVVPFPAPPLAEHGVAGAVAVFPKDHS  
PPPPPPGEHSSSGSGVPFSTPPPPPPVDHSGVVPFPAPPLAEHGVAGAVAVFPKDHS  
-----  
PPPPPPGEHSSSGSGVPFSTPPPPPPVDHSGVVPFPAPPLAEHGVAGAVAVFPKDHS  
PPPPPPGEHSSSGSGVPFSTPPPPPPVDHSGVVPFPAPPLAEHGVAGAVAVFPKDHS  
PPPPPPGEHSSSGSGVPFSAAPPPPPPGDHSGVVPFFTTPPLAEHGVAGAVAVFPKDHS  
PPPPPPGELS--SGGTGVPFATPAPPPPPVDHSGVVPFFTTPPLEHGVGTGAVSVFPKDHS  
-----  
-----  
PPPPVPGEH----AGVPFPS---QPPPAGEHGGVPFPAPPLTV---EHGGSAPFKEHG

-----  
-----  
SLLQGTLAEHFGVLPGRDHGGPTQRDLNGPGLSRVRESLTLPSHSLEHLGPPHGGGGGG  
SLLQGTLAEHFGVLPGRDHGGPTQRDLNGPGLSRVRESLTLPSHSLEHLGPPHGGGGGG  
-----

```
00:01|Ac-MIVLPAPAAAAAAR
01:9606|19997|0#NP_001284602|RPRD2|Homo_sapiens
01:9606|19997|0#NP_001284603|RPRD2|Homo_sapiens
01:9606|19997|0#NP_056018|RPRD2|Homo_sapiens
01:9606|19997|NM_001297673|RPRD2|Homo_sapiens
01:9606|19997|NM_001297674|RPRD2|Homo_sapiens
01:9606|19997|NM_015203|RPRD2|Homo_sapiens
04:9913|19997|NM_001206187|RPRD2|Bos_taurus
07:10090|19997|NM_001081293|Rprd2|Mus_musculus
07:10090|19997|NM_028328|Rprd2|Mus_musculus
07:10090|19997|NM_029180|Rprd2|Mus_musculus
08:9031|19997|NM_001012932|RPRD2|Gallus_gallus
```

```

-----
GNSNSSGPPLGPSHRDTISRSGIILRSPRPDFRPREFFLSRDPFHSLKRPRPPFARGPPF
GNSNSSGPPLGPSHRDTISRSGIILRSPRPDFRPREFFLSRDPFHSLKRPRPPFARGPPF
-----
GNSNSSGPPLGPSHRDTISRSGIILRSPRPDFRPREFFLSRDPFHSLKRPRPPFARGPPF
GNSNSSGPPLGPSHRDTISRSGIILRSPRPDFRPREFFLSRDPFHSLKRPRPPFARGPPF
GNSNSSGPPLGPSHRDAINRSGMILRSPRPDFRPREFFLSRDPFHSLKRPRPPFARGPPF
GNTSSSGLPLSPAHRDAIGRSGMILRSPRPDFRPREAFLGRDPFHSLKRPRPPFVRGPPF
-----
--TRSVTPIGPAHRDGANRGGMMVRTPRADFRRPREFFMNRDPFHSPEEAADFRKGFPF

```

-----  
FAPKRPFPPPRY-----  
FAPKRPFPPPRY-----  
-----  
FAPKRPFPPPRY-----  
FAPKRPFPPPRY-----  
FAPKRPFPPPRY-----  
FAPKRPFPPPRY-----  
-----  
LCTKTPLLPQVLKQTPIS

***FXR2***

Ac-AETKAAAADGERPGPGPLL VGCGR

CLUSTAL O(1.2.1) multiple sequence alignment

|                                                    |                                                                |
|----------------------------------------------------|----------------------------------------------------------------|
| 00:1 Ac-AETKAAAADGERPGPGPLLVGCGR                   | -----AETKA---AAA                                               |
| 01:9606 21014 0#NP_004851 FXR2 Homo_sapiens        | -----                                                          |
| 01:9606 21014 NM_004860 FXR2 Homo_sapiens          | RRRRWQGEVEAVERQRRQVRPGLRQQRGRRRAEAEVTKAAAA-AAVSLTVAETKA---AAA  |
| 03:9544 21014 NM_001266676 FXR2 Macaca_mulatta     | -----                                                          |
| 04:9913 21014 NM_001206289 FXR2 Bos_taurus         | -----RQRQQWVPLRLRQGRRRRAEAEVTKAAAA-AAVFLTVAETKA---AAA          |
| 06:10116 21014 NM_001100647 Fxr2 Rattus_norvegicus | -----                                                          |
| 07:10090 21014 NM_011814 Fxr2 Mus_musculus         | -----EVEAV--ERQRRVPGPRQQRGRRRRAEAEVTKAAAAAAVSLTVAETKAAAAAA     |
| 10:7955 21014 NM_200211 fxr2 Danio_rerio           | -----                                                          |
| 00:1 Ac-AETKAAAADGERPGPGPLLVGCGR                   | DGERPGPGPLLVGCGR-----                                          |
| 01:9606 21014 0#NP_004851 FXR2 Homo_sapiens        | -----                                                          |
| 01:9606 21014 NM_004860 FXR2 Homo_sapiens          | DGERPGPGPLLVGCGRAAVGPARLPPPAAPPPAPPPGRRRGPGPARTQTAAAAAAGGVGG   |
| 03:9544 21014 NM_001266676 FXR2 Macaca_mulatta     | -----GGAAVGPARLPPPAAPPPAPPPGRRRGPGPARTQTAAAAAAGGVGG            |
| 04:9913 21014 NM_001206289 FXR2 Bos_taurus         | DGERPGPGPLLVGCGRAAVGPARLPPPAAPPPAPPPGRRRGPGPARTQSAAAAAAGGVGG   |
| 06:10116 21014 NM_001100647 Fxr2 Rattus_norvegicus | -----GG                                                        |
| 07:10090 21014 NM_011814 Fxr2 Mus_musculus         | DGERPGPGPLLVGCSRAAVGPARLPPPAAPPPAPPPGRRRGPGPARTQGSVSAAGPVGG    |
| 10:7955 21014 NM_200211 fxr2 Danio_rerio           | -----PDSHAIVAPKERHS---                                         |
| 00:1 Ac-AETKAAAADGERPGPGPLLVGCGR                   | -----                                                          |
| 01:9606 21014 0#NP_004851 FXR2 Homo_sapiens        | ----MGGLASGGDVEPGLPVEVRGSGNAFYKGFVKDVHEDSVTIFFENNWQSERQIPFGD   |
| 01:9606 21014 NM_004860 FXR2 Homo_sapiens          | GGGAMGGLASGGDVEPGLPVEVRGSGNAFYKGFVKDVHEDSVTIFFENNWQSERQIPFGD   |
| 03:9544 21014 NM_001266676 FXR2 Macaca_mulatta     | GGGAMGGLASGGDVEPGLPVEVRGSGNAFYKGFVKDVHEDSVTIFFENNWQSERQIPFGD   |
| 04:9913 21014 NM_001206289 FXR2 Bos_taurus         | GGGAMGGLASGGDVEPGLPVEVRGSGNAFYKGFVKDVHEDSVTIFFENNWQSERQIPFGD   |
| 06:10116 21014 NM_001100647 Fxr2 Rattus_norvegicus | GGGAMGGLASGGDVEPGLPVEVRGSGNAFYKGFVKDVHEDSVTIFFENNWQSERQIPFGD   |
| 07:10090 21014 NM_011814 Fxr2 Mus_musculus         | GGGAMGGLASGGDVEPGLPVEVRGSGNAFYKGFVKDVHEDSVTIFFENNWQSERQIPFGD   |
| 10:7955 21014 NM_200211 fxr2 Danio_rerio           | -----RGEATTNMDGLAVEVRGSGNAFYKGF IKDVHEDSLTIVFENNWQPERQLPFSD    |
| 00:1 Ac-AETKAAAADGERPGPGPLLVGCGR                   | -----                                                          |
| 01:9606 21014 0#NP_004851 FXR2 Homo_sapiens        | VRLPPPADYNKEITEGDEVEVYSRANEQEPCGWWLARVRMMKGDFYVIEYAACDATYNEI   |
| 01:9606 21014 NM_004860 FXR2 Homo_sapiens          | VRLPPPADYNKEITEGDEVEVYSRANEQEPCGWWLARVRMMKGDFYVIEYAACDATYNEI   |
| 03:9544 21014 NM_001266676 FXR2 Macaca_mulatta     | VRLPPPADYNKEITEGDEVEVYSRANEQEPCGWWLARVRMMKGDFYVIEYAACDATYNEI   |
| 04:9913 21014 NM_001206289 FXR2 Bos_taurus         | VRLPPPADYNKEITEGDEVEVYSRANEQEPCGWWLARVRMMKGDFYVIEYAACDATYNEI   |
| 06:10116 21014 NM_001100647 Fxr2 Rattus_norvegicus | VRLPPPADYNKEITEGDEVEVYSRANEQEPCGWWLARVRMMKGDFYVIEYAACDATYNEI   |
| 07:10090 21014 NM_011814 Fxr2 Mus_musculus         | VRLPPPADYNKEITEGDEVEVYSRANEQEPCGWWLARVRMMKGDFYVIEYAACDATYNEI   |
| 10:7955 21014 NM_200211 fxr2 Danio_rerio           | VRLPPPTDYHKDICEGDEVEVYSRANEQEPCGWWLARVRMMKGDFYVIEYAACDATYNEI   |
| 00:1 Ac-AETKAAAADGERPGPGPLLVGCGR                   | -----                                                          |
| 01:9606 21014 0#NP_004851 FXR2 Homo_sapiens        | VTLERLRPVNPNPLATKGSFFKVTMAVPEDLREACSNENVHKEFKKALGANCIFLNITNS   |
| 01:9606 21014 NM_004860 FXR2 Homo_sapiens          | VTLERLRPVNPNPLATKGSFFKVTMAVPEDLREACSNENVHKEFKKALGANCIFLNITNS   |
| 03:9544 21014 NM_001266676 FXR2 Macaca_mulatta     | VTLERLRPVNPNPLATKGSFFKVTMAVPEDLREACSNENVHKEFKKALGANCIFLNITNS   |
| 04:9913 21014 NM_001206289 FXR2 Bos_taurus         | VTLERLRPVNPNPLATKGSFFKVTMAVPEDLREACSNENVHKEFKKALGANCIFLNITNS   |
| 06:10116 21014 NM_001100647 Fxr2 Rattus_norvegicus | VTLERLRPVNPNPLATKGSFFKVTMAVPEDLREACSNENVHKEFKKALGANCIFLNITNS   |
| 07:10090 21014 NM_011814 Fxr2 Mus_musculus         | VTLERLRPVNPNPLATKGSFFKVTMAVPEDLREACSNENVHKEFKKALGANCIFLNITNS   |
| 10:7955 21014 NM_200211 fxr2 Danio_rerio           | VTSERIRPVNPNSPSAQNSFYKVPIAVPEDLRDICTENIHKDFRKAIGANCIFYNTSTH    |
| 00:1 Ac-AETKAAAADGERPGPGPLLVGCGR                   | -----                                                          |
| 01:9606 21014 0#NP_004851 FXR2 Homo_sapiens        | ELFILSTTEAPVKRASLLGDMHFRSLRTKLLMSRNEEATKHLET SKQLAAAFQEEFTVR   |
| 01:9606 21014 NM_004860 FXR2 Homo_sapiens          | ELFILSTTEAPVKRASLLGDMHFRSLRTKLLMSRNEEATKHLET SKQLAAAFQEEFTVR   |
| 03:9544 21014 NM_001266676 FXR2 Macaca_mulatta     | ELFILSTTEAPVKRASLLGDMHFRSLRTKLLMSRNEEATKHLET SKQLAAAFQEEFTVR   |
| 04:9913 21014 NM_001206289 FXR2 Bos_taurus         | ELFILSTTEAPVKRASLLGDMHFRSLRTKLLMSRNEEATKHLET SKQLAAAFQEEFTVR   |
| 06:10116 21014 NM_001100647 Fxr2 Rattus_norvegicus | ELFILSTTEAPVKRASLLGDMHFRSLRTKLLMSRNEEATKHLET SKQLAAAFQEEFTVR   |
| 07:10090 21014 NM_011814 Fxr2 Mus_musculus         | ELFILSTTEAPVKRASLLGDMHFRSLRTKLLMSRNEEATKHLET SKQLAAAFQEEFTVR   |
| 10:7955 21014 NM_200211 fxr2 Danio_rerio           | QLIVLSTNES TVKRAGLLSDMHFRSIRTKLMLMSRNEEATKHLET SKQLASAYQEEVKVR |
| 00:1 Ac-AETKAAAADGERPGPGPLLVGCGR                   | -----                                                          |
| 01:9606 21014 0#NP_004851 FXR2 Homo_sapiens        | EDLMGLAIGTHGANIQQARKVPGVTAIELGEETCTFRIYGETPEACRQARSYLEFSEDSV   |
| 01:9606 21014 NM_004860 FXR2 Homo_sapiens          | EDLMGLAIGTHGANIQQARKVPGVTAIELGEETCTFRIYGETPEACRQARSYLEFSEDSV   |
| 03:9544 21014 NM_001266676 FXR2 Macaca_mulatta     | EDLMGLAIGTHGANIQQARKVPGVTAIELGEETCTFRIYGETPEACRQARSYLEFSEDSV   |
| 04:9913 21014 NM_001206289 FXR2 Bos_taurus         | EDLMGLAIGTHGANIQQARKVPGVTAIELGEETCTFRIYGETPEACRQARSYLEFSEDSV   |
| 06:10116 21014 NM_001100647 Fxr2 Rattus_norvegicus | EDLMGLAIGTHGANIQQARKVPGVTAIELGEETCTFRIYGETPEACRQARSYLEFSEDSV   |
| 07:10090 21014 NM_011814 Fxr2 Mus_musculus         | EDLMGLAIGTHGANIQQARKVPGVTAIELGEETCTFRIYGETPEACRQARSYLEFSEDSV   |
| 10:7955 21014 NM_200211 fxr2 Danio_rerio           | EDLMGLAIGSHGANIQQARKVPGVTAIELEESCTFRIYGETPEAVKQARTYLEFKEDS     |
| 00:1 Ac-AETKAAAADGERPGPGPLLVGCGR                   | -----                                                          |
| 01:9606 21014 0#NP_004851 FXR2 Homo_sapiens        | QVPRNLVGKVI GKNKQV IQEIVDKSGVVRVRVEGDNKKNPREE-----             |
| 01:9606 21014 NM_004860 FXR2 Homo_sapiens          | QVPRNLVGKVI GKNKQV IQEIVDKSGVVRVRVEGDNKKNPREE-----             |
| 03:9544 21014 NM_001266676 FXR2 Macaca_mulatta     | QVPRNLVGKVI GKNKQV IQEIVDKSGVVRVRVEGDNKKNPREE-----             |
| 04:9913 21014 NM_001206289 FXR2 Bos_taurus         | QVPRNLVGKVI GKNKQV IQEIVDKSGVVRVRVEGDNKKNPREE-----             |
| 06:10116 21014 NM_001100647 Fxr2 Rattus_norvegicus | QVPRNLVGKVI GKNKQV IQEIVDKSGVVRVRVEGDNKKNPREE-----             |
| 07:10090 21014 NM_011814 Fxr2 Mus_musculus         | QVPRNLVGKVI GKNKQV IQEIVDKSGVVRVRVEGDNKKNPREE-----             |
| 10:7955 21014 NM_200211 fxr2 Danio_rerio           | PVPRNLVGKVI GKNKQV IQEIVDKSGVVRVRIEGDNKKLPREEGGRQAGRDNI VSSQE  |
| 00:1 Ac-AETKAAAADGERPGPGPLLVGCGR                   | -----                                                          |
| 01:9606 21014 0#NP_004851 FXR2 Homo_sapiens        | GMVPFIFVGTRENISNAQALLEYHLSY LQEVEQLRLERLQIDEQLRQIGLGRPPGSGRG   |
| 01:9606 21014 NM_004860 FXR2 Homo_sapiens          | GMVPFIFVGTRENISNAQALLEYHLSY LQEVEQLRLERLQIDEQLRQIGLGRPPGSGRG   |

|          |  |       |  |              |  |      |  |                   |                                                              |
|----------|--|-------|--|--------------|--|------|--|-------------------|--------------------------------------------------------------|
| 03:9544  |  | 21014 |  | NM_001266676 |  | FXR2 |  | Macaca_mulatta    | GMVPFIFVGTRENISNAQALLEYHLSYQLQEVEQLRLERLQIDEQLRQIGLGRPPGSGRG |
| 04:9913  |  | 21014 |  | NM_001206289 |  | FXR2 |  | Bos_taurus        | GMVPFIFVGTRENISNAQALLEYHLSYQLQEVEQLRLERLQIDEQLRQIGLGRPPGSGRG |
| 06:10116 |  | 21014 |  | NM_001100647 |  | Fxr2 |  | Rattus_norvegicus | GMVPFIFVGTRENISNAQALLEYHLSYQLQEVEQLRLERLQIDEQLRQIGLGRPPGSGRG |
| 07:10090 |  | 21014 |  | NM_011814    |  | Fxr2 |  | Mus_musculus      | GMVPFIFVGTRENISNAQALLEYHLSYQLQEVEQLRLERLQIDEQLRQIGLGRPPGSGRG |
| 10:7955  |  | 21014 |  | NM_200211    |  | fxr2 |  | Danio_rerio       | GTVPFIFVGTRENISNAQALLEYHVAYLQEVEQLRLERLQIDEQLRQIGVGYRAPPSRSG |

|          |  |                                           |                                                              |
|----------|--|-------------------------------------------|--------------------------------------------------------------|
| 00:1     |  | Ac-AETKAAAADGERPGPGPLLVGCGR               | -----                                                        |
| 01:9606  |  | 21014 0#NP_004851 FXR2 Homo_sapiens       | S--GGSDKAGYSTDESSSSSLHATRTYGGSYGGRGRGRRTG--GPAYGPSSDVSTASETE |
| 01:9606  |  | 21014 NM_004860 FXR2 Homo_sapiens         | S--GGSDKAGYSTDESSSSSLHATRTYGGSYGGRGRGRRTG--GPAYGPSSDVSTASETE |
| 03:9544  |  | 21014 NM_001266676 FXR2 Macaca_mulatta    | S--GGSDKAGYSTDESSSSSLHATRTYGGSYGGRGRGRRTG--GPAYGPSSDVSTASETE |
| 04:9913  |  | 21014 NM_001206289 FXR2 Bos_taurus        | S--GSSDKAGYTTDESSSSSLHTTTRYGGSYGGRGRGRRTG--GPAYGPNSDLSTASETE |
| 06:10116 |  | 21014 NM_001100647 Fxr2 Rattus_norvegicus | GSGGGSKDAGYTTDESSSSSLHTTTRYGGSYGGRGRGRRTG--GPAYGPSSDPSTASETE |
| 07:10090 |  | 21014 NM_011814 Fxr2 Mus_musculus         | GSGGGSKDAGYTTDESSSSSLHTTTRYGGSYGGRGRGRRTG--GPAYGPSSDPSTASETE |
| 10:7955  |  | 21014 NM_200211 fxr2 Danio_rerio          | SGVAGERERGYLTDESTN-SLQTTRTYG---GRGRGRKNPNNTYSGYGTNSEMSNASETE |

|          |  |                                           |                                                              |
|----------|--|-------------------------------------------|--------------------------------------------------------------|
| 00:1     |  | Ac-AETKAAAADGERPGPGPLLVGCGR               | -----                                                        |
| 01:9606  |  | 21014 0#NP_004851 FXR2 Homo_sapiens       | SEKREEPNRAGPGDRDPPTRGEESRRRPTGGRGRGPPAPRPTSRYNSSSISSVLKDPDS  |
| 01:9606  |  | 21014 NM_004860 FXR2 Homo_sapiens         | SEKREEPNRAGPGDRDPPTRGEESRRRPTGGRGRGPPAPRPTSRYNSSSISSVLKDPDS  |
| 03:9544  |  | 21014 NM_001266676 FXR2 Macaca_mulatta    | SEKREEPNRAGPGDRDPPTRGEESRRRPIGGRGRGPPAPRPTSRYNSSSISSVLKDPDS  |
| 04:9913  |  | 21014 NM_001206289 FXR2 Bos_taurus        | SEKREEPNRAGPGDRDPPTRGEESRRRPIGGRGRGPPAPRPTSRYNSSSISSVLKDPDS  |
| 06:10116 |  | 21014 NM_001100647 Fxr2 Rattus_norvegicus | SEKREESNRAGPGDRDPPSRGEESRRRPIGGRGRGPPVPVRPTSRYNSSSISSVLKDPDS |
| 07:10090 |  | 21014 NM_011814 Fxr2 Mus_musculus         | SEKREESNRAGPGDRDPPSRGEESRRRPIGGRGRGPPVPVRPTSRYNSSSISSVLKDPDS |
| 10:7955  |  | 21014 NM_200211 fxr2 Danio_rerio          | DLGDRESRPKVGADDRGSKRGGGRGRGSSAGRGRGGP-----GPRNINTISSVLKDPDS  |

|          |  |                                           |                                                              |
|----------|--|-------------------------------------------|--------------------------------------------------------------|
| 00:1     |  | Ac-AETKAAAADGERPGPGPLLVGCGR               | -----                                                        |
| 01:9606  |  | 21014 0#NP_004851 FXR2 Homo_sapiens       | NPYSLLDTSEPEPPVDSEPGEPPPASARRRRSRRRRTDEDRTVMDGGLE-SDG-PNMTEN |
| 01:9606  |  | 21014 NM_004860 FXR2 Homo_sapiens         | NPYSLLDTSEPEPPVDSEPGEPPPASARRRRSRRRRTDEDRTVMDGGLE-SDG-PNMTEN |
| 03:9544  |  | 21014 NM_001266676 FXR2 Macaca_mulatta    | NPYSLLDTSEPEPPVDSEPGEPPPASARRRRSRRRRTDEDRTVMDGGLE-SDG-PNMTEN |
| 04:9913  |  | 21014 NM_001206289 FXR2 Bos_taurus        | NPYSLLDTSEPEPPVDSEPGEPPPASARRRRSRRRRTDEDRTVMDGGLE-SDG-PGMTEN |
| 06:10116 |  | 21014 NM_001100647 Fxr2 Rattus_norvegicus | NPYSLLDTSEPEPPVDSEPGEPPPASARRRRSRRRRTDEDRTVMDGGLE-SDG-PNVTEN |
| 07:10090 |  | 21014 NM_011814 Fxr2 Mus_musculus         | NPYSLLDTSEPEPPVDSEPGEPPPASARRRRSRRRRTDEDRTVMDGGLE-SDG-PNMTEN |
| 10:7955  |  | 21014 NM_200211 fxr2 Danio_rerio          | NPYSLLEGEGEQ-GGDTDASESMGGIDRRRRSRRRRNDLEPSLMDAAANESDGQGATSEN |

|          |  |                                           |                                                              |
|----------|--|-------------------------------------------|--------------------------------------------------------------|
| 00:1     |  | Ac-AETKAAAADGERPGPGPLLVGCGR               | -----                                                        |
| 01:9606  |  | 21014 0#NP_004851 FXR2 Homo_sapiens       | GLEDES RPQRNRSRRRNRNGNRTD-GSISGDRQPVTVADYISRAESQSRQRPPLERTKP |
| 01:9606  |  | 21014 NM_004860 FXR2 Homo_sapiens         | GLEDES RPQRNRSRRRNRNGNRTD-GSISGDRQPVTVADYISRAESQSRQRPPLERTKP |
| 03:9544  |  | 21014 NM_001266676 FXR2 Macaca_mulatta    | GLEDES RPQRNRSRRRNRNGNRTD-GSISGDRQPVTVADYISRAESQSRQRPPLERTKP |
| 04:9913  |  | 21014 NM_001206289 FXR2 Bos_taurus        | GLEDES RPQRNRSRRRNRNGNRTD-GSISGDRQPVTVADYISRAKSQSRQRPPLERTKP |
| 06:10116 |  | 21014 NM_001100647 Fxr2 Rattus_norvegicus | GLEDES RPQRNRSRRRNRNGNRTD-GSISGDRQPVTVADYISRAESQSRQRPPLERTKP |
| 07:10090 |  | 21014 NM_011814 Fxr2 Mus_musculus         | GLEDES RPQRNRSRRRNRNGNRTD-GSISGDRQPVTVADYISRAESQSRQR-PLERTKP |
| 10:7955  |  | 21014 NM_200211 fxr2 Danio_rerio          | GLEEEGRPQRNRSRRRNRNANRPEGGSTSRDRQPVTVADFISRAESQSRQNLPGKEANP  |

|          |  |                                           |                                              |
|----------|--|-------------------------------------------|----------------------------------------------|
| 00:1     |  | Ac-AETKAAAADGERPGPGPLLVGCGR               | -----                                        |
| 01:9606  |  | 21014 0#NP_004851 FXR2 Homo_sapiens       | SEDSLSGQKGD SVSKLPKGPS---ENGELSAPLELGSMVNGVS |
| 01:9606  |  | 21014 NM_004860 FXR2 Homo_sapiens         | SEDSLSGQKGD SVSKLPKGPS---ENGELSAPLELGSMVNGVS |
| 03:9544  |  | 21014 NM_001266676 FXR2 Macaca_mulatta    | SEDSLSGQKGD SVSKLPKGPS---ENGELSAPLELGSMVNGVS |
| 04:9913  |  | 21014 NM_001206289 FXR2 Bos_taurus        | SEDSLSGQKGD SVSKLPKGPS---ENGELSAPLELGSLVNGVS |
| 06:10116 |  | 21014 NM_001100647 Fxr2 Rattus_norvegicus | SEDSLSGQKGD SVSRLPKGPS---ENGELSAPLELGSLVNGVS |
| 07:10090 |  | 21014 NM_011814 Fxr2 Mus_musculus         | SEDSLSGQKGD SVSKLPKGPS---ENGELSAPLELGSLVNGVS |
| 10:7955  |  | 21014 NM_200211 fxr2 Danio_rerio          | HVSH-PKENGTSVSKEERTPSKRSPSNGVASPGEALAMVNGVS  |

***MYL12A***

Ac-MQQQDLTTMSSKR

CLUSTAL O(1.2.1) multiple sequence alignment

|                                                   |                                                              |
|---------------------------------------------------|--------------------------------------------------------------|
| 00:1 Ac-MQQQDLTTTMSKKR                            | -----MQQQDLTTTMSKKR-----                                     |
| 01:9606 23407 0#NP_001289976 MYL12A Homo_sapiens  | -----MSSKRTKT-KTKKRPQRATS                                    |
| 01:9606 23407 0#NP_001289977 MYL12A Homo_sapiens  | -----MSSKRTKT-KTKKRPQRATS                                    |
| 01:9606 23407 0#NP_001289978 MYL12A Homo_sapiens  | -----MDLTTTMSKKRTKT-KTKKRPQRATS                              |
| 01:9606 23407 0#NP_006462 MYL12A Homo_sapiens     | -----MSSKRTKT-KTKKRPQRATS                                    |
| 01:9606 23407 NM_001303047 MYL12A Homo_sapiens    | -----LKKKDLTTTMSKKRTKT-KTKKRPQRATS                           |
| 01:9606 23407 NM_001303048 MYL12A Homo_sapiens    | ALRRALECAARQSHRTDATICGKDRGEEDLTLQQQDLTTTMSKKRTKT-KTKKRPQRATS |
| 01:9606 23407 NM_001303049 MYL12A Homo_sapiens    | -----RMDLTTTMSKKRTKT-KTKKRPQRATS                             |
| 01:9606 23407 NM_006471 MYL12A Homo_sapiens       | -----LCRDLTMTTMSKKRTKT-KTKKRPQRATS                           |
| 03:9544 23407 NM_001257736 MYL12A Macaca_mulatta  | -----LCRDLTMTTMSKKRAKT-KTKKRPQRATS                           |
| 04:9913 23407 NM_001083764 MYL12B Bos_taurus      | -----TATMSSKKAKT-KTKKRPQRATS                                 |
| 06:10116 23407 NM_017343 My112b Rattus_norvegicus | -----TATMSSKKAKT-TTKKRPQRATS                                 |
| 07:10090 23407 NM_023402 My112b Mus_musculus      | -----TATMSSKKAKT-TTKKRPQRATS                                 |
| 10:7955 23407 NM_214699 myl12.1 Danio_rerio       | -----VKPNTAKMSSKRAKGITTKRPQRATS                              |
|                                                   | *****:                                                       |
| 00:1 Ac-MQQQDLTTTMSKKR                            | -----                                                        |
| 01:9606 23407 0#NP_001289976 MYL12A Homo_sapiens  | NVFAMFDQSQIQEFKEAFNMIDQNRDGFIDKEDLHDMLASLGKNPTDEYLDAMMNEAPGP |
| 01:9606 23407 0#NP_001289977 MYL12A Homo_sapiens  | NVFAMFDQSQIQEFKEAFNMIDQNRDGFIDKEDLHDMLASLGKNPTDEYLDAMMNEAPGP |
| 01:9606 23407 0#NP_001289978 MYL12A Homo_sapiens  | NVFAMFDQSQIQEFKEAFNMIDQNRDGFIDKEDLHDMLASLGKNPTDEYLDAMMNEAPGP |
| 01:9606 23407 0#NP_006462 MYL12A Homo_sapiens     | NVFAMFDQSQIQEFKEAFNMIDQNRDGFIDKEDLHDMLASLGKNPTDEYLDAMMNEAPGP |
| 01:9606 23407 NM_001303047 MYL12A Homo_sapiens    | NVFAMFDQSQIQEFKEAFNMIDQNRDGFIDKEDLHDMLASLGKNPTDEYLDAMMNEAPGP |
| 01:9606 23407 NM_001303048 MYL12A Homo_sapiens    | NVFAMFDQSQIQEFKEAFNMIDQNRDGFIDKEDLHDMLASLGKNPTDEYLDAMMNEAPGP |
| 01:9606 23407 NM_001303049 MYL12A Homo_sapiens    | NVFAMFDQSQIQEFKEAFNMIDQNRDGFIDKEDLHDMLASLGKNPTDEYLDAMMNEAPGP |
| 01:9606 23407 NM_006471 MYL12A Homo_sapiens       | NVFAMFDQSQIQEFKEAFNMIDQNRDGFIDKEDLHDMLASLGKNPTDEYLDAMMNEAPGP |
| 03:9544 23407 NM_001257736 MYL12A Macaca_mulatta  | NVFAMFDQSQIQEFKEAFNMIDQNRDGFIDKEDLHDMLASLGKNPTDDYLDAMMNEAPGP |
| 04:9913 23407 NM_001083764 MYL12B Bos_taurus      | NVFAMFDQSQIQEFKEAFNMIDQNRDGFIDKEDLHDMLASLGKNPTDAYLEAMMNEAPGP |
| 06:10116 23407 NM_017343 My112b Rattus_norvegicus | NVFAMFDQSQIQEFKEAFNMIDQNRDGFIDKEDLHDMLASLGKNPTDAYLDAMMNEAPGP |
| 07:10090 23407 NM_023402 My112b Mus_musculus      | NVFAMFDQSQIQEFKEAFNMIDQNRDGFIDKEDLHDMLASLGKNPTDAYLDAMMNEAPGP |
| 10:7955 23407 NM_214699 myl12.1 Danio_rerio       | NVFAMFDQSQIQEFKEAFNMIDQNRDGFIDKEDLHDMLASLGKNPADDYLEAMMTEAPGP |
|                                                   | -----                                                        |
| 00:1 Ac-MQQQDLTTTMSKKR                            | -----                                                        |
| 01:9606 23407 0#NP_001289976 MYL12A Homo_sapiens  | INFTMFLTMFGEKLNGTDPEDVIRNAFACFDEEATGTIQEDYLRELLTTMGDRFTDEEVD |
| 01:9606 23407 0#NP_001289977 MYL12A Homo_sapiens  | INFTMFLTMFGEKLNGTDPEDVIRNAFACFDEEATGTIQEDYLRELLTTMGDRFTDEEVD |
| 01:9606 23407 0#NP_001289978 MYL12A Homo_sapiens  | INFTMFLTMFGEKLNGTDPEDVIRNAFACFDEEATGTIQEDYLRELLTTMGDRFTDEEVD |
| 01:9606 23407 0#NP_006462 MYL12A Homo_sapiens     | INFTMFLTMFGEKLNGTDPEDVIRNAFACFDEEATGTIQEDYLRELLTTMGDRFTDEEVD |
| 01:9606 23407 NM_001303047 MYL12A Homo_sapiens    | INFTMFLTMFGEKLNGTDPEDVIRNAFACFDEEATGTIQEDYLRELLTTMGDRFTDEEVD |
| 01:9606 23407 NM_001303048 MYL12A Homo_sapiens    | INFTMFLTMFGEKLNGTDPEDVIRNAFACFDEEATGTIQEDYLRELLTTMGDRFTDEEVD |
| 01:9606 23407 NM_001303049 MYL12A Homo_sapiens    | INFTMFLTMFGEKLNGTDPEDVIRNAFACFDEEATGTIQEDYLRELLTTMGDRFTDEEVD |
| 01:9606 23407 NM_006471 MYL12A Homo_sapiens       | INFTMFLTMFGEKLNGTDPEDVIRNAFACFDEEATGTIQEDYLRELLTTMGDRFTDEEVD |
| 03:9544 23407 NM_001257736 MYL12A Macaca_mulatta  | INFTMFLTMFGEKLNGTDPEDVIRNAFACFDEEATGTIQEDYLRELLTTMGDRFTDEEVD |
| 04:9913 23407 NM_001083764 MYL12B Bos_taurus      | INFTMFLTMFGEKLNGTDPEDVIRNAFACFDEEATGTIQEDYLRELLTTMGDRFTDEEVD |
| 06:10116 23407 NM_017343 My112b Rattus_norvegicus | INFTMFLTMFGEKLNGTDPEDVIRNAFACFDEEATGTIQEDYLRELLTTMGDRFTDEEVD |
| 07:10090 23407 NM_023402 My112b Mus_musculus      | INFTMFLTMFGEKLNGTDPEDVIRNAFACFDEEATGTIQEDYLRELLTTMGDRFTDEEVD |
| 10:7955 23407 NM_214699 myl12.1 Danio_rerio       | INFTMFLTMFGEKLNGTDEEVIRNAFACFDEEGTGFIHEDYLRELLTTMGDRFTDEEVD  |
|                                                   | -----                                                        |
| 00:1 Ac-MQQQDLTTTMSKKR                            | -----                                                        |
| 01:9606 23407 0#NP_001289976 MYL12A Homo_sapiens  | ELYREAPIDKKGNFNIEFTRILKHGAKDKDD                              |
| 01:9606 23407 0#NP_001289977 MYL12A Homo_sapiens  | ELYREAPIDKKGNFNIEFTRILKHGAKDKDD                              |
| 01:9606 23407 0#NP_001289978 MYL12A Homo_sapiens  | ELYREAPIDKKGNFNIEFTRILKHGAKDKDD                              |
| 01:9606 23407 0#NP_006462 MYL12A Homo_sapiens     | ELYREAPIDKKGNFNIEFTRILKHGAKDKDD                              |
| 01:9606 23407 NM_001303047 MYL12A Homo_sapiens    | ELYREAPIDKKGNFNIEFTRILKHGAKDKDD                              |
| 01:9606 23407 NM_001303048 MYL12A Homo_sapiens    | ELYREAPIDKKGNFNIEFTRILKHGAKDKDD                              |
| 01:9606 23407 NM_001303049 MYL12A Homo_sapiens    | ELYREAPIDKKGNFNIEFTRILKHGAKDKDD                              |
| 01:9606 23407 NM_006471 MYL12A Homo_sapiens       | ELYREAPIDKKGNFNIEFTRILKHGAKDKDD                              |
| 03:9544 23407 NM_001257736 MYL12A Macaca_mulatta  | ELYREAPIDKKGNFNIEFTRILKHGAKDKDD                              |
| 04:9913 23407 NM_001083764 MYL12B Bos_taurus      | ELYREAPIDKKGNFNIEFTRILKHGAKDKDD                              |
| 06:10116 23407 NM_017343 My112b Rattus_norvegicus | ELYREAPIDKKGNFNIEFTRILKHGAKDKDD                              |
| 07:10090 23407 NM_023402 My112b Mus_musculus      | ELYREAPIDKKGNFNIEFTRILKHGAKDKDD                              |
| 10:7955 23407 NM_214699 myl12.1 Danio_rerio       | ELFREAPIDKKSNNFNVEFTRILKHGAKDKDD                             |

***ZNF48***

Ac-AEPEAAGKGGVPAMER

CLUSTAL O(1.2.1) multiple sequence alignment

|                                                 |                                                                 |
|-------------------------------------------------|-----------------------------------------------------------------|
| 00:1 Ac-AEPEAAAGKGGVPAMER                       | -----AEPEAAAGKGGVPAMER-----                                     |
| 01:9606 27098 0#NP_001201835 ZNF48 Homo_sapiens | -----MERAVEPWWGPD                                               |
| 01:9606 27098 0#NP_001201836 ZNF48 Homo_sapiens | -----                                                           |
| 01:9606 27098 0#NP_001201838 ZNF48 Homo_sapiens | -----MERAVEPWWGPD                                               |
| 01:9606 27098 0#NP_689865 ZNF48 Homo_sapiens    | -----MERAVEPWWGPD                                               |
| 01:9606 27098 NM_001214906 ZNF48 Homo_sapiens   | -----LARARAAP-AEVPGGAGQCGARGLDKRPTEGGAEGGVPAMERAVEPWWGPD        |
| 01:9606 27098 NM_001214907 ZNF48 Homo_sapiens   | -----                                                           |
| 01:9606 27098 NM_001214909 ZNF48 Homo_sapiens   | -----GAPEGAGVAEPEAAAGKGGVPAMERAVEPWWGPD                         |
| 01:9606 27098 NM_152652 ZNF48 Homo_sapiens      | -----PRDAVCPLAQGGVPAMERAVEPWWGPD                                |
| 04:9913 27098 NM_001101958 ZNF48 Bos_taurus     | WHGHRSPAELWRAPDWRKWRLKQ--RRQRREGKGAARRKEQGGVPAMERAVGPWWGSD      |
| 07:10090 27098 NM_146201 Zfp553 Mus_musculus    |                                                                 |
| 00:1 Ac-AEPEAAAGKGGVPAMER                       | -----                                                           |
| 01:9606 27098 0#NP_001201835 ZNF48 Homo_sapiens | LHRPEEREPPQRGARTGLGSEN-VISQPNFEHTPQED-DLGFKE-EDLAPDHEVGNASLK    |
| 01:9606 27098 0#NP_001201836 ZNF48 Homo_sapiens |                                                                 |
| 01:9606 27098 0#NP_001201838 ZNF48 Homo_sapiens | LHRPEEREPPQRGARTGLGSEN-VISQPNFEHTPQED-DLGFKE-EDLAPDHEVGNASLK    |
| 01:9606 27098 0#NP_689865 ZNF48 Homo_sapiens    | LHRPEEREPPQRGARTGLGSEN-VISQPNFEHTPQED-DLGFKE-EDLAPDHEVGNASLK    |
| 01:9606 27098 NM_001214906 ZNF48 Homo_sapiens   | LHRPEEREPPQRGARTGLGSEN-VISQPNFEHTPQED-DLGFKE-EDLAPDHEVGNASLK    |
| 01:9606 27098 NM_001214907 ZNF48 Homo_sapiens   | -----RRSRGLGSEN-VISQPNFEHTPQED-DLGFKE-EDLAPDHEVGNASLK           |
| 01:9606 27098 NM_001214909 ZNF48 Homo_sapiens   | LHRPEEREPPQRGARTGLGSENV-ISQPNFEHTPQEDD-LGFK-EEDLAPDHEVGNASLK    |
| 01:9606 27098 NM_152652 ZNF48 Homo_sapiens      | LHRPEEREPPQRGARTGLGSEN-VISQPNFEHTPQED-DLGFKE-EDLAPDHEVGNASLK    |
| 04:9913 27098 NM_001101958 ZNF48 Bos_taurus     | LRSSSEERQLRGARTGLGSEHAEISQPDFEFHAPQED-DLEFKEEDLAPGHEVGNASLK     |
| 07:10090 27098 NM_146201 Zfp553 Mus_musculus    | -----KRLRAIGTGTETMEASPGDEFEHSPQERDGPETKEEEQLAPTLQVGNNTSLK       |
| 00:1 Ac-AEPEAAAGKGGVPAMER                       | -----                                                           |
| 01:9606 27098 0#NP_001201835 ZNF48 Homo_sapiens | PEGIQNWDDLWVQREGLGKQPDRDRGPRLLGEPWGWQASSDRAAVCGECGKSFRQMSDLV    |
| 01:9606 27098 0#NP_001201836 ZNF48 Homo_sapiens | -----MSDLV                                                      |
| 01:9606 27098 0#NP_001201838 ZNF48 Homo_sapiens | PEGIQNWDDLWVQREGLGKQPDRDRGPRLLGEPWGWQASSDRAAVCGECGKSFRQMSDLV    |
| 01:9606 27098 0#NP_689865 ZNF48 Homo_sapiens    | PEGIQNWDDLWVQREGLGKQPDRDRGPRLLGEPWGWQASSDRAAVCGECGKSFRQMSDLV    |
| 01:9606 27098 NM_001214906 ZNF48 Homo_sapiens   | PEGIQNWDDLWVQREGLGKQPDRDRGPRLLGEPWGWQASSDRAAVCGECGKSFRQMSDLV    |
| 01:9606 27098 NM_001214907 ZNF48 Homo_sapiens   | PEGIQNWDDLWVQREGLGKQPDRDRGPRLLGEPWGWQASSDRAAVCGECGKSFRQMSDLV    |
| 01:9606 27098 NM_001214909 ZNF48 Homo_sapiens   | PEGIQNWDDLWVQREGLGKQPDRDRGPRLLGEPWGWQASSDRAAVCGECGKSFRQMSDLV    |
| 01:9606 27098 NM_152652 ZNF48 Homo_sapiens      | PEGIQNWDDLWVQREGLGKQPDRDRGPRLLGEPWGWQASSDRAAVCGECGKSFRQMSDLV    |
| 04:9913 27098 NM_001101958 ZNF48 Bos_taurus     | PEGIQTWDDLWVQREGPGKQARDRGPRLLGEPWGWQAS-DRAAVCGECGKSFRQMSDLV     |
| 07:10090 27098 NM_146201 Zfp553 Mus_musculus    | PDGIQCWDDLWDRREGLGKRQPRDPVPRILGEPWGWQGSNDRAAVCGECGKSFRQMSDLV    |
| 00:1 Ac-AEPEAAAGKGGVPAMER                       | -----                                                           |
| 01:9606 27098 0#NP_001201835 ZNF48 Homo_sapiens | KHQRTHTGEEKPYKCGVCGKGFGDSSARIKHQRTHSGEKPYRARPPAQGPPKIPRSRIPAG   |
| 01:9606 27098 0#NP_001201836 ZNF48 Homo_sapiens | KHQRTHTGEEKPYKCGVCGKGFGDSSARIKHQRTHSGEKPYRARPPAQGPPKIPRSRIPAG   |
| 01:9606 27098 0#NP_001201838 ZNF48 Homo_sapiens | KHQRTHTGEEKPYKCGVCGKGFGDSSARIKHQRTHSGEKPYRARPPAQGPPKIPRSRIPAG   |
| 01:9606 27098 0#NP_689865 ZNF48 Homo_sapiens    | KHQRTHTGEEKPYKCGVCGKGFGDSSARIKHQRTHSGEKPYRARPPAQGPPKIPRSRIPAG   |
| 01:9606 27098 NM_001214906 ZNF48 Homo_sapiens   | KHQRTHTGEEKPYKCGVCGKGFGDSSARIKHQRTHSGEKPYRARPPAQGPPKIPRSRIPAG   |
| 01:9606 27098 NM_001214907 ZNF48 Homo_sapiens   | KHQRTHTGEEKPYKCGVCGKGFGDSSARIKHQRTHSGEKPYRARPPAQGPPKIPRSRIPAG   |
| 01:9606 27098 NM_001214909 ZNF48 Homo_sapiens   | KHQRTHTGEEKPYKCGVCGKGFGDSSARIKHQRTHSGEKPYRARPPAQGPPKIPRSRIPAG   |
| 01:9606 27098 NM_152652 ZNF48 Homo_sapiens      | KHQRTHTGEEKPYKCGVCGKGFGDSSARIKHQRTHSGEKPYRARPPAQGPPKIPRSRIPAG   |
| 04:9913 27098 NM_001101958 ZNF48 Bos_taurus     | KHQRTHTGEEKPYKCGVCGKGFGDSSARIKHQRTHSGEKPYRARAPAQGPPKIPRSRIPAG   |
| 07:10090 27098 NM_146201 Zfp553 Mus_musculus    | KHQRTHTGEEKPYKCGVCGKGFGDSSARIKHQRTHTGEKAYRVRRPPAPGPPKMPRSRIPAG  |
| 00:1 Ac-AEPEAAAGKGGVPAMER                       | -----                                                           |
| 01:9606 27098 0#NP_001201835 ZNF48 Homo_sapiens | ERPTICGECGKSFRQSSDLVKHQRTHTGEEKPYKCGICGKGFGDSSARIKHQRTHRGEQPP   |
| 01:9606 27098 0#NP_001201836 ZNF48 Homo_sapiens | ERPTICGECGKSFRQSSDLVKHQRTHTGEEKPYKCGICGKGFGDSSARIKHQRTHRGEQPP   |
| 01:9606 27098 0#NP_001201838 ZNF48 Homo_sapiens | ERPTICGECGKSFRQSSDLVKHQRTHTGEEKPYKCGICGKGFGDSSARIKHQRTHRGEQPP   |
| 01:9606 27098 0#NP_689865 ZNF48 Homo_sapiens    | ERPTICGECGKSFRQSSDLVKHQRTHTGEEKPYKCGICGKGFGDSSARIKHQRTHRGEQPP   |
| 01:9606 27098 NM_001214906 ZNF48 Homo_sapiens   | ERPTICGECGKSFRQSSDLVKHQRTHTGEEKPYKCGICGKGFGDSSARIKHQRTHRGEQPP   |
| 01:9606 27098 NM_001214907 ZNF48 Homo_sapiens   | ERPTICGECGKSFRQSSDLVKHQRTHTGEEKPYKCGICGKGFGDSSARIKHQRTHRGEQPP   |
| 01:9606 27098 NM_001214909 ZNF48 Homo_sapiens   | ERPTICGECGKSFRQSSDLVKHQRTHTGEEKPYKCGICGKGFGDSSARIKHQRTHRGEQPP   |
| 01:9606 27098 NM_152652 ZNF48 Homo_sapiens      | ERPTICGECGKSFRQSSDLVKHQRTHTGEEKPYKCGICGKGFGDSSARIKHQRTHRGEQPP   |
| 04:9913 27098 NM_001101958 ZNF48 Bos_taurus     | ERPTICGECGKSFRQSSDLVKHQRTHTGEEKPYKCGICGKGFGDSSARIKHQRTHRGEQPP   |
| 07:10090 27098 NM_146201 Zfp553 Mus_musculus    | ERPTICGECGKSFRQSSDLVKHQRTHTGEEKPYKCGICGKGFGDSSARIKHQRTHRGDLPL   |
| 00:1 Ac-AEPEAAAGKGGVPAMER                       | -----                                                           |
| 01:9606 27098 0#NP_001201835 ZNF48 Homo_sapiens | RPVVVPRRQPSRAATAATQGPKAQDKPYICTDCGKRFLVLSCSLLSHQSRHLGPKPFPGCDVC |
| 01:9606 27098 0#NP_001201836 ZNF48 Homo_sapiens | RPVVVPRRQPSRAATAATQGPKAQDKPYICTDCGKRFLVLSCSLLSHQSRHLGPKPFPGCDVC |
| 01:9606 27098 0#NP_001201838 ZNF48 Homo_sapiens | RPVVVPRRQPSRAATAATQGPKAQDKPYICTDCGKRFLVLSCSLLSHQSRHLGPKPFPGCDVC |
| 01:9606 27098 0#NP_689865 ZNF48 Homo_sapiens    | RPVVVPRRQPSRAATAATQGPKAQDKPYICTDCGKRFLVLSCSLLSHQSRHLGPKPFPGCDVC |
| 01:9606 27098 NM_001214906 ZNF48 Homo_sapiens   | RPVVVPRRQPSRAATAATQGPKAQDKPYICTDCGKRFLVLSCSLLSHQSRHLGPKPFPGCDVC |
| 01:9606 27098 NM_001214907 ZNF48 Homo_sapiens   | RPVVVPRRQPSRAATAATQGPKAQDKPYICTDCGKRFLVLSCSLLSHQSRHLGPKPFPGCDVC |
| 01:9606 27098 NM_001214909 ZNF48 Homo_sapiens   | RPVVVPRRQPSRAATAATQGPKAQDKPYICTDCGKRFLVLSCSLLSHQSRHLGPKPFPGCDVC |
| 01:9606 27098 NM_152652 ZNF48 Homo_sapiens      | RPVVVPRRQPSRAATAATQGPKAQDKPYICTDCGKRFLVLSCSLLSHQSRHLGPKPFPGCDVC |
| 04:9913 27098 NM_001101958 ZNF48 Bos_taurus     | RPVVVPRRQPSRAATAAAQGPKAQDKPYICTDCGKRFLVLSCSLLSHQSRHLGPKPFPGCDVC |
| 07:10090 27098 NM_146201 Zfp553 Mus_musculus    | RPVVVPRRQPSPAAPAPHRPKAQDKPYICTDCGKRFLVLSCSLLSHQSRHLGPKPFPGCDVC  |
| 00:1 Ac-AEPEAAAGKGGVPAMER                       | -----                                                           |
| 01:9606 27098 0#NP_001201835 ZNF48 Homo_sapiens | GKEFARGSDLVKHLRVHTGEEKPYLCPECGKGFDSSARVKHLRTHSGERPHACPECDRTF    |
| 01:9606 27098 0#NP_001201836 ZNF48 Homo_sapiens | GKEFARGSDLVKHLRVHTGEEKPYLCPECGKGFDSSARVKHLRTHSGERPHACPECDRTF    |
| 01:9606 27098 0#NP_001201838 ZNF48 Homo_sapiens | GKEFARGSDLVKHLRVHTGEEKPYLCPECGKGFDSSARVKHLRTHSGERPHACPECDRTF    |
| 01:9606 27098 0#NP_689865 ZNF48 Homo_sapiens    | GKEFARGSDLVKHLRVHTGEEKPYLCPECGKGFDSSARVKHLRTHSGERPHACPECDRTF    |

[illegible]

-----  
-PFGLPGLPEPEPGGPQAGEPPPLAGDKPHKCECGKGFRSSDLVKHHRVHTGEKPYLC  
-PFGLPGLPEPEPGGPQAGEPPPLAGDKPHKCECGKGFRSSDLVKHHRVHTGEKPYLC  
-PFGLPGLPEPEPGGPQAGEPPPLAGDKPHKCECGKGFRSSDLVKHHRVHTGEKPYLC  
-PFGLPGLPEPEPGGPQAGEPPPLAGDKPHKCECGKGFRSSDLVKHHRVHTGEKPYLC  
-PFGLPGLPEPEPGGPQAGEPPPLAGDKPHKCECGKGFRSSDLVKHHRVHTGEKPYLC  
EPFGLPGLPEPEPGGPQAGEPPPLAGDKPHKCECGKGFRSSDLVKHHRVHTGEKPYLC  
-PFGLPGLPEPEPGGPQAGEPPPLAGDKPHKCECGKGFRSSDLVKHHRVHTGEKPYLC  
GPFGLPGLPEPEPGGPQAGEPPPLEGDKPHKCECGKGFRSSDLMKHHRVHTGEKPYLC  
-PFGLPGLPEPEPGGPQAGEPPPLAGDKPHKCECGKGFRSSDLVKHHRVHTGEKPYLC

-----  
 P  
E  
C  
G  
K  
G  
F  
A  
D  
S  
S  
A  
R  
V  
K  
H  
L  
R  
T  
H  
R  
G  
E  
R  
A  
R  
P  
P  
P  
S  
T  
L  
L  
R  
P  
H  
N  
P  
P  
G  
V  
P  
M  
A  
P  
R  
P  
R  
V  
R  
A  
Q  
P  
S  
G  
P  
S  
 P  
E  
C  
G  
K  
G  
F  
A  
D  
S  
S  
A  
R  
V  
K  
H  
L  
R  
T  
H  
R  
G  
E  
R  
A  
R  
P  
P  
P  
S  
T  
L  
L  
R  
P  
H  
N  
P  
P  
G  
V  
P  
M  
A  
P  
R  
P  
R  
V  
R  
A  
Q  
P  
S  
G  
P  
S  
 P  
E  
C  
G  
K  
G  
F  
A  
D  
S  
S  
A  
R  
V  
K  
H  
L  
R  
T  
H  
R  
G  
E  
R  
A  
R  
P  
P  
P  
S  
T  
L  
L  
R  
P  
H  
N  
P  
P  
G  
V  
P  
M  
A  
P  
R  
P  
R  
V  
R  
A  
Q  
P  
S  
G  
P  
S  
 P  
E  
C  
G  
K  
G  
F  
A  
D  
S  
S  
A  
R  
V  
K  
H  
L  
R  
T  
H  
R  
G  
E  
R  
A  
R  
P  
P  
P  
S  
T  
L  
L  
R  
P  
H  
N  
P  
P  
G  
V  
P  
M  
A  
P  
R  
P  
R  
V  
R  
A  
Q  
P  
S  
G  
P  
S  
 P  
E  
C  
G  
K  
G  
F  
A  
D  
S  
S  
A  
R  
V  
K  
H  
L  
R  
T  
H  
R  
G  
E  
R  
A  
R  
P  
P  
P  
S  
T  
L  
L  
R  
P  
H  
N  
P  
P  
G  
V  
P  
M  
A  
P  
R  
P  
R  
V  
R  
A  
Q  
P  
S  
G  
P  
S  
 P  
E  
C  
G  
K  
G  
F  
A  
D  
S  
S  
A  
R  
V  
K  
H  
L  
R  
T  
H  
R  
G  
E  
R  
A  
R  
P  
P  
P  
S  
T  
L  
L  
R  
P  
H  
N  
P  
P  
G  
V  
P  
M  
A  
P  
R  
P  
R  
V  
R  
A  
Q  
P  
S  
G  
P  
S  
 P  
E  
C  
G  
K  
G  
F  
A  
D  
S  
S  
A  
R  
V  
K  
H  
L  
R  
T  
H  
R  
G  
E  
R  
A  
R  
P  
P  
P  
S  
T  
L  
L  
R  
P  
H  
N  
P  
P  
G  
V  
P  
M  
A  
P  
R  
P  
R  
V  
R  
A  
Q  
P  
S  
G  
P  
S  
 P  
E  
C  
G  
K  
G  
F  
A  
D  
S  
S  
A  
R  
V  
K  
H  
L  
R  
T  
H  
R  
G  
E  
R  
A  
R  
P  
P  
P  
S  
T  
L  
L  
R  
P  
H  
N  
P  
P  
G  
V  
P  
M  
A  
P  
R  
P  
R  
V  
R  
A  
Q  
P  
S  
G  
P  
S  
 P  
E  
C  
G  
K  
G  
F  
A  
D  
S  
S  
A  
R  
V  
K  
H  
L  
R  
T  
H  
R  
G  
E  
R  
A  
R  
P  
P  
P  
S  
T  
L  
L  
R  
P  
H  
N  
P  
P  
G  
V  
P  
M  
A  
P  
R  
P  
R  
V  
R  
A  
Q  
P  
S  
G  
P  
S  
 P  
E  
C  
G  
K  
G  
F  
A  
D  
S  
S  
A  
R  
V  
K  
H  
L  
R  
T  
H  
Q  
E  
R  
T  
R  
P  
P  
P  
P  
P  
S  
T  
L  
L  
R  
P  
H  
N  
P  
P  
G  
S  
V  
I  
V  
P  
O  
S  
R  
V  
O  
G  
R  
P  
S  
G  
P  
S  
 -----

*AP3D1*

Ac-MGPGPPHGAQPR





|          |  |      |  |              |  |       |  |                   |                                                              |
|----------|--|------|--|--------------|--|-------|--|-------------------|--------------------------------------------------------------|
| 01:9606  |  | 2926 |  | NM_001261826 |  | AP3D1 |  | Homo_sapiens      | KLPIQKHRNTETSKSPEK-DVPMVEKKSKPKKKKEKKHKEKERDKEKKKEKEKKAEDLDF |
| 01:9606  |  | 2926 |  | NM_003938    |  | AP3D1 |  | Homo_sapiens      | KLPIQKHRNTETSKSPEK-DVPMVEKKSKPKKKKEKKHKEKERDKEKKKEKE-----    |
| 04:9913  |  | 2926 |  | NM_173998    |  | AP3D1 |  | Bos_taurus        | KLPVQKHRNAETSKSPEKEDVPLVEKKSKPKKKKEKKHKEKEREKK--KKEVEKGEDLDF |
| 06:10116 |  | 2926 |  | NM_001100719 |  | Ap3d1 |  | Rattus_norvegicus | KLPVQKHRNAETVK SPEKEGVPGEKKSKPKKKKEKKPKEREREK-----KDKKGEDLDF |
| 07:10090 |  | 2926 |  | NM_007460    |  | Ap3d1 |  | Mus_musculus      | KLPVQKHRNAEAVKSPEKEGVLGVEKKSKPKKKKEKKTKEREREK----KDKKGEDLDF  |

|          |  |                 |                                                                                                   |
|----------|--|-----------------|---------------------------------------------------------------------------------------------------|
| 00:1     |  | Ac-MGPGPPHGAQPR | -----                                                                                             |
| 01:9606  |  | 2926            | 0#NP_001248755 AP3D1 Homo_sapiens WLSTTPPPAPAPAPVPSTGELSVNTVTTPKDECEDAKTEAQGEEDDA---EGQDQDKK      |
| 01:9606  |  | 2926            | 0#NP_003929 AP3D1 Homo_sapiens -----KKK                                                           |
| 01:9606  |  | 2926            | NM_001077523 AP3D1 Homo_sapiens WLSTTPPPAPAPAPVPST-----DECEDAKTEAQGEEDDA---EGQDQDKK               |
| 01:9606  |  | 2926            | NM_001261826 AP3D1 Homo_sapiens WLSTTPPPAPAPAPVPSTGELSVNTVTTPKDECEDAKTEAQGEEDDA---EGQDQDKK        |
| 01:9606  |  | 2926            | NM_003938 AP3D1 Homo_sapiens -----KKK                                                             |
| 04:9913  |  | 2926            | NM_173998 AP3D1 Bos_taurus WLSTTPPAATP-----ALEELEVNTTIVTLKE---GQEEPRGEEQDAEEDREQDLEKK             |
| 06:10116 |  | 2926            | NM_001100719 Ap3d1 Rattus_norvegicus WLSTTPPPAAAPVPAP--STEGLAASIVTPPKGECEVLKGEEPQDE---EDHMDHDQERK |
| 07:10090 |  | 2926            | NM_007460 Ap3d1 Mus_musculus WLSTTPPPAAAPIPAP--STEELAASTITSPKDECEVLKGEE-----EDHVDHDQERK           |

|          |  |                 |                                                                                                 |
|----------|--|-----------------|-------------------------------------------------------------------------------------------------|
| 00:1     |  | Ac-MGPGPPHGAQPR | -----                                                                                           |
| 01:9606  |  | 2926            | 0#NP_001248755 AP3D1 Homo_sapiens SPKPKKKKHKRKE--KEERTKGKKKSKKQPPGSEEAAGEPVQNGAPEEEQLPPESSYSLLA |
| 01:9606  |  | 2926            | 0#NP_003929 AP3D1 Homo_sapiens SPKPKKKKHKRKE--KEERTKGKKKSKKQPPGSEEAAGEPVQNGAPEEEQLPPESSYSLLA    |
| 01:9606  |  | 2926            | NM_001077523 AP3D1 Homo_sapiens SPKPKKKKHKRKE--KEERTKGKKKSKKQPPGSEEAAGEPVQNGAPEEEQLPPESSYSLLA   |
| 01:9606  |  | 2926            | NM_001261826 AP3D1 Homo_sapiens SPKPKKKKHKRKE--KEERTKGKKKSKKQPPGSEEAAGEPVQNGAPEEEQLPPESSYSLLA   |
| 01:9606  |  | 2926            | NM_003938 AP3D1 Homo_sapiens SPKPKKKKHKRKE--KEERTKGKKKSKKQPPGSEEAAGEPVQNGAPEEEQLPPESSYSLLA      |
| 04:9913  |  | 2926            | NM_173998 AP3D1 Bos_taurus PSKHKKKKHKHD--KEERPDKRKSKKKVPPADEEAAEPVENGTLLEEPLPMSSYILLA           |
| 06:10116 |  | 2926            | NM_001100719 Ap3d1 Rattus_norvegicus SSRHKKKHKRKE--KEERPRDKKAKRKQ-VVQLENGAPAEEEEEEEPIPPMSSYCLLA |
| 07:10090 |  | 2926            | NM_007460 Ap3d1 Mus_musculus SSRHKKKHKRKEKEKEERPRDKKAKKKQ-VAPLENGAAAE---EEEEPIPPMSSYCLLA        |

|          |  |                 |                                                                                                     |
|----------|--|-----------------|-----------------------------------------------------------------------------------------------------|
| 00:1     |  | Ac-MGPGPPHGAQPR | -----                                                                                               |
| 01:9606  |  | 2926            | 0#NP_001248755 AP3D1 Homo_sapiens ENSYVKMTCDIRGSLQEDSQVTVAIVLENRSSSILKGMELSVLDSL NARMARPQGSSVHD     |
| 01:9606  |  | 2926            | 0#NP_003929 AP3D1 Homo_sapiens ENSYVKMTCDIRGSLQEDSQVTVAIVLENRSSSILKGMELSVLDSL NARMARPQGSSVHD        |
| 01:9606  |  | 2926            | NM_001077523 AP3D1 Homo_sapiens ENSYVKMTCDIRGSLQEDSQVTVAIVLENRSSSILKGMELSVLDSL NARMARPQGSSVHD       |
| 01:9606  |  | 2926            | NM_001261826 AP3D1 Homo_sapiens ENSYVKMTCDIRGSLQEDSQVTVAIVLENRSSSILKGMELSVLDSL NARMARPQGSSVHD       |
| 01:9606  |  | 2926            | NM_003938 AP3D1 Homo_sapiens ENSYVKMTCDIRGSLQEDSQVTVAIVLENRSSSILKGMELSVLDSL NARMARPQGSSVHD          |
| 04:9913  |  | 2926            | NM_173998 AP3D1 Bos_taurus ENSYIKMTYDVQGS LQKDSQVTVSIVLENQSDSFLKSMELNVLDSL NARLARPEGSSVHD           |
| 06:10116 |  | 2926            | NM_001100719 Ap3d1 Rattus_norvegicus ENPYIKVTYDVQAS LQKDSQVTVSIILENQSSSFLKNMELNVLDSL NTKMARPEGSSVHD |
| 07:10090 |  | 2926            | NM_007460 Ap3d1 Mus_musculus ESPYIKVTYDIQAS LQKDSQVTVSIILENQSSSFLKNMELNVLDSL NTKMTRPEGSSVHD         |

|          |  |                 |                                                                                                      |
|----------|--|-----------------|------------------------------------------------------------------------------------------------------|
| 00:1     |  | Ac-MGPGPPHGAQPR | -----                                                                                                |
| 01:9606  |  | 2926            | 0#NP_001248755 AP3D1 Homo_sapiens GVPVPFQLPPGVSNEAQYVFTTIQSI VMAQKLKGTLSFIAKNDEGATHEKLD FRLHFSCSS    |
| 01:9606  |  | 2926            | 0#NP_003929 AP3D1 Homo_sapiens GVPVPFQLPPGVSNEAQYVFTTIQSI VMAQKLKGTLSFIAKNDEGATHEKLD FRLHFSCSS       |
| 01:9606  |  | 2926            | NM_001077523 AP3D1 Homo_sapiens GVPVPFQLPPGVSNEAQYVFTTIQSI VMAQKLKGTLSFIAKNDEGATHEKLD FRLHFSCSS      |
| 01:9606  |  | 2926            | NM_001261826 AP3D1 Homo_sapiens GVPVPFQLPPGVSNEAQYVFTTIQSI VMAQKLKGTLSFIAKNDEGATHEKLD FRLHFSCSS      |
| 01:9606  |  | 2926            | NM_003938 AP3D1 Homo_sapiens GVPVPFQLPPGVSNEAQYVFTTIQSI VMAQKLKGTLSFIAKNDEGATHEKLD FRLHFSCSS         |
| 04:9913  |  | 2926            | NM_173998 AP3D1 Bos_taurus GVPVPFQLPPGISNEAQYVFTTIQSI VMAQKLKGTLSFIAKNDEGSTHEKLD FKLHFTCTS           |
| 06:10116 |  | 2926            | NM_001100719 Ap3d1 Rattus_norvegicus GVPVPFQLPPGVSNEAQYVFTTIQSI VMAQKLKGTLSFIAKDDEGATHEKLD FRLHFSCSS |
| 07:10090 |  | 2926            | NM_007460 Ap3d1 Mus_musculus GVPVPFQLPPGVSNEAQYVFTTIQSI VMAQKLKGTLSFIAKDDEGATHEKLD FRLHFSCSS         |

|          |  |                 |                                                                                                     |
|----------|--|-----------------|-----------------------------------------------------------------------------------------------------|
| 00:1     |  | Ac-MGPGPPHGAQPR | -----                                                                                               |
| 01:9606  |  | 2926            | 0#NP_001248755 AP3D1 Homo_sapiens YLITTPCYSDAFAKLLESGDLSMSSIKVDGIRMSFQNL LAKICFHHHFSVVERVDS CASM    |
| 01:9606  |  | 2926            | 0#NP_003929 AP3D1 Homo_sapiens YLITTPCYSDAFAKLLESGDLSMSSIKVDGIRMSFQNL LAKICFHHHFSVVERVDS CASM       |
| 01:9606  |  | 2926            | NM_001077523 AP3D1 Homo_sapiens YLITTPCYSDAFAKLLESGDLSMSSIKVDGIRMSFQNL LAKICFHHHFSVVERVDS CASM      |
| 01:9606  |  | 2926            | NM_001261826 AP3D1 Homo_sapiens YLITTPCYSDAFAKLLESGDLSMSSIKVDGIRMSFQNL LAKICFHHHFSVVERVDS CASM      |
| 01:9606  |  | 2926            | NM_003938 AP3D1 Homo_sapiens YLITTPCYSDAFAKLLESGDLSMSSIKVDGIRMSFQNL LAKICFHHHFSVVERVDS CASM         |
| 04:9913  |  | 2926            | NM_173998 AP3D1 Bos_taurus YLVTTPCYSDAFAKLLESGDLSMSSIKVDGISMSFHN L LAKICFHHRFSVVERVDS CASM          |
| 06:10116 |  | 2926            | NM_001100719 Ap3d1 Rattus_norvegicus YLITTPCYSDAFAKLLESGDLSMNSIKVDGISISFQNL LAKICFYHHFSVVERVDS CASM |
| 07:10090 |  | 2926            | NM_007460 Ap3d1 Mus_musculus YLITTPCYSDAFAKLLESGDLSMNSIKVDGISMSFQNL LAKICFYHHFSVVERVDS CASM         |

|          |  |                 |                                                                                        |
|----------|--|-----------------|----------------------------------------------------------------------------------------|
| 00:1     |  | Ac-MGPGPPHGAQPR | -----                                                                                  |
| 01:9606  |  | 2926            | 0#NP_001248755 AP3D1 Homo_sapiens YRSRIQGHHVCLLVKKGENSVSVDGKCS DSTLLSNLLEEMKATLAKC     |
| 01:9606  |  | 2926            | 0#NP_003929 AP3D1 Homo_sapiens YRSRIQGHHVCLLVKKGENSVSVDGKCS DSTLLSNLLEEMKATLAKC        |
| 01:9606  |  | 2926            | NM_001077523 AP3D1 Homo_sapiens YRSRIQGHHVCLLVKKGENSVSVDGKCS DSTLLSNLLEEMKATLAKC       |
| 01:9606  |  | 2926            | NM_001261826 AP3D1 Homo_sapiens YRSRIQGHHVCLLVKKGENSVSVDGKCS DSTLLSNLLEEMKATLAKC       |
| 01:9606  |  | 2926            | NM_003938 AP3D1 Homo_sapiens YRSRIQGHHVCLLVKKGENSVSVDGKCS DSTLLSNLLEEMKATLAKC          |
| 04:9913  |  | 2926            | NM_173998 AP3D1 Bos_taurus YRSRIQGHHVCLLVKKGEKSVSVDGKCS DPTLLSNLLEEMKETLATC            |
| 06:10116 |  | 2926            | NM_001100719 Ap3d1 Rattus_norvegicus YRSRIQGHHVCLLVKKGESSVSVDGKCS DATLLSSLLEEMKTTL SQC |
| 07:10090 |  | 2926            | NM_007460 Ap3d1 Mus_musculus YRSRIQGHHVCLLVKKGESSVSVDGKCS DATLLSSLLEEMKTTLAQC          |

*UBE2M*

Ac-AAAAEEAAAAGPR



KTTRQRDEDAKMIKLF<sup>1</sup>TLKQQKKDGEQKGS-----QQKASAAQLRIQKIDINELNLPNTC  
KTTRQRDEDAKMIKLF<sup>1</sup>TLKQQKKDGEQKGS-----QQKASAAQLRIQKIDINELNLPNTC  
-----EKSETMIGL<sup>1</sup>FKV<sup>1</sup>KEKQREQAQN-ATRGGSVKKQSAGELRLHKDISELNLPPSC  
-----EKSETMIGL<sup>1</sup>FKV<sup>1</sup>KEKQREQAQN-ATRGGSVKKQSAGELRLHKDISELNLPPSC  
-----RICNSRTMIGL<sup>1</sup>FKV<sup>1</sup>KEKQREESQSN-ATRGSGATVKKQSAGELRLHKDISELNLPPSC

```

-----
SMRGGYIGSTYFERCLK-
SMRGGYIGSTYFERCLK-
SMRGGYIGSTYFERCLK-
SMRGGYIGSTYFERCLK-
SMRGGYIGSTYFERCLK-
SMRGGYIGSTYFERCLK-
SMRGGYIGSTYFERCLK-
SMRGGYIGSTYFERCLK-
SMRGGYIGSTYFERCLK-
AMRGGCVGETYFECCLK
AMRGGCVGETYFECCLK
AMRGGCVGETYFECCLK
AMTGGYVGQTFPRCI--
AMTGGYVGQTFPRCI--
AMMGQVGQTSFPRCM--

```

*ARRB1*

Ac-AGDFPAWALTPR

CLUSTAL O(1.2.1) multiple sequence alignment

```
00:1|Ac-AGDFPAWALTTPR-----AGDFP
01:9606|2981|0#NP_004032|ARRB1|Homo_sapiens-----
01:9606|2981|0#NP_064647|ARRB1|Homo_sapiens-----
01:9606|2981|NM_004041|ARRB1|Homo_sapiens-----
01:9606|2981|NM_020251|ARRB1|Homo_sapiens-----
04:9913|2981|NM_174243|ARRB1|Bos_taurus-----
06:10116|2981|NM_012910|Arrb1|Rattus_norvegicus-----
07:10090|2981|NM_177231|Arrb1|Mus_musculus-----
07:10090|2981|NM_178220|Arrb1|Mus_musculus-----
10:7955|2981|NM_001159822|arrb1|Danio_rerio-----
10:7955|2981|NM_001159822|arrb1|Danio_rerio-----
12:7227|2981|NM_001260471|krz|Drosophila_melanogaster-----
12:7227|2981|NM_080249|krz|Drosophila_melanogaster-----
13:6239|2981|NM_075782|arr-1|Caenorhabditis_elegans-----
```

```
00:1|Ac-AGDFPAWALTTPR-----
01:9606|2981|0#NP_004032|ARRB1|Homo_sapiens-----MGDKGTRVFKKASPNGKLTV
01:9606|2981|0#NP_064647|ARRB1|Homo_sapiens-----MGDKGTRVFKKASPNGKLTV
01:9606|2981|NM_004041|ARRB1|Homo_sapiens-----AL-----TPRTSLRPSRTMGDKGTRVFKKASPNGKLTV
01:9606|2981|NM_020251|ARRB1|Homo_sapiens-----AL-----TPRTSLRPSRTMGDKGTRVFKKASPNGKLTV
04:9913|2981|NM_174243|ARRB1|Bos_taurus-----AL-----TPRTSPRPRTMGDKGTRVFKKASPNGKLTV
06:10116|2981|NM_012910|Arrb1|Rattus_norvegicus-----PRTSLRPRTMGDKGTRVFKKASPNGKLTV
07:10090|2981|NM_177231|Arrb1|Mus_musculus-----TL-----TPRTSLRPRTMGDKGTRVFKKASPNGKLTV
07:10090|2981|NM_178220|Arrb1|Mus_musculus-----TL-----TPRTSLRPRTMGDKGTRVFKKASPNGKLTV
10:7955|2981|NM_001159822|arrb1|Danio_rerio-----FFQSFSSSFCFASCFFFFYSATLPSSRRVLREPCRTHILAMGDKGTRVFKKASPNGKLTV
10:7955|2981|NM_001159822|arrb1|Danio_rerio-----MGDKGTRVFKKASPNGKLTV
12:7227|2981|NM_001260471|krz|Drosophila_melanogaster-----STGGGSAGDETTGGDASSRRQATRVFKKSSSNGKITV
12:7227|2981|NM_080249|krz|Drosophila_melanogaster-----STGGGSAGDETTGGDASSRRQATRVFKKSSSNGKITV
13:6239|2981|NM_075782|arr-1|Caenorhabditis_elegans-----MVDEDKKSGTRVFKKTSPNGKITT
```

```
00:1|Ac-AGDFPAWALTTPR-----
01:9606|2981|0#NP_004032|ARRB1|Homo_sapiens-----YLGKRDFVDHIDLVPDVGVLVDPEYLKE-RRVYVTLTCAFRYGREDLDVLGLTFRKDL
01:9606|2981|0#NP_064647|ARRB1|Homo_sapiens-----YLGKRDFVDHIDLVPDVGVLVDPEYLKE-RRVYVTLTCAFRYGREDLDVLGLTFRKDL
01:9606|2981|NM_004041|ARRB1|Homo_sapiens-----YLGKRDFVDHIDLVPDVGVLVDPEYLKE-RRVYVTLTCAFRYGREDLDVLGLTFRKDL
01:9606|2981|NM_020251|ARRB1|Homo_sapiens-----YLGKRDFVDHIDLVPDVGVLVDPEYLKE-RRVYVTLTCAFRYGREDLDVLGLTFRKDL
04:9913|2981|NM_174243|ARRB1|Bos_taurus-----YLGKRDFVDHIDLVEPVDGVLVDPEYLKE-RRVYVTLTCAFRYGREDLDVLGLTFRKDL
06:10116|2981|NM_012910|Arrb1|Rattus_norvegicus-----YLGKRDFVDHIDLVPDVGVLVDPEYLKE-RRVYVTLTCAFRYGREDLDVLGLTFRKDL
07:10090|2981|NM_177231|Arrb1|Mus_musculus-----YLGKRDFVDHIDLVPDVGVLVDPEYLKE-RRVYVTLTCAFRYGREDLDVLGLTFRKDL
07:10090|2981|NM_178220|Arrb1|Mus_musculus-----YLGKRDFVDHIDLVPDVGVLVDPEYLKE-RRVYVTLTCAFRYGREDLDVLGLTFRKDL
10:7955|2981|NM_001159822|arrb1|Danio_rerio-----YLGKRDFVDHIDLVEPVDGVLVDPEYLKE-RKVFTVLTCAFRYGREDLDVLGLTFRKDL
10:7955|2981|NM_001159822|arrb1|Danio_rerio-----YLGKRDFVDHIDLVEPVDGVLVDPEYLKE-RKVFTVLTCAFRYGREDLDVLGLTFRKDL
12:7227|2981|NM_001260471|krz|Drosophila_melanogaster-----YLGKRDFVDHVTHVDPIDGVVFDPEYVKD-RKVFGQVLAAFRYGREDLDVLGLTFRKDL
12:7227|2981|NM_080249|krz|Drosophila_melanogaster-----YLGKRDFVDHVTHVDPIDGVVFDPEYVKD-RKVFGQVLAAFRYGREDLDVLGLTFRKDL
13:6239|2981|NM_075782|arr-1|Caenorhabditis_elegans-----YLGKRDFIDRGDYVDLIDGMVLIDEEYIKDNRKVTAAHLLAAFRYGREDLDVLGLTFRKDL
```

```
00:1|Ac-AGDFPAWALTTPR-----
01:9606|2981|0#NP_004032|ARRB1|Homo_sapiens-----FVANVQSFPAPPE-DKKPLTRLQERLIKKLGEHAYPFTFEIPPNLPCSVTLQPGPEDTGK
01:9606|2981|0#NP_064647|ARRB1|Homo_sapiens-----FVANVQSFPAPPE-DKKPLTRLQERLIKKLGEHAYPFTFEIPPNLPCSVTLQPGPEDTGK
01:9606|2981|NM_004041|ARRB1|Homo_sapiens-----FVANVQSFPAPPE-DKKPLTRLQERLIKKLGEHAYPFTFEIPPNLPCSVTLQPGPEDTGK
01:9606|2981|NM_020251|ARRB1|Homo_sapiens-----FVANVQSFPAPPE-DKKPLTRLQERLIKKLGEHAYPFTFEIPPNLPCSVTLQPGPEDTGK
04:9913|2981|NM_174243|ARRB1|Bos_taurus-----FVANVQSFPAPPE-DKKPLTRLQERLIKKLGEHAYPFTFEIPPNLPCSVTLQPGPEDTGK
06:10116|2981|NM_012910|Arrb1|Rattus_norvegicus-----FVANVQSFPAPPE-DKKPLTRLQERLIKKLGEHAYPFTFEIPPNLPCSVTLQPGPEDTGK
07:10090|2981|NM_177231|Arrb1|Mus_musculus-----FVANVQSFPAPPE-DKKPLTRLQERLIKKLGEHACPFTEIPPNLPCSVTLQPGPEDTGK
07:10090|2981|NM_178220|Arrb1|Mus_musculus-----FVANVQSFPAPPE-DKKPLTRLQERLIKKLGEHACPFTEIPPNLPCSVTLQPGPEDTGK
10:7955|2981|NM_001159822|arrb1|Danio_rerio-----FVANIQAFFPVPE-EKKSLTRLQERLIKKLGEHAYPFTFEIPPNLPCSVTLQPGPEDTGK
10:7955|2981|NM_001159822|arrb1|Danio_rerio-----FVANIQAFFPVPE-EKKSLTRLQERLIKKLGEHAYPFTFEIPPNLPCSVTLQPGPEDTGK
12:7227|2981|NM_001260471|krz|Drosophila_melanogaster-----YLAHEQIYPPMQL--DRPMTRLQERLIKKLGPNAHPFYFEVPPYCPASVSLQAPAGDVGK
12:7227|2981|NM_080249|krz|Drosophila_melanogaster-----YLAHEQIYPPMQL--DRPMTRLQERLIKKLGPNAHPFYFEVPPYCPASVSLQAPAGDVGK
13:6239|2981|NM_075782|arr-1|Caenorhabditis_elegans-----ISETFQVYPQTDKSIISRPLSRLQERLKRKLGANAFPWFWEVAPKSASSVTLQAPAGDTGK
```

```
00:1|Ac-AGDFPAWALTTPR-----
01:9606|2981|0#NP_004032|ARRB1|Homo_sapiens-----ACGVDYEVKAFCAENLE-----EKIHKRNSVRLVIRKVQYAPERPGPQPTAETTRQFLM
01:9606|2981|0#NP_064647|ARRB1|Homo_sapiens-----ACGVDYEVKAFCAENLE-----EKIHKRNSVRLVIRKVQYAPERPGPQPTAETTRQFLM
01:9606|2981|NM_004041|ARRB1|Homo_sapiens-----ACGVDYEVKAFCAENLE-----EKIHKRNSVRLVIRKVQYAPERPGPQPTAETTRQFLM
01:9606|2981|NM_020251|ARRB1|Homo_sapiens-----ACGVDYEVKAFCAENLE-----EKIHKRNSVRLVIRKVQYAPERPGPQPTAETTRQFLM
04:9913|2981|NM_174243|ARRB1|Bos_taurus-----ACGVDYEVKAFCAENLE-----EKIHKRNSVRLVIRKVQYAPERPGPQPTAETTRQFLM
06:10116|2981|NM_012910|Arrb1|Rattus_norvegicus-----ACGVDYEVKAFCAENLE-----EKIHKRNSVRLVIRKVQYAPERPGPQPTAETTRQFLM
07:10090|2981|NM_177231|Arrb1|Mus_musculus-----ACGVDYEVKAFCAENLE-----EKIHKRNSVRLVIRKVQYAPERPGPQPTAETTRQFLM
07:10090|2981|NM_178220|Arrb1|Mus_musculus-----ACGVDYEVKAFCAENLE-----EKIHKRNSVRLVIRKVQYAPERPGPQPTAETTRQFLM
10:7955|2981|NM_001159822|arrb1|Danio_rerio-----ACGVDYEVKAFCAENLE-----EKIHKRNSVRLVIRKVQYAPERPGPQPTAETTRQFLM
10:7955|2981|NM_001159822|arrb1|Danio_rerio-----ACGVDYEVKAFCAENLE-----EKIHKRNSVRLVIRKVQYAPERPGPQPTAETTRQFLM
12:7227|2981|NM_001260471|krz|Drosophila_melanogaster-----SCGVDYELKAFVGENVE-----DKPHKRNSVRLTIRKVMYAPSRVGEQPSIEVSKEFMM
12:7227|2981|NM_080249|krz|Drosophila_melanogaster-----SCGVDYELKAFVGENVE-----DKPHKRNSVRLTIRKVMYAPSRVGEQPSIEVSKEFMM
13:6239|2981|NM_075782|arr-1|Caenorhabditis_elegans-----PCGVDYELKTFVAVTDGSSGEKPKKSALSNTVRLAIRKLTYPAFESRQPMPVDVSKYFMM
```

```
00:1|Ac-AGDFPAWALTTPR-----
01:9606|2981|0#NP_004032|ARRB1|Homo_sapiens-----SDKPLHLEASLDKEIYYHGEPISVNVHVNTNNTKTVKKIKISVRQYADICLFNTAQYKCP
01:9606|2981|0#NP_064647|ARRB1|Homo_sapiens-----SDKPLHLEASLDKEIYYHGEPISVNVHVNTNNTKTVKKIKISVRQYADICLFNTAQYKCP
```

SDKPLHLEASLDKEIYYHGEPISVNVHVTNNTNKTVKKKIKISVRQYADICLFNTAQYKCP  
KPNKIHLEATLDKELYHHGEEKISVNVHVANNSSRTVKKKIKVCVRQFADICLFSTAQYKSV  
KPNKIHLEATLDKELYHHGEEKISVNVHVANNSSRTVKKKIKVCVRQFADICLFSTAQYKSV  
SSGLLHMEVSLDKEMYHHGESISVNVHVIQNNSSNKTVKKKIKIYIQVADICLFTTASYSCS

```
VAMEEADD--TVAPSSSTFCKYVYTLTPFLANNREKRGALDGLKHKHEDTNLASSTLLREGA  
VAMEEADD--TVAPSSSTFCKYVYTLTPFLANNREKRGALDGLKHKHEDTNLASSTLLREGA  
VAMEEADD--TVAPSSSTFCKYVYTLTPFLANNREKRGALDGLKHKHEDTNLASSTLLREGA  
VAMEEADD--TVAPSSSTFCKYVYTLTPFLANNREKRGALDGLKHKHEDTNLASSTLLREGA  
VAMEEADD--TVAPSSSTFCKYVYTLTPFLANNREKRGALDGLKHKHEDTNLASSTLLREGA  
VAMEEADD--TVAPSSSTFCKYVYTLTPFLANNREKRGALDGLKHKHEDTNLASSTLLREGA  
VAMEEADD--TVAPSSSTFCKYVYTLTPFLANNREKRGALDGLKHKHEDTNLASSTLLREGA  
VAMEEADD--NVAPSSTFCKYVYTLTPFLANNREKRGALDGLKHKHEDTNLASSTLLREGA  
VAMEEADD--NVAPSSTFCKYVYTLTPFLANNREKRGALDGLKHKHEDTNLASSTLLREGA  
VAIEESDD--IVAPSATFCKYVYTLTPFLANNREKRGALDGLKHKHEDTNLASSTLLREGA  
VAIEESDD--IVAPSATFCKYVYTLTPFLANNREKRGALDGLKHKHEDTNLASSTLLREGA  
VAIESESDGQVAPGFTLSKFVELCPLLANNKDKGWLGALDGQLKHEDTNLASSTLTNPA  
VAIESESDGQVAPGFTLSKFVELCPLLANNKDKGWLGALDGQLKHEDTNLASSTLTNPA  
VARIESNEGFPVGPTLSKFVAVCPCLTNNKDKRGALDGLKHKHEDTNLASSTILDSKT
```

```

-----EVPENETPVDTNLIEFD-----TNDDDIVFEDFARQLKLG
-----EVPENETPVDTNLIEFD-----TNDDDIVFEDFARQLKLG
-----EVPENETPVDTNLIEFD-----TNDDDIVFEDFARQLKLG
-----EVPENETPVDTNLIEFD-----TNDDDIVFEDFARQLKLG
-----EVPEHETPVDTNLIEFD-----TNDDDIVFEDFARQLKLG
-----EVPESETPVDTNLIEFD-----TNDDDIVFEDFARQLKLG
-----EVPESETPVDTNLIEFD-----TNDDDIVFEDFARQLKLG
-----EVPESETPVDTNLIEFD-----TNDDDIVFEDFARQLKLG
-----DAPENDAPIDTNLIEFD-----TNDDDIVFEDFARQLKLG
-----DAPENDAPIDTNLIEFD-----TNDDDIVFEDFARQLKLG
ASLAGGGLPLVMSDGETESATGGQDVPTTNNLIQLQD-----EAQDDDIVFEDFARQLKLG
ASLAGGGLPLVMSDGETESATGGQDVPTTNNLIQLQD-----EAQDDDIVFEDFARQLKLG
-----DRGLPSI-----EATNGSEPVIDLIQLHEEPYDDDLIFEDFARMRLHG

```

```

-----
MKDDKEEEEEDGTGSPQLNNR
MKDDKEEEEEDGTGSPQLNNR
MKDDKEEEEEDGTGSPQLNNR
MKDDKEEEEEDGTGSPQLNNR
MKDDKEEEEEDGTGSPRLNDR
MKDDKDEEDDGTGSPHLNNR
MKDDKDEEDDGTGSPHLNNR
MKDDKDEEDDGTGSPHLNNR
AKDDKDEDEEGADSPKLNDR
AKDDKDEDEEGADSPKLNDR
AETEA-----
AETEA-----
NDSEDQPSANLPSSL--

```

***OXSR1***

Ac-SEVSEFEGGPR



AVVQAAPFCAPKKEKVAIKRINLEKQTSMDELLKEIQAMSCQHNPVSVSYTTSFVVKDEL  
AVVHGAYCIPRNEKCAIKRINLEKWNTSMDELLKEIQAMSCFHENVVTYHTSFVVREEL  
AVVHGAYCIPRNEKCAIKRINLEKWNTSMDELLKEIQAMSCFHENVVTYHTSFVVREEL  
AVVHGAYCIPRNEKCAIKRINLEKWNTSMDELLKEIQAMSCFHENVVTYHTSFVVREEL  
AVVHGAYCIPRNEKCAIKRINLEKWNTSMDELLKEIQAMSCFHENVVTYHTSFVVREEL  
AVVHGAYCIPRNEKCAIKRINLEKWNTSMDELLKEIQAMSCFHENVVTYHTSFVVREEL  
AVVHGAYCIPRNEKCAIKRINLEKWNTSMDELLKEIQAMSCFHENVVTYHTSFVVREEL  
AVVHGAYCIPRNEKCAIKRINLEKWNTSMDELLKEIQAMSCFHENVVTYHTSFVVREEL  
-----MSQCNPVSVSYTTSFIAQEEL  
ATVTFAYCLPRNEKVAIKCINLEKQTSVDLSHEIQAMSCQNPVSVSYTTSFIAQEEL  
ATVTFAYCLPRNEKVAIKCINLEKQTSVDLSHEIQAMSCQNPVSVSYTTSFIAQEEL

WLVMLKLLSGGSVLDDIIKHIVAK---GEHKSGLVDESTIATILREVLEGLEYLHKNGQIHR  
WLVMLKLLSGGSVLDDIIKHIVAK---GEHKSGLVDESTIATILREVLEGLEYLHKNGQIHR  
WLVMLKLLSGGSVLDDIIKHIVAK---GEHKSGLVDESTIATILREVLEGLEYLHKNGQIHR  
WLVMLKLLSGGSVLDDIIKHIVAK---GEHKNGVLDEATIATILKEVLEGLEYLHKNGQIHR  
WLVMLKLLSGGSVLDDIIKHIVAK---GEHKGVLDESTIATILREVLEGLEYLHKNGQIHR  
WLVMLKLLSGGSVLDDIIKHIVAK---GEHKSGLVDEPTIATILREVLEGLEYLHKNGQIHR  
WLVMLKLLSGGSVLDDIIKHIAK---GEHKNGVLDEASITATMLKEVLEGLEYLHKNGQIHR  
WLVLRLLGGSSLLDDIIKHKMRTS---NCKQGVFDEATIATVLKEVLKGLEYPHNSNGQIHR  
WLVLRLLGGSSLLDDIIKHKMRTS---NCKQGVFDEATIATVLKEVLKGLEYPHNSNGQIHR  
WLVLRLLGGSSLLDDIIKHKMRTS---NCKQGVFDEATIATVLKEVLKGLEYPHNSNGQIHR  
WLVLRLLGGSSLLDDIIKHKMRTS---NCKQGVFDEATIATVLKEVLKGLEYPHNSNGQIHR  
WLVLRLLGGSSLLDDIIKHKMRTS---NCKQGVFDEATIATVLKEVLKGLEYPHNSNGQIHR  
WLVLRLLGGSSLLDDIIKHKMRTS---NCKQGVFDEATIATVLKEVLKGLEYPHNSNGQIHR  
WVVMRLNCGSMULDILKRKVKAIKEQAQFGLDEVSIATVLREVLEKLEYPHNLNGQIHR  
WVVMRLNCGSMULDILKRKVKAIKEQAQFGLDEVSIATVLREVLEKLEYPHNLNGQIHR  
WVVMRLNCGSMULDILKRKVKAIKEQAQFGLDEVSIATVLREVLEKLEYPHNLNGQIHR

DVKAGNILLGEDGSVQIADFVGSFAFLA-TGGDITRNKVRKTFVGTGTCWMAPEVMEVQVRGY  
DVKAGNILLGEDGSVQIADFVGSFAFLA-TGGDITRNKVRKTFVGTGTCWMAPEVMEVQVRGY  
DVKAGNILLGEDGSVQIADFVGSFAFLA-TGGDITRNKVRKTFVGTGTCWMAPEVMEVQVRGY  
DVKAGNILLGEDGSVQIADFVGSFAFLA-TGGDITRNKVRKTFVGTGTCWMAPEVMEVQVRGY  
DVKAGNILLGEDGSVQIADFVGSFAFLA-TGGDITRNKVRKTFVGTGTCWMAPEVMEVQVRGY  
DVKAGNILLGEDGSVQIADFVGSFAFLA-TGGDITRNKVRKTFVGTGTCWMAPEVMEVQVRGY  
DVKAGNILLGEDGSVQIADFVGSFAFLA-TGGDITRNKVRKTFVGTGTCWMAPEVMEVQVRGY  
DIKAGNILIGDDGTIQIADFVGSAWLA-TGRDLSRQKVRHTFVGTGTCWMAPEVMEQDHYG  
DIKAGNILIGDDGTIQIADFVGSAWLA-TGRDLSRQKVRHTFVGTGTCWMAPEVMEQDHYG  
DIKAGNILIGDDGTIQIADFVGSAWLA-TGRDLSRQKVRHTFVGTGTCWMAPEVMEQDHYG  
DIKAGNILIGDDGTIQIADFVGSAWLA-TGRDLSRQKVRHTFVGTGTCWMAPEVMEQDHYG  
DIKAGNILIGDDGTIQIADFVGSAWLA-TGRDLSRQKVRHTFVGTGTCWMAPEVMEQDHYG  
DIKAGNILIGDDGTIQIADFVGSAWLA-TGRDLSRQKVRHTFVGTGTCWMAPEVMEQDHYG  
DIKAGNILIGDDGTIQIADFVGSAWLA-TGRDLSRQKVRHTFVGTGTCWMAPEVMEQDHYG  
DIKAGNILLADDGTIQIADFVSGWLASSGGDLSRQKVRHTFVGTGTCWMAPEVMEVQVQGY  
DIKAGNILLADDGTIQIADFVSGWLASSGGDLSRQKVRHTFVGTGTCWMAPEVMEVQVQGY  
DIKAGNILLADDGTIQIADFVSGWLASSGGDLSRQKVRHTFVGTGTCWMAPEVMEVQVQGY

DFKADIWSFGITAI ELATGAAPYHKYPPMKVLM LTLQNDPPSLETGVQDK EMLKKYKGSF  
DFKADIWSFGITAI ELATGAAPYHKYPPMKVLM LTLQNDPPSLETGVQDK EMLKKYKGSF  
DFKADIWSFGITAI ELATGAAPYHKYPPMKVLM LTLQNDPPSLETGVQDK EMLKKYKGSF  
DFKADIWSFGITAI ELATGAAPYHKYPPMKVLM LTLQNDPPSLETGVQDK EMLKKYKGSF  
DFKADIWSFGITAI ELATGAAPYHKYPPMKVLM LTLQNDPPSLDTGVQDK EMLKKYKGSF  
DFKADIWSFGITAI ELATGAAPYHKYPPMKVLM LTLQNDPPSLETGVQDK EMLKKYKGSF  
DFKADIWSFGITAI ELATGAAPYHKYPPMKVLM LTLQNDPPTLETGVQDK EMLKKYKGSF  
DFKADIWSFGITAI EMATGTAPYHKYPPMKVLM LTLQNDPPTLDTGADK DQYKAYGKTF  
DFKADIWSLGLIAI ELATGTAPYHKYPPMKVLM LTLQNDPPTLETNAERK DQYKAYGKSF  
DFKADIWSLGLIAI ELATGTAPYHKYPPMKVLM LTLQNDPPTLETNAERK DQYKAYGKSF  
DFKADIWSLGLIAI ELATGTAPYHKYPPMKVLM LTLQNDPPTLETNAERK DQYKAYGKSF

RKMISLCLQKDPEKRPTAAELLRHKKFFQAKNKEFLQEKILQRAPTISERAKK--VRRVPG  
RKMISLCLQKDPEKRPTAAELLRHKKFFQAKNKEFLQEKILQRAPTISERAKK--VRRVPG  
RKMISLCLQKDPEKRPTAAELLRHKKFFQAKNKEFLQEKILQRAPTISERAKK--VRRVPG  
RKMISLCLQKDPEKRPTAAELLRHKKFFQAKNKEFLQEKILQRAPTISERAKK--VRRVPG  
RKMISLCLQKDPEKRPTAAELLRHKKFFQAKNKEFLQEKILQRAPTISERSKK--VRRVPG  
RKMISLCLQKDPEKRPTAAELLRHKKFFQAKNKEFLQEKILQRAPTISERSKK--VRRVPG  
RKMISLCLQKDPEKRPTAAELLRHKKFFQAKNKEFLHERLLQKGPTIAERGGK--VRRVPG  
RKMIVECLQKPSKRPTASELLKHAFKKAKDRKYLTQTLLQSGSPMETRVHKAARKRQPG  
RKMIVECLQKPSKRPTASELLKHAFKKAKDRKYLTQTLLQSGSPMETRVHKAARKRQPG  
RKMIVECLQKPSKRPTASELLKHAFKKAKDRKYLTQTLLQSGSPMETRVHKAARKRQPG  
RKMIVECLQKPSKRPTASELLKHAFKKAKDRKYLTQTLLQSGSPMETRVHKAARKRQPG  
RKMIVECLQKPSKRPTASELLKHAFKKAKDRKYLTQTLLQSGSPMETRVHKAARKRQPG  
KTLIRDCLQKDPAKRPTASELLKYSFFKKGDKKYLVTLLIENLASVPVVAHHSSK--KV  
KTLIRDCLQKDPAKRPTASELLKYSFFKKGDKKYLVTLLIENLASVPVVAHHSSK--KV  
KTLIRDCLQKDPAKRPTASELLKYSFFKKGDKKYLVTLLIENLASVPVVAHHSSK--KV

|          |       |                    |                         |
|----------|-------|--------------------|-------------------------|
| 01:9606  | 31288 | 0#NP_005100 OXSR1  | Homo_sapiens            |
| 01:9606  | 31288 | NM_005109 OXSR1    | Homo_sapiens            |
| 03:9544  | 31288 | NM_001257780 OXSR1 | Macaca_mulatta          |
| 04:9913  | 31288 | NM_001075892 OXSR1 | Bos_taurus              |
| 06:10116 | 31288 | NM_001108194 Oxsr1 | Rattus_norvegicus       |
| 07:10090 | 31288 | NM_133985 Oxsr1    | Mus_musculus            |
| 09:8364  | 31288 | NM_001001224 stk39 | Xenopus_tropicalis      |
| 12:7227  | 31288 | NM_001144605 fray  | Drosophila_melanogaster |
| 12:7227  | 31288 | NM_001144606 fray  | Drosophila_melanogaster |
| 12:7227  | 31288 | NM_001144607 fray  | Drosophila_melanogaster |
| 12:7227  | 31288 | NM_001300466 fray  | Drosophila_melanogaster |
| 12:7227  | 31288 | NM_057960 fray     | Drosophila_melanogaster |
| 12:7227  | 31288 | NM_169823 fray     | Drosophila_melanogaster |
| 13:6239  | 31288 | NM_001136446 gck-3 | Caenorhabditis_elegans  |
| 13:6239  | 31288 | NM_001269833 gck-3 | Caenorhabditis_elegans  |
| 13:6239  | 31288 | NM_075116 gck-3    | Caenorhabditis_elegans  |

|          |       |              |       |                         |
|----------|-------|--------------|-------|-------------------------|
| 01:9606  | 31288 | 0#NP_005100  | OXSR1 | Homo_sapiens            |
| 01:9606  | 31288 | NM_005109    | OXSR1 | Homo_sapiens            |
| 03:9544  | 31288 | NM_001257780 | OXSR1 | Macaca_mulatta          |
| 04:9913  | 31288 | NM_001075892 | OXSR1 | Bos_taurus              |
| 06:10116 | 31288 | NM_001108194 | Oxsr1 | Rattus_norvegicus       |
| 07:10090 | 31288 | NM_133985    | Oxsr1 | Mus_musculus            |
| 09:8364  | 31288 | NM_001001224 | stk39 | Xenopus_tropicalis      |
| 12:7227  | 31288 | NM_001144605 | fray  | Drosophila_melanogaster |
| 12:7227  | 31288 | NM_001144606 | fray  | Drosophila_melanogaster |
| 12:7227  | 31288 | NM_001144607 | fray  | Drosophila_melanogaster |
| 12:7227  | 31288 | NM_001300466 | fray  | Drosophila_melanogaster |
| 12:7227  | 31288 | NM_057960    | fray  | Drosophila_melanogaster |
| 12:7227  | 31288 | NM_169823    | fray  | Drosophila_melanogaster |
| 13:6239  | 31288 | NM_001136446 | gck-3 | Caenorhabditis_elegans  |
| 13:6239  | 31288 | NM_001269833 | gck-3 | Caenorhabditis_elegans  |
| 13:6239  | 31288 | NM_075116    | gck-3 | Caenorhabditis_elegans  |

|          |       |                                           |
|----------|-------|-------------------------------------------|
| 01:9606  | 31288 | 0#NP_005100 OXSR1 Homo_sapiens            |
| 01:9606  | 31288 | NM_005109 OXSR1 Homo_sapiens              |
| 03:9544  | 31288 | NM_001257780 OXSR1 Macaca_mulatta         |
| 04:9913  | 31288 | NM_001075892 OXSR1 Bos_taurus             |
| 06:10116 | 31288 | NM_001108194 Oxsr1 Rattus_norvegicus      |
| 07:10090 | 31288 | NM_133985 Oxsr1 Mus_musculus              |
| 09:8364  | 31288 | NM_001001224 stk39 Xenopus_tropicalis     |
| 12:7227  | 31288 | NM_001144605 fray Drosophila_melanogaster |
| 12:7227  | 31288 | NM_001144606 fray Drosophila_melanogaster |
| 12:7227  | 31288 | NM_001144607 fray Drosophila_melanogaster |
| 12:7227  | 31288 | NM_001300466 fray Drosophila_melanogaster |
| 12:7227  | 31288 | NM_057960 fray Drosophila_melanogaster    |
| 12:7227  | 31288 | NM_169823 fray Drosophila_melanogaster    |
| 13:6239  | 31288 | NM_001136446 gck-3 Caenorhabditis_elegans |
| 13:6239  | 31288 | NM_001269833 gck-3 Caenorhabditis_elegans |
| 13:6239  | 31288 | NM_075116 gck-3 Caenorhabditis_elegans    |

|          |       |              |       |                         |
|----------|-------|--------------|-------|-------------------------|
| 01:9606  | 31288 | 0#NP_005100  | OXSR1 | Homo_sapiens            |
| 01:9606  | 31288 | NM_005109    | OXSR1 | Homo_sapiens            |
| 03:9544  | 31288 | NM_001257780 | OXSR1 | Macaca_mulatta          |
| 04:9913  | 31288 | NM_001075892 | OXSR1 | Bos_taurus              |
| 06:10116 | 31288 | NM_001108194 | Oxsr1 | Rattus_norvegicus       |
| 07:10090 | 31288 | NM_133985    | Oxsr1 | Mus_musculus            |
| 09:8364  | 31288 | NM_001001224 | stk39 | Xenopus_tropicalis      |
| 12:7227  | 31288 | NM_001144605 | fray  | Drosophila_melanogaster |
| 12:7227  | 31288 | NM_001144606 | fray  | Drosophila_melanogaster |
| 12:7227  | 31288 | NM_001144607 | fray  | Drosophila_melanogaster |
| 12:7227  | 31288 | NM_001300466 | fray  | Drosophila_melanogaster |
| 12:7227  | 31288 | NM_057960    | fray  | Drosophila_melanogaster |
| 12:7227  | 31288 | NM_169823    | fray  | Drosophila_melanogaster |
| 13:6239  | 31288 | NM_001136446 | gck-3 | Caenorhabditis_elegans  |
| 13:6239  | 31288 | NM_001269833 | gck-3 | Caenorhabditis_elegans  |
| 13:6239  | 31288 | NM_075116    | gck-3 | Caenorhabditis_elegans  |

LQVPEQISAHLPQPAGQIATQPTQVSLPPTAEPAKTAQAL-----SSSGSGSQETKIPI  
LQVPEQISAHLPQPAGQIATQPTQVSLPPTAEPAKTAQAL-----SSSGSGSQETKIPI  
LQVPEQISAHLPQPAGQMPTQPTQVSLPPTAEPAKTAQAL-----SSSGSGSQETKIPI  
LQVPEQISAHLPQPAGTPPQPTQVSLPPTAEPAIAAAL-----SSGAGSQETKIPI  
LQVPEQISAHLPQASQMPTQPAQVSLPPTAEPAKPAQAR-----SSGERSQETKVPI  
LQVPEQISAHLPQPAGQMPTQPAQVSLPPTAEPAKPAQAQ-----SSGERSQETKIPI  
LQTPAQPSANLPQPAGQAPPSQVSPVPPTQATLAAA-----PPPAEQEPKAAI  
REEPSPEITHSVSSA---TVTP---GAPAAAGAGAAQELTAGIAQLPLPSEAAGEAPPV  
REEPSPEITHSVSSA---TVTP---GAPAAAGAGAAQELTAGIAQLPLPSEAAGEAPPV  
REEPSPEITHSVSSA---TVTP---GAPAAAGAGAAQELTAGIAQLPLPSEAAGEAPPV  
REEPSPEITHSVSSA---TVTP---GAPAAAGAGAAQELTAGIAQLPLPSEAAGEAPPV  
REEPSPEITHSVSSA---TVTP---GAPAAAGAGAAQELTAGIAQLPLPSEAAGEAPPV  
REEPSPEITHSVSSA---TVTP---GAPAAAGAGAAQELTAGIAQLPLPSEAAGEAPPV  
REKKKKKASASASAGAGAAGAAG---GATGGAASGAPSAQEGGGATT-----CPETL  
REKKKKKASASASAGAGAAGAAG---GATGGAASGAPSAQEGGGATT-----CPETL  
REKKKKKASASASAGAGAAGAAG---GATGGAASGAPSAQEGGGATT-----CPETL

SLVLRRLNSKKELNDIRFEFTPGRDTAEGVSQELISAGLVDRDLVIVAANLQKIVE---  
 SLVLRRLNSKKELNDIRFEFTPGRDTAEGVSQELISAGLVDRDLVIVAANLQKIVE---  
 SLVLRRLNSKKELNDIRFEFTPGRDTAEGVSQELISAGLVDRDLVIVAANLQKIVE---  
 SLVLRRLNSKKELNDIRFEFTPGRDTAEGVSQELISAGLVDRDLVIVAANLQKIVE---  
 SLVLRRLNSKKELNDIRFEFTPGRDTAEGVSQELISAGLVDRDLVIVAANLQKIVE---  
 SLVLRRLNSKKELNDIRFEFTPGRDTAEGVSQELISAGLVDRDLVIVAANLQKIVE---  
 SLVLRRLNTKKEELNDIRFEFTPGRDTADGVSQELISAGLVDRDLVIVAANLQKIVD---  
 NLVLRMRNLRELHDIRFEFVVGKDTAEGIA TELVDAGLVDALDTPMPATHLDQLIA---  
 NLVLRMRNLRELHDIRFEFVVGKDTAEGIA TELVDAGLVDALDTPMPATHLDQLIA---  
 NLVLRMRNLRELHDIRFEFVVGKDTAEGIA TELVDAGLVDALDTPMPATHLDQLIA---  
 NLVLRMRNLRELHDIRFEFVVGKDTAEGIA TELVDAGLVDALDTPMPATHLDQLIA---  
 NLVLRMRNLRELHDIRFEFVVGKDTAEGIA TELVDAGLVDALDTPMPATHLDQLIA---  
 NLVLRMRNLRELHDIRFEFVVGKDTAEGIA TELVDAGLVDALDTPMPATHLDQLIA---  
 NMVLRVRNQRELNDIKFDYTKSADTVEGIAHELVTAE LIDCHDLVIVAANLQKLIDFAE  
 NMVLRVRNQRELNDIKFDYTKSADTGTGEY---FTFKSYCEARE---  
 NMVLRVRNQRELNDIKFDYTKSADTVEGIAHELVTAE LIDCHDLVIVAANLQKLIDFAE

*APPBP2*

Ac-MEGGGGLREEEAEEAEEEGR



```

-----YIAESDSAVKKEKAIQIGFVLGGFLSDAGWYSDAEKVFLSCLQLCT-LHDEILHWF
-----YIAESDAHVKEKAIQIGFVLGGFLSDAGWYSDAEKVFLSCLQLCT-LHDEVLHWY
DAINDSGLEELSAVELQVIDLGLRLGSFLSEAGWMQESITV-LACLNVRCLKDPLTHKHWL
DAINDSGLEELSAVELQVIDLGLRLGSFLSEAGWMQESITV-LACLNVRCLKDPLTHKHWL
DAINDSGLEELSAVELQVIDLGLRLGSFLSEAGWMQESITV-LACLNVRCLKDPLTHKHWL

```

R-AVECCVRLHVRNGNCKYHLGEETFFLAQTYMDKLSKHGQQANKAALYGELCALLFAK  
R-AVECCVRLHVRNGNCKYHLGEETFFLAQTYMDKLSKHGQQANKAALYGELCALLFAK  
R-AVECCVRLHVRNGNCKYHLGEETFFLAQTYMDKLSKHGQQANKAALYGELCALLFAK  
R-AVECCVRLHVRNGNCKYHLGEETFFLAQTYMDKLSKHGQQANKAALYGELCALLFAK  
R-AVECCVRLHVRNGNCKYHLGEETFFLAQTYMDKLSKHGQQANKAALYGELCALLFAK  
R-AVECCVRLHVRNGNCKYHLGEETFFLAQTYMDKLSKHGQQANRAALYGELCALLFAK  
R-AVECCVRLHVRNGNCKYHLGEETFFLAQTYMDKLSKHGQQANRAALYGELCALLFAK  
R-AVECCVRLHVRNGNCKYHLGEETFFLAQSYMDKLAKHGHQANKAALYGELCALLFAK  
R-AVECCVRLHVRNGNCKYHLGEETFFLAQSYMDKLAKHGHQANKAALYGELCALLFAK  
QFRLDCLQRLLYAESAHCNFKEAEKTYAELMGLNKLWNKSVPNQLVAITYSQISAMYFAR  
QFRLDCLQRLLYAESAHCNFKEAEKTYAELMGLNKLWNKSVPNQLVAITYSQISAMYFAR  
QFRLDCLQRLLYAESAHCNFKEAEKTYAELMGLNKLWNKSVPNQLVAITYSQISAMYFAR

-----  
FGSKHPKYSDTLLDYGFYLLNVDNICQSVAIYQAALDIRQSVFGGKNIHVATAHEDLAYS  
FGSKHPKYSDTLLDYGFYLLNVDNICQSVAIYQAALDIRQSVFGGKNIHVATAHEDLAYS  
FGSKHPKYSDTLLDYGFYLLNVDNICQSVAIYQAALDIRQSVFGGKNIHVATAHEDLAYS  
FGSKHPKYSDTLLDYGFYLLNVDNICQSVAIYQAALDIRQSVFGGKNIHVATAHEDLAYS  
FGSKHPKYSDTLLDYGFYLLNVDNICQSVAIYQAALDIRQSVFGGKNIHVATAHEDLAYS  
FGSKHPKYSDTLLDYGFYLLNVDNICQSVAIYQAALDIRQSVFGGKNIHVATAHEDLAYS  
FGAKHPKYSDTLLDYGFYLLNVDNICQSVAIYQTALDIRQSVFGGKNIHVATAHEDLAYS  
FGHKHPKYSDTLLDYGFYLLNVDNICQSVTIYQTALDIRQSVFGGKNIHVATAHEDLAYS  
FGPPTHQKYGDALLDYGFFLLNVDSVFQSVNIYKEALAVRRGIFGNMNFHVATAHEDLSYA  
FGPPTHQKYGDALLDYGFFLLNVDSVFQSVNIYKEALAVRRGIFGNMNFHVATAHEDLSYA  
FGPPTHQKYGDALLDYGFFLLNVDSVFQSVNIYKEALAVRRGIFGNMNFHVATAHEDLSYA  
FGPPTHQKYGDALLDYGFFLLNVDSVFQSVNIYKEALAVRRGIFGNMNFHVATAHEDLSYA  
-----

-----  
KEQLLGQEDYEVALSVGHLASLYNYDMNQYENAEKLYLRSIAIGKKLFGEGYSGLEYDYR  
KEQLLGQEDYEVALSVGHLASLYNYDMNQYENAEKLYLRSIAIGKKLFGEGYSGLEYDYR  
KEQLLGQEDYEVALSVGHLASLYNYDMNQYENAEKLYLRSIAIGKKLFGEGYSGLEYDYR  
-----

01:9606|31378|NM\_006380|APPBP2|Homo\_sapiens  
03:9544|31378|NM\_001261507|APPBP2|Macaca\_mulatta  
06:10116|31378|NM\_001100969|Appbp2|Rattus\_norvegicus  
07:10090|31378|NM\_025825|Appbp2|Mus\_musculus  
08:9031|31378|NM\_001030723|APPBP2|Gallus\_gallus  
10:7955|31378|NM\_212633|appbp2|Danio\_rerio  
12:7227|31378|NM\_001272356|Pat1|Drosophila\_melanogaster  
12:7227|31378|NM\_001272357|Pat1|Drosophila\_melanogaster  
12:7227|31378|NM\_132100|Pat1|Drosophila\_melanogaster

KEQLLGQEDYEVALSVGHLASLYNYDMNQYENAEKLYLRSIAIGKKLFGEGYSGLEIDYR  
KEQLLGQEDYEVALSVGHLASLYNYDMNQYENAEKLYLRSIAIGKKLFGEGYSGLEIDYR  
KEQLLGQEDYEVALSVGHLASLYNYDMNQYENAEKLYLRSIAIGKKLFGEGYSGLEIDYR  
KEQLLGQEDYEVALSVGHLASLYNYDMNQYENAEKLYLRSIAIGKKLFGEGYSGLEIDYR  
KEQLLGQEDYEVALSVGHLASLYNYDMNQYENAEKLYLRSIAIGKKLFGEGYSGLEIDYR  
KEQLLGQEDYEVALSVGHLASLYNYDMNQYDDAERLYLRSIAIGKKLFGEGYSGLEIDYR  
KSELLGHFDYEVGLSIGHLASLYNYQMKKYRDAEQLYMRSIDISLRLFGNSYSGLEIDYL  
KSELLGHFDYEVGLSIGHLASLYNYQMKKYRDAEQLYMRSIDISLRLFGNSYSGLEIDYL  
KSELLGHFDYEVGLSIGHLASLYNYQMKKYRDAEQLYMRSIDISLRLFGNSYSGLEIDYL

00:1|Ac-MEGGGGLREEEAEAEEEGR  
01:9606|31378|0#NP\_001269405|APPBP2|Homo\_sapiens  
01:9606|31378|0#NP\_006371|APPBP2|Homo\_sapiens  
01:9606|31378|NM\_001282476|APPBP2|Homo\_sapiens  
01:9606|31378|NM\_006380|APPBP2|Homo\_sapiens  
03:9544|31378|NM\_001261507|APPBP2|Macaca\_mulatta  
06:10116|31378|NM\_001100969|Appbp2|Rattus\_norvegicus  
07:10090|31378|NM\_025825|Appbp2|Mus\_musculus  
08:9031|31378|NM\_001030723|APPBP2|Gallus\_gallus  
10:7955|31378|NM\_212633|appbp2|Danio\_rerio  
12:7227|31378|NM\_001272356|Pat1|Drosophila\_melanogaster  
12:7227|31378|NM\_001272357|Pat1|Drosophila\_melanogaster  
12:7227|31378|NM\_132100|Pat1|Drosophila\_melanogaster

-----  
GLIKLYNSIGNYEKVFHEYHNVLNWNRLRDRQYSVTDALDVTSPQSTEEVVQSFL-IS  
GLIKLYNSIGNYEKVFHEYHNVLNWNRLRDRQYSVTDALDVTSPQSTEEVVQSFL-IS  
GLIKLYNSIGNYEKVFHEYHNVLNWNRLRDRQYSVTDALDVTSPQSTEEVVQSFL-IS  
GLIKLYNSIGNYEKVFHEYHNVLNWNRLRDRQYSVTDALDVTSPQSTEEVVQSFL-IS  
GLIKLYNSTGNYEKVFHEYHNVLNWNRLRDRQYSVTDALDVTSPQSTEEVVQSFL-MS  
GLIKLYNSIGNYEKVFHEYHNVLNWNRLRDRQYSVTDALDVTSPQSTEEVVQSFL-MA  
GLIKLYNSVGNYEKVFHEYHNILANWNRLRDRQFSVTDALDVTSPQSTEEVVQSFL-MS  
GLIKLYNSVGNYEKVFHEYHNILSNWNRLRDRQFAVADALDVTTPQSTEQVVQSFL-LS  
GLCHVYETLHNFEKYLKYAHKLENWQMLRGQNLTON-SSYPAEVDYSIEEVKAKYFSMC  
GLCHVYETLHNFEKYLKYAHKLENWQMLRGQNLTONKSSYPAEVDYSIEEVKAKYFSMC  
GLCHVYETLHNFEKYLKYAHKLENWQMLRGQNLTONKSSYPAEVDYSIEEVKAKYFSMC

00:1|Ac-MEGGGGLREEEAEAEEEGR  
01:9606|31378|0#NP\_001269405|APPBP2|Homo\_sapiens  
01:9606|31378|0#NP\_006371|APPBP2|Homo\_sapiens  
01:9606|31378|NM\_001282476|APPBP2|Homo\_sapiens  
01:9606|31378|NM\_006380|APPBP2|Homo\_sapiens  
03:9544|31378|NM\_001261507|APPBP2|Macaca\_mulatta  
06:10116|31378|NM\_001100969|Appbp2|Rattus\_norvegicus  
07:10090|31378|NM\_025825|Appbp2|Mus\_musculus  
08:9031|31378|NM\_001030723|APPBP2|Gallus\_gallus  
10:7955|31378|NM\_212633|appbp2|Danio\_rerio  
12:7227|31378|NM\_001272356|Pat1|Drosophila\_melanogaster  
12:7227|31378|NM\_001272357|Pat1|Drosophila\_melanogaster  
12:7227|31378|NM\_132100|Pat1|Drosophila\_melanogaster

-----  
--QNVEGPSC-----  
--QNVEGPSC-----  
--QNVEGPSC-----  
--QNVEGPSC-----  
--QNVEGPSC-----  
--QNVEGPSC-----  
--QNVEGPSC-----  
--QNVEGPSC-----  
--QNVDGQSS-----  
--QSHGAGRLG-----  
ASKKSAHPSVHEEDTVNEN  
ASKKSAHPSVHEEDTVNEN  
ASKKSAHPSVHEEDTVNEN

***SATB2***

Ac-MDSL~~LL~~LLHGQSPSQPSFR

CLUSTAL O(1.2.1) multiple sequence alignment

|                                                     |                                                                |
|-----------------------------------------------------|----------------------------------------------------------------|
| 00:1 Ac-MDSLLLLLHGQSPSQPSFR                         | -----MDSLLLLLHGQSPSQPSFR-----                                  |
| 01:9606 32249 0#NP_001165980 SATB2 Homo_sapiens     | -----                                                          |
| 01:9606 32249 0#NP_001165988 SATB2 Homo_sapiens     | -----                                                          |
| 01:9606 32249 0#NP_056080 SATB2 Homo_sapiens        | -----                                                          |
| 01:9606 32249 NM_001172509 SATB2 Homo_sapiens       | -----RGRLEGEHCKAKHQKLSTLDSLLLLLHGQSPSQPSFRQTVSSPCAFYCDL        |
| 01:9606 32249 NM_001172517 SATB2 Homo_sapiens       | -----SGGGFAVQHGGPCAFYCDL                                       |
| 01:9606 32249 NM_015265 SATB2 Homo_sapiens          | -----SGGGFAVQHGGPCAFYCDL                                       |
| 04:9913 32249 NM_001206070 SATB2 Bos_taurus         | -----                                                          |
| 06:10116 32249 NM_001109306 Satb2 Rattus_norvegicus | ERGRGKGKGKEERERKTGTALQIIQKLSTLDSLLLLLHGQSPSQPSFRQTVSSPCAFYCDL  |
| 07:10090 32249 NM_139146 Satb2 Mus_musculus         | -----DNTTIHQKLSTLDSLLLLLHGQSPSQPSFRQTVSSPCAFYCDL               |
| 08:9031 32249 NM_001199110 SATB2 Gallus_gallus      | -----                                                          |
| 10:7955 32249 NM_001128532 satb2 Danio_rerio        | -----                                                          |
| 00:1 Ac-MDSLLLLLHGQSPSQPSFR                         | -----                                                          |
| 01:9606 32249 0#NP_001165980 SATB2 Homo_sapiens     | -----MERRSESPCLRDSPDRRSGSPDVKGPPPVKVARLEQNGSPMGARGRPNG         |
| 01:9606 32249 0#NP_001165988 SATB2 Homo_sapiens     | -----MERRSESPCLRDSPDRRSGSPDVKGPPPVKVARLEQNGSPMGARGRPNG         |
| 01:9606 32249 0#NP_056080 SATB2 Homo_sapiens        | -----MERRSESPCLRDSPDRRSGSPDVKGPPPVKVARLEQNGSPMGARGRPNG         |
| 01:9606 32249 NM_001172509 SATB2 Homo_sapiens       | PVGTLSPSRSSMERRSESPCLRDSPDRRSGSPDVKGPPPVKVARLEQNGSPMGARGRPNG   |
| 01:9606 32249 NM_001172517 SATB2 Homo_sapiens       | PVGTLSPSRSSMERRSESPCLRDSPDRRSGSPDVKGPPPVKVARLEQNGSPMGARGRPNG   |
| 01:9606 32249 NM_015265 SATB2 Homo_sapiens          | PVGTLSPSRSSMERRSESPCLRDSPDRRSGSPDVKGPPPVKVARLEQNGSPMGARGRPNG   |
| 04:9913 32249 NM_001206070 SATB2 Bos_taurus         | -----MERRSESPCLRDSPDRRSGSPDVKGPPSAKVARLEQNGSPMGARGRPNG         |
| 06:10116 32249 NM_001109306 Satb2 Rattus_norvegicus | PVGTLSPNRSSMERRSESPCLRDSPDRRSGSPDVKGPPPVKVARLEQNGSPMGARGRPNG   |
| 07:10090 32249 NM_139146 Satb2 Mus_musculus         | PVGTLSPNRSSMERRSESPCLRDSPDRRSGSPDVKGPPPVKVARLEQNGSPMGARGRPNG   |
| 08:9031 32249 NM_001199110 SATB2 Gallus_gallus      | -----MERRSESPCLRDSPDRSGSPDVKGPPPGKVARLEQNGSPMGTRGRPNG          |
| 10:7955 32249 NM_001128532 satb2 Danio_rerio        | -----MERGGGESPLRLDSPERRGSSSPDIGCPPQKLGRLELNGSPTGHRSRHNG        |
| 00:1 Ac-MDSLLLLLHGQSPSQPSFR                         | -----                                                          |
| 01:9606 32249 0#NP_001165980 SATB2 Homo_sapiens     | AVAKAVGGLMIPVFCVVEQLDGSLEYD--NREEHAEFVLVRKDVLFSQLVETALLALGYS   |
| 01:9606 32249 0#NP_001165988 SATB2 Homo_sapiens     | AVAKAVGGLMIPVFCVVEQLDGSLEYD--NREEHAEFVLVRKDVLFSQLVETALLALGYS   |
| 01:9606 32249 0#NP_056080 SATB2 Homo_sapiens        | AVAKAVGGLMIPVFCVVEQLDGSLEYD--NREEHAEFVLVRKDVLFSQLVETALLALGYS   |
| 01:9606 32249 NM_001172509 SATB2 Homo_sapiens       | AVAKAVGGLMIPVFCVVEQLDGSLEYD--NREEHAEFVLVRKDVLFSQLVETALLALGYS   |
| 01:9606 32249 NM_001172517 SATB2 Homo_sapiens       | AVAKAVGGLMIPVFCVVEQLDGSLEYD--NREEHAEFVLVRKDVLFSQLVETALLALGYS   |
| 01:9606 32249 NM_015265 SATB2 Homo_sapiens          | AVAKAVGGLMIPVFCVVEQLDGSLEYD--NREEHAEFVLVRKDVLFSQLVETALLALGYS   |
| 04:9913 32249 NM_001206070 SATB2 Bos_taurus         | AVAKAVGGLMIPVFCVVEQLDGSLEYD--NREEHAEFVLVRKDVLFSQLVETALLALGYS   |
| 06:10116 32249 NM_001109306 Satb2 Rattus_norvegicus | AVAKAVGGLMIPVFCVVEQLDGSLEYD--NREEHAEFVLVRKDVLFSQLVETALLALGYS   |
| 07:10090 32249 NM_139146 Satb2 Mus_musculus         | AVAKAVGGLMIPVFCVVEQLDGSLEYD--NREEHAEFVLVRKDVLFSQLVETALLALGYS   |
| 08:9031 32249 NM_001199110 SATB2 Gallus_gallus      | AVAKAVGGLMIPVFCVVEQLDGSLEYD--NREEHAEFVLVRKDVLFSQLVETALLALGYS   |
| 10:7955 32249 NM_001128532 satb2 Danio_rerio        | AVAKAVGGLMIPVFCVVEQMDGGMISDGESREEHAEFVLVRKDIILFTQLVETALLALGYS  |
| 00:1 Ac-MDSLLLLLHGQSPSQPSFR                         | -----                                                          |
| 01:9606 32249 0#NP_001165980 SATB2 Homo_sapiens     | HSSAAQAQGI IKLGRWNPLPLSYVTDAPDATVADMLQDVYHVVTLKIQLQSCSKLEDLPA  |
| 01:9606 32249 0#NP_001165988 SATB2 Homo_sapiens     | HSSAAQAQGI IKLGRWNPLPLSYVTDAPDATVADMLQDVYHVVTLKIQLQSCSKLEDLPA  |
| 01:9606 32249 0#NP_056080 SATB2 Homo_sapiens        | HSSAAQAQGI IKLGRWNPLPLSYVTDAPDATVADMLQDVYHVVTLKIQLQSCSKLEDLPA  |
| 01:9606 32249 NM_001172509 SATB2 Homo_sapiens       | HSSAAQAQGI IKLGRWNPLPLSYVTDAPDATVADMLQDVYHVVTLKIQLQSCSKLEDLPA  |
| 01:9606 32249 NM_001172517 SATB2 Homo_sapiens       | HSSAAQAQGI IKLGRWNPLPLSYVTDAPDATVADMLQDVYHVVTLKIQLQSCSKLEDLPA  |
| 01:9606 32249 NM_015265 SATB2 Homo_sapiens          | HSSAAQAQGI IKLGRWNPLPLSYVTDAPDATVADMLQDVYHVVTLKIQLQSCSKLEDLPA  |
| 04:9913 32249 NM_001206070 SATB2 Bos_taurus         | HSSAAQAQGI IKLGRWNPLPLSYVTDAPDATVADMLQDVYHVVTLKIQLQSCSKLEDLPA  |
| 06:10116 32249 NM_001109306 Satb2 Rattus_norvegicus | HSSAAQAQGI IKLGRWNPLPLSYVTDAPDATVADMLQDVYHVVTLKIQLQSCSKLEDLPA  |
| 07:10090 32249 NM_139146 Satb2 Mus_musculus         | HSSAAQAQGI IKLGRWNPLPLSYVTDAPDATVADMLQDVYHVVTLKIQLQSCSKLEDLPA  |
| 08:9031 32249 NM_001199110 SATB2 Gallus_gallus      | HSSAAQAQGI IKLGRWNPLPLSYVTDAPDATVADMLQDVYHVVTLKIQLQSCSKLEDLPA  |
| 10:7955 32249 NM_001128532 satb2 Danio_rerio        | HSSAAQAQGI IKVGRWNPLPIHYLTDAPDATVADMLLDVYHVMVTLRIQLQSFALLEDLPS |
| 00:1 Ac-MDSLLLLLHGQSPSQPSFR                         | -----                                                          |
| 01:9606 32249 0#NP_001165980 SATB2 Homo_sapiens     | EQWNHATVRNALKELLKEMNQSTLAKECPLSQSMISSIVNSTYYANVSATKCQEFGRWYK   |
| 01:9606 32249 0#NP_001165988 SATB2 Homo_sapiens     | EQWNHATVRNALKELLKEMNQSTLAKECPLSQSMISSIVNSTYYANVSATKCQEFGRWYK   |
| 01:9606 32249 0#NP_056080 SATB2 Homo_sapiens        | EQWNHATVRNALKELLKEMNQSTLAKECPLSQSMISSIVNSTYYANVSATKCQEFGRWYK   |
| 01:9606 32249 NM_001172509 SATB2 Homo_sapiens       | EQWNHATVRNALKELLKEMNQSTLAKECPLSQSMISSIVNSTYYANVSATKCQEFGRWYK   |
| 01:9606 32249 NM_001172517 SATB2 Homo_sapiens       | EQWNHATVRNALKELLKEMNQSTLAKECPLSQSMISSIVNSTYYANVSATKCQEFGRWYK   |
| 01:9606 32249 NM_015265 SATB2 Homo_sapiens          | EQWNHATVRNALKELLKEMNQSTLAKECPLSQSMISSIVNSTYYANVSATKCQEFGRWYK   |
| 04:9913 32249 NM_001206070 SATB2 Bos_taurus         | EQWNHATVRNALKELLKEMNQSTLAKECPLSQSMISSIVNSTYYANVSATKCQEFGRWYK   |
| 06:10116 32249 NM_001109306 Satb2 Rattus_norvegicus | EQWNHATVRNALKELLKEMNQSTLAKECPLSQSMISSIVNSTYYANVSATKCQEFGRWYK   |
| 07:10090 32249 NM_139146 Satb2 Mus_musculus         | EQWNHATVRNALKELLKEMNQSTLAKECPLSQSMISSIVNSTYYANVSATKCQEFGRWYK   |
| 08:9031 32249 NM_001199110 SATB2 Gallus_gallus      | EQWNHATVRNALKELLKEMNQSTLAKECPLSQSMISSIVNSTYYANVSATKCQEFGRWYK   |
| 10:7955 32249 NM_001128532 satb2 Danio_rerio        | EQWNHATVRNALKELLKEMNQSTLAKECPLSQSMISSIVNSSYYANVSTAKCQEFGRWYK   |
| 00:1 Ac-MDSLLLLLHGQSPSQPSFR                         | -----                                                          |
| 01:9606 32249 0#NP_001165980 SATB2 Homo_sapiens     | KYKKIKVE-----RVERENLSDYCVLGQRPM-HLPNMQNLASLG-----              |
| 01:9606 32249 0#NP_001165988 SATB2 Homo_sapiens     | KYKKIKVE-----RVERENLSDYCVLGQRPM-HLPNMQNLASLG-----              |
| 01:9606 32249 0#NP_056080 SATB2 Homo_sapiens        | KYKKIKVE-----RVERENLSDYCVLGQRPM-HLPNMQNLASLG-----              |
| 01:9606 32249 NM_001172509 SATB2 Homo_sapiens       | KYKKIKVE-----RVERENLSDYCVLGQRPM-HLPNMQNLASLG-----              |
| 01:9606 32249 NM_001172517 SATB2 Homo_sapiens       | KYKKIKVE-----RVERENLSDYCVLGQRPM-HLPNMQNLASLG-----              |
| 01:9606 32249 NM_015265 SATB2 Homo_sapiens          | KYKKIKVE-----RVERENLSDYCVLGQRPM-HLPNMQNLASLG-----              |
| 04:9913 32249 NM_001206070 SATB2 Bos_taurus         | KYKKIKVE-----RVERENLSDYCVLGQRPM-HLPNMQNLASLG-----              |
| 06:10116 32249 NM_001109306 Satb2 Rattus_norvegicus | KYKKIKVE-----RVERENLSDYCVLGQRPM-HLPNMQNLASLG-----              |
| 07:10090 32249 NM_139146 Satb2 Mus_musculus         | KYKKIKVE-----RVERENLSDYCVLGQRPM-HLPNMQNLASLG-----              |
| 08:9031 32249 NM_001199110 SATB2 Gallus_gallus      | KYKKIKVE-----RVERENLSDYCVLGQRPM-HLPNINQLATLG-----              |
| 10:7955 32249 NM_001128532 satb2 Danio_rerio        | KYKKIKGDYLVQGREGSEIKVERDNIADFCVLAQRPPHLTALGQLGPLNSAGSLVKGNS    |



|          |       |                |       |                   |                                                  |             |
|----------|-------|----------------|-------|-------------------|--------------------------------------------------|-------------|
| 01:9606  | 32249 | 0#NP_001165980 | SATB2 | Homo_sapiens      | EEAPPPPPPT-----EDSCAKKPRSRTKISLEALGILQSF         | IHDVGLYPDQE |
| 01:9606  | 32249 | 0#NP_001165988 | SATB2 | Homo_sapiens      | EEAPPPPPPT-----EDSCAKKPRSRTKISLEALGILQSF         | IHDVGLYPDQE |
| 01:9606  | 32249 | 0#NP_056080    | SATB2 | Homo_sapiens      | EEAPPPPPPT-----EDSCAKKPRSRTKISLEALGILQSF         | IHDVGLYPDQE |
| 01:9606  | 32249 | NM_001172509   | SATB2 | Homo_sapiens      | EEAPPPPPPT-----EDSCAKKPRSRTKISLEALGILQSF         | IHDVGLYPDQE |
| 01:9606  | 32249 | NM_001172517   | SATB2 | Homo_sapiens      | EEAPPPPPPT-----EDSCAKKPRSRTKISLEALGILQSF         | IHDVGLYPDQE |
| 01:9606  | 32249 | NM_015265      | SATB2 | Homo_sapiens      | EEAPPPPPPT-----EDSCAKKPRSRTKISLEALGILQSF         | IHDVGLYPDQE |
| 04:9913  | 32249 | NM_001206070   | SATB2 | Bos_taurus        | EEAPPPPPPT-----EDSCAKKPRSRTKISLEALGILQSF         | IHDVGLYPDQE |
| 06:10116 | 32249 | NM_001109306   | Satb2 | Rattus_norvegicus | EEAPPPPPPT-----EDSCAKKPRSRTKISLEALGILQSF         | IHDVGLYPDQE |
| 07:10090 | 32249 | NM_139146      | Satb2 | Mus_musculus      | EEAPPPPPPT-----EDSCAKKPRSRTKISLEALGILQSF         | IHDVGLYPDQE |
| 08:9031  | 32249 | NM_001199110   | SATB2 | Gallus_gallus     | EEAPP--PPA-----EDSCAKKPRSRTKISLEALGILQSF         | IHDVGLYPDQE |
| 10:7955  | 32249 | NM_001128532   | satb2 | Danio_rerio       | EDPIPSSGAENPQANTGSGNNGPVVSVTKKPRSRTKISLEALGILQSF | IQDVGLYPDQE |

|          |         |                 |       |                   |                       |                                        |
|----------|---------|-----------------|-------|-------------------|-----------------------|----------------------------------------|
| 00:1     | Ac-MDSL | LLHLHGQSPSQPSFR |       |                   | -----                 |                                        |
| 01:9606  | 32249   | 0#NP_001165980  | SATB2 | Homo_sapiens      | AIHTLSAQLDLPKHTIIKFFQ | NQRYHVKHHGKLKEH--LGS                   |
| 01:9606  | 32249   | 0#NP_001165988  | SATB2 | Homo_sapiens      | AIHTLSAQLDLPKHTIIKFFQ | NQRYHVKHHGKLKEH--LGS                   |
| 01:9606  | 32249   | 0#NP_056080     | SATB2 | Homo_sapiens      | AIHTLSAQLDLPKHTIIKFFQ | NQRYHVKHHGKLKEH--LGS                   |
| 01:9606  | 32249   | NM_001172509    | SATB2 | Homo_sapiens      | AIHTLSAQLDLPKHTIIKFFQ | NQRYHVKHHGKLKEH--LGS                   |
| 01:9606  | 32249   | NM_001172517    | SATB2 | Homo_sapiens      | AIHTLSAQLDLPKHTIIKFFQ | NQRYHVKHHGKLKEH--LGS                   |
| 01:9606  | 32249   | NM_015265       | SATB2 | Homo_sapiens      | AIHTLSAQLDLPKHTIIKFFQ | NQRYHVKHHGKLKEH--LGS                   |
| 04:9913  | 32249   | NM_001206070    | SATB2 | Bos_taurus        | AIHTLSAQLDLPKHTIIKFFQ | NQRYHVKHHGKLKEH--LGS                   |
| 06:10116 | 32249   | NM_001109306    | Satb2 | Rattus_norvegicus | AIHTLSAQLDLPKHTIIKFFQ | NQRYHVKHHGKLKEH--LGS                   |
| 07:10090 | 32249   | NM_139146       | Satb2 | Mus_musculus      | AIHTLSAQLDLPKHTIIKFFQ | NQRYHVKHHGKLKEH--LGS                   |
| 08:9031  | 32249   | NM_001199110    | SATB2 | Gallus_gallus     | AIHTLSAQLDLPKHTIIKFFQ | NQRYHVKHHGKLKEH--LGT                   |
| 10:7955  | 32249   | NM_001128532    | satb2 | Danio_rerio       | AIHTLSAQLDLPKHTIVKFFQ | NQRYHVKHHGRLKELGSEGGGVDVAEYRDELLSSSEDA |

|          |         |                 |       |                   |                                                               |       |
|----------|---------|-----------------|-------|-------------------|---------------------------------------------------------------|-------|
| 00:1     | Ac-MDSL | LLHLHGQSPSQPSFR |       |                   | -----                                                         |       |
| 01:9606  | 32249   | 0#NP_001165980  | SATB2 | Homo_sapiens      | DS-EEGSEEMYKVEAEEENADKSKAAPAE-IDQR                            | ----- |
| 01:9606  | 32249   | 0#NP_001165988  | SATB2 | Homo_sapiens      | DS-EEGSEEMYKVEAEEENADKSKAAPAE-IDQR                            | ----- |
| 01:9606  | 32249   | 0#NP_056080     | SATB2 | Homo_sapiens      | DS-EEGSEEMYKVEAEEENADKSKAAPAE-IDQR                            | ----- |
| 01:9606  | 32249   | NM_001172509    | SATB2 | Homo_sapiens      | DS-EEGSEEMYKVEAEEENADKSKAAPAE-IDQR                            | ----- |
| 01:9606  | 32249   | NM_001172517    | SATB2 | Homo_sapiens      | DS-EEGSEEMYKVEAEEENADKSKAAPAE-IDQR                            | ----- |
| 01:9606  | 32249   | NM_015265       | SATB2 | Homo_sapiens      | DS-EEGSEEMYKVEAEEENADKSKAAPAE-IDQR                            | ----- |
| 04:9913  | 32249   | NM_001206070    | SATB2 | Bos_taurus        | DS-EEGSEEMYKVEAEEENADKSKAAPAE-IDQR                            | ----- |
| 06:10116 | 32249   | NM_001109306    | Satb2 | Rattus_norvegicus | DS-EEGSEEMYKVEAEEENADKSKAAPAE-IDQR                            | ----- |
| 07:10090 | 32249   | NM_139146       | Satb2 | Mus_musculus      | DS-EEGSEEMYKVEAEEENADKSKAAPAE-IDQR                            | ----- |
| 08:9031  | 32249   | NM_001199110    | SATB2 | Gallus_gallus     | DS-EEGSEEMYKVEAEEENADKSKAAPAE-IDQR                            | ----- |
| 10:7955  | 32249   | NM_001128532    | satb2 | Danio_rerio       | ESSEDGHEEIIYSGHESAPAGAANSVSTPALSSVQDENKDKCLPLGTVRPNSLPPCSSSSS |       |

|          |         |                 |       |                   |           |  |
|----------|---------|-----------------|-------|-------------------|-----------|--|
| 00:1     | Ac-MDSL | LLHLHGQSPSQPSFR |       |                   | -----     |  |
| 01:9606  | 32249   | 0#NP_001165980  | SATB2 | Homo_sapiens      | -----     |  |
| 01:9606  | 32249   | 0#NP_001165988  | SATB2 | Homo_sapiens      | -----     |  |
| 01:9606  | 32249   | 0#NP_056080     | SATB2 | Homo_sapiens      | -----     |  |
| 01:9606  | 32249   | NM_001172509    | SATB2 | Homo_sapiens      | -----     |  |
| 01:9606  | 32249   | NM_001172517    | SATB2 | Homo_sapiens      | -----     |  |
| 01:9606  | 32249   | NM_015265       | SATB2 | Homo_sapiens      | -----     |  |
| 04:9913  | 32249   | NM_001206070    | SATB2 | Bos_taurus        | -----     |  |
| 06:10116 | 32249   | NM_001109306    | Satb2 | Rattus_norvegicus | -----     |  |
| 07:10090 | 32249   | NM_139146       | Satb2 | Mus_musculus      | -----     |  |
| 08:9031  | 32249   | NM_001199110    | SATB2 | Gallus_gallus     | -----     |  |
| 10:7955  | 32249   | NM_001128532    | satb2 | Danio_rerio       | PRDQADYQR |  |

*HDGF*

Ac-AAPELGPGATIEAGAAR

```

00:1|Ac-AAPELPGPATIEAGAAAR-----AA
01:9606|3306|0#NP_001119522|HDGF|Homo_sapiens-----
01:9606|3306|0#NP_001119523|HDGF|Homo_sapiens-----
01:9606|3306|0#NP_004485|HDGF|Homo_sapiens-----
01:9606|3306|NM_001126050|HDGF|Homo_sapiens-----LAVESKS
01:9606|3306|NM_001126051|HDGF|Homo_sapiens-----
01:9606|3306|NM_004494|HDGF|Homo_sapiens-----
04:9913|3306|NM_175832|HDGF|Bos_taurus-----NSNNTSA---HPSYRSVADPRPPRPGCARAES
06:10116|3306|NM_053707|Hdgf|Rattus_norvegicus-----GLALRR-EQLNFKHKQP--EHSPSRALP-TAPARSERHAGADAVAA
07:10090|3306|NM_008231|Hdgf|Mus_musculus-----EWAAGGGGSLARAEEGAIEFQTQTTTRASAPGAVCCP-PPALSERRAGADAVAA
09:8364|3306|NM_001017007|hdgf|Xenopus_tropicalis-----

```

|          |                                           |                            |                                               |
|----------|-------------------------------------------|----------------------------|-----------------------------------------------|
| 00:1     | Ac-AAPELPGGATIEAGAAR                      | P--ELGPGATIEAGAAR-----     |                                               |
| 01:9606  | 3306 0#NP_001119522 HDGF Homo_sapiens     | -----MHPEGG-----           | QFVPQLLGHLLATKLKRFLLSKG                       |
| 01:9606  | 3306 0#NP_001119523 HDGF Homo_sapiens     | -----                      | MEQRAG                                        |
| 01:9606  | 3306 0#NP_004485 HDGF Homo_sapiens        | -----                      |                                               |
| 01:9606  | 3306 NM_001126050 HDGF Homo_sapiens       | PWQDSSLE-----              | KRDRMHPEGG-----QFVPQLLGHLLATKLKRFLLSKG        |
| 01:9606  | 3306 NM_001126051 HDGF Homo_sapiens       | -YGHKEV-----               | QRGPQCAERHGAHSSRPRLRARCQEPRVPSKYL---WIEMEQRAG |
| 01:9606  | 3306 NM_004494 HDGF Homo_sapiens          | P--ELGPGATIEAGAARGPERSGA-- | ATAARANL-----GSRFPARRG                        |
| 04:9913  | 3306 NM_175832 HDGF Bos_taurus            | PWQRSSPGRGHHRG--           | GRARAGAERRRYRTRKL-----GLALSGPAR               |
| 06:10116 | 3306 NM_053707 Hdgf Rattus_norvegicus     | P--ELASGASIEAGAARGPERSGA-- | ATAARANL-----GSRFPARRG                        |
| 07:10090 | 3306 NM_008231 Hdgf Mus_musculus          | P--ELASGASIEAGAARGPERSGA-- | ATAARANL-----GSRFPARRG                        |
| 09:8364  | 3306 NM_001017007 hdgf Xenopus_tropicalis | -----PS--                  | VQAVCLPLSRRLSRSP-----VTRPREEEEEK              |

|          |        |                                     |  |  |  |           |                                                                                  |
|----------|--------|-------------------------------------|--|--|--|-----------|----------------------------------------------------------------------------------|
|          | 00:1   | Ac-AAPELPGPATIEAGAAR                |  |  |  | - - - - - | GRRAQIP- - - - -DVSRA TPHTIDEMPEAAVKSTANKYQVFFFGT                                |
| 01:9606  | [3306] | 0#NP_001119522 HDGF Homo_sapiens    |  |  |  | - - - - - | TLCNCGAVIDEMPEAAVKSTANKYQVFFFGT                                                  |
| 01:9606  | [3306] | 0#NP_001119523 HDGF Homo_sapiens    |  |  |  | - - - - - | MRSRNRQKEYKCGDLVF AKMKGYPHWP ARIDEMPEAAVKSTANKYQVFFFGT                           |
| 01:9606  | [3306] | NM_001126050 HDGF Homo_sapiens      |  |  |  | - - - - - | DVSRA TPHTIDEMPEAAVKSTANKYQVFFFGT                                                |
| 01:9606  | [3306] | NM_001126051 HDGF Homo_sapiens      |  |  |  | - - - - - | TLCNCGAVIDEMPEAAVKSTANKYQVFFFGT                                                  |
| 01:9606  | [3306] | NM_004494 HDGF Homo_sapiens         |  |  |  | - - - - - | ARGARSPAMSRSNRQKEYKCGDL VF AKMKGY PHWPAR IDEMPEAA VKSTANK YQVFF FG T             |
| 04:9913  | [3306] | NM_175832 HDGF Bos_taurus           |  |  |  | - - - - - | SRGARSPAMSRSNRQKEYKCGDL VF AKMKGY PHWPAR IDEMPEAA VKSTANK YQVFF FG T             |
| 06:10116 | [3306] | NM_053707 hdgf Rattus_norvegicus    |  |  |  | - - - - - | ARGAGPAMSRSNRQKEYKCGDL VF AKMKGY PHWPAR IDEMPEAA VKSTANK YQVFF FG T              |
| 07:10090 | [3306] | NM_008231 hdgf Mus_musculus         |  |  |  | - - - - - | LLCP SVSAMS RSNR QREY K CG DL VFA KM KGYP HW PAR DEV PE PNA KS S ANKY QV FF FG T |
| 09:8364  | [3306] | NM_01017007 hdgf Xenopus_tropicalis |  |  |  | - - - - - |                                                                                  |

```
00:1|Ac-AAPELGPATIEAGAAR|-----
01:9606|3306|0#NP_001119522|HDGF|Homo_sapiens|HETAFLGPKDLFPYEESEKFKGPKNKRKGFSEGLWEIENNPTVKASGYQSSQKKSCVEEP
01:9606|3306|0#NP_001119523|HDGF|Homo_sapiens|HETAFLGPKDLFPYEESEKFKGPKNKRKGFSEGLWEIENNPTVKASGYQSSQKKSCVEEP
01:9606|3306|0#NP_004485|HDGF|Homo_sapiens|HETAFLGPKDLFPYEESEKFKGPKNKRKGFSEGLWEIENNPTVKASGYQSSQKKSCVEEP
01:9606|3306|NM_001126050|HDGF|Homo_sapiens|HETAFLGPKDLFPYEESEKFKGPKNKRKGFSEGLWEIENNPTVKASGYQSSQKKSCVEEP
01:9606|3306|NM_001126051|HDGF|Homo_sapiens|HETAFLGPKDLFPYEESEKFKGPKNKRKGFSEGLWEIENNPTVKASGYQSSQKKSCVEEP
01:9606|3306|NM_004494|HDGF|Homo_sapiens|HETAFLGPKDLFPYEESEKFKGPKNKRKGFSEGLWEIENNPTVKASGYQSSQKKSCVEEP
04:9913|3306|NM_175832|HDGF|Bos_taurus|HETAFLGPKDLFPYEESEKFKGPKNKRKGFSEGLWEIENNPTVKASGYQSSQKKSCVEEP
06:10116|3306|NM_053707|Hdgf|Rattus_norvegicus|HETAFLGPKDLFPYEESEKFKGPKNKRKGFSEGLWEIENNPTVKASGYQSSQKKSCAAEP
07:10090|3306|NM_008231|Hdgf|Mus_musculus|HETAFLGPKDLFPYEESEKFKGPKNKRKGFSEGLWEIENNPTVKASGYQSSQKKSCAAEP
09:8364|3306|NM_01017007|hdgf|Xenopus_tropicalis|HETAYLGSKDIFPYYEETKEKYGKTNKRKGFSEGLWEIENNPTVKSSGHQPSRKRSSTTKA
```

|          |                                          |                                                           |                                     |
|----------|------------------------------------------|-----------------------------------------------------------|-------------------------------------|
| 00:1     | Ac-AAPELPGPATIEAGAAR                     |                                                           | - - - - -                           |
| 01:9606  | 3306 0#NP_001119522 HDGF Homo_sapiens    | E- - - - -                                                | - PEPEAAEGDGDKKGNAEGSSDEEGLVIDEPAKE |
| 01:9606  | 3306 0#NP_001119523 HDGF Homo_sapiens    | E- - - - -                                                | - PEPEAAEGDGDKKGNAEGSSDEEGLVIDEPAKE |
| 01:9606  | 3306 0#NP_004485 HDGF Homo_sapiens       | E- - - - -                                                | - PEPEAAEGDGDKKGNAEGSSDEEGLVIDEPAKE |
| 01:9606  | 3306 NM_001126050 HDGF Homo_sapiens      | E- - - - -                                                | - PEPEAAEGDGDKKGNAEGSSDEEGLVIDEPAKE |
| 01:9606  | 3306 NM_001126051 HDGF Homo_sapiens      | E- - - - -                                                | - PEPEAAEGDGDKKGNAEGSSDEEGLVIDEPAKE |
| 01:9606  | 3306 NM_004494 HDGF Homo_sapiens         | E- - - - -                                                | - PEPEAAEGDGDKKGNAEGSSDEEGLVIDEPAKE |
| 04:9913  | 3306 NM_175832 HDGF Bos_taurus           | E- - - - -                                                | - PEPEATGEDGDKKGNAEGSSDEEGLVIDEPTKE |
| 06:10116 | 3306 NM_053707 hdgf Rattus_norvegicus    | E- - - - -                                                | - VEPEAHGEgdgdkknaegssdeeglvidEPAKE |
| 07:10090 | 3306 NM_008231 hdgf Mus_musculus         | E- - - - -                                                | - VEPEAHEGdgdkkgsaegssdeeglvidEPAKE |
| 09:8364  | 3306 NM_01017007 hdgf Xenopus_tropicalis | GRGGGAknsgkaarknleEdEDADADAeEKeeAdSEkkNAEGSSDEEGLVIdEQSkE |                                     |

```
00:1|Ac-AAPELPGPATIEAGAAR-----  
01:9606|3306|0#NP_001119522|HDGF|Homo_sapiensKNEKGALKRRAGDILLEDSPKRPKAEENPEGEEKEAATLEVE-RP--LPMEVEKNSTPSEP  
01:9606|3306|0#NP_001119523|HDGF|Homo_sapiensKNEKGALKRRAGDILLEDSPKRPKAEENPEGEEKEAATLEVE-RP--LPMEVEKNSTPSEP  
01:9606|3306|0#NP_004485|HDGF|Homo_sapiensKNEKGALKRRAGDILLEDSPKRPKAEENPEGEEKEAATLEVE-RP--LPMEVEKNSTPSEP  
01:9606|3306|NM_001126050|HDGF|Homo_sapiensKNEKGALKRRAGDILLEDSPKRPKAEENPEGEEKEAATLEVE-RP--LPMEVEKNSTPSEP  
01:9606|3306|NM_001126051|HDGF|Homo_sapiensKNEKGALKRRAGDILLEDSPKRPKAEENPEGEEKEAATLEVE-RP--LPMEVEKNSTPSEP  
01:9606|3306|NM_004494|HDGF|Homo_sapiensKNEKGALKRRAGDILLEDSPKRPKAEENPEGEEKEAATLEVE-RP--LPMEVEKNSTPSEP  
04:9913|3306|NM_175832|HDGF|Bos_taurusKNEKGALKRRAGDILLEDSPKRPKAEADLEGEEKEGATLEGE-RP--LPVAAEKNSTPSEP  
06:10116|3306|NM_053707|hdgf|Rattus_norvegicusKNEKGMLKKRAGDMLEDSPKRPKESGDHEEDEEKIAALEGE-RP--LPVMEEKNSTPSEP  
07:10090|3306|NM_008231|hdgf|Mus_musculusKNEKGTLKKRAGDVLEDSPKRPKESGDHEEDDEIKIAALEGE-RP--LPMEVEKNSTPSEP  
09:8364|3306|NM_001017007|hdgf|Xenopus_tropicalisKSPTANKRK AEDTAESSPPKA KVBDDKEPKENEKEESE NEEERVTPEAGEKKNRP KP
```

|         |                      |                |      |              |                                     |
|---------|----------------------|----------------|------|--------------|-------------------------------------|
| 00:1    | Ac-AAPELGPATIEAGAAAR |                |      |              |                                     |
| 01:9606 | 3306                 | 0#NP_001119522 | HDGF | Homo_sapiens | GSGRGGPPQEEEEEEEEEEATKDAEAPGIRDHESL |
| 01:9606 | 3306                 | 0#NP_001119523 | HDGF | Homo_sapiens | GSGRGGPPQEEEEEEEEEEATKDAEAPGIRDHESL |
| 01:9606 | 3306                 | 0#NP_004485    | HDGF | Homo_sapiens | GSGRGGPPQEEEEEEEEEEATKDAEAPGIRDHESL |
| 01:9606 | 3306                 | NM_001126050   | HDGF | Homo_sapiens | GSGRGGPPQEEEEEEEEEEATKDAEAPGIRDHESL |

|          |  |      |  |              |  |      |  |                    |                                      |
|----------|--|------|--|--------------|--|------|--|--------------------|--------------------------------------|
| 01:9606  |  | 3306 |  | NM_001126051 |  | HDGF |  | Homo_sapiens       | GSGRGPPQEEEEEEDEEEATKEDAEAPGIRDHESL  |
| 01:9606  |  | 3306 |  | NM_004494    |  | HDGF |  | Homo_sapiens       | GSGRGPPQEEEEEEDEEEATKEDAEAPGIRDHESL  |
| 04:9913  |  | 3306 |  | NM_175832    |  | HDGF |  | Bos_taurus         | GSGRGPPQEEEEEE-EEEEAAKEDAEAPGLRDHESL |
| 06:10116 |  | 3306 |  | NM_053707    |  | Hdgf |  | Rattus_norvegicus  | DSGQGGPPPEEEEE---GEEAAKEEAQGVVDHESL  |
| 07:10090 |  | 3306 |  | NM_008231    |  | Hdgf |  | Mus_musculus       | DSGQGGPPPEEEEE---GEEAAKEEAQGVVDHESL  |
| 09:8364  |  | 3306 |  | NM_001017007 |  | hdgf |  | Xenopus_tropicalis | AEDSGKEKVEEKPVGEE--TKE-----QKESL     |

***RNF31***

Ac-AGGEAGADSCLR

CLUSTAL O(1.2.1) multiple sequence alignment

|                                                     |                                                                    |
|-----------------------------------------------------|--------------------------------------------------------------------|
| 00:1 Ac-AGGEAGADSCLR                                | -----AGGEAGADSCLR-----                                             |
| 01:9606 33228 NM_001310332 RNF31 Homo_sapiens       |                                                                    |
| 01:9606 33228 NM_017999 RNF31 Homo_sapiens          | VTWGGCVGRGGPQSRAPDGRGGARAARCPRRVLAGEAGADSCLRMPGEEEEERAFVLVARE      |
| 06:10116 33228 NM_001108868 Rnf31 Rattus_norvegicus | -----RGGLSD-----PGLLWRCALHRPPLEDSEAEFVSGLRMPGDE-ERAFLAARE          |
| 07:10090 33228 NM_194346 Rnf31 Mus_musculus         | -----PGLLWRRALHRQPLEGREAEFVSRLRMPGDE-ERGFALAARE                    |
| 09:8364 33228 NM_001097175 rnf31 Xenopus_tropicalis | -----                                                              |
| 00:1 Ac-AGGEAGADSCLR                                | -----                                                              |
| 01:9606 33228 NM_001310332 RNF31 Homo_sapiens       |                                                                    |
| 01:9606 33228 NM_017999 RNF31 Homo_sapiens          | ELASALRRDSGQAFSLEQLRPLLASSLPLAARYLQLDAARLVRCNAHGEP RNYLNTLST-      |
| 06:10116 33228 NM_001108868 Rnf31 Rattus_norvegicus | ELASALRWDSAQVFPLEQLTPLLATSLPLSSRYRQLDAGRLVRCNAHGEP RNYLNTLST-      |
| 07:10090 33228 NM_194346 Rnf31 Mus_musculus         | ELASALRWDSAQVFPLEQLMPLLATSLPPAARYLQLDAGRLVRCNAHGEP RNYLNTLST-      |
| 09:8364 33228 NM_001097175 rnf31 Xenopus_tropicalis | -----IQVW-----NLSRMLG-TWGFPEME-----EHP IRSALENALINQ                |
| 00:1 Ac-AGGEAGADSCLR                                | -----                                                              |
| 01:9606 33228 NM_001310332 RNF31 Homo_sapiens       |                                                                    |
| 01:9606 33228 NM_017999 RNF31 Homo_sapiens          |                                                                    |
| 06:10116 33228 NM_001108868 Rnf31 Rattus_norvegicus | -ALNILEKYGRNLLSPQRPRYW RGVKFNNPVFRSTVDVAVQGGRDVLRLYGYTEEPDGLS      |
| 07:10090 33228 NM_194346 Rnf31 Mus_musculus         | -ALNILEKYGRNLLSPQRPRYW RSVKFNNPVFRSTVDVAVQGGRDVLRLYGYTEERPDGLS     |
| 09:8364 33228 NM_001097175 rnf31 Xenopus_tropicalis | PGAVTPEFLNKMLYLPLRERYRL-----SVEDLLKGGTQGGRFVLSLYGYSQSLPDGLS        |
| 00:1 Ac-AGGEAGADSCLR                                | -----                                                              |
| 01:9606 33228 NM_001310332 RNF31 Homo_sapiens       |                                                                    |
| 01:9606 33228 NM_017999 RNF31 Homo_sapiens          | -----DAPLVLMDLCTRAGEPSLTQNTHP RQQALEQLLEDKVEDDMLQLSEFD             |
| 06:10116 33228 NM_001108868 Rnf31 Rattus_norvegicus | FPEGQEEPDEHQVATVTLEVLLLRTELSLLLQNTHP RQQALEQLLEDKVEDDMLQLSEFD      |
| 07:10090 33228 NM_194346 Rnf31 Mus_musculus         | FPGGQEEPDEYQVAIVTLEVLLLRTELNLLLQNTHP RQNALDQLLRDSVEDDMLQLSEFH      |
| 09:8364 33228 NM_001097175 rnf31 Xenopus_tropicalis | FPEGQEEPDEYQVAVVTLEVLLLRTELSLLLQNTHP RQNALDQLLRSEVEDGMLQLSEFH      |
|                                                     | FPDSVQEPDVSTVAAVTADV IILHHELNLLISNMHPRHEEAAQELLGGELF---QQ---       |
| 00:1 Ac-AGGEAGADSCLR                                | -----                                                              |
| 01:9606 33228 NM_001310332 RNF31 Homo_sapiens       |                                                                    |
| 01:9606 33228 NM_017999 RNF31 Homo_sapiens          |                                                                    |
| 06:10116 33228 NM_001108868 Rnf31 Rattus_norvegicus | PLLREIAPGPLTTPSVPGSTPGPCFLCGSAPGTLHCP SCKQALCPACDHLFHGHPSRAHH      |
| 07:10090 33228 NM_194346 Rnf31 Mus_musculus         | PLLREIAPGPLTTPSVPGSTPGPCFLCGSAPGTLHCP SCKQALCPACDHLFHGHPSRAHH      |
| 09:8364 33228 NM_001097175 rnf31 Xenopus_tropicalis | PLLREIVPGPL--PSAPGHTPGPCFLCGSAPGTLHCPACNQASCPACDLLFHGHPSRAHH       |
|                                                     | EPWAVFCAVCSQPKGCKVPG--IEGSHGTGGLEPEPARDQWACQSTFENEAAVLC AIC        |
|                                                     | SLVADYVSAP--KDPQPETTSAGCFLCGTLVCSVFCS SCNEMLCEECDKRAHSHPVRAQH      |
| 00:1 Ac-AGGEAGADSCLR                                | -----                                                              |
| 01:9606 33228 NM_001310332 RNF31 Homo_sapiens       |                                                                    |
| 01:9606 33228 NM_017999 RNF31 Homo_sapiens          |                                                                    |
| 06:10116 33228 NM_001108868 Rnf31 Rattus_norvegicus | LRQTLPGVLQGTHLSPSLPASAQPRPQSTSL LALGDSSLS SPPNPA S AHL PWHCAACAMLN |
| 07:10090 33228 NM_194346 Rnf31 Mus_musculus         | LRQTLPGVLQGTHLSPSLPASAQPRPQSTSL LALGDSSLS SPPNPA S AHL PWHCAACAMLN |
| 09:8364 33228 NM_001097175 rnf31 Xenopus_tropicalis | LRHTLPGAHQTTNLS SLPASSQPRPHSSS-LAMGDSSLS SPPDPA NACL PWHCPTCATLN   |
|                                                     | LRQALPGSHQTASLS SLPASSQPRPPSSS-LALGDSSLS SPPDPA NACL PWHCLTCATLN   |
|                                                     | VRLPCGNTAKPRS-----LDQDSPSTVSSRPPWRCYSCHFEN                         |
| 00:1 Ac-AGGEAGADSCLR                                | -----                                                              |
| 01:9606 33228 NM_001310332 RNF31 Homo_sapiens       |                                                                    |
| 01:9606 33228 NM_017999 RNF31 Homo_sapiens          |                                                                    |
| 06:10116 33228 NM_001108868 Rnf31 Rattus_norvegicus | EPWAVLCVACDRPRGCKGLGLGTEGPQGTGGLEPDLARGRWACQ SCTFENEAAVLC SIC      |
| 07:10090 33228 NM_194346 Rnf31 Mus_musculus         | EPWAVLCVACDRPRGCKGLGLGTEGPQGTGGLEPDLARGRWACQ SCTFENEAAVLC SIC      |
| 09:8364 33228 NM_001097175 rnf31 Xenopus_tropicalis | EPWAVFCAACSQPKGCKV R G--RESSQGTGVLEPEPARDQWACQ SCTFENEAAVLC AIC    |
|                                                     | EPWAVFCAVCSQPKGCKVPG--IEGSHGTGGLEPEPARDQWACQ SCTFENEAAVLC AIC      |
|                                                     | KGGSVLCVVCERPRGCTSS L-----SNLSLGSTLQRDSWECQACTLQNSASAVLCAVC        |
| 00:1 Ac-AGGEAGADSCLR                                | -----                                                              |
| 01:9606 33228 NM_001310332 RNF31 Homo_sapiens       |                                                                    |
| 01:9606 33228 NM_017999 RNF31 Homo_sapiens          | ERPRLAQPPSLVVD SR-----DAGICLQPLQQ-----                             |
| 06:10116 33228 NM_001108868 Rnf31 Rattus_norvegicus | ERPRLAQPPSLVVD SR-----DAGICLQPLQQ-----                             |
| 07:10090 33228 NM_194346 Rnf31 Mus_musculus         | ERPRLAQPPSLVVD SH-----DAGVYQQPLKQ-----                             |
| 09:8364 33228 NM_001097175 rnf31 Xenopus_tropicalis | ERPRLAQPPSLVVD SH-----DAGVCQQSLKQ-----                             |
|                                                     | DRPRLASKPAQGDGYDSVALLRDIQRDNK SITCPVSEKNGLFAMKNHQESMHEPESIGPL      |
| 00:1 Ac-AGGEAGADSCLR                                | -----                                                              |
| 01:9606 33228 NM_001310332 RNF31 Homo_sapiens       |                                                                    |
| 01:9606 33228 NM_017999 RNF31 Homo_sapiens          | ---GDALLASAQSQVWYCIHCTFCN SSGWVCVMCNR TSSPIPAQHAP RPYASSLEKGGP     |
| 06:10116 33228 NM_001108868 Rnf31 Rattus_norvegicus | ---GDALLASAQSQVWYCIHCTFCN SSGWVCVMCNR TSSPIPAQHAP RPYASSLEKGGP     |
| 07:10090 33228 NM_194346 Rnf31 Mus_musculus         | ---EDTLLSAAQSQVWHCDHCTFCN SGPVWVCAMCNR TRSPIPAQP---YPS SLEKGLS     |
| 09:8364 33228 NM_001097175 rnf31 Xenopus_tropicalis | ---EDPLLTAAQPQVWYCDHCTFCN SGPVWVCAMCNR TRDPIPTQPALQSYPS SLEKGRP    |
|                                                     | IDHTRQEEEIAKSEGWQCSHCTFFNTRNGRVCEICDR TSEGTAATEQPKALDM-----        |
| 00:1 Ac-AGGEAGADSCLR                                | -----                                                              |
| 01:9606 33228 NM_001310332 RNF31 Homo_sapiens       |                                                                    |
| 01:9606 33228 NM_017999 RNF31 Homo_sapiens          | KPGPPRRLSAPLPSSCGDPEKQRQDKMREGLQLVSMIREGEAAGACPEE IFSALQYSGT       |
| 06:10116 33228 NM_001108868 Rnf31 Rattus_norvegicus | KPGSSQHLSSSLPASCGDPEKQRQDKMRKESLQLVNMIQEGEAAGASPEE IFSALQYSGT      |
| 07:10090 33228 NM_194346 Rnf31 Mus_musculus         | KPGSSQHLSSSLPASCGDPEKQRQDKMRKEGLQLVSMIQEGETAGASPEE VFSALQYSGT      |
| 09:8364 33228 NM_001097175 rnf31 Xenopus_tropicalis | -----AHVQEEIRQKRLREDGAKIVALIREGEKYGLVP EEVCSAIRYSGT                |
| 00:1 Ac-AGGEAGADSCLR                                | -----                                                              |
| 01:9606 33228 NM_001310332 RNF31 Homo_sapiens       |                                                                    |
| 01:9606 33228 NM_017999 RNF31 Homo_sapiens          | EVPLQWL RSEL PYVLEMVAELAGQQ-DPGLGAFSCQEARRAWLDRHGNLDEAVEECVRTR     |
|                                                     | EVPLQWL RSEL PYVLEMVAELAGQQ-DPGLGAFSCQEARRAWLDRHGNLDEAVEECVRTR     |

EVPLQWLRLSESYVLEMVAELAGQR-DPELGAFCSEQARKAWLDRHGNLDEAVEECVRR  
EVPLQWLRLSESYVLEMVAELAGQ-Q-DPELGAFCSEQARKAWLDRHGNLDEAVEECVRR  
EVPQWLQLTPELPPVLERLLDASQKAGDTIGALTVEEARDAWSSGGDMAAVILCVTER

```

RRKVKQLQSLGFGPPEEGLQALFQHGGDVSRALTELQQRLEPFRQLWDSGPEPTPSWD
RRKVKQLQSLGFGPPEEGLQALFQHGGDVSRALTELQQRLEPFRQLWDSGPEPTPSWD
RRKVKQLQSLGFGPEKGLQALFQHGGDVARALTELQQRLEPFRQLWDRDPEPTPCWD
RRKVHELQSLGFGPEKGLQALFQHGGDVARALTELQQRLEPFRQLWDRDPEPTPCWD
RRKVDALSGLGFPERHKVVAALYESAGDVGRLALSILQRLLEPFLIRMWEE-POPPRLD

```

GPDKQSLVRRLLAVYALPSWGRAELALSLLQETPRNYELGDVVEAVRHSQDRAFLRRLLA  
GPDKQSLVRRLLAVYALPSWGRAELALSLLQETPRNYELGDVVEAVRHSQDRAFLRRLLA  
GLDRQSLVRRLLAVYTLPSWGRAELALALLQETPRNYELLDVVEAVRHSQDRAFLRRLLA  
GLDRQSLVRRLLAVYTLPSWGRAELALALLQETPRNYELLDVVEAVRHSQDRAFLRRLLA  
SADRQAVLRRLLAEHSLHSWGRAELALSLLIEGEGRYELQDVVEAVRESQDRDFIKRMLT

QECACVGWALPHNRMQALTSCECTICPCDFCRQHTFTALKEKHITDMVCPACGRPLDITDDT  
QECACVGWALPHNRMQALTSCECTICPCDFCRQHTFTALKEKHITDMVCPACGRPLDITDDT  
QECACVGWALPHNRMQALISCECTICPECFRQHTFTALKEKHITDMVCPACGRPLDITDDA  
QECACVGWALPHNRMQALISCECTICPECFRQHTFTALKEKHITDMVCPACGRPLDITDDA  
QECACVGWELPNRMRSLTSCEBCTICPCDFRMHFTVAVKEKHITRDMICPACEEPIISDEG

QLLSYFSTLDIQLRESLEPDAYALFHKKLTGVLMRDPKFLWCAQCSFGFIYEREQLEAT  
QLLSYFSTLDIQLRESLEPDAYALFHKKLTGVLMRDPKFLWCAQCSFGFIYEREQLEAT  
QLLSYFSTLDIQLRESLEPDAYALFHKKLTAVLMRDPKFLWCAQCSFGFIYEREQLEAT  
QLLSYFSTLDIQLRESLEPDAYALFHKKLTAVLMRDPKFLWCAQCSFGFIYEREQLEAT  
ELHYFSTLDIQLRLDTEVDAYDLFHKKLTERTLMKDPKFLWCTHCSFGFIYERDQLDVK

CPQCHQTFCVCRCKRWEEQHRGRSCEDFNQWKRMDNPEYQAQGLAMYLQENGIDCPKCKF  
CPQCHQTFCVCRCKRWEEQHRGRSCEDFNQWKRMDNPEYQAQGLAMYLQENGIDCPKCKF  
CPQCHQTFCVCRCKRWEEQHRGRSCEDFNQWKRMDNPEYQAQGLAMYLQENGIDCPKCKF  
CPQCHQTFCVCRCKRWEEQHRGRSCEDFNQWKRMDNPEYQAQGLAMYLQENGIDCPKCKF  
CPQCQSFRCRCKRWEEQHRSLNCDDFNQWKRMDNPEYQAQGLAYVLLENGITCPHCKF

SYALARGGCMHFHCTQCRHQFCSGCYNAFYAKNKCEPNCRVKLSLGHGHPDCLFYLRD  
SYALARGGCMHFHCTQCRHQFCSGCYNAFYAKNKCEPNCRVKLSLGHGHPDCLFYLRD  
SYALARGGCMHFHCTQCRHQFCSGCYNAFYAKNKCPDNCVKVLSLGHGHPDCLFYLRD  
SYALARGGCMHFHCTQCRHQFCSGCYNAFYAKNKCPDNCVKVLSLGHGHPDCLFYLRD  
SYALARGGCMHFCISQCRHQFCSGCYNTFHQRNKCTVPSTVRMSLHAHHHPDCLFYLRD

WTALRLQKLLQDNVVMFNTPEPPAGARAVPGGGCRVIEQKEVPNGLRDEACGKETPPAGYAG  
WTALRLQKLLQDNVVMFNTPEPPAGARAVPGGGCRVIEQKEVPNGLRDEACGKETPPAGYAG  
WPAARLQKLLQDNVVMFNTPEPPAGTRAVPGGGCRVMEQKEVPSGFRDEACGKETPPGYAG  
WTAARLQKLLQDNVVMFNTPEPPAGTRAVPGGGCRVMEQKEVHSGFRDEACGKETPPGYAG  
WDVTRLQKLLQMLLVQFNTPDPAGTQTAPGGGCRVMEQKEIPDLGRDEACGKITPPGYAG

LCQAHYKEYLVSLINAHSLDPATLYEVEELETATERYLHVRPQPLAGEDPPAYQARLLQK  
LCQAHYKEYLVSLINAHSLDPATLYEVEELETATERYLHVRPQPLAGEDPPAYQARLLQK  
LCQAHYKEYLVSLINAHSLDPATLYEVEELETATERYLHLTPQMPDGEDLPAYQARLLQK  
LCQAHYKEYLVSLINAHSLDPATLYEVEELETATIRYLHLAPQMPDGEDLPAYQARLLQK  
LCESHYKEYLVSRINAHSLDCVLYDLAETMNVQCRYLPLQDPDTEDESPAYQRELLGV

-----  
LTEEVPLGQSIPRRRK  
LTEEVPLGQSIPRRRK  
LREEVPLGQSIARRRK  
LREEVPLGQSIARRRK  
LISEVPLSMNIPRKQN

*USP9X*

Ac-AKICPVSSMTATTR

CLUSTAL O(1.2.1) multiple sequence alignment

|                                                       |                                                              |
|-------------------------------------------------------|--------------------------------------------------------------|
| 00:1 Ac-AKICPVSSMTATTR                                | -----AKICPVSSM-----TATTR-----                                |
| 01:9606 3418 0#NP_001034679 USP9X Homo_sapiens        | -----M-----TATTRGSP---                                       |
| 01:9606 3418 0#NP_001034680 USP9X Homo_sapiens        | -----M-----TATTRGSP---                                       |
| 01:9606 3418 NM_001039590 USP9X Homo_sapiens          | -----ADKIAKICPVSSM-----TATTRGSP---                           |
| 01:9606 3418 NM_001039591 USP9X Homo_sapiens          | -----ADKIAKICPVSSM-----TATTRGSP---                           |
| 01:9606 3418 NM_004652 USP9X Homo_sapiens             | -----ADKIAKICPVSSM-----TATTRGSP---                           |
| 01:9606 3418 NM_021906 USP9X Homo_sapiens             | -----ADKIAKICPVSSM-----TATTRGSP---                           |
| 06:10116 3418 NM_001135893 Usp9x Rattus_norvegicus    | -----ADKIAKICPVSSM-----TATTRGSP---                           |
| 06:10116 3418 NM_001135923 Usp9x Rattus_norvegicus    | -----ADKIAKICPVSSM-----TATTRGSP---                           |
| 07:10090 3418 NM_009481 Usp9x Mus_musculus            | -----ADKIAKICPVSSM-----TATTRGSP---                           |
| 10:7955 3418 NM_001077449 usp9 Danio_rerio            | -----M-----TATTRGSP---                                       |
| 12:7227 3418 NM_001260458 faf Drosophila_melanogaster | SSCINIRFRCSAERVGWRGYPATMTFDTRRHTTGQPGSTAPSSSSSTSTTTTTTSPAQS  |
| 12:7227 3418 NM_001260459 faf Drosophila_melanogaster | SSCINIRFRCSAERVGWRGYPATMTFDTRRHTTGQPGSTAPSSSSSTSTTTTTTSPAQS  |
| 12:7227 3418 NM_001260460 faf Drosophila_melanogaster | SSCINIRFRCSAERVGWRGYPATMTFDTRRHTTGQPGSTAPSSSSSTSTTTTTTSPAQS  |
| 12:7227 3418 NM_001260461 faf Drosophila_melanogaster | SSCINIRFRCSAERVGWRGYPATMTFDTRRHTTGQPGSTAPSSSSSTSTTTTTTSPAQS  |
| 12:7227 3418 NM_001300698 faf Drosophila_melanogaster | SSCINIRFRCSAERVGWRGYPATMTFDTRRHTTGQPGSTAPSSSSSTSTTTTTTSPAQS  |
| 12:7227 3418 NM_079873 faf Drosophila_melanogaster    | SSCINIRFRCSAERVGWRGYPATMTFDTRRHTTGQPGSTAPSSSSSTSTTTTTTSPAQS  |
| 12:7227 3418 NM_170576 faf Drosophila_melanogaster    | SSCINIRFRCSAERVGWRGYPATMTFDTRRHTTGQPGSTAPSSSSSTSTTTTTTSPAQS  |
|                                                       | *: **                                                        |
| 00:1 Ac-AKICPVSSMTATTR                                | -----                                                        |
| 01:9606 3418 0#NP_001034679 USP9X Homo_sapiens        | VGGNDNQQAPDQGSQPPLQQNQTSPPDSSNENSPATP-----PDEQGGQDAP         |
| 01:9606 3418 0#NP_001034680 USP9X Homo_sapiens        | VGGNDNQQAPDQGSQPPLQQNQTSPPDSSNENSPATP-----PDEQGGQDAP         |
| 01:9606 3418 NM_001039590 USP9X Homo_sapiens          | VGGNDNQQAPDQGSQPPLQQNQTSPPDSSNENSPATP-----PDEQGGQDAP         |
| 01:9606 3418 NM_001039591 USP9X Homo_sapiens          | VGGNDNQQAPDQGSQPPLQQNQTSPPDSSNENSPATP-----PDEQGGQDAP         |
| 01:9606 3418 NM_004652 USP9X Homo_sapiens             | VGGNDNQQAPDQGSQPPLQQNQTSPPDSSNENSPATP-----PDEQGGQDAP         |
| 01:9606 3418 NM_021906 USP9X Homo_sapiens             | VGGNDNQQAPDQGSQPPLQQNQTSPPDSSNENSPATP-----PDEQGGQDAP         |
| 06:10116 3418 NM_001135893 Usp9x Rattus_norvegicus    | VGGNDNQQAPDQGSQPPLQQNQTSPPDSSNENSPATP-----PDEQGGQDAP         |
| 06:10116 3418 NM_001135923 Usp9x Rattus_norvegicus    | VGGNDNQQAPDQGSQPPLQQNQTSPPDSSNENSPATP-----PDEQGGQDAP         |
| 07:10090 3418 NM_009481 Usp9x Mus_musculus            | VGGNDNQQAPDQGSQPPLQQNQTSPPDSSNENSPATP-----PDEQGGQDAP         |
| 10:7955 3418 NM_001077449 usp9 Danio_rerio            | VGGNDNQQAPDQGSQPPLQPNQTSPPNSSNENSPVSP-----PDDQGGQDSP         |
| 12:7227 3418 NM_001260458 faf Drosophila_melanogaster | AGSGSGIGTGTGTVANSSLPGGGSGSLDGNQDQQPATDSQSSDDVAASLSANSVDSTITI |
| 12:7227 3418 NM_001260459 faf Drosophila_melanogaster | AGSGSGIGTGTGTVANSSLPGGGSGSLDGNQDQQPATDSQSSDDVAASLSANSVDSTITI |
| 12:7227 3418 NM_001260460 faf Drosophila_melanogaster | AGSGSGIGTGTGTVANSSLPGGGSGSLDGNQDQQPATDSQSSDDVAASLSANSVDSTITI |
| 12:7227 3418 NM_001260461 faf Drosophila_melanogaster | AGSGSGIGTGTGTVANSSLPGGGSGSLDGNQDQQPATDSQSSDDVAASLSANSVDSTITI |
| 12:7227 3418 NM_001300698 faf Drosophila_melanogaster | AGSGSGIGTGTGTVANSSLPGGGSGSLDGNQDQQPATDSQSSDDVAASLSANSVDSTITI |
| 12:7227 3418 NM_079873 faf Drosophila_melanogaster    | AGSGSGIGTGTGTVANSSLPGGGSGSLDGNQDQQPATDSQSSDDVAASLSANSVDSTITI |
| 12:7227 3418 NM_170576 faf Drosophila_melanogaster    | AGSGSGIGTGTGTVANSSLPGGGSGSLDGNQDQQPATDSQSSDDVAASLSANSVDSTITI |
| 00:1 Ac-AKICPVSSMTATTR                                | -----                                                        |
| 01:9606 3418 0#NP_001034679 USP9X Homo_sapiens        | PQLEDEEPAFPHTDLAKLDDMINRPRWVVPVLPKGELEVLLAAIDLKKGLDVKSEACQ   |
| 01:9606 3418 0#NP_001034680 USP9X Homo_sapiens        | PQLEDEEPAFPHTDLAKLDDMINRPRWVVPVLPKGELEVLLAAIDLKKGLDVKSEACQ   |
| 01:9606 3418 NM_001039590 USP9X Homo_sapiens          | PQLEDEEPAFPHTDLAKLDDMINRPRWVVPVLPKGELEVLLAAIDLKKGLDVKSEACQ   |
| 01:9606 3418 NM_001039591 USP9X Homo_sapiens          | PQLEDEEPAFPHTDLAKLDDMINRPRWVVPVLPKGELEVLLAAIDLKKGLDVKSEACQ   |
| 01:9606 3418 NM_004652 USP9X Homo_sapiens             | PQLEDEEPAFPHTDLAKLDDMINRPRWVVPVLPKGELEVLLAAIDLKKGLDVKSEACQ   |
| 01:9606 3418 NM_021906 USP9X Homo_sapiens             | PQLEDEEPAFPHTDLAKLDDMINRPRWVVPVLPKGELEVLLAAIDLKKGLDVKSEACQ   |
| 06:10116 3418 NM_001135893 Usp9x Rattus_norvegicus    | PQLEDEEPAFPHTDLAKLDDMINRPRWVVPVLPKGELEVLLAAIDLKKGLDVKSEACQ   |
| 06:10116 3418 NM_001135923 Usp9x Rattus_norvegicus    | PQLEDEEPAFPHTDLAKLDDMINRPRWVVPVLPKGELEVLLAAIDLKKGLDVKSEACQ   |
| 07:10090 3418 NM_009481 Usp9x Mus_musculus            | TPLEEEEPAPFHTELAKLDDMINRPRWVVPVLPKGELEVLLAAIDLCKKGLDVKCEACQ  |
| 10:7955 3418 NM_001077449 usp9 Danio_rerio            | VPPEKLISFPPTTKLRSLTQKISNPRWVVPVLPQELEVLLNAAIELTQAGVDHDCPCV   |
| 12:7227 3418 NM_001260458 faf Drosophila_melanogaster | VPPEKLISFPPTTKLRSLTQKISNPRWVVPVLPQELEVLLNAAIELTQAGVDHDCPCV   |
| 12:7227 3418 NM_001260459 faf Drosophila_melanogaster | VPPEKLISFPPTTKLRSLTQKISNPRWVVPVLPQELEVLLNAAIELTQAGVDHDCPCV   |
| 12:7227 3418 NM_001260460 faf Drosophila_melanogaster | VPPEKLISFPPTTKLRSLTQKISNPRWVVPVLPQELEVLLNAAIELTQAGVDHDCPCV   |
| 12:7227 3418 NM_001260461 faf Drosophila_melanogaster | VPPEKLISFPPTTKLRSLTQKISNPRWVVPVLPQELEVLLNAAIELTQAGVDHDCPCV   |
| 12:7227 3418 NM_001300698 faf Drosophila_melanogaster | VPPEKLISFPPTTKLRSLTQKISNPRWVVPVLPQELEVLLNAAIELTQAGVDHDCPCV   |
| 12:7227 3418 NM_079873 faf Drosophila_melanogaster    | VPPEKLISFPPTTKLRSLTQKISNPRWVVPVLPQELEVLLNAAIELTQAGVDHDCPCV   |
| 12:7227 3418 NM_170576 faf Drosophila_melanogaster    | VPPEKLISFPPTTKLRSLTQKISNPRWVVPVLPQELEVLLNAAIELTQAGVDHDCPCV   |
| 00:1 Ac-AKICPVSSMTATTR                                | -----                                                        |
| 01:9606 3418 0#NP_001034679 USP9X Homo_sapiens        | RFFRDGLTISFTKILTDEAVSGWKFEIHRCIINNTHRLVELCVAKLSQDWFPLLELLAMA |
| 01:9606 3418 0#NP_001034680 USP9X Homo_sapiens        | RFFRDGLTISFTKILTDEAVSGWKFEIHRCIINNTHRLVELCVAKLSQDWFPLLELLAMA |
| 01:9606 3418 NM_001039590 USP9X Homo_sapiens          | RFFRDGLTISFTKILTDEAVSGWKFEIHRCIINNTHRLVELCVAKLSQDWFPLLELLAMA |
| 01:9606 3418 NM_001039591 USP9X Homo_sapiens          | RFFRDGLTISFTKILTDEAVSGWKFEIHRCIINNTHRLVELCVAKLSQDWFPLLELLAMA |
| 01:9606 3418 NM_004652 USP9X Homo_sapiens             | RFFRDGLTISFTKILTDEAVSGWKFEIHRCL-----VELCVAKLSQDWFPLLELLAMA   |
| 01:9606 3418 NM_021906 USP9X Homo_sapiens             | RFFRDGLTISFTKILTDEAVSGWKFEIHRCL-----VELCVAKLSQDWFPLLELLAMA   |
| 06:10116 3418 NM_001135893 Usp9x Rattus_norvegicus    | RFFRDGLTISFTKILTDEAVSGWKFEIHRCIINNTHRLVELCVAKLAQDWFPLLELLAMA |
| 06:10116 3418 NM_001135923 Usp9x Rattus_norvegicus    | RFFRDGLTISFTKILTDEAVSGWKFEIHRCIINNTHRLVELCVAKLAQDWFPLLELLAMA |
| 07:10090 3418 NM_009481 Usp9x Mus_musculus            | RFFRDGLTISFTKILTDEAVSGWKFEIHRCIINNTHRLVELCVAKLAQDWFPLLELLAMA |
| 10:7955 3418 NM_001077449 usp9 Danio_rerio            | RFFRDGLTISFTKILTDEAVSGWKFEIHRCIINNAHRLVELCVTKLSQDWFPLLELLAMA |
| 12:7227 3418 NM_001260458 faf Drosophila_melanogaster | EFYRNGLTSTFAKILTDEAVNSWKNNIHHCILVSCGKLLHLIAIHMQRDNPYLLDLLAIV |
| 12:7227 3418 NM_001260459 faf Drosophila_melanogaster | EFYRNGLTSTFAKILTDEAVNSWKNNIHHCILVSCGKLLHLIAIHMQRDNPYLLDLLAIV |
| 12:7227 3418 NM_001260460 faf Drosophila_melanogaster | EFYRNGLTSTFAKILTDEAVNSWKNNIHHCILVSCGKLLHLIAIHMQRDNPYLLDLLAIV |
| 12:7227 3418 NM_001260461 faf Drosophila_melanogaster | EFYRNGLTSTFAKILTDEAVNSWKNNIHHCILVSCGKLLHLIAIHMQRDNPYLLDLLAIV |
| 12:7227 3418 NM_001300698 faf Drosophila_melanogaster | EFYRNGLTSTFAKILTDEAVNSWKNNIHHCILVSCGKLLHLIAIHMQRDNPYLLDLLAIV |
| 12:7227 3418 NM_079873 faf Drosophila_melanogaster    | EFYRNGLTSTFAKILTDEAVNSWKNNIHHCILVSCGKLLHLIAIHMQRDNPYLLDLLAIV |
| 12:7227 3418 NM_170576 faf Drosophila_melanogaster    | EFYRNGLTSTFAKILTDEAVNSWKNNIHHCILVSCGKLLHLIAIHMQRDNPYLLDLLAIV |
| 00:1 Ac-AKICPVSSMTATTR                                | -----                                                        |
| 01:9606 3418 0#NP_001034679 USP9X Homo_sapiens        | LNPHCKFHIYNGTRPCESVSSS----VQLPEDELFAR-SPDPRSPKGWLVDLLNKGFTLN |
| 01:9606 3418 0#NP_001034680 USP9X Homo_sapiens        | LNPHCKFHIYNGTRPCESVSSS----VQLPEDELFAR-SPDPRSPKGWLVDLLNKGFTLN |

[illegible][illegible][illegible][illegible]

```
00:01|Ac-AKICPVSSMTATTR
01:9606|3418|0#NP_001034679|USP9X|Homo_sapiens
01:9606|3418|0#NP_001034680|USP9X|Homo_sapiens
01:9606|3418|NM_001039590|USP9X|Homo_sapiens
01:9606|3418|NM_001039591|USP9X|Homo_sapiens
01:9606|3418|NM_004652|USP9X|Homo_sapiens
01:9606|3418|NM_021906|USP9X|Homo_sapiens
06:10116|3418|NM_001135893|Usp9x|Rattus_norvegicus
06:10116|3418|NM_001135923|Usp9x|Rattus_norvegicus
07:10090|3418|NM_009481|Usp9x|Mus_musculus
10:7955|3418|NM_001077449|usp9|Danio_rerio
12:7227|3418|NM_001260458|faf|Drosophila_melanogaster
12:7227|3418|NM_001260459|faf|Drosophila_melanogaster
12:7227|3418|NM_001260460|faf|Drosophila_melanogaster
12:7227|3418|NM_001260461|faf|Drosophila_melanogaster
```

[illegible]















ILLIDDSWQHRIHNALNGVAEEREGLLETIQRAKTHYQKRAYQIIKCLTQLFHKSPIAL

-----

[illegible]

-----

ARMTLAKACELCPREEKKATSQQIEMEESKEPDDQADAPDEHESPPPED-APLYPHSPGS  
 ARMTLAKACELCPREE-----EPDDQADAPDEHESPPPED-APLYPHSPGS  
 ARMTLAKACELCPREEVKKATSQQIEMEESKEPDDQADAPDEHESPPPED-APLYPHSPGS  
 ARMTLAKACELCPREE-----EPDDQADAPDEHESPPPED-APLYPHSPGS  
 ARMTLAKACELCPREEVKKATSQQIEMEESKEPDDQADAPDEHESPPPED-APLYPHSPGS  
 ARMTLAKACELCPREE-----EPDDQADAPDEHESPPPED-APLYPHSPGS  
 ARMTLAKACELCPREE-----EPDDQADAPDEHESPPPED-APLYPHSPGS  
 ARMTLAKACELCPREE-----EPDDQADAPDEHESPPPED-APLYPHSPGS  
 ARMTLAKACELCPREE-----EPDDQADAPDEHESPPPED-APLYPHSPGS  
 ARMTLAKACELCPREE-----EPDDQADAPDEHESPPPED-APLYPHSPGS  
 AKNTWSMAFELCPDEE-----DENN-----EPNLETNMDENKSEPAVQPGGVLEGSTGG  
 AKNTWSMAFELCPDEVSEKTDENN-----EPNLETNMDENKSEPAVQPGGVLEGSTGG  
 AKNTWSMAFELCPDEVSEKTDENN-----EPNLETNMDENKSEPAVQPGGVLEGSTGG  
 AKNTWSMAFELCPDEE-----DENN-----EPNLETNMDENKSEPAVQPGGVLEGSTGG  
 AKNTWSMAFELCPDEVSEKTDENN-----EPNLETNMDENKSEPAVQPGGVLEGSTGG  
 AKNTWSMAFELCPDEVSEKTDENN-----EPNLETNMDENKSEPAVQPGGVLEGSTGG

-----

[illegible]

-----

```
RTGQRAQENYEGSEE--VSPPPQTK-----DQ-----
RTGQRAQENYEGSEE--VSPPPQTK-----DQ-----
RTGQRAQENYEGSEE--VSPPPQTK-----DQ-----
RTGQRAQENYEGSEE--VSPPPQTK-----DQ-----
RTGQRAQENYEGSEE--VSPPPQTK-----DQ-----
RTGQRAQENYEGSEE--VSPPPQTK-----DQ-----
RTGQRAQENYEGSEE--VSPPPQTK-----DQ-----
RTGQRAQENYEGSEE--VSPPPQTK-----DQ-----
RPGPAGNENWPEPPEE--TPQPSTQ-----KD-----
TAGSGANSETESSAQETTGETTINGLNTSLNDQMEITAKKKCRRVIIKKLVESKDEEDATT
TAGSGANSETESSAQETTGETTINGLNTSLNDQMEITAKKKGVRSRSGGGKLPPVL-----
TAGSGANSETESSAQETTGETTINGLNTSLNDQMEITAKKKGVRSRSGGGKLPPVL-----
TAGSGANSETESSAQETTGETTINGLNTSLNDQMEITAKKKCRRVIIKKLVESKDEEDATT
TAGSGANSETESSAQETTGETTINGLNTSLNDQMEITAKKKCRRVIIKKLVESKDEEDATT
TAGSGANSETESSAQETTGETTINGLNTSLNDQMEITAKKKCRRVIIKKLVESKDEEDATT
TAGSGANSETESSAQETTGETTINGLNTSLNDQMEITAKKVTRANNV-----
```

-----

\_\_\_\_\_

\_\_\_\_\_

\_\_\_\_\_

|          |      |              |       |                         |                                                             |
|----------|------|--------------|-------|-------------------------|-------------------------------------------------------------|
| 01:9606  | 3418 | NM_001039590 | USP9X | Homo_sapiens            | -----                                                       |
| 01:9606  | 3418 | NM_001039591 | USP9X | Homo_sapiens            | -----                                                       |
| 01:9606  | 3418 | NM_004652    | USP9X | Homo_sapiens            | -----                                                       |
| 01:9606  | 3418 | NM_021906    | USP9X | Homo_sapiens            | -----                                                       |
| 06:10116 | 3418 | NM_001135893 | Usp9x | Rattus_norvegicus       | -----                                                       |
| 06:10116 | 3418 | NM_001135923 | Usp9x | Rattus_norvegicus       | -----                                                       |
| 07:10090 | 3418 | NM_009481    | Usp9x | Mus_musculus            | -----                                                       |
| 10:7955  | 3418 | NM_001077449 | usp9  | Danio_rerio             | -----                                                       |
| 12:7227  | 3418 | NM_001260458 | faf   | Drosophila_melanogaster | ATTAATTEVTTSPATAIATAATLEPAGMSELTTMVEKNLIIISQENPQAKSSLQ----- |
| 12:7227  | 3418 | NM_001260459 | faf   | Drosophila_melanogaster | -----FHHHQLPPEQQLKLKQQQQ--QQQQQHQLRGDINKTSSSRL              |
| 12:7227  | 3418 | NM_001260460 | faf   | Drosophila_melanogaster | -----FHHHQLPPEQQLKLKQQQQ--QQQQQHQLRGDINKTSSSRL              |
| 12:7227  | 3418 | NM_001260461 | faf   | Drosophila_melanogaster | ATTAATTEVTTSPATAIATAATLEPAGMSELTTMVEKNLIIISQENPQAKSSLQ----- |
| 12:7227  | 3418 | NM_001300698 | faf   | Drosophila_melanogaster | ATTAATTEVTTSPATAIATAATLEPAGMSELTTMVEKNLIIISQENPQAKSSLQ----- |
| 12:7227  | 3418 | NM_079873    | faf   | Drosophila_melanogaster | ATTAATTEVTTSPATAIATAATLEPAGMSELTTMVEKNLIIISQENPQAKSSLQ----- |
| 12:7227  | 3418 | NM_170576    | faf   | Drosophila_melanogaster | -----                                                       |

|          |                   |                                          |
|----------|-------------------|------------------------------------------|
| 00:1     | Ac-AKICPVSSMTATTR | -                                        |
| 01:9606  | 3418              | 0#NP_001034679 USP9X Homo_sapiens        |
| 01:9606  | 3418              | 0#NP_001034680 USP9X Homo_sapiens        |
| 01:9606  | 3418              | NM_001039590 USP9X Homo_sapiens          |
| 01:9606  | 3418              | NM_001039591 USP9X Homo_sapiens          |
| 01:9606  | 3418              | NM_004652 USP9X Homo_sapiens             |
| 01:9606  | 3418              | NM_021906 USP9X Homo_sapiens             |
| 06:10116 | 3418              | NM_001135893 Usp9x Rattus_norvegicus     |
| 06:10116 | 3418              | NM_001135923 Usp9x Rattus_norvegicus     |
| 07:10090 | 3418              | NM_009481 Usp9x Mus_musculus             |
| 10:7955  | 3418              | NM_001077449 usp9 Danio_rerio            |
| 12:7227  | 3418              | NM_001260458 faf Drosophila_melanogaster |
| 12:7227  | 3418              | NM_001260459 faf Drosophila_melanogaster |
| 12:7227  | 3418              | NM_001260460 faf Drosophila_melanogaster |
| 12:7227  | 3418              | NM_001260461 faf Drosophila_melanogaster |
| 12:7227  | 3418              | NM_001300698 faf Drosophila_melanogaster |
| 12:7227  | 3418              | NM_079873 faf Drosophila_melanogaster    |
| 12:7227  | 3418              | NM_170576 faf Drosophila_melanogaster    |

*TRAPPC12*

Ac-AAGDPLAQLQWAGGR

CLUSTAL O(1.2.1) multiple sequence alignment

00:1|Ac-AAGDPLAQLQWAGGR  
01:9606|34805|0#NP\_057114|TRAPPC12|Homo\_sapiens  
01:9606|34805|NM\_016030|TRAPPC12|Homo\_sapiens  
07:10090|34805|NM\_001161410|Trappc12|Mus\_musculus  
07:10090|34805|NM\_001161411|Trappc12|Mus\_musculus  
07:10090|34805|NM\_178811|Trappc12|Mus\_musculus  
09:8364|34805|NM\_001006868|trappc12|Xenopus\_tropicalis  
10:7955|34805|NM\_001080644|trappc12|Danio\_rerio  
12:7227|34805|NM\_140998|CG11396|Drosophila\_melanogaster  
15:3702|34805|NM\_120145|AT4G39820|Arabidopsis\_thaliana

00:1|Ac-AAGDPLAQLQWAGGR  
01:9606|34805|0#NP\_057114|TRAPPC12|Homo\_sapiens  
01:9606|34805|NM\_016030|TRAPPC12|Homo\_sapiens  
07:10090|34805|NM\_001161410|Trappc12|Mus\_musculus  
07:10090|34805|NM\_001161411|Trappc12|Mus\_musculus  
07:10090|34805|NM\_178811|Trappc12|Mus\_musculus  
09:8364|34805|NM\_001006868|trappc12|Xenopus\_tropicalis  
10:7955|34805|NM\_001080644|trappc12|Danio\_rerio  
12:7227|34805|NM\_140998|CG11396|Drosophila\_melanogaster  
15:3702|34805|NM\_120145|AT4G39820|Arabidopsis\_thaliana

00:1|Ac-AAGDPLAQLQWAGGR  
01:9606|34805|0#NP\_057114|TRAPPC12|Homo\_sapiens  
01:9606|34805|NM\_016030|TRAPPC12|Homo\_sapiens  
07:10090|34805|NM\_001161410|Trappc12|Mus\_musculus  
07:10090|34805|NM\_001161411|Trappc12|Mus\_musculus  
07:10090|34805|NM\_178811|Trappc12|Mus\_musculus  
09:8364|34805|NM\_001006868|trappc12|Xenopus\_tropicalis  
10:7955|34805|NM\_001080644|trappc12|Danio\_rerio  
12:7227|34805|NM\_140998|CG11396|Drosophila\_melanogaster  
15:3702|34805|NM\_120145|AT4G39820|Arabidopsis\_thaliana

00:1|Ac-AAGDPLAQLQWAGGR  
01:9606|34805|0#NP\_057114|TRAPPC12|Homo\_sapiens  
01:9606|34805|NM\_016030|TRAPPC12|Homo\_sapiens  
07:10090|34805|NM\_001161410|Trappc12|Mus\_musculus  
07:10090|34805|NM\_001161411|Trappc12|Mus\_musculus  
07:10090|34805|NM\_178811|Trappc12|Mus\_musculus  
09:8364|34805|NM\_001006868|trappc12|Xenopus\_tropicalis  
10:7955|34805|NM\_001080644|trappc12|Danio\_rerio  
12:7227|34805|NM\_140998|CG11396|Drosophila\_melanogaster  
15:3702|34805|NM\_120145|AT4G39820|Arabidopsis\_thaliana

00:1|Ac-AAGDPLAQLQWAGGR  
01:9606|34805|0#NP\_057114|TRAPPC12|Homo\_sapiens  
01:9606|34805|NM\_016030|TRAPPC12|Homo\_sapiens  
07:10090|34805|NM\_001161410|Trappc12|Mus\_musculus  
07:10090|34805|NM\_001161411|Trappc12|Mus\_musculus  
07:10090|34805|NM\_178811|Trappc12|Mus\_musculus  
09:8364|34805|NM\_001006868|trappc12|Xenopus\_tropicalis  
10:7955|34805|NM\_001080644|trappc12|Danio\_rerio  
12:7227|34805|NM\_140998|CG11396|Drosophila\_melanogaster  
15:3702|34805|NM\_120145|AT4G39820|Arabidopsis\_thaliana

00:1|Ac-AAGDPLAQLQWAGGR  
01:9606|34805|0#NP\_057114|TRAPPC12|Homo\_sapiens  
01:9606|34805|NM\_016030|TRAPPC12|Homo\_sapiens  
07:10090|34805|NM\_001161410|Trappc12|Mus\_musculus  
07:10090|34805|NM\_001161411|Trappc12|Mus\_musculus  
07:10090|34805|NM\_178811|Trappc12|Mus\_musculus  
09:8364|34805|NM\_001006868|trappc12|Xenopus\_tropicalis  
10:7955|34805|NM\_001080644|trappc12|Danio\_rerio  
12:7227|34805|NM\_140998|CG11396|Drosophila\_melanogaster  
15:3702|34805|NM\_120145|AT4G39820|Arabidopsis\_thaliana

00:1|Ac-AAGDPLAQLQWAGGR  
01:9606|34805|0#NP\_057114|TRAPPC12|Homo\_sapiens  
01:9606|34805|NM\_016030|TRAPPC12|Homo\_sapiens  
07:10090|34805|NM\_001161410|Trappc12|Mus\_musculus  
07:10090|34805|NM\_001161411|Trappc12|Mus\_musculus  
07:10090|34805|NM\_178811|Trappc12|Mus\_musculus  
09:8364|34805|NM\_001006868|trappc12|Xenopus\_tropicalis  
10:7955|34805|NM\_001080644|trappc12|Danio\_rerio  
12:7227|34805|NM\_140998|CG11396|Drosophila\_melanogaster  
15:3702|34805|NM\_120145|AT4G39820|Arabidopsis\_thaliana

-----AAGDPLAQ  
SGLGAGPRVPASGLSRTRRAAARHAQAYRAPRGCFLSDSRLLSPSSRTLVTAAAGDPLAQ  
-----SSVI-----SSDPFRL  
-----P  
-----P  
-----  
-----  
-----  
-----

L---QWAGGR-----  
-----MEDAGGGEETPAPEAP-----HPPQLAPPEEQGLLFQEETIDL  
L---QWAGGRVMEAGGGEETPAPEAP-----HPPQLAPPEEQGLLFQEETIDL  
WVTRPQGRVADNMETAKDGEQSPSEASPSAQAG-PE-NIPEPMSREEESQPLYHEETIDL  
ILCAPCGFGQDNMETAKDGEQSPSEASPSAQAG-PE-NIPEPMSREEESQPLYHEETIDL  
ILCAPCGFGQDNMETAKDGEQSPSEASPSAQAG-PE-NIPEPMSREEESQPLYHEETIDL  
-----KGEMEKLETSN-----EDEAGTS-RE-EVGPNDIKLIQEEILFNEETIDL  
-----QAGLMDSSSEGPAQRPIITLIDAGIETPETSVPFQ---NDLTEASFRESIDL  
-----

-----  
GGDEFGSEENETASEGSSPLADKLNHEHMMESVLISDSPN-SEGDAAGDLGRVRDEAEPGGE  
GGDEFGSEENETASEGSSPLADKLNHEHMMESVLISDSPN-SEGDAAGDLGRVRDEAEPGGE  
GGDEFASEENEPTSEGSNHNFGDKLNHEHMMESVLISDSPNNSEGDVGLGCLQDVGEPPRG  
GGDEFASEENEPTSEGSNHNFGDKLNHEHMMESVLISDSPNNSEGDVGLGCLQDVGEPPRG  
GGDEFASEENEPTSEGSNHNFGDKLNHEHMMESVLISDSPNNSEGDVGLGCLQDVGEPPRG  
GGDEFASEENEPTSEGSNHNFGDKLNHEHMMESVLISDSPNNSEGDVGLGCLQDVGEPPRG  
DADAFGSEENVTLSEDSGNLLDKLNDQMMESVLIISDSPNISSEDDAGELGCLQDIVDEIES  
DVENFASPDQDST--HSESLMDKLNQMMESVMIISDSPNSEEEDAVPIDSLVLGQNDDE  
-----

-----  
GDPGPEPA-----GTPSPSGEADGDCAPEDAA-----  
GDPGPEPA-----GTPSPSGEADGDCAPEDAA-----  
ATDHRLPSSSTDKVVDVTLNNGSETDGGDTPRDISMTTPDSRASLKEDSTQEDVTSMPALE  
ATDHRLPSSSTDKVVDVTLNNGSETDGGDTPRDISMTTPDSRASLKEDSTQEDVTSMPALE  
ATDHRLPSSSTDKVVDVTLNNGSETDGGDTPRDISMTTPDSRASLKEDSTQEDVTSMPALE  
HEVLPLEQEIINKECKESG-NSTEHAGTH---DSAS-----S-GQGHVEIKVV-----  
E-----ASKTPDPDAEEPKNK---DSADHEETSEGLLEEKKQEEKIIQA-----  
-----

-----  
-----PSSGGAPRQDAAREVPGSE-----AARPEQEPPVAEPVPVCTIFSQRAPPA-  
-----PSSGGAPRQDAAREVPGSE-----AARPEQEPPVAEPVPVCTIFSQRAPPA-  
NAATEEVGPKDSLAPREEQTS-----EVSSNQSSSKDEPLPVCTIFSQATATPS  
NAATEEVGPKDSLAPREEQTS-----EVSSNQSSSKDEPLPVCTIFSQATATPS  
NAATEEVGPKDSLAPREEQTS-----EVSSNQSSSKDEPLPVCTIFSQATATPS  
-----VSPS-EPSPAEANTLQSPSPSEHEHELVTDPKQPSQSDVIVPVCTIFSKGN---S  
DDDKREITPNNLETPEQ-----DASIEINTISTPREDPVPVCTIFSQAAQPKT  
-----

-----  
-----SGDGFEPQMVKSPSFGGA-SEASARTPPQVVQPSPSLSTFFGDTAASHSLASDFF  
-----SGDGFEPQMVKSPSFGGA-SEASARTPPQVVQPSPSLSTFFGDTAASHSLASDFF  
QPHLFLQDGFESQMVKSPSFSST-SETSAKTPPPMVQPSPSLSTFFGDTMSSNSLASDFF  
QPHLFLQDGFESQMVKSPSFSST-SETSAKTPPPMVQPSPSLSTFFGDTMSSNSLASDFF  
QPHLFLQDGFESQMVKSPSFSST-SETSAKTPPPMVQPSPSLSTFFGDTMSSNSLASDFF  
QPSFLGSDGFESQLIKSPSFTGE-IKSTTKLQTVVQPSPSLNNFSDNGNTQSPAADFF  
Q--ALVPDGFQPTLVKSPSFTTGTSTETPNKLIPQVCQPSPSLSKFFTDNGAV-NPASDFF  
-----KP-----IE-----KPSKKDMSHKISEYFAND-----PPSFF  
-----

-----  
DSFTTS-AFISVSNPGAGSPAPASPPPLAVPGTEGRPEPVAM-----RGPQAA  
DSFTTS-AFISVSNPGAGSPAPASPPPLAVPGTEGRPEPVAM-----RGPQAA  
DSFTTS-TFISVSNPNAGSPVPEKLSLTPAVGEKSPDSTSPSYSTRMDRSESGVSRAPL  
DSFTTS-TFISVSNPNAGSPVPEKLSLTPAVGEKSPDSTSPSYSTRMDRSESGVSRAPL  
DSFTTS-TFISVSNPNAGSPVPEKLSLTPAVGEKSPDSTSPSYSTRMDRSESGVSRAPL  
DSFTTSSNFISVSNPNAPAVPEIAHGSLTPESGTPDPASIQFFVG-NQSLNSSGSLTA  
DSFTTSTSFISVSNPNAPESLNPPEPQEAAPTST-----YFTPAA-----NKPQG  
DELASKPK-----GNNLSTE-----GSSSSAS  
-----

00:1|Ac-AAGDPLAQLQWAGGR  
01:9606|34805|0#NP\_057114|TRAPPC12|Homo\_sapiens  
01:9606|34805|NM\_016030|TRAPPC12|Homo\_sapiens  
07:10090|34805|NM\_001161410|Trappc12|Mus\_musculus  
07:10090|34805|NM\_001161411|Trappc12|Mus\_musculus  
07:10090|34805|NM\_178811|Trappc12|Mus\_musculus  
09:8364|34805|NM\_001006868|trappc12|Xenopus\_tropicalis  
10:7955|34805|NM\_001080644|trappc12|Danio\_rerio  
12:7227|34805|NM\_140998|CG11396|Drosophila\_melanogaster  
15:3702|34805|NM\_120145|AT4G39820|Arabidopsis\_thaliana

00:1|Ac-AAGDPLAQLQWAGGR  
01:9606|34805|0#NP\_057114|TRAPPC12|Homo\_sapiens  
01:9606|34805|NM\_016030|TRAPPC12|Homo\_sapiens  
07:10090|34805|NM\_001161410|Trappc12|Mus\_musculus  
07:10090|34805|NM\_001161411|Trappc12|Mus\_musculus  
07:10090|34805|NM\_178811|Trappc12|Mus\_musculus  
09:8364|34805|NM\_001006868|trappc12|Xenopus\_tropicalis  
10:7955|34805|NM\_001080644|trappc12|Danio\_rerio  
12:7227|34805|NM\_140998|CG11396|Drosophila\_melanogaster  
15:3702|34805|NM\_120145|AT4G39820|Arabidopsis\_thaliana

00:1|Ac-AAGDPLAQLQWAGGR  
01:9606|34805|0#NP\_057114|TRAPPC12|Homo\_sapiens  
01:9606|34805|NM\_016030|TRAPPC12|Homo\_sapiens  
07:10090|34805|NM\_001161410|Trappc12|Mus\_musculus  
07:10090|34805|NM\_001161411|Trappc12|Mus\_musculus  
07:10090|34805|NM\_178811|Trappc12|Mus\_musculus  
09:8364|34805|NM\_001006868|trappc12|Xenopus\_tropicalis  
10:7955|34805|NM\_001080644|trappc12|Danio\_rerio  
12:7227|34805|NM\_140998|CG11396|Drosophila\_melanogaster  
15:3702|34805|NM\_120145|AT4G39820|Arabidopsis\_thaliana

00:1|Ac-AAGDPLAQLQWAGGR  
01:9606|34805|0#NP\_057114|TRAPPC12|Homo\_sapiens  
01:9606|34805|NM\_016030|TRAPPC12|Homo\_sapiens  
07:10090|34805|NM\_001161410|Trappc12|Mus\_musculus  
07:10090|34805|NM\_001161411|Trappc12|Mus\_musculus  
07:10090|34805|NM\_178811|Trappc12|Mus\_musculus  
09:8364|34805|NM\_001006868|trappc12|Xenopus\_tropicalis  
10:7955|34805|NM\_001080644|trappc12|Danio\_rerio  
12:7227|34805|NM\_140998|CG11396|Drosophila\_melanogaster  
15:3702|34805|NM\_120145|AT4G39820|Arabidopsis\_thaliana

00:1|Ac-AAGDPLAQLQWAGGR  
01:9606|34805|0#NP\_057114|TRAPPC12|Homo\_sapiens  
01:9606|34805|NM\_016030|TRAPPC12|Homo\_sapiens  
07:10090|34805|NM\_001161410|Trappc12|Mus\_musculus  
07:10090|34805|NM\_001161411|Trappc12|Mus\_musculus  
07:10090|34805|NM\_178811|Trappc12|Mus\_musculus  
09:8364|34805|NM\_001006868|trappc12|Xenopus\_tropicalis  
10:7955|34805|NM\_001080644|trappc12|Danio\_rerio  
12:7227|34805|NM\_140998|CG11396|Drosophila\_melanogaster  
15:3702|34805|NM\_120145|AT4G39820|Arabidopsis\_thaliana

00:1|Ac-AAGDPLAQLQWAGGR  
01:9606|34805|0#NP\_057114|TRAPPC12|Homo\_sapiens  
01:9606|34805|NM\_016030|TRAPPC12|Homo\_sapiens  
07:10090|34805|NM\_001161410|Trappc12|Mus\_musculus  
07:10090|34805|NM\_001161411|Trappc12|Mus\_musculus  
07:10090|34805|NM\_178811|Trappc12|Mus\_musculus  
09:8364|34805|NM\_001006868|trappc12|Xenopus\_tropicalis  
10:7955|34805|NM\_001080644|trappc12|Danio\_rerio  
12:7227|34805|NM\_140998|CG11396|Drosophila\_melanogaster  
15:3702|34805|NM\_120145|AT4G39820|Arabidopsis\_thaliana

00:1|Ac-AAGDPLAQLQWAGGR  
01:9606|34805|0#NP\_057114|TRAPPC12|Homo\_sapiens  
01:9606|34805|NM\_016030|TRAPPC12|Homo\_sapiens  
07:10090|34805|NM\_001161410|Trappc12|Mus\_musculus  
07:10090|34805|NM\_001161411|Trappc12|Mus\_musculus  
07:10090|34805|NM\_178811|Trappc12|Mus\_musculus  
09:8364|34805|NM\_001006868|trappc12|Xenopus\_tropicalis  
10:7955|34805|NM\_001080644|trappc12|Danio\_rerio  
12:7227|34805|NM\_140998|CG11396|Drosophila\_melanogaster  
15:3702|34805|NM\_120145|AT4G39820|Arabidopsis\_thaliana

00:1|Ac-AAGDPLAQLQWAGGR

-----  
APPASPEPFAHIQAVFAGSDDPFATALSMSEMDRRNDAWLPGEATRGVLRAVATQQRGA-  
APPASPEPFAHIQAVFAGSDDPFATALSMSEMDRRNDAWLPGEATRGVLRAVATQQRGA-  
DVPESPKPFSQIQAVFAGSDDPFATALSMSEMDRRNDAWLPSQATREVLMSVATQQYGT-  
DVPESPKPFSQIQAVFAGSDDPFATALSMSEMDRRNDAWLPSQATREVLMSVATQQYGT-  
DVPESPKPFSQIQAVFAGSDDPFATALSMSEMDRRNDAWLPSQATREVLMSVATQQYGT-  
EVSQSPKPFSSQIHSVFAGSDDPFATALNMSEMDRRNDAWLP SQDTRNILISVATQKYSA-  
SPVEVSAPMNKQLQAVFSSGDDPFASALINSELDKRYDANLPSDDTRKVLISVATQQIISP-  
STSSAPNMMS---NTFVGFFQPPE---YVETPEAGEDS1KVGDDVRNLWE-----LP-  
-----NQVTSTM-----FTESSPAMPDPLPESETRPEFNPSSDSTAMA

-----  
VFVDKENLTMPLGRFDNIQGDVAVKDLMLRFLGKAAAKRQVLNADSVESQSFVGLKQLISC  
VFVDKENLTMPLGRFDNIQGDVAVKDLMLRFLGKAAAKRQVLNADSVESQSFVGLKQLISC  
VFIDKENLTMPLGKFDNIQGDVAVKDLMLRFLGKAAAKRQVLNADSVESQSFVGLKQLISC  
VFIDKENLTMPLGKFDNIQGDVAVKDLMLRFLGKAAAKRQVLNADSVESQSFVGLKQLISC  
VFIDKENLTMPLGKFDNIQGDVAVKDLMLRFLGKAAAKRQVLNADSVESQSFVGLKQLISC  
VFIDKENLTMPLGKFDNIQGDVAVKDLMLRFLGKAAAKRQVLNADSVESQSFVGLKQLISC  
VFIDKEKLTMPGLKFDNIQGDVAVRDLMLRFLGGEQAAMRRQVLTALSVETQTFVGLKKLIES  
GQIPREQLAMPGLKFDNLQGDVAVKDLMLRFLGGEQAAMKRQVLSANSVEQNFLGLKRLIST  
RENPEPKLIMPGIHLQTDLADPISVAVTQHLGEAELSRYKILRVDDVTQDERGLRTLHA  
ESTDAGEP--TAFELASSQVTSVAD-----LPPERFNSLDELTHDLGSLHELSTR

-----  
RNNWRAAVDLCGRLLTAHQGGYGGKSGLLTSHTTDSLQLWVRLALLVKLGFLQNAEMEFEP  
RNNWRAAVDLCGRLLTAHQGGYGGKSGLLTSHTTDSLQLWVRLALLVKLGFLQNAEMEFEP  
RNNWRAAVDLCGRLLTAHQGGYGGKNGLPSTHTTDSLQLWVRLALLVKLGFLQNAEMEFEP  
RNNWRAAVDLCGRLLTAHQGGYGGKNGLPSTHTTDSLQLWVRLALLVKLGFLQNAEMEFEP  
RNNWRAAVDLCGRLLTAHQGGYGGKNGLPSTHTTDSLQLWVRLALLVKLGFLQNAEMEFEP  
KNWRAAVDLCGRLLTAHQGGYGGKSGQPTNHTTDSLQLWVRLSLLVKLGFLQNAEMEFEP  
KNWRAAVDLCGRLLTAHQGGYGGKSGQHTTHTTDSLQLWVRLSLLMKLSFLQNAELELEP  
GCYRTAVNLTGRLLTIYGGYGRSGQPAKHSPHSLQLWFTRLALLAKLGEFELLNAEAP  
GSWQATLEKISQARALF-----LLTKPHEHLTYLTYQVMALAKLRRSDEASHELNS

-----  
FGNLDQPDLYEYYPHYVPGRRGSMVPPFSMRILHAELQQYLGPNQESLDRLHKVKTVCSSK  
FGNLDQPDLYEYYPHYVPGRRGSMVPPFSMRILHAELQQYLGPNQESLDRLHKVKTVCSSK  
FGNLDQPDLYEYYPHYVPGRRGSMVPPFSMRILHAELQQYLGPNQESLDRLHRVKTVCSSK  
FGNLDQPDLYEYYPHYVPGRRGSMVPPFSMRILHAELQQYLGPNQESLDRLHRVKTVCSSK  
FGNLDQPDLYEYYPHYVPGRRGSMVPPFSMRILHAELQQYLGPNQESLDRLHRVKTVCSSK  
FKNLDQPDLYEYYPHYVPGRRGSMVPPFSMRILHAELRQYLGPNQESLDRLHNMKAVCLQ  
FGDLDPNLYEYYPPIYVPGRRGSMVPPFSMRLLHAELPQYLQKQPQETLDRLHRIKSVQCK  
FQQLTSPDVFYDFPYEMYNKGSGSIACFSFRLLLAELPIYLGKPHVALDRLSLHVTTRE  
LHDFDGTHTYRYESFPEIYPNRRGSMVPPFSRLWLYALIPTKLGNRQEGLDRLYVLLDFVRD

-----  
ILANLEQGLAEDGGMSSVTQEGRQASIRLWRSRLGRVMSMANCLLLMKDYVLAVEAYHS  
ILANLEQGLAEDGGMSSVTQEGRQASIRLWRSRLGRVMSMANCLLLMKDYVLAVEAYHS  
ILANLEQGLAEDGGLSVTTQESRQASVQLWRSRLGRVLSMANCLLLMKDYVLAVDAYLT  
HMHPLRLV-----  
ILANLEQGLAEDGGLSSVTQESRQASVQLWRSRLGRVLSMANCLLLMKDYVLAVDAYLT  
ILDNLQGLAEDGSLITISPNRQASVQLWRSRLGRVMSMANCLLLMKDYVLAVDAYQT  
ILSNLQGLAEDGSMVNLTQENRLASLELWRSRLSRLMSMANCLLLMKDYVLAVETYS  
IKEHY-----LSLHNKAAEEFWQRRRCERVLSHSI INCGLMKKF5MIDDIMEG  
RIREK-----ESQSLESSVELWKKRETFVMNCLLGFHLGHKEFGVSLDLMEK

-----  
V----IKYYPEQEPQLLSGIGRISLQIGDIKTAEKYFQDVEKVTQKL-----DGLQGKI  
V----IKYYPEQEPQLLSGIGRISLQIGDIKTAEKYFQDVEKVTQKL-----DGLQGKI  
V----IKYYPEQEPQLLSGIGRILLQIGDIKTAEKYFQDVEKVTQKL-----DGLQGKI  
V----IKYYPEQEPQLLSGIGRILLQIGDIKTAEKYFQDVEKVTQKL-----DGLQGKI  
V----IRYYPEQEPQLLSGIGRIFLQIGDIKTAEKYFQDAETVIQKSP---TSNEPQNM  
I-----IEFEPEQEPQVVLGSGIGRIFLQIGDIRTAEKYFQDVENACQSKG---KTATBET  
TLLKRSNLSKEDRRSLYSAWGRIYLQIGDIFGAEQKIAVSRRRLREI-----NSAPDL  
L----INR-DPLDPVLISKLSGVQMFGDVEGAKTTFDRVEKMLNEGKSNGLLNEIQFNN

-----  
MVLMNSAFLHLGQNNFAEAHRFFTEILRMDPRNAVANNNAAVCLLYLGKLDKDSLRQLEAM  
MVLMNSAFLHLGQNNFAEAHRFFTEILRMDPRNAVANNNAAVCLLYLGKLDKDSLRQLEAM  
MVLMNRAFLYLGQNNFAEAHKFFTEILRMDPTNAVANNNAAVCLLYLGKLDKDSLRQLEAM  
MVLMNRAFLYLGQNNFAEAHKFFTEILRMDPTNAVANNNAAVCLLYLGKLDKDSLRQLEAM  
IVLMNRAFLHLGQNNFAEAHKFFSEVLKLDPANAVANNNAAVCLLYLGKLDKDSLRHLEGL  
SVLMNRAFVYLSQNNYADAHTCFSSVRLDPKNPVANNNAAVCLLYLGRLESKLGQLES  
LDLVDRGLIAVAKNDFPEAYVIFQKALHLDTGNTMILNMGVCLLYAGKLDKANLRYERA  
LVGRNKALVYVAKDYVSAVREYDKCIERDNSDI1AVNNKALCLMYLRDLSDAIVMESA

-----

01:9606|34805|0#NP\_057114|TRAPPC12|Homo\_sapiens  
01:9606|34805|NM\_016030|TRAPPC12|Homo\_sapiens  
07:10090|34805|NM\_001161410|Trappc12|Mus\_musculus  
07:10090|34805|NM\_001161411|Trappc12|Mus\_musculus  
07:10090|34805|NM\_178811|Trappc12|Mus\_musculus  
09:8364|34805|NM\_001006868|trappc12|Xenopus\_tropicalis  
10:7955|34805|NM\_001080644|trappc12|Danio\_rerio  
12:7227|34805|NM\_140998|CG11396|Drosophila\_melanogaster  
15:3702|34805|NM\_120145|AT4G39820|Arabidopsis\_thaliana

VQQDPRHYLHESVLFNLTMYELESSRSMQKKQALLEAVAGKEGDS--FNTQCLKLA---  
VQQDPRHYLHESVLFNLTMYELESSRSMQKKQALLEAVAGKEGDS--FNTQCLKLA---  
VQQDPRHYLHESVLFNLTMYELESSRSMQKKQSLEAVASKEGDS--FNTQCLKLA---  
-----  
VQQDPRHYLHESVLFNLTMYELESSRSMQKKQSLEAVASKEGDS--FNTQCLKLA---  
VQQDPKHLYLHESVLFNLTMYELESSRSMQKKQALLEAVAVKEGDS--FNTQCLKLL---  
VHKDPALYLHESVLFNLTMYELESSRSTQKKQALLEAAACREGDS--FNIQCLKLV---  
INLNPQKSLNESLLVNLSTLYELESNNSKAKKYNLLRLINRYKPDNLNISIICLKLQTIN  
LERVPTAALNESLVVNLCSMYELAYVNHVDVVRTLNWNIARVAPDD--FDSSCTRV----

*VAT1*

Ac-MHSPSSCALSSGVPAMSDER

CLUSTAL O(1.2.1) multiple sequence alignment

|                                                    |                                                                |
|----------------------------------------------------|----------------------------------------------------------------|
| 00:1 Ac-MHSPSSCALSSGVPAMSDER                       | -----MHSPSSCALSSGVPAMSDER-----                                 |
| 01:9606 36200 0#NP_006364 VAT1 Homo_sapiens        | -----MSDEREVAEA-----                                           |
| 01:9606 36200 NM_006373 VAT1 Homo_sapiens          | LARRPAPPAGSRSRGSSRRVPPSPAVHSPSSCALSSGVPAMSDEREVAEA-----        |
| 02:9598 36200 NM_001280091 VAT1 Pan_troglodytes    | -----VPPSPAVHSTSSCALSSGVPAMSSEREVAEA-----                      |
| 04:9913 36200 NM_001192265 VAT1 Bos_taurus         | -----RAPSPAVHSQSSCAPTSRVSAMSAEREVAEAATVVAABE--                 |
| 06:10116 36200 NM_001033683 Vat1 Rattus_norvegicus | -----HVGSLAMSAEREATEAATVAAAABEAR                               |
| 07:10090 36200 NM_012037 Vat1 Mus_musculus         | -----VSRPSQLCTGVSQGLGTHVASLAMSAEREAAEAATVAAATEAG               |
| 10:7955 36200 NM_001007051 vat1 Danio_rerio        | -----PHL-SE-AGKQTQ-----VFSLQK-FSSTQPTMTSGEDAPAQQ-----QN        |
|                                                    | ***                                                            |
| 00:1 Ac-MHSPSSCALSSGVPAMSDER                       | -----                                                          |
| 01:9606 36200 0#NP_006364 VAT1 Homo_sapiens        | -----ATGEDASSPPPKTEAASDPQHP-----AASEGAAAAAASPPLLR              |
| 01:9606 36200 NM_006373 VAT1 Homo_sapiens          | -----ATGEDASSPPPKTEAASDPQHP-----AASEGAAAAAASPPLLR              |
| 02:9598 36200 NM_001280091 VAT1 Pan_troglodytes    | -----ATGEDASSPPPKTEAASDPQHP-----AASEGAAATAASPPLLR              |
| 04:9913 36200 NM_001192265 VAT1 Bos_taurus         | -----AGAGEDASSQPPKAEASDAQPS-----AASEGPAAPSPPPPLLR              |
| 06:10116 36200 NM_001033683 Vat1 Rattus_norvegicus | AE--TGAGEGAPSQPPTVEVASDPQPP-----PAPEASAS--ASAPPLR              |
| 07:10090 36200 NM_012037 Vat1 Mus_musculus         | AETGTGAGEGAPSQPPTVEVASDPQPP-----PAPEASAS--ASAPPLR              |
| 10:7955 36200 NM_001007051 vat1 Danio_rerio        | AEEQKQQETKTPAESPKTESKPDPPPTSASTEAAATAAAAADTPAPAAEKAPEEDTFTYR   |
| 00:1 Ac-MHSPSSCALSSGVPAMSDER                       | -----                                                          |
| 01:9606 36200 0#NP_006364 VAT1 Homo_sapiens        | CLVLTGFGGYYDKVKLQSRPAAPPAPGPGQLTLRLRACGLNFADLMARQGLYDRLPPLPVT  |
| 01:9606 36200 NM_006373 VAT1 Homo_sapiens          | CLVLTGFGGYYDKVKLQSRPAAPPAPGPGQLTLRLRACGLNFADLMARQGLYDRLPPLPVT  |
| 02:9598 36200 NM_001280091 VAT1 Pan_troglodytes    | CLVLTGFGGYYDKVKLQSRPAAPPAPGPGQLTLRLRACGLNFADLMARQGLYDRLPPLPVT  |
| 04:9913 36200 NM_001192265 VAT1 Bos_taurus         | CLVLTGFGGYYDKVKLQTRPAAPPAPGTGQLTLRVKACGLNFADLMARQGLYDRLPQLPVT  |
| 06:10116 36200 NM_001033683 Vat1 Rattus_norvegicus | CLVLTGFGGYYDKVKLQSRPAVPPAPGPGQVTLRVACGLNFADLMGRQGLYDRLPPLPVT   |
| 07:10090 36200 NM_012037 Vat1 Mus_musculus         | CLVLTGFGGYYDKVKLQSRPAVPPAPGPGQLTLRVACGLNFADLMGRQGLYDRLPPLPVT   |
| 10:7955 36200 NM_001007051 vat1 Danio_rerio        | ALVLTGYGYYDKVKLQVKKGK-PALKSGEVMVRVKMCGLNFAADLMARQGLYDRLPSPPPVT |
| 00:1 Ac-MHSPSSCALSSGVPAMSDER                       | -----                                                          |
| 01:9606 36200 0#NP_006364 VAT1 Homo_sapiens        | PGMEGAGVVIIVGEGVSDRKAGDRVMVLNRSGMWQEEVTVPSVQTFLLIPEAMTFEEAAAL  |
| 01:9606 36200 NM_006373 VAT1 Homo_sapiens          | PGMEGAGVVIIVGEGVSDRKAGDRVMVLNRSGMWQEEVTVPSVQTFLLIPEAMTFEEAAAL  |
| 02:9598 36200 NM_001280091 VAT1 Pan_troglodytes    | PGMGAGVVIIVGEGVSDRKAGDRVMVLNRSGMWQEEVTVPSVQTFLLMPEAMTFEEAAAL   |
| 04:9913 36200 NM_001192265 VAT1 Bos_taurus         | PGMEGAGVVIIVGEGVSDRKAGDRVMVLNRSGMWQEEVTVPSAQTFLLMPEAMTFEEAAAL  |
| 06:10116 36200 NM_001033683 Vat1 Rattus_norvegicus | PGMEGAGVVVAVGEGVSDRKAGDRVMVLNRSGMWQEEVTVPSAQTFLLMPEAMTFEEAAAL  |
| 07:10090 36200 NM_012037 Vat1 Mus_musculus         | PGMEGAGVVVAVGEGVSDRKAGDRVMVLNRSGMWQEEVTVPSAQTFLLMPEAMTFEEAAAL  |
| 10:7955 36200 NM_001007051 vat1 Danio_rerio        | PGMESSGVIEAVGEEVTVDRKVGDKVLVLNRSGMWQEEVVVVASTHTFLMPEGMSFEEAAAL |
| 00:1 Ac-MHSPSSCALSSGVPAMSDER                       | -----                                                          |
| 01:9606 36200 0#NP_006364 VAT1 Homo_sapiens        | LVNYITAYMVLFDGFLNLPQGHSVLVHMAAGGVGMAAVQLCRTVENVTVFGTASASKHEAL  |
| 01:9606 36200 NM_006373 VAT1 Homo_sapiens          | LVNYITAYMVLFDGFLNLPQGHSVLVHMAAGGVGMAAVQLCRTVENVTVFGTASASKHEAL  |
| 02:9598 36200 NM_001280091 VAT1 Pan_troglodytes    | LVNYITAYMVLFDGFLNLRPGHSVLVHMAAGGVGMAAVQLCRTVENVTVFGTASASKHEAL  |
| 04:9913 36200 NM_001192265 VAT1 Bos_taurus         | LVNYITAYMVLFDGFLNLRPGHSVLVHMAAGGVGMAALQLCRTVENVTVFGTASASKHEVL  |
| 06:10116 36200 NM_001033683 Vat1 Rattus_norvegicus | LVNYITAYMVLFDGFLNLRPGHSVLVHMAAGGVGMAALQLCRTVENVTVFGTASASKHEVL  |
| 07:10090 36200 NM_012037 Vat1 Mus_musculus         | LVNYITAYMVLFDGFLNLRPGHSVLVHMAAGGVGMAALQLCRTVENVTVFGTASASKHEVL  |
| 10:7955 36200 NM_001007051 vat1 Danio_rerio        | PVNYITAYMMLFDGFLHLPNQSVLVHMAAGGVGIAATQLCKTVNDVTVFGTASASKHEVI   |
| 00:1 Ac-MHSPSSCALSSGVPAMSDER                       | -----                                                          |
| 01:9606 36200 0#NP_006364 VAT1 Homo_sapiens        | KENGVTHPIDYHTTDDYVDEIKKISPKGVDIVMDPLGGSDTAKGYNLLKPMGKVVTYGMAN  |
| 01:9606 36200 NM_006373 VAT1 Homo_sapiens          | KENGVTHPIDYHTTDDYVDEIKKISPKGVDIVMDPLGGSDTAKGYNLLKPMGKVVTYGMAN  |
| 02:9598 36200 NM_001280091 VAT1 Pan_troglodytes    | KENGVTHPIDYHTTDDYVDEIKKISPKGVDIVMDPLGGSDTAKGYNLLKPMGKVVTYGMAN  |
| 04:9913 36200 NM_001192265 VAT1 Bos_taurus         | KENGVTHPIDYHTTDDYVDEIKKISPKGVDIVMDPLGGSDTAKGYNLLKPMGKVVTYGMAN  |
| 06:10116 36200 NM_001033683 Vat1 Rattus_norvegicus | KENGVTHPIDYHTTDDYVDEIKKISPKGVDIVMDPLGGSDTAKGYHLLKPMGKVVTYGMAN  |
| 07:10090 36200 NM_012037 Vat1 Mus_musculus         | KENGVTHPIDYHTTDDYVDEIKKISPKGVDIVMDPLGGSDTAKGYHLLKPMGKVVTYGMAN  |
| 10:7955 36200 NM_001007051 vat1 Danio_rerio        | SQGGVTHPIDYRTRDYVEEVRKISPKGLDIVDPLGGSDTAKGYNLLKPMGKILISYGAAN   |
| 00:1 Ac-MHSPSSCALSSGVPAMSDER                       | -----                                                          |
| 01:9606 36200 0#NP_006364 VAT1 Homo_sapiens        | LLTGPKRNLMLALARTWWNQFSVTALQLLQANRAVCGFHLGYLDGEVELVSGVVARLLALY  |
| 01:9606 36200 NM_006373 VAT1 Homo_sapiens          | LLTGPKRNLMLALARTWWNQFSVTALQLLQANRAVCGFHLGYLDGEVELVSGVVARLLALY  |
| 02:9598 36200 NM_001280091 VAT1 Pan_troglodytes    | LLTGPKRNLMLALARTWWNQFSVTALQLLQANRAVCGFHLGYLDGEVELVSGVVARLLALY  |
| 04:9913 36200 NM_001192265 VAT1 Bos_taurus         | LLTGPKRNLMLALARTWWNQFSVTALQLLQANRAVCGFHLGYLEGEVELVSGVVTRLLALY  |
| 06:10116 36200 NM_001033683 Vat1 Rattus_norvegicus | LLTGPKRNLMLAMARTWWNQFSVTALQLLQANRAVCGFHLGYLDGEVELVSRVVTLLALY   |
| 07:10090 36200 NM_012037 Vat1 Mus_musculus         | LLTGPKRNLMLAMARTWWNQFSVTALQLLQANRAVCGFHLGYLDGEVELVNSVVTRLVALY  |
| 10:7955 36200 NM_001007051 vat1 Danio_rerio        | MLAGQKKNLFAVAKTWYQQFSVHTLSLIQGNRSVCGFHLGYLDSETELIDQAMTAVMDLY   |
| 00:1 Ac-MHSPSSCALSSGVPAMSDER                       | -----                                                          |
| 01:9606 36200 0#NP_006364 VAT1 Homo_sapiens        | NQGHKPHIDSVPWPFKEKVADAMKMQEKKNVGKVLLVPGPEKEN-----              |
| 01:9606 36200 NM_006373 VAT1 Homo_sapiens          | NQGHKPHIDSVPWPFKEKVADAMKMQEKKNVGKVLLVPGPEKEN-----              |
| 02:9598 36200 NM_001280091 VAT1 Pan_troglodytes    | NQGHIRPHIDSVPWPFKEKVADAMKMQEKKNVGKVLLVPGPEKEN-----             |
| 04:9913 36200 NM_001192265 VAT1 Bos_taurus         | NQGHKPRIDSVPWPFKEKVADAMRQMKEKKNVGKVLLVPGPEKEN-----             |
| 06:10116 36200 NM_001033683 Vat1 Rattus_norvegicus | NQGHKPRIDSVPWPFKEKVADAMRQMKEKKNIGKVLLVPGPEKET-----             |
| 07:10090 36200 NM_012037 Vat1 Mus_musculus         | NQGHKPRIDSVPWPFKEKVADAMKMQEKKNIGKVLLVPGPEKET-----              |
| 10:7955 36200 NM_001007051 vat1 Danio_rerio        | RQGKVKPRIDSTYHLEQVGDAMRRMQERNNIGKIILTTEPMKEEKEEAKKDEEKDDK      |
| 00:1 Ac-MHSPSSCALSSGVPAMSDER                       | -----                                                          |
| 01:9606 36200 0#NP_006364 VAT1 Homo_sapiens        | -----                                                          |
| 01:9606 36200 NM_006373 VAT1 Homo_sapiens          | -----                                                          |

|          |  |       |  |              |  |      |  |                   |                                                      |
|----------|--|-------|--|--------------|--|------|--|-------------------|------------------------------------------------------|
| 02:9598  |  | 36200 |  | NM_001280091 |  | VAT1 |  | Pan_troglodytes   | -----                                                |
| 04:9913  |  | 36200 |  | NM_001192265 |  | VAT1 |  | Bos_taurus        | -----                                                |
| 06:10116 |  | 36200 |  | NM_001033683 |  | Vat1 |  | Rattus_norvegicus | -----                                                |
| 07:10090 |  | 36200 |  | NM_012037    |  | Vat1 |  | Mus_musculus      | -----                                                |
| 10:7955  |  | 36200 |  | NM_001007051 |  | vat1 |  | Danio_rerio       | KKDDKKKDDKKKEDKKKDEAKKEKKDEKKKEEAKKDDKKAEEKKEEVKKEEN |

# *GDI1*

Ac-AAA VAAATAAVKEEEEPSGR

Ac-AAATAAVKEEEEPSGR

Ac-AAAVAAATAAVKEEEEPSGR

Ac-AATAAVKEEEEPSGR

CLUSTAL O(1.2.1) multiple sequence alignment

```
00:1|Ac-AAAATAAATAAVKEEEPSGR
00:2|Ac-AAATAAVKEEEPSGR
00:3|Ac-AAATAAATAAVKEEEPSGR
00:4|Ac-AAATAAVKEEEPSGR
01:9606|37487|0#NP_001484|GDI1|Homo_sapiens
01:9606|37487|NM_001493|GDI1|Homo_sapiens
02:9598|37487|NM_001009061|GDI1|Pan_troglodytes
04:9913|37487|NM_174064|GDI1|Bos_taurus
05:9615|37487|NM_001003185|GDI1|Canis_lupus_familiaris
06:10116|37487|NM_017088|Gdi1|Rattus_norvegicus
07:10090|37487|NM_010273|Gdi1|Mus_musculus
10:7955|37487|NM_001020608|gdi1|Danio_rerio
12:7227|37487|NM_001259024|Gdi|Drosophila_melanogaster
12:7227|37487|NM_001298852|Gdi|Drosophila_melanogaster
12:7227|37487|NM_078800|Gdi|Drosophila_melanogaster
13:6239|37487|NM_001047578|gdi-1|Caenorhabditis_elegans
13:6239|37487|NM_001047579|gdi-1|Caenorhabditis_elegans
13:6239|37487|NM_001268907|gdi-1|Caenorhabditis_elegans
15:3702|37487|NM_001084585|GDI1|Arabidopsis_thaliana
15:3702|37487|NM_115855|GDI2|Arabidopsis_thaliana
15:3702|37487|NM_129973|GDI1|Arabidopsis_thaliana
```

```
00:1|Ac-AAAATAAATAAVKEEEPSGR
00:2|Ac-AAATAAVKEEEPSGR
00:3|Ac-AAATAAATAAVKEEEPSGR
00:4|Ac-AAATAAVKEEEPSGR
01:9606|37487|0#NP_001484|GDI1|Homo_sapiens
01:9606|37487|NM_001493|GDI1|Homo_sapiens
02:9598|37487|NM_001009061|GDI1|Pan_troglodytes
04:9913|37487|NM_174064|GDI1|Bos_taurus
05:9615|37487|NM_001003185|GDI1|Canis_lupus_familiaris
06:10116|37487|NM_017088|Gdi1|Rattus_norvegicus
07:10090|37487|NM_010273|Gdi1|Mus_musculus
10:7955|37487|NM_001020608|gdi1|Danio_rerio
12:7227|37487|NM_001259024|Gdi|Drosophila_melanogaster
12:7227|37487|NM_001298852|Gdi|Drosophila_melanogaster
12:7227|37487|NM_078800|Gdi|Drosophila_melanogaster
13:6239|37487|NM_001047578|gdi-1|Caenorhabditis_elegans
13:6239|37487|NM_001047579|gdi-1|Caenorhabditis_elegans
13:6239|37487|NM_001268907|gdi-1|Caenorhabditis_elegans
15:3702|37487|NM_001084585|GDI1|Arabidopsis_thaliana
15:3702|37487|NM_115855|GDI2|Arabidopsis_thaliana
15:3702|37487|NM_129973|GDI1|Arabidopsis_thaliana
```

```
00:1|Ac-AAAATAAATAAVKEEEPSGR
00:2|Ac-AAATAAVKEEEPSGR
00:3|Ac-AAATAAATAAVKEEEPSGR
00:4|Ac-AAATAAVKEEEPSGR
01:9606|37487|0#NP_001484|GDI1|Homo_sapiens
01:9606|37487|NM_001493|GDI1|Homo_sapiens
02:9598|37487|NM_001009061|GDI1|Pan_troglodytes
04:9913|37487|NM_174064|GDI1|Bos_taurus
05:9615|37487|NM_001003185|GDI1|Canis_lupus_familiaris
06:10116|37487|NM_017088|Gdi1|Rattus_norvegicus
07:10090|37487|NM_010273|Gdi1|Mus_musculus
10:7955|37487|NM_001020608|gdi1|Danio_rerio
12:7227|37487|NM_001259024|Gdi|Drosophila_melanogaster
12:7227|37487|NM_001298852|Gdi|Drosophila_melanogaster
12:7227|37487|NM_078800|Gdi|Drosophila_melanogaster
13:6239|37487|NM_001047578|gdi-1|Caenorhabditis_elegans
13:6239|37487|NM_001047579|gdi-1|Caenorhabditis_elegans
13:6239|37487|NM_001268907|gdi-1|Caenorhabditis_elegans
15:3702|37487|NM_001084585|GDI1|Arabidopsis_thaliana
15:3702|37487|NM_115855|GDI2|Arabidopsis_thaliana
15:3702|37487|NM_129973|GDI1|Arabidopsis_thaliana
```

```
00:1|Ac-AAAATAAATAAVKEEEPSGR
00:2|Ac-AAATAAVKEEEPSGR
00:3|Ac-AAATAAATAAVKEEEPSGR
00:4|Ac-AAATAAVKEEEPSGR
01:9606|37487|0#NP_001484|GDI1|Homo_sapiens
01:9606|37487|NM_001493|GDI1|Homo_sapiens
02:9598|37487|NM_001009061|GDI1|Pan_troglodytes
04:9913|37487|NM_174064|GDI1|Bos_taurus
05:9615|37487|NM_001003185|GDI1|Canis_lupus_familiaris
06:10116|37487|NM_017088|Gdi1|Rattus_norvegicus
07:10090|37487|NM_010273|Gdi1|Mus_musculus
10:7955|37487|NM_001020608|gdi1|Danio_rerio
12:7227|37487|NM_001259024|Gdi|Drosophila_melanogaster
12:7227|37487|NM_001298852|Gdi|Drosophila_melanogaster
```

|         |       |              |                              |                                                              |
|---------|-------|--------------|------------------------------|--------------------------------------------------------------|
| 12:7227 | 37487 | NM_078800    | Gdi Drosophila_melanogaster  | ELFQRYGL--EPPGERFGRGRDWNVDLIPKFLMANGQLVKLLIHTGVTRYLEFKSIEGSY |
| 13:6239 | 37487 | NM_001047578 | gdi-1 Caenorhabditis_elegans | QLYEKFHGPAKQPQEMGRGRDWNVDLIPKFLMANGPLVKLLIHTGVTRYLEFKSIEASF  |
| 13:6239 | 37487 | NM_001047579 | gdi-1 Caenorhabditis_elegans | QLYEKFHGPAKQPQEMGRGRDWNVDLIPKFLMANGPLVKLLIHTGVTRYLEFKSIEASF  |
| 13:6239 | 37487 | NM_001268907 | gdi-1 Caenorhabditis_elegans |                                                              |
| 15:3702 | 37487 | NM_001084585 | GDI1 Arabidopsis_thaliana    | QLWKKFRGEEK-APAHLGSSRDYNVDMMPKFMANGKLVRLIHTDVTKYLSFKAVDGSY   |
| 15:3702 | 37487 | NM_115855    | GDI2 Arabidopsis_thaliana    | QLWKKFRGEEK-APEHLGASRDYNVDMMPKFMNGKLVRTLHTDVTKYLSFKAVDGSY    |
| 15:3702 | 37487 | NM_129973    | GDI1 Arabidopsis_thaliana    | QLWKKFRGEEK-APAHLGSSRDYNVDMMPKFMANGKLVRLIHTDVTKYLSFKAVDGSY   |

|          |                     |                                           |                                                               |
|----------|---------------------|-------------------------------------------|---------------------------------------------------------------|
| 00:1     | Ac-AAA              | AAAAATAAVKEEEEPSGR                        | -----                                                         |
| 00:2     | Ac-AAATAAVKEEEEPSGR | -----                                     |                                                               |
| 00:3     | Ac-AAA              | AAAAATAAVKEEEEPSGR                        | -----                                                         |
| 00:4     | Ac-AATAAVKEEEEPSGR  | -----                                     |                                                               |
| 01:9606  | 37487               | 0#NP_001484 GDI1 Homo_sapiens             | VYKGGKIYKVPSTETETALASNLGMFEKRRFRKFLVVFVANFDENDPKTFEGVDPQTTSMR |
| 01:9606  | 37487               | NM_001493 GDI1 Homo_sapiens               | VYKGGKIYKVPSTETETALASNLGMFEKRRFRKFLVVFVANFDENDPKTFEGVDPQTTSMR |
| 02:9598  | 37487               | NM_001009061 GDI1 Pan_troglodytes         | VYKGGKIYKVPSTETETALASNLGMFEKRRFRKFLVVFVANFDENDPKTFEGVDPQTTSMR |
| 04:9913  | 37487               | NM_174064 GDI1 Bos_taurus                 | VYKGGKIYKVPSTETETALASNLGMFEKRRFRKFLVVFVANFDENDPKTFEGVDPQTTSMR |
| 05:9615  | 37487               | NM_001003185 GDI1 Canis_lupus_familiaris  | IYKGGKIYKVPSTETETALASNLGMFEKRRFRKFLVVFVANFDENDPKTFEGVDPQSTSMR |
| 06:10116 | 37487               | NM_017088 Gdi1 Rattus_norvegicus          | VYKGGKIYKVPSTETETALASNLGMFEKRRFRKFLVVFVANFDENDPKTFEGVDPQTTSMR |
| 07:10090 | 37487               | NM_010273 Gdi1 Mus_musculus               | VYKGGKIYKVPSTETETALASNLGMFEKRRFRKFLVVFVANFDENDPKTFEGVDPQTTSMR |
| 10:7955  | 37487               | NM_001020608 gdi1 Danio_rerio             | VYKGGKIYKVPSTETETALASNLGMFEKRRFRKFLVVFVANFDENDPKTFEGVDPKLTMTG |
| 12:7227  | 37487               | NM_001259024 Gdi Drosophila_melanogaster  | VYKGGKIYKVPSTETETALASNLGMFEKRRFRNFLIYVQDFREDDPKTWKDFDPTKANMQ  |
| 12:7227  | 37487               | NM_001298852 Gdi Drosophila_melanogaster  | VYKGGKIYKVPSTETETALASNLGMFEKRRFRKFLVVFVANFDENDPKTFEGVDPQNTSMR |
| 12:7227  | 37487               | NM_078800 Gdi Drosophila_melanogaster     | VYKGGKIYKVPSTETETALASNLGMFEKRRFRNFLIYVQDFREDDPKTWKDFDPTKANMQ  |
| 13:6239  | 37487               | NM_001047578 gdi-1 Caenorhabditis_elegans | VYKGGKIYKVPSTETETALASNLGMFEKRRFRNFLIYVQDFREDDPKTWKDFDPTKANMQ  |
| 13:6239  | 37487               | NM_001047579 gdi-1 Caenorhabditis_elegans | VYKGGKIYKVPSTETETALASNLGMFEKRRFRNFLIYVQDFREDDPKTWKDFDPTKANMQ  |
| 13:6239  | 37487               | NM_001268907 gdi-1 Caenorhabditis_elegans | VYKGGKIYKVPSTETETALASNLGMFEKRRFRNFLIYVQDFREDDPKTWKDFDPTKANMQ  |
| 15:3702  | 37487               | NM_001084585 GDI1 Arabidopsis_thaliana    | VYKGGKIYKVPSTETETALASNLGMFEKRRFRNFLIYVQDFREDDPKTWKDFDPTKANMQ  |
| 15:3702  | 37487               | NM_115855 GDI2 Arabidopsis_thaliana       | VYKGGKIYKVPSTETETALASNLGMFEKRRFRNFLIYVQDFREDDPKTWKDFDPTKANMQ  |
| 15:3702  | 37487               | NM_129973 GDI1 Arabidopsis_thaliana       | VYKGGKIYKVPSTETETALASNLGMFEKRRFRNFLIYVQDFREDDPKTWKDFDPTKANMQ  |

|          |                     |                                           |                                                              |
|----------|---------------------|-------------------------------------------|--------------------------------------------------------------|
| 00:1     | Ac-AAA              | AAAAATAAVKEEEEPSGR                        | -----                                                        |
| 00:2     | Ac-AAATAAVKEEEEPSGR | -----                                     |                                                              |
| 00:3     | Ac-AAA              | AAAAATAAVKEEEEPSGR                        | -----                                                        |
| 00:4     | Ac-AATAAVKEEEEPSGR  | -----                                     |                                                              |
| 01:9606  | 37487               | 0#NP_001484 GDI1 Homo_sapiens             | DVYRKFDLGQDVIDFTGHALALYRTDDYLDQPCLETVNRIKLYSESLARY-GKSPYLYPL |
| 01:9606  | 37487               | NM_001493 GDI1 Homo_sapiens               | DVYRKFDLGQDVIDFTGHALALYRTDDYLDQPCLETVNRIKLYSESLARY-GKSPYLYPL |
| 02:9598  | 37487               | NM_001009061 GDI1 Pan_troglodytes         | DVYRKFDLGQDVIDFTGHALALYRTDDYLDQPCLETVNRIKLYSESLARY-GKSPYLYPL |
| 04:9913  | 37487               | NM_174064 GDI1 Bos_taurus                 | DVYRKFDLGQDVIDFTGHALALYRTDDYLDQPCLETVNRIKLYSESLARY-GKSPYLYPL |
| 05:9615  | 37487               | NM_001003185 GDI1 Canis_lupus_familiaris  | DVYRKFDLGQDVIDFTGHALALYRTDDYLDQPCLETINRIKLYSESLARY-GKSPYLYPL |
| 06:10116 | 37487               | NM_017088 Gdi1 Rattus_norvegicus          | DVYRKFDLGQDVIDFTGHALALYRTDDYLDQPCLETINRIKLYSESLARY-GKSPYLYPL |
| 07:10090 | 37487               | NM_010273 Gdi1 Mus_musculus               | DVYRKFDLGQDVIDFTGHALALYRTDDYLDQPCLETINRIKLYSESLARY-GKSPYLYPL |
| 10:7955  | 37487               | NM_001020608 gdi1 Danio_rerio             | DVYRKFDLGQDVIDFTGHALALYRTDDYLDQPCLETINRIKLYSESLARY-GKSPYLYPL |
| 12:7227  | 37487               | NM_001259024 Gdi Drosophila_melanogaster  | DVYRKFDLGQDVIDFTGHALALYRTDDYLDQPCLETINRIKLYSESLARY-GKSPYLYPL |
| 12:7227  | 37487               | NM_001298852 Gdi Drosophila_melanogaster  | DVYRKFDLGQDVIDFTGHALALYRTDDYLDQPCLETINRIKLYSESLARY-GKSPYLYPL |
| 12:7227  | 37487               | NM_078800 Gdi Drosophila_melanogaster     | DVYRKFDLGQDVIDFTGHALALYRTDDYLDQPCLETINRIKLYSESLARY-GKSPYLYPL |
| 13:6239  | 37487               | NM_001047578 gdi-1 Caenorhabditis_elegans | DVYRKFDLGQDVIDFTGHALALYRTDDYLDQPCLETINRIKLYSESLARY-GKSPYLYPL |
| 13:6239  | 37487               | NM_001047579 gdi-1 Caenorhabditis_elegans | DVYRKFDLGQDVIDFTGHALALYRTDDYLDQPCLETINRIKLYSESLARY-GKSPYLYPL |
| 13:6239  | 37487               | NM_001268907 gdi-1 Caenorhabditis_elegans | DVYRKFDLGQDVIDFTGHALALYRTDDYLDQPCLETINRIKLYSESLARY-GKSPYLYPL |
| 15:3702  | 37487               | NM_001084585 GDI1 Arabidopsis_thaliana    | DVYRKFDLGQDVIDFTGHALALYRTDDYLDQPCLETINRIKLYSESLARY-GKSPYLYPL |
| 15:3702  | 37487               | NM_115855 GDI2 Arabidopsis_thaliana       | DVYRKFDLGQDVIDFTGHALALYRTDDYLDQPCLETINRIKLYSESLARY-GKSPYLYPL |
| 15:3702  | 37487               | NM_129973 GDI1 Arabidopsis_thaliana       | DVYRKFDLGQDVIDFTGHALALYRTDDYLDQPCLETINRIKLYSESLARY-GKSPYLYPL |

|          |                     |                                           |                                                            |
|----------|---------------------|-------------------------------------------|------------------------------------------------------------|
| 00:1     | Ac-AAA              | AAAAATAAVKEEEEPSGR                        | -----                                                      |
| 00:2     | Ac-AAATAAVKEEEEPSGR | -----                                     |                                                            |
| 00:3     | Ac-AAA              | AAAAATAAVKEEEEPSGR                        | -----                                                      |
| 00:4     | Ac-AATAAVKEEEEPSGR  | -----                                     |                                                            |
| 01:9606  | 37487               | 0#NP_001484 GDI1 Homo_sapiens             | YGLGELPQGFARLSAIYGGTYMLNKPVDIIME-NGKVVGKSEGEVARCKQLICDPSYI |
| 01:9606  | 37487               | NM_001493 GDI1 Homo_sapiens               | YGLGELPQGFARLSAIYGGTYMLNKPVDIIME-NGKVVGKSEGEVARCKQLICDPSYI |
| 02:9598  | 37487               | NM_001009061 GDI1 Pan_troglodytes         | YGLGELPQGFARLSAIYGGTYMLNKPVDIIME-NGKVVGKSEGEVARCKQLICDPSYI |
| 04:9913  | 37487               | NM_174064 GDI1 Bos_taurus                 | YGLGELPQGFARLSAIYGGTYMLNKPVDIIME-NGKVVGKSEGEVARCKQLICDPSYI |
| 05:9615  | 37487               | NM_001003185 GDI1 Canis_lupus_familiaris  | YGLGELPQGFARLSAIYGGTYMLNKPVDIIME-NGKVVGKSEGEVARCKQLICDPSYI |
| 06:10116 | 37487               | NM_017088 Gdi1 Rattus_norvegicus          | YGLGELPQGFARLSAIYGGTYMLNKPVDIIME-NGKVVGKSEGEVARCKQLICDPSYI |
| 07:10090 | 37487               | NM_010273 Gdi1 Mus_musculus               | YGLGELPQGFARLSAIYGGTYMLNKPVDIIME-NGKVVGKSEGEVARCKQLICDPSYI |
| 10:7955  | 37487               | NM_001020608 gdi1 Danio_rerio             | YGLGELPQGFARLSAIYGGTYMLNKPVDIIME-NGKVVGKSEGEVARCKQLICDPSYI |
| 12:7227  | 37487               | NM_001259024 Gdi Drosophila_melanogaster  | YGLGELPQGFARLSAIYGGTYMLNKPVDIIME-NGKVVGKSEGEVARCKQLICDPSYI |
| 12:7227  | 37487               | NM_001298852 Gdi Drosophila_melanogaster  | YGLGELPQGFARLSAIYGGTYMLNKPVDIIME-NGKVVGKSEGEVARCKQLICDPSYI |
| 12:7227  | 37487               | NM_078800 Gdi Drosophila_melanogaster     | YGLGELPQGFARLSAIYGGTYMLNKPVDIIME-NGKVVGKSEGEVARCKQLICDPSYI |
| 13:6239  | 37487               | NM_001047578 gdi-1 Caenorhabditis_elegans | YGLGELPQGFARLSAIYGGTYMLNKPVDIIME-NGKVVGKSEGEVARCKQLICDPSYI |
| 13:6239  | 37487               | NM_001047579 gdi-1 Caenorhabditis_elegans | YGLGELPQGFARLSAIYGGTYMLNKPVDIIME-NGKVVGKSEGEVARCKQLICDPSYI |
| 13:6239  | 37487               | NM_001268907 gdi-1 Caenorhabditis_elegans | YGLGELPQGFARLSAIYGGTYMLNKPVDIIME-NGKVVGKSEGEVARCKQLICDPSYI |
| 15:3702  | 37487               | NM_001084585 GDI1 Arabidopsis_thaliana    | YGLGELPQGFARLSAIYGGTYMLNKPVDIIME-NGKVVGKSEGEVARCKQLICDPSYI |
| 15:3702  | 37487               | NM_115855 GDI2 Arabidopsis_thaliana       | YGLGELPQGFARLSAIYGGTYMLNKPVDIIME-NGKVVGKSEGEVARCKQLICDPSYI |
| 15:3702  | 37487               | NM_129973 GDI1 Arabidopsis_thaliana       | YGLGELPQGFARLSAIYGGTYMLNKPVDIIME-NGKVVGKSEGEVARCKQLICDPSYI |

|         |                     |                                   |                                                    |
|---------|---------------------|-----------------------------------|----------------------------------------------------|
| 00:1    | Ac-AAA              | AAAAATAAVKEEEEPSGR                | -----                                              |
| 00:2    | Ac-AAATAAVKEEEEPSGR | -----                             |                                                    |
| 00:3    | Ac-AAA              | AAAAATAAVKEEEEPSGR                | -----                                              |
| 00:4    | Ac-AATAAVKEEEEPSGR  | -----                             |                                                    |
| 01:9606 | 37487               | 0#NP_001484 GDI1 Homo_sapiens     | PDRVRKAGQVIRIICILSHPIKNTNDANSCQIIIPQNQVNRK-----SDI |
| 01:9606 | 37487               | NM_001493 GDI1 Homo_sapiens       | PDRVRKAGQVIRIICILSHPIKNTNDANSCQIIIPQNQVNRK-----SDI |
| 02:9598 | 37487               | NM_001009061 GDI1 Pan_troglodytes | PDRVRKAGQVIRIICILSHPIKNTNDANSCQIIIPQNQVNRK-----SDI |
| 04:9913 | 37487               | NM_174064 GDI1 Bos_taurus         | PDRVRKAGQVIRIICILSHPIKNTNDANSCQIIIPQNQVNRK-----SDI |

```

00:01|Ac-AAAAVAATAAVKEEEEPSGR
00:02|Ac-AAATAAVKEEEEPSGR
00:03|Ac-AAVAATAAVKEEEEPSGR
00:04|Ac-AAATAVKEEEEPSGR
01:9606|37487|0#NP_001484|GDI1|Homo_sapiens
01:9606|37487|NM_001493|GDI1|Homo_sapiens
02:9598|37487|NM_001009061|GDI1|Pan_troglodytes
04:9913|37487|NM_174064|GDI1|Bos_taurus
05:9615|37487|NM_001003185|GDI1|Canis_lupus_familiaris
06:10116|37487|NM_017088|Gdi1|Rattus_norvegicus
07:10090|37487|NM_010273|Gdi1|Mus_musculus
10:7955|37487|NM_001020608|gdi1|Danio_rerio
12:7227|37487|NM_001259024|Gdi|Drosophila_melanogaster
12:7227|37487|NM_001298852|Gdi|Drosophila_melanogaster
12:7227|37487|NM_078800|Gdi|Drosophila_melanogaster
13:6239|37487|NM_001047578|gdi-1|Caenorhabditis_elegans
13:6239|37487|NM_001047579|gdi-1|Caenorhabditis_elegans
13:6239|37487|NM_001268907|gdi-1|Caenorhabditis_elegans
15:3702|37487|NM_001084585|GDI1|Arabidopsis_thaliana
15:3702|37487|NM_115855|GDI2|Arabidopsis_thaliana
15:3702|37487|NM_129973|GDI1|Arabidopsis_thaliana

```

[illegible]

***NDUFA2***

Ac-MELATSILTR

CLUSTAL O(1.2.1) multiple sequence alignment

|                                                         |                                                               |
|---------------------------------------------------------|---------------------------------------------------------------|
| 00:1 Ac-MELATSILTR                                      | -----MELATSILTR-----                                          |
| 01:9606 37628 0#NP_001171941 NDUFA2 Homo_sapiens        | -----MAAAAAS-                                                 |
| 01:9606 37628 0#NP_002479 NDUFA2 Homo_sapiens           | -----MAAAAAS-                                                 |
| 01:9606 37628 NM_001185012 NDUFA2 Homo_sapiens          | PRSGPTILLYHWPSFTPLPHAAYGLGFRVRGWSRSTWPEDELELATSILTRMAAAAAS-   |
| 01:9606 37628 NM_002488 NDUFA2 Homo_sapiens             | PRSGPTILLYHWPSFTPLPHAAYGLGFRVRGWSRSTWPEDELELATSILTRMAAAAAS-   |
| 03:9544 37628 NM_001261499 NDUFA2 Macaca_mulatta        | -----PEDELELGTSVLAKMAAAAAS-                                   |
| 04:9913 37628 NM_175815 NDUFA2 Bos_taurus               | -----VLAEMAAAAAI-                                             |
| 06:10116 37628 NM_001106153 Ndufa2 Rattus_norvegicus    | -----LGAPLLAKMAA--AS-                                         |
| 07:10090 37628 NM_010885 Ndufa2 Mus_musculus            | -----LGAPLLTKMAAAAAS-                                         |
| 08:9031 37628 NM_001302137 NDUFA2 Gallus_gallus         | -----RKMAAAVV-                                                |
| 09:8364 37628 NM_001102777 ndufa2 Xenopus_tropicalis    | -----AKMAAAVV-                                                |
| 10:7955 37628 NM_001024420 ndufa2 Danio_rerio           | -----TVMAAAVV-                                                |
| 12:7227 37628 NM_144084 CG15434 Drosophila_melanogaster | -----TF-----QNRK--SGAKM                                       |
| 15:3702 37628 NM_124163 AT5G47890 Arabidopsis_thaliana  | -----FFRCVASEELR                                              |
| 00:1 Ac-MELATSILTR                                      | -----                                                         |
| 01:9606 37628 0#NP_001171941 NDUFA2 Homo_sapiens        | ----RGVGAK--LGLREIRIHLCCQRSPGSGQVRDFIEKRYVELKKANPDLPIILIRECSD |
| 01:9606 37628 0#NP_002479 NDUFA2 Homo_sapiens           | ----RGVGAK--LGLREIRIHLCCQRSPGSGQVRDFIEKRYVELKKANPDLPIILIRECSD |
| 01:9606 37628 NM_001185012 NDUFA2 Homo_sapiens          | ----RGVGAK--LGLREIRIHLCCQRSPGSGQVRDFIEKRYVELKKANPDLPIILIRECSD |
| 01:9606 37628 NM_002488 NDUFA2 Homo_sapiens             | ----RGVGAK--LGLREIRIHLCCQRSPGSGQVRDFIEKRYVELKKANPDLPIILIRECSD |
| 03:9544 37628 NM_001261499 NDUFA2 Macaca_mulatta        | ----RGIGAK--LGLREIRIHLCCQRSPGSGQVRDFIEKRYVELKKANPDLPIILIRECSD |
| 04:9913 37628 NM_175815 NDUFA2 Bos_taurus               | ----RGVRGK--LGLREIRIHLCCQRSPGSGQVRDFIEKRYVELKKANPDLPIILIRECSD |
| 06:10116 37628 NM_001106153 Ndufa2 Rattus_norvegicus    | ----RVVGAK--QVLREIRIHLCCQRSPGSGQVRDFIQQRYVELKKAHNPDLPILIRECSE |
| 07:10090 37628 NM_010885 Ndufa2 Mus_musculus            | ----RAVGAK--LGLREIRVHLCQRSPGSGQVRDFIVQRYVELKKAHNPLPILIRECSE   |
| 08:9031 37628 NM_001302137 NDUFA2 Gallus_gallus         | ----RGIGGGLGRSLRELVRHLCQRSAGSRGAREFIEQHYVTLKQANPDFPILIRECSG   |
| 09:8364 37628 NM_001102777 ndufa2 Xenopus_tropicalis    | ----RSVGSKLSRNVREIRIHLCCSSAASQVRDFIEQHYVELKKANPEFPILIRECSG    |
| 10:7955 37628 NM_001024420 ndufa2 Danio_rerio           | ----RGIGSNLSKNLREIRLHLCQISAASQGTDRDFIEQHYVTLKKANPQFPILIRECSG  |
| 12:7227 37628 NM_144084 CG15434 Drosophila_melanogaster | G--ITLFRLASFTPKLKLRIILDPKGDTSGKVREYVERFYPNLKKSNPDLPIILVRECSG  |
| 15:3702 37628 NM_124163 AT5G47890 Arabidopsis_thaliana  | GRRRTMAWRGSIKSMKELRILLCCQSSPASAPTRTFVEKNYKDLKSLNPKLPILIRECSG  |
| 00:1 Ac-MELATSILTR                                      | -----                                                         |
| 01:9606 37628 0#NP_001171941 NDUFA2 Homo_sapiens        | VQPKLWARYASRVQNS-----                                         |
| 01:9606 37628 0#NP_002479 NDUFA2 Homo_sapiens           | VQPKLWARYAFGQETNVPLNNFSADQVTRALENVLSGKA---                    |
| 01:9606 37628 NM_001185012 NDUFA2 Homo_sapiens          | VQPKLWARYASRVQNS-----                                         |
| 01:9606 37628 NM_002488 NDUFA2 Homo_sapiens             | VQPKLWARYAFGQETNVPLNNFSADQVTRALENVLSGKA---                    |
| 03:9544 37628 NM_001261499 NDUFA2 Macaca_mulatta        | VQPKLWARYAFGQEKNVPLNNFSADQVTRALENVLSGKA---                    |
| 04:9913 37628 NM_175815 NDUFA2 Bos_taurus               | VQPKLWARYAFGQEKNVSLNNFSADQVTRALENVLSGKA---                    |
| 06:10116 37628 NM_001106153 Ndufa2 Rattus_norvegicus    | VQPKLWARYAFGQEKNVSLNNLSAAEVTKAMENVLSSKA---                    |
| 07:10090 37628 NM_010885 Ndufa2 Mus_musculus            | VQPKLWARYAFGQEKTVSLNNLSADEVTRAMQNVLSGKA---                    |
| 08:9031 37628 NM_001302137 NDUFA2 Gallus_gallus         | VQPRWLWARYEFGKEKSVSLHNLSDVEVAKALENIVKGKV---                   |
| 09:8364 37628 NM_001102777 ndufa2 Xenopus_tropicalis    | VQPKLWARYDFGKETNVSLNNLNVDQVARALESVVTTRKP---                   |
| 10:7955 37628 NM_001024420 ndufa2 Danio_rerio           | VQPVWLWARYGFGKEHSVSLDNMSAEQVAKALETVVNAKP---                   |
| 12:7227 37628 NM_144084 CG15434 Drosophila_melanogaster | VQPRLYARYGNGKEVSLSLANHAAPDIHKNLEAVGK-----                     |
| 15:3702 37628 NM_124163 AT5G47890 Arabidopsis_thaliana  | VQPMQWARYDMGVERCVNLDGLTEPQILKALENLVKSGATKA                    |

*ORC5*

Ac-AALASAVVPAR

|                                                      |  |  |  |  |  |                                                            |  |  |  |  |  |  |  |  |  |  |
|------------------------------------------------------|--|--|--|--|--|------------------------------------------------------------|--|--|--|--|--|--|--|--|--|--|
|                                                      |  |  |  |  |  | -----                                                      |  |  |  |  |  |  |  |  |  |  |
| 001:1 Ac-AALASAVVPAR                                 |  |  |  |  |  |                                                            |  |  |  |  |  |  |  |  |  |  |
| 01:9606 37636 0#NP_002544 ORC5 Homo_sapiens          |  |  |  |  |  |                                                            |  |  |  |  |  |  |  |  |  |  |
| 01:9606 37636 0#NP_859531 ORC5 Homo_sapiens          |  |  |  |  |  |                                                            |  |  |  |  |  |  |  |  |  |  |
| 01:9606 37636 NM_001197292 ORC5 Homo_sapiens         |  |  |  |  |  | -----PGSAGSSSHDAAGPVSGGSV---GRQTRE----RLRLV                |  |  |  |  |  |  |  |  |  |  |
| 01:9606 37636 NM_002553 ORC5 Homo_sapiens            |  |  |  |  |  | -----PGSAGSSSHDAAGPVSGGSV---GRQTRE----RLRLV                |  |  |  |  |  |  |  |  |  |  |
| 01:9606 37636 NM_181747 ORC5 Homo_sapiens            |  |  |  |  |  | -----PGSAGSSSHDAAGPVSGGSV---GRQTRE----RLRLV                |  |  |  |  |  |  |  |  |  |  |
| 03:9544 37636 NM_001261088 ORC5 Macaca_mulatta       |  |  |  |  |  | -----GLPY-----PGKG---PACARD----LWAVC                       |  |  |  |  |  |  |  |  |  |  |
| 04:9913 37636 NM_001099704 ORC5 Bos_taurus           |  |  |  |  |  | -----V                                                     |  |  |  |  |  |  |  |  |  |  |
| 06:10116 37636 NM_001014186 ORC5 Rattus_norvegicus   |  |  |  |  |  | -----RT----TLNER                                           |  |  |  |  |  |  |  |  |  |  |
| 07:10090 37636 NM_011959 ORC5 Mus_musculus           |  |  |  |  |  | -----TPEW                                                  |  |  |  |  |  |  |  |  |  |  |
| 08:9031 37636 NM_001030729 ORC5 Gallus_gallus        |  |  |  |  |  | -----DLD                                                   |  |  |  |  |  |  |  |  |  |  |
| 09:8364 37636 NM_001017013 ORC5 Xenopus_tropicalis   |  |  |  |  |  | -----HFATLPPI-----NVT----ISEVA                             |  |  |  |  |  |  |  |  |  |  |
| 10:7955 37636 NM_213198 ORC5 Danio_rerio             |  |  |  |  |  | -----KYI---TKNCNVF---LLIHNL                                |  |  |  |  |  |  |  |  |  |  |
| 12:7227 37636 NM_057784 ORC5>Drosophila_melanogaster |  |  |  |  |  |                                                            |  |  |  |  |  |  |  |  |  |  |
| 15:3702 37636 NM_119137 ORC5 Arabidopsis_thaliana    |  |  |  |  |  | RTQSTTTTSFVFVSYLLFSFSSVGIGNRRLAGFNMPKKESSKVTRRSTRSSASVTVEN |  |  |  |  |  |  |  |  |  |  |

|                     |       |              |      |                         |                                                               |                          |
|---------------------|-------|--------------|------|-------------------------|---------------------------------------------------------------|--------------------------|
| 00:1 Ac-AALASAVVPAR |       |              |      |                         |                                                               | -----AAL-AS--AVVPAR----- |
| 01:9606             | 37636 | 0#NP_002544  | ORC5 | Homo_sapiens            | -----MPHENNVLCRESQVSILQSLFGERHHFSFPSFIYGHT                    |                          |
| 01:9606             | 37636 | 0#NP_859531  | ORC5 | Homo_sapiens            | -----MPHENNVLCRESQVSILQSLFGERHHFSFPSFIYGHT                    |                          |
| 01:9606             | 37636 | NM_001197292 | ORC5 | Homo_sapiens            | QGSCGL-AAL-AS--AVVPARMPHLENVLCRESQVSILQSLFGERHHFSFPSFIYGHT    |                          |
| 01:9606             | 37636 | NM_002553    | ORC5 | Homo_sapiens            | QGSCGL-AAL-AS--AVVPARMPHLENVLCRESQVSILQSLFGERHHFSFPSFIYGHT    |                          |
| 01:9606             | 37636 | NM_181747    | ORC5 | Homo_sapiens            | QGSCGL-AAL-AS--AVVPARMPHLENVLCRESQVSILQSLFGERHHFSFPSFIYGHT    |                          |
| 03:9544             | 37636 | NM_001261088 | ORC5 | Macaca_mulatta          | TGHCG-----VPARMPHLENVLCRESQVSTLQSLFGERHHFSFPSFIYGHT           |                          |
| 04:9913             | 37636 | NM_001099704 | ORC5 | Bos_taurus              | KLGCIW-RRWPRA-----LSSSAMPHEENMVLCRESQVSTLQSLFGERHHFSFPSFIYGHT |                          |
| 06:10116            | 37636 | NM_001014186 | ORC5 | Rattus_norvegicus       | RRSDDR-PTTLQY---QVVPAKMSHLMVLCREAQVSTLQSLFGERHHFSFPSFIYGHT    |                          |
| 07:10090            | 37636 | NM_011959    | ORC5 | Mus_musculus            | RRADNR-PTAQY---QVVPAKMSHLMVLCREAQVSTLQSLFGERHHFSFPSFIYGHT     |                          |
| 08:9031             | 37636 | NM_001030729 | ORC5 | Gallus_gallus           | YRNIRM-PILEPH---AYPPATLLCLSLVPCRESQVMLLSIFGERQHLSFPSFIYGHT    |                          |
| 09:8364             | 37636 | NM_001017013 | ORC5 | Xenopus_tropicalis      | LHSAEM-SSLAHT---AYPEEKLEVAKLTLCSRESQVSTLLSIFGERQHLSPFSFIYGHT  |                          |
| 10:7955             | 37636 | NM_213198    | ORC5 | Danio_rerio             | LEYQRMPVTLKQP---GYPEDTLRTLAEKLPCRETQVTSLLSGMQPDHYSYPSAIYIGHR  |                          |
| 12:7227             | 37636 | NM_057784    | ORC5 | Drosophila_melanogaster | -----KQT---TAMEAICSSLSEPLFCREAAIETLGLIGDSSTYSYPISVLYFGHS      |                          |
| 15:3702             | 37636 | NM_119137    | ORC5 | Arabidopsis_thaliana    | EPIESHTPTIDLTGEESITIDAVLSNPFGRSQIFDFIRLMGPLDCPTL-PIMIYGGA     |                          |

|                     |       |              |      |                         |                                                               |
|---------------------|-------|--------------|------|-------------------------|---------------------------------------------------------------|
| 00:1 Ac-AALASAVVPAR |       |              |      |                         |                                                               |
| 01:9606             | 37636 | 0#NP_002544  | ORC5 | Homo_sapiens            | ASGKTYVTQTLCLKL----ELPHVFVNCVECFTRLRLLEQLINKLNHLN-SSEDGCSTEI  |
| 01:9606             | 37636 | 0#NP_859531  | ORC5 | Homo_sapiens            | ASGKTYVTQTLCLKL----ELPHVFVNCVECFTRLRLLEQLINKLNHLN-SSEDGCSTEI  |
| 01:9606             | 37636 | NM_001197292 | ORC5 | Homo_sapiens            | ASGKTYVTQTLCLKL----ELPHVFVNCVECFTRLRLLEQLINKLNHLN-SSEDGCSTEI  |
| 01:9606             | 37636 | NM_002553    | ORC5 | Homo_sapiens            | ASGKTYVTQTLCLKL----ELPHVFVNCVECFTRLRLLEQLINKLNHLN-SSEDGCSTEI  |
| 01:9606             | 37636 | NM_181747    | ORC5 | Homo_sapiens            | ASGKTYVTQTLCLKL----ELPHVFVNCVECFTRLRLLEQLINKLNHLN-SSEDGCSTEI  |
| 03:9544             | 37636 | NM_001261088 | ORC5 | Macaca_mulatta          | ASGKTYVTQTLCLKL----ELPHVFVNCVECFTRLRLLEQLINKLNHLN-SSEDGCSTEI  |
| 04:9913             | 37636 | NM_001099704 | ORC5 | Bos_taurus              | ASGKTYVTQTLCLRSI----ELPHVFVNCVECFTRLRLLEQLINKLNHLN-SSSEECSTHI |
| 06:10116            | 37636 | NM_001014186 | orc5 | Rattus_norvegicus       | ASGKTYVTQTLCLKL----ELPHAFVNCVECFTRLLLEQLINKLNLSHS-SSAEACESTH  |
| 07:10090            | 37636 | NM_011959    | orc5 | Mus_musculus            | ASGKTYVTQTLCLKL----ELPHAFVNCVECFSTRLLLEQLINKLNLSHN-SDAGCCSTEM |
| 08:9031             | 37636 | NM_001030729 | ORC5 | Gallus_gallus           | SGSKGYVMKTLLNTL----QLPHVFVNCVECFSTRLLLEEILQLQNLN-SS-ETRRASPV  |
| 09:8364             | 37636 | NM_001017013 | orc5 | Xenopus_tropicalis      | GTGKTYLVQLVLSTL----ELPCAFINCVCEFTPRLLFEQILNHHLHHHPAPENEFSSKE  |
| 10:7955             | 37636 | NM_213198    | orc5 | Danio_rerio             | ATGKSHVVLTIMKDL----ELPHASFVDCVECSYAGLLFYQVLSALFGP-----DSAALLP |
| 12:7227             | 37636 | NM_057784    | ORC5 | Drosophila_melanogaster | GTGKTALTAFRLKECGKRQNVRTAHLNAIECYTKMILEILLDSLPADQ-----GDAL     |
| 15:3702             | 37636 | NM_191137    | ORC5 | Arabidopsis_thaliana    | STGKTSVVVLQVLRHL----NRPFVYSRCCTYNPRILFESILNQSLHLRKLCSLNGYSSAA |

```

00:1|Ac-AALASAVVPAR
01:9606|37636|0#NP_002544|ORC5|Homo_sapiens|TCETFNDFVRLFKQVTTA-----ENLKDQTVYIVLDKAEYLRDMEAN
01:9606|37636|0#NP_859531|ORC5|Homo_sapiens|TCETFNDFVRLFKQVTTA-----ENLKDQTVYIVLDKAEYLRDMEAN
01:9606|37636|NM_001197292|ORC5|Homo_sapiens|TCETFNDFVRLFKQVTTA-----ENLKDQTVYIVLDKAEYLRDMEAN
01:9606|37636|NM_002553|ORC5|Homo_sapiens|TCETFNDFVRLFKQVTTA-----ENLKDQTVYIVLDKAEYLRDMEAN
01:9606|37636|NM_181747|ORC5|Homo_sapiens|TCETFNDFVRLFKQVTTA-----ENLKDQTVYIVLDKAEYLRDMEAN
03:9544|37636|NM_001261088|ORC5|Macaca_mulatta|TCETFNDFVRLFKQVTAA-----ENLKDQTVYIVLDKAEYLRDMEAN
04:9913|37636|NM_001099704|ORC5|Bos_taurus|TCEIFNDFVRLFKRITEA-----ENLKDQTVYIVLDKAEYLRDMEAN
06:10116|37636|NM_001014186|Orc5|Rattus_norvegicus|TCETFNDFVRLFKQVTTA-----EHLKDQTVYIVLDKADYLRDMEAN
07:10090|37636|NM_011959|Orc5|Mus_musculus|TCETFNDFVQLFKQVTTA-----EHLKDQTVYIVLDKAEYLRDMEAN
08:9031|37636|NM_001030729|ORC5|Gallus_gallus|PCDTFNDFVRLFKQALVS-----QNLQDQTVYVVLDRAEQLRMEAN
09:8364|37636|NM_001017013|orc5|Xenopus_tropicalis|RCDTFNDFVRLYNRGMSE-----LSL-QETPYIVLDKAEYLRDMAN
10:7955|37636|NM_213198|orc5|Danio_rerio|RCPSLSDFVRLYKQSSN-----T-PATQTRYIVLDRAERIRMDPFS
12:7227|37636|NM_057784|Orc5|Drosophila_melanogaster|KVDNMLDFVEQLRRQA-A-----TRVEDQGFLIADVNERLRDMDAN
15:3702|37636|NM_19137|ORC5|Arabidopsis_thaliana|RCDKPSDFVNLRLREALSSVIKLTSETSETSRSDKPEKPMGMVYLILDNVDLIRDWDK

```

```

00:1|Ac-AALASAVVPAR
01:9606|37636|0#NP_002544|ORC5|Homo_sapiens|LLPGFL---RLQELADRNVTVFLFSEIWEKFRPNTGCFEPFVLYFPDYSIGNLQKILSH
01:9606|37636|0#NP_859531|ORC5|Homo_sapiens|LLPGFL---RLQELADRNVTVFLFSEIWEKFRPNTGCFEPFVLYFPDYSIGNLQKILSH
01:9606|37636|NM_001197292|ORC5|Homo_sapiens|LLPGFL---RLQELADRNVTVFLFSEIWEKFRPNTGCFEPFVLYFPDYSIGNLQKILSH
01:9606|37636|NM_002553|ORC5|Homo_sapiens|LLPGFL---RLQELADRNVTVFLFSEIWEKFRPNTGCFEPFVLYFPDYSIGNLQKILSH
01:9606|37636|NM_181747|ORC5|Homo_sapiens|LLPGFL---RLQELADRNVTVFLFSEIWEKFRPNTGCFEPFVLYFPDYSIGNLQKILSH
03:9544|37636|NM_001261088|ORC5|Macaca_mulatta|LLPGFL---RLQELADRNVTVFLFSEIWEKFRPNTGCFEPFVLYFPDYSIGNLQKILSH
04:9913|37636|NM_001099704|ORC5|Bos_taurus|LLPGFL---RLQELTGRNVTVFLFSEIWEKFRPNTGCFEPFVLYFPDYSIGNLQKILSH
06:10116|37636|NM_001014186|orc5|Rattus_norvegicus|LLPGFL---RLQELTDRNVTVFLFSEIWEKFRPNTGCFEPFVLFHPDYSIGNLQKILSH
07:10090|37636|NM_011959|orc5|Mus_musculus|LLPGLL---RLQELTDRNVTVFLFSEIWEKFRPNTGCFEPFVLYFPDYSIGNLQKILSH
08:9031|37636|NM_001030729|ORC5|Gallus_gallus|ILPAFL---RLQELTDRNVTVILLSEIWEKFRPNTGCFEPFVLYFPDYSIGHLQKILSQ
09:8364|37636|NM_001017013|orc5|Xenopus_tropicalis|LLPGFL---RLQELTENVTVFLTEIWEKFRPNTGCFEPFVLYFPDYSKVELQKILSS
10:7955|37636|NM_213198|orc5|Danio_rerio|LPAALL---RLQELVNDNVTIILLSEIWEKFRPNTGCFEPFVLFHPDYSKVELQKILSS
12:7227|37636|NM_057784|ORC5|Drosophila_melanogaster|VLPVLL---RLQELTNLNLCVILLSQLPFEKFYNTKGLSEIVCLHLAQYKNAETQRILGS
15:3702|37636|NM_119137|ORC5|Arabidopsis_thaliana|TIIQLQFLSLYTVLKMPQLGIIILISGLPPDVVYSNMGYTDPIPLYFPEYSEEDLRQIFPL

```

```
00:1|Ac-AALASAVVPAR
01:9606|37636|0|NP_002544|ORC5|Homo_sapiens
01:9606|37636|0|NP_859531|ORC5|Homo_sapiens
01:9606|37636|NM_001197292|ORC5|Homo_sapiens
01:9606|37636|NM_002553|ORC5|Homo_sapiens
01:9606|37636|NM_181747|ORC5|Homo_sapiens
03:9544|37636|NM_001261088|ORC5|Macaca_mulatta
04:9913|37636|NM_001099704|ORC5|Bos_taurus
06:10116|37636|NM_001014186|orc5|Rattus_norvegicus
07:10090|37636|NM_011959|orc5|Mus_musculus
08:9031|37636|NM_001030729|ORC5|Gallus_gallus
09:8364|37636|NM_001017013|orc5|Xenopus_tropicalis
10:7955|37636|NM_213198|orc5|Danio_rerio
12:7227|37636|NM_057784|ORC5|Drosophila_melanogaster
15:3702|37636|NM_119137|ORC5|Arabidopsis_thaliana
```

```

--LKKHEKTSNHL LGPKFPFLDRLLAILYSIVDSR-----VAPT
-----
--LKKHEKTSNHL LGPKFPFLDRLLAILYSIVDSR-----VAPT
-----
--LKKHEKTSNHL LGPKFPFLDRLLAILYSIVDSR-----VAPT
--LKKHEKTSNHL LGPKFPFLDRLLAILYSIVDSR-----VAPT
--LKKHEKTSNHL LGPKFPFLDRLLAILYSIVDSR-----VAPT
--LKKHEKTSNHL LGPKFPFLDRLLAILYSIVDSR-----VAPT
--LKKHEKTSNHL LGPKFPFLDRLLAILYSIVDSR-----VAPT
--LKKHEKTSNHL LGPKFPFLDRLLAILYSIVDSR-----VAPT
--LKKHEKTSNHL LGPKFPFLDRLLAIFYSVVDSR-----VAPT
NARAKTEKMSSTTLGPKSFIDRLLAIFYAILEEK-----VGLT
MEKKEIAEQEAVMKGP GSFPLERLLAIFQCIASVGDSSSGEEDDEEENTTG YDKENNLM

```

```

ANIFSQITSLVTLQLLTLVGHDDQL--DGPKYKCTVSLDFIRAIARTVNFIDIKYLYDFL
-----
ANIFSQITSLVTLQLLTLVGHDDQL--DGPKYKCTVSLDFIRAIARTVNFIDIKYLYDFL
-----
ANIFSQITSLVTLQLLTLVGHDDQL--DGPKYKCTVSLDFIRAIARTVNFIDIKYLYDFL
ANIFSQITSLVTLQLLTLVGHDDQL--DEPKYKCTVSLDFIRAIARTVNFIDIKYLYDFL
ANIFSQITSLVTLQLLTLVGHDDQL--NGPKYKCTVSLDFIRSIARTVNFIDIKYLYDFL
ANIFSQITSLVTLQLLTIVGHEDQL--NGPKYKCTVSLDFIRAIARMVNFIDIKYLYDFL
ANIFSQITSLVTLQLLSVVGNNDQL--DGPYKCTVSLDFIRAIARTVNFIDIKYLYDFL
ANIFSQISSLVTLQLLVGHDDQL--DGPYKCTVSLDFIRAVARTVNFIDVRYLYDFL
ASIFSQISSVLVTLQLLSVQGHDDQL--DSPKYKCAVSLDFILAI SRTVSPDVVKYLYDFL
CNLLSQISTLVHLNLLSFVSGEQNIMESGARLQCTIGLEFVLQIGKVVGFNVRQYLCDFM
SDILLQVSSSLCDANFLIKSGS--CPLEGSIRYRSMVSEDLAQKVAKSLSPFLSKYLRR

```

*KHK*

Ac-AAAGGSLEEELPR

CLUSTAL O(1.2.1) multiple sequence alignment

00:1|Ac-AAAGGSLEEELPR  
01:9606|38187|0#NP\_000212|KHK|Homo\_sapiens  
01:9606|38187|0#NP\_006479|KHK|Homo\_sapiens  
01:9606|38187|NM\_000221|KHK|Homo\_sapiens  
01:9606|38187|NM\_006488|KHK|Homo\_sapiens  
04:9913|38187|NM\_001076351|KHK|Bos\_taurus  
05:9615|38187|NM\_001195155|KHK|Canis\_lupus\_familiaris  
06:10116|38187|NM\_031855|KHK|Rattus\_norvegicus  
07:10090|38187|NM\_001310524|KHK|Mus\_musculus  
07:10090|38187|NM\_001310525|KHK|Mus\_musculus  
07:10090|38187|NM\_008439|KHK|Mus\_musculus  
07:10090|38187|NM\_008439|KHK|Mus\_musculus  
10:7955|38187|NM\_001002636|KHK|Danio\_rerio

00:1|Ac-AAAGGSLEEELPR  
01:9606|38187|0#NP\_000212|KHK|Homo\_sapiens  
01:9606|38187|0#NP\_006479|KHK|Homo\_sapiens  
01:9606|38187|NM\_000221|KHK|Homo\_sapiens  
01:9606|38187|NM\_006488|KHK|Homo\_sapiens  
04:9913|38187|NM\_001076351|KHK|Bos\_taurus  
05:9615|38187|NM\_001195155|KHK|Canis\_lupus\_familiaris  
06:10116|38187|NM\_031855|KHK|Rattus\_norvegicus  
07:10090|38187|NM\_001310524|KHK|Mus\_musculus  
07:10090|38187|NM\_001310525|KHK|Mus\_musculus  
07:10090|38187|NM\_008439|KHK|Mus\_musculus  
07:10090|38187|NM\_008439|KHK|Mus\_musculus  
10:7955|38187|NM\_001002636|KHK|Danio\_rerio

00:1|Ac-AAAGGSLEEELPR  
01:9606|38187|0#NP\_000212|KHK|Homo\_sapiens  
01:9606|38187|0#NP\_006479|KHK|Homo\_sapiens  
01:9606|38187|NM\_000221|KHK|Homo\_sapiens  
01:9606|38187|NM\_006488|KHK|Homo\_sapiens  
04:9913|38187|NM\_001076351|KHK|Bos\_taurus  
05:9615|38187|NM\_001195155|KHK|Canis\_lupus\_familiaris  
06:10116|38187|NM\_031855|KHK|Rattus\_norvegicus  
07:10090|38187|NM\_001310524|KHK|Mus\_musculus  
07:10090|38187|NM\_001310525|KHK|Mus\_musculus  
07:10090|38187|NM\_008439|KHK|Mus\_musculus  
07:10090|38187|NM\_008439|KHK|Mus\_musculus  
10:7955|38187|NM\_001002636|KHK|Danio\_rerio

00:1|Ac-AAAGGSLEEELPR  
01:9606|38187|0#NP\_000212|KHK|Homo\_sapiens  
01:9606|38187|0#NP\_006479|KHK|Homo\_sapiens  
01:9606|38187|NM\_000221|KHK|Homo\_sapiens  
01:9606|38187|NM\_006488|KHK|Homo\_sapiens  
04:9913|38187|NM\_001076351|KHK|Bos\_taurus  
05:9615|38187|NM\_001195155|KHK|Canis\_lupus\_familiaris  
06:10116|38187|NM\_031855|KHK|Rattus\_norvegicus  
07:10090|38187|NM\_001310524|KHK|Mus\_musculus  
07:10090|38187|NM\_001310525|KHK|Mus\_musculus  
07:10090|38187|NM\_008439|KHK|Mus\_musculus  
07:10090|38187|NM\_008439|KHK|Mus\_musculus  
10:7955|38187|NM\_001002636|KHK|Danio\_rerio

00:1|Ac-AAAGGSLEEELPR  
01:9606|38187|0#NP\_000212|KHK|Homo\_sapiens  
01:9606|38187|0#NP\_006479|KHK|Homo\_sapiens  
01:9606|38187|NM\_000221|KHK|Homo\_sapiens  
01:9606|38187|NM\_006488|KHK|Homo\_sapiens  
04:9913|38187|NM\_001076351|KHK|Bos\_taurus  
05:9615|38187|NM\_001195155|KHK|Canis\_lupus\_familiaris  
06:10116|38187|NM\_031855|KHK|Rattus\_norvegicus  
07:10090|38187|NM\_001310524|KHK|Mus\_musculus  
07:10090|38187|NM\_001310525|KHK|Mus\_musculus  
07:10090|38187|NM\_008439|KHK|Mus\_musculus  
07:10090|38187|NM\_008439|KHK|Mus\_musculus  
10:7955|38187|NM\_001002636|KHK|Danio\_rerio

00:1|Ac-AAAGGSLEEELPR  
01:9606|38187|0#NP\_000212|KHK|Homo\_sapiens  
01:9606|38187|0#NP\_006479|KHK|Homo\_sapiens  
01:9606|38187|NM\_000221|KHK|Homo\_sapiens  
01:9606|38187|NM\_006488|KHK|Homo\_sapiens  
04:9913|38187|NM\_001076351|KHK|Bos\_taurus  
05:9615|38187|NM\_001195155|KHK|Canis\_lupus\_familiaris  
06:10116|38187|NM\_031855|KHK|Rattus\_norvegicus

-----AAAGGSLEEELPR-----  
-----  
-----  
TRSGLRVSRGRALLLSFPAPLAAAGGSLEEELPR-GGGARAAGSGDTILLDKRQRPGGTP  
TRSGLRVSRGRALLLSFPAPLAAAGGSLEEELPR-GGGARAAGSGDTILLDKRQRPGGTP  
-----QAEPGRNP  
-----VSLGEELGTQRRSQISLWRGDPILRDKRQSPGGAQ  
-----ETESSRNP  
-----EAEPSRNP  
-----EAEPSRNP  
-----EAEPSRNP  
-----

-----  
-----MEEKQILCVGLVVLVDVISLVDKYPKEDSEIRCLSQRWQRGGNASNSCT  
-----MEEKQILCVGLVVLVDVISLVDKYPKEDSEIRCLSQRWQRGGNASNSCT  
SAGRAGSSGSSLMEEKQILCVGLVVLVDVISLVDKYPKEDSEIRCLSQRWQRGGNASNSCT  
SAGRAGSSGSSLMEEKQILCVGLVVLVDVISLVDKYPKEDSEIRCLSQRWQRGGNASNSCT  
VSQ-AESSGSSFMEEKQILCVGLVVLVDIINVMDKYPEEDTDSRCLSQRWQRGGNASNSCT  
SARRAEGSGSSPMEDKQILCVGLVVLVDIISVVDKYPEEDTDSRCLSQRWQRGGNASNSCT  
LRLRVGSLGSSLMEEKQILCVGLVVLVDIINVVDKYPEEDTDRRCLSQRWQRGGNASNSCT  
LCLRVGSLGSSLMEEKQILCVGLVVLVDIINVVDKYPEEDTDRRCLSQRWQRGGNASNSCT  
LCLRVGSLGSSLMEEKQILCVGLVVLVDIINVVDKYPEEDTDRRCLSQRWQRGGNASNSCT  
LCLRVGSLGSSLMEEKQILCVGLVVLVDIINVVDKYPEEDTDRRCLSQRWQRGGNASNSCT  
----GSLGSSLMEEKQILCVGLVVLVDIINVVDKYPEEDTDRRCLSQRWQRGGNASNSCT  
---FRISFCRENMGKKILCIGLVCLDIINVVDKYPEEDTDRCVSQRWQRGGNASNTCT

-----  
VLSLLGAPCAFMGSMAPGHVADFVLDDLRRYSVDLRYTVFQTGSPVIATVIIINEASG--  
VLSLLGAPCAFMGSMAPGHVADFVLADFRRRGVDVSQVAWQSKGDT PSSCCIINNNG--  
VLSLLGAPCAFMGSMAPGHVADFVLDDLRRYSVDLRYTVFQTGSPVIATVIIINEASG--  
VLSLLGAPCAFMGSMAPGHVADFVLADFRRRGVDVSQVAWQSKGDT PSSCCIINNNG--  
VLSLLGAPCAFMGSLARGHVADFVLDDLRRYSVDLRYVMVFTGSPVISTVIIIEASGSR  
VLSLLGAPCAFMGSMAPGHVADF-----  
VLSLLGARCAFMGSLAHGHVADF-----  
VLSLLGARCAFMGSLAPGHVADFVLDDLQHSVDLRYVVLQTEGSIPTSTVIIINEASGSR  
VLSLLGARCAFMGSLAPGHVAE-----  
VLSLLGARCAFMGSLAPGHVADF-----  
VLSLLGARCAFMGSLAPGHVADF-----  
VLSLLGAPCAFMGSLAPGPVADFVLSDFQMYKIDISLLEHAECSFPA SVVISS-----

-----  
-----SRTILYYDRSLPDVSAT  
-----NRTIVLHDTSLPDVSAT  
-----SRTILYYDRSLPDVSAT  
-----NRTIVLHDTSLPDVSAT  
TILHAYSFLVADFQRQGVDSQVAWQSRGETPCSCCIIINNNGSRTIVLYDTNLPDVSAT  
-----LVADFQRQGVDSQVAWQSGKETPCSCCIVNNSNGSRTIVLYDTNLPDVSAT  
-----LVADFRRRGVDVSQVAWQSQGDTPCSCCIVNNSNGSRTIILYDTNLPDVSAT  
TILHAYSFLVADFQRQGVDSQVQWQSGQDTPCSCCIVNNSNGSRTIILYDTNLPDVSAT  
-----NLPDVSAT  
-----LVADFQRQGVDSQVQWQSQGDTPCSCCIVNNSNGSRTIILYDTNLPDVSAT  
-----LVADFQRQGVDSQVQWQSQGDTPCSCCIVNNSNGSRTIILYDTNLPDVSAT  
-----VTGSTRITILHMNRNLPDVSVE

-----  
DFEKVDLTQFKWIHIEGRNASEQVKMLQRIDAHNTRQPPEQKIRVSVEVEKPREELFQLF  
DFEKVDLTQFKWIHIEGRNASEQVKMLQRIDAHNTRQPPEQKIRVSVEVEKPREELFQLF  
DFEKVDLTQFKWIHIEGRNASEQVKMLQRIDAHNTRQPPEQKIRVSVEVEKPREELFQLF  
DFEKVDLTQFKWIHIEGRNASEQVKMLQRIDAHNTRQPPEQKIRVSVEVEKPREELFQLF  
DFEKVELTRFKWIHIEGRNASEQVKMLQRIEQHNAQPPESKIQVSVEVEKPREELYQLF  
DFDNVDLTRFKWIHIEGRNASEQVKMLQRIERHNATQPPGQKIQVSVEVEKPREELFQSL  
DFEKVDLTRFKWIHIEGRNASEQVKMLQRIEQYNATQPLQKVRVSVEIEKPREELFQLF  
DFEKVDLTRFKWIHIEGRNASEQVKMLQRIEHNNAQPLPQKVRVSVEIEKPREELFQLF  
DFEKVDLTRFKWIHIEGRNASEQVKMLQRIEHNNAQPLPQKVRVSVEIEKPREELFQLF  
DFEKVDLTRFKWIHIEGRNASEQVKMLQRIEHNNAQPLPQKVRVSVEIEKPREELFQLF  
DFEKVDLTRFKWIHIEGRNASEQVKMLQRIEHNNAQPLPQKVRVSVEIEKPREELFQLF  
DFEKVDLTRFKWIHIEGRNASEQVKMLQRIEHNNAQPLPQKVRVSVEIEKPREELFQLF  
DFSKVDLSQYKVVHWEGRNADEQVKMIERVREYNKKQDEKNRIASVEIEKTRPRELYQLF

-----  
GY--GDVVVFSKDVAKHLGFSAAEEALRGLYGRVRKGAVLVC AWAEEGADALGPDGKLLH  
GY--GEVVVFSKDVAKHLGFRSAGEALKGLYSRVKKGATLIC AWAEEGADALGPDGQLLH

SY--GEVVFVSKDVAKHLGFQSAVEALRGLYSRVKKGATLVCAWAEEGADALGPDGQQLLH  
SY--GEVVFVSKDVAKHLGFQSAVEALRGLYSRVKKGATLVCAWAEEGADALGPDGQQLLH  
SY--GEVVFVSKDVAKHLGFQSAVEALRGLYSRVKKGATLVCAWAEEGADALGPDGQQLLH  
SY--GEVVFVSKDVAKHLGFQSAVEALRGLYSRVKKGATLVCAWAEEGADALGPDGQQLLH  
PL--GDLVVFVSKDVAHQHGFDSAAAALKGFSGRLLKKGATLVCAWAEEGADAMGPDGVI I H

SDAFPPPRVVDTLGAGDTFNASVIFSLSQGRSVQEALRFGCQVAGKKCGLQGFDGIV  
SDAFPPPRVVDTLGAGDTFNASVIFSLSQGRSVQEALRFGCQVAGKKCGLQGFDGIV  
SDAFFFPPRVVDTLGAGDTFNASVIFSLSQGRSVQEALRFGCQVAGKKCGLQGFDGIV  
SDAFPPPRVVDTLGAGDTFNASVIFSLSQGRSVQEALRFGCQVAGKKCGLQGFDGIV  
SDAFPPPRVVDTLGAGDTFNAAVIFLSQKSMQEALRFGCQVAGKKCGLQGFDGIV  
SADFPPPRVVDTLGAGDTFNASVIFSLSQGKTMEALRFGCQVAGKKCGLQGFEGIV  
SDAFPPPRVVDTLGAGDTFNASVIFSLSKGNMQEALRFGCQVAGKKCGLQGFDGIV  
SDAFPPPRVVDTLGAGDTFNASVIFSLSKGNSMQEALRFGCQVAGKKCGLQGFDGIV  
SADFPPPRVVDTLGAGDTFNASVIFSLSKGNSMQEALRFGCQVAGKKCGLQGFDGIV  
SDAFPPPRVVDTLGAGDTFNASVIFSLSKGNSMQEALRFGCQVAGKKCGLQGFDGIV  
SDAFPPPEQLVDTLGAGDTFNASVIYLSLKGGSLQDALTFGCQIAGKKCGVHGYYDGIILH

***RAB32***

Ac-AGLGGVSAAAGGAAAER

|          |                     |              |        |                         |
|----------|---------------------|--------------|--------|-------------------------|
| 00:1     | Ac-AGLGGVSAAGGAAAER |              |        |                         |
| 01:9606  | 38233               | 0#NP_006825  | RAB32  | Homo_sapiens            |
| 01:9606  | 38233               | NM_006834    | RAB32  | Homo_sapiens            |
| 03:9544  | 38233               | NM_001193894 | RAB32  | Macaca_mulatta          |
| 04:9913  | 38233               | NM_001205950 | RAB32  | Bos_taurus              |
| 06:10116 | 38233               | NM_001108902 | Rab32  | Rattus_norvegicus       |
| 07:10090 | 38233               | NM_026405    | Rab32  | Mus_musculus            |
| 08:9031  | 38233               | NM_001277672 | RAB32  | Gallus_gallus           |
| 09:8364  | 38233               | NM_001011276 | rab32  | Xenopus_tropicalis      |
| 10:7955  | 38233               | NM_201332    | rab32a | Danio_rerio             |
| 12:7227  | 38233               | NM_001299308 | ltd    | Drosophila_melanogaster |
| 12:7227  | 38233               | NM_001299309 | ltd    | Drosophila_melanogaster |
| 12:7227  | 38233               | NM_080370    | ltd    | Drosophila_melanogaster |
| 12:7227  | 38233               | NM_165658    | ltd    | Drosophila_melanogaster |
| 12:7227  | 38233               | NM_165659    | ltd    | Drosophila_melanogaster |
| 12:7227  | 38233               | NM_165660    | ltd    | Drosophila_melanogaster |
| 12:7227  | 38233               | NM_165663    | ltd    | Drosophila_melanogaster |
| 13:6239  | 38233               | NM_001029666 | glo-1  | Caenorhabditis_elegans  |

|          |                      |                                           |                                                             |
|----------|----------------------|-------------------------------------------|-------------------------------------------------------------|
| 00:1     | Ac-AGLGGVSAAGAAGAAER |                                           | -----                                                       |
| 01:9606  | 38233                | 0#NP_006825 RAB32 Homo_sapiens            | -----                                                       |
| 01:9606  | 38233                | NM_006834 RAB32 Homo_sapiens              | -----                                                       |
| 03:9544  | 38233                | NM_001193894 RAB32 Macaca_mulatta         | -----                                                       |
| 04:9913  | 38233                | NM_001205950 RAB32 Bos_taurus             | -----                                                       |
| 06:10116 | 38233                | NM_001108902 Rab32 Rattus_norvegicus      | -----                                                       |
| 07:10090 | 38233                | NM_026405 Rab32 Mus_musculus              | -----                                                       |
| 08:9031  | 38233                | NM_001277672 RAB32 Gallus_gallus          | -----                                                       |
| 09:8364  | 38233                | NM_001011276 rab32 Xenopus_tropicalis     | -----                                                       |
| 10:7955  | 38233                | NM_201332 rab32a Danio_rerio              | -----                                                       |
| 12:7227  | 38233                | NM_001299308 ltd Drosophila_melanogaster  | -----                                                       |
| 12:7227  | 38233                | NM_001299309 ltd Drosophila_melanogaster  | -----                                                       |
| 12:7227  | 38233                | NM_080370 ltd Drosophila_melanogaster     | AALRSLSKTKTKRRELKDSTRETRSAREEEAQETPGELEDVASSISTDSGALKTKKKKS |
| 12:7227  | 38233                | NM_165658 ltd Drosophila_melanogaster     | -----                                                       |
| 12:7227  | 38233                | NM_165659 ltd Drosophila_melanogaster     | -----                                                       |
| 12:7227  | 38233                | NM_165660 ltd Drosophila_melanogaster     | -----                                                       |
| 12:7227  | 38233                | NM_165663 ltd Drosophila_melanogaster     | -----                                                       |
| 13:6239  | 38233                | NM_001029666 glo-1 Caenorhabditis_elegans | -----                                                       |

[illegible]

```

00:01|Ac-AGLGGVSAAGGAAAER|-----
01:9606|38233|0#NP_006825|RAB32|Homo_sapiens|-----
01:9606|38233|NM_006834|RAB32|Homo_sapiens|-----
03:9544|38233|NM_001193894|RAB32|Macaca_mulatta|-----
04:9913|38233|NM_001205950|RAB32|Bos_taurus|-----
06:10116|38233|NM_001108902|Rab32|Rattus_norvegicus|-----
07:10090|38233|NM_026405|Rab32|Mus_musculus|-----
08:9031|38233|NM_001277672|RAB32|Gallus_gallus|-----
09:8364|38233|NM_001011276|rab32|Xenopus_tropicalis|-----
10:7955|38233|NM_201332|rab32a|Danio_rerio|-----
12:7227|38233|NM_001299308|ltd|Drosophila_melanogaster|-----
12:7227|38233|NM_001299309|ltd|Drosophila_melanogaster|-----
12:7227|38233|NM_080370|ltd|Drosophila_melanogaster|GKKVEPSPAKKS GKS RPKSDTDYLT PAAEERKPRKKT TTTT VTTTRDTSSSTR TTKLLVSK
12:7227|38233|NM_165658|ltd|Drosophila_melanogaster|-----
12:7227|38233|NM_165659|ltd|Drosophila_melanogaster|-----
12:7227|38233|NM_165660|ltd|Drosophila_melanogaster|-----
12:7227|38233|NM_165663|ltd|Drosophila_melanogaster|-----
13:6239|38233|NM_001029666|qlo-1|Caenorhabditis_elegans|-----

```

```
00:1|Ac-AGLGGVSAAAGGAAER
01:9606|38233|0#NP_006825|RAB32|Homo_sapiens
01:9606|38233|NM_006834|RAB32|Homo_sapiens
```

|          |       |              |        |                         |                                                              |
|----------|-------|--------------|--------|-------------------------|--------------------------------------------------------------|
| 03:9544  | 38233 | NM_001193894 | RAB32  | Macaca_mulatta          | -----                                                        |
| 04:9913  | 38233 | NM_001205950 | RAB32  | Bos_taurus              | -----                                                        |
| 06:10116 | 38233 | NM_001108902 | Rab32  | Rattus_norvegicus       | -----                                                        |
| 07:10090 | 38233 | NM_026405    | Rab32  | Mus_musculus            | -----                                                        |
| 08:9031  | 38233 | NM_001277672 | RAB32  | Gallus_gallus           | -----                                                        |
| 09:8364  | 38233 | NM_001011276 | rab32  | Xenopus_tropicalis      | -----                                                        |
| 10:7955  | 38233 | NM_201332    | rab32a | Danio_rerio             | -----                                                        |
| 12:7227  | 38233 | NM_001299308 | ltd    | Drosophila_melanogaster | -----                                                        |
| 12:7227  | 38233 | NM_001299309 | ltd    | Drosophila_melanogaster | -----                                                        |
| 12:7227  | 38233 | NM_080370    | ltd    | Drosophila_melanogaster | KKPQSPERESPSASPSPLITTTESTRDTPPRERAPAKPSRVQSASGTGAVRKSQSSSASS |
| 12:7227  | 38233 | NM_165658    | ltd    | Drosophila_melanogaster | -----                                                        |
| 12:7227  | 38233 | NM_165659    | ltd    | Drosophila_melanogaster | -----LRRRSKDHTHPPRIGGCMATGVIQSSVVSTSAG                       |
| 12:7227  | 38233 | NM_165660    | ltd    | Drosophila_melanogaster | -----LRRRSKDHTHPPRIGGCMATGVIQSSVVSTSAG                       |
| 12:7227  | 38233 | NM_165663    | ltd    | Drosophila_melanogaster | -----SASGTGAVRKSQSSSASS                                      |
| 13:6239  | 38233 | NM_001029666 | glo-1  | Caenorhabditis_elegans  | -----                                                        |

|          |                     |              |        |                         |                                                               |
|----------|---------------------|--------------|--------|-------------------------|---------------------------------------------------------------|
| 00:1     | Ac-AGLGGVSAAGGAAAER | -----        |        |                         |                                                               |
| 01:9606  | 38233               | 0#NP_006825  | RAB32  | Homo_sapiens            | -----                                                         |
| 01:9606  | 38233               | NM_006834    | RAB32  | Homo_sapiens            | -----                                                         |
| 03:9544  | 38233               | NM_001193894 | RAB32  | Macaca_mulatta          | -----                                                         |
| 04:9913  | 38233               | NM_001205950 | RAB32  | Bos_taurus              | -----                                                         |
| 06:10116 | 38233               | NM_001108902 | Rab32  | Rattus_norvegicus       | -----                                                         |
| 07:10090 | 38233               | NM_026405    | Rab32  | Mus_musculus            | -----                                                         |
| 08:9031  | 38233               | NM_001277672 | RAB32  | Gallus_gallus           | -----                                                         |
| 09:8364  | 38233               | NM_001011276 | rab32  | Xenopus_tropicalis      | -----                                                         |
| 10:7955  | 38233               | NM_201332    | rab32a | Danio_rerio             | -----                                                         |
| 12:7227  | 38233               | NM_001299308 | ltd    | Drosophila_melanogaster | -----                                                         |
| 12:7227  | 38233               | NM_001299309 | ltd    | Drosophila_melanogaster | -----                                                         |
| 12:7227  | 38233               | NM_080370    | ltd    | Drosophila_melanogaster | RKLELMQQQ-QQRGHRNLNARP-----LAEL-----ANTEPQP--SQQSLDP          |
| 12:7227  | 38233               | NM_165658    | ltd    | Drosophila_melanogaster | -----                                                         |
| 12:7227  | 38233               | NM_165659    | ltd    | Drosophila_melanogaster | RQ-NICDCLEQESAGLVKALPKSKSADQLSELTCACLRQCQYLATDLQHPNTQSGHLPVEH |
| 12:7227  | 38233               | NM_165660    | ltd    | Drosophila_melanogaster | RQ-NICDCLEQESAGLVKALPKSKSADQLSELTCACLRQCQYLATDLQHPNTQSGHLPVEH |
| 12:7227  | 38233               | NM_165663    | ltd    | Drosophila_melanogaster | RKLELMQQQ-QQRGHRNLNARP-----LAEL-----ANTEPQP--SQQSLDP          |
| 13:6239  | 38233               | NM_001029666 | glo-1  | Caenorhabditis_elegans  | -----                                                         |

|          |                     |                     |        |                         |                                                              |
|----------|---------------------|---------------------|--------|-------------------------|--------------------------------------------------------------|
| 00:1     | Ac-AGLGGVSAAGGAAAER | -----AGLGGVSAA----- |        |                         |                                                              |
| 01:9606  | 38233               | 0#NP_006825         | RAB32  | Homo_sapiens            | -----                                                        |
| 01:9606  | 38233               | NM_006834           | RAB32  | Homo_sapiens            | -----GPRALAGSGSCDRSGGVSGRGGGLAGLGGVSAA-----                  |
| 03:9544  | 38233               | NM_001193894        | RAB32  | Macaca_mulatta          | -----RALAGSGSCDRSGGVSGRGGGRAGLGGVSAA-----                    |
| 04:9913  | 38233               | NM_001205950        | RAB32  | Bos_taurus              | -----AAACSGSCDPSGGAAARREGRPVSEKFRP-----                      |
| 06:10116 | 38233               | NM_001108902        | Rab32  | Rattus_norvegicus       | -----                                                        |
| 07:10090 | 38233               | NM_026405           | Rab32  | Mus_musculus            | -----                                                        |
| 08:9031  | 38233               | NM_001277672        | RAB32  | Gallus_gallus           | -----WLRGSLLFVP--CPVR-----                                   |
| 09:8364  | 38233               | NM_001011276        | rab32  | Xenopus_tropicalis      | -----                                                        |
| 10:7955  | 38233               | NM_201332           | rab32a | Danio_rerio             | -----                                                        |
| 12:7227  | 38233               | NM_001299308        | ltd    | Drosophila_melanogaster | -----                                                        |
| 12:7227  | 38233               | NM_001299309        | ltd    | Drosophila_melanogaster | -----                                                        |
| 12:7227  | 38233               | NM_080370           | ltd    | Drosophila_melanogaster | STSPPAADGVSSAESAQTIANPPPVVRFEV----GSAVRSPLSAYEAALAAAASQQPN   |
| 12:7227  | 38233               | NM_165658           | ltd    | Drosophila_melanogaster | -----                                                        |
| 12:7227  | 38233               | NM_165659           | ltd    | Drosophila_melanogaster | RHRPVSSGSGSLGALS--AKESPIFVRRQICFPSAETQLHPLPLSSSQFSLRSASPAYAE |
| 12:7227  | 38233               | NM_165660           | ltd    | Drosophila_melanogaster | RHRPVSSGSGSLGALS--AKESPIFVRRQICFPSAETQLHPLPLSSSQFSLRSASPAYAE |
| 12:7227  | 38233               | NM_165663           | ltd    | Drosophila_melanogaster | STSPPAADGVSSAESAQTIANPPPVVRFEV----GSAVRSPLSAYEAALAAAASQQPN   |
| 13:6239  | 38233               | NM_001029666        | glo-1  | Caenorhabditis_elegans  | -----                                                        |

|          |                     |                        |        |                         |                                                             |
|----------|---------------------|------------------------|--------|-------------------------|-------------------------------------------------------------|
| 00:1     | Ac-AGLGGVSAAGGAAAER | -----AGGA--AAE--R----- |        |                         |                                                             |
| 01:9606  | 38233               | 0#NP_006825            | RAB32  | Homo_sapiens            | -----                                                       |
| 01:9606  | 38233               | NM_006834              | RAB32  | Homo_sapiens            | -----AGGA--AAE--REA-----GQGARLG--V---                       |
| 03:9544  | 38233               | NM_001193894           | RAB32  | Macaca_mulatta          | -----AGGG--AGE--REA-----GREARLG--A---                       |
| 04:9913  | 38233               | NM_001205950           | RAB32  | Bos_taurus              | -----AGLP--GRRKEGAAGR-----GPGARRE-RP---                     |
| 06:10116 | 38233               | NM_001108902           | Rab32  | Rattus_norvegicus       | -----LHRR-----VRGPRIC-PVPLE                                 |
| 07:10090 | 38233               | NM_026405              | Rab32  | Mus_musculus            | -----                                                       |
| 08:9031  | 38233               | NM_001277672           | RAB32  | Gallus_gallus           | -----VGST--VALVEANSRP-----GKFAAQC-RSPGS                     |
| 09:8364  | 38233               | NM_001011276           | rab32  | Xenopus_tropicalis      | -----                                                       |
| 10:7955  | 38233               | NM_201332              | rab32a | Danio_rerio             | -----                                                       |
| 12:7227  | 38233               | NM_001299308           | ltd    | Drosophila_melanogaster | -----                                                       |
| 12:7227  | 38233               | NM_001299309           | ltd    | Drosophila_melanogaster | -----                                                       |
| 12:7227  | 38233               | NM_080370              | ltd    | Drosophila_melanogaster | SNEELSDSSIRRLSFAQQQLILGDHDSIEGRRETLYQSVASEYSNQDSGSEDDSEEQAD |
| 12:7227  | 38233               | NM_165658              | ltd    | Drosophila_melanogaster | -----                                                       |
| 12:7227  | 38233               | NM_165659              | ltd    | Drosophila_melanogaster | PK-----PELDLGAI-----EALQLT-----                             |
| 12:7227  | 38233               | NM_165660              | ltd    | Drosophila_melanogaster | PK-----PELDLGAI-----EALQLT-----                             |
| 12:7227  | 38233               | NM_165663              | ltd    | Drosophila_melanogaster | SNEELSDSSIRRLSFAQQQLILGDHDSIEGRRETLYQSVASEYSNQDSGSEDDSEEQAD |
| 13:6239  | 38233               | NM_001029666           | glo-1  | Caenorhabditis_elegans  | -----                                                       |

|          |                     |              |       |                    |                                                              |
|----------|---------------------|--------------|-------|--------------------|--------------------------------------------------------------|
| 00:1     | Ac-AGLGGVSAAGGAAAER | -----        |       |                    |                                                              |
| 01:9606  | 38233               | 0#NP_006825  | RAB32 | Homo_sapiens       | -----MAGGGAGDPGLGAAAA-PAPETREHLFKVLVIGELGVGKTSIIKRYVHQ       |
| 01:9606  | 38233               | NM_006834    | RAB32 | Homo_sapiens       | EARPTA--AALMAGGGAGDPGLGAAAA-PAPETREHLFKVLVIGELGVGKTSIIKRYVHQ |
| 03:9544  | 38233               | NM_001193894 | RAB32 | Macaca_mulatta     | PARRTA--AALMAGGGAGDPGLGAAAA-PAPETREHLFKVLVIGELGVGKTSIIKRYVHQ |
| 04:9913  | 38233               | NM_001205950 | RAB32 | Bos_taurus         | AGGAGS--GALMAGGGAGDPGRGAAAAAPPETSEHLFKVLVIGELGVGKTSIIKRYVHQ  |
| 06:10116 | 38233               | NM_001108902 | Rab32 | Rattus_norvegicus  | REVPTA--VAPMAGERLQQQG---ETATAVPETREHLFKVLVIGELGVGKTSIIKRYVHQ |
| 07:10090 | 38233               | NM_026405    | Rab32 | Mus_musculus       | -----A--VAPMAGEGLQQQG---ASATAAPETREHLFKVLVIGELGVGKTSIIKRYVHQ |
| 08:9031  | 38233               | NM_001277672 | RAB32 | Gallus_gallus      | A-----AGLGRASMA---GGEGPVSGVAESREHLFKVLVIGELGVGKTSIIKRYVHQ    |
| 09:8364  | 38233               | NM_001011276 | rab32 | Xenopus_tropicalis | Q-----SVAMAGEGA---GGEPPSPRAPERKEYLFKVLVIGELGVGKTSIIKRYVHQ    |



|         |       |              |       |                         |     |
|---------|-------|--------------|-------|-------------------------|-----|
| 12:7227 | 38233 | NM_165660    | ltd   | Drosophila_melanogaster | CSC |
| 12:7227 | 38233 | NM_165663    | ltd   | Drosophila_melanogaster | CSC |
| 13:6239 | 38233 | NM_001029666 | glo-1 | Caenorhabditis_elegans  | CC- |

*NME1-NME2*

Ac-MEGTMANCER

CLUSTAL O(1.2.1) multiple sequence alignment

|                    |       |                                          |                                                                |
|--------------------|-------|------------------------------------------|----------------------------------------------------------------|
| 00:1 Ac-MEGTMANCER |       |                                          | -----MEGTMANCER-----                                           |
| 01:9606            | 39553 | 0#NP_001018146 NME1-NME2 Homo_sapiens    | -----MANCERTFIAIKPDGVQ                                         |
| 01:9606            | 39553 | NM_001018136 NME1-NME2 Homo_sapiens      | ALRQRICAEAFRACKCCEPRGSRARFGCWRLQPEFKPKQLEGTMANCERTFIAIKPDGVQ   |
| 10:7955            | 39553 | NM_199970 nme2a Danio_rerio              | -----                                                          |
| 12:7227            | 39553 | NM_001300695 awd Drosophila_melanogaster | -----                                                          |
| 12:7227            | 39553 | NM_001300696 awd Drosophila_melanogaster | -----                                                          |
| 12:7227            | 39553 | NM_057413 awd Drosophila_melanogaster    | -----                                                          |
| 13:6239            | 39553 | NM_060360 ndk-1 Caenorhabditis_elegans   | -----                                                          |
| 15:3702            | 39553 | NM_117000 NDPK1 Arabidopsis_thaliana     | -----                                                          |
| 00:1 Ac-MEGTMANCER |       |                                          | -----                                                          |
| 01:9606            | 39553 | 0#NP_001018146 NME1-NME2 Homo_sapiens    | RGLVGEIIKRFEQKGFRLVGLKFMQASEDLLKEHYVDLKDRPFFAGLVKYMHS GPVVAMV  |
| 01:9606            | 39553 | NM_001018136 NME1-NME2 Homo_sapiens      | RGLVGEIIKRFEQKGFRLVGLKFMQASEDLLKEHYVDLKDRPFFAGLVKYMHS GPVVAMV  |
| 10:7955            | 39553 | NM_199970 nme2a Danio_rerio              | -----                                                          |
| 12:7227            | 39553 | NM_001300695 awd Drosophila_melanogaster | -----                                                          |
| 12:7227            | 39553 | NM_001300696 awd Drosophila_melanogaster | -----                                                          |
| 12:7227            | 39553 | NM_057413 awd Drosophila_melanogaster    | -----                                                          |
| 13:6239            | 39553 | NM_060360 ndk-1 Caenorhabditis_elegans   | -----                                                          |
| 15:3702            | 39553 | NM_117000 NDPK1 Arabidopsis_thaliana     | -----                                                          |
| 00:1 Ac-MEGTMANCER |       |                                          | -----                                                          |
| 01:9606            | 39553 | 0#NP_001018146 NME1-NME2 Homo_sapiens    | WEGLNVVKTGRVMLGETNPADSKPG--TIRG-----DFCIQVGR-TM                |
| 01:9606            | 39553 | NM_001018136 NME1-NME2 Homo_sapiens      | WEGLNVVKTGRVMLGETNPADSKPG--TIRG-----DFCIQVGR-TM                |
| 10:7955            | 39553 | NM_199970 nme2a Danio_rerio              | -----KRVGGGINFRL-----LDCHQTIP-MS                               |
| 12:7227            | 39553 | NM_001300695 awd Drosophila_melanogaster | -----LAFFSVISAT-MA                                             |
| 12:7227            | 39553 | NM_001300696 awd Drosophila_melanogaster | -----RFPTIHLAGISYSGFFCNGEHMKLLMLGTILAFFSVISAT-MA               |
| 12:7227            | 39553 | NM_057413 awd Drosophila_melanogaster    | -----SGFFCNGEHMKLLMLGTILAFFSVISAT-MA                           |
| 13:6239            | 39553 | NM_060360 ndk-1 Caenorhabditis_elegans   | -----M                                                         |
| 15:3702            | 39553 | NM_117000 NDPK1 Arabidopsis_thaliana     | -----GYMCGLYINFLCLRITSNK                                       |
| 00:1 Ac-MEGTMANCER |       |                                          | -----                                                          |
| 01:9606            | 39553 | 0#NP_001018146 NME1-NME2 Homo_sapiens    | ANLERTFIAIKPDGVQGRGLVGEIIKRFEQKGFRLVAMKFLRASEEHLKQHYIDLKDRPFF  |
| 01:9606            | 39553 | NM_001018136 NME1-NME2 Homo_sapiens      | ANLERTFIAIKPDGVQGRGLVGEIIKRFEQKGFRLVAMKFLRASEEHLKQHYIDLKDRPFF  |
| 10:7955            | 39553 | NM_199970 nme2a Danio_rerio              | GNEERTFIAIKPDGVQGRGLVGEIIKRFEQKGFRLVAMKLIQADEDLLRQHYSDDLKDRPFF |
| 12:7227            | 39553 | NM_001300695 awd Drosophila_melanogaster | ANKERTFIMVKPDGVQGRGLVGKIIERFEQKGFKLVALKFTWASKELLEKHYADLSARPFF  |
| 12:7227            | 39553 | NM_001300696 awd Drosophila_melanogaster | ANKERTFIMVKPDGVQGRGLVGKIIERFEQKGFKLVALKFTWASKELLEKHYADLSARPFF  |
| 12:7227            | 39553 | NM_057413 awd Drosophila_melanogaster    | ANKERTFIMVKPDGVQGRGLVGKIIERFEQKGFKLVALKFTWASKELLEKHYADLSARPFF  |
| 13:6239            | 39553 | NM_060360 ndk-1 Caenorhabditis_elegans   | SNTERTFIAIKPDGVHRGLVGKIIARFEERGYKLVALKQMTASKAHLEVVHYQDLKDKPFF  |
| 15:3702            | 39553 | NM_117000 NDPK1 Arabidopsis_thaliana     | KTMEQTFIMIKPDGVQGRGLIGEVICRFEKKGFTLKLGLKLSVERSFAEKHYEDLSSKSFF  |
| 00:1 Ac-MEGTMANCER |       |                                          | -----                                                          |
| 01:9606            | 39553 | 0#NP_001018146 NME1-NME2 Homo_sapiens    | PGLVKYMNSGPVVAMVWEGLNVVKTGRVMLGETNPADSKPGTIRGDFCIQVGRNIIHGSD   |
| 01:9606            | 39553 | NM_001018136 NME1-NME2 Homo_sapiens      | PGLVKYMNSGPVVAMVWEGLNVVKTGRVMLGETNPADSKPGTIRGDFCIQVGRNIIHGSD   |
| 10:7955            | 39553 | NM_199970 nme2a Danio_rerio              | PGLVSYMSAGPVVAMVWEGFNVIKTGRVMLGETNPIDSKPGTIRGDFCVQVGRNIIHGSD   |
| 12:7227            | 39553 | NM_001300695 awd Drosophila_melanogaster | PGLVNYMNSGPVVPMVWEGLNVVKTGRQMLGATNPADSLPGTIRGDFCIQVGRNIIHGSD   |
| 12:7227            | 39553 | NM_001300696 awd Drosophila_melanogaster | PGLVNYMNSGPVVPMVWEGLNVVKTGRQMLGATNPADSLPGTIRGDFCIQVGRNIIHGSD   |
| 12:7227            | 39553 | NM_057413 awd Drosophila_melanogaster    | PGLVNYMNSGPVVPMVWEGLNVVKTGRQMLGATNPADSLPGTIRGDFCIQVGRNIIHGSD   |
| 13:6239            | 39553 | NM_060360 ndk-1 Caenorhabditis_elegans   | PSLIEYMSSGPVVAMVWQGLDVVKQGRSMLGATNPASAPGTIRGDFCIQTGRNICHGSD    |
| 15:3702            | 39553 | NM_117000 NDPK1 Arabidopsis_thaliana     | SGLVDYIVSGPVVAMIWEGKNVVLTRKIIIGATNPAASEPGTIRGDFDAIDIGRNVIHGSD  |
| 00:1 Ac-MEGTMANCER |       |                                          | -----                                                          |
| 01:9606            | 39553 | 0#NP_001018146 NME1-NME2 Homo_sapiens    | SVKSAAKEISLWFKPEELVDYK-SCAHDWVYE-                              |
| 01:9606            | 39553 | NM_001018136 NME1-NME2 Homo_sapiens      | SVKSAAKEISLWFKPEELVDYK-SCAHDWVYE-                              |
| 10:7955            | 39553 | NM_199970 nme2a Danio_rerio              | SVESANTEINLWFKPDEICDYT-KCQESWINS-                              |
| 12:7227            | 39553 | NM_001300695 awd Drosophila_melanogaster | AVESAAKEIALWFKNEKELVTWT-PAAKDWIYE-                             |
| 12:7227            | 39553 | NM_001300696 awd Drosophila_melanogaster | AVESAAKEIALWFKNEKELVTWT-PAAKDWIYE-                             |
| 12:7227            | 39553 | NM_057413 awd Drosophila_melanogaster    | AVESAAKEIALWFKNEKELVTWT-PAAKDWIYE-                             |
| 13:6239            | 39553 | NM_060360 ndk-1 Caenorhabditis_elegans   | AVDSANREIAHWFKQEEINDYASPPINSWVYE-                              |
| 15:3702            | 39553 | NM_117000 NDPK1 Arabidopsis_thaliana     | SVESARKEIALWFPDGP-VNWQ-SSVHPWVYET                              |

*SLC35A3*

Ac-AVATATGAGGAAGQR

```

00:1|Ac-AVATATGAGGAAGQR
01:9606|40826|0#NP_001258613|SLC35A3|Homo_sapiens
01:9606|40826|0#NP_001258614|SLC35A3|Homo_sapiens
01:9606|40826|0#NP_036375|SLC35A3|Homo_sapiens
01:9606|40826|NM_001271684|SLC35A3|Homo_sapiens
01:9606|40826|NM_001271685|SLC35A3|Homo_sapiens
01:9606|40826|NM_012243|SLC35A3|Homo_sapiens
04:9913|40826|NM_001105386|SLC35A3|Bos_taurus
05:9615|40826|NM_001003385|SLC35A3|Canis_lupus_familiaris
06:10116|40826|NM_001012082|SLC35a3|Rattus_norvegicus
07:10090|40826|NM_144902|SLC35a3|Mus_musculus
08:9031|40826|NM_001031274|SLC35A3|Gallus_gallus
08:9031|40826|NM_001031274|SLC35A3|Gallus_gallus
09:8364|40826|NM_203767|SLC35a3.2|Xenopus_tropicalis
13:6239|40826|NM_061322|nstp-4|Caenorhabditis_elegans

```

-----  
 TYQLKILTTALFVSMSLKKLGVYQWLSLVILMTGFAVFQWPPSDSQD---SKELSAGS  
 TYQLKILTTALFVSMSLKKLGVYQWLSLVILMTGFAVFQWPPSDSQ-L---DSKELSAGS  
 TYQLKILTTALFVSMSLKKLGVYQWLSLVILMTGFAVFQWPPSDSQ-L---DSKELSAGS  
 TYQLKILTTALFVSMSLKKLGVYQWLSLVILMTGFAVFQWPPSDSQD---SKELSAGS  
 TYQLKILTTALFVSMSLKKLGVYQWLSLVILMTGFAVFQWPPSDSQ-L---DSKELSAGS  
 TYQLKILTTALFVSMSLKKLGVYQWLSLVILMTGFAVFQWPPSDSQD---SKELSAGS  
 TYQLKILTTALFVSMSLKKLGVYQWLSLVILMTGFAVFQWPPSDSQEL---NSKELSAGS  
 TYQLKILTTALFVSMSLKKLGVYQWLSLVILMTGFAVFQWPPSDSQEL---DSKELSAGS  
 TYQLKILTTALFVSMSLKKLGMVYQWLSLVILMAGFAVFQWPPSDSQEL---NSKDLSTGS  
 TYQLKILTTALFVSMSLKKLGVYQWLSLVILMAGFAVFQWPPSDSQEL---NSKDLSTGS  
 TYQLKILTTALFVSMSLKKLGIYQWLSLVILMTGFAVFQWPPSDSQAT---AAKEHSAGS  
 TYQLKILTTALFVSMSLKKLGIYQWLSLVILMTGFAVFQWPPSDSQAT---AAKEHSAGS  
 TYQLKILTTALFVSMSLQRLKTHQWMSLLIMAGVALVQWPPSDSSNA---PNKEVSVGS  
 TYQLKILTTAIFSVTLGKSLHRYNWMALILLTAGVALVQVPSGDSTTSKSTAAEHSDASD  
 -----

00:1|Ac-AVATATGAGGAAGQR  
01:9606|40826|0#NP\_001258613|SLC35A3|Homo\_sapiens  
01:9606|40826|0#NP\_001258614|SLC35A3|Homo\_sapiens  
01:9606|40826|0#NP\_036375|SLC35A3|Homo\_sapiens  
01:9606|40826|NM\_001271684|SLC35A3|Homo\_sapiens  
01:9606|40826|NM\_001271685|SLC35A3|Homo\_sapiens  
01:9606|40826|NM\_012243|SLC35A3|Homo\_sapiens  
04:9913|40826|NM\_001105386|SLC35A3|Bos\_taurus  
05:9615|40826|NM\_001003385|SLC35A3|Canis\_lupus\_familiaris  
06:10116|40826|NM\_001012082|Slc35a3|Rattus\_norvegicus  
07:10090|40826|NM\_144902|Slc35a3|Mus\_musculus  
08:9031|40826|NM\_001031274|SLC35A3|Gallus\_gallus  
08:9031|40826|NM\_001031274|SLC35A3|Gallus\_gallus  
09:8364|40826|NM\_203767|slc35a3.2|Xenopus\_tropicalis  
13:6239|40826|NM\_061322|nstp-4|Caenorhabditis\_elegans

00:1|Ac-AVATATGAGGAAGQR  
01:9606|40826|0#NP\_001258613|SLC35A3|Homo\_sapiens  
01:9606|40826|0#NP\_001258614|SLC35A3|Homo\_sapiens  
01:9606|40826|0#NP\_036375|SLC35A3|Homo\_sapiens  
01:9606|40826|NM\_001271684|SLC35A3|Homo\_sapiens  
01:9606|40826|NM\_001271685|SLC35A3|Homo\_sapiens  
01:9606|40826|NM\_012243|SLC35A3|Homo\_sapiens  
04:9913|40826|NM\_001105386|SLC35A3|Bos\_taurus  
05:9615|40826|NM\_001003385|SLC35A3|Canis\_lupus\_familiaris  
06:10116|40826|NM\_001012082|Slc35a3|Rattus\_norvegicus  
07:10090|40826|NM\_144902|Slc35a3|Mus\_musculus  
08:9031|40826|NM\_001031274|SLC35A3|Gallus\_gallus  
08:9031|40826|NM\_001031274|SLC35A3|Gallus\_gallus  
09:8364|40826|NM\_203767|slc35a3.2|Xenopus\_tropicalis  
13:6239|40826|NM\_061322|nstp-4|Caenorhabditis\_elegans

00:1|Ac-AVATATGAGGAAGQR  
01:9606|40826|0#NP\_001258613|SLC35A3|Homo\_sapiens  
01:9606|40826|0#NP\_001258614|SLC35A3|Homo\_sapiens  
01:9606|40826|0#NP\_036375|SLC35A3|Homo\_sapiens  
01:9606|40826|NM\_001271684|SLC35A3|Homo\_sapiens  
01:9606|40826|NM\_001271685|SLC35A3|Homo\_sapiens  
01:9606|40826|NM\_012243|SLC35A3|Homo\_sapiens  
04:9913|40826|NM\_001105386|SLC35A3|Bos\_taurus  
05:9615|40826|NM\_001003385|SLC35A3|Canis\_lupus\_familiaris  
06:10116|40826|NM\_001012082|Slc35a3|Rattus\_norvegicus  
07:10090|40826|NM\_144902|Slc35a3|Mus\_musculus  
08:9031|40826|NM\_001031274|SLC35A3|Gallus\_gallus  
08:9031|40826|NM\_001031274|SLC35A3|Gallus\_gallus  
09:8364|40826|NM\_203767|slc35a3.2|Xenopus\_tropicalis  
13:6239|40826|NM\_061322|nstp-4|Caenorhabditis\_elegans

-----  
QFVGLMAVLTACFSSGFAGVYFEKILKETKQSVWIRNIQLVSFSLEPSL-----  
QFVGLMAVLTACFSSGFAGVYFEKILKETKQSVWIRNIQLGFFGSIFGLMGVYIYDGELV  
QFVGLMAVLTACFSSGFAGVYFEKILKETKQSVWIRNIQLGFFGSIFGLMGVYIYDGELV  
QFVGLMAVLTACFSSGFAGVYFEKILKETKQSVWIRNIQLVSFSLEPSL-----  
QFVGLMAVLTACFSSGFAGVYFEKILKETKQSVWIRNIQLGFFGSIFGLMGVYIYDGELV  
QFVGLMAVLTACFSSGFAGVYFEKILKETKQSVWIRNIQLGFFGSIFGLMGVYIYDGELV  
QFVGLMAVLTACFSSGFAGVYFEKILKETKQSVWIRNIQLGFFGSIFGLMGVYIYDGELV  
QFVGLMAVLTACFSSGFAGVYFEKILKETKQSVWIRNIQLGFFGSIFGLMGVYIYDGELV  
QFVGLMAVLTACFSSGFAGVYFEKILKETKQSVWIRNIQLGFFGSIFGLMGVYIYDGELV  
QFVGLMAVLTACFSSGFAGVYFEKILKETKQSVWIRNIQLGFFGSIFGLMGVYIYDGEQL  
QFVGLMAVLTACFSSGFAGVYFEKILKETKQSVWIRNIQLGFFGSIFGLMGVYIYDGEQL  
GFVGLMAVLTACFSSGFAGVYFEKILKETKQSVWIRNIQLGFFGWIFGLMGVYIYDGERV  
NILGLGAVLAACFSSGFAGVYFEKILKTSKVSLWIRNIQLAFFSVFGALLVCWLVDWQAI

-----  
SKNGFFQGYNRLTWIVVVLQALGGLVIAAVIKYADNILKGFATSLSIILSTLISYFWLQD  
SKNGFFQGYNRLTWIVVVLQALGGLVIAAVIKYADNILKGFATSLSIILSTLISYFWLQD  
-----  
SKNGFFQGYNRLTWIVVVLQALGGLVIAAVIKYADNILKGFATSLSIILSTLISYFWLQD  
SKNGFFQGYNRLTWIVVVLQALGGLVIAAVIKYADNILKGFATSLSIILSTLISYFWLQD  
SKNGFFQGYNRLTWIVVVLQALGGLVIAAVIKYADNILKGFATSLSIILSTLISYFWLQD  
SKNGFFQGYNRLTWIVVVLQALGGLVIAAVIKYADNILKGFATSLSIILSTLISYFWLQD  
SKNGFFQGYNQLTWIVVVLQALGGLVIAAVIKYADNILKGFATSLSIILSTIISYFWLQD  
SKNGFFQGYNQLTWIVVVALQALGGLVIAAVIKYADNILKGFATSLSIILSTIISYFWLQD  
SEDGFFQGYNKLTWIVCSTGTWRPGDC-CCYKICRQHFKGICNFSLYYTFNIDLLFLASG  
SEDGFFQGYNKLTWIVVVLQALGGLVIAAVIKYADNILKGFATSLSIILSTLISYFWLQD  
SNGGFFQGYNNLTWAVVALQALGGLVIAAVIKYADNILKGFATSLSIILSTLISYFWLQD  
SDDGFLRGYNGVIWIVVLLQAYGGLVIALVVKYADNILKGFVLSLSIILSSFTSWLVLGD

-----  
FVPTSVFFLGAILVITATFLYGYDPKPAGNPTKA-  
FVPTSVFFLGAILVITATFLYGYDPKPAGNPTKA-  
-----  
FVPTSVFFLGAILVITATFLYGYDPKPAGNPTKA-  
FVPTSVFFLGAILVITATFLYGYDPKPAGNPTKA-  
FVPTSVFFLGAILVITATFLYGYDPKPAGNPTKA-  
FVPTSVFFLGAILVIAATFLYGYDPKPAGNPTKA-  
FVPTSVFFLGAILVIAATFLYGYDPKPAGNPTKA-  
FVPTSVFFFGAILVIAATFLYGYDPKPAGNPTKA-  
FVPTSVFFFGAILVIAATFLYGYDPKPAGNPTKA-  
FVPTSVFFVFGALLVIAATFLYGYVVPKPAANPIKA-  
LTITTTFAIGATVVIFATFLYGHEPKSTPAEAHNA

***ABLIM1***

Ac-MEEFSAQHSQGTELEEKEPWPEAGDKHYHPSCAR

CLUSTAL O(1.2.1) multiple sequence alignment

```
00:1|Ac-MEEFSAQHSQGTELEEKEPWPPEAGDKHYHPSCAR
01:9606|40994|0#NP_001003407|ABLIIM1|Homo_sapiens
01:9606|40994|0#NP_001003408|ABLIIM1|Homo_sapiens
01:9606|40994|0#NP_002304|ABLIIM1|Homo_sapiens
01:9606|40994|0#NP_006711|ABLIIM1|Homo_sapiens
01:9606|40994|NM_001003407|ABLIIM1|Homo_sapiens
01:9606|40994|NM_001003408|ABLIIM1|Homo_sapiens
01:9606|40994|NM_002313|ABLIIM1|Homo_sapiens
01:9606|40994|NM_006720|ABLIIM1|Homo_sapiens
06:10116|40994|NM_001044394|Ablim1|Rattus_norvegicus
07:10090|40994|NM_001103177|Ablim1|Mus_musculus
07:10090|40994|NM_001103178|Ablim1|Mus_musculus
07:10090|40994|NM_001290813|Ablim1|Mus_musculus
07:10090|40994|NM_001290815|Ablim1|Mus_musculus
07:10090|40994|NM_001290816|Ablim1|Mus_musculus
07:10090|40994|NM_178688|Ablim1|Mus_musculus
08:9031|40994|NM_001159363|ABLIIM1|Gallus_gallus
10:7955|40994|NM_001114316|ablim1a|Danio_rerio
```

```
00:1|Ac-MEEFSAQHSQGTELEEKEPWPPEAGDKHYHPSCAR
01:9606|40994|0#NP_001003407|ABLIIM1|Homo_sapiens
01:9606|40994|0#NP_001003408|ABLIIM1|Homo_sapiens
01:9606|40994|0#NP_002304|ABLIIM1|Homo_sapiens
01:9606|40994|0#NP_006711|ABLIIM1|Homo_sapiens
01:9606|40994|NM_001003407|ABLIIM1|Homo_sapiens
01:9606|40994|NM_001003408|ABLIIM1|Homo_sapiens
01:9606|40994|NM_002313|ABLIIM1|Homo_sapiens
01:9606|40994|NM_006720|ABLIIM1|Homo_sapiens
06:10116|40994|NM_001044394|Ablim1|Rattus_norvegicus
07:10090|40994|NM_001103177|Ablim1|Mus_musculus
07:10090|40994|NM_001103178|Ablim1|Mus_musculus
07:10090|40994|NM_001290813|Ablim1|Mus_musculus
07:10090|40994|NM_001290815|Ablim1|Mus_musculus
07:10090|40994|NM_001290816|Ablim1|Mus_musculus
07:10090|40994|NM_178688|Ablim1|Mus_musculus
08:9031|40994|NM_001159363|ABLIIM1|Gallus_gallus
10:7955|40994|NM_001114316|ablim1a|Danio_rerio
```

```
00:1|Ac-MEEFSAQHSQGTELEEKEPWPPEAGDKHYHPSCAR
01:9606|40994|0#NP_001003407|ABLIIM1|Homo_sapiens
01:9606|40994|0#NP_001003408|ABLIIM1|Homo_sapiens
01:9606|40994|0#NP_002304|ABLIIM1|Homo_sapiens
01:9606|40994|0#NP_006711|ABLIIM1|Homo_sapiens
01:9606|40994|NM_001003407|ABLIIM1|Homo_sapiens
01:9606|40994|NM_001003408|ABLIIM1|Homo_sapiens
01:9606|40994|NM_002313|ABLIIM1|Homo_sapiens
01:9606|40994|NM_006720|ABLIIM1|Homo_sapiens
06:10116|40994|NM_001044394|Ablim1|Rattus_norvegicus
07:10090|40994|NM_001103177|Ablim1|Mus_musculus
07:10090|40994|NM_001103178|Ablim1|Mus_musculus
07:10090|40994|NM_001290813|Ablim1|Mus_musculus
07:10090|40994|NM_001290815|Ablim1|Mus_musculus
07:10090|40994|NM_001290816|Ablim1|Mus_musculus
07:10090|40994|NM_178688|Ablim1|Mus_musculus
08:9031|40994|NM_001159363|ABLIIM1|Gallus_gallus
10:7955|40994|NM_001114316|ablim1a|Danio_rerio
```

```
00:1|Ac-MEEFSAQHSQGTELEEKEPWPPEAGDKHYHPSCAR
01:9606|40994|0#NP_001003407|ABLIIM1|Homo_sapiens
01:9606|40994|0#NP_001003408|ABLIIM1|Homo_sapiens
01:9606|40994|0#NP_002304|ABLIIM1|Homo_sapiens
01:9606|40994|0#NP_006711|ABLIIM1|Homo_sapiens
01:9606|40994|NM_001003407|ABLIIM1|Homo_sapiens
01:9606|40994|NM_001003408|ABLIIM1|Homo_sapiens
01:9606|40994|NM_002313|ABLIIM1|Homo_sapiens
01:9606|40994|NM_006720|ABLIIM1|Homo_sapiens
06:10116|40994|NM_001044394|Ablim1|Rattus_norvegicus
07:10090|40994|NM_001103177|Ablim1|Mus_musculus
07:10090|40994|NM_001103178|Ablim1|Mus_musculus
07:10090|40994|NM_001290813|Ablim1|Mus_musculus
07:10090|40994|NM_001290815|Ablim1|Mus_musculus
07:10090|40994|NM_001290816|Ablim1|Mus_musculus
07:10090|40994|NM_178688|Ablim1|Mus_musculus
08:9031|40994|NM_001159363|ABLIIM1|Gallus_gallus
10:7955|40994|NM_001114316|ablim1a|Danio_rerio
```

```
00:1|Ac-MEEFSAQHSQGTELEEKEPWPPEAGDKHYHPSCAR
01:9606|40994|0#NP_001003407|ABLIIM1|Homo_sapiens
01:9606|40994|0#NP_001003408|ABLIIM1|Homo_sapiens
```

```

QLCAQPMSSSPKET-----TFSSNCAGCGRDIKNGQALLALDKQWHLGCFCKKSC
-----
QLCAQPMSSSPKET-----TFSSNCAGCGRDIKNGQALLALDKQWHLGCFCKKSC
QLCAQPMSSSPKET-----TFSSNCAGCGRDIKNGQALLALDKQWHLGCFCKKSC
QLCAQPMSSSPKET-----TFSSNCAGCGRDIKNGQALLALDKQWHLGCFCKKSC
-----
QLCAQPMSSSPKEA-----SCSSNCAGCGRDIKNGQALLALDKQWHLGCFCKKSC
-----
QLCAQPMSSSPKEA-----SCSSNCAGCGRDIKNGQALLALDKQWHLGCFCKKSC
QLCAQPMSSSPKEA-----SCSSNCAGCGRDIKNGQALLALDKQWHLGCFCKKSC
QLCAQPMSSSPKEA-----SCSSNCAGCGRDIKNGQALLALDKQWHLGCFCKKSC
QLCAQPMSSSPKEA-----SCSSNCAGCGRDIKNGQALLALDKQWHLGCFCKKSC
QLCAQPMSSSPKEL-----SASSNCAGCGRDIKNGQALLALDKQWHLGCFCKKAC
QYCAEPMSPGPTKDVVGPSSSEYEKNSKSCAGCGRDIKNGQALLALERQWHLGCFCKKAC

```

```

-----MEEFS---AQH-----SQGTELEKEEPWEAGDKHYHPSCA
GKVLGTGEYISKDGAPYCEKDYGQLFGVK-----CEACHQFITGKVLEAGDKHYHPSCA
GKVLGTGEYISKDGAPYCEKDYGQLFGVK-----CEACHQFITGKVLEAGDKHYHPSCA
GKVLGTGEYISKDGAPYCEKDYQGLFGVK-----CEACHQFITGKVLEAGDKHYHPSC
-----
GKVLGTGEYISKDGAPYCEKDYQGLFGVK-----CEACHQFITGKVLEAGDKHYHPSCA
GKVLGTGEYISKDGAPYCEKDYQGLFGVK-----CEACHQFITGKVLEAGDKHYHPSCA
GKVLGTGEYISKDGAPYCEKDYGQLFGVK-----CEACHQFITGKVLEAGDKHYHPSCA
-----SLEEFAQH-----SQGTELEKEEPWEAGDKHYHPSCA
-----AGNPEEFCPGBELNRIRFPGWQKAGDKHYHPSCA
GKVLGTGEYISKDGSPYCEKDYGQLFGVK-----CEACHQFITGKVLEAGDKHYHPSCA
-----HVQGLVSWQLREVLPRRAKQDQTGPWHKAGDKHYHPSCA
GKVLGTGEYISKDGSPYCEKDYGQLFGVK-----CEACHQFITGKVLEAGDKHYHPSCA
GKVLGTGEYISKDGSPYCEKDYGQLFGVK-----CEACHQFITGKVLEAGDKHYHPSCA
GKVLGTGEYISKDGSPYCEKDYGQLFGVK-----CEACHQFITGKVLEAGDKHYHPSCA
GKVLGTGEYISKDGSPYCEKDYGQLFGVK-----CEACHQFITGKVLEAGDKHYHPSCA
GKVLGTGEYISKDGAPYCEKDYGQLFGVK-----CEACHQFITGKVLEAGDKHYHPSCA
AKVLGTGEYISKDGAFFCERDYLQVPGVQ-----CEACQOFITGKVLEAGDKHYHPSCA

```

[illegible]

```
-----RPTRTSSESIYSRPGSSIPGSPGHITTIYAKVDNEILDYKD
-----IRRTGRSPS----LQPTRTSSESIYSRPGSSIPGSPGHITTIYAKVDNEILDYKD
-----RPTRTSSESIYSRPGSSIPGSPGHITTIYAKVDNEILDYKD
-----IRRTGRSPS----LQPTRTSSESIYSRPGSSIPGSPGHITTIYAKVDNEILDYKD
-----RPTRTSSESIYSRPGSSIPGSPGHITTIYAKVDNEILDYKD
-----IRRTGRSPS----LQPTRTSSESIYSRPGSSIPGSPGHITTIYAKVDNEILDYKD
-----RPTRTSSESIYSRPGSSIPGSPGHITTIYAKVDNEILDYKD
-----IRRTGRSPS----LQPTRTSSESIYSRPGSSIPGSPGHITTIYAKVDNEILDYKD
-----RPTRTSSESIYSRPGSSIPGSPGHITTIYAKVDNEILDYKD
-----IRRTGRSPS----LQPTRTSSESIYSRPGSSIPGSPGHITTIYAKVDNEILDYKD
-----TTRTSSESIYSRPGSSIPGSPGHITTIYAKVDNEILDYKD
-----RPTRTSSESIYSRPGSSIPGSPGHITTIYAKVDNEILDYKD
RSPALQLLSPCLMNSNKNPRQPTRTSSESIYSRPGSSIPGSPGHITTIYAKVDNEILDYKD
-----TTRTSSESIYSRPGSSIPGSPGHITTIYAKVDNEILDYKD
-----RPTRTSSESIYSRPGSSIPGSPGHITTIYAKVDNEILDYKD
-----TTRTSSESIYSRPGSSIPGSPGHITTIYAKVDNEILDYKD
RSPALQLLSPCLMNSNKNPRQPTRTSSESIYSRPGSSIPGSPGHITTIYAKVDNEILDYKD
-----VLRPRSAELLFVFQPTRTSSESIYSRPGSSIPGSPGHITTIYAKVDNEILDYKD
-----RPTRSSESIICSRPSSIPSGPGHITTIYAKVDNEILDYD
```

[illegible]





***METTL9***

Ac-METGAGGSGVPRPEGKGEVPR





*GNPNAT1*

Ac-ALKPDPDPVLCTLVGESPTR

[illegible]

```

001:1|Ac-ALKPDDPVLCTLVGESPTR
01:9606|41323|0#NP_932332|GNPNAT1|Homo_sapiens
01:9606|41323|NM_198066|GNPNAT1|Homo_sapiens
03:9544|41323|NM_001260699|GNPNAT1|Macaca_mulatta
04:9913|41323|NM_001075559|GNPNAT1|Bos_taurus
06:10116|41323|NM_001134756|Gnpnat1|Rattus_norvegicus
06:10116|41323|NM_001134757|Gnpnat1|Rattus_norvegicus
07:10950|41323|NM_019425|Gnpnat1|Mus_musculus
10:7955|41323|NM_001024374|gnpnat1|Danio_rerio
12:7227|41323|NM_001260431|CG1969|Drosophila_melanogaster
12:7227|41323|NM_001260432|CG1969|Drosophila_melanogaster
12:7227|41323|NM_001276150|CG1969|Drosophila_melanogaster
12:7227|41323|NM_001276151|CG1969|Drosophila_melanogaster
12:7227|41323|NM_001276152|CG1969|Drosophila_melanogaster
12:7227|41323|NM_143462|CG1969|Drosophila_melanogaster
12:7227|41323|NM_170422|CG1969|Drosophila_melanogaster
13:6239|41323|NM_059743|gna-2|Caenorhabditis_elegans
13:6239|41323|NM_073253|gna-1|Caenorhabditis_elegans
15:3702|41323|NM_121582|GNA1|Arabidopsis_thaliana

```

[illegible]

*SH3BGRL3*

Ac-AAASSPGSAAAATAALCPPAR

CLUSTAL O(1.2.1) multiple sequence alignment

|                                                        |                                                               |
|--------------------------------------------------------|---------------------------------------------------------------|
| 00:1 Ac-AAASSPGSAAAATAALCPPAR                          | -----                                                         |
| 01:9606 41824 0#NP_112576 SH3BGRL3 Homo_sapiens        | -----                                                         |
| 01:9606 41824 NM_031286 SH3BGRL3 Homo_sapiens          | ERAALVAGELDAPNLCAAGEGFCQTLSRACPATQAPPQSHTELQIREGPKRTIRAAAEG   |
| 04:9913 41824 NM_001034763 SH3BGRL3 Bos_taurus         | -----                                                         |
| 06:10116 41824 NM_001106688 Sh3bgrl3 Rattus_norvegicus | -----                                                         |
| 07:10090 41824 NM_080559 Sh3bgrl3 Mus_musculus         | -----                                                         |
| 08:9031 41824 NM_001302096 SH3BGRL3 Gallus_gallus      | -----                                                         |
| 09:8364 41824 NM_001103044 sh3bgrl3 Xenopus_tropicalis | -----                                                         |
| 10:7955 41824 NM_200278 sh3bgrl3 Danio_rerio           | -----                                                         |
| 10:7955 41824 NM_200278 sh3bgrl3 Danio_rerio           | -----                                                         |
| 00:1 Ac-AAASSPGSAAAATAALCPPAR                          | -----AA                                                       |
| 01:9606 41824 0#NP_112576 SH3BGRL3 Homo_sapiens        | -----                                                         |
| 01:9606 41824 NM_031286 SH3BGRL3 Homo_sapiens          | APCVGRVRCAPGNRGGREGASGVRGVAVPPRLPAPPIGPERDDLAGGAGRKLPLSTAA    |
| 04:9913 41824 NM_001034763 SH3BGRL3 Bos_taurus         | -----                                                         |
| 06:10116 41824 NM_001106688 Sh3bgrl3 Rattus_norvegicus | -----                                                         |
| 07:10090 41824 NM_080559 Sh3bgrl3 Mus_musculus         | -----                                                         |
| 08:9031 41824 NM_001302096 SH3BGRL3 Gallus_gallus      | -----                                                         |
| 09:8364 41824 NM_001103044 sh3bgrl3 Xenopus_tropicalis | -----                                                         |
| 10:7955 41824 NM_200278 sh3bgrl3 Danio_rerio           | -----GSGSRH--S--GTVSED-----CM-----RAKPGSIN                    |
| 10:7955 41824 NM_200278 sh3bgrl3 Danio_rerio           | -----                                                         |
| 00:1 Ac-AAASSPGSAAAATAALCPPAR                          | A---SSPGSAAAATAALCPPAR-----                                   |
| 01:9606 41824 0#NP_112576 SH3BGRL3 Homo_sapiens        | -----MSGLRVYSTSVTGSREIKSQQSEVTRILDGKRI                        |
| 01:9606 41824 NM_031286 SH3BGRL3 Homo_sapiens          | A---SSPGSAAAATAALCPPARLSTPSMSGRLRVYSTSVTGSREIKSQQSEVTRILDGKRI |
| 04:9913 41824 NM_001034763 SH3BGRL3 Bos_taurus         | -----AVQLLPPPSVCLPSRRSTRMSGRLRVYSTSVTGSREIKSQQSEVTRILDGKRI    |
| 06:10116 41824 NM_001106688 Sh3bgrl3 Rattus_norvegicus | -----FLAVQLPLPPSL-SWSLSPACSMGSLRVYSTSVTGSREIKSQQSEVTRILDGKRI  |
| 07:10090 41824 NM_080559 Sh3bgrl3 Mus_musculus         | -----FLAVQLPLPPSL-SWSVSPACSMGSLRVYSTSVTGSREIKSQQSEVTRILDGKRI  |
| 08:9031 41824 NM_001302096 SH3BGRL3 Gallus_gallus      | -----LPPPGLCAGSG-RGRSMSTLKVYSTSVTGSREIKSQQSEVTRILDGKNI        |
| 09:8364 41824 NM_001103044 sh3bgrl3 Xenopus_tropicalis | -----GRKYCCRVISRLELRMVVKVYYTSVTGSREIKSQQSEITRILDSKCI          |
| 10:7955 41824 NM_200278 sh3bgrl3 Danio_rerio           | ILFPSLVHVHIPKGRPACHPLLRW-RRLPSLS-----QCHATCQKQSTEKHIFN----    |
| 10:7955 41824 NM_200278 sh3bgrl3 Danio_rerio           | -----SPQKHKGTSPTSSTMSIKLYYTTVTASREVKSQQAQEVMRILESKSI          |
| 00:1 Ac-AAASSPGSAAAATAALCPPAR                          | -----                                                         |
| 01:9606 41824 0#NP_112576 SH3BGRL3 Homo_sapiens        | QYQLVDISQDNALRDEMRLAGNPKATPPQIVNG-----DQYCGDYELFVEAVEQNTLQ    |
| 01:9606 41824 NM_031286 SH3BGRL3 Homo_sapiens          | QYQLVDISQDNALRDEMRLAGNPKATPPQIVNG-----DQYCGDYELFVEAVEQNTLQ    |
| 04:9913 41824 NM_001034763 SH3BGRL3 Bos_taurus         | QYQLVDISQDNALRDEMRLAGNPKATPPQIVNG-----DQYCGDYELFVEAVEQNTLQ    |
| 06:10116 41824 NM_001106688 Sh3bgrl3 Rattus_norvegicus | QYQLVDISQDNALRDEMRTLAGNPKATPPQIVNG-----DHYCGDYELFVEAVEQNTLQ   |
| 07:10090 41824 NM_080559 Sh3bgrl3 Mus_musculus         | QYQLVDISQDNALRDEMRTLAGNPKATPPQIVNG-----NHYCGDYELFVEAVEQDRTLQ  |
| 08:9031 41824 NM_001302096 SH3BGRL3 Gallus_gallus      | KYELVDISQDNALREEMRAKAGNPKAIPPQIVNG-----DHYCGDYELFVEAVEQNTLQ   |
| 09:8364 41824 NM_001103044 sh3bgrl3 Xenopus_tropicalis | KYETVDISADNNIRTEMQMCGNPNAFPQIFND-----DQYCGDYEQFAAAVEDEILS     |
| 10:7955 41824 NM_200278 sh3bgrl3 Danio_rerio           | -----SRPPHITSIKHTLTHLIFCVVYFDYLNYS--LVS                       |
| 10:7955 41824 NM_200278 sh3bgrl3 Danio_rerio           | RYELIDISVGAIRDEMRSKSGNPATIPPQIFNE-----DQYCGNYEMFTEAVEADTVE    |
| 00:1 Ac-AAASSPGSAAAATAALCPPAR                          | -----                                                         |
| 01:9606 41824 0#NP_112576 SH3BGRL3 Homo_sapiens        | EF-LKLA--                                                     |
| 01:9606 41824 NM_031286 SH3BGRL3 Homo_sapiens          | EF-LKLA--                                                     |
| 04:9913 41824 NM_001034763 SH3BGRL3 Bos_taurus         | EF-LKLA--                                                     |
| 06:10116 41824 NM_001106688 Sh3bgrl3 Rattus_norvegicus | EF-LKLA--                                                     |
| 07:10090 41824 NM_080559 Sh3bgrl3 Mus_musculus         | EF-LKLA--                                                     |
| 08:9031 41824 NM_001302096 SH3BGRL3 Gallus_gallus      | EF-LKLA--                                                     |
| 09:8364 41824 NM_001103044 sh3bgrl3 Xenopus_tropicalis | QF-LKLA--                                                     |
| 10:7955 41824 NM_200278 sh3bgrl3 Danio_rerio           | SLILMLERH                                                     |
| 10:7955 41824 NM_200278 sh3bgrl3 Danio_rerio           | QF-LKIA--                                                     |

*TP53*

Ac-MLPWIGSQTAFR

|                      |     |                                          |                                                              |  |  |
|----------------------|-----|------------------------------------------|--------------------------------------------------------------|--|--|
| 00:1 Ac-MLPWIGSQTAFR |     |                                          | -----MLPWIGS-QTAFR-----                                      |  |  |
| 01:9606              | 460 | 0#NP_000537 TP53 Homo_sapiens            | -----MEEPQSDPS-----VEPPL                                     |  |  |
| 01:9606              | 460 | 0#NP_001119584 TP53 Homo_sapiens         | -----MEEPQSDPS-----VEPPL                                     |  |  |
| 01:9606              | 460 | 0#NP_001119585 TP53 Homo_sapiens         | -----MEEPQSDPS-----VEPPL                                     |  |  |
| 01:9606              | 460 | 0#NP_001119586 TP53 Homo_sapiens         | -----MEEPQSDPS-----VEPPL                                     |  |  |
| 01:9606              | 460 | 0#NP_001119587 TP53 Homo_sapiens         | -----                                                        |  |  |
| 01:9606              | 460 | 0#NP_001119588 TP53 Homo_sapiens         | -----                                                        |  |  |
| 01:9606              | 460 | 0#NP_001119589 TP53 Homo_sapiens         | -----                                                        |  |  |
| 01:9606              | 460 | 0#NP_001119590 TP53 Homo_sapiens         | -----                                                        |  |  |
| 01:9606              | 460 | 0#NP_001263624 TP53 Homo_sapiens         | -----                                                        |  |  |
| 01:9606              | 460 | 0#NP_001263625 TP53 Homo_sapiens         | -----                                                        |  |  |
| 01:9606              | 460 | 0#NP_001263626 TP53 Homo_sapiens         | -----                                                        |  |  |
| 01:9606              | 460 | 0#NP_001263627 TP53 Homo_sapiens         | -----                                                        |  |  |
| 01:9606              | 460 | 0#NP_001263628 TP53 Homo_sapiens         | -----                                                        |  |  |
| 01:9606              | 460 | 0#NP_001263689 TP53 Homo_sapiens         | -----                                                        |  |  |
| 01:9606              | 460 | 0#NP_001263690 TP53 Homo_sapiens         | -----                                                        |  |  |
| 01:9606              | 460 | NM_000546 TP53 Homo_sapiens              | LLGSGDTLRSGWERAFAHDGDTLPWIGS-QTAFRVTAMEEPQSDPS-----VEPPL     |  |  |
| 01:9606              | 460 | NM_001126112 TP53 Homo_sapiens           | LLGSGDTLRSGWERAFAHDGDTLPWIG--QTAFRVTAMEEPQSDPS-----VEPPL     |  |  |
| 01:9606              | 460 | NM_001126113 TP53 Homo_sapiens           | LLGSGDTLRSGWERAFAHDGDTLPWIGS-QTAFRVTAMEEPQSDPS-----VEPPL     |  |  |
| 01:9606              | 460 | NM_001126114 TP53 Homo_sapiens           | LLGSGDTLRSGWERAFAHDGDTLPWIGS-QTAFRVTAMEEPQSDPS-----VEPPL     |  |  |
| 01:9606              | 460 | NM_001126115 TP53 Homo_sapiens           | -----                                                        |  |  |
| 01:9606              | 460 | NM_001126116 TP53 Homo_sapiens           | -----                                                        |  |  |
| 01:9606              | 460 | NM_001126117 TP53 Homo_sapiens           | -----                                                        |  |  |
| 01:9606              | 460 | NM_001126118 TP53 Homo_sapiens           | -----VDPLEGQAHHHPNPNSPLAETCGKRKF                             |  |  |
| 01:9606              | 460 | NM_001276695 TP53 Homo_sapiens           | LLGSGDTLRSGWERAFAHDGDTLPWIGS-QTAFRVTAMEEPQSDPS-----VEPPL     |  |  |
| 01:9606              | 460 | NM_001276696 TP53 Homo_sapiens           | LLGSGDTLRSGWERAFAHDGDTLPWIGS-QTAFRVTAMEEPQSDPS-----VEPPL     |  |  |
| 01:9606              | 460 | NM_001276697 TP53 Homo_sapiens           | -----                                                        |  |  |
| 01:9606              | 460 | NM_001276698 TP53 Homo_sapiens           | -----                                                        |  |  |
| 01:9606              | 460 | NM_001276699 TP53 Homo_sapiens           | -----                                                        |  |  |
| 01:9606              | 460 | NM_001276760 TP53 Homo_sapiens           | LLGSGDTLRSGWERAFAHDGDTLPWIGS-QTAFRVTAMEEPQSDPS-----VEPPL     |  |  |
| 01:9606              | 460 | NM_001276761 TP53 Homo_sapiens           | LLGSGDTLRSGWERAFAHDGDTLPWIGQ--TAFRTVAMEEPQSDPS-----VEPPL     |  |  |
| 03:9544              | 460 | NM_001047151 TP53 Macaca_mulatta         | -----HASLRIGS-QTALRVTAMEEPQSDPS-----IEPPL                    |  |  |
| 04:9913              | 460 | NM_174201 TP53 Bos_taurus                | -----HPPLSFGGHTTFQGATMEESQAELNVEPPL                          |  |  |
| 05:9615              | 460 | NM_001003210 TP53 Canis_lupus_familiaris | -----VPVTAMEESQSE-----LNIDPPL                                |  |  |
| 06:10116             | 460 | NM_030989 Tp53 Rattus_norvegicus         | -----GVPGIRA-RTLLPSRVSRSPEDWITVMEDSQSDMSIELPL                |  |  |
| 07:10090             | 460 | NM_001127233 Trp53 Mus_musculus          | -----GAPSIQALILLPSRVSRFSEDWMTAMEESQSDISLELPL                 |  |  |
| 07:10090             | 460 | NM_011640 Trp53 Mus_musculus             | -----GAPSIQALILLPSRVSRFSEDWMTAMEESQSDISLELPL                 |  |  |
| 09:8364              | 460 | NM_001001903 tp53 Xenopus_tropicalis     | -----SGS-AMEPSSETGMPEPL                                      |  |  |
| 10:7955              | 460 | NM_001271820 tp53 Danio_rerio            | -----FSGEEVGKINSCK-----AMAQN                                 |  |  |
| 10:7955              | 460 | NM_131327 tp53 Danio_rerio               | -----FSGEEVGKINSCK-----AMAQN                                 |  |  |
|                      |     |                                          |                                                              |  |  |
| 00:1 Ac-MLPWIGSQTAFR |     |                                          | -----                                                        |  |  |
| 01:9606              | 460 | 0#NP_000537 TP53 Homo_sapiens            | SQETFSDLWKLLPENNVLSPLPSQA--MDDL---MLSPD----DIEQWFTEDPGPDEA   |  |  |
| 01:9606              | 460 | 0#NP_001119584 TP53 Homo_sapiens         | SQETFSDLWKLLPENNVLSPLPSQA--MDDL---MLSPD----DIEQWFTEDPGPDEA   |  |  |
| 01:9606              | 460 | 0#NP_001119585 TP53 Homo_sapiens         | SQETFSDLWKLLPENNVLSPLPSQA--MDDL---MLSPD----DIEQWFTEDPGPDEA   |  |  |
| 01:9606              | 460 | 0#NP_001119586 TP53 Homo_sapiens         | SQETFSDLWKLLPENNVLSPLPSQA--MDDL---MLSPD----DIEQWFTEDPGPDEA   |  |  |
| 01:9606              | 460 | 0#NP_001119587 TP53 Homo_sapiens         | -----                                                        |  |  |
| 01:9606              | 460 | 0#NP_001119588 TP53 Homo_sapiens         | -----                                                        |  |  |
| 01:9606              | 460 | 0#NP_001119589 TP53 Homo_sapiens         | -----                                                        |  |  |
| 01:9606              | 460 | 0#NP_001119590 TP53 Homo_sapiens         | -----MDDL---MLSPD----DIEQWFTEDPGPDEA                         |  |  |
| 01:9606              | 460 | 0#NP_001263624 TP53 Homo_sapiens         | -----MDDL---MLSPD----DIEQWFTEDPGPDEA                         |  |  |
| 01:9606              | 460 | 0#NP_001263625 TP53 Homo_sapiens         | -----MDDL---MLSPD----DIEQWFTEDPGPDEA                         |  |  |
| 01:9606              | 460 | 0#NP_001263626 TP53 Homo_sapiens         | -----                                                        |  |  |
| 01:9606              | 460 | 0#NP_001263627 TP53 Homo_sapiens         | -----                                                        |  |  |
| 01:9606              | 460 | 0#NP_001263628 TP53 Homo_sapiens         | -----                                                        |  |  |
| 01:9606              | 460 | 0#NP_001263689 TP53 Homo_sapiens         | -----MDDL---MLSPD----DIEQWFTEDPGPDEA                         |  |  |
| 01:9606              | 460 | 0#NP_001263690 TP53 Homo_sapiens         | -----MDDL---MLSPD----DIEQWFTEDPGPDEA                         |  |  |
| 01:9606              | 460 | NM_000546 TP53 Homo_sapiens              | SQETFSDLWKLLPENNVLSPLPSQA--MDDL---MLSPD----DIEQWFTEDPGPDEA   |  |  |
| 01:9606              | 460 | NM_001126112 TP53 Homo_sapiens           | SQETFSDLWKLLPENNVLSPLPSQA--MDDL---MLSPD----DIEQWFTEDPGPDEA   |  |  |
| 01:9606              | 460 | NM_001126113 TP53 Homo_sapiens           | SQETFSDLWKLLPENNVLSPLPSQA--MDDL---MLSPD----DIEQWFTEDPGPDEA   |  |  |
| 01:9606              | 460 | NM_001126114 TP53 Homo_sapiens           | SQETFSDLWKLLPENNVLSPLPSQA--MDDL---MLSPD----DIEQWFTEDPGPDEA   |  |  |
| 01:9606              | 460 | NM_001126115 TP53 Homo_sapiens           | SQETFSDLWKLLPENNVLSPLPSQA--MDDL---MLSPD----DIEQWFTEDPGPDEA   |  |  |
| 01:9606              | 460 | NM_001126116 TP53 Homo_sapiens           | -----                                                        |  |  |
| 01:9606              | 460 | NM_001126117 TP53 Homo_sapiens           | -----                                                        |  |  |
| 01:9606              | 460 | NM_001126118 TP53 Homo_sapiens           | HGTDFLLLSFRLPENNVLSPLPSQA--MDDL---MLSPD----DIEQWFTEDPGPDEA   |  |  |
| 01:9606              | 460 | NM_001276695 TP53 Homo_sapiens           | SQETFSDLWKLLPENNVLSPLPSQA--MDDL---MLSPD----DIEQWFTEDPGPDEA   |  |  |
| 01:9606              | 460 | NM_001276696 TP53 Homo_sapiens           | SQETFSDLWKLLPENNVLSPLPSQA--MDDL---MLSPD----DIEQWFTEDPGPDEA   |  |  |
| 01:9606              | 460 | NM_001276697 TP53 Homo_sapiens           | -----                                                        |  |  |
| 01:9606              | 460 | NM_001276698 TP53 Homo_sapiens           | -----                                                        |  |  |
| 01:9606              | 460 | NM_001276699 TP53 Homo_sapiens           | -----                                                        |  |  |
| 01:9606              | 460 | NM_001276760 TP53 Homo_sapiens           | SQETFSDLWKLLPENNVLSPLPSQA--MDDL---MLSPD----DIEQWFTEDPGPDEA   |  |  |
| 01:9606              | 460 | NM_001276761 TP53 Homo_sapiens           | SQETFSDLWKLLPENNVLSPLPSQA--MDDL---MLSPD----DIEQWFTEDPGPDEA   |  |  |
| 03:9544              | 460 | NM_001047151 TP53 Macaca_mulatta         | SQETFSDLWKLLPENNVLSPLPSQA--VDDL---MLSPD----DLAQWLTEDPGPDEA   |  |  |
| 04:9913              | 460 | NM_174201 TP53 Bos_taurus                | SQETFSDLWNLLPENNLLSSELSAP--VDD---LLPYT----DVATWLDEC--PNEA    |  |  |
| 05:9615              | 460 | NM_001003210 TP53 Canis_lupus_familiaris | SQETFSSELWNLLPENNVLSSELCPA--VDEL----L-LPE----SVVNWLDSDS--DDA |  |  |
| 06:10116             | 460 | NM_030989 Tp53 Rattus_norvegicus         | SQETFSCLWKLLPPDDILPTTATGSPNSMED---LFLPQ---DVAELLE--GPSEA     |  |  |
| 07:10090             | 460 | NM_001127233 Trp53 Mus_musculus          | SQETFSGLWKLLPPEDILPS----PHCMDD---LLLPQ---DVEEFFE--GPSEA      |  |  |
| 07:10090             | 460 | NM_011640 Trp53 Mus_musculus             | SQETFSGLWKLLPPEDILPS----PHCMDD---LLLPQ---DVEEFFE--GPSEA      |  |  |
| 09:8364              | 460 | NM_001001903 tp53 Xenopus_tropicalis     | SQETFEDLWSLLPDPLQTGTGQ-----ME-----NFAEFSEYPLAPD--            |  |  |
| 10:7955              | 460 | NM_001271820 tp53 Danio_rerio            | DSQEFAELWEKN----LISIQPPGGGSCWDIINDEEYLPGSFDPNFFENVLEEQQPQST- |  |  |
| 10:7955              | 460 | NM_131327 tp53 Danio_rerio               | DSQEFAELWEKN----LI-IQPPGGGSCWDIINDEEYLPGSFDPNFFENVLEEQQPQST- |  |  |





|          |     |                |       |                        |                                                              |
|----------|-----|----------------|-------|------------------------|--------------------------------------------------------------|
| 01:9606  | 460 | 0#NP_001119585 | TP53  | Homo_sapiens           | PHHELPPG-STKRALPNNTSS---SPQ-PKKK---PLDGEYFTLQMLDLRWCYFLINSS  |
| 01:9606  | 460 | 0#NP_001119586 | TP53  | Homo_sapiens           | PHHELPPG-STKRALPNNTSS---SPQ-PKKK---PLDGEYFTLQDQTSFQKENC----- |
| 01:9606  | 460 | 0#NP_001119587 | TP53  | Homo_sapiens           | PHHELPPG-STKRALPNNTSS---SPQ-PKKK---PLDGEYFTLQIRGRERFEMFRELNE |
| 01:9606  | 460 | 0#NP_001119588 | TP53  | Homo_sapiens           | PHHELPPG-STKRALPNNTSS---SPQ-PKKK---PLDGEYFTLQDQTSFQKENC----- |
| 01:9606  | 460 | 0#NP_001119589 | TP53  | Homo_sapiens           | PHHELPPG-STKRALPNNTSS---SPQ-PKKK---PLDGEYFTLQMLDLRWCYFLINSS  |
| 01:9606  | 460 | 0#NP_001119590 | TP53  | Homo_sapiens           | PHHELPPG-STKRALPNNTSS---SPQ-PKKK---PLDGEYFTLQIRGRERFEMFRELNE |
| 01:9606  | 460 | 0#NP_001263624 | TP53  | Homo_sapiens           | PHHELPPG-STKRALPNNTSS---SPQ-PKKK---PLDGEYFTLQMLDLRWCYFLINSS  |
| 01:9606  | 460 | 0#NP_001263625 | TP53  | Homo_sapiens           | PHHELPPG-STKRALPNNTSS---SPQ-PKKK---PLDGEYFTLQDQTSFQKENC----- |
| 01:9606  | 460 | 0#NP_001263626 | TP53  | Homo_sapiens           | PHHELPPG-STKRALPNNTSS---SPQ-PKKK---PLDGEYFTLQIRGRERFEMFRELNE |
| 01:9606  | 460 | 0#NP_001263627 | TP53  | Homo_sapiens           | PHHELPPG-STKRALPNNTSS---SPQ-PKKK---PLDGEYFTLQDQTSFQKENC----- |
| 01:9606  | 460 | 0#NP_001263628 | TP53  | Homo_sapiens           | PHHELPPG-STKRALPNNTSS---SPQ-PKKK---PLDGEYFTLQMLDLRWCYFLINSS  |
| 01:9606  | 460 | 0#NP_001263689 | TP53  | Homo_sapiens           | PHHELPPG-STKRALPNNTSS---SPQ-PKKK---PLDGEYFTLQIRGRERFEMFRELNE |
| 01:9606  | 460 | 0#NP_001263690 | TP53  | Homo_sapiens           | PHHELPPG-STKRALPNNTSS---SPQ-PKKK---PLDGEYFTLQIRGRERFEMFRELNE |
| 01:9606  | 460 | NM_000546      | TP53  | Homo_sapiens           | PHHELPPG-STKRALPNNTSS---SPQ-PKKK---PLDGEYFTLQIRGRERFEMFRELNE |
| 01:9606  | 460 | NM_001126112   | TP53  | Homo_sapiens           | PHHELPPG-STKRALPNNTSS---SPQ-PKKK---PLDGEYFTLQIRGRERFEMFRELNE |
| 01:9606  | 460 | NM_001126113   | TP53  | Homo_sapiens           | PHHELPPG-STKRALPNNTSS---SPQ-PKKK---PLDGEYFTLQMLDLRWCYFLINSS  |
| 01:9606  | 460 | NM_001126114   | TP53  | Homo_sapiens           | PHHELPPG-STKRALPNNTSS---SPQ-PKKK---PLDGEYFTLQDQTSFQKENC----- |
| 01:9606  | 460 | NM_001126115   | TP53  | Homo_sapiens           | PHHELPPG-STKRALPNNTSS---SPQ-PKKK---PLDGEYFTLQIRGRERFEMFRELNE |
| 01:9606  | 460 | NM_001126116   | TP53  | Homo_sapiens           | PHHELPPG-STKRALPNNTSS---SPQ-PKKK---PLDGEYFTLQDQTSFQKENC----- |
| 01:9606  | 460 | NM_001126117   | TP53  | Homo_sapiens           | PHHELPPG-STKRALPNNTSS---SPQ-PKKK---PLDGEYFTLQMLDLRWCYFLINSS  |
| 01:9606  | 460 | NM_001126118   | TP53  | Homo_sapiens           | PHHELPPG-STKRALPNNTSS---SPQ-PKKK---PLDGEYFTLQIRGRERFEMFRELNE |
| 01:9606  | 460 | NM_001276695   | TP53  | Homo_sapiens           | PHHELPPG-STKRALPNNTSS---SPQ-PKKK---PLDGEYFTLQMLDLRWCYFLINSS  |
| 01:9606  | 460 | NM_001276696   | TP53  | Homo_sapiens           | PHHELPPG-STKRALPNNTSS---SPQ-PKKK---PLDGEYFTLQDQTSFQKENC----- |
| 01:9606  | 460 | NM_001276697   | TP53  | Homo_sapiens           | PHHELPPG-STKRALPNNTSS---SPQ-PKKK---PLDGEYFTLQIRGRERFEMFRELNE |
| 01:9606  | 460 | NM_001276698   | TP53  | Homo_sapiens           | PHHELPPG-STKRALPNNTSS---SPQ-PKKK---PLDGEYFTLQDQTSFQKENC----- |
| 01:9606  | 460 | NM_001276699   | TP53  | Homo_sapiens           | PHHELPPG-STKRALPNNTSS---SPQ-PKKK---PLDGEYFTLQMLDLRWCYFLINSS  |
| 01:9606  | 460 | NM_001276760   | TP53  | Homo_sapiens           | PHHELPPG-STKRALPNNTSS---SPQ-PKKK---PLDGEYFTLQIRGRERFEMFRELNE |
| 01:9606  | 460 | NM_001276761   | TP53  | Homo_sapiens           | PHHELPPG-STKRALPNNTSS---SPQ-PKKK---PLDGEYFTLQIRGRERFEMFRELNE |
| 03:9544  | 460 | NM_001047151   | TP53  | Macaca_mulatta         | PCHQLPPG-STKRALPNNTSS---SPQ-PKKK---PLDGEYFTLQIRGRERFEMFRELNE |
| 04:9913  | 460 | NM_174201      | TP53  | Bos_taurus             | SCPEPPPR-STKRALPTNTSS---SPQ-PKKK---PLDGEYFTLQIRGFKRYEMFRELND |
| 05:9615  | 460 | NM_001003210   | TP53  | Canis_lupus_familiaris | PCPEPPPG-STKRALPSTSS---SPP-QKKK---PLDGEYFTLQIRGRERYEMFRNLNE  |
| 06:10116 | 460 | NM_030989      | TP53  | Rattus_norvegicus      | HCPELPPG-SAKRALPTSTSS---SPQ-QKKK---PLDGEYFTLQIRGRERFEMFRELNE |
| 07:10090 | 460 | NM_001127233   | Trp53 | Mus_musculus           | LCPELPPG-SAKRALPTCTSA---SPP-QKKK---PLDGEYFTLQIRGRKRFEMFRELNE |
| 07:10090 | 460 | NM_011640      | Trp53 | Mus_musculus           | LCPELPPG-SAKRALPTCTSA---SPP-QKKK---PLDGEYFTLQIRGRKRFEMFRELNE |
| 09:8364  | 460 | NM_001001903   | tp53  | Xenopus_tropicalis     | LKPN-----GKRELSHPPSS---DPPLPKKRLVEEDDEETLLIKGRSRYEMIKKLND    |
| 10:7955  | 460 | NM_001271820   | tp53  | Danio_rerio            | TKTMAKTTTGTGRSLVKESSSATLRPEGSKKAKGSSSDEEIFTLQVRGRERYEILKKLND |
| 10:7955  | 460 | NM_131327      | tp53  | Danio_rerio            | TKTMAKTTTGTGRSLVKESSSATLRPEGSKKAKGSSSDEEIFTLQVRGRERYEILKKLND |

  

|          |                 |                |       |                        |
|----------|-----------------|----------------|-------|------------------------|
| 00:1     | Ac-MLPWIGSQTAFR |                |       |                        |
| 01:9606  | 460             | 0#NP_000537    | TP53  | Homo_sapiens           |
| 01:9606  | 460             | 0#NP_001119584 | TP53  | Homo_sapiens           |
| 01:9606  | 460             | 0#NP_001119585 | TP53  | Homo_sapiens           |
| 01:9606  | 460             | 0#NP_001119586 | TP53  | Homo_sapiens           |
| 01:9606  | 460             | 0#NP_001119587 | TP53  | Homo_sapiens           |
| 01:9606  | 460             | 0#NP_001119588 | TP53  | Homo_sapiens           |
| 01:9606  | 460             | 0#NP_001119589 | TP53  | Homo_sapiens           |
| 01:9606  | 460             | 0#NP_001119590 | TP53  | Homo_sapiens           |
| 01:9606  | 460             | 0#NP_001263624 | TP53  | Homo_sapiens           |
| 01:9606  | 460             | 0#NP_001263625 | TP53  | Homo_sapiens           |
| 01:9606  | 460             | 0#NP_001263626 | TP53  | Homo_sapiens           |
| 01:9606  | 460             | 0#NP_001263627 | TP53  | Homo_sapiens           |
| 01:9606  | 460             | 0#NP_001263628 | TP53  | Homo_sapiens           |
| 01:9606  | 460             | 0#NP_001263689 | TP53  | Homo_sapiens           |
| 01:9606  | 460             | 0#NP_001263690 | TP53  | Homo_sapiens           |
| 01:9606  | 460             | NM_000546      | TP53  | Homo_sapiens           |
| 01:9606  | 460             | NM_001126112   | TP53  | Homo_sapiens           |
| 01:9606  | 460             | NM_001126113   | TP53  | Homo_sapiens           |
| 01:9606  | 460             | NM_001126114   | TP53  | Homo_sapiens           |
| 01:9606  | 460             | NM_001126115   | TP53  | Homo_sapiens           |
| 01:9606  | 460             | NM_001126116   | TP53  | Homo_sapiens           |
| 01:9606  | 460             | NM_001126117   | TP53  | Homo_sapiens           |
| 01:9606  | 460             | NM_001126118   | TP53  | Homo_sapiens           |
| 01:9606  | 460             | NM_001276695   | TP53  | Homo_sapiens           |
| 01:9606  | 460             | NM_001276696   | TP53  | Homo_sapiens           |
| 01:9606  | 460             | NM_001276697   | TP53  | Homo_sapiens           |
| 01:9606  | 460             | NM_001276698   | TP53  | Homo_sapiens           |
| 01:9606  | 460             | NM_001276699   | TP53  | Homo_sapiens           |
| 01:9606  | 460             | NM_001276760   | TP53  | Homo_sapiens           |
| 01:9606  | 460             | NM_001276761   | TP53  | Homo_sapiens           |
| 03:9544  | 460             | NM_001047151   | TP53  | Macaca_mulatta         |
| 04:9913  | 460             | NM_174201      | TP53  | Bos_taurus             |
| 05:9615  | 460             | NM_001003210   | TP53  | Canis_lupus_familiaris |
| 06:10116 | 460             | NM_030989      | TP53  | Rattus_norvegicus      |
| 07:10090 | 460             | NM_001127233   | Trp53 | Mus_musculus           |
| 07:10090 | 460             | NM_011640      | Trp53 | Mus_musculus           |
| 09:8364  | 460             | NM_001001903   | tp53  | Xenopus_tropicalis     |
| 10:7955  | 460             | NM_001271820   | tp53  | Danio_rerio            |
| 10:7955  | 460             | NM_131327      | tp53  | Danio_rerio            |

# *ARL6IP5*

Ac-MEPLSTLQLSSADRLPPPPPPDSGGEER

CLUSTAL O(1.2.1) multiple sequence alignment

```
00:1|Ac-MEPLSTLQLSSADRLPPPPPPDSGGEER
01:9606|4673|0#NP_006398|ARL6IP5|Homo_sapiens
01:9606|4673|NM_006407|ARL6IP5|Homo_sapiens
03:9544|4673|NM_001257759|ARL6IP5|Macaca_mulatta
04:9913|4673|NM_001014891|ARL6IP5|Bos_taurus
06:10116|4673|NM_023972|Arl6ip5|Rattus_norvegicus
07:10090|4673|NM_022992|Arl6ip5|Mus_musculus
08:9031|4673|NM_001012605|ARL6IP5|Gallus_gallus
09:8364|4673|NM_001127430|arl6ip5|Xenopus_tropicalis
10:7955|4673|NM_001002517|arl6ip5b|Danio_rerio
10:7955|4673|NM_001006096|arl6ip5a|Danio_rerio
12:7227|4673|NM_136057|Jwa|Drosophila_melanogaster
13:6239|4673|NM_001027933|praf-3|Caenorhabditis_elegans
13:6239|4673|NM_001027934|praf-3|Caenorhabditis_elegans
```

```
00:1|Ac-MEPLSTLQLSSADRLPPPPPPDSGGEER
01:9606|4673|0#NP_006398|ARL6IP5|Homo_sapiens
01:9606|4673|NM_006407|ARL6IP5|Homo_sapiens
03:9544|4673|NM_001257759|ARL6IP5|Macaca_mulatta
04:9913|4673|NM_001014891|ARL6IP5|Bos_taurus
06:10116|4673|NM_023972|Arl6ip5|Rattus_norvegicus
07:10090|4673|NM_022992|Arl6ip5|Mus_musculus
08:9031|4673|NM_001012605|ARL6IP5|Gallus_gallus
09:8364|4673|NM_001127430|arl6ip5|Xenopus_tropicalis
10:7955|4673|NM_001002517|arl6ip5b|Danio_rerio
10:7955|4673|NM_001006096|arl6ip5a|Danio_rerio
12:7227|4673|NM_136057|Jwa|Drosophila_melanogaster
13:6239|4673|NM_001027933|praf-3|Caenorhabditis_elegans
13:6239|4673|NM_001027934|praf-3|Caenorhabditis_elegans
```

```
00:1|Ac-MEPLSTLQLSSADRLPPPPPPDSGGEER
01:9606|4673|0#NP_006398|ARL6IP5|Homo_sapiens
01:9606|4673|NM_006407|ARL6IP5|Homo_sapiens
03:9544|4673|NM_001257759|ARL6IP5|Macaca_mulatta
04:9913|4673|NM_001014891|ARL6IP5|Bos_taurus
06:10116|4673|NM_023972|Arl6ip5|Rattus_norvegicus
07:10090|4673|NM_022992|Arl6ip5|Mus_musculus
08:9031|4673|NM_001012605|ARL6IP5|Gallus_gallus
09:8364|4673|NM_001127430|arl6ip5|Xenopus_tropicalis
10:7955|4673|NM_001002517|arl6ip5b|Danio_rerio
10:7955|4673|NM_001006096|arl6ip5a|Danio_rerio
12:7227|4673|NM_136057|Jwa|Drosophila_melanogaster
13:6239|4673|NM_001027933|praf-3|Caenorhabditis_elegans
13:6239|4673|NM_001027934|praf-3|Caenorhabditis_elegans
```

```
00:1|Ac-MEPLSTLQLSSADRLPPPPPPDSGGEER
01:9606|4673|0#NP_006398|ARL6IP5|Homo_sapiens
01:9606|4673|NM_006407|ARL6IP5|Homo_sapiens
03:9544|4673|NM_001257759|ARL6IP5|Macaca_mulatta
04:9913|4673|NM_001014891|ARL6IP5|Bos_taurus
06:10116|4673|NM_023972|Arl6ip5|Rattus_norvegicus
07:10090|4673|NM_022992|Arl6ip5|Mus_musculus
08:9031|4673|NM_001012605|ARL6IP5|Gallus_gallus
09:8364|4673|NM_001127430|arl6ip5|Xenopus_tropicalis
10:7955|4673|NM_001002517|arl6ip5b|Danio_rerio
10:7955|4673|NM_001006096|arl6ip5a|Danio_rerio
12:7227|4673|NM_136057|Jwa|Drosophila_melanogaster
13:6239|4673|NM_001027933|praf-3|Caenorhabditis_elegans
13:6239|4673|NM_001027934|praf-3|Caenorhabditis_elegans
```

```
00:1|Ac-MEPLSTLQLSSADRLPPPPPPDSGGEER
01:9606|4673|0#NP_006398|ARL6IP5|Homo_sapiens
01:9606|4673|NM_006407|ARL6IP5|Homo_sapiens
03:9544|4673|NM_001257759|ARL6IP5|Macaca_mulatta
04:9913|4673|NM_001014891|ARL6IP5|Bos_taurus
06:10116|4673|NM_023972|Arl6ip5|Rattus_norvegicus
07:10090|4673|NM_022992|Arl6ip5|Mus_musculus
08:9031|4673|NM_001012605|ARL6IP5|Gallus_gallus
09:8364|4673|NM_001127430|arl6ip5|Xenopus_tropicalis
10:7955|4673|NM_001002517|arl6ip5b|Danio_rerio
10:7955|4673|NM_001006096|arl6ip5a|Danio_rerio
12:7227|4673|NM_136057|Jwa|Drosophila_melanogaster
13:6239|4673|NM_001027933|praf-3|Caenorhabditis_elegans
13:6239|4673|NM_001027934|praf-3|Caenorhabditis_elegans
```

```
00:1|Ac-MEPLSTLQLSSADRLPPPPPPDSGGEER
01:9606|4673|0#NP_006398|ARL6IP5|Homo_sapiens
01:9606|4673|NM_006407|ARL6IP5|Homo_sapiens
```

03:9544|4673|NM\_001257759|ARL6IP5|Macaca\_mulatta  
04:9913|4673|NM\_001014891|ARL6IP5|Bos\_taurus  
06:10116|4673|NM\_023972|Arl6ip5|Rattus\_norvegicus  
07:10090|4673|NM\_022992|Arl6ip5|Mus\_musculus  
08:9031|4673|NM\_001012605|ARL6IP5|Gallus\_gallus  
09:8364|4673|NM\_001127430|arl6ip5|Xenopus\_tropicalis  
10:7955|4673|NM\_001002517|arl6ip5b|Danio\_rerio  
10:7955|4673|NM\_001006096|arl6ip5a|Danio\_rerio  
12:7227|4673|NM\_136057|Jwa|Drosophila\_melanogaster  
13:6239|4673|NM\_001027933|praf-3|Caenorhabditis\_elegans  
13:6239|4673|NM\_001027934|praf-3|Caenorhabditis\_elegans

00:1|Ac-MEPLSTLQLSSADRLPPPPPPDSGGEER  
01:9606|4673|0#NP\_006398|ARL6IP5|Homo\_sapiens  
01:9606|4673|NM\_006407|ARL6IP5|Homo\_sapiens  
03:9544|4673|NM\_001257759|ARL6IP5|Macaca\_mulatta  
04:9913|4673|NM\_001014891|ARL6IP5|Bos\_taurus  
06:10116|4673|NM\_023972|Arl6ip5|Rattus\_norvegicus  
07:10090|4673|NM\_022992|Arl6ip5|Mus\_musculus  
08:9031|4673|NM\_001012605|ARL6IP5|Gallus\_gallus  
09:8364|4673|NM\_001127430|arl6ip5|Xenopus\_tropicalis  
10:7955|4673|NM\_001002517|arl6ip5b|Danio\_rerio  
10:7955|4673|NM\_001006096|arl6ip5a|Danio\_rerio  
12:7227|4673|NM\_136057|Jwa|Drosophila\_melanogaster  
13:6239|4673|NM\_001027933|praf-3|Caenorhabditis\_elegans  
13:6239|4673|NM\_001027934|praf-3|Caenorhabditis\_elegans

00:1|Ac-MEPLSTLQLSSADRLPPPPPPDSGGEER  
01:9606|4673|0#NP\_006398|ARL6IP5|Homo\_sapiens  
01:9606|4673|NM\_006407|ARL6IP5|Homo\_sapiens  
03:9544|4673|NM\_001257759|ARL6IP5|Macaca\_mulatta  
04:9913|4673|NM\_001014891|ARL6IP5|Bos\_taurus  
06:10116|4673|NM\_023972|Arl6ip5|Rattus\_norvegicus  
07:10090|4673|NM\_022992|Arl6ip5|Mus\_musculus  
08:9031|4673|NM\_001012605|ARL6IP5|Gallus\_gallus  
09:8364|4673|NM\_001127430|arl6ip5|Xenopus\_tropicalis  
10:7955|4673|NM\_001002517|arl6ip5b|Danio\_rerio  
10:7955|4673|NM\_001006096|arl6ip5a|Danio\_rerio  
12:7227|4673|NM\_136057|Jwa|Drosophila\_melanogaster  
13:6239|4673|NM\_001027933|praf-3|Caenorhabditis\_elegans  
13:6239|4673|NM\_001027934|praf-3|Caenorhabditis\_elegans

SVVGFLSPFNMLGGIIVVVLVFTGFVWAAHNKDILRRM-----KKRYPTT  
SVVGFLSPFNMLGGIIVVVLVFTGFVWAAHNKDILRRM-----KKQYPTA  
SVVGFLSPFNMLGGIIVVVLVFTGFVWAAHNKDILRRM-----KKQYPTA  
SVVGFLSPFNMLGGIIVVVLVFMGFVWAAHNKDILRRM-----KKQYPTA  
AIVGFLSPLNMLIGGTVVILVFLGFVWVSHNKDILRRM-----KKQYPTT  
-----  
LIVGFLNPVGMFLGGAVVALVFMGSVWAGENKTIKKNF-----KKKNPSL  
LVVGFLNPVSMFTGAVVVASVFIGSVWAGENKAIKKF-----KKENPSL  
VLMIFNPSKIIITGLLV-QALIIIGVIWQFFSGKSKKNFIASRLTGGNANAEEQNAQQKWY  
LLHTFISSQDIFVGLIAVVAVIATLIFAVSADANIKKM-----RTDHPLV  
-----M-----RTDHPLV

-----  
FVMVVMLASYFLISMFGGVMVFVFGITFPLLLMFIHASLRLRNLKNKLENKMEGIGLKRT  
FVMVVMLASYFLISMFGGVMVFVFGITFPLLLMFIHASLRLRNLKNKLENKMEGIGLKRT  
FVMVVMLASYFLISMFGGVMVFVFGITFPLLLMFIHASLRLRNLKNKLENKMEGIGLKRT  
FVMVVMLASYFLISLFGGVMVFVFGITFPLLLMFIHASLRLRNLKNKLENKMEEIGLKRT  
FVMVVMLASYFLISMFGGVMVFVFGITFPLLLMFIHASLRLRNLKNKLENKMEGIGLKRT  
FVMVVMLASYFLISMFGGVMVFVFGITLPLLLMFIHASLRLRNLKNKLENKMEGIGLKRT  
FVIVIMLSSYFLISYLGDMVMFMFGITLPLLLMFIHASLRLRNLKNKLENKKEEIGLKRT  
-----  
FVVAVMGISYFLLSLCGVMVFLFGITFPMLLILIHASLRLRSVKNKLENKIEGIGLKRT  
FVFLVMVVSYFLMSLFGGVMVFLLGIKLPLLLIFAHASLRLRNLKNKLENKMESAGLKKS  
ILAGALLGGYLLHLHAVLLTIFTVLLPISLTFIHASLRLRNLKNKLTNSIESFA-PST  
TLGGIILVAYFFISVFSQSVLVVAFALLFPVFLVLVHASLRLRGIANRAANVKEQLGIRTS  
TLGGIILVAYFFISVFSQSVLVVAFALLFPVFLVLVHASLRLRGIANRAANVKEQLGIRTS

-----  
PMGIVLDALEQQEEGINRLTDYISKVKE-  
PMGIVLDALEQQEEGINRLTDYISKVKE-  
PMGIVLDALEQQEEGINRLTDYISKVKE-  
PMGIVLDALEQQEETITKFSYISKMKE-  
PMGIILDALEQQEDSINKFADYISKARE-  
PMGIILDALEQQEDNINKFADYISKARE-  
PMGIILDALEQQEDNINKLASIYPKVKE-  
-----  
PMGVILDLLDQQEEKINKIQDFLESKIKD  
PMGIILEALGQEEENFNKIQDFLESKLKE  
PMGSLLDALNVRAEGVFN-----  
VMGQILDRTGLNVKV-----  
VMGQILDRTGLNVKV-----

*RGS14*

Ac-AGAAHSPHGGQPPR

CLUSTAL O(1.2.1) multiple sequence alignment

|                                                 |                                                                   |
|-------------------------------------------------|-------------------------------------------------------------------|
| 00:1 Ac-AGAAHSPHGGQPPR                          | -----AGAAHSPHGGQPPR----                                           |
| 01:9606 4735 0#NP_006471 RGS14 Homo_sapiens     | -----                                                             |
| 01:9606 4735 NM_006480 RGS14 Homo_sapiens       | -----GP-----AGAESG----SLHCL-PATVQALAGAAHSPHGGQPPRRGPL             |
| 04:9913 4735 NM_001192731 RGS14 Bos_taurus      | -----GP-----AGADLG----SLCHL-PVIVQALAGAAARSPHGGRRPTRRGPV           |
| 06:10116 4735 NM_053764 Rgs14 Rattus_norvegicus | TLPPVAEKRGSSELVFDVRRRSRAS----SLHCL-PATLRVLVGVSTILVVGPPWRGPV       |
| 07:10090 4735 NM_016758 Rgs14 Mus_musculus      | -----GPGGA-----ELSL----STACL-PP----QESASAILVVGPPWRGPV             |
| 10:7955 4735 NM_201304 rgs14a Danio_rerio       | -----LYHLFEFEARQNHGIKANLTVSVFSTVYNI IIVIMVAIKAISQSFCRLARGAS       |
| 00:1 Ac-AGAAHSPHGGQPPR                          | -----                                                             |
| 01:9606 4735 0#NP_006471 RGS14 Homo_sapiens     | ----MPGKPKHLGV-PNGRMVLAVSDGELSSSTTGPQGGEGRGSLSIHSLPSGPSSPFP       |
| 01:9606 4735 NM_006480 RGS14 Homo_sapiens       | IGSGMPGKPKHLGV-PNGRMVLAVSDGELSSSTTGPQGGEGRGSLSIHSLPSGPSSPFP       |
| 04:9913 4735 NM_001192731 RGS14 Bos_taurus      | KSSGMPGKPKHLGV-PNGRMVLAVSDGELSSSTTGPQGGEGRGSLSIHSLPSGPSSPFP       |
| 06:10116 4735 NM_053764 Rgs14 Rattus_norvegicus | SNGGMPGKPKHLGV-PNGRMVLAVSDGELTSTSGSQAQGEGRGSLSIHSLPSGPSSPFS       |
| 07:10090 4735 NM_016758 Rgs14 Mus_musculus      | INGGMPGKPKHLGV-PNGRMVLAVSDGELTSTAGSQAQGEGRGSLSIHSLPSGPSSPFS       |
| 10:7955 4735 NM_201304 rgs14a Danio_rerio       | LQIKF-NKSRVLKMRSSCQTQAVSDGELNLRLSS----CGSSSSLSSESSSRSGSQAAD       |
| 00:1 Ac-AGAAHSPHGGQPPR                          | -----                                                             |
| 01:9606 4735 0#NP_006471 RGS14 Homo_sapiens     | TEEQPVASWALSFERLLQDPLGLAYFTEFLKKEFSAENVTFWKACERFQQIPASDTQQLA      |
| 01:9606 4735 NM_006480 RGS14 Homo_sapiens       | TEEQPVASWALSFERLLQDPLGLAYFTEFLKKEFSAENVTFWKACERFQQIPASDTQQLA      |
| 04:9913 4735 NM_001192731 RGS14 Bos_taurus      | TEEQPVASWGLSFERLLQDPLGLAYFTEFLKKEFSAENVTFWKACERFQQIPASDTQQLA      |
| 06:10116 4735 NM_053764 Rgs14 Rattus_norvegicus | TDEQPVASWAQSFERLLQDPRGLAYFTEFLKKEFSAENVTFWQACERFQQIPASDTKQLA      |
| 07:10090 4735 NM_016758 Rgs14 Mus_musculus      | TEQPVASWAQSFERLLQDPRGLAYFTEFLKKEFSAENVTFWKACERFQQIPASDTKQLA       |
| 10:7955 4735 NM_201304 rgs14a Danio_rerio       | GPASRVVSWAVCFEHLLEDHVGVRVFTEFLRSEVSAENILFYQACEKFKKIPPSRLEEMK      |
| 00:1 Ac-AGAAHSPHGGQPPR                          | -----                                                             |
| 01:9606 4735 0#NP_006471 RGS14 Homo_sapiens     | QEARNIYQEFLLSSQALSPVNIDRQAWLGEEVLAEPDPDMFRAQQLQIFNLMKFDSYARFV     |
| 01:9606 4735 NM_006480 RGS14 Homo_sapiens       | QEARNIYQEFLLSSQALSPVNIDRQAWLGEEVLAEPDPDMFRAQQLQIFNLMKFDSYARFV     |
| 04:9913 4735 NM_001192731 RGS14 Bos_taurus      | QEARNIYQEFLLSSQALSPVNIDRQAWLGEEVLAEPDPDMFRAQQLQIFNLMKFDSYARFV     |
| 06:10116 4735 NM_053764 Rgs14 Rattus_norvegicus | QEAHNIYHEFLSSQALSPVNIDRQAWLSEEVLAQPRPDMFRAQQLQIFNLMKFDSYARFV      |
| 07:10090 4735 NM_016758 Rgs14 Mus_musculus      | QEAHNIYHEFLSSQALSPVNIDRQAWLSEEVLAQPRPDMFRAQQLQIFNLMKFDSYARFV      |
| 10:7955 4735 NM_201304 rgs14a Danio_rerio       | KEARLIYDTFLSESSLHAVNIDDTAQTEERELETPTPDMFNKAQAQIFKLMKMSYTRFV       |
| 00:1 Ac-AGAAHSPHGGQPPR                          | -----                                                             |
| 01:9606 4735 0#NP_006471 RGS14 Homo_sapiens     | KSPLYRECLLAAEAGRPLREPSSSRLGSPDATRKKPKLKP GKSLPLGVEEL----GQLPP     |
| 01:9606 4735 NM_006480 RGS14 Homo_sapiens       | KSPLYRECLLAAEAGRPLREPSSSRLGSPDATRKKPKLKP GKSLPLGVEEL----GQLPP     |
| 04:9913 4735 NM_001192731 RGS14 Bos_taurus      | KSPLYRECLLAAEAGRPLREPSSWRPGSPDTRKKPKLKP GKSLPLGVEEL----GQLPP      |
| 06:10116 4735 NM_053764 Rgs14 Rattus_norvegicus | KSPLYQECCLLAAEAGRPLREPSSSHLGSPDATRKKPKLKP GKSLPLGVEEL----GQLPL    |
| 07:10090 4735 NM_016758 Rgs14 Mus_musculus      | KSPLYQECCLLAAEAGRPLREPSSSHLGSPDATRKKPKLKP GKSLPLGVEEL----GQLPL    |
| 10:7955 4735 NM_201304 rgs14a Danio_rerio       | RSPLYQNCMLACVESRPLPSIGTPEPKSKMSKKSATPPSNRKSVELVPPSSDSKTSRKKR      |
| 00:1 Ac-AGAAHSPHGGQPPR                          | -----                                                             |
| 01:9606 4735 0#NP_006471 RGS14 Homo_sapiens     | VEGPGGRPLRKSFREELG-GTANAALRRSQGSLNSSASLDLGLAFVSSKSES HRKSLG       |
| 01:9606 4735 NM_006480 RGS14 Homo_sapiens       | VEGPGGRPLRKSFREELG-GTANAALRRSQGSLNSSASLDLGLAFVSSKSES HRKSLG       |
| 04:9913 4735 NM_001192731 RGS14 Bos_taurus      | AE---GRPLRKSFREELAGGAANTALRRSQGSLNSSASLDLGLAFVSSKSES HRKSLG       |
| 06:10116 4735 NM_053764 Rgs14 Rattus_norvegicus | AE---GRPLRKSFREMPGGAVNSALRRSQGSLNSSASLDLGLAFVSSKSES HRKSLG        |
| 07:10090 4735 NM_016758 Rgs14 Mus_musculus      | AEGPCGRPLRKSFREMTGGAMNSALRRSQGSLNSSASLDLGLAFVSSKSES HRKSLG        |
| 10:7955 4735 NM_201304 rgs14a Danio_rerio       | LENRGSWGADQSFERM-----AVSRKESQISVKSNSSLELVS---GSGRVENGRCVSA        |
| 00:1 Ac-AGAAHSPHGGQPPR                          | -----                                                             |
| 01:9606 4735 0#NP_006471 RGS14 Homo_sapiens     | ST----EGESES RP GK YCCVYLPDGTASLALARPGLTIRDMLAGICEKRGSLSPDIKVYL   |
| 01:9606 4735 NM_006480 RGS14 Homo_sapiens       | ST----EGESES RP GK YCCVYLPDGTASLALARPGLTIRDMLAGICEKRGSLSPDIKVYL   |
| 04:9913 4735 NM_001192731 RGS14 Bos_taurus      | SS----EGENES RP GK YCCVYLPDGTASLALARPGLTIRDMLAGICEKRGSLSPDIKVYL   |
| 06:10116 4735 NM_053764 Rgs14 Rattus_norvegicus | SG----EGESES RP GK YCCVYLPDGTASLALARPGLTIRDMLAGICEKRGSLSPDIKVYL   |
| 07:10090 4735 NM_016758 Rgs14 Mus_musculus      | SG----ESES ES RP GK YCCVYLPDGTASLALARPGLTIRDMLAGICEKRGSLSPDIKVYL  |
| 10:7955 4735 NM_201304 rgs14a Danio_rerio       | VSDPEALSSGSPTADKYCCVYLPDGTASLV SARAGLSLRDMISSLCEKRAFFLRDLVLLYL    |
| 00:1 Ac-AGAAHSPHGGQPPR                          | -----                                                             |
| 01:9606 4735 0#NP_006471 RGS14 Homo_sapiens     | VGNEQ-ALVLDQDCTVLADQEVRL ENRITFELELTALERVVRISAKPTKR LQEALQPILE    |
| 01:9606 4735 NM_006480 RGS14 Homo_sapiens       | VGNEQ-ALVLDQDCTVLADQEVRL ENRITFELELTALERVVRISAKPTKR LQEALQPILE    |
| 04:9913 4735 NM_001192731 RGS14 Bos_taurus      | VGNEQ-ALVLDQDCTVLADQEVRL ENRITFELEVLALERLVRI SAKPTKR LQEALQPILT   |
| 06:10116 4735 NM_053764 Rgs14 Rattus_norvegicus | VGKEQKALVLDQDCTVLADQEVRL ENRITFQLELVGLERVVRISAKPTKR LQEALQPILA    |
| 07:10090 4735 NM_016758 Rgs14 Mus_musculus      | VGNEQKALVLDQDCTVLADQEVRL ENRITFQLELVGLERVVRISAKPTKR LQEALQPILA    |
| 10:7955 4735 NM_201304 rgs14a Danio_rerio       | RGKDK-PLSLDQDCSMFDDQQLSLELKITFALEIAFLGRITIGII AKPSKSVGEALSSVLE    |
| 00:1 Ac-AGAAHSPHGGQPPR                          | -----                                                             |
| 01:9606 4735 0#NP_006471 RGS14 Homo_sapiens     | KHGLSPLEVV LHRPGEKQPLDLGKLVSSVAAQRLVLDTLPGVKISKARDKSPCRSQGCPP     |
| 01:9606 4735 NM_006480 RGS14 Homo_sapiens       | KHGLSPLEVV LHRPGEKQPLDLGKLVSSVAAQRLVLDTLPGVKISKARDKSPCRSQGCPP     |
| 04:9913 4735 NM_001192731 RGS14 Bos_taurus      | KHGLSPQGVV LRLPGEKQPLDLEKLVSSVASQRLVLDTLPGV TTPQADDIPCHSGQGPP     |
| 06:10116 4735 NM_053764 Rgs14 Rattus_norvegicus | KHGLSLDQVV LHRPGEKQLVDLENLVSSVASQTLVLDTL PDAKTREASSIPPCR SQGCLP   |
| 07:10090 4735 NM_016758 Rgs14 Mus_musculus      | KHGLSLDQVV LHRPGEKQPM DLENPVSSVASQTLVLDTPPD AKMSEARSISP CR SQGCLP |
| 10:7955 4735 NM_201304 rgs14a Danio_rerio       | KQQLRPQDVQLSLSGSDNALNMSTSVFRLANKTVRLDRAALE-----                   |
| 00:1 Ac-AGAAHSPHGGQPPR                          | -----                                                             |
| 01:9606 4735 0#NP_006471 RGS14 Homo_sapiens     | RTQDKATHPPASPSSLVKVPSSATGKRQCTDIEGLVELLN RVQSSGAHDQRGLLRKEDL      |

|          |  |      |  |              |  |        |  |                   |                                                              |
|----------|--|------|--|--------------|--|--------|--|-------------------|--------------------------------------------------------------|
| 01:9606  |  | 4735 |  | NM_006480    |  | RGS14  |  | Homo_sapiens      | RTQDKATHPPASPSSLVKVPSSATGKRQTCDIEGLVELLNRVQSSGAHDQRGLLRKEDL  |
| 04:9913  |  | 4735 |  | NM_001192731 |  | RGS14  |  | Bos_taurus        | RIQDKATNLPPPSLNSLAQVPSSITGKRQTCDIEGLVELLNRVQSCGAHDQRGLLRKEDL |
| 06:10116 |  | 4735 |  | NM_053764    |  | Rgs14  |  | Rattus_norvegicus | RTQTKDShLPPLSSSLSVEDASGSTGKRQTCDIEGLVELLNRVQSSGAHDQRGLLRKEDL |
| 07:10090 |  | 4735 |  | NM_016758    |  | Rgs14  |  | Mus_musculus      | RTQTKDShLPSSSSLLVEDASSSTGNRQTCDIEGLVELLNRVQSSGAHDQRGLLRKEDL  |
| 10:7955  |  | 4735 |  | NM_201304    |  | rgs14a |  | Danio_rerio       | -----IQT----SSPSARANSRGRKHQDVGLELLNRAQCSRADDQRGLLTKEQL       |

|          |  |                   |  |              |  |        |  |                   |                                            |
|----------|--|-------------------|--|--------------|--|--------|--|-------------------|--------------------------------------------|
| 00:1     |  | Ac-AGAAHSPHGGQPPR |  |              |  |        |  |                   | -----                                      |
| 01:9606  |  | 4735              |  | 0#NP_006471  |  | RGS14  |  | Homo_sapiens      | VLPEFLQLPAQGPPSSEETPPQTKSAAQPIGGSLNSTTDSAL |
| 01:9606  |  | 4735              |  | NM_006480    |  | RGS14  |  | Homo_sapiens      | VLPEFLQLPAQGPPSSEETPPQTKSAAQPIGGSLNSTTDSAL |
| 04:9913  |  | 4735              |  | NM_001192731 |  | RGS14  |  | Bos_taurus        | VLPEFLQLPAQGPPNSQQPPPVESAAQPKGSASDSTVHSAL  |
| 06:10116 |  | 4735              |  | NM_053764    |  | Rgs14  |  | Rattus_norvegicus | VLPEFLQLPSQRPQSGEAPP-----                  |
| 07:10090 |  | 4735              |  | NM_016758    |  | Rgs14  |  | Mus_musculus      | VLPEFLQLPSQRPQSGREAPP-----                 |
| 10:7955  |  | 4735              |  | NM_201304    |  | rgs14a |  | Danio_rerio       | EIPQFLQLPAGGAEDQECAL-----                  |

*STARD10*

Ac-ASASAAASTLSEPPR

CLUSTAL O(1.2.1) multiple sequence alignment

00:1|Ac-ASASAAASTLSEPPR  
01:9606|4841|0#NP\_006636|STARD10|Homo\_sapiens  
01:9606|4841|NM\_006645|STARD10|Homo\_sapiens  
04:9913|4841|NM\_001192379|STARD10|Bos\_taurus  
06:10116|4841|NM\_001013069|Stard10|Rattus\_norvegicus  
07:10090|4841|NM\_019990|Stard10|Mus\_musculus  
09:8364|4841|NM\_001126587|stard10|Xenopus\_tropicalis  
10:7955|4841|NM\_205646|zgc:77147|Danio\_rerio  
13:6239|4841|NM\_067059|T28D6.7|Caenorhabditis\_elegans

00:1|Ac-ASASAAASTLSEPPR  
01:9606|4841|0#NP\_006636|STARD10|Homo\_sapiens  
01:9606|4841|NM\_006645|STARD10|Homo\_sapiens  
04:9913|4841|NM\_001192379|STARD10|Bos\_taurus  
06:10116|4841|NM\_001013069|Stard10|Rattus\_norvegicus  
07:10090|4841|NM\_019990|Stard10|Mus\_musculus  
09:8364|4841|NM\_001126587|stard10|Xenopus\_tropicalis  
10:7955|4841|NM\_205646|zgc:77147|Danio\_rerio  
13:6239|4841|NM\_067059|T28D6.7|Caenorhabditis\_elegans

00:1|Ac-ASASAAASTLSEPPR  
01:9606|4841|0#NP\_006636|STARD10|Homo\_sapiens  
01:9606|4841|NM\_006645|STARD10|Homo\_sapiens  
04:9913|4841|NM\_001192379|STARD10|Bos\_taurus  
06:10116|4841|NM\_001013069|Stard10|Rattus\_norvegicus  
07:10090|4841|NM\_019990|Stard10|Mus\_musculus  
09:8364|4841|NM\_001126587|stard10|Xenopus\_tropicalis  
10:7955|4841|NM\_205646|zgc:77147|Danio\_rerio  
13:6239|4841|NM\_067059|T28D6.7|Caenorhabditis\_elegans

00:1|Ac-ASASAAASTLSEPPR  
01:9606|4841|0#NP\_006636|STARD10|Homo\_sapiens  
01:9606|4841|NM\_006645|STARD10|Homo\_sapiens  
04:9913|4841|NM\_001192379|STARD10|Bos\_taurus  
06:10116|4841|NM\_001013069|Stard10|Rattus\_norvegicus  
07:10090|4841|NM\_019990|Stard10|Mus\_musculus  
09:8364|4841|NM\_001126587|stard10|Xenopus\_tropicalis  
10:7955|4841|NM\_205646|zgc:77147|Danio\_rerio  
13:6239|4841|NM\_067059|T28D6.7|Caenorhabditis\_elegans

00:1|Ac-ASASAAASTLSEPPR  
01:9606|4841|0#NP\_006636|STARD10|Homo\_sapiens  
01:9606|4841|NM\_006645|STARD10|Homo\_sapiens  
04:9913|4841|NM\_001192379|STARD10|Bos\_taurus  
06:10116|4841|NM\_001013069|Stard10|Rattus\_norvegicus  
07:10090|4841|NM\_019990|Stard10|Mus\_musculus  
09:8364|4841|NM\_001126587|stard10|Xenopus\_tropicalis  
10:7955|4841|NM\_205646|zgc:77147|Danio\_rerio  
13:6239|4841|NM\_067059|T28D6.7|Caenorhabditis\_elegans

00:1|Ac-ASASAAASTLSEPPR  
01:9606|4841|0#NP\_006636|STARD10|Homo\_sapiens  
01:9606|4841|NM\_006645|STARD10|Homo\_sapiens  
04:9913|4841|NM\_001192379|STARD10|Bos\_taurus  
06:10116|4841|NM\_001013069|Stard10|Rattus\_norvegicus  
07:10090|4841|NM\_019990|Stard10|Mus\_musculus  
09:8364|4841|NM\_001126587|stard10|Xenopus\_tropicalis  
10:7955|4841|NM\_205646|zgc:77147|Danio\_rerio  
13:6239|4841|NM\_067059|T28D6.7|Caenorhabditis\_elegans

00:1|Ac-ASASAAASTLSEPPR  
01:9606|4841|0#NP\_006636|STARD10|Homo\_sapiens  
01:9606|4841|NM\_006645|STARD10|Homo\_sapiens  
04:9913|4841|NM\_001192379|STARD10|Bos\_taurus  
06:10116|4841|NM\_001013069|Stard10|Rattus\_norvegicus  
07:10090|4841|NM\_019990|Stard10|Mus\_musculus  
09:8364|4841|NM\_001126587|stard10|Xenopus\_tropicalis  
10:7955|4841|NM\_205646|zgc:77147|Danio\_rerio  
13:6239|4841|NM\_067059|T28D6.7|Caenorhabditis\_elegans

-----ASASAAASTLSEPPR-----  
-----  
-----GGSGEFWRKRRVLELYRPCFSGPRKVASASAAASTLSEPPRRTQESRTRTRALG  
-----LDGPWKVASASAAASTLSEPPRRTQESRTRTRALG  
-----GPRKVASASAAAPTLESEPPRRTQESRTRTRAPG  
-----APAGPGREARTGPRKVASASAAASTLSEPPRRTQESRTRTRAPG  
-----GT---ASRLPALPAACPPRHQCPPAPPGTASR  
-----SKLSAFIH---TGVR---FDLRRRSGSGS  
MCSPLLKIYDFYGRPPAYFLQKATYSGI-----KLTRHVA

-----  
-----M-----EKLAASTEPPQGRPVLGRESVQVPDDQDFRSFRSECEAEVGNLTYSRA  
LPTLPM-----EKLAASTEPPQGRPVLGRESVQVPDDQDFRSFRSECEAEVGNLTYSRA  
LP---M-----EQSAVSPEPPGPRPVLGRDSVQVPDDQDFRSFRSECEAEAGWNLTYSKA  
LPTLSM-----EKPAASTEPPQGRPALGRESVQVPDDQDFRSFRSECEAEVGNLTYSKA  
LPTLPM-----EKPAASTEPPQGRPALGRESVQVPDDQDFRSFRSECEAEVGNLTYSKA  
LPPRALPAACPPHCQPPAPRTASRCAMSRDSVQIPDDRFQTFRTECYSDAGWTMTYSKS  
-----NRRRRMMMKTGDEEVLIPDDRAFSRFKHECEAEAGWTVTHNKS  
VQEKP RPRA-----SKQCTSKLMRVNVARVWEDSDYEKVNLCEDSEGWVEVYKKK

-----  
GVSVWVQAVEMDRTLHKIKCRMECCDVPAETLYDVLHDI EYRKKWDSNVIETFDIARLTV  
GVSVWVQAVEMDRTLHKIKCRMECCDVPAETLYDVLHDI EYRKKWDSNVIETFDIARLTV  
GVSVWVQAVEMDRTLHKIKCRMECRDVPAETLYDVLHDI EYRKKWDSNVIETFDIARLTV  
GVSVWVQAVEMDRTLHKIKCRMECCDVPAETLYDVLHDI EYRKKWDSNVIETFDIARLTV  
GVSVWVQAVEMDRTLHKIKCRMECCDVPAETLYDVLHDI EYRKKWDSNVIETFDIARLTV  
GITVWIIQL EERALHKKICKMECKDVSAEVLVDVLHDI EYRKKWDSNVIETFDIGKLT  
NICVWIIQLLEEDKSLHKIKCRMTCKDIPAETMYDVLHDI EYRKKWDANVIETFDIGKLT  
DITICTQNI EKS-SYQMIKAI AQLPDVSATVVYDVLHDSAYRAKWDKYMIKQETIGTINP

-----  
NADVGYYSWRCPKPLKNRDVITLRSWLPMGADYIIMNYSVKHPKYPPRKDLVRAVSIQTG  
NADVGYYSWRCPKPLKNRDVITLRSWLPMGADYIIMNYSVKHPKYPPRKDLVRAVSIQTG  
NADVGYYSWRCPKPLKNRDVITLRSWLPMTDYIIMNYSVKHPKYPPRKDLVRAVSIQTG  
NADVGYYSWRCPKPLKNRDVITLRSWLPMGADYIIMNYSVKHPKYPPRKDLVRAVSIQTG  
NADVGYYSWRCPKPLKNRDVITLRSWLPMGADYIIMNYSVKHPKYPPRKDLVRAVSIQTG  
NADIGYYAWKCPKPLKNRDVITLRSWLPFGNDYIIMNYSVKHAKYPPKDLVRAVSIQTG  
NADVGYYSWKCPKPLKNRDVITLRSWLPMGNDYIIMNYSVKHSKYPPKDLVRAVSIQTG  
NNDVCYYSLNSVSPIRPRDFVMQRSWLETDKDRLICSHSVCHEDYPPAKGCIRATVLSIG

-----  
YLIQSTGPKSCVITYLAQVDPKGS LPKWVVKSSQFLAPKAMKKMYKACLKYPEWKQKHL  
YLIQSTGPKSCVITYLAQVDPKGS LPKWVVKSSQFLAPKAMKKMYKACLKYPEWKQKHL  
YLIQSTGPKSCVITYLAQVDPKGS LPKWVVKSSQFLAPKAMKKMYKACVKYPEWKQKHQ  
YLIQSTGPKSCVITYLAQVDPKGS LPKWVVKSSQFLAPKAMKKMYKACIKYPEWKQKHQ  
YLIQSTGPKSCVITYLAQVDPKGS LPKWVVKSSQFLAPKAMKKMYKACIKYPEWKQKHQ  
YLIQSGGPKSATLIYLAQVDPGRS LPKWVVKSSQFLAPKAMKKMYKACVKYPEWKKKHN  
YLIQRTGPSSCTLTLYLAQVDPKGS LPKWVVKSSQLLAPKAMKRISKACARYPEWKQKHS  
YLIKEK--QGCEVIYIISHSDPKGKLPTWLVNRVTKVVPKVIKKLHKACLGYPEWKEKHH

-----  
PHFKPWLHPEQSP-LPSLALSEL SVQHADSLENIDESAVAESREERMGGAGGEGSDDDT  
PHFKPWLHPEQSP-LPSLALSEL SVQHADSLENIDESAVAESREERMGGAGGEGSDDDT  
PHFKPWLHPEQSS-LPSLALSEL SVQHADSLENIDESAVAESREDRTGSAGGEGSDDDT  
PHFKPWLHPEQSP-LPSLALSEL SVQHADSLENIDESAVTESREERAGGAG-EGSDDDT  
PHFKPWLHPEQSP-LPSLALSEL SVQHADSLENIDESAVTESREERAGGAGGEGSDDDT  
PHHKPWLYPEQST-LPTISLADVSIQHADSLENIDE SSATETKDDRGEASDEDSVN---  
PGFKPWLPEQNP-LSSI PMSELSIQHAESLENIDESALSES RDERAEHSDSDNANN---  
PTWKPWSVPEQQMDLPRVDLLKCQPK-DYEQEIIIDESNL SAMSISTKDEDEDESLKN---

--  
LT  
LT  
LT  
LT  
LT  
LT  
--  
--  
--

*EPB41L3*

Ac-MEQFAAAAHSTPVR

```
00:1|Ac-MEQFAAAAAHSTPVR
01:9606|49308|0#NP_001268462|EPB41L3|Homo_sapiens
01:9606|49308|0#NP_001268463|EPB41L3|Homo_sapiens
```

[illegible]

-----  
DPAKEIKKQVRSGAWHFSFNVKFYPPDPAQLSEIDITRYLCLQLRDDIVSGRLPCSFVTL  
DPAKEIKKQVRSGAWHFSFNVKFYPPDPAQLSEIDITRYLCLQLRDDIVSGRLPCSFVTL



|          |       |              |          |                    |                                                              |   |
|----------|-------|--------------|----------|--------------------|--------------------------------------------------------------|---|
| 04:9913  | 49308 | NM_001206169 | EPB41L3  | Bos_taurus         | -----EVGTGQYITTKGMSQTNLITTVTPEKKAAEEERDEEEDRRKKA----         | E |
| 06:10116 | 49308 | NM_053927    | Epb41l3  | Rattus_norvegicus  | NHEIYMKDSMSAAEVGTGQYATTKVISQTNLITTVTPEKKAAEEHVVEEDRRKKA----  | E |
| 07:10090 | 49308 | NM_013813    | Epb4.1l3 | Mus_musculus       | NHEIYMKDSVSAAEVGTGQYATTKGISQTNLITTVTPEKKAAEEERVEEEDRRKKA---- | E |
| 09:8364  | 49308 | NM_001078705 | epb41l3  | Xenopus_tropicalis | NHDLYMKDSVSATEVGTGPYITAKGISQTNLITTVTPEKKAAEEERDEEEKKKKV----  | E |
| 10:7955  | 49308 | NM_214812    | epb41l3b | Danio_rerio        | NHEELKNSKPAA-----VPDELITAETPEKKSEEKINSTEEENKTTAEPE           |   |

|          |                    |                |          |                    |                                                             |  |
|----------|--------------------|----------------|----------|--------------------|-------------------------------------------------------------|--|
| 00:1     | Ac-MEQFAAAAAHSTPVR |                |          |                    | -----                                                       |  |
| 01:9606  | 49308              | 0#NP_001268462 | EPB41L3  | Homo_sapiens       | EVTPISAIRHEGKT-----                                         |  |
| 01:9606  | 49308              | 0#NP_001268463 | EPB41L3  | Homo_sapiens       | EVTPISAIRHEGKT-----                                         |  |
| 01:9606  | 49308              | 0#NP_001268464 | EPB41L3  | Homo_sapiens       | EVTPISAIRHEGKT-----                                         |  |
| 01:9606  | 49308              | 0#NP_036439    | EPB41L3  | Homo_sapiens       | EVTPISAIRHEGKSPGLGTDSCPLSPSTHCAPTSPTELRRRCKENDCKLPGYEPSRA-E |  |
| 01:9606  | 49308              | NM_001281533   | EPB41L3  | Homo_sapiens       | EVTPISAIRHEGKT-----                                         |  |
| 01:9606  | 49308              | NM_001281534   | EPB41L3  | Homo_sapiens       | EVTPISAIRHEGKT-----                                         |  |
| 01:9606  | 49308              | NM_001281535   | EPB41L3  | Homo_sapiens       | EVTPISAIRHEGKT-----                                         |  |
| 01:9606  | 49308              | NM_012307      | EPB41L3  | Homo_sapiens       | EVTPISAIRHEGKSPGLGTDSCPLSPSTHCAPTSPTELRRRCKENDCKLPGYEPSRA-E |  |
| 04:9913  | 49308              | NM_001206169   | EPB41L3  | Bos_taurus         | EATPVAAVRHEGKSPGLGTDSCPLPPSAHRPPASPTGLRRRCKENGQPPGLVELARDSR |  |
| 06:10116 | 49308              | NM_053927      | Epb41l3  | Rattus_norvegicus  | EATPVAALRHEGKSPGHGSDSCPLSPPSAHLDPSPTELRRRCKEKERASPGSAVPR--  |  |
| 07:10090 | 49308              | NM_013813      | Epb4.1l3 | Mus_musculus       | EATPVTALRHEGKT-----                                         |  |
| 09:8364  | 49308              | NM_001078705   | epb41l3  | Xenopus_tropicalis | IITVTVTIRHDT-----                                           |  |
| 10:7955  | 49308              | NM_214812      | epb41l3b | Danio_rerio        | QASPVTCKVYS--SDALVSD---LSLPS----SPVSSTRVRCRRRVCVRQRAASVSPAK |  |

|          |                    |                |          |                    |                                                               |  |
|----------|--------------------|----------------|----------|--------------------|---------------------------------------------------------------|--|
| 00:1     | Ac-MEQFAAAAAHSTPVR |                |          |                    | -----                                                         |  |
| 01:9606  | 49308              | 0#NP_001268462 | EPB41L3  | Homo_sapiens       | -----                                                         |  |
| 01:9606  | 49308              | 0#NP_001268463 | EPB41L3  | Homo_sapiens       | -----                                                         |  |
| 01:9606  | 49308              | 0#NP_001268464 | EPB41L3  | Homo_sapiens       | -----                                                         |  |
| 01:9606  | 49308              | 0#NP_036439    | EPB41L3  | Homo_sapiens       | HLPGEPALDS-DGPGRPYLGQDVAFSY--RQQTGKGTTLFSFSLQLPESFPSLLDDDDGY  |  |
| 01:9606  | 49308              | NM_001281533   | EPB41L3  | Homo_sapiens       | -----                                                         |  |
| 01:9606  | 49308              | NM_001281534   | EPB41L3  | Homo_sapiens       | -----                                                         |  |
| 01:9606  | 49308              | NM_001281535   | EPB41L3  | Homo_sapiens       | -----                                                         |  |
| 01:9606  | 49308              | NM_012307      | EPB41L3  | Homo_sapiens       | HLPGEPALDS-DGPGRPYLGQDVAFSY--RQQTGKGTTLFSFSLQLPESFPSLLDDDDGY  |  |
| 04:9913  | 49308              | NM_001206169   | EPB41L3  | Bos_taurus         | RQHGEPAADP-DSRGKPCPGDHDVALGY--KPQPGRGATLFSFSLQLPGSFPSLLDDDDGY |  |
| 06:10116 | 49308              | NM_053927      | Epb41l3  | Rattus_norvegicus  | ---ELSSES-DAQGKAYLGQDVAFSY--RQPAGKGTTLFSFSLQLPESFPSLLDDEDDGY  |  |
| 07:10090 | 49308              | NM_013813      | Epb4.1l3 | Mus_musculus       | -----                                                         |  |
| 09:8364  | 49308              | NM_001078705   | epb41l3  | Xenopus_tropicalis | -----                                                         |  |
| 10:7955  | 49308              | NM_214812      | epb41l3b | Danio_rerio        | SGAGERRRRAQEERRAALLEERALLSARKQRLSRRRGTLFSFSLHLPDV-SALLDDDDGY  |  |

|          |                    |                |          |                    |                                                                 |  |
|----------|--------------------|----------------|----------|--------------------|-----------------------------------------------------------------|--|
| 00:1     | Ac-MEQFAAAAAHSTPVR |                |          |                    | -----                                                           |  |
| 01:9606  | 49308              | 0#NP_001268462 | EPB41L3  | Homo_sapiens       | -----                                                           |  |
| 01:9606  | 49308              | 0#NP_001268463 | EPB41L3  | Homo_sapiens       | -----                                                           |  |
| 01:9606  | 49308              | 0#NP_001268464 | EPB41L3  | Homo_sapiens       | -----                                                           |  |
| 01:9606  | 49308              | 0#NP_036439    | EPB41L3  | Homo_sapiens       | LSFPNLSSETNLLPQSLQHLYLPIRSPSLVPCFLFIFFFLLSASFSPVYALTLFSFPLALCLC |  |
| 01:9606  | 49308              | NM_001281533   | EPB41L3  | Homo_sapiens       | -----                                                           |  |
| 01:9606  | 49308              | NM_001281534   | EPB41L3  | Homo_sapiens       | -----                                                           |  |
| 01:9606  | 49308              | NM_001281535   | EPB41L3  | Homo_sapiens       | -----                                                           |  |
| 01:9606  | 49308              | NM_012307      | EPB41L3  | Homo_sapiens       | LSFPNLSSETNLLPQSLQHLYLPIRSPSLVPCFLFIFFFLLSASFSPVYALTLFSFPLALCLC |  |
| 04:9913  | 49308              | NM_001206169   | EPB41L3  | Bos_taurus         | LSFPNLSSESALLPQSLQHLYLPIRSPSLVPCFLFIFFFLLSASFSPVYALTLFSFPLALCLC |  |
| 06:10116 | 49308              | NM_053927      | Epb41l3  | Rattus_norvegicus  | LSFPNLSSETNLLPQSQWHFLPIRSPSLPCFLFIFFFLLSASFSPVYALTLFSFPLALCLC   |  |
| 07:10090 | 49308              | NM_013813      | Epb4.1l3 | Mus_musculus       | -----                                                           |  |
| 09:8364  | 49308              | NM_001078705   | epb41l3  | Xenopus_tropicalis | -----                                                           |  |
| 10:7955  | 49308              | NM_214812      | epb41l3b | Danio_rerio        | LSFPDLTELRLPQSLQRCVCPVRSPSLIPCFLFIFFFLSTSFSPVYALTLFSFPLALCLC    |  |

|          |                    |                |          |                    |                                                               |  |
|----------|--------------------|----------------|----------|--------------------|---------------------------------------------------------------|--|
| 00:1     | Ac-MEQFAAAAAHSTPVR |                |          |                    | -----                                                         |  |
| 01:9606  | 49308              | 0#NP_001268462 | EPB41L3  | Homo_sapiens       | -----DSERTDTAADGETT-ATESDQEEDAELKAQELEK                       |  |
| 01:9606  | 49308              | 0#NP_001268463 | EPB41L3  | Homo_sapiens       | -----DSERTDTAADGETT-AT-----EELEK                              |  |
| 01:9606  | 49308              | 0#NP_001268464 | EPB41L3  | Homo_sapiens       | -----DSERTDTAADGETT-AT-----EELEK                              |  |
| 01:9606  | 49308              | 0#NP_036439    | EPB41L3  | Homo_sapiens       | YLEPKAASLSASLNDNDPSDSSEEE-TDSERTDTAADGETT-ATESDQEEDAELKAQELEK |  |
| 01:9606  | 49308              | NM_001281533   | EPB41L3  | Homo_sapiens       | -----DSERTDTAADGETT-ATESDQEEDAELKAQELEK                       |  |
| 01:9606  | 49308              | NM_001281534   | EPB41L3  | Homo_sapiens       | -----DSERTDTAADGETT-AT-----EELEK                              |  |
| 01:9606  | 49308              | NM_001281535   | EPB41L3  | Homo_sapiens       | -----DSERTDTAADGETT-AT-----EELEK                              |  |
| 01:9606  | 49308              | NM_012307      | EPB41L3  | Homo_sapiens       | YLEPKAASLSASLNDNDPSDSSEEE-TDSERTDTAADGETT-ATESDQEEDAELKAQELEK |  |
| 04:9913  | 49308              | NM_001206169   | EPB41L3  | Bos_taurus         | YLEPKAASLSASLNDNDPSDSSEEE-TDSERTDTAADGETT-ATESDQEEDAELKAQELDK |  |
| 06:10116 | 49308              | NM_053927      | Epb41l3  | Rattus_norvegicus  | FLEPKAASLSASLNDNDPSDSSEEE-TDSERTDTAADGETS-ATESDQEEDAELKAQELDK |  |
| 07:10090 | 49308              | NM_013813      | Epb4.1l3 | Mus_musculus       | -----DSERTDTAADGETS-ATESDQEEDAEIKAQDLDK                       |  |
| 09:8364  | 49308              | NM_001078705   | epb41l3  | Xenopus_tropicalis | -----KEFDR                                                    |  |
| 10:7955  | 49308              | NM_214812      | epb41l3b | Danio_rerio        | YLEPRAAKLSSELTQSLQDPSSEDEETDSQQTDLAGDDDDTSLTESDFEDDAHRTQT---  |  |

|          |                    |                |          |                    |                                                                |  |
|----------|--------------------|----------------|----------|--------------------|----------------------------------------------------------------|--|
| 00:1     | Ac-MEQFAAAAAHSTPVR |                |          |                    | -----                                                          |  |
| 01:9606  | 49308              | 0#NP_001268462 | EPB41L3  | Homo_sapiens       | TQDDLMLKHQTNISELKRTFLETSTDTAVTNEWEKRLSTSPVRLAARQEDAPMIEPLVPPEE |  |
| 01:9606  | 49308              | 0#NP_001268463 | EPB41L3  | Homo_sapiens       | TQDDLMLKHQTNISELKRTFLETSTDTAVTNEWEKRLSTSPVRLAARQEDAPMIEPLVPPEE |  |
| 01:9606  | 49308              | 0#NP_001268464 | EPB41L3  | Homo_sapiens       | TQDDLMLKHQTNISELKRTFLETSTDTAVTNEWEKRLSTSPVRLAARQEDAPMIEPLVPPEE |  |
| 01:9606  | 49308              | 0#NP_036439    | EPB41L3  | Homo_sapiens       | TQDDLMLKHQTNISELKRTFLETSTDTAVTNEWEKRLSTSPVRLAARQEDAPMIEPLVPPEE |  |
| 01:9606  | 49308              | NM_001281533   | EPB41L3  | Homo_sapiens       | TQDDLMLKHQTNISELKRTFLETSTDTAVTNEWEKRLSTSPVRLAARQEDAPMIEPLVPPEE |  |
| 01:9606  | 49308              | NM_001281534   | EPB41L3  | Homo_sapiens       | TQDDLMLKHQTNISELKRTFLETSTDTAVTNEWEKRLSTSPVRLAARQEDAPMIEPLVPPEE |  |
| 01:9606  | 49308              | NM_001281535   | EPB41L3  | Homo_sapiens       | TQDDLMLKHQTNISELKRTFLETSTDTAVTNEWEKRLSTSPVRLAARQEDAPMIEPLVPPEE |  |
| 01:9606  | 49308              | NM_012307      | EPB41L3  | Homo_sapiens       | TQDDLMLKHQTNISELKRTFLETSTDTAVTNEWEKRLSTSPVRLAARQEDAPMIEPLVPPEE |  |
| 04:9913  | 49308              | NM_001206169   | EPB41L3  | Bos_taurus         | TQDDLMLKHQTNISELKRTFLETSTDTAITNEWEKRLSTSPVRLAARQEDAPMIEPLVPPEE |  |
| 06:10116 | 49308              | NM_053927      | Epb41l3  | Rattus_norvegicus  | TQDELVKHQTNISELKRTFLETSTETALTNEWEKRLSTSPVRLAARQEDAPMIEPLVPPEE  |  |
| 07:10090 | 49308              | NM_013813      | Epb4.1l3 | Mus_musculus       | TQDELMKHQTNISELKRTFLETSTETALTNEWEKRLSTSPVRLAARQEDAPMIEPLVPPEE  |  |
| 09:8364  | 49308              | NM_001078705   | epb41l3  | Xenopus_tropicalis | NQEELMLKHQTNISELKRTFLETSTDTTGGGEWKRLSTSPVRLVMRHEAPMIEPLVPPEE   |  |
| 10:7955  | 49308              | NM_214812      | epb41l3b | Danio_rerio        | -----                                                          |  |

```
00:1 | Ac-MEQFAAAAAHSTVPR
01:9606 | 49308 | 0#NP_001268462 | EPB41L3 | Homo_sapiens
01:9606 | 49308 | 0#NP_001268463 | EPB41L3 | Homo_sapiens
01:9606 | 49308 | 0#NP_001268464 | EPB41L3 | Homo_sapiens
01:9606 | 49308 | 0#NP_036439 | EPB41L3 | Homo_sapiens
```

```

-----
-----
HKETEITPEDGED
HKETEITPEDGED
HKETEITPEDGED

```

|          |       |              |          |                    |               |
|----------|-------|--------------|----------|--------------------|---------------|
| 01:9606  | 49308 | NM_001281533 | EPB41L3  | Homo_sapiens       | -----         |
| 01:9606  | 49308 | NM_001281534 | EPB41L3  | Homo_sapiens       | HKETEITPEDGED |
| 01:9606  | 49308 | NM_001281535 | EPB41L3  | Homo_sapiens       | HKETEITPEDGED |
| 01:9606  | 49308 | NM_012307    | EPB41L3  | Homo_sapiens       | HKETEITPEDGED |
| 04:9913  | 49308 | NM_001206169 | EPB41L3  | Bos_taurus         | HKETEISPEDGED |
| 06:10116 | 49308 | NM_053927    | Epb41l3  | Rattus_norvegicus  | HKETEITPEDGED |
| 07:10090 | 49308 | NM_013813    | Epb4.1l3 | Mus_musculus       | HKETEITPEDGED |
| 09:8364  | 49308 | NM_001078705 | epb41l3  | Xenopus_tropicalis | -----         |
| 10:7955  | 49308 | NM_214812    | epb41l3b | Danio_rerio        | HKETEISATEAQA |

*KAT7*

Ac-MEPAGATVPAAAAAAR

```
00:1|Ac-MEPAGATVPAAAAAAR-----
01:9606|5134|0#NP_001186084|KAT7|Homo_sapiens-----
01:9606|5134|0#NP_001186085|KAT7|Homo_sapiens-----
01:9606|5134|0#NP_001186086|KAT7|Homo_sapiens-----
01:9606|5134|0#NP_001186087|KAT7|Homo_sapiens-----
01:9606|5134|0#NP_008998|KAT7|Homo_sapiens-----
01:9606|5134|NM_001199155|KAT7|Homo_sapiens-----
01:9606|5134|NM_001199156|KAT7|Homo_sapiens-----
01:9606|5134|NM_001199157|KAT7|Homo_sapiens-----
01:9606|5134|NM_001199158|KAT7|Homo_sapiens-----
01:9606|5134|NM_007067|KAT7|Homo_sapiens-----
04:9913|5134|NM_001076818|KAT7|Bos_taurus-----
06:10116|5134|NM_181081|Kat7|Rattus_norvegicus-----
07:10090|5134|NM_001195003|Kat7|Mus_musculus-----
07:10090|5134|NM_001195004|Kat7|Mus_musculus-----
07:10090|5134|NM_177619|Kat7|Mus_musculus-----
08:9031|5134|NM_001031341|MYST2|Gallus_gallus-----
09:8364|5134|NM_001015919|kat7|Xenopus_tropicalis-----
12:7227|5134|NM_001259001|chm|Drosophila_melanogasterHPPLATLIKIQENRHFVCVQILKKTFCATKMALESGSSSSSESGSSSTSGTSSSETGSSSD
12:7227|5134|NM_001273263|chm|Drosophila_melanogasterHPPLATLIKIQENRHFVCVQILKKTFCATKMALESGSSSSSESGSSSTSGTSSSETGSSSD
12:7227|5134|NM_135273|chm|Drosophila_melanogasterHPPLATLIKIQENRHFVCVQILKKTFCATKMALESGSSSSSESGSSSTSGTSSSETGSSSD
```

|          |                     |                                          |                                                             |
|----------|---------------------|------------------------------------------|-------------------------------------------------------------|
| 00:1     | Ac-MEPAGATVPAAAAAAR |                                          |                                                             |
| 01:9606  | 5134                | 0#NP_001186084 KAT7 Homo_sapiens         |                                                             |
| 01:9606  | 5134                | 0#NP_001186085 KAT7 Homo_sapiens         |                                                             |
| 01:9606  | 5134                | 0#NP_001186086 KAT7 Homo_sapiens         |                                                             |
| 01:9606  | 5134                | 0#NP_001186087 KAT7 Homo_sapiens         |                                                             |
| 01:9606  | 5134                | 0#NP_008998 KAT7 Homo_sapiens            |                                                             |
| 01:9606  | 5134                | NM_001199155 KAT7 Homo_sapiens           |                                                             |
| 01:9606  | 5134                | NM_001199156 KAT7 Homo_sapiens           |                                                             |
| 01:9606  | 5134                | NM_001199157 KAT7 Homo_sapiens           |                                                             |
| 01:9606  | 5134                | NM_001199158 KAT7 Homo_sapiens           |                                                             |
| 01:9606  | 5134                | NM_007067 KAT7 Homo_sapiens              |                                                             |
| 04:9913  | 5134                | NM_001076818 KAT7 Bos_taurus             |                                                             |
| 06:10116 | 5134                | NM_181081 Kat7 Rattus_norvegicus         |                                                             |
| 07:10090 | 5134                | NM_001195003 Kat7 Mus_musculus           |                                                             |
| 07:10090 | 5134                | NM_001195004 Kat7 Mus_musculus           |                                                             |
| 07:10090 | 5134                | NM_177619 Kat7 Mus_musculus              |                                                             |
| 08:9031  | 5134                | NM_001031341 MYST2 Gallus_gallus         |                                                             |
| 09:8364  | 5134                | NM_001015919 kat7 Xenopus_tropicalis     |                                                             |
| 12:7227  | 5134                | NM_001259001 chm Drosophila_melanogaster | TDSSSATPEEKPSTNSSAKSQTTQQTNSGNAQRRKPVPAASEDKPKPSVAPSSKKVNN  |
| 12:7227  | 5134                | NM_001273263 chm Drosophila_melanogaster | TDSSSATPEEKPSTNSSAKSQTTQQTNSGNAQRRKPVPAASEDKPKPSVAPSSKKVNN  |
| 12:7227  | 5134                | NM_135273 chm Drosophila_melanogaster    | TDSSSATPEEEKPSTNSSAKSQTTQQTNSGNAQRRKPVPAASEDKPKPSVAPSSKKVNN |

|          |                                               |                                                             |                          |
|----------|-----------------------------------------------|-------------------------------------------------------------|--------------------------|
| 00:1     | Ac-MEPAGATVPAAAAAAR                           |                                                             | -----                    |
| 01:9606  | 5134 0#NP_001186084 KAT7 Homo_sapiens         |                                                             | -----                    |
| 01:9606  | 5134 0#NP_001186085 KAT7 Homo_sapiens         |                                                             | -----                    |
| 01:9606  | 5134 0#NP_001186086 KAT7 Homo_sapiens         |                                                             | -----                    |
| 01:9606  | 5134 0#NP_001186087 KAT7 Homo_sapiens         |                                                             | -----                    |
| 01:9606  | 5134 0#NP_008998 KAT7 Homo_sapiens            |                                                             | -----                    |
| 01:9606  | 5134 NM_001199155 KAT7 Homo_sapiens           |                                                             | -----RETQPEVKEKAL----QPA |
| 01:9606  | 5134 NM_001199156 KAT7 Homo_sapiens           |                                                             | -----RETQPEVKEKAL----QPA |
| 01:9606  | 5134 NM_001199157 KAT7 Homo_sapiens           |                                                             | -----RETQPEVKEKAL----QPA |
| 01:9606  | 5134 NM_001199158 KAT7 Homo_sapiens           |                                                             | -----RETQPEVKEKAL----QPA |
| 01:9606  | 5134 NM_007067 KAT7 Homo_sapiens              |                                                             | -----RETQPEVKEKAL----QPA |
| 04:9913  | 5134 NM_001076818 KAT7 Bos_taurus             |                                                             | -----                    |
| 06:10116 | 5134 NM_181081 Kat7 Rattus_norvegicus         |                                                             | -----                    |
| 07:10090 | 5134 NM_001195003 Kat7 Mus_musculus           |                                                             | -----                    |
| 07:10090 | 5134 NM_001195004 Kat7 Mus_musculus           |                                                             | -----                    |
| 07:10090 | 5134 NM_177619 Kat7 Mus_musculus              |                                                             | -----                    |
| 08:9031  | 5134 NM_001031341 MYST2 Gallus_gallus         |                                                             | -----PG                  |
| 09:8364  | 5134 NM_001015919 kat7 Xenopus_tropicalis     |                                                             | -----                    |
| 12:7227  | 5134 NM_001259001 chm Drosophila_melanogaster | PPKSKLSSDDDEYEDSAPPAKKNSRAMGSSTVTAAAAASAARRKPASVNKPSNPANKPS |                          |
| 12:7227  | 5134 NM_001273263 chm Drosophila_melanogaster | PPKSKLSSDDDEYEDSAPPAKKNSRAMGSSTVTAAAAASAARRKPASVNKPSNPANKPS |                          |
| 12:7227  | 5134 NM_135273 chm Drosophila_melanogaster    | PPKSKLSSDDDEYEDSAPPAKKNSRAMGSSTVTAAAAASAARRKPASVNKPSNPANKP  |                          |

```

00:1|Ac-MEPAGATVPAAAAAAR-----MEPAGATVPAAAAAAR-I-----
01:9606|5134|0#NP_001186084|KAT7|Homo_sapiens-----
01:9606|5134|0#NP_001186085|KAT7|Homo_sapiens-----
01:9606|5134|0#NP_001186086|KAT7|Homo_sapiens-----
01:9606|5134|0#NP_001186087|KAT7|Homo_sapiens-----
01:9606|5134|0#NP_008998|KAT7|Homo_sapiens-----
01:9606|5134|NM_00119155|KAT7|Homo_sapiens-----
01:9606|5134|NM_00119156|KAT7|Homo_sapiens-----
01:9606|5134|NM_00119157|KAT7|Homo_sapiens-----
01:9606|5134|NM_00119158|KAT7|Homo_sapiens-----
01:9606|5134|NM_007067|KAT7|Homo_sapiens-----
04:9913|5134|NM_001076818|KAT7|Bos_taurus-----
06:10116|5134|NM_181081|KAT7|Rattus_norvegicus-----
07:10090|5134|NM_001195003|KAT7|Mus_musculus-----
-----TLR--GRRHL--GSSAGFG-----TATEAATEPAGAPVPAAGAAAARIGT-----

```







|         |  |      |  |              |  |     |  |                         |  |                                                             |
|---------|--|------|--|--------------|--|-----|--|-------------------------|--|-------------------------------------------------------------|
| 12:7227 |  | 5134 |  | NM_001273263 |  | chm |  | Drosophila_melanogaster |  | TLQALGMMKYWKGHIVLKKQDVLDEYEERVKR-RGTFPKIDDSCLRWQPFINIQPSSSP |
| 12:7227 |  | 5134 |  | NM_135273    |  | chm |  | Drosophila_melanogaster |  | TLQALGMMKYWKGHIVLKKQDVLDEYEERVKR-RGTFPKIDDSCLRWQPFINIQPSSSP |

*ANKS1B*

Ac-AGSFDSNFPR

CLUSTAL O(1.2.1) multiple sequence alignment

|                    |       |                |        |                   |                                                              |
|--------------------|-------|----------------|--------|-------------------|--------------------------------------------------------------|
| 00:1 Ac-AGSFDSNFPR |       |                |        |                   | -----                                                        |
| 01:9606            | 51570 | 0#NP_001190994 | ANKS1B | Homo_sapiens      | -----                                                        |
| 01:9606            | 51570 | 0#NP_001190995 | ANKS1B | Homo_sapiens      | -----                                                        |
| 01:9606            | 51570 | 0#NP_001190996 | ANKS1B | Homo_sapiens      | -----                                                        |
| 01:9606            | 51570 | 0#NP_001190997 | ANKS1B | Homo_sapiens      | -----                                                        |
| 01:9606            | 51570 | 0#NP_001190998 | ANKS1B | Homo_sapiens      | -----                                                        |
| 01:9606            | 51570 | 0#NP_001190999 | ANKS1B | Homo_sapiens      | -----                                                        |
| 01:9606            | 51570 | 0#NP_001191008 | ANKS1B | Homo_sapiens      | -----                                                        |
| 01:9606            | 51570 | 0#NP_001191009 | ANKS1B | Homo_sapiens      | -----                                                        |
| 01:9606            | 51570 | 0#NP_001191010 | ANKS1B | Homo_sapiens      | -----                                                        |
| 01:9606            | 51570 | 0#NP_064525    | ANKS1B | Homo_sapiens      | -----                                                        |
| 01:9606            | 51570 | 0#NP_690001    | ANKS1B | Homo_sapiens      | ----MGKDQELLEAARTGNVALVEKLLSGRKGGILGGSGGPLPLSNLLSIWRGPNVNCTD |
| 01:9606            | 51570 | 0#NP_858056    | ANKS1B | Homo_sapiens      | -----                                                        |
| 01:9606            | 51570 | NM_001204065   | ANKS1B | Homo_sapiens      | -----                                                        |
| 01:9606            | 51570 | NM_001204066   | ANKS1B | Homo_sapiens      | -----                                                        |
| 01:9606            | 51570 | NM_001204067   | ANKS1B | Homo_sapiens      | -----                                                        |
| 01:9606            | 51570 | NM_001204068   | ANKS1B | Homo_sapiens      | -----                                                        |
| 01:9606            | 51570 | NM_001204069   | ANKS1B | Homo_sapiens      | -----                                                        |
| 01:9606            | 51570 | NM_001204070   | ANKS1B | Homo_sapiens      | -----                                                        |
| 01:9606            | 51570 | NM_001204079   | ANKS1B | Homo_sapiens      | -----                                                        |
| 01:9606            | 51570 | NM_001204080   | ANKS1B | Homo_sapiens      | -----                                                        |
| 01:9606            | 51570 | NM_001204081   | ANKS1B | Homo_sapiens      | -----                                                        |
| 01:9606            | 51570 | NM_020140      | ANKS1B | Homo_sapiens      | -----                                                        |
| 01:9606            | 51570 | NM_152788      | ANKS1B | Homo_sapiens      | --ETMGKDQELLEAARTGNVALVEKLLSGRKGGILGGSGGPLPLSNLLSIWRGPNVNCTD |
| 01:9606            | 51570 | NM_181670      | ANKS1B | Homo_sapiens      | -----                                                        |
| 06:10116           | 51570 | NM_001271371   | Anks1b | Rattus_norvegicus | ----MGKDQELLEAARTGNVALVEKLLSGRKGGILGGSGGPLPLSNLLSIWRGPNVNCTD |
| 07:10090           | 51570 | NM_001128086   | Anks1b | Mus_musculus      | --ETMGKDQELLEAARTGNVALVEKLLSGRKGGILGGSGGPLPLSNLLSIWRGPNVNCTD |
| 07:10090           | 51570 | NM_001177396   | Anks1b | Mus_musculus      | -----                                                        |
| 07:10090           | 51570 | NM_001177397   | Anks1b | Mus_musculus      | -----                                                        |
| 07:10090           | 51570 | NM_001177398   | Anks1b | Mus_musculus      | -----                                                        |
| 07:10090           | 51570 | NM_181398      | Anks1b | Mus_musculus      | -----                                                        |
| 08:9031            | 51570 | NM_001252062   | ANKS1B | Gallus_gallus     | RSPAMGKDQELLEAARTGNVALVEKLLSGRKGGILGSGSGAIPLSLLSIWRGPNINCTD  |
| 08:9031            | 51570 | NM_001252062   | ANKS1B | Gallus_gallus     | RSPAMGKDQELLEAARTGNVALVEKLLSGRKGGILGSGSGAIPLSLLSIWRGPNINCTD  |
| 10:7955            | 51570 | NM_001100017   | anks1b | Danio_rerio       | ----MGKEQELLEAARTGNVGLVEKLLSGKK-GLLGSGSGSIPLPGLLSMWRGLNVNCVD |

|                    |       |                |        |                   |                                                              |
|--------------------|-------|----------------|--------|-------------------|--------------------------------------------------------------|
| 00:1 Ac-AGSFDSNFPR |       |                |        |                   | -----                                                        |
| 01:9606            | 51570 | 0#NP_001190994 | ANKS1B | Homo_sapiens      | -----                                                        |
| 01:9606            | 51570 | 0#NP_001190995 | ANKS1B | Homo_sapiens      | -----                                                        |
| 01:9606            | 51570 | 0#NP_001190996 | ANKS1B | Homo_sapiens      | -----                                                        |
| 01:9606            | 51570 | 0#NP_001190997 | ANKS1B | Homo_sapiens      | -----                                                        |
| 01:9606            | 51570 | 0#NP_001190998 | ANKS1B | Homo_sapiens      | -----                                                        |
| 01:9606            | 51570 | 0#NP_001190999 | ANKS1B | Homo_sapiens      | -----                                                        |
| 01:9606            | 51570 | 0#NP_001191008 | ANKS1B | Homo_sapiens      | -----                                                        |
| 01:9606            | 51570 | 0#NP_001191009 | ANKS1B | Homo_sapiens      | -----                                                        |
| 01:9606            | 51570 | 0#NP_001191010 | ANKS1B | Homo_sapiens      | -----                                                        |
| 01:9606            | 51570 | 0#NP_064525    | ANKS1B | Homo_sapiens      | -----                                                        |
| 01:9606            | 51570 | 0#NP_690001    | ANKS1B | Homo_sapiens      | SSGYTALHHAALNGHKDIVLKLLQYEASTNVADNKGYPFIHLAAWKGDVEIVKILIHGHP |
| 01:9606            | 51570 | 0#NP_858056    | ANKS1B | Homo_sapiens      | -----                                                        |
| 01:9606            | 51570 | NM_001204065   | ANKS1B | Homo_sapiens      | -----                                                        |
| 01:9606            | 51570 | NM_001204066   | ANKS1B | Homo_sapiens      | -----                                                        |
| 01:9606            | 51570 | NM_001204067   | ANKS1B | Homo_sapiens      | -----                                                        |
| 01:9606            | 51570 | NM_001204068   | ANKS1B | Homo_sapiens      | -----                                                        |
| 01:9606            | 51570 | NM_001204069   | ANKS1B | Homo_sapiens      | -----                                                        |
| 01:9606            | 51570 | NM_001204070   | ANKS1B | Homo_sapiens      | -----                                                        |
| 01:9606            | 51570 | NM_001204079   | ANKS1B | Homo_sapiens      | -----                                                        |
| 01:9606            | 51570 | NM_001204080   | ANKS1B | Homo_sapiens      | -----                                                        |
| 01:9606            | 51570 | NM_001204081   | ANKS1B | Homo_sapiens      | -----                                                        |
| 01:9606            | 51570 | NM_020140      | ANKS1B | Homo_sapiens      | -----                                                        |
| 01:9606            | 51570 | NM_152788      | ANKS1B | Homo_sapiens      | SSGYTALHHAALNGHKDIVLKLLQYEASTNVADNKGYPFIHLAAWKGDVEIVKILIHGHP |
| 01:9606            | 51570 | NM_181670      | ANKS1B | Homo_sapiens      | -----                                                        |
| 06:10116           | 51570 | NM_001271371   | Anks1b | Rattus_norvegicus | SSGYTALHHAALNGHKDIVLKLLQFEASTNVADNKGYPFIHLAAWKGDVEIVKILIHGHP |
| 07:10090           | 51570 | NM_001128086   | Anks1b | Mus_musculus      | SSGYTALHHAALNGHKDIVLKLLQYEASTNVADNKGYPFIHLAAWKGDVEIVKILIHGHP |
| 07:10090           | 51570 | NM_001177396   | Anks1b | Mus_musculus      | -----                                                        |
| 07:10090           | 51570 | NM_001177397   | Anks1b | Mus_musculus      | -----                                                        |
| 07:10090           | 51570 | NM_001177398   | Anks1b | Mus_musculus      | -----                                                        |
| 07:10090           | 51570 | NM_181398      | Anks1b | Mus_musculus      | -----                                                        |
| 08:9031            | 51570 | NM_001252062   | ANKS1B | Gallus_gallus     | SSGYTALHHAALNGHKDIVFKLLQYEASTNVADNKGYPFIHLAAWRGDVDIVKIFIHHGP |
| 08:9031            | 51570 | NM_001252062   | ANKS1B | Gallus_gallus     | SSGYTALHHAALNGHKDIVLKLLQYEASTNVADNKGYPFIHLAAWRGDVDIVKILIHGHP |
| 10:7955            | 51570 | NM_001100017   | anks1b | Danio_rerio       | GSGYTPLHHAASLNGHRDVLKLLQFEASTNVSDSKGCFPLHLAAWRGDVDIVQILIHGHP |

|                    |       |                |        |              |       |
|--------------------|-------|----------------|--------|--------------|-------|
| 00:1 Ac-AGSFDSNFPR |       |                |        |              | ----- |
| 01:9606            | 51570 | 0#NP_001190994 | ANKS1B | Homo_sapiens | ----- |
| 01:9606            | 51570 | 0#NP_001190995 | ANKS1B | Homo_sapiens | ----- |
| 01:9606            | 51570 | 0#NP_001190996 | ANKS1B | Homo_sapiens | ----- |
| 01:9606            | 51570 | 0#NP_001190997 | ANKS1B | Homo_sapiens | ----- |
| 01:9606            | 51570 | 0#NP_001190998 | ANKS1B | Homo_sapiens | ----- |
| 01:9606            | 51570 | 0#NP_001190999 | ANKS1B | Homo_sapiens | ----- |
| 01:9606            | 51570 | 0#NP_001191008 | ANKS1B | Homo_sapiens | ----- |
| 01:9606            | 51570 | 0#NP_001191009 | ANKS1B | Homo_sapiens | ----- |
| 01:9606            | 51570 | 0#NP_001191010 | ANKS1B | Homo_sapiens | ----- |
| 01:9606            | 51570 | 0#NP_064525    | ANKS1B | Homo_sapiens | ----- |

|          |       |              |        |                   |                                                              |
|----------|-------|--------------|--------|-------------------|--------------------------------------------------------------|
| 01:9606  | 51570 | 0#NP_690001  | ANKS1B | Homo_sapiens      | SHSRVNEQNNENETALHCAAQYGHSEVVAVLLEELTDPTIRNSKLETPLDLAALYGRRLV |
| 01:9606  | 51570 | 0#NP_858056  | ANKS1B | Homo_sapiens      | -----                                                        |
| 01:9606  | 51570 | NM_001204065 | ANKS1B | Homo_sapiens      | -----                                                        |
| 01:9606  | 51570 | NM_001204066 | ANKS1B | Homo_sapiens      | -----                                                        |
| 01:9606  | 51570 | NM_001204067 | ANKS1B | Homo_sapiens      | -----                                                        |
| 01:9606  | 51570 | NM_001204068 | ANKS1B | Homo_sapiens      | -----                                                        |
| 01:9606  | 51570 | NM_001204069 | ANKS1B | Homo_sapiens      | -----                                                        |
| 01:9606  | 51570 | NM_001204070 | ANKS1B | Homo_sapiens      | -----                                                        |
| 01:9606  | 51570 | NM_001204079 | ANKS1B | Homo_sapiens      | -----                                                        |
| 01:9606  | 51570 | NM_001204080 | ANKS1B | Homo_sapiens      | -----                                                        |
| 01:9606  | 51570 | NM_001204081 | ANKS1B | Homo_sapiens      | -----                                                        |
| 01:9606  | 51570 | NM_020140    | ANKS1B | Homo_sapiens      | -----                                                        |
| 01:9606  | 51570 | NM_152788    | ANKS1B | Homo_sapiens      | SHSRVNEQNNENETALHCAAQYGHSEVVAVLLEELTDPTIRNSKLETPLDLAALYGRRLV |
| 01:9606  | 51570 | NM_181670    | ANKS1B | Homo_sapiens      | -----                                                        |
| 06:10116 | 51570 | NM_001271371 | Anks1b | Rattus_norvegicus | SHSRVNEQNNENETALHCAAQYGHSEVVAVLLEELTDPTIRNSKLETPLDLAALYGRRLV |
| 07:10090 | 51570 | NM_001128086 | Anks1b | Mus_musculus      | SHSRVNEQNNENETALHCAAQYGHSEVVAVLLEELTDPTIRNSKLETPLDLAALYGRRLV |
| 07:10090 | 51570 | NM_001177396 | Anks1b | Mus_musculus      | -----                                                        |
| 07:10090 | 51570 | NM_001177397 | Anks1b | Mus_musculus      | -----                                                        |
| 07:10090 | 51570 | NM_001177398 | Anks1b | Mus_musculus      | -----                                                        |
| 07:10090 | 51570 | NM_181398    | Anks1b | Mus_musculus      | -----                                                        |
| 08:9031  | 51570 | NM_001252062 | ANKS1B | Gallus_gallus     | SHSRVNEQNNENETALHCAAQYGHSEVVAVLLEELTDPTIRNNKLETPLDLAALYGRRLV |
| 08:9031  | 51570 | NM_001252062 | ANKS1B | Gallus_gallus     | SHSRVNEQNNENETALHCAAQYGHSEVVAVLLEELTDPTIRNNKLETPLDLAALYGRRLV |
| 10:7955  | 51570 | NM_001100017 | anks1b | Danio_rerio       | SHSRVNEQNLKETALHCAAQYGHSEVVRVLLQELTDPMSRNSRGLETPLDLAALYGRQLV |

|          |               |                |        |                   |                                                               |
|----------|---------------|----------------|--------|-------------------|---------------------------------------------------------------|
| 00:1     | Ac-AGSFDSNFPR |                |        |                   | -----                                                         |
| 01:9606  | 51570         | 0#NP_001190994 | ANKS1B | Homo_sapiens      | -----                                                         |
| 01:9606  | 51570         | 0#NP_001190995 | ANKS1B | Homo_sapiens      | -----                                                         |
| 01:9606  | 51570         | 0#NP_001190996 | ANKS1B | Homo_sapiens      | -----                                                         |
| 01:9606  | 51570         | 0#NP_001190997 | ANKS1B | Homo_sapiens      | -----                                                         |
| 01:9606  | 51570         | 0#NP_001190998 | ANKS1B | Homo_sapiens      | -----                                                         |
| 01:9606  | 51570         | 0#NP_001190999 | ANKS1B | Homo_sapiens      | -----                                                         |
| 01:9606  | 51570         | 0#NP_001191008 | ANKS1B | Homo_sapiens      | -----                                                         |
| 01:9606  | 51570         | 0#NP_001191009 | ANKS1B | Homo_sapiens      | -----                                                         |
| 01:9606  | 51570         | 0#NP_001191010 | ANKS1B | Homo_sapiens      | -----                                                         |
| 01:9606  | 51570         | 0#NP_064525    | ANKS1B | Homo_sapiens      | -----                                                         |
| 01:9606  | 51570         | 0#NP_690001    | ANKS1B | Homo_sapiens      | VKMIISAHPNLMSCNTRKHTPLHLAARNGHKAVVQVLLLEAGMDVSCQTEKGSALHEAALF |
| 01:9606  | 51570         | 0#NP_858056    | ANKS1B | Homo_sapiens      | -----                                                         |
| 01:9606  | 51570         | NM_001204065   | ANKS1B | Homo_sapiens      | -----                                                         |
| 01:9606  | 51570         | NM_001204066   | ANKS1B | Homo_sapiens      | -----                                                         |
| 01:9606  | 51570         | NM_001204067   | ANKS1B | Homo_sapiens      | -----                                                         |
| 01:9606  | 51570         | NM_001204068   | ANKS1B | Homo_sapiens      | -----                                                         |
| 01:9606  | 51570         | NM_001204069   | ANKS1B | Homo_sapiens      | -----                                                         |
| 01:9606  | 51570         | NM_001204070   | ANKS1B | Homo_sapiens      | -----                                                         |
| 01:9606  | 51570         | NM_001204079   | ANKS1B | Homo_sapiens      | -----                                                         |
| 01:9606  | 51570         | NM_001204080   | ANKS1B | Homo_sapiens      | -----                                                         |
| 01:9606  | 51570         | NM_001204081   | ANKS1B | Homo_sapiens      | -----                                                         |
| 01:9606  | 51570         | NM_020140      | ANKS1B | Homo_sapiens      | -----                                                         |
| 01:9606  | 51570         | NM_152788      | ANKS1B | Homo_sapiens      | VKMIISAHPNLMSCNTRKHTPLHLAARNGHKAVVQVLLLEAGMDVSCQTEKGSALHEAALF |
| 01:9606  | 51570         | NM_181670      | ANKS1B | Homo_sapiens      | -----                                                         |
| 06:10116 | 51570         | NM_001271371   | Anks1b | Rattus_norvegicus | VKMIISAHPNLMSCNTRKHTPLHLAARNGHKAVVQVLLLEAGMDVSCQTEKGSALHEAALF |
| 07:10090 | 51570         | NM_001128086   | Anks1b | Mus_musculus      | VKMIISAHPNLMSCNTRKHTPLHLAARNGHKAVVQVLLLEAGMDVSCQTEKGSALHEAALF |
| 07:10090 | 51570         | NM_001177396   | Anks1b | Mus_musculus      | -----                                                         |
| 07:10090 | 51570         | NM_001177397   | Anks1b | Mus_musculus      | -----                                                         |
| 07:10090 | 51570         | NM_001177398   | Anks1b | Mus_musculus      | -----                                                         |
| 07:10090 | 51570         | NM_181398      | Anks1b | Mus_musculus      | -----                                                         |
| 08:9031  | 51570         | NM_001252062   | ANKS1B | Gallus_gallus     | VKMIIKAYPNLMNCNTRKHTPLHLAARNGHKAVVQVLLLEAGMDVSCQTEKGSALHEAALF |
| 08:9031  | 51570         | NM_001252062   | ANKS1B | Gallus_gallus     | VKMIIKAYPNLMNCNTRKHTPLHLAARNGHKAVVQVLLLEAGMDVSCQTEKGSALHEAALF |
| 10:7955  | 51570         | NM_001100017   | anks1b | Danio_rerio       | VRMLLTAHPNLMSCNTRKHTPLHLAARNGHYATVQVLLLEADMVNTQTEKGSALHEAALF  |

|         |               |                |        |              |                                                               |
|---------|---------------|----------------|--------|--------------|---------------------------------------------------------------|
| 00:1    | Ac-AGSFDSNFPR |                |        |              | -----                                                         |
| 01:9606 | 51570         | 0#NP_001190994 | ANKS1B | Homo_sapiens | -----                                                         |
| 01:9606 | 51570         | 0#NP_001190995 | ANKS1B | Homo_sapiens | -----                                                         |
| 01:9606 | 51570         | 0#NP_001190996 | ANKS1B | Homo_sapiens | -----                                                         |
| 01:9606 | 51570         | 0#NP_001190997 | ANKS1B | Homo_sapiens | -----                                                         |
| 01:9606 | 51570         | 0#NP_001190998 | ANKS1B | Homo_sapiens | -----                                                         |
| 01:9606 | 51570         | 0#NP_001190999 | ANKS1B | Homo_sapiens | -----                                                         |
| 01:9606 | 51570         | 0#NP_001191008 | ANKS1B | Homo_sapiens | -----                                                         |
| 01:9606 | 51570         | 0#NP_001191009 | ANKS1B | Homo_sapiens | -----                                                         |
| 01:9606 | 51570         | 0#NP_001191010 | ANKS1B | Homo_sapiens | -----                                                         |
| 01:9606 | 51570         | 0#NP_064525    | ANKS1B | Homo_sapiens | -----                                                         |
| 01:9606 | 51570         | 0#NP_690001    | ANKS1B | Homo_sapiens | GKVDVVRVLLLETGIDANIKDSLGRTVLDILKEHPSQKSLQIATLLQEYLEGVGRST-VLE |
| 01:9606 | 51570         | 0#NP_858056    | ANKS1B | Homo_sapiens | -----                                                         |
| 01:9606 | 51570         | NM_001204065   | ANKS1B | Homo_sapiens | -----                                                         |
| 01:9606 | 51570         | NM_001204066   | ANKS1B | Homo_sapiens | -----                                                         |
| 01:9606 | 51570         | NM_001204067   | ANKS1B | Homo_sapiens | -----                                                         |
| 01:9606 | 51570         | NM_001204068   | ANKS1B | Homo_sapiens | -----                                                         |
| 01:9606 | 51570         | NM_001204069   | ANKS1B | Homo_sapiens | -----                                                         |
| 01:9606 | 51570         | NM_001204070   | ANKS1B | Homo_sapiens | -----                                                         |
| 01:9606 | 51570         | NM_001204079   | ANKS1B | Homo_sapiens | -----                                                         |
| 01:9606 | 51570         | NM_001204080   | ANKS1B | Homo_sapiens | -----                                                         |
| 01:9606 | 51570         | NM_001204081   | ANKS1B | Homo_sapiens | -----                                                         |
| 01:9606 | 51570         | NM_020140      | ANKS1B | Homo_sapiens | -----                                                         |
| 01:9606 | 51570         | NM_152788      | ANKS1B | Homo_sapiens | GKVDVVRVLLLETGIDANIKDSLGRTVLDILKEHPSQKSLQIATLLQEYLEGVGRST-VLE |
| 01:9606 | 51570         | NM_181670      | ANKS1B | Homo_sapiens | -----                                                         |

06:10116|51570|NM\_001271371|Anks1b|Rattus\_norvegicus  
07:10090|51570|NM\_001128086|Anks1b|Mus\_musculus  
07:10090|51570|NM\_001177396|Anks1b|Mus\_musculus  
07:10090|51570|NM\_001177397|Anks1b|Mus\_musculus  
07:10090|51570|NM\_001177398|Anks1b|Mus\_musculus  
07:10090|51570|NM\_181398|Anks1b|Mus\_musculus  
08:9031|51570|NM\_001252062|ANKS1B|Gallus\_gallus  
08:9031|51570|NM\_001252062|ANKS1B|Gallus\_gallus  
10:7955|51570|NM\_001100017|anks1b|Danio\_rerio

00:1|Ac-AGSFDSNFPR

01:9606|51570|0#NP\_001190994|ANKS1B|Homo\_sapiens  
01:9606|51570|0#NP\_001190995|ANKS1B|Homo\_sapiens  
01:9606|51570|0#NP\_001190996|ANKS1B|Homo\_sapiens  
01:9606|51570|0#NP\_001190997|ANKS1B|Homo\_sapiens  
01:9606|51570|0#NP\_001190998|ANKS1B|Homo\_sapiens  
01:9606|51570|0#NP\_001190999|ANKS1B|Homo\_sapiens  
01:9606|51570|0#NP\_001191008|ANKS1B|Homo\_sapiens  
01:9606|51570|0#NP\_001191009|ANKS1B|Homo\_sapiens  
01:9606|51570|0#NP\_001191010|ANKS1B|Homo\_sapiens  
01:9606|51570|0#NP\_064525|ANKS1B|Homo\_sapiens  
01:9606|51570|0#NP\_690001|ANKS1B|Homo\_sapiens  
01:9606|51570|0#NP\_858056|ANKS1B|Homo\_sapiens  
01:9606|51570|NM\_001204065|ANKS1B|Homo\_sapiens  
01:9606|51570|NM\_001204066|ANKS1B|Homo\_sapiens  
01:9606|51570|NM\_001204067|ANKS1B|Homo\_sapiens  
01:9606|51570|NM\_001204068|ANKS1B|Homo\_sapiens  
01:9606|51570|NM\_001204069|ANKS1B|Homo\_sapiens  
01:9606|51570|NM\_001204070|ANKS1B|Homo\_sapiens  
01:9606|51570|NM\_001204079|ANKS1B|Homo\_sapiens  
01:9606|51570|NM\_001204080|ANKS1B|Homo\_sapiens  
01:9606|51570|NM\_001204081|ANKS1B|Homo\_sapiens  
01:9606|51570|NM\_020140|ANKS1B|Homo\_sapiens  
01:9606|51570|NM\_152788|ANKS1B|Homo\_sapiens  
01:9606|51570|NM\_181670|ANKS1B|Homo\_sapiens  
06:10116|51570|NM\_001271371|Anks1b|Rattus\_norvegicus  
07:10090|51570|NM\_001128086|Anks1b|Mus\_musculus  
07:10090|51570|NM\_001177396|Anks1b|Mus\_musculus  
07:10090|51570|NM\_001177397|Anks1b|Mus\_musculus  
07:10090|51570|NM\_001177398|Anks1b|Mus\_musculus  
07:10090|51570|NM\_181398|Anks1b|Mus\_musculus  
08:9031|51570|NM\_001252062|ANKS1B|Gallus\_gallus  
08:9031|51570|NM\_001252062|ANKS1B|Gallus\_gallus  
10:7955|51570|NM\_001100017|anks1b|Danio\_rerio

00:1|Ac-AGSFDSNFPR

01:9606|51570|0#NP\_001190994|ANKS1B|Homo\_sapiens  
01:9606|51570|0#NP\_001190995|ANKS1B|Homo\_sapiens  
01:9606|51570|0#NP\_001190996|ANKS1B|Homo\_sapiens  
01:9606|51570|0#NP\_001190997|ANKS1B|Homo\_sapiens  
01:9606|51570|0#NP\_001190998|ANKS1B|Homo\_sapiens  
01:9606|51570|0#NP\_001190999|ANKS1B|Homo\_sapiens  
01:9606|51570|0#NP\_001191008|ANKS1B|Homo\_sapiens  
01:9606|51570|0#NP\_001191009|ANKS1B|Homo\_sapiens  
01:9606|51570|0#NP\_001191010|ANKS1B|Homo\_sapiens  
01:9606|51570|0#NP\_064525|ANKS1B|Homo\_sapiens  
01:9606|51570|0#NP\_690001|ANKS1B|Homo\_sapiens  
01:9606|51570|0#NP\_858056|ANKS1B|Homo\_sapiens  
01:9606|51570|NM\_001204065|ANKS1B|Homo\_sapiens  
01:9606|51570|NM\_001204066|ANKS1B|Homo\_sapiens  
01:9606|51570|NM\_001204067|ANKS1B|Homo\_sapiens  
01:9606|51570|NM\_001204068|ANKS1B|Homo\_sapiens  
01:9606|51570|NM\_001204069|ANKS1B|Homo\_sapiens  
01:9606|51570|NM\_001204070|ANKS1B|Homo\_sapiens  
01:9606|51570|NM\_001204079|ANKS1B|Homo\_sapiens  
01:9606|51570|NM\_001204080|ANKS1B|Homo\_sapiens  
01:9606|51570|NM\_001204081|ANKS1B|Homo\_sapiens  
01:9606|51570|NM\_020140|ANKS1B|Homo\_sapiens  
01:9606|51570|NM\_152788|ANKS1B|Homo\_sapiens  
01:9606|51570|NM\_181670|ANKS1B|Homo\_sapiens  
06:10116|51570|NM\_001271371|Anks1b|Rattus\_norvegicus  
07:10090|51570|NM\_001128086|Anks1b|Mus\_musculus  
07:10090|51570|NM\_001177396|Anks1b|Mus\_musculus  
07:10090|51570|NM\_001177397|Anks1b|Mus\_musculus  
07:10090|51570|NM\_001177398|Anks1b|Mus\_musculus  
07:10090|51570|NM\_181398|Anks1b|Mus\_musculus  
08:9031|51570|NM\_001252062|ANKS1B|Gallus\_gallus  
08:9031|51570|NM\_001252062|ANKS1B|Gallus\_gallus  
10:7955|51570|NM\_001100017|anks1b|Danio\_rerio

00:1|Ac-AGSFDSNFPR

01:9606|51570|0#NP\_001190994|ANKS1B|Homo\_sapiens  
01:9606|51570|0#NP\_001190995|ANKS1B|Homo\_sapiens

GKVDVVRVILLETGIDANIKDSLGRTVLDILKEHPSQKSLQIATLLQDYLEGVGRSVVLEE  
GKVDVVRVILLETGIDANIKDSLGRTVLDILKEHPSQKSLQIATLLQDYLEGAGRSAAVLE  
-----  
-----  
-----  
-----  
GKVEVARILLETGVDNTNIKDSLGRTVLDILKEHPSQQSLQIAALLQEYMETGNAS--VSE  
GKVEVARILLETGVDNTNIKDSLGRTVLDILKEHPSQQSLQIAALLQEYMETGNAS--VSE  
GKMDVQVQLLLDSGIDANIRDCQGRALTDLREHPSQKSQQIASLIHDYMMSDCDRGNFHE

EPVQE--DATQETHISSPVESPSQKTKSETVTGELSKLLDEIKLCQEKDYSFEDLCHTIS

EPVQE--DATQETHISSPVESPSQKTKSETVTGELSKLLDEIKLCQEKDYSFEDLCHTIS

EHAQE--DTAQETRLSSPAQSPSQKTKSETVTGELSKLLDEIKLCQEKDYSFEDLCHTIS  
EHAQE--DTAQETHLSSPAESP-QKTKSETVTGELSKLLDEIKLCQEKDYSFEDLCHTIS

ERPLE--GAEHQSCILSPEVPPSPKAKSEAVTGELSKLLDEIKLCQEKEYSFEDLSHTIS  
ERPLE--GAEHQSCILSPEVPPSPKAKSEAVTGELSKLLDEIKLCQEKEYSFEDLSHTIS  
DLARHRPIPTPRTSIPSPVPSPLRHKNDAVTGELSKLLNEIKICRDKDCSFEELCQTIS

DHYLDN--LSKISEEELGKNQSQSVRT--SSTINLSPGEVEEEDDDENTCGPSGLWEALT

DHYLDN--LSKISEEELGKNQSQSVRT--SSTINLSPGEVEEEDDDENTCGPSGLWEALT

DHYLDN--LSKISEEELGKNQSQSVRT--SSTINLSPGEVEEEDDDPNSCGPTGLWEALT  
DHYLDN--LSKISEEELGKNQSQSVRT--SSTINLSPGEVEEEDDDPNSCGPTGLWEALT

DHFLDN--FSKISEEELMTSGIQTKLNVRPSTCLSPREEEEDDGENTCGPSGLWEALT  
DHFLDN--FSKISEEELMTSGIQTKLNVRPSTCLSPREEEEDDGENTCGPSGLWEALT  
SHSQSMESFGSGLSDEERNGLTLTRINKRPTPP----LPPALEEEEEKSCGPSGLWEALT

|          |       |                |        |                   |                                                                |
|----------|-------|----------------|--------|-------------------|----------------------------------------------------------------|
| 01:9606  | 51570 | 0#NP_001190996 | ANKS1B | Homo_sapiens      |                                                                |
| 01:9606  | 51570 | 0#NP_001190997 | ANKS1B | Homo_sapiens      |                                                                |
| 01:9606  | 51570 | 0#NP_001190998 | ANKS1B | Homo_sapiens      |                                                                |
| 01:9606  | 51570 | 0#NP_001190999 | ANKS1B | Homo_sapiens      |                                                                |
| 01:9606  | 51570 | 0#NP_001191008 | ANKS1B | Homo_sapiens      |                                                                |
| 01:9606  | 51570 | 0#NP_001191009 | ANKS1B | Homo_sapiens      |                                                                |
| 01:9606  | 51570 | 0#NP_001191010 | ANKS1B | Homo_sapiens      |                                                                |
| 01:9606  | 51570 | 0#NP_064525    | ANKS1B | Homo_sapiens      |                                                                |
| 01:9606  | 51570 | 0#NP_690001    | ANKS1B | Homo_sapiens      | PCNGCRNLGFPMLAQESYPKKRNYTMEIVPSASLDTFFPSENENFLCDLMDTAVTKKPCSL  |
| 01:9606  | 51570 | 0#NP_858056    | ANKS1B | Homo_sapiens      |                                                                |
| 01:9606  | 51570 | NM_001204065   | ANKS1B | Homo_sapiens      |                                                                |
| 01:9606  | 51570 | NM_001204066   | ANKS1B | Homo_sapiens      |                                                                |
| 01:9606  | 51570 | NM_001204067   | ANKS1B | Homo_sapiens      |                                                                |
| 01:9606  | 51570 | NM_001204068   | ANKS1B | Homo_sapiens      |                                                                |
| 01:9606  | 51570 | NM_001204069   | ANKS1B | Homo_sapiens      |                                                                |
| 01:9606  | 51570 | NM_001204070   | ANKS1B | Homo_sapiens      |                                                                |
| 01:9606  | 51570 | NM_001204079   | ANKS1B | Homo_sapiens      |                                                                |
| 01:9606  | 51570 | NM_001204080   | ANKS1B | Homo_sapiens      |                                                                |
| 01:9606  | 51570 | NM_001204081   | ANKS1B | Homo_sapiens      |                                                                |
| 01:9606  | 51570 | NM_020140      | ANKS1B | Homo_sapiens      |                                                                |
| 01:9606  | 51570 | NM_152788      | ANKS1B | Homo_sapiens      | PCNGCRNLGFPMLAQESYPKKRNYTMEIVPSASLDTFFPSENENFLCDLMDTAVTKKPCSL  |
| 01:9606  | 51570 | NM_181670      | ANKS1B | Homo_sapiens      |                                                                |
| 06:10116 | 51570 | NM_001271371   | Anks1b | Rattus_norvegicus | PCNGCRNLGFPMLAQESYPKKRNYTMEIVPSASLDTFFPSENENFLCELVDTAIVTKKPCSL |
| 07:10090 | 51570 | NM_001128086   | Anks1b | Mus_musculus      | PCNGCRNLGFPMLAQESYPKKRNFPMEPEPSASLDTFFPSENENFLCELVDTAIVTKKPCSL |
| 07:10090 | 51570 | NM_001177396   | Anks1b | Mus_musculus      |                                                                |
| 07:10090 | 51570 | NM_001177397   | Anks1b | Mus_musculus      |                                                                |
| 07:10090 | 51570 | NM_001177398   | Anks1b | Mus_musculus      |                                                                |
| 07:10090 | 51570 | NM_181398      | Anks1b | Mus_musculus      |                                                                |
| 08:9031  | 51570 | NM_001252062   | ANKS1B | Gallus_gallus     | PCNGCRNLGFSMLAQESYSKKRGYALEAIPSVPLDAVPSENDSSLCDLIDIAVTKKPCSL   |
| 08:9031  | 51570 | NM_001252062   | ANKS1B | Gallus_gallus     | PCNGCRNLGFSMLAQESYSKKRGYALEAIPSVPLDAVPSENDSSLCDLIDIAVTKKPCSL   |
| 10:7955  | 51570 | NM_001100017   | anks1b | Danio_rerio       | PCNGCRNLGFSQDKR-----CVEIAHSPSLDVFLPEDEDNPYESVATAVTRKPCSL       |

|          |               |                |        |                   |                                                              |
|----------|---------------|----------------|--------|-------------------|--------------------------------------------------------------|
| 00:1     | Ac-AGSFDSNFPR |                |        |                   |                                                              |
| 01:9606  | 51570         | 0#NP_001190994 | ANKS1B | Homo_sapiens      |                                                              |
| 01:9606  | 51570         | 0#NP_001190995 | ANKS1B | Homo_sapiens      |                                                              |
| 01:9606  | 51570         | 0#NP_001190996 | ANKS1B | Homo_sapiens      |                                                              |
| 01:9606  | 51570         | 0#NP_001190997 | ANKS1B | Homo_sapiens      |                                                              |
| 01:9606  | 51570         | 0#NP_001190998 | ANKS1B | Homo_sapiens      |                                                              |
| 01:9606  | 51570         | 0#NP_001190999 | ANKS1B | Homo_sapiens      |                                                              |
| 01:9606  | 51570         | 0#NP_001191008 | ANKS1B | Homo_sapiens      |                                                              |
| 01:9606  | 51570         | 0#NP_001191009 | ANKS1B | Homo_sapiens      |                                                              |
| 01:9606  | 51570         | 0#NP_001191010 | ANKS1B | Homo_sapiens      |                                                              |
| 01:9606  | 51570         | 0#NP_064525    | ANKS1B | Homo_sapiens      |                                                              |
| 01:9606  | 51570         | 0#NP_690001    | ANKS1B | Homo_sapiens      | EIARAP-SPRTDNASEVAVTTPGTSNHRNSSTGPTDCSPSPDPTALKNIVKVIRPQPKQ  |
| 01:9606  | 51570         | 0#NP_858056    | ANKS1B | Homo_sapiens      |                                                              |
| 01:9606  | 51570         | NM_001204065   | ANKS1B | Homo_sapiens      |                                                              |
| 01:9606  | 51570         | NM_001204066   | ANKS1B | Homo_sapiens      |                                                              |
| 01:9606  | 51570         | NM_001204067   | ANKS1B | Homo_sapiens      |                                                              |
| 01:9606  | 51570         | NM_001204068   | ANKS1B | Homo_sapiens      |                                                              |
| 01:9606  | 51570         | NM_001204069   | ANKS1B | Homo_sapiens      |                                                              |
| 01:9606  | 51570         | NM_001204070   | ANKS1B | Homo_sapiens      |                                                              |
| 01:9606  | 51570         | NM_001204079   | ANKS1B | Homo_sapiens      |                                                              |
| 01:9606  | 51570         | NM_001204080   | ANKS1B | Homo_sapiens      |                                                              |
| 01:9606  | 51570         | NM_001204081   | ANKS1B | Homo_sapiens      |                                                              |
| 01:9606  | 51570         | NM_020140      | ANKS1B | Homo_sapiens      |                                                              |
| 01:9606  | 51570         | NM_152788      | ANKS1B | Homo_sapiens      | EIARAP-SPRTDNASEVAVTTPGTSNHRNSSTGPTDCSPSPDPTALKNIVKVIRPQPKQ  |
| 01:9606  | 51570         | NM_181670      | ANKS1B | Homo_sapiens      |                                                              |
| 06:10116 | 51570         | NM_001271371   | Anks1b | Rattus_norvegicus | EIARAP-SPRTDNASEVAITAPGTGHHRNSSTGPTDCSPSPDPTALKNIVKVIRPQPKQ  |
| 07:10090 | 51570         | NM_001128086   | Anks1b | Mus_musculus      | EIARAP-SPRTDNASEVAITAPGTSHHRNSSTGPTDCSPSPDPTALKNIVKVIRPQPKQ  |
| 07:10090 | 51570         | NM_001177396   | Anks1b | Mus_musculus      |                                                              |
| 07:10090 | 51570         | NM_001177397   | Anks1b | Mus_musculus      |                                                              |
| 07:10090 | 51570         | NM_001177398   | Anks1b | Mus_musculus      |                                                              |
| 07:10090 | 51570         | NM_181398      | Anks1b | Mus_musculus      |                                                              |
| 08:9031  | 51570         | NM_001252062   | ANKS1B | Gallus_gallus     | EIARVS-SSRPDNAPQVAITAPGSGSHRNSSTGPTDCSPSPDPTALKNIVKVIRPQPKQ  |
| 08:9031  | 51570         | NM_001252062   | ANKS1B | Gallus_gallus     | EIARVS-SSRPDNAPQVAITAPGSGSHRNSSTGPTDCSPSPDPTALKNIVKVIRPQPKQ  |
| 10:7955  | 51570         | NM_001100017   | anks1b | Danio_rerio       | DINLHNACPRNGHFHSVSVSDAERGNHGDDSTGLTPDCSPSPDPTALRNIERVIRPQPKQ |

|         |               |                |        |              |                                                              |
|---------|---------------|----------------|--------|--------------|--------------------------------------------------------------|
| 00:1    | Ac-AGSFDSNFPR |                |        |              |                                                              |
| 01:9606 | 51570         | 0#NP_001190994 | ANKS1B | Homo_sapiens |                                                              |
| 01:9606 | 51570         | 0#NP_001190995 | ANKS1B | Homo_sapiens |                                                              |
| 01:9606 | 51570         | 0#NP_001190996 | ANKS1B | Homo_sapiens |                                                              |
| 01:9606 | 51570         | 0#NP_001190997 | ANKS1B | Homo_sapiens |                                                              |
| 01:9606 | 51570         | 0#NP_001190998 | ANKS1B | Homo_sapiens |                                                              |
| 01:9606 | 51570         | 0#NP_001190999 | ANKS1B | Homo_sapiens |                                                              |
| 01:9606 | 51570         | 0#NP_001191008 | ANKS1B | Homo_sapiens |                                                              |
| 01:9606 | 51570         | 0#NP_001191009 | ANKS1B | Homo_sapiens |                                                              |
| 01:9606 | 51570         | 0#NP_001191010 | ANKS1B | Homo_sapiens |                                                              |
| 01:9606 | 51570         | 0#NP_064525    | ANKS1B | Homo_sapiens |                                                              |
| 01:9606 | 51570         | 0#NP_690001    | ANKS1B | Homo_sapiens | RTSIVSSLDfHRM--NHNQEYFEINTSTGCTSFITASPPA---SPPTSSVGTTEVKNEGT |
| 01:9606 | 51570         | 0#NP_858056    | ANKS1B | Homo_sapiens |                                                              |
| 01:9606 | 51570         | NM_001204065   | ANKS1B | Homo_sapiens |                                                              |
| 01:9606 | 51570         | NM_001204066   | ANKS1B | Homo_sapiens |                                                              |
| 01:9606 | 51570         | NM_001204067   | ANKS1B | Homo_sapiens |                                                              |
| 01:9606 | 51570         | NM_001204068   | ANKS1B | Homo_sapiens |                                                              |

|          |       |              |        |                   |                                                                |
|----------|-------|--------------|--------|-------------------|----------------------------------------------------------------|
| 01:9606  | 51570 | NM_001204069 | ANKS1B | Homo_sapiens      | -----                                                          |
| 01:9606  | 51570 | NM_001204070 | ANKS1B | Homo_sapiens      | -----                                                          |
| 01:9606  | 51570 | NM_001204079 | ANKS1B | Homo_sapiens      | -----                                                          |
| 01:9606  | 51570 | NM_001204080 | ANKS1B | Homo_sapiens      | -----                                                          |
| 01:9606  | 51570 | NM_001204081 | ANKS1B | Homo_sapiens      | -----                                                          |
| 01:9606  | 51570 | NM_020140    | ANKS1B | Homo_sapiens      | -----                                                          |
| 01:9606  | 51570 | NM_152788    | ANKS1B | Homo_sapiens      | RTSIVSSSLDFHRM--NHNQEYFEINTSTGCTSFITASPPA----SPPTSSVGTTEVKNEGT |
| 01:9606  | 51570 | NM_181670    | ANKS1B | Homo_sapiens      | -----                                                          |
| 06:10116 | 51570 | NM_001271371 | Anks1b | Rattus_norvegicus | RTSIVSSSLDFQRM--NHNQEYFEISTSTGCTSFSTSSPPV----SPPTSSVETTEIKNEGA |
| 07:10090 | 51570 | NM_001128086 | Anks1b | Mus_musculus      | RTSIVSSSLDFQRM--NHNQEYFEISTSTGCTSFSTSSPAA----SPPTSSVETTEVKNEGA |
| 07:10090 | 51570 | NM_001177396 | Anks1b | Mus_musculus      | -----                                                          |
| 07:10090 | 51570 | NM_001177397 | Anks1b | Mus_musculus      | -----                                                          |
| 07:10090 | 51570 | NM_001177398 | Anks1b | Mus_musculus      | -----                                                          |
| 07:10090 | 51570 | NM_181398    | Anks1b | Mus_musculus      | -----                                                          |
| 08:9031  | 51570 | NM_001252062 | ANKS1B | Gallus_gallus     | RTSIVSSSLEFHRT--NHSHDYFEINSSIASPSFIXTPAI----SPANYSFGSLEDKNLGT  |
| 08:9031  | 51570 | NM_001252062 | ANKS1B | Gallus_gallus     | RTSIVSSSLEFHRT--NHSHDYFEINSSIASPSFISTPAI----SPANYSFGSLEDKNLGT  |
| 10:7955  | 51570 | NM_001100017 | anks1b | Danio_rerio       | RTSLSSSQDVQKPLQNHSGDPSEVSSSLGYASFSTSPASPPISPANCSGTGSAEDYALTD   |

|          |               |                |        |                   |                                                               |
|----------|---------------|----------------|--------|-------------------|---------------------------------------------------------------|
| 00:1     | Ac-AGSFDSNFPR |                |        |                   | -----                                                         |
| 01:9606  | 51570         | 0#NP_001190994 | ANKS1B | Homo_sapiens      | -----                                                         |
| 01:9606  | 51570         | 0#NP_001190995 | ANKS1B | Homo_sapiens      | -----                                                         |
| 01:9606  | 51570         | 0#NP_001190996 | ANKS1B | Homo_sapiens      | -----                                                         |
| 01:9606  | 51570         | 0#NP_001190997 | ANKS1B | Homo_sapiens      | -----                                                         |
| 01:9606  | 51570         | 0#NP_001190998 | ANKS1B | Homo_sapiens      | -----                                                         |
| 01:9606  | 51570         | 0#NP_001190999 | ANKS1B | Homo_sapiens      | -----                                                         |
| 01:9606  | 51570         | 0#NP_001191008 | ANKS1B | Homo_sapiens      | -----                                                         |
| 01:9606  | 51570         | 0#NP_001191009 | ANKS1B | Homo_sapiens      | -----                                                         |
| 01:9606  | 51570         | 0#NP_001191010 | ANKS1B | Homo_sapiens      | -----                                                         |
| 01:9606  | 51570         | 0#NP_064525    | ANKS1B | Homo_sapiens      | -----                                                         |
| 01:9606  | 51570         | 0#NP_690001    | ANKS1B | Homo_sapiens      | NHTDDLRSQDDNDPPKEYDPGQFAGLLHGSSPACESPENPFHLYGKREQCEKGQDEV---- |
| 01:9606  | 51570         | 0#NP_858056    | ANKS1B | Homo_sapiens      | -----                                                         |
| 01:9606  | 51570         | NM_001204065   | ANKS1B | Homo_sapiens      | -----                                                         |
| 01:9606  | 51570         | NM_001204066   | ANKS1B | Homo_sapiens      | -----                                                         |
| 01:9606  | 51570         | NM_001204067   | ANKS1B | Homo_sapiens      | -----                                                         |
| 01:9606  | 51570         | NM_001204068   | ANKS1B | Homo_sapiens      | -----                                                         |
| 01:9606  | 51570         | NM_001204069   | ANKS1B | Homo_sapiens      | -----                                                         |
| 01:9606  | 51570         | NM_001204070   | ANKS1B | Homo_sapiens      | -----                                                         |
| 01:9606  | 51570         | NM_001204079   | ANKS1B | Homo_sapiens      | -----                                                         |
| 01:9606  | 51570         | NM_001204080   | ANKS1B | Homo_sapiens      | -----                                                         |
| 01:9606  | 51570         | NM_001204081   | ANKS1B | Homo_sapiens      | -----                                                         |
| 01:9606  | 51570         | NM_020140      | ANKS1B | Homo_sapiens      | -----                                                         |
| 01:9606  | 51570         | NM_152788      | ANKS1B | Homo_sapiens      | NHTDDLRSQDDNDPPKEYDPGQFAGLLHGSSPACESPENPFHLYGKREQCEKGQDEV---- |
| 01:9606  | 51570         | NM_181670      | ANKS1B | Homo_sapiens      | -----                                                         |
| 06:10116 | 51570         | NM_001271371   | Anks1b | Rattus_norvegicus | EHTDDLRSQEDDEPPKEYDAGQFAGLLHGSSPACEAPENPFHLYGKRNGEDGQEEA---   |
| 07:10090 | 51570         | NM_001128086   | Anks1b | Mus_musculus      | EHADDLSQQEDDEPPKEYDAGQFAGLLHGSSPACESPENPFHLYGKRNTCEDGPDEA---  |
| 07:10090 | 51570         | NM_001177396   | Anks1b | Mus_musculus      | -----                                                         |
| 07:10090 | 51570         | NM_001177397   | Anks1b | Mus_musculus      | -----                                                         |
| 07:10090 | 51570         | NM_001177398   | Anks1b | Mus_musculus      | -----                                                         |
| 07:10090 | 51570         | NM_181398      | Anks1b | Mus_musculus      | -----                                                         |
| 08:9031  | 51570         | NM_001252062   | ANKS1B | Gallus_gallus     | EHTVSPSRQNSNDGPPEMDVGQFAGLLHGSSPACDPPDNPLQLYSKRNQCTSPLDKS---  |
| 08:9031  | 51570         | NM_001252062   | ANKS1B | Gallus_gallus     | EHTVSPSRQNSNDGPPEMDVGQFAGLLHGSSPACDPPDNPLQLYSKRNQCTSPLDKS---  |
| 10:7955  | 51570         | NM_001100017   | anks1b | Danio_rerio       | EATYQKECIERDDRRNSHVPEQFAGLLHGSSPACESPDNPYQLYGKVRKFSVPEPPLRHG  |

|          |               |                |        |                   |                                                               |
|----------|---------------|----------------|--------|-------------------|---------------------------------------------------------------|
| 00:1     | Ac-AGSFDSNFPR |                |        |                   | -----                                                         |
| 01:9606  | 51570         | 0#NP_001190994 | ANKS1B | Homo_sapiens      | -----                                                         |
| 01:9606  | 51570         | 0#NP_001190995 | ANKS1B | Homo_sapiens      | -----                                                         |
| 01:9606  | 51570         | 0#NP_001190996 | ANKS1B | Homo_sapiens      | -----                                                         |
| 01:9606  | 51570         | 0#NP_001190997 | ANKS1B | Homo_sapiens      | -----                                                         |
| 01:9606  | 51570         | 0#NP_001190998 | ANKS1B | Homo_sapiens      | -----                                                         |
| 01:9606  | 51570         | 0#NP_001190999 | ANKS1B | Homo_sapiens      | -----                                                         |
| 01:9606  | 51570         | 0#NP_001191008 | ANKS1B | Homo_sapiens      | -----                                                         |
| 01:9606  | 51570         | 0#NP_001191009 | ANKS1B | Homo_sapiens      | -----                                                         |
| 01:9606  | 51570         | 0#NP_001191010 | ANKS1B | Homo_sapiens      | -----                                                         |
| 01:9606  | 51570         | 0#NP_064525    | ANKS1B | Homo_sapiens      | -----                                                         |
| 01:9606  | 51570         | 0#NP_690001    | ANKS1B | Homo_sapiens      | SLANSP---LPFKQSPIENNSEPLVKKIKPKVVSRTIFHKKSNOLENH--TI----VGTR  |
| 01:9606  | 51570         | 0#NP_858056    | ANKS1B | Homo_sapiens      | -----                                                         |
| 01:9606  | 51570         | NM_001204065   | ANKS1B | Homo_sapiens      | -----                                                         |
| 01:9606  | 51570         | NM_001204066   | ANKS1B | Homo_sapiens      | -----                                                         |
| 01:9606  | 51570         | NM_001204067   | ANKS1B | Homo_sapiens      | -----                                                         |
| 01:9606  | 51570         | NM_001204068   | ANKS1B | Homo_sapiens      | -----                                                         |
| 01:9606  | 51570         | NM_001204069   | ANKS1B | Homo_sapiens      | -----                                                         |
| 01:9606  | 51570         | NM_001204070   | ANKS1B | Homo_sapiens      | -----                                                         |
| 01:9606  | 51570         | NM_001204079   | ANKS1B | Homo_sapiens      | -----                                                         |
| 01:9606  | 51570         | NM_001204080   | ANKS1B | Homo_sapiens      | -----                                                         |
| 01:9606  | 51570         | NM_001204081   | ANKS1B | Homo_sapiens      | -----                                                         |
| 01:9606  | 51570         | NM_020140      | ANKS1B | Homo_sapiens      | -----                                                         |
| 01:9606  | 51570         | NM_152788      | ANKS1B | Homo_sapiens      | SLANSP---LPFKQSPIENNSEPLVKKIKPKVVSRTIFHKKSNOLENH--TI----VGTR  |
| 01:9606  | 51570         | NM_181670      | ANKS1B | Homo_sapiens      | -----                                                         |
| 06:10116 | 51570         | NM_001271371   | Anks1b | Rattus_norvegicus | SLANSP---LPFKQPTPIENNPEPSVKKIKPKVVSRTIFHKRSHQLENH--TI----VGTR |
| 07:10090 | 51570         | NM_001128086   | Anks1b | Mus_musculus      | SLANSP---LPFKQPTPIENNPEPSVKKVKPKVVSRTIFHKRSHQLENH--TI----VGTR |
| 07:10090 | 51570         | NM_001177396   | Anks1b | Mus_musculus      | -----                                                         |
| 07:10090 | 51570         | NM_001177397   | Anks1b | Mus_musculus      | -----                                                         |
| 07:10090 | 51570         | NM_001177398   | Anks1b | Mus_musculus      | -----                                                         |
| 07:10090 | 51570         | NM_181398      | Anks1b | Mus_musculus      | -----                                                         |

ILSKST---MQQMLRKESNTDPPVKKKKPPVNRITFHSKTKPVENH--TL---VGTS  
ILSKST---MQQMLRKESNTDPPVKKKKPPVNRITFHSKTKPVENH--TL---VGTS  
NFLRAPEYSPFPRTGSEASALKTOREVKPQVYVRTIFHTRVNOGPVTFGEQVDKTTGVH

-----

-----AGSFDSNFPR-----

```

-----MMWQCHLSAQDYRYYPVD-GY
-----MMWQCHLSAQDYRYYPVD-GY
-----MMWQCHLSAQDYRYYPVD-GY

-----MMWQCHLSAQDYRYYPVD-GY
SNEKTSRVNWSSESST--AEHSSKGNsertPSFTSE----WEE----IDKIMSSIDVGI
-----MMWQCHLSAQDYRYYPVD-GY

-----
-----SVKLAGSFDSNfPRGMMWQCHLSAQDYRYYPVD-GY
-----SVKLAGSFDSNfPRGMMWQCHLSAQDYRYYPVD-GY
-----SVKLAGSFDSNfPRGMMWQCHLSAQDYRYYPVD-GY

-----VGGARAGP

-----SVKLAGSFDSNfPRGMMWQCHLSAQDYRYYPVD-GY
SNEKTSRVNWSSESST--AEHSSKGNsertPSFTSE----WEE----IDKIMSSIDVGI
-----SVKLAGSFDSNfPRGMMWQCHLSAQDYRYYPVD-GY
SK-DKARVNWSKSST--AERSSKDNsertPSFTSE----WEE----IDKIMNSIDVGI
SK-DKARVNWSKSST--AERSSKDNsertPSFTSE----WEE----IDKIMNSIDVGI
-----SVKLAGSFDNNfPRSMMWQCHPSAPDYRYYPVD-GY

-----SVKLAGSFDNNfPRSMMWQCHPSAPDYRYYPVD-GY
-----SVKLAGSFDNNfPRSMMWQCHPSAPDYRYYPVD-GY
TSGKKARSNWSEPTP--SQQCSKGNsertPSFTSE----WEE----IDKIMSSIDAGI
TSGKKARSNWSEPTP--SQQCSKGNsertPSFTSE----WEE----IDKIMSSIDAGI
PIEE---EQWGSRGQSSPGKSSPSRLERTPSFTAEE---WEE----IDKIMSSIDAGI

```

-----

-----MANGFDNVQFMGSNVME  
-----MGPRCPVQTVGQ-----WLESIGLPQYENHL-----MANGFDNVQFMGSNVME  
SLLKRFLPHLPTGPRCPVQTVGQ-----WLESIGLPQYENHL-----MANGFDNVQFMGSNVME  
SLLKRFLPHLPTGPRCPVQTVGQ-----WLESIGLPQYENHL-----MANGFDNVQFMGSNVME  
SLLKRFLPHLPTGPRCPVQTVGQ-----WLESIGLPQYENHL-----MANGFDNVQFMGSNVME  
-----







|          |       |              |        |                   |
|----------|-------|--------------|--------|-------------------|
| 01:9606  | 51570 | NM_001204067 | ANKS1B | Homo_sapiens      |
| 01:9606  | 51570 | NM_001204068 | ANKS1B | Homo_sapiens      |
| 01:9606  | 51570 | NM_001204069 | ANKS1B | Homo_sapiens      |
| 01:9606  | 51570 | NM_001204070 | ANKS1B | Homo_sapiens      |
| 01:9606  | 51570 | NM_001204079 | ANKS1B | Homo_sapiens      |
| 01:9606  | 51570 | NM_001204080 | ANKS1B | Homo_sapiens      |
| 01:9606  | 51570 | NM_001204081 | ANKS1B | Homo_sapiens      |
| 01:9606  | 51570 | NM_020140    | ANKS1B | Homo_sapiens      |
| 01:9606  | 51570 | NM_152788    | ANKS1B | Homo_sapiens      |
| 01:9606  | 51570 | NM_181670    | ANKS1B | Homo_sapiens      |
| 06:10116 | 51570 | NM_001271371 | Anks1b | Rattus_norvegicus |
| 07:10090 | 51570 | NM_001128086 | Anks1b | Mus_musculus      |
| 07:10090 | 51570 | NM_001177396 | Anks1b | Mus_musculus      |
| 07:10090 | 51570 | NM_001177397 | Anks1b | Mus_musculus      |
| 07:10090 | 51570 | NM_001177398 | Anks1b | Mus_musculus      |
| 07:10090 | 51570 | NM_181398    | Anks1b | Mus_musculus      |
| 08:9031  | 51570 | NM_001252062 | ANKS1B | Gallus_gallus     |
| 08:9031  | 51570 | NM_001252062 | ANKS1B | Gallus_gallus     |
| 10:7955  | 51570 | NM_001100017 | anks1b | Danio_rerio       |

|          |               |                |        |                   |
|----------|---------------|----------------|--------|-------------------|
| 00:1     | Ac-AGSFDSNFPR |                |        |                   |
| 01:9606  | 51570         | 0#NP_001190994 | ANKS1B | Homo_sapiens      |
| 01:9606  | 51570         | 0#NP_001190995 | ANKS1B | Homo_sapiens      |
| 01:9606  | 51570         | 0#NP_001190996 | ANKS1B | Homo_sapiens      |
| 01:9606  | 51570         | 0#NP_001190997 | ANKS1B | Homo_sapiens      |
| 01:9606  | 51570         | 0#NP_001190998 | ANKS1B | Homo_sapiens      |
| 01:9606  | 51570         | 0#NP_001190999 | ANKS1B | Homo_sapiens      |
| 01:9606  | 51570         | 0#NP_001191008 | ANKS1B | Homo_sapiens      |
| 01:9606  | 51570         | 0#NP_001191009 | ANKS1B | Homo_sapiens      |
| 01:9606  | 51570         | 0#NP_001191010 | ANKS1B | Homo_sapiens      |
| 01:9606  | 51570         | 0#NP_064525    | ANKS1B | Homo_sapiens      |
| 01:9606  | 51570         | 0#NP_690001    | ANKS1B | Homo_sapiens      |
| 01:9606  | 51570         | 0#NP_858056    | ANKS1B | Homo_sapiens      |
| 01:9606  | 51570         | NM_001204065   | ANKS1B | Homo_sapiens      |
| 01:9606  | 51570         | NM_001204066   | ANKS1B | Homo_sapiens      |
| 01:9606  | 51570         | NM_001204067   | ANKS1B | Homo_sapiens      |
| 01:9606  | 51570         | NM_001204068   | ANKS1B | Homo_sapiens      |
| 01:9606  | 51570         | NM_001204069   | ANKS1B | Homo_sapiens      |
| 01:9606  | 51570         | NM_001204070   | ANKS1B | Homo_sapiens      |
| 01:9606  | 51570         | NM_001204079   | ANKS1B | Homo_sapiens      |
| 01:9606  | 51570         | NM_001204080   | ANKS1B | Homo_sapiens      |
| 01:9606  | 51570         | NM_001204081   | ANKS1B | Homo_sapiens      |
| 01:9606  | 51570         | NM_020140      | ANKS1B | Homo_sapiens      |
| 01:9606  | 51570         | NM_152788      | ANKS1B | Homo_sapiens      |
| 01:9606  | 51570         | NM_181670      | ANKS1B | Homo_sapiens      |
| 06:10116 | 51570         | NM_001271371   | Anks1b | Rattus_norvegicus |
| 07:10090 | 51570         | NM_001128086   | Anks1b | Mus_musculus      |
| 07:10090 | 51570         | NM_001177396   | Anks1b | Mus_musculus      |
| 07:10090 | 51570         | NM_001177397   | Anks1b | Mus_musculus      |
| 07:10090 | 51570         | NM_001177398   | Anks1b | Mus_musculus      |
| 07:10090 | 51570         | NM_181398      | Anks1b | Mus_musculus      |
| 08:9031  | 51570         | NM_001252062   | ANKS1B | Gallus_gallus     |
| 08:9031  | 51570         | NM_001252062   | ANKS1B | Gallus_gallus     |
| 10:7955  | 51570         | NM_001100017   | anks1b | Danio_rerio       |

EVAYQLALQARKGGHS-STLPESFENKPSKPIPKPRVSIRKSV-IDPS--EQKTLANLPW  
EVAYQLALQARKGGHS-STLPESFENKPSKPIPKPRVSIRKSVPFCK--ADRPI-----  
EVAYQLALQARKGGHS-STLPESFENKPSKPIPKPRVSIRKSVQIDPS--EQKTLANLPW  
EVAYQLALQARKGGHS-STLPESFENKPSKPIPKPRVSIRKSVQIDPS--EQKTLANLPW  
EVAYQLALQARKGGHS-STLPESFENKPSKPIPKPRVSIRKSV-IDPS--EQKTLANLPW  
EVAYQLALQARKGGHS-STLPESFENKPSKPIPKPRVSIRKSVQIDPS--EQKTLANLPW  
EVAYQLALQARKGGHS-STLPESFENKPSKPIPKPRVSIRKSVDLLHASHTGQ-----  
EVAYQLALQARKGGHS-STLPESFENKPSKPIPKPRVSIRKSVDLLHA--SHTGQ-----  
EVAYQLALQARKGGHS-STLPESFENKPSKPIPKPRVSIRKSVDLLHASHTGQ-----  
EVAYQLALQARKGGHS-STLPESFENKPSKPIPKPRVSIRKSVQIDPS--EQKTLANLPW  
EVAYQLALQARKGGHS-STLPESFENKPSKPIPKPRVSIRKSVQIDPS--EQKTLANLPW  
EVAYQLALQARKGGHS-STLPESFENKPSKPIPKPRVSIRKSVQIDPS--EQKTLANLPW  
EVAYQLALQARKGGHS-STLPESFENKPSKPIPKPRVSIRKSVQIDPS--EQKTLANLPW  
EVAYQLALQARKGGHS-STLPESFENKPSKPIPKPRVSIRKSVQIDPS--EQKTLANLPW  
EVAYQLALQARKGGHS-STLPESFENKPSKPIPKPRVSIRKSVQIDPS--EQKTLANLPW  
EVAYQLALQARKGGHS-STLPESFENKPSKPIPKPRVSIRKSVQIDPS--EQKTLANLPW  
EVAYQLALQARKGGHS-STLPESFENKPSKPIPKPRVSIRKSVQIDP--SEQKTLANLPW  
EVAYQLALQARKSGHGSSTLPESFDSKPSKPVPKPRGNIRKSMEQP--SMDQKGHANVPW

-----  
IVEPGQEAARGINTKYETTIF-----  
IVEPGQEAARGINTKYETTIF-----  
IVEPGQEAARGINTKYETTIF-----  
-----  
IVEPGQEAARGINTKYETTIF-----  
IVEPGQEAARGINTKYETTIF-----  
IVEPGQEAARGINTKYETTIF-----  
IVEPGQEAARGINTKYETTIF-----  
IVEPGQEAARGINTKYETTIF-----  
--EPSERHTEALRKF-----  
--EPSERHTEALRKF-----  
--EPSERHTEALRKF-----  
IVEPGQEAARGINTKYETTIF-----  
IVEPGQEAARGINTKYETTIF-----  
IVEPGQEAARGINTKYETTIF-----  
IVEPGQEAARGINTKYETTIF-----  
IVEPGQEAARGINTKYETTIF-----  
IVEPGQEAARGINTKYETTIF-----  
--EPSERHTEALRKF-----  
--EPSERHTEALRKF-----  
--EPSERHTEALRKF-----  
IVEPGQEAARGINTKYETTIF-----  
IVEPGQEAARGINTKYETTIF-----  
IVEPGQEAARGINTKYETTIF-----  
IVEPGQEAARGINTKYETTIF-----  
IVEPGQEAARGINTKYETTIF-----  
--EPSERHTEALRKF-----  
--EPSERHTEALRKF-----  
IVEPGQEAARGINTKYETTIF-----  
IVEPGQEAARGINTKYETTIF-----  
IVEPGQEAARGINTKYETTIF-----  
IVEPGQEAARGINTKYETTIF-----  
IC-----  
IVEPGQEAARGINTKYETTIF-----  
IVEPGQEAARGANTKAMADAHVYYSIGIORM

*TNPO1*

Ac-SGPGQEAVPLRPKAR

CLUSTAL O(1.2.1) multiple sequence alignment

|                                                       |                                                              |
|-------------------------------------------------------|--------------------------------------------------------------|
| 00:1 Ac-SGPGQEA VPLRPKAR                              | -----SGPGQEA VPLRPKAR-----                                   |
| 01:9606 5358 0#NP_002261 TNPO1 Homo_sapiens           | -----MVW----DRQTKMEYEWKPD                                    |
| 01:9606 5358 0#NP_694858 TNPO1 Homo_sapiens           | -----MEYEWKPD                                                |
| 01:9606 5358 NM_002270 TNPO1 Homo_sapiens             | -----SPDSLCSAAISGPGQEA VPLRPKARAPASGMVW----DRQTKMEYEWKPD     |
| 01:9606 5358 NM_153188 TNPO1 Homo_sapiens             | -----LPSGHL----RQQTKMEYEWKPD                                 |
| 04:9913 5358 NM_001076540 TNPO1 Bos_taurus            | -----ALCSAAISGPGREAAPLRQRARAPASGMVW----DRQTKMEYEWKPD         |
| 06:10116 5358 NM_001100692 Tnpol Rattus_norvegicus    | -----LQQTCKMEYEWKPD                                          |
| 07:10090 5358 NM_001048267 Tnpol Mus_musculus         | -KFAVTQSGQLLAL--EAAAEHSTDTADVADLWSGPAGFRVR--ASQTKMEYEWKPD    |
| 07:10090 5358 NM_178716 Tnpol Mus_musculus            | -PIGPALAGARILFVPQFPQAPDGRQRRFGRKARAPASGMVW----DRQTKMEYEWKPD  |
| 12:7227 5358 NM_001274543 Trn Drosophila_melanogaster | -----AYSLSLARSHCI----HLAN-----CAKKSMTWEPQ                    |
| 12:7227 5358 NM_058020 Trn Drosophila_melanogaster    | -----STA-----NTQSSKMTWEPQ                                    |
| 12:7227 5358 NM_168160 Trn Drosophila_melanogaster    | -----ST-----ANTQSKMTWEPQ                                     |
| 12:7227 5358 NM_168161 Trn Drosophila_melanogaster    | -----VVGKRS---HVTLGAGLSTPAFRRKTI--KCQGNI-----ERKTSKMTWEPQ    |
| 13:6239 5358 NM_064586 imb-2 Caenorhabditis_elegans   | -----MAFQPD                                                  |
| 13:6239 5358 NM_064587 imb-2 Caenorhabditis_elegans   | -----                                                        |
| 15:3702 5358 NM_001036282 TRN1 Arabidopsis_thaliana   | -----TFLLCVFFCPKNHI-----LLPSHTSHIYLFATTIMAATAVVWQPR          |
| 15:3702 5358 NM_124936 TRN1 Arabidopsis_thaliana      | MESEPDQSFKDLWSFLQAIKDPQQTFF--FNLQTL-----SF--S                |
| 15:3702 5358 NM_127248 TRN1 Arabidopsis_thaliana      | -----TFLLCVFFCPKNHI-----LLPSHTSHIYLFATTIMAATAVVWQPR          |
| 00:1 Ac-SGPGQEA VPLRPKAR                              | -----                                                        |
| 01:9606 5358 0#NP_002261 TNPO1 Homo_sapiens           | EQGLQQIILQLLKESQSPDTTIQR-TVQQKLEQLNQYPDFNNYLI FVLTKLKSE----- |
| 01:9606 5358 0#NP_694858 TNPO1 Homo_sapiens           | EQGLQQIILQLLKESQSPDTTIQR-TVQQKLEQLNQYPDFNNYLI FVLTKLKSE----- |
| 01:9606 5358 NM_002270 TNPO1 Homo_sapiens             | EQGLQQIILQLLKESQSPDTTIQR-TVQQKLEQLNQYPDFNNYLI FVLTKLKSE----- |
| 01:9606 5358 NM_153188 TNPO1 Homo_sapiens             | EQGLQQIILQLLKESQSPDTTIQR-TVQQKLEQLNQYPDFNNYLI FVLTKLKSE----- |
| 04:9913 5358 NM_001076540 TNPO1 Bos_taurus            | EQGLQQIILQLLKESQSPDTTIQR-TVQQKLEQLNQYPDFNNYLI FVLTKLKSE----- |
| 06:10116 5358 NM_001100692 Tnpol Rattus_norvegicus    | EQGLQQIILQLLKESQSPDTTIQR-TVQQKLEQLNQYPDFNNYLI FVLTKLKSE----- |
| 07:10090 5358 NM_001048267 Tnpol Mus_musculus         | EQGLQQIILQLLKESQSPDTTIQR-TVQQKLEQLNQYPDFNNYLI FVLTKLKSE----- |
| 07:10090 5358 NM_178716 Tnpol Mus_musculus            | EQGLQQIILQLLKESQSPDTTIQR-TVQQKLEQLNQYPDFNNYLI FVLTKLKSE----- |
| 12:7227 5358 NM_001274543 Trn Drosophila_melanogaster | GEGLQQIIAILKESQSPDTATQM-AVQMKLEEFNRYPDFNNYLIYVLTCLKTE-----   |
| 12:7227 5358 NM_058020 Trn Drosophila_melanogaster    | GEGLQQIIAILKESQSPDTATQM-AVQMKLEEFNRYPDFNNYLIYVLTCLKTE-----   |
| 12:7227 5358 NM_168160 Trn Drosophila_melanogaster    | GEGLQQIIAILKESQSPDTATQM-AVQMKLEEFNRYPDFNNYLIYVLTCLKTE-----   |
| 12:7227 5358 NM_168161 Trn Drosophila_melanogaster    | GEGLQQIIAILKESQSPDTATQM-AVQMKLEEFNRYPDFNNYLIYVLTCLKTE-----   |
| 13:6239 5358 NM_064586 imb-2 Caenorhabditis_elegans   | QHELEQVIQLLQHAHSTDRDVQR-NVQVQLVQLNEHQKFCCYLVYILSDMKEM-----   |
| 13:6239 5358 NM_064587 imb-2 Caenorhabditis_elegans   | -----                                                        |
| 15:3702 5358 NM_001036282 TRN1 Arabidopsis_thaliana   | DDGLAEICSLLEQQISPSSVVDKSQIWKQLQHSQFPDFNNYLVFILVRAEGK--       |
| 15:3702 5358 NM_124936 TRN1 Arabidopsis_thaliana      | SSGNTTHEQLITESMNI--NVTRDN---LTS-----LSQIFIELATSLTQTSRLNLE    |
| 15:3702 5358 NM_127248 TRN1 Arabidopsis_thaliana      | DDGLAEICSLLEQQISPSSVVDKSQIWKQLQHSQFPDFNNYLVFILVRAEGK-----    |
| 00:1 Ac-SGPGQEA VPLRPKAR                              | -----                                                        |
| 01:9606 5358 0#NP_002261 TNPO1 Homo_sapiens           | -----DEPTRSLSGLILKNNVKAHFQNFPGVTDFIKSECLNNIGDSSPLI-----      |
| 01:9606 5358 0#NP_694858 TNPO1 Homo_sapiens           | -----DEPTRSLSGLILKNNVKAHFQNFPGVTDFIKSECLNNIGDSSPLI-----      |
| 01:9606 5358 NM_002270 TNPO1 Homo_sapiens             | -----DEPTRSLSGLILKNNVKAHFQNFPGVTDFIKSECLNNIGDSSPLI-----      |
| 01:9606 5358 NM_153188 TNPO1 Homo_sapiens             | -----DEPTRSLSGLILKNNVKAHFQNFPGVTDFIKSECLNNIGDSSPLI-----      |
| 04:9913 5358 NM_001076540 TNPO1 Bos_taurus            | -----DEPTRSLSGLILKNNVKAHFQNFPGVTDFIKSECLNNIGDSSPLI-----      |
| 06:10116 5358 NM_001100692 Tnpol Rattus_norvegicus    | -----DEPTRSLSGLILKNNVKAHFQNFPGVTDFIKSECLNNIGDSSPLI-----      |
| 07:10090 5358 NM_001048267 Tnpol Mus_musculus         | -----DEPTRSLSGLILKNNVKAHFQNFPGVTDFIKSECLNNIGDSSPLI-----      |
| 07:10090 5358 NM_178716 Tnpol Mus_musculus            | -----DEPTRSLSGLILKNNVKAHFQNFPGVTDFIKSECLNNIGDSSPLI-----      |
| 12:7227 5358 NM_001274543 Trn Drosophila_melanogaster | -----DEPTRSLSGLILKNNIRMHGTTLQPEIIVEYIKHECLQAVGDASPLI-----    |
| 12:7227 5358 NM_058020 Trn Drosophila_melanogaster    | -----DEPTRSLSGLILKNNIRMHGTTLQPEIIVEYIKHECLQAVGDASPLI-----    |
| 12:7227 5358 NM_168160 Trn Drosophila_melanogaster    | -----DEPTRSLSGLILKNNIRMHGTTLQPEIIVEYIKHECLQAVGDASPLI-----    |
| 12:7227 5358 NM_168161 Trn Drosophila_melanogaster    | -----DEPTRSLSGLILKNNIRMHGTTLQPEIIVEYIKHECLQAVGDASPLI-----    |
| 13:6239 5358 NM_064586 imb-2 Caenorhabditis_elegans   | -----IDATSRSLAGLLLNIRAKWNKYPQDVKFFVRTTCLKSIGDQEPLI-----      |
| 13:6239 5358 NM_064587 imb-2 Caenorhabditis_elegans   | -----                                                        |
| 15:3702 5358 NM_001036282 TRN1 Arabidopsis_thaliana   | -----SVEVRQAAGLLLNLRGAYPSMTQENQYIKSELLPCLGAADRNI-----        |
| 15:3702 5358 NM_124936 TRN1 Arabidopsis_thaliana      | FEGIFWEIELLQSLGLLLDNTSKIKQLAFRKN--RFSEQCLNELSEILKRNRFLEKVMF  |
| 15:3702 5358 NM_127248 TRN1 Arabidopsis_thaliana      | -----SVEVRQAAGLLLNLRGAYPSMTQENQYIKSELLPCLGAADRNI-----        |
| 00:1 Ac-SGPGQEA VPLRPKAR                              | -----                                                        |
| 01:9606 5358 0#NP_002261 TNPO1 Homo_sapiens           | -----RATVGILITTIASKGELQNWPDLLPKLCSLLDSEDYNTCEGAFGALQKICE     |
| 01:9606 5358 0#NP_694858 TNPO1 Homo_sapiens           | -----RATVGILITTIASKGELQNWPDLLPKLCSLLDSEDYNTCEGAFGALQKICE     |
| 01:9606 5358 NM_002270 TNPO1 Homo_sapiens             | -----RATVGILITTIASKGELQNWPDLLPKLCSLLDSEDYNTCEGAFGALQKICE     |
| 01:9606 5358 NM_153188 TNPO1 Homo_sapiens             | -----RATVGILITTIASKGELQNWPDLLPKLCSLLDSEDYNTCEGAFGALQKICE     |
| 04:9913 5358 NM_001076540 TNPO1 Bos_taurus            | -----RATVGILITTIASKGELQNWPDLLPKLCSLLDSEDYNTCEGAFGALQKICE     |
| 06:10116 5358 NM_001100692 Tnpol Rattus_norvegicus    | -----RATVGILITTIASKGELQNWPDLLPKLCSLLDSEDYNTCEGAFGALQKICE     |
| 07:10090 5358 NM_001048267 Tnpol Mus_musculus         | -----RATVGILITTIASKGELQNWPDLLPKLCSLLDSEDYNTCEGAFGALQKICE     |
| 07:10090 5358 NM_178716 Tnpol Mus_musculus            | -----RATVGILITTIASKGELQNWPDLLPKLCSLLDSEDYNTCEGAFGALQKICE     |
| 12:7227 5358 NM_001274543 Trn Drosophila_melanogaster | -----RATVGILITTIASNGGLHNWPQLLPSLCEMLDNQDYNVCEGAFSALQKICE     |
| 12:7227 5358 NM_058020 Trn Drosophila_melanogaster    | -----RATVGILITTIASNGGLHNWPQLLPSLCEMLDNQDYNVCEGAFSALQKICE     |
| 12:7227 5358 NM_168160 Trn Drosophila_melanogaster    | -----RATVGILITTIASNGGLHNWPQLLPSLCEMLDNQDYNVCEGAFSALQKICE     |
| 12:7227 5358 NM_168161 Trn Drosophila_melanogaster    | -----RATVGILITTIASNGGLHNWPQLLPSLCEMLDNQDYNVCEGAFSALQKICE     |
| 13:6239 5358 NM_064586 imb-2 Caenorhabditis_elegans   | -----RATVGII VTTIVMEENMCDWPDLLDTLATVLMQPDELMQEGALGALQKVFE    |
| 13:6239 5358 NM_064587 imb-2 Caenorhabditis_elegans   | -----                                                        |
| 15:3702 5358 NM_001036282 TRN1 Arabidopsis_thaliana   | -----RTTVGTIISIVIVNIEGVSGWHELLPALVTCLDSNDLNHMDGAMDALSKICE    |
| 15:3702 5358 NM_124936 TRN1 Arabidopsis_thaliana      | LESSIGYRGATLLGSALQVNDSEELQIWEDSIGSGAEELSRMI--EMNSSI--KLFSIFD |
| 15:3702 5358 NM_127248 TRN1 Arabidopsis_thaliana      | -----RTTVGTIISIVIVNIEGVSGWHELLPALVTCLDSNDLNHMDGAMDALSKICE    |
| 00:1 Ac-SGPGQEA VPLRPKAR                              | -----                                                        |
| 01:9606 5358 0#NP_002261 TNPO1 Homo_sapiens           | D5AEIL---DSDV---LDRPLNI-----MIPKFLQFFKHSSPKIRSHAVA----C      |
| 01:9606 5358 0#NP_694858 TNPO1 Homo_sapiens           | D5AEIL---DSDV---LDRPLNI-----MIPKFLQFFKHSSPKIRSHAVA----C      |





15:3702|5358|NM\_001036282|TRN1|Arabidopsis\_thaliana|MNGLYPHLSEIVAFLLPLLD---DKFPLIRISIS-----CWT----LSR

15:3702|5358|NM\_124936|TRN1|Arabidopsis\_thaliana|IQRLRDKFQALVEFYPTVFTVDARSSPSVSKLTHHIRMTSKAILQRVPRVYQLCNDIVQL

15:3702|5358|NM\_127248|TRN1|Arabidopsis\_thaliana|MNGLYPHLSEIVAFLLPLLD---DKFPLIRISIS-----CWT----LSR

00:1|Ac-SGPGQEA VPLRPKAR

01:9606|5358|0#NP\_002261|TNP01|Homo\_sapiens|YAHWVVSQP--PD-TY--LKPLM---TELLKRILDSNKRQVEAACSASFATLEEEAECTEL

01:9606|5358|0#NP\_694858|TNP01|Homo\_sapiens|YAHWVVSQP--PD-TY--LKPLM---TELLKRILDSNKRQVEAACSASFATLEEEAECTEL

01:9606|5358|NM\_002270|TNP01|Homo\_sapiens|YAHWVVSQP--PD-TY--LKPLM---TELLKRILDSNKRQVEAACSASFATLEEEAECTEL

01:9606|5358|NM\_153188|TNP01|Homo\_sapiens|YAHWVVSQP--PD-TY--LKPLM---TELLKRILDSNKRQVEAACSASFATLEEEAECTEL

04:9913|5358|NM\_001076540|TNP01|Bos\_taurus|YAHWVVSQP--PD-TY--LKPLM---TELLKRILDSNKRQVEAACSASFATLEEEAECTEL

06:10116|5358|NM\_001100692|Tnp01|Rattus\_norvegicus|YAHWVVSQP--PD-TY--LKPLM---TELLKRILDSNKRQVEAACSASFATLEEEAECTEL

07:10090|5358|NM\_001048267|Tnp01|Mus\_musculus|YAHWVVSQP--PD-TY--LKPLM---TELLKRILDSNKRQVEAACSASFATLEEEAECTEL

07:10090|5358|NM\_178716|Tnp01|Mus\_musculus|YAHWVVSQP--PD-TY--LKPLM---TELLKRILDSNKRQVEAACSASFATLEEEAECTEL

12:7227|5358|NM\_001274543|Trn1|Drosophila\_melanogaster|YANWVVNQP--HD-QY--LKPLM---EELLKRILDSNKRQVEAACSASFATLEEEAECTEL

12:7227|5358|NM\_058020|Trn1|Drosophila\_melanogaster|YANWVVNQP--HD-QY--LKPLM---EELLKRILDSNKRQVEAACSASFATLEEEAECTEL

12:7227|5358|NM\_168160|Trn1|Drosophila\_melanogaster|YANWVVNQP--HD-QY--LKPLM---EELLKRILDSNKRQVEAACSASFATLEEEAECTEL

12:7227|5358|NM\_168161|Trn1|Drosophila\_melanogaster|YANWVVNQP--HD-QY--LKPLM---EELLKRILDSNKRQVEAACSASFATLEEEAECTEL

13:6239|5358|NM\_064586|imb-2|Caenorhabditis\_elegans|YSSHIASDENFRQ-QF--FKDVL---ANLLRCSLDGNKKVQEAACSASFATLEEEAGEQL

13:6239|5358|NM\_064587|imb-2|Caenorhabditis\_elegans|-----MAF-QP--DQHEL---EQLLRCSLDGNKKVQEAACSASFATLEEEAGEQL

15:3702|5358|NM\_001036282|TRN1|Arabidopsis\_thaliana|FGKYLIQESGNPK-GYEQFEKVL---MGLLRRLDNTNKRQVEAACSASFATVEEDAAEEL

15:3702|5358|NM\_124936|TRN1|Arabidopsis\_thaliana|LSDWRSENSNKPIMRWKAFADLCQFKVPSLRIKSRNENI QIVETR RHAIATCLHQMGEVI

15:3702|5358|NM\_127248|TRN1|Arabidopsis\_thaliana|FGKYLIQESGNPK-GYEQFEKVL---MGLLRRLDNTNKRQVEAACSASFATVEEDAAEEL

00:1|Ac-SGPGQEA VPLRPKAR

01:9606|5358|0#NP\_002261|TNP01|Homo\_sapiens|-VP-----YLAYILDTLVFAFSKYQHKNLLI-----LYDAIGTL

01:9606|5358|0#NP\_694858|TNP01|Homo\_sapiens|-VP-----YLAYILDTLVFAFSKYQHKNLLI-----LYDAIGTL

01:9606|5358|NM\_002270|TNP01|Homo\_sapiens|-VP-----YLAYILDTLVFAFSKYQHKNLLI-----LYDAIGTL

01:9606|5358|NM\_153188|TNP01|Homo\_sapiens|-VP-----YLAYILDTLVFAFSKYQHKNLLI-----LYDAIGTL

04:9913|5358|NM\_001076540|TNP01|Bos\_taurus|-VP-----YLAYILDTLVFAFSKYQHKNLLI-----LYDAIGTL

06:10116|5358|NM\_001100692|Tnp01|Rattus\_norvegicus|-VP-----YLAYILDTLVFAFSKYQHKNLLI-----LYDAIGTL

07:10090|5358|NM\_001048267|Tnp01|Mus\_musculus|-VP-----YLAYILDTLVFAFSKYQHKNLLI-----LYDAIGTL

07:10090|5358|NM\_178716|Tnp01|Mus\_musculus|-VP-----YLAYILDTLVFAFSKYQHKNLLI-----LYDAIGTL

12:7227|5358|NM\_001274543|Trn1|Drosophila\_melanogaster|-VP-----YLEYILKTLVFAFSKYQHKNLLI-----LYDAVGTL

12:7227|5358|NM\_058020|Trn1|Drosophila\_melanogaster|-VP-----YLEYILKTLVFAFSKYQHKNLLI-----LYDAVGTL

12:7227|5358|NM\_168160|Trn1|Drosophila\_melanogaster|-VP-----YLEYILKTLVFAFSKYQHKNLLI-----LYDAVGTL

12:7227|5358|NM\_168161|Trn1|Drosophila\_melanogaster|-VP-----YLEYILKTLVFAFSKYQHKNLLI-----LYDAVGTL

13:6239|5358|NM\_064586|imb-2|Caenorhabditis\_elegans|-IP-----FLGEILDQLVKAFCQCYQAKNLLI-----LYDAIGTL

13:6239|5358|NM\_064587|imb-2|Caenorhabditis\_elegans|-IP-----FLGEILDQLVKAFCQCYQAKNLLI-----LYDAIGTL

15:3702|5358|NM\_001036282|TRN1|Arabidopsis\_thaliana|-VP-----HLGVILQHLMCAFGKYQRRNLRI-----VYDAIGTL

15:3702|5358|NM\_124936|TRN1|Arabidopsis\_thaliana|YFDDLGLFILDYEWFCGEVLTQLIKLDVRKQSTGERNGFVSRKELEKTLRSSLSQSPIPGM

15:3702|5358|NM\_127248|TRN1|Arabidopsis\_thaliana|-VP-----HLGVILQHLMCAFGKYQRRNLRI-----VYDAIGTL

00:1|Ac-SGPGQEA VPLRPKAR

01:9606|5358|0#NP\_002261|TNP01|Homo\_sapiens|ADSVGHHLNKPEY-----IQMLMPPL-----IQKWNMLKDEDKD

01:9606|5358|0#NP\_694858|TNP01|Homo\_sapiens|ADSVGHHLNKPEY-----IQMLMPPL-----IQKWNMLKDEDKD

01:9606|5358|NM\_002270|TNP01|Homo\_sapiens|ADSVGHHLNKPEY-----IQMLMPPL-----IQKWNMLKDEDKD

01:9606|5358|NM\_153188|TNP01|Homo\_sapiens|ADSVGHHLNKPEY-----IQMLMPPL-----IQKWNMLKDEDKD

04:9913|5358|NM\_001076540|TNP01|Bos\_taurus|ADSVGHHLNKPEY-----IQMLMPPL-----IQKWNMLKDEDKD

06:10116|5358|NM\_001100692|Tnp01|Rattus\_norvegicus|ADSVGHHLNKPEY-----IQMLMPPL-----IQKWNMLKDEDKD

07:10090|5358|NM\_001048267|Tnp01|Mus\_musculus|ADSVGHHLNKPEY-----IQMLMPPL-----IQKWNMLKDEDKD

07:10090|5358|NM\_178716|Tnp01|Mus\_musculus|ADSVGHHLNKPEY-----IQMLMPPL-----IQKWNMLKDEDKD

12:7227|5358|NM\_001274543|Trn1|Drosophila\_melanogaster|ADSVGHHLNKPQY-----IDILMPPL-----IDKWNLLKDDDDKD

12:7227|5358|NM\_058020|Trn1|Drosophila\_melanogaster|ADSVGHHLNKPQY-----IDILMPPL-----IDKWNLLKDDDDKD

12:7227|5358|NM\_168160|Trn1|Drosophila\_melanogaster|ADSVGHHLNKPQY-----IDILMPPL-----IDKWNLLKDDDDKD

12:7227|5358|NM\_168161|Trn1|Drosophila\_melanogaster|ADSVGHHLNKPQY-----IDILMPPL-----IDKWNLLKDDDDKD

13:6239|5358|NM\_064586|imb-2|Caenorhabditis\_elegans|ANSVGDALSHPVY-----VQMLMPPL-----MEKWERLSDEDKE

13:6239|5358|NM\_064587|imb-2|Caenorhabditis\_elegans|ANSVGDALSHPVY-----VQMLMPPL-----MEKWERLSDEDKE

15:3702|5358|NM\_001036282|TRN1|Arabidopsis\_thaliana|ADSVREELNKPAY-----LEILMPPL-----VAKWQQLSNSDKD

15:3702|5358|NM\_124936|TRN1|Arabidopsis\_thaliana|TSKVLEHFDACDLVKMMKKVELCYEQDPSSPDSSLLVPSILEEGRGKTQKWKINTHDCVY

15:3702|5358|NM\_127248|TRN1|Arabidopsis\_thaliana|ADSVREELNKPAY-----LEILMPPL-----VAKWQQLSNSDKD

00:1|Ac-SGPGQEA VPLRPKAR

01:9606|5358|0#NP\_002261|TNP01|Homo\_sapiens|LFPILLECLSSVATALQSGFLPYCEPVYQRCVNLVQKTLAQAMLNNAQPDQYEAPDKD---

01:9606|5358|0#NP\_694858|TNP01|Homo\_sapiens|LFPILLECLSSVATALQSGFLPYCEPVYQRCVNLVQKTLAQAMLNNAQPDQYEAPDKD---

01:9606|5358|NM\_002270|TNP01|Homo\_sapiens|LFPILLECLSSVATALQSGFLPYCEPVYQRCVNLVQKTLAQAMLNNAQPDQYEAPDKD---

01:9606|5358|NM\_153188|TNP01|Homo\_sapiens|LFPILLECLSSVATALQSGFLPYCEPVYQRCVNLVQKTLAQAMLNNAQPDQYEAPDKD---

04:9913|5358|NM\_001076540|TNP01|Bos\_taurus|LFPILLECLSSVATALQSGFLPYCEPVYQRCVNLVQKTLAQAMLNNAQPDQYEAPDKD---

06:10116|5358|NM\_001100692|Tnp01|Rattus\_norvegicus|LFPILLECLSSVATALQSGFLPYCEPVYQRCVNLVQKTLAQAMLNNAQPDQYEAPDKD---

07:10090|5358|NM\_001048267|Tnp01|Mus\_musculus|LFPILLECLSSVATALQSGFLPYCEPVYQRCVNLVQKTLAQAMLNNAQPDQYEAPDKD---

07:10090|5358|NM\_178716|Tnp01|Mus\_musculus|LFPILLECLSSVATALQSGFLPYCEPVYQRCVNLVQKTLAQAMLNNAQPDQYEAPDKD---

12:7227|5358|NM\_001274543|Trn1|Drosophila\_melanogaster|LFPILLECLSSIATALQSGFLPYCDPVYRRCISLIEQTINQEMLCK-QNQT YDHPDKE---

12:7227|5358|NM\_058020|Trn1|Drosophila\_melanogaster|LFPILLECLSSIATALQSGFLPYCDPVYRRCISLIEQTINQEMLCK-QNQT YDHPDKE---

12:7227|5358|NM\_168160|Trn1|Drosophila\_melanogaster|LFPILLECLSSIATALQSGFLPYCDPVYRRCISLIEQTINQEMLCK-QNQT YDHPDKE---

12:7227|5358|NM\_168161|Trn1|Drosophila\_melanogaster|LFPILLECLSSIATALQSGFLPYCDPVYRRCISLIEQTINQEMLCK-QNQT YDHPDKE---

13:6239|5358|NM\_064586|imb-2|Caenorhabditis\_elegans|LFPILLECISAIVSAMGQSFLPYIQPVFTRCCSLIEKCVQQQHIMAPDQVEAPETD---

13:6239|5358|NM\_064587|imb-2|Caenorhabditis\_elegans|LFPILLECISAIVSAMGQSFLPYIQPVFTRCCSLIEKCVQQQHIMAPDQVEAPETD---

15:3702|5358|NM\_001036282|TRN1|Arabidopsis\_thaliana|LFPILLECFTSISQALGVGFAPFAQPVFQRCMDIIQLQQLAKVNPAS---AGA QYDRE---

15:3702|5358|NM\_124936|TRN1|Arabidopsis\_thaliana|SGRHLQCDDSSHMFITAGFFPR LQVHLHNRIMEL-----KNQH GATYSLEKYL

15:3702|5358|NM\_127248|TRN1|Arabidopsis\_thaliana|LFPILLECFTSISQALGVGFAPFAQPVFQRCMDIIQLQQLAKVNPAS---AGA QYDRE---

00:1|Ac-SGPGQEA VPLRPKAR

01:9606|5358|0#NP\_002261|TNP01|Homo\_sapiens --FMIVALDLLSGLAEGGLGGNIEQLVARSNILT-----  
01:9606|5358|0#NP\_694858|TNP01|Homo\_sapiens --FMIVALDLLSGLAEGGLGGNIEQLVARSNILT-----  
01:9606|5358|NM\_002270|TNP01|Homo\_sapiens --FMIVALDLLSGLAEGGLGGNIEQLVARSNILT-----  
01:9606|5358|NM\_153188|TNP01|Homo\_sapiens --FMIVALDLLSGLAEGGLGGNIEQLVARSNILT-----  
04:9913|5358|NM\_001076540|TNP01|Bos\_taurus --FMIVALDLLSGLAEGGLGGNIEQLVARSNILT-----  
06:10116|5358|NM\_001100692|Tnp01|Rattus\_norvegicus --FMIVALDLLSGLAEGGLGGNIEQLVARSNILT-----  
07:10090|5358|NM\_001048267|Tnp01|Mus\_musculus --FMIVALDLLSGLAEGGLGGNIEQLVARSNILT-----  
07:10090|5358|NM\_178716|Tnp01|Mus\_musculus --FMIVALDLLSGLAEGGLGGNIEQLVARSNILT-----  
12:7227|5358|NM\_001274543|Trn|Drosophila\_melanogaster --RMIVALDLLSGLAEGGLDRHIETLVANSNIMH-----  
12:7227|5358|NM\_058020|Trn|Drosophila\_melanogaster --RMIVALDLLSGLAEGGLDRHIETLVANSNIMH-----  
12:7227|5358|NM\_168160|Trn|Drosophila\_melanogaster --RMIVALDLLSGLAEGGLDRHIETLVANSNIMH-----  
12:7227|5358|NM\_168161|Trn|Drosophila\_melanogaster --RMIVALDLLSGLAEGGLDRHIETLVANSNIMH-----  
13:6239|5358|NM\_064586|imb-2|Caenorhabditis\_elegans --FIIVALDLLSGLAESLPEHMDPLVANSKLVE-----  
13:6239|5358|NM\_064587|imb-2|Caenorhabditis\_elegans --FIIVALDLLSGLAESLPEHMDPLVANSKLVE-----  
15:3702|5358|NM\_001036282|TRN1|Arabidopsis\_thaliana --FIVCSLDLLSGLAEGGLSGGIESLVQQSNLRD-----  
15:3702|5358|NM\_124936|TRN1|Arabidopsis\_thaliana IAITIHGINIRVELGGQLGNYIDVLACSSKSLETETLRLIHQLIIPAIQSSCRGVILLEHI  
15:3702|5358|NM\_127248|TRN1|Arabidopsis\_thaliana --FIVCSLDLLSGLAEGGLSGGIESLVQQSNLRD-----

00:1|Ac-SGPGQAEVPLRPKAR -----  
01:9606|5358|0#NP\_002261|TNP01|Homo\_sapiens LMYQCMQDKM-PEVRQSSFALLGDLTKACFQHVKPCIADFMPIL-----GTN  
01:9606|5358|0#NP\_694858|TNP01|Homo\_sapiens LMYQCMQDKM-PEVRQSSFALLGDLTKACFQHVKPCIADFMPIL-----GTN  
01:9606|5358|NM\_002270|TNP01|Homo\_sapiens LMYQCMQDKM-PEVRQSSFALLGDLTKACFQHVKPCIADFMPIL-----GTN  
01:9606|5358|NM\_153188|TNP01|Homo\_sapiens LMYQCMQDKM-PEVRQSSFALLGDLTKACFQHVKPCIADFMPIL-----GTN  
04:9913|5358|NM\_001076540|TNP01|Bos\_taurus LMYQCMQDKM-PEVRQSSFALLGDLTKACFQHVKPCIADFMPIL-----GTN  
06:10116|5358|NM\_001100692|Tnp01|Rattus\_norvegicus LMYQCMQDKM-PEVRQSSFALLGDLTKACFQHVKPCIADFMPIL-----GTN  
07:10090|5358|NM\_001048267|Tnp01|Mus\_musculus LMYQCMQDKM-PEVRQSSFALLGDLTKACFQHVKPCIADFMPIL-----GTN  
07:10090|5358|NM\_178716|Tnp01|Mus\_musculus LMYQCMQDKM-PEVRQSSFALLGDLTKACFQHVKPCIADFMPIL-----GTN  
12:7227|5358|NM\_001274543|Trn|Drosophila\_melanogaster LLYQCMQDVL-PEVRQSSFALLGDLTKACFPHVHPFMAFFPIL-----GQN  
12:7227|5358|NM\_058020|Trn|Drosophila\_melanogaster LLYQCMQDVL-PEVRQSSFALLGDLTKACFPHVHPFMAFFPIL-----GQN  
12:7227|5358|NM\_168160|Trn|Drosophila\_melanogaster LLYQCMQDVL-PEVRQSSFALLGDLTKACFPHVHPFMAFFPIL-----GQN  
12:7227|5358|NM\_168161|Trn|Drosophila\_melanogaster LLYQCMQDVL-PEVRQSSFALLGDLTKACFPHVHPFMAFFPIL-----GQN  
13:6239|5358|NM\_064586|imb-2|Caenorhabditis\_elegans LMLFCSLDVT-PDVRQSCFALLGDLTKACPERVLPQSSNFIFFL-----AQN  
13:6239|5358|NM\_064587|imb-2|Caenorhabditis\_elegans LMLFCSLDVT-PDVRQSCFALLGDLTKACPERVLPQSSNFIFFL-----AQN  
15:3702|5358|NM\_001036282|TRN1|Arabidopsis\_thaliana LLLNCCIDEA-ADVRQSAPALMGDLARVFPVYLQPRLLDFLEIASQQL-----SAN  
15:3702|5358|NM\_124936|TRN1|Arabidopsis\_thaliana IRPQCVDLTTPRFRQSQFVSLHRLKEALSSVPAETMYDYQHTWDSVLD SGKTVLRAGFD  
15:3702|5358|NM\_127248|TRN1|Arabidopsis\_thaliana LLLNCCIDEA-ADVRQSAPALMGDLARVFPVYLQPRLLDFLEIASQQL-----SAN

00:1|Ac-SGPGQAEVPLRPKAR -----  
01:9606|5358|0#NP\_002261|TNP01|Homo\_sapiens LNPE-----FISVCNNATWAIGEISIQMG-----I-----EMQPYI---  
01:9606|5358|0#NP\_694858|TNP01|Homo\_sapiens LNPE-----FISVCNNATWAIGEISIQMG-----I-----EMQPYI---  
01:9606|5358|NM\_002270|TNP01|Homo\_sapiens LNPE-----FISVCNNATWAIGEISIQMG-----I-----EMQPYI---  
01:9606|5358|NM\_153188|TNP01|Homo\_sapiens LNPE-----FISVCNNATWAIGEISIQMG-----I-----EMQPYI---  
04:9913|5358|NM\_001076540|TNP01|Bos\_taurus LNPE-----FISVCNNATWAIGEISIQMG-----I-----EMQPYI---  
06:10116|5358|NM\_001100692|Tnp01|Rattus\_norvegicus LNPE-----FISVCNNATWAIGEISIQMG-----I-----EMQPYI---  
07:10090|5358|NM\_001048267|Tnp01|Mus\_musculus LNPE-----FISVCNNATWAIGEISIQMG-----I-----EMQPYI---  
07:10090|5358|NM\_178716|Tnp01|Mus\_musculus LNPE-----FISVCNNATWAIGEISIQMG-----I-----EMQPYI---  
12:7227|5358|NM\_001274543|Trn|Drosophila\_melanogaster LNPd-----FISVCNNATWAIGEICMKLG-----E-----ETKQYI---  
12:7227|5358|NM\_058020|Trn|Drosophila\_melanogaster LNPd-----FISVCNNATWAIGEICMKLG-----E-----ETKQYI---  
12:7227|5358|NM\_168160|Trn|Drosophila\_melanogaster LNPd-----FISVCNNATWAIGEICMKLG-----E-----ETKQYI---  
12:7227|5358|NM\_168161|Trn|Drosophila\_melanogaster LNPd-----FISVCNNATWAIGEICMKLG-----E-----ETKQYI---  
13:6239|5358|NM\_064586|imb-2|Caenorhabditis\_elegans LDPS-----KISVCNNAIWALGELALKMG-----P-----AMKQFI---  
13:6239|5358|NM\_064587|imb-2|Caenorhabditis\_elegans LDPS-----KISVCNNAIWALGELALKMG-----P-----AMKQFI---  
15:3702|5358|NM\_001036282|TRN1|Arabidopsis\_thaliana LNRE-----NLSVANNACWAIGELAVKVR-----Q-----EVSPIV---  
15:3702|5358|NM\_124936|TRN1|Arabidopsis\_thaliana LARLLSDDDFREVLQRRYHDLHNLAQELQVPTDENPEADNHVPVTNELEKVDPSFGGIA  
15:3702|5358|NM\_127248|TRN1|Arabidopsis\_thaliana LNRE-----NLSVANNACWAIGELAVKVR-----Q-----EVSPIV---

00:1|Ac-SGPGQAEVPLRPKAR -----  
01:9606|5358|0#NP\_002261|TNP01|Homo\_sapiens ---PMVLHQLVEI-----IN-R-----  
01:9606|5358|0#NP\_694858|TNP01|Homo\_sapiens ---PMVLHQLVEI-----IN-R-----  
01:9606|5358|NM\_002270|TNP01|Homo\_sapiens ---PMVLHQLVEI-----IN-R-----  
01:9606|5358|NM\_153188|TNP01|Homo\_sapiens ---PMVLHQLVEI-----IN-R-----  
04:9913|5358|NM\_001076540|TNP01|Bos\_taurus ---PMVLHQLVEI-----IN-R-----  
06:10116|5358|NM\_001100692|Tnp01|Rattus\_norvegicus ---PMVLHQLVEI-----IN-R-----  
07:10090|5358|NM\_001048267|Tnp01|Mus\_musculus ---PMVLHQLVEI-----IN-R-----  
07:10090|5358|NM\_178716|Tnp01|Mus\_musculus ---PMVLHQLVEI-----IN-R-----  
12:7227|5358|NM\_001274543|Trn|Drosophila\_melanogaster ---RLVLSDLFII-----IN-R-----  
12:7227|5358|NM\_058020|Trn|Drosophila\_melanogaster ---RLVLSDLFII-----IN-R-----  
12:7227|5358|NM\_168160|Trn|Drosophila\_melanogaster ---RLVLSDLFII-----IN-R-----  
12:7227|5358|NM\_168161|Trn|Drosophila\_melanogaster ---RLVLSDLFII-----IN-R-----  
13:6239|5358|NM\_064586|imb-2|Caenorhabditis\_elegans ---GPIIEPLIVV-----INSQ-----  
13:6239|5358|NM\_064587|imb-2|Caenorhabditis\_elegans ---GPIIEPLIVV-----INSQ-----  
15:3702|5358|NM\_001036282|TRN1|Arabidopsis\_thaliana ---AKVSSSLGLI-----LQH-----  
15:3702|5358|NM\_124936|TRN1|Arabidopsis\_thaliana KGVEAVLQRLKIIIEQEI RDLKQEIQGLRYYEHRLLIQLHHKVNLYLVNINVQMDERKVPNM  
15:3702|5358|NM\_127248|TRN1|Arabidopsis\_thaliana ---AKVSSSLGLI-----LQH-----

00:1|Ac-SGPGQAEVPLRPKAR -----  
01:9606|5358|0#NP\_002261|TNP01|Homo\_sapiens -----PNTPKTLL-----ENTAITIGRLGYVCPQEVAP  
01:9606|5358|0#NP\_694858|TNP01|Homo\_sapiens -----PNTPKTLL-----ENTAITIGRLGYVCPQEVAP  
01:9606|5358|NM\_002270|TNP01|Homo\_sapiens -----PNTPKTLL-----ENTAITIGRLGYVCPQEVAP  
01:9606|5358|NM\_153188|TNP01|Homo\_sapiens -----PNTPKTLL-----ENTAITIGRLGYVCPQEVAP  
04:9913|5358|NM\_001076540|TNP01|Bos\_taurus -----PNTPKTLL-----ENTAITIGRLGYVCPQEVAP  
06:10116|5358|NM\_001100692|Tnp01|Rattus\_norvegicus -----PNTPKTLL-----ENTAITIGRLGYVCPQEVAP

07:10090|5358|NM\_001048267|Tnpol|Mus\_musculus  
07:10090|5358|NM\_178716|Tnpol|Mus\_musculus  
12:7227|5358|NM\_001274543|Trn|Drosophila\_melanogaster  
12:7227|5358|NM\_058020|Trn|Drosophila\_melanogaster  
12:7227|5358|NM\_168160|Trn|Drosophila\_melanogaster  
12:7227|5358|NM\_168161|Trn|Drosophila\_melanogaster  
13:6239|5358|NM\_064586|imb-2|Caenorhabditis\_elegans  
13:6239|5358|NM\_064587|imb-2|Caenorhabditis\_elegans  
15:3702|5358|NM\_001036282|TRN1|Arabidopsis\_thaliana  
15:3702|5358|NM\_124936|TRN1|Arabidopsis\_thaliana  
15:3702|5358|NM\_127248|TRN1|Arabidopsis\_thaliana

00:1|Ac-SGPGQEA VPLRPKAR  
01:9606|5358|0#NP\_002261|TNP01|Homo\_sapiens  
01:9606|5358|0#NP\_694858|TNP01|Homo\_sapiens  
01:9606|5358|NM\_002270|TNP01|Homo\_sapiens  
01:9606|5358|NM\_153188|TNP01|Homo\_sapiens  
04:9913|5358|NM\_001076540|TNP01|Bos\_taurus  
06:10116|5358|NM\_001100692|Tnpol|Rattus\_norvegicus  
07:10090|5358|NM\_001048267|Tnpol|Mus\_musculus  
07:10090|5358|NM\_178716|Tnpol|Mus\_musculus  
12:7227|5358|NM\_001274543|Trn|Drosophila\_melanogaster  
12:7227|5358|NM\_058020|Trn|Drosophila\_melanogaster  
12:7227|5358|NM\_168160|Trn|Drosophila\_melanogaster  
12:7227|5358|NM\_168161|Trn|Drosophila\_melanogaster  
13:6239|5358|NM\_064586|imb-2|Caenorhabditis\_elegans  
13:6239|5358|NM\_064587|imb-2|Caenorhabditis\_elegans  
15:3702|5358|NM\_001036282|TRN1|Arabidopsis\_thaliana  
15:3702|5358|NM\_124936|TRN1|Arabidopsis\_thaliana  
15:3702|5358|NM\_127248|TRN1|Arabidopsis\_thaliana

00:1|Ac-SGPGQEA VPLRPKAR  
01:9606|5358|0#NP\_002261|TNP01|Homo\_sapiens  
01:9606|5358|0#NP\_694858|TNP01|Homo\_sapiens  
01:9606|5358|NM\_002270|TNP01|Homo\_sapiens  
01:9606|5358|NM\_153188|TNP01|Homo\_sapiens  
04:9913|5358|NM\_001076540|TNP01|Bos\_taurus  
06:10116|5358|NM\_001100692|Tnpol|Rattus\_norvegicus  
07:10090|5358|NM\_001048267|Tnpol|Mus\_musculus  
07:10090|5358|NM\_178716|Tnpol|Mus\_musculus  
12:7227|5358|NM\_001274543|Trn|Drosophila\_melanogaster  
12:7227|5358|NM\_058020|Trn|Drosophila\_melanogaster  
12:7227|5358|NM\_168160|Trn|Drosophila\_melanogaster  
12:7227|5358|NM\_168161|Trn|Drosophila\_melanogaster  
13:6239|5358|NM\_064586|imb-2|Caenorhabditis\_elegans  
13:6239|5358|NM\_064587|imb-2|Caenorhabditis\_elegans  
15:3702|5358|NM\_001036282|TRN1|Arabidopsis\_thaliana  
15:3702|5358|NM\_124936|TRN1|Arabidopsis\_thaliana  
15:3702|5358|NM\_127248|TRN1|Arabidopsis\_thaliana

00:1|Ac-SGPGQEA VPLRPKAR  
01:9606|5358|0#NP\_002261|TNP01|Homo\_sapiens  
01:9606|5358|0#NP\_694858|TNP01|Homo\_sapiens  
01:9606|5358|NM\_002270|TNP01|Homo\_sapiens  
01:9606|5358|NM\_153188|TNP01|Homo\_sapiens  
04:9913|5358|NM\_001076540|TNP01|Bos\_taurus  
06:10116|5358|NM\_001100692|Tnpol|Rattus\_norvegicus  
07:10090|5358|NM\_001048267|Tnpol|Mus\_musculus  
07:10090|5358|NM\_178716|Tnpol|Mus\_musculus  
12:7227|5358|NM\_001274543|Trn|Drosophila\_melanogaster  
12:7227|5358|NM\_058020|Trn|Drosophila\_melanogaster  
12:7227|5358|NM\_168160|Trn|Drosophila\_melanogaster  
12:7227|5358|NM\_168161|Trn|Drosophila\_melanogaster  
13:6239|5358|NM\_064586|imb-2|Caenorhabditis\_elegans  
13:6239|5358|NM\_064587|imb-2|Caenorhabditis\_elegans  
15:3702|5358|NM\_001036282|TRN1|Arabidopsis\_thaliana  
15:3702|5358|NM\_124936|TRN1|Arabidopsis\_thaliana  
15:3702|5358|NM\_127248|TRN1|Arabidopsis\_thaliana

00:1|Ac-SGPGQEA VPLRPKAR  
01:9606|5358|0#NP\_002261|TNP01|Homo\_sapiens  
01:9606|5358|0#NP\_694858|TNP01|Homo\_sapiens  
01:9606|5358|NM\_002270|TNP01|Homo\_sapiens  
01:9606|5358|NM\_153188|TNP01|Homo\_sapiens  
04:9913|5358|NM\_001076540|TNP01|Bos\_taurus  
06:10116|5358|NM\_001100692|Tnpol|Rattus\_norvegicus  
07:10090|5358|NM\_001048267|Tnpol|Mus\_musculus  
07:10090|5358|NM\_178716|Tnpol|Mus\_musculus  
12:7227|5358|NM\_001274543|Trn|Drosophila\_melanogaster  
12:7227|5358|NM\_058020|Trn|Drosophila\_melanogaster  
12:7227|5358|NM\_168160|Trn|Drosophila\_melanogaster  
12:7227|5358|NM\_168161|Trn|Drosophila\_melanogaster

-----PNTPKTLL-----ENTAITIGRLGYVCPQEVAP  
-----PNTPKTLL-----ENTAITIGRLGYVCPQEVAP  
-----PNTPKTLL-----ENTAITIGRLGYVCPVEVAP  
-----PNTPKTLL-----ENTAITIGRLGYVCPVEVAP  
-----PNTPKTLL-----ENTAITIGRLGYVCPVEVAP  
-----PNTPKTLL-----ENTAITIGRLGYVCPVEVAP  
-----QNMQR TLL-----ENTAITIGRLGQCCGEELAP  
-----QNMQR TLL-----ENTAITIGRLGQCCGEELAP  
-----EGVNKALV-----ENSAITLGLRLAWIRPDLVAP  
FYFIRAENYGRRLITSMVPGMVALRIHMLCEFRREMHVVEDQLGCDVMQIDNQA VKCLAP  
-----EGVNKALV-----ENSAITLGLRLAWIRPDLVAP

MLQQFIRPWCTSLRNIRDNEEKDSAFRGICTMISVNP SGVIQD FIFFCD AVASWINP-KD  
YLPEFVRQWCTSLRHIRDNEEKDSAFRGMCHMITVNPAGVVAD FIFFCD AIASWVNP-PE  
YLPEFVRQWCTSLRHIRDNEEKDSAFRGMCHMITVNPAGVVAD FIFFCD AIASWVNP-PE  
YLPEFVRQWCTSLRHIRDNEEKDSAFRGMCHMITVNPAGVVAD FIFFCD AIASWVNP-PE  
YLPEFVRQWCTSLRHIRDNEEKDSAFRGMCHMITVNPAGVVAD FIFFCD AIASWVNP-PE  
HISR FVRPCCYSLRNIKDNAEKESAFI GLCNMNMNMPVGV LND FIFWCD AIASWTVP-TD  
HISR FVRPCCYSLRNIKDNAEKESAFI GLCNMNMNMPVGV LND FIFWCD AIASWTVP-TD  
HMDHFMKPWCMA LMSVRDDIEKEDAFRGLCAVVKVNP SGGVSSLVFICQAIASWHEIRSE  
YMTNFMKLVTFALRI-----  
HMDHFMKPWCMA LMSVRDDIEKEDAFRGLCAVVKVNP SGGVSSLVFICQAIASWHEIRSE

DLRDMFCKILHGFKNQVG DENWRRFSDQFP LPLKERLA AFYGV-----  
DLHQM IQKILHGFKTQVGEENWRRFVEQFP PTLAERLT TMYNI-----  
DLHQM IQKILHGFKTQVGEENWRRFVEQFP PTLAERLT TMYNI-----  
DLHQM IQKILHGFKTQVGEENWRRFVEQFP PTLAERLT TMYNI-----  
DLHQM IQKILHGFKTQVGEENWRRFVEQFP PTLAERLT TMYNI-----  
SLRVLFAGILQSF KQVGD FNWNNFILQLPPPLRERLSAFYQI-----  
SLRVLFAGILQSF KQVGD FNWNNFILQLPPPLRERLSAFYQI-----  
DVQTEVSQVLNGYKHMLGN-SWAECLSALDPPVKERLARYQV-----  
-----GA-NWAAGMGHMIPDL SHTIAHLANPAVMTGAAGAAGI GVAA  
DVQTEVSQVLNGYKHMLGN-SWAECLSALDPPVKERLARYQV-----

ALGRNRGRDRDIQE EQRAAQWLIDYLR EQTCSTGRDIAEKFGLWRVRYRDDGSI AWIC

|         |      |              |       |                        |                  |
|---------|------|--------------|-------|------------------------|------------------|
| 13:6239 | 5358 | NM_064586    | imb-2 | Caenorhabditis_elegans | -----            |
| 13:6239 | 5358 | NM_064587    | imb-2 | Caenorhabditis_elegans | -----            |
| 15:3702 | 5358 | NM_001036282 | TRN1  | Arabidopsis_thaliana   | -----            |
| 15:3702 | 5358 | NM_124936    | TRN1  | Arabidopsis_thaliana   | KRHMITRAHEVIQVPL |
| 15:3702 | 5358 | NM_127248    | TRN1  | Arabidopsis_thaliana   | -----            |

*THOP1*

Ac-AAVAAVGPR

CLUSTAL O(1.2.1) multiple sequence alignment

00:1|Ac-AAVAAVGPR  
01:9606|55726|0#NP\_003240|THOP1|Homo\_sapiens  
01:9606|55726|NM\_003249|THOP1|Homo\_sapiens  
04:9913|55726|NM\_001033991|THOP1|Bos\_taurus  
06:10116|55726|NM\_172075|Thop1|Rattus\_norvegicus  
07:10090|55726|NM\_022653|Thop1|Mus\_musculus  
09:8364|55726|NM\_001078941|thop1|Xenopus\_tropicalis  
10:7955|55726|NM\_001002355|zgc:92139|Danio\_rerio  
15:3702|55726|NM\_105437|At1G67690|Arabidopsis\_thaliana

00:1|Ac-AAVAAVGPR  
01:9606|55726|0#NP\_003240|THOP1|Homo\_sapiens  
01:9606|55726|NM\_003249|THOP1|Homo\_sapiens  
04:9913|55726|NM\_001033991|THOP1|Bos\_taurus  
06:10116|55726|NM\_172075|Thop1|Rattus\_norvegicus  
07:10090|55726|NM\_022653|Thop1|Mus\_musculus  
09:8364|55726|NM\_001078941|thop1|Xenopus\_tropicalis  
10:7955|55726|NM\_001002355|zgc:92139|Danio\_rerio  
15:3702|55726|NM\_105437|At1G67690|Arabidopsis\_thaliana

00:1|Ac-AAVAAVGPR  
01:9606|55726|0#NP\_003240|THOP1|Homo\_sapiens  
01:9606|55726|NM\_003249|THOP1|Homo\_sapiens  
04:9913|55726|NM\_001033991|THOP1|Bos\_taurus  
06:10116|55726|NM\_172075|Thop1|Rattus\_norvegicus  
07:10090|55726|NM\_022653|Thop1|Mus\_musculus  
09:8364|55726|NM\_001078941|thop1|Xenopus\_tropicalis  
10:7955|55726|NM\_001002355|zgc:92139|Danio\_rerio  
15:3702|55726|NM\_105437|At1G67690|Arabidopsis\_thaliana

00:1|Ac-AAVAAVGPR  
01:9606|55726|0#NP\_003240|THOP1|Homo\_sapiens  
01:9606|55726|NM\_003249|THOP1|Homo\_sapiens  
04:9913|55726|NM\_001033991|THOP1|Bos\_taurus  
06:10116|55726|NM\_172075|Thop1|Rattus\_norvegicus  
07:10090|55726|NM\_022653|Thop1|Mus\_musculus  
09:8364|55726|NM\_001078941|thop1|Xenopus\_tropicalis  
10:7955|55726|NM\_001002355|zgc:92139|Danio\_rerio  
15:3702|55726|NM\_105437|At1G67690|Arabidopsis\_thaliana

00:1|Ac-AAVAAVGPR  
01:9606|55726|0#NP\_003240|THOP1|Homo\_sapiens  
01:9606|55726|NM\_003249|THOP1|Homo\_sapiens  
04:9913|55726|NM\_001033991|THOP1|Bos\_taurus  
06:10116|55726|NM\_172075|Thop1|Rattus\_norvegicus  
07:10090|55726|NM\_022653|Thop1|Mus\_musculus  
09:8364|55726|NM\_001078941|thop1|Xenopus\_tropicalis  
10:7955|55726|NM\_001002355|zgc:92139|Danio\_rerio  
15:3702|55726|NM\_105437|At1G67690|Arabidopsis\_thaliana

00:1|Ac-AAVAAVGPR  
01:9606|55726|0#NP\_003240|THOP1|Homo\_sapiens  
01:9606|55726|NM\_003249|THOP1|Homo\_sapiens  
04:9913|55726|NM\_001033991|THOP1|Bos\_taurus  
06:10116|55726|NM\_172075|Thop1|Rattus\_norvegicus  
07:10090|55726|NM\_022653|Thop1|Mus\_musculus  
09:8364|55726|NM\_001078941|thop1|Xenopus\_tropicalis  
10:7955|55726|NM\_001002355|zgc:92139|Danio\_rerio  
15:3702|55726|NM\_105437|At1G67690|Arabidopsis\_thaliana

00:1|Ac-AAVAAVGPR  
01:9606|55726|0#NP\_003240|THOP1|Homo\_sapiens  
01:9606|55726|NM\_003249|THOP1|Homo\_sapiens  
04:9913|55726|NM\_001033991|THOP1|Bos\_taurus  
06:10116|55726|NM\_172075|Thop1|Rattus\_norvegicus  
07:10090|55726|NM\_022653|Thop1|Mus\_musculus  
09:8364|55726|NM\_001078941|thop1|Xenopus\_tropicalis  
10:7955|55726|NM\_001002355|zgc:92139|Danio\_rerio  
15:3702|55726|NM\_105437|At1G67690|Arabidopsis\_thaliana

00:1|Ac-AAVAAVGPR  
01:9606|55726|0#NP\_003240|THOP1|Homo\_sapiens  
01:9606|55726|NM\_003249|THOP1|Homo\_sapiens  
04:9913|55726|NM\_001033991|THOP1|Bos\_taurus  
06:10116|55726|NM\_172075|Thop1|Rattus\_norvegicus  
07:10090|55726|NM\_022653|Thop1|Mus\_musculus

-----AAVAAVGP-R-----  
-----  
-----PGSAGGGPLGPQAAVAVAAVGPR-QAASVAEVAGRVA--GGRREGAAGADP  
-----ARVRRAPRCGHLRSLSGRKEAAGRCADTDQVEAGAAGAHF  
-----SELPRRPGPHRRDQRRACPSRAQP  
-----GELRGDPDRTGVRTRGGSPSPRAQP  
-----ELEEQR  
-----LS  
MTENEGNDKKIEGSPNPKK---KLNVTTF-----TGAAGLLGLAVSFAIFTFKSHK

-----  
--MKPPAACAGDMADAASPCSVVNDLRWDLQAQQIEERTRELIEQTKRVYDQVGTQEFED  
PAMKPPAACAGDMADAASPCSVVNDLRWDLQAQQIEERTRELIEQTKRVYDQVGTQEFED  
PAMKPPAACTGDALDVVAPCSAVNHLRWDLQAQQIAELTTELIEQTKRVYDRVGAQEPQD  
AAMKPPAACAGDVVDTVSPCSTVNHLRWDLQAQQIRALTTLQIEQTKCVYDRVGAQDFED  
TAMKPPAACAGDVVDAASPASTVNHLRWDLQAQQIRALTTLQIEQTKCVYDRVGAQNFED  
NHMAPTGHMME----PQFKNDENRLRWDLTPEQIEILTGEVIEQTKRVYDQVGNLDLSS  
REMAPTGE---VVFSGSDRVCDNRLRWDLTPEQINQLTEELIAKTKKVYDTVGALDLDS  
Q-----KSKKKGLP--GCDTVCVNLSAKEILDLAEBEIIHKSTRVHDAVALVSLDK

-----  
VSYESTLKALADVEVTTYTVQRNILDFFPQHVSPPSKDIRTASTEADKKLSEFDVEMSMREDV  
VSYESTLKALADVEVTTYTVQRNILDFFPQHVSPPSKDIRTASTEADKKLSEFDVEMSMREDV  
VSYENTLKALADVEVSITYTVQRNILDFFPQHVSPPSKDIRTASTEADKKLSEFDVEMSMRQDV  
VSYESTLKALADVEVTTYTVQRNILDFFPQHVSPPSKDIRTASTEADKKLSEFDVEMSMRQDV  
VSYESTLKALADVEVTTYTVQRNILDFFPQHVSPPCKDIRAASTEADKKLSEFDVEMSMRQDV  
VTYESTLKALADVEVEYSVKRSMDFPQHVSPPSKEIRAASTEADKKLSEFDVEKSMREDV  
VNYENTLKALADVEVEYTVQRNMLDFFPQHVSPPSKDVRSASTEADKKLSEFDVEMSMREDV  
LSYENVVLPLAELEARQLSLIQCCVFPKMLSPHDNVRKASTAEQKIDAHILSCKKREDV

-----  
YQRIVWLQEKVQKDSLRPEAARYLERLIKLGRNGLHLPRETQENIKRIKKKLSLLCIDF  
YQRIVWLQEKVQKDSLRPEAARYLERLIKLGRNGLHLPRETQENIKRIKKKLSLLCIDF  
YQRIVWLQEKVQKDSLRPEASRYLERLIKLGRNGLHLPEETQEKIKSIKKKLSLLCIDF  
YQRVVWLQEKIPKDSLKPEAARYLERLIKLGRNGLHLPQDTQEKIKNIKKRSLLLCIDF  
YQRVVWLQEKTPKDSLKPEAARYLERLIKLGRNGLHLPQDTQEKIKNIKKRSLLLCIDF  
YRRIEHLQTVIPCDTLQPEAKRFLERLIKMGQRNGNLASDTQQKIKSIQKKMSNIDF  
YQRIVVALEEKLPESGLSPEAKRYMERLIKLGRNGLHLPKVTQEBIKIKKLSLTLCIDF  
YRIIKIYAA--KGESISPEAKCYLQCLVRDFEDNGLNLTAIKREEVERLKYEIDELSLRY

-----  
NKNLNNEDTTFLPFTLQELGGLPEDFLNSLEKMEDGKLVTLKYPHYFPLKKCHVPETRR  
NKNLNNEDTTFLPFTLQELGGLPEDFLNSLEKMEDGKLVTLKYPHYFPLKKCHVPETRR  
NKNLNNEDTTFLPFTREELGGLPEDFLNSLEKTEDEKLVTLKYPHYFPLKKCHVPETRR  
NKNLNNEDTTFLPFTREELGGLPEDFLNSLEKTEDGKLVTLKYPHYFPLKKCHVPETRR  
NKNLNNEDTTFLPFTREELGGLPEDFLSSLEKADGKLVTLKYPHYFPLKKCHVPETRR  
NKNLNNEDTTFLPFTSREELGGLPDDFLNSLEKADGKLVTLKYPHYFPLMKKCFIPDTRQ  
NKNLNNEDTTCLHFSREELGGLPEDFLNSLEKDESGKLVTLKYPHYFPTMKKCFVPETRK  
IQNLNEDSSCLFFTEDELAGLPLEFLQNLEKTQNKEFKLTLESRHVAAILLCKIAKTRK

-----  
KVEEAFNCRCKEENCAILKELVTLRAQKSRLLGFTHADYVLENNMAKTSQTVATFLDEL  
KVEEAFNCRCKEENCAILKELVTLRAQKSRLLGFTHADYVLENNMAKTSQTVATFLDEL  
KVEEAFNCRCKEENCAILRELVRRAQKSRLLGFTHADYVLENNMAKTSQVATFLDEL  
LLEEAFNCRCKEENCAILKELVSLRAQKSRLLGFTHADYVLENNMAKTSQTVATFLDEL  
LLEEAFNCRCKEENCAILKELVSLRAQKSRLLGFTHADYVLENNMAKTSQTVATFLDEL  
KVETAFNSRCKEENSRIQLQELVQLREQKSRLLGFTHADFAVENMMAKNSSTTVASFLEEL  
KLEEAFNSRCKEENSAILKELVNLRAQKSRLLGFTSHSDVLENNMAKSSKKVSTFLDEL  
TVAMAYGKRCGDTNIPVLQRLVQSRHRLACVCGYAHFADYALDRMSKTSMRVIRFLEDI

-----  
AQKLKPLGEQERAVILELKRAECERRGLPFDGRIRAWDMRYMNVQVEETRYCVDQNLKE  
AQKLKPLGEQERAVILELKRAECERRGLPFDGRIRAWDMRYMNVQVEETRYCVDQNLKE  
AQKLKPLGEQERAVILELKRAECERGLAFDGRINAWDMRYMNVQVEETRYRVDQNLKE  
ARKLKPLGEQERAVILELKEAECARGLPFDGRIRAWDMRYMNVQVEETRYRVDQNLKE  
AQKLKPLGEQERAVILELKEAECARGLPFDGRIRAWDMRYMNVQVEETRYRVDQNLKE  
SKKLKPLGEKERSIILQLKKKECEKRGDLFDNQINAWDMRYMNVQVEETTSYVDQNLKE  
SHKLKPLGEKERAVILKKEQECQKRNLPFTGELYAWDTRYMTQVEETQYAVDQNLKE  
SSSLDLAIREFSILEDLKRKEEGE--IPF---GVEDLLYYIKRVEELQFDLDFGDIRQ

-----  
YFPVQVVTGHLGLGIYQELLGLAFHHEEGASAWHEDVRLYRTARDAASGEVVGKFYLDLYPR  
YFPVQVVTGHLGLGIYQELLGLAFHHEEGASAWHEDVRLYRTARDAASGEVVGKFYLDLYPR  
YFPMQVVTGHLGLGIYQELLGLSFQLEEGAAVWHEDVALYAVRDAASGKLGKFYLDLYPR  
YFPMQVVTGHLGLGIYQELLGLTFTLEEGAAWHEDVRLYSVRDAASGEEIGKFYLDLYPR  
YFPMQVVTGHLGLGIYQELLGLTFTLEEGAAWHEDVRLYSVRDAASGEEIGKFYLDLYPR

FFPMEVVTTLGLGIYQELLGLTFELEKGAAVWHEDVLSFSVRDDTTGQLIGKFYLDLHPR  
YFPMEVVTTLGLLDIYQELLNLTFEQVEGAPVWHDDVLSYCVKDRSSGLVVGQFYLDLFP  
YFPVNLVLSGIFKICQDLFGIKFEVEVTDVWYHDIRAFVDFSGSGKLLGYFYLDMFTR

EGKYGHAACFGLQPGCLRQDGSQRQIAIAAMVANFTKPTADAPSLQLQHDEVETYFHEFGHV  
EGKYGHAACFGLQPGCLRQDGSQRQIAIAAMVANFTKPTADAPSLQLQHDEVETYFHEFGHV  
EGKYGHAACFGLQPGCLRKDGSRQIAIAAMVANFTKPTADAPSLQLQHDEVETYFHEFGHV  
EGKYGHAACFGLQPGCLRQDGSQRQIAIAAMVANFTKPTDPVPSLLQHDEVETYFHEFGHV  
EGKYGHAACFGLQPGCLRQDGSQRQLAIAAMVANFTKPTADAPSLQLQHDEVETYFHEFGHV  
EGKYSHAACFGLQPGCLRQDGSQRQISVAAMVANFTKPTADAPSLQLQHDEVETYFHEFGHV  
EGKYGHAACFGLQPGCLLPNGTRQMAAMVANFTSKPTADAPSLQLQHDEVETYFHEFGHV  
EGKCNHSCVVALQNNALFSGNACQIPVALLIAQFADKGSEAVPLGSDVNNLVHEFGHV

MHQLCSQAEFAMFSGTHVERDFVEAPSQLLENWVWEQEP LLRMSRHRYT --GSVAPRELL  
 MHQLCSQAEFAMFSGTHVERDFVEAPSQLLENWVWEQEP LLRMSRHRYT --GSVAPRELL  
 MHQLCSQAEFAMFSGTHVERDFVEAPSQLLENWVWEAEPLLRMSQHRYT --GSSIPQELL  
 MHQLCSQAEFAMFSGTHVERDFVEAPSQLLENWVWEKEPLMRMSQHRYT --GGEAPEDLL  
 MHQLCSQAEFAMFSGTHVERDFVEAPSQLLENWVWEKEPLMRMSQHRYT --GSEAPQDLL  
 MHQLCAQDTFVFLVFGTGNVERDFVEAPSQLLENWVWERKSLERMSSQHRYT --GKPIPEELL  
 MHQLCAQSDFAMFSGTHVERDFVEAPSQLLENWVWEKEPIQRMSKHRYT --GNPIPEELL  
 VQHICNRSAFARFSGLRVDPDFREIPSQLLENWVCYSEPTTKLISG-YRQDTITKPLVDVCA

EKLIESRQANTGLFNLRQIVLAKVDQALHTQTDADPAEEYARLC-QEILGVPATPGTNMP  
EKLIESRQANTGLFNLRQIVLAKVDQALHTQTDADPAEEYARLC-QEILGVPATPGTNMP  
DKLIKSRQANTGLFNLRQIVLAKVDQALHTQTAADPAKEYARLC-QEILGVPATPGTNMP  
EKLIKSRQANAGLFNLRQIVLAKVDQVLHTQTDVDPAAEYARLC-QEILGVPATPGTNMP  
EKLIKSRQANAGLFNLRQIVLAKVDQVLHTQTDADPAEEYARLC-QEILGVPATPGTNMP  
DKLISRLANTGLNLRQIVLAKVDQVLHTQIVGDPVQEYSKLS-SEILGVPATSGTNMP  
DKLIKSRQANTGLFNLRQIVLAKVDQALHTKTGLDPAEEYARLC-LDILGPISSPGTNMP  
KTLKRWYSPSALKSLQEIYCLFPDQIYSDDDADLLQLIRSLPHKVMIGLPVVBGTNP

ATFGHLAGGYDAQYYGYLWSEVYSMDMFHTRFKQEGVLNSKVGMDYRSCILRPGGSEDAS  
ATFGHLAGGYDAQYYGYLWSEVYSMDMFHTRFKQEGVLNSKVGMDYRSCILRPGGSEDAS  
ATFGHLAGGYDAQYYGYLWSEVYSADMFHTRFKQEGVLSGKVGMDYRSCILRPGGSEDAS  
ATFGHLAGGYDAQYYGYLWSEVYSMDMFHTRFKQEGVLSKVGMDYRTSLRPGGSEDAS  
ATFGHLAGGYDAQYYGYLWSEVYSMDMFHTRFKQEGVLSKVGMDYRSLRPGGSEDAS  
ATFGHLAGGYDAQYYGYLWSEVYSMDMFYTRFKQEGVLSKVGADYRNCILKPGGSLDAT  
ATFGHLAGGYDAQYYGYLWSEVFSMDMFYARFKQEGVLSKVGADYRNCILKPGGSEDAS  
SCFPRAVIGSEATCYRLWSEVYAADIFASKFGD-GHPNLNLAGLQFRDKVLAPGGGKEPM

```
-----
AMLRRLFLGRDPKQDAFLLSKGLQVGGCEPEPQVC
AMLRRLFLGRDPKQDAFLLSKGLQVGGCEPEPQVC
VMLKFLFLGRDPKQDAFLLSKGLQVEGCEPPAC--
TMLKQFLGRDPKQDAFLLSKGLQVEGCEPPAC--
AMLKQFLGRDPKQDAFLLSKGLQVEGSEAPAC--
EMLRNFLGRDPKQDAFLQSKGLDNFNTAPPHAS-
DMLKKFLGREPKQDAFLLSKGLTADVESGTPCAC-
ELLTNFLGREPSTQAFASRTNYSL-----
-----
```

***TXNRD1***

Ac-MKAYQEGR

CLUSTAL O(1.2.1) multiple sequence alignment

|                  |       |                |        |                        |                                                              |
|------------------|-------|----------------|--------|------------------------|--------------------------------------------------------------|
| 00:1 Ac-MKAYQEGR |       |                |        |                        | -----MGC--AEGKAVAAAAPTELQTK--GKNGDGRRRSAKDHHP-GKTLPENPAGF    |
| 01:9606          | 55733 | 0#NP_001087240 | TXNRD1 | Homo_sapiens           | -----                                                        |
| 01:9606          | 55733 | 0#NP_001248374 | TXNRD1 | Homo_sapiens           | -----                                                        |
| 01:9606          | 55733 | 0#NP_001248375 | TXNRD1 | Homo_sapiens           | -----                                                        |
| 01:9606          | 55733 | 0#NP_003321    | TXNRD1 | Homo_sapiens           | -----                                                        |
| 01:9606          | 55733 | 0#NP_877393    | TXNRD1 | Homo_sapiens           | -----                                                        |
| 01:9606          | 55733 | 0#NP_877419    | TXNRD1 | Homo_sapiens           | -----                                                        |
| 01:9606          | 55733 | 0#NP_877420    | TXNRD1 | Homo_sapiens           | -----                                                        |
| 01:9606          | 55733 | NM_001093771   | TXNRD1 | Homo_sapiens           | SSHRALCDMGC--AEGKAVAAAAPTELQTK--GKNGDGRRRSAKDHHP-GKTLPENPAGF |
| 01:9606          | 55733 | NM_001261445   | TXNRD1 | Homo_sapiens           | -----AD-GEAFP-NPGSF                                          |
| 01:9606          | 55733 | NM_001261446   | TXNRD1 | Homo_sapiens           | -----                                                        |
| 01:9606          | 55733 | NM_003330      | TXNRD1 | Homo_sapiens           | -----NQTKPRAQGWEHA-GDGLPAGTTAL                               |
| 01:9606          | 55733 | NM_182729      | TXNRD1 | Homo_sapiens           | -----                                                        |
| 01:9606          | 55733 | NM_182742      | TXNRD1 | Homo_sapiens           | -----                                                        |
| 01:9606          | 55733 | NM_182743      | TXNRD1 | Homo_sapiens           | -----                                                        |
| 02:9598          | 55733 | NM_001122669   | TXNRD1 | Pan_troglodytes        | -----                                                        |
| 03:9544          | 55733 | NM_001256275   | TXNRD1 | Macaca_mulatta         | -----                                                        |
| 04:9913          | 55733 | NM_174625      | TXNRD1 | Bos_taurus             | -----                                                        |
| 05:9615          | 55733 | NM_001122673   | TXNRD1 | Canis_lupus_familiaris | -----MGC--GKSKVR-AGAPPQPEAN--GRRGPGSQSSAKDHFP-CQPLPENPAIG    |
| 06:10116         | 55733 | NM_031614      | Txnrd1 | Rattus_norvegicus      | -----                                                        |
| 07:10090         | 55733 | NM_001042513   | Txnrd1 | Mus_musculus           | -----                                                        |
| 07:10090         | 55733 | NM_001042514   | Txnrd1 | Mus_musculus           | -----                                                        |
| 07:10090         | 55733 | NM_001042523   | Txnrd1 | Mus_musculus           | -----VPC--IEGEALVTM-----                                     |
| 07:10090         | 55733 | NM_015762      | Txnrd1 | Mus_musculus           | -----                                                        |
| 08:9031          | 55733 | NM_001030762   | TXNRD1 | Gallus_gallus          | -----                                                        |
| 09:8364          | 55733 | NM_001256471   | txnrd1 | Xenopus_tropicalis     | --WFQSFTMGNSVKKGKAVFVDQ-TQVKSMLRYKAALEDQSSKSPEIPCKKTNENEDNGW |
| 15:3702          | 55733 | NM_001035679   | GR1    | Arabidopsis_thaliana   | -----                                                        |
| 15:3702          | 55733 | NM_001125216   | GR1    | Arabidopsis_thaliana   | -----                                                        |
| 15:3702          | 55733 | NM_113322      | GR1    | Arabidopsis_thaliana   | -----                                                        |
| 15:3702          | 55733 | NM_180352      | GR1    | Arabidopsis_thaliana   | -----MGDETVDGI-----EAKY                                      |
| 00:1 Ac-MKAYQEGR |       |                |        |                        | -----                                                        |
| 01:9606          | 55733 | 0#NP_001087240 | TXNRD1 | Homo_sapiens           | TSTA---TA---D--SRALLQAYID-----G---HSVVFISRSTCTRCTEVKKLF      |
| 01:9606          | 55733 | 0#NP_001248374 | TXNRD1 | Homo_sapiens           | -----                                                        |
| 01:9606          | 55733 | 0#NP_001248375 | TXNRD1 | Homo_sapiens           | -----                                                        |
| 01:9606          | 55733 | 0#NP_003321    | TXNRD1 | Homo_sapiens           | -----                                                        |
| 01:9606          | 55733 | 0#NP_877393    | TXNRD1 | Homo_sapiens           | -----                                                        |
| 01:9606          | 55733 | 0#NP_877419    | TXNRD1 | Homo_sapiens           | -----                                                        |
| 01:9606          | 55733 | 0#NP_877420    | TXNRD1 | Homo_sapiens           | -----                                                        |
| 01:9606          | 55733 | NM_001093771   | TXNRD1 | Homo_sapiens           | TSTA---TA---D--SRALLQAYID-----G---HSVVFISRSTCTRCTEVKKLF      |
| 01:9606          | 55733 | NM_001261445   | TXNRD1 | Homo_sapiens           | VACA---VS---T--RSHKA-----S---ACHVVGEAGACRL---AVSF            |
| 01:9606          | 55733 | NM_001261446   | TXNRD1 | Homo_sapiens           | -----                                                        |
| 01:9606          | 55733 | NM_003330      | TXNRD1 | Homo_sapiens           | RLGA---AVCVSG--KGRYFKACLS-----RRGG--FSKPRQLRGVCG-----        |
| 01:9606          | 55733 | NM_182729      | TXNRD1 | Homo_sapiens           | -----                                                        |
| 01:9606          | 55733 | NM_182742      | TXNRD1 | Homo_sapiens           | -----                                                        |
| 01:9606          | 55733 | NM_182743      | TXNRD1 | Homo_sapiens           | -----                                                        |
| 02:9598          | 55733 | NM_001122669   | TXNRD1 | Pan_troglodytes        | -----                                                        |
| 03:9544          | 55733 | NM_001256275   | TXNRD1 | Macaca_mulatta         | -----                                                        |
| 04:9913          | 55733 | NM_174625      | TXNRD1 | Bos_taurus             | -----                                                        |
| 05:9615          | 55733 | NM_001122673   | TXNRD1 | Canis_lupus_familiaris | VSRPSGSTSTSLLD--PRARLRAYID-----S---HPVVIVSKSACKRCAEVKKLF     |
| 06:10116         | 55733 | NM_031614      | Txnrd1 | Rattus_norvegicus      | -----CA-----                                                 |
| 07:10090         | 55733 | NM_001042513   | Txnrd1 | Mus_musculus           | -----                                                        |
| 07:10090         | 55733 | NM_001042514   | Txnrd1 | Mus_musculus           | -----                                                        |
| 07:10090         | 55733 | NM_001042523   | Txnrd1 | Mus_musculus           | -----PVDDCWLYFP-----ASRGR-TFVQTVWVAPTCPNCCWFPGF              |
| 07:10090         | 55733 | NM_015762      | Txnrd1 | Mus_musculus           | -----                                                        |
| 08:9031          | 55733 | NM_001030762   | TXNRD1 | Gallus_gallus          | -----                                                        |
| 09:8364          | 55733 | NM_001256471   | txnrd1 | Xenopus_tropicalis     | RTDKN-----KSG--LKIEIEEYI-----C-SSDVVIFSKTSCNSCAKVKDHF        |
| 15:3702          | 55733 | NM_001035679   | GR1    | Arabidopsis_thaliana   | -----                                                        |
| 15:3702          | 55733 | NM_001125216   | GR1    | Arabidopsis_thaliana   | -----                                                        |
| 15:3702          | 55733 | NM_113322      | GR1    | Arabidopsis_thaliana   | -----                                                        |
| 15:3702          | 55733 | NM_180352      | GR1    | Arabidopsis_thaliana   | ISGLSTIMVATIQEAKDRISQIEYIFCSQLFPNFQSKSKAFKVVYSEARLAACDTWKDRE |
| 00:1 Ac-MKAYQEGR |       |                |        |                        | -----                                                        |
| 01:9606          | 55733 | 0#NP_001087240 | TXNRD1 | Homo_sapiens           | KSLCVPYFVLELDQTE-DGRA----LEGTLSEL-----AAETDLPVVVFK           |
| 01:9606          | 55733 | 0#NP_001248374 | TXNRD1 | Homo_sapiens           | -----ME-DGRA----LEGTLSEL-----AAETDLPVVVFK                    |
| 01:9606          | 55733 | 0#NP_001248375 | TXNRD1 | Homo_sapiens           | -----                                                        |
| 01:9606          | 55733 | 0#NP_003321    | TXNRD1 | Homo_sapiens           | -----MSCE-DGRA----LEGTLSEL-----AAETDLPVVVFK                  |
| 01:9606          | 55733 | 0#NP_877393    | TXNRD1 | Homo_sapiens           | -----                                                        |
| 01:9606          | 55733 | 0#NP_877419    | TXNRD1 | Homo_sapiens           | -----                                                        |
| 01:9606          | 55733 | 0#NP_877420    | TXNRD1 | Homo_sapiens           | -----                                                        |
| 01:9606          | 55733 | NM_001093771   | TXNRD1 | Homo_sapiens           | KSLCVPYFVLELDQTE-DGRA----LEGTLSEL-----AAETDLPVVVFK           |
| 01:9606          | 55733 | NM_001261445   | TXNRD1 | Homo_sapiens           | LLVFVETVCRTAEKME-DGRA----LEGTLSEL-----AAETDLPVVVFK           |
| 01:9606          | 55733 | NM_001261446   | TXNRD1 | Homo_sapiens           | -----DGRA----LEGTLSEL-----AAETDLPVVVFK                       |
| 01:9606          | 55733 | NM_003330      | TXNRD1 | Homo_sapiens           | ---FDPVTSQSFMSCE-DGRA----LEGTLSEL-----AAETDLPVVVFK           |
| 01:9606          | 55733 | NM_182729      | TXNRD1 | Homo_sapiens           | -----DGRA----LEGTLSEL-----AAETDLPVVVFK                       |
| 01:9606          | 55733 | NM_182742      | TXNRD1 | Homo_sapiens           | -----A-DGEA----FPNPGSFV-----ACAV                             |
| 01:9606          | 55733 | NM_182743      | TXNRD1 | Homo_sapiens           | -----                                                        |
| 02:9598          | 55733 | NM_001122669   | TXNRD1 | Pan_troglodytes        | -----DGRA----LEGTLSEL-----AAETDLPVVVFK                       |
| 03:9544          | 55733 | NM_001256275   | TXNRD1 | Macaca_mulatta         | -----GVSEQ-TGRL----FQ-----TQASWR                             |
| 04:9913          | 55733 | NM_174625      | TXNRD1 | Bos_taurus             | -----DGLG--LEGALSER-----TS-----KTLVK                         |
| 05:9615          | 55733 | NM_001122673   | TXNRD1 | Canis_lupus_familiaris | ESMSVPYFLELDQAE-DARG----LELALSEL-----TPETDAPVVVFK            |

```

-----SVRPRIHAGG-AGRRRGGARRAGVFILLAHRAAGPCSGAGKRRGRGRRRAGRRR
-----GG--GALQRRGRAERPREA--ASQ----RKV
--PRARGVPEAPPGGRLTAALLCATEGG--GALQRRGRAERPREA--ASQ----RKV
PPVPRPPHVPRVLLRGRGA-VLPASRPS-KTLPSSSQTPCTDPCICPPP-----STP
-----FASVPRPVHAG--GA-----GRR-----HRG
--CFIFYF-----TE-SIQK-----LQGVLCFV-----TABTSQPVGFVE
DQMGITYLTVELDQIENGHK-----LEELLYEQ-----TMETSLSPSVFVK
-----VCIIIM
-----VCIIIM
-----VCIIIM
KSLLDQIEELKV--ENQQIK--SDKEKLAELGK-----TASMPRLR

```

```

-----MKAYQEGR-----
QRKIGGHGPTLKAYQEGRLQKLLKMNGPEDLPKSYDYDLIIIGGSGGLAAAKEAAQYQK
QRKIGGHGPTLKAYQEGRLQKLLKMNGPEDLPKSYDYDLIIIGGSGGLAAAKEAAQYQK

QRKIGGHGPTLKAYQEGRLQKLLKMNGPEDLPKSYDYDLIIIGGSGGLAAAKEAAQYQK
-----MNGPEDLPKSYDYDLIIIGGSGGLAAAKEAAQYQK
-----MNGPEDLPKSYDYDLIIIGGSGGLAAAKEAAQYQK
-----MNGPEDLPKSYDYDLIIIGGSGGLAAAKEAAQYQK
QRKIGGHGPTLKAYQEGRLQKLLKMNGPEDLPKSYDYDLIIIGGSGGLAAAKEAAQYQK
QRKIGGHGPTLKAYQEGRLQKLLKMNGPEDLPKSYDYDLIIIGGSGGLAAAKEAAQYQK
QRKIGGHGPTL-----KEAAQYQK
QRKIGGHGPTLKAYQEGRLQKLLKMNGPEDLPKSYDYDLIIIGGSGGLAAAKEAAQYQK
QRKIGGHGPTLKAYQEGRLQKLLKMNGPEDLPKSYDYDLIIIGGSGGLAAAKEAAQYQK
STRSHKASACHVAYQEGRLQKLLKMNGPEDLPKSYDYDLIIIGGSGGLAAAKEAAQYQK
-----CLHHSQILAYQEGRLQKLLKMNGPEDLPKSYDYDLIIIGGSGGLAAAKEAAQYQK
QRKIGGHGPTLKAYQEGRLQKLLKMNGPEDLPESYDYDLIIIGGSGGLAAAKEAAQYQK
VWFRPGHTKRQAHYQEGRLQKLLKMNGPEDLPESYDYDLIIIGGSGGLAAAKEAAQYQK
RRKIGHHGPTLKASQENRLQNPVKMNGSKDLPEPYDYDLIIIGGSGGLAAAKEAAKYDK
RRNIGGHGPTLKAYQEGRLQNLNLMNGSEDLPEVYDYDLIIIGGSGGLAAAKEAARYNK
GRAEGGHGPALKPNKKLLRLSTMNSDKAPKSYDFDLIIIGGSGGLAAAKEAAKFDK
RPAEGGHGPALKPNKKGQLQKLPTMNGSKDPPGSYDFDLIIIGGSGGLAAAKEAAKFDK
RPAEGGHGPALKPNKKGQLQKLPTMNGSKDPPGSYDFDLIIIGGSGGLAAAKEAAKFDK
DSRQKNTQSPALPNKKGQLQKLPTMNGSKDPPGSYDFDLIIIGGSGGLAAAKEAAKFDK
ARRAGGFTFLVHPNKKGQLQKLPTMNGSKDPPGSYDFDLIIIGGSGGLAAAKEAAKFDK
EKQIEGHEKTLKAHKEDKPQKVLEMNHGTAVPHSYDYDLIVIGGSGGLAAAKEAAKYEK
EKHIGNYDDLILKSKENLFQKLETKEDNPRDSYDYDLIVIGGSGGLAAASKEAANYQK
AR-----KMLVDG-----EIDKVADEANATHYDFDLFVIGAGSGVRAARFSANHGA
AR-----KMLVDG-----EIDKVADEANATHYDFDLFVIGAGSGVRAARFSANHGA
AR-----KMLVDG-----EIDKVADEANATHYDFDLFVIGAGSGVRAARFSANHGA
-----TSLQGYIDHLKKMKM-----SRKSMVDA-----RDLYRRLVELLQV-----LSEDDI

```

KVMVLDFV--TPTPLGTRWGLGGTCVNVGCI PKKLMHQAALLGQALQDSRNYGWKVEETVK  
KVMVLDFV--TPTPLGTRWGLGGTCVNVGCI PKKLMHQAALLGQALQDSRNYGWKVEETVK  
--MVLDFV--TPTPLGTRWGLGGTCVNVGCI PKKLMHQAALLGQALQDSRNYGWKVEETVK  
KVMVLDFV--TPTPLGTRWGLGGTCVNVGCI PKKLMHQAALLGQALQDSRNYGWKVEETVK  
KIMVLDFV--TPTPRGTRWGLGGTCVNVGCI PKKLMHQAALLGQALQDSRNYGWSTEEYTK  
KVMVLDFV--TPTPLGTRWGLGGTCVNVGCI PKKLMHQAALLGQALKDSRNYGWKLDETVK  
KVLVLDFV--TPTPLGTRWGLGGTCVNVGCI PKKLMHQAALLGQALKDSRNYGWKVEDTVK  
KVLVLDFV--TPTPLGTRWGLGGTCVNVGCI PKKLMHQAALLGQALKDSRNYGWKVEDTVK  
KVLVLDFV--TPTPLGTRWGLGGTCVNVGCI PKKLMHQAALLGQALKDSRNYGWKVEDTVK  
KVLVLDFV--TPTPLGTRWGLGGTCVNVGCI PKKLMHQAALLGQALKDSRNYGWKVEDTVK  
KVLVLDFV--TPTPLGNSWGLGGTCVNVGCI PKKLMHQAALLGQALQDSRKFGWPTEEVK  
KVLVLDFV--TPTPLGTWKWGLGGTCVNVGCI PKKLMHQAALLRQALKDSQKYWGIEDNIKV  
KVGICELPFHPISSEEIGGVGGTCVIRGCVPKKILVYGATYGGEBDAKNYAGWEINEKVD  
KVGICELPFHPISSEEIGGVGGTCVIRGCVPKKILVYGATYGGEBDAKNYAGWEINEKVD  
KVGICELPFHPISSEEIGGVGGTCVIRGCVPKKILVYGATYGGEBDAKNYAGWEINEKVD  
NMIVSEVK--SLMKMTBFL-QEELS KSKTLVTENLLKLEYLSTEAADGERKLSSE-EBK

[illegible]



|          |       |                |        |                        |
|----------|-------|----------------|--------|------------------------|
| 01:9606  | 55733 | 0#NP_001087240 | TXNRD1 | Homo_sapiens           |
| 01:9606  | 55733 | 0#NP_001248374 | TXNRD1 | Homo_sapiens           |
| 01:9606  | 55733 | 0#NP_001248375 | TXNRD1 | Homo_sapiens           |
| 01:9606  | 55733 | 0#NP_003321    | TXNRD1 | Homo_sapiens           |
| 01:9606  | 55733 | 0#NP_877393    | TXNRD1 | Homo_sapiens           |
| 01:9606  | 55733 | 0#NP_877419    | TXNRD1 | Homo_sapiens           |
| 01:9606  | 55733 | 0#NP_877420    | TXNRD1 | Homo_sapiens           |
| 01:9606  | 55733 | NM_001093771   | TXNRD1 | Homo_sapiens           |
| 01:9606  | 55733 | NM_001261445   | TXNRD1 | Homo_sapiens           |
| 01:9606  | 55733 | NM_001261446   | TXNRD1 | Homo_sapiens           |
| 01:9606  | 55733 | NM_003330      | TXNRD1 | Homo_sapiens           |
| 01:9606  | 55733 | NM_182729      | TXNRD1 | Homo_sapiens           |
| 01:9606  | 55733 | NM_182742      | TXNRD1 | Homo_sapiens           |
| 01:9606  | 55733 | NM_182743      | TXNRD1 | Homo_sapiens           |
| 02:9598  | 55733 | NM_001122669   | TXNRD1 | Pan_troglodytes        |
| 03:9544  | 55733 | NM_001256275   | TXNRD1 | Macaca_mulatta         |
| 04:9913  | 55733 | NM_174625      | TXNRD1 | Bos_taurus             |
| 05:9615  | 55733 | NM_001122673   | TXNRD1 | Canis_lupus_familiaris |
| 06:10116 | 55733 | NM_031614      | Txnrd1 | Rattus_norvegicus      |
| 07:10090 | 55733 | NM_001042513   | Txnrd1 | Mus_musculus           |
| 07:10090 | 55733 | NM_001042514   | Txnrd1 | Mus_musculus           |
| 07:10090 | 55733 | NM_001042523   | Txnrd1 | Mus_musculus           |
| 07:10090 | 55733 | NM_015762      | Txnrd1 | Mus_musculus           |
| 08:9031  | 55733 | NM_001030762   | TXNRD1 | Gallus_gallus          |
| 09:8364  | 55733 | NM_001256471   | txnrd1 | Xenopus_tropicalis     |
| 15:3702  | 55733 | NM_001035679   | GR1    | Arabidopsis_thaliana   |
| 15:3702  | 55733 | NM_001125216   | GR1    | Arabidopsis_thaliana   |
| 15:3702  | 55733 | NM_113322      | GR1    | Arabidopsis_thaliana   |
| 15:3702  | 55733 | NM_180352      | GR1    | Arabidopsis_thaliana   |

[illegible]

|          |       |                |        |                        |
|----------|-------|----------------|--------|------------------------|
| 01:9606  | 55733 | 0#NP_001087240 | TXNRD1 | Homo_sapiens           |
| 01:9606  | 55733 | 0#NP_001248374 | TXNRD1 | Homo_sapiens           |
| 01:9606  | 55733 | 0#NP_001248375 | TXNRD1 | Homo_sapiens           |
| 01:9606  | 55733 | 0#NP_003321    | TXNRD1 | Homo_sapiens           |
| 01:9606  | 55733 | 0#NP_877393    | TXNRD1 | Homo_sapiens           |
| 01:9606  | 55733 | 0#NP_877419    | TXNRD1 | Homo_sapiens           |
| 01:9606  | 55733 | 0#NP_877420    | TXNRD1 | Homo_sapiens           |
| 01:9606  | 55733 | NM_001093771   | TXNRD1 | Homo_sapiens           |
| 01:9606  | 55733 | NM_001261445   | TXNRD1 | Homo_sapiens           |
| 01:9606  | 55733 | NM_001261446   | TXNRD1 | Homo_sapiens           |
| 01:9606  | 55733 | NM_003330      | TXNRD1 | Homo_sapiens           |
| 01:9606  | 55733 | NM_182729      | TXNRD1 | Homo_sapiens           |
| 01:9606  | 55733 | NM_182742      | TXNRD1 | Homo_sapiens           |
| 01:9606  | 55733 | NM_182743      | TXNRD1 | Homo_sapiens           |
| 02:9598  | 55733 | NM_001122669   | TXNRD1 | Pan_troglodytes        |
| 03:9544  | 55733 | NM_001256275   | TXNRD1 | Macaca_mulatta         |
| 04:9913  | 55733 | NM_174625      | TXNRD1 | Bos_taurus             |
| 05:9615  | 55733 | NM_001122673   | TXNRD1 | Canis_lupus_familiaris |
| 06:10116 | 55733 | NM_031614      | Txnrd1 | Rattus_norvegicus      |
| 07:10090 | 55733 | NM_001042513   | Txnrd1 | Mus_musculus           |
| 07:10090 | 55733 | NM_001042514   | Txnrd1 | Mus_musculus           |
| 07:10090 | 55733 | NM_001042523   | Txnrd1 | Mus_musculus           |
| 07:10090 | 55733 | NM_015762      | Txnrd1 | Mus_musculus           |
| 08:9031  | 55733 | NM_001030762   | TXNRD1 | Gallus_gallus          |
| 09:8364  | 55733 | NM_001256471   | txnrd1 | Xenopus_tropicalis     |
| 15:3702  | 55733 | NM_001035679   | GR1    | Arabidopsis_thaliana   |
| 15:3702  | 55733 | NM_001125216   | GR1    | Arabidopsis_thaliana   |
| 15:3702  | 55733 | NM_113322      | GR1    | Arabidopsis_thaliana   |
| 15:3702  | 55733 | NM_180352      | GR1    | Arabidopsis_thaliana   |

[illegible]

```
01:19606|55733|0#NP_001087240|TXNRD1|Homo_sapiens
01:19606|55733|0#NP_001248374|TXNRD1|Homo_sapiens
01:19606|55733|0#NP_001248375|TXNRD1|Homo_sapiens
01:19606|55733|0#NP_003321|TXNRD1|Homo_sapiens
01:19606|55733|0#NP_877393|TXNRD1|Homo_sapiens
01:19606|55733|0#NP_877419|TXNRD1|Homo_sapiens
01:19606|55733|0#NP_877420|TXNRD1|Homo_sapiens
01:19606|55733|NM_001093771|TXNRD1|Homo_sapiens
01:19606|55733|NM_001261445|TXNRD1|Homo_sapiens
01:19606|55733|NM_001261446|TXNRD1|Homo_sapiens
01:19606|55733|NM_003330|TXNRD1|Homo_sapiens
01:19606|55733|NM_182729|TXNRD1|Homo_sapiens
01:19606|55733|NM_182742|TXNRD1|Homo_sapiens
01:19606|55733|NM_182743|TXNRD1|Homo_sapiens
02:9598|55733|NM_001122669|TXNRD1|Pan_troglodytes
03:9544|55733|NM_001256275|TXNRD1|Macaca_mulatta
04:9913|55733|NM_174625|TXNRD1|Bos_taurus
05:9615|55733|NM_001122673|TXNRD1|Canis_lupus_familiaris
06:10116|55733|NM_031614|Txnrd1|Rattus_norvegicus
07:10090|55733|NM_001042513|Txnrd1|Mus_musculus
```

[illegible]

PVAIQAGRLLAQRLYGGSNVKCDYDNVP-----TTVF---TPLEYG  
PVAIQAGRLLAQRLYGGSNVKCDYDNVP-----TTVF---TPLEYG  
PVAIQAGRLLAQRLYGGSNVKCDYDNVP-----TTVF---TPLEYG  
PVAIQAGRLLVQRLYAGSTLKC DYVNVP-----TTVF---TPLEYG  
PVAIQAGRLLARRLYGDS TVKCDYVNVP-----TTVF---TPLEYG  
PVALMEATCFANTAFGGKPTKAEYSNVA-----CAVF---CIPPLA  
PVALMEATCFANTAFGGKPTKAEYSNVA-----CAVF---CIPPLA  
PVALMEATCFANTAFGGKPTKAEYSNVA-----CAVF---CIPPLA  
PKPSPS----RQRIQIAETSSKSPKHVESVRKKAERENLKGIECKQCKKFYDAVHPENEG

```
-----ACGLSEEKAVEKFGEENIEVYHSFYWPLEWTIPSRDNNKCYAKIICNTKDNERV
-----SCGLSEEKAVEKFGEENIEVYHSFYWPLEWTIPSRDNNKCYAKVVCNIKDNERV
-----ACGLSEERAVEKFGEENIEVYHSFYWPLEWTIPSRDNNKCYAKVVCNIKDNERV
-----CGLSEEKAVEKFGEENIEVYHSFYWPLEWTPVRDNNKCYAKVVCNLKDNERV
-----CCGLSEEKAVEKFGEENIEVYHSFFWPLEWTVPSRDNNKCYAKIICNLKDDERV
-----CCGLSEEKAVEKFGEENIEVYHSFFWPLEWTVPSRDNNKCYAKIICNLKDDERV
-----CCGLSEEKAVEKFGEENIEVYHSFFWPLEWTVPSRDNNKCYAKIICNLKDDERV
-----CCGLSEEKAVEKFGEENIEVYHSFFWPLEWTVPSRDNNKCYAKIICNLQDNQRV
-----ACGLSEEHAIHQYEENIEVYHSFYWPLEWTVPARDNNKCYAKIICNLKDKGRV
-----VVGLSEEEAVEQAT-GDILVFTSGFNPMKNTISGRQEKTLMK-LIVD-EKSDKV
-----VVGLSEEEAVEQAT-GDILVFTSGFNPMKNTISGRQEKTLMK-LIVD-EKSDKV
-----VVGLSEEEAVEQAT-GDILVFTSGFNPMKNTISGRQEKTLMK-LIVD-EKSDKV
NGNKSRLCEHHGVSRHRYR-YAPMPTPEGWNIGFESM-----
```

[illegible]

GCUG  
GCUG  
GCUG  
GCUG  
GCUG  
GCUG  
GCUG  
GC--  
GC--  
GC--

|          |       |              |        |                        |      |
|----------|-------|--------------|--------|------------------------|------|
| 01:9606  | 55733 | NM_003330    | TXNRD1 | Homo_sapiens           | GC-- |
| 01:9606  | 55733 | NM_182729    | TXNRD1 | Homo_sapiens           | GC-- |
| 01:9606  | 55733 | NM_182742    | TXNRD1 | Homo_sapiens           | GC-- |
| 01:9606  | 55733 | NM_182743    | TXNRD1 | Homo_sapiens           | GC-- |
| 02:9598  | 55733 | NM_001122669 | TXNRD1 | Pan_troglodytes        | GC-- |
| 03:9544  | 55733 | NM_001256275 | TXNRD1 | Macaca_mulatta         | GC-- |
| 04:9913  | 55733 | NM_174625    | TXNRD1 | Bos_taurus             | GC-- |
| 05:9615  | 55733 | NM_001122673 | TXNRD1 | Canis_lupus_familiaris | GC-- |
| 06:10116 | 55733 | NM_031614    | Txnrd1 | Rattus_norvegicus      | GC-- |
| 07:10090 | 55733 | NM_001042513 | Txnrd1 | Mus_musculus           | GC-- |
| 07:10090 | 55733 | NM_001042514 | Txnrd1 | Mus_musculus           | GC-- |
| 07:10090 | 55733 | NM_001042523 | Txnrd1 | Mus_musculus           | GC-- |
| 07:10090 | 55733 | NM_015762    | Txnrd1 | Mus_musculus           | GC-- |
| 08:9031  | 55733 | NM_001030762 | TXNRD1 | Gallus_gallus          | GC-- |
| 09:8364  | 55733 | NM_001256471 | txnrd1 | Xenopus_tropicalis     | GC-- |
| 15:3702  | 55733 | NM_001035679 | GR1    | Arabidopsis_thaliana   | KTNL |
| 15:3702  | 55733 | NM_001125216 | GR1    | Arabidopsis_thaliana   | KTNL |
| 15:3702  | 55733 | NM_113322    | GR1    | Arabidopsis_thaliana   | KTNL |
| 15:3702  | 55733 | NM_180352    | GR1    | Arabidopsis_thaliana   | ---- |

# *SLC4A4*

Ac-AAAAPHSAAKLEER

Ac-AAKAAAAAAVAVAAAAPHSAAKLEER

Ac-AVAAAAPHSAAKLEER

```

00:1 | Ac-AAAAPHSAAKLEER
00:2 | Ac-AAKAAAAAAVAVAAAAAPHSAAKLEER
00:3 | Ac-AVAAAAPHSAAKLEER
01:9606 | 55776 | 0#NP_001091954 | SLC4A4 | Homo_sapiens
01:9606 | 55776 | 0#NP_001128214 | SLC4A4 | Homo_sapiens
01:9606 | 55776 | 0#NP_003750 | SLC4A4 | Homo_sapiens
01:9606 | 55776 | NM_001098484 | SLC4A4 | Homo_sapiens
01:9606 | 55776 | NM_001134742 | SLC4A4 | Homo_sapiens
01:9606 | 55776 | NM_003759 | SLC4A4 | Homo_sapiens
04:9913 | 55776 | NM_174605 | SLC4A4 | Bos_taurus
06:10116 | 55776 | NM_053424 | Slc4a4 | Rattus_norvegicus
07:10090 | 55776 | NM_001136260 | Slc4a4 | Mus_musculus
07:10090 | 55776 | NM_001197147 | Slc4a4 | Mus_musculus
07:10090 | 55776 | NM_018760 | Slc4a4 | Mus_musculus
10:7955 | 55776 | NM_001034984 | slc4a4a | Danio_rerio
15:3702 | 55776 | NM_101415 | BOR4 | Arabidopsis_thaliana
15:3702 | 55776 | NM_106139 | BOR5 | Arabidopsis_thaliana

```

```

-----AAAAPHSAAKLEER-----
-----AAKAAAAAAVAVAAAAPHSAAKLEER-----
-----AVAAAAPHSAAKLEER-----
-----MEDEAVLDRGASFLKHVCDEE
-----MEDEAVLDRGASFLKHVCDEE-----MSTE
AAAAA VAAKAAAAAAVAVAAAAPHSAAKLEERRKPDPRRMEDEAVLDRGASFLKHVCDEE
AAAAA VAAKAAAAAAVAVAAAAPHSAAKLEERRKPDPRRMEDEAVLDRGASFLKHVCDEE
-----IGDLGG--LAGKMSTE
-----MEDEAVLDRGASFLKHVCDEE
-----SHSVAKLEERRKPDPRRMEDEAVLDRGASFLKHVCDEE
-----AAAAASHSVAKLEERRKPDPRRMEDEAVLDRGASFLKHVCDEE
-----AAAASHSVAKLEERRKPDPRRMEDEAVLDRGASFLKHVCDEE
-----AAAASHSVAKLEERRKPDPRRMEDEAVLDRGASFLKHVCDEE
-----LPQMSAGKRVEDEAVLDRGASLLKPLCDQE
-----
-----

```

```
-----
EVEGHHTIYIGVHVPKSYRRRRRRHKRKTGHKEKKEKERISENYSDKSDIENADESSSSIL
EVEGHHTIYIGVHVPKSYRRRRRRHKRKTGHKEKKEKERISENYSDKSDIENADESSSSIL
NVEGK-----PSN-----LGERG--RARSS-TFL---RVQPMPFNHSIF
EVEGHHTIYIGVHVPKSYRRRRRRHKRKTGHKEKKEKERISENYSDKSDIENADESSSSIL
EVEGHHTIYIGVHVPKSYRRRRRRHKRKTGHKEKKEKERISENYSDKSDIENADESSSSIL
NVEGK-----PSN-----LGERG--RARSS-TFL---RVQPMPFNHSIF
EVEGHHTIYIGVHVPKSYRRRRRRHKRKTGHREKKEKERISENYSDKSDVENADESSSSIL
EVEGHHTIYIGVHVPKSYRRRRRRHKRKGAGHEKKEKERISENYSDKSDVENADESSSSIL
EVEGHHTIYIGVHVPKSYRRRRRRHKRKGAGHEKKEKERISENYSDKSDVENADESSSSIL
EVEGHHTIYIGVHVPKSYRRRRRRHKRKGAGHEKKEKERISENYSDKSDVENADESSSSIL
EVEGHHTIYIGVHVPKSYRRRRRRHKRKGAGHEKKEKERISENYSDKSDVENADESSSSIL
EVEGHHTIYIGVHVPKSYRRRRRRRRRTSHKDRK--EKVSENTSDRSDAENNEEASNSIL
-----
```

[illegible]

```

-----
GERWSKPHVATLSLHSLFELRTCMEKGSIMLDREASSLPQLVEMIVDHIQIETGLLKPELK
GERWSKPHVATLSLHSLFELRTCIEKGTIMLDLEASTLPQGVVEMITDSQIESGLLKADLK
-----

```

[illegible]



[illegible][illegible][illegible]

-----LLGLIFTFGLLYTALKSRKRSWRYGTGWRSFIADYAVPLM-----  
-----LLGLIFTVGLVLTALKSRKRSWRYGTGCRSFVADYGVPLM-----

[illegible]

[illegible][illegible]

```

-----
-----
AHIDSLKM-----
MHTKSLAVLKRQLIRRKMVKTAKESIRKRETSSQVYENMQEVFIEMDKSPLAQTPDSVII
MHTKSLAVFKRQLMRRKMVMTAKESIRQKATSSQVYEDMEQVFIEMDKSPLAETHHTLIN

```

[illegible][illegible]

[illegible]

```

DV---IPEKDKKKKDEKKK-KKKKGS LSDSNDDSDCPYSEKVP SIKIPMDIMEQQPFL
DV---IPEKDKKKKDEKKK-KKKKGS LSDSNDD EKHQHS LNATH---HADKIPFL
DV---IPEKDKKKKDEKKK-KKKKGS LSDSNDDSDCPYSEKVP SIKIPMDIMEQQPFL
DV---IPEKDKKKKDEKKK-KKKKGS LSDSNDDSDCPYSEKVP SIKIPMDIMEQQPFL
DV---IPEKDKKKKDEKKK-KKKKGS LSDSNDD EKHQHS LNATH---HADKIPFL
DV---IPEKDKKKKDEKKK-KKKKGS LSDSNDDSDCPYSEKVP SIKIPMDIMEQQPFL
DV---IPEKDKKKKDEKKK-KKKKGS VDSNDDSDCPYSEKVP SIKIPMDIMEQQPFL
DV---IPEKDKKKKDEKKK-KKKKGS LSDSNDDSDCPYSEKVP SIKIPMDITEQQPFL
DV---IPEKDKKKKDEKKK-KKKKGS LSDSNDD EKHQHS LNATH---HADKIPFL
DV---IPEKDKKKKDEKKK-KKKKGS LSDSNDDSDCPYSEKVP SIKIPMDIMEQQPFL
DV---IPEKDKKKKDEKKK-KKKKGS LSDSNDDSDCPYSEKVP SIKIPMDIMEQQPFL
DV---IPEKDKKKKDEKKK KKKKQGS IDSMDSDYPYNENVP SIKIPMDMMEQE PFL
AAEYEEIPGTPRNPRLP LSF S RNSDSRGVQEGDAE ILDEL TTSR -GELKV----RTLNLN
AAEYEEIPGTPRNPRLP LSF S RNS SARGVQECDAE ILDEL TTSR -GELKV----RTLGLN

```

```

-----
-----
SDSKPSDRERSP-----TFLEHRTSC---
QSLGMPSPRPRTPVKVVPQIRIELEPEDNDYFWRSKGTETTL
SDSKPSDRERSP-----TFLEHRTSC---
SDSKPSDRERSP-----TFLEHRTSC---
QSLGMPSPRPRTPVKVVPQIRIELEPEDNDYFWRSKGTETTL
SDSKPSDRERSP-----TFLEHRTSC---
SDSKPSDRERSP-----TFLEHRTSC---
SDNKPLDRERS-----TFLEHRTSC---
ESLGLPSRPRTPVKVVPQIRIEREPEDNDYLWRSKGTETTL
SDNKPLDRERS-----TFLEHRTSC---
SDNKPLDRERS-----TFLEHRTSC---
GDKASDREK-SA-----SILDYSSC---
EDKGNG-----IYPKEVKVAGDGMST-----TRE---
EDKGHQ-----IYPKEIVEVGDDMS-----SRE---

```

*PPP2R5A*

Ac-AGGEEKLGGVPGPEGR

-----  
PTLEASWPHIQLVYEFFRLFLESDFQPSIAKRYIDQKFVQQLLELFDSEDPREDFLKT  
PTLEASWPHIQLVYEFFRLFLESDFQPSIAKRYIDQKFVQQLLELFDSEDPREDFLKT

```

-----
EEREELWKKLEELKLLKKALEKQ-NSAYNMHSILSNTS-----AE---
EEREELWKKLEELKLLKKALEKQ-NSAYNMHSILSNTS-----AE---
EEREELWKKLEELKLLKKALEKQ-NSAYNMHSILSNTS-----AE---
EEREELWKKLEELKLLKKALEKQ-NSAYNMHSILSNTS-----AE---
EEREELWKKLEELKLLKKALEKQ-NSAYNMHSILSNTS-----AE---
EEREELWKKLEELKLLKKALEKQ-NSAYNMHSILSNTS-----AE---
EEREELWKKLEELKLLKKALEKQ-NSAYNMHSILSNTN-----DG---
EEREELWKKLEELKLLKKALEKQ-NNAYNMHSILSNTS-----AQ---
-----

```

|          |  |       |  |              |  |           |  |                      |                                                 |
|----------|--|-------|--|--------------|--|-----------|--|----------------------|-------------------------------------------------|
| 07:10090 |  | 55961 |  | NM_144880    |  | Ppp2r5a   |  | Mus_musculus         | EREELWKKLEELQLKKALEKQ-NNAYNMHSIRSSTS-----AK---- |
| 09:8364  |  | 55961 |  | NM_001078689 |  | ppp2r5a   |  | Xenopus_tropicalis   | EREELWRRLDLDDLKKTLDKQNPALCVQNIQNNAS-----AK----  |
| 15:3702  |  | 55961 |  | NM_113060    |  | AT3G21650 |  | Arabidopsis_thaliana | KRERTWQRLEDLATSKTVVTNEAV--LVPRFVSSVNLTTSSSESTGS |
| 15:3702  |  | 55961 |  | NM_117630    |  | ATB'      |  |                      | KREATWKLEELAASKS-VSNEAV--LVPRFSSSVTLATGKTSGS--  |
| 15:3702  |  | 55961 |  | NM_179059    |  | ATB'      |  |                      | KREATWKLEELAASKS-VSNEAV--LVPRFSSSVTLATGKTSGS--  |

*NARS*

Ac-ASVLQSVSLEVTR

CLUSTAL O(1.2.1) multiple sequence alignment

|                                                             |                                                                   |
|-------------------------------------------------------------|-------------------------------------------------------------------|
| 00:1 Ac-ASVLQSVSLEVTR                                       | -----ASVLQSVSLEVTR-----                                           |
| 01:9606 68404 0#NP_004530 NARS Homo_sapiens                 | -----MVLAELYVSDREGSDATGDGTKE                                      |
| 01:9606 68404 NM_004539 NARS Homo_sapiens                   | CNAGI---AETAGARWSHKTASVLQSVSLEVTRATAGMVLAELYVSDREGSDATGDGTKE      |
| 02:9598 68404 NM_001246373 NARS Pan_troglodytes             | -----TAGARWSHKTASVLQSVSLEVTRATAGMVLAELYVSDREGSDATGDGTKE           |
| 04:9913 68404 NM_001046572 NARS Bos_taurus                  | -DDAIFVLRRLPARSAGRLGGCVLAAMSLEVVRAAAGMVLAELYVSDREGNDVTGDGTKE      |
| 06:10116 68404 NM_001025635 Nars Rattus_norvegicus          | -----AGGSGAVSMSSEVIRGTADMVL-ELYVSDREGNDATGDGTKE                   |
| 06:10116 68404 NM_001142949 Nars Rattus_norvegicus          | -----AGGSGAVSMSSEVIRGTADMVLAELYVSDREGNDATGDGTKE                   |
| 07:10090 68404 NM_001142950 Nars Mus_musculus               | -----AGGGGAVSMSSEVIRGTAEMLAELYVSDREGNDATGDGTKE                    |
| 07:10090 68404 NM_027350 Nars Mus_musculus                  | -----AGGGGAVSMSSEVIRGTAEML-ELYVSDREGNDATGDGTKE                    |
| 08:9031 68404 NM_001031400 NARS Gallus_gallus               | -----GHFRAAAMAGEVIGRTAALALEELYVSEREGSDSTGDGTQK                    |
| 12:7227 68404 NM_001273632 Aats-asn Drosophila_melanogaster | -----TLSHKASKMPADQLAELTLGAIFTSEKKGSDESGDSES                       |
| 12:7227 68404 NM_136104 Aats-asn Drosophila_melanogaster    | -----TLSHKASKMPADQLAELTLGAIFTSEKKGSDESGDSES                       |
| 13:6239 68404 NM_001026234 nars-1 Caenorhabditis_elegans    | -----MSKLYIDTDAGSDQ-HPGTEA                                        |
| 00:1 Ac-ASVLQSVSLEVTR                                       | -----                                                             |
| 01:9606 68404 0#NP_004530 NARS Homo_sapiens                 | KPFKTLGLKALMTVGKEPFPTIYVDSQKEN--ERWNVISKSQKLNKIKMMWHREQMKSERE     |
| 01:9606 68404 NM_004539 NARS Homo_sapiens                   | KPFKTLGLKALMTVGKEPFPTIYVDSQKEN--ERWNVISKSQKLNKIKMMWHREQMKSERE     |
| 02:9598 68404 NM_001246373 NARS Pan_troglodytes             | KPFKTLGLKALMTVGKEPFPTIYVDSQKEN--ERWNVISKSQKLNKIKMMWHREQMKNESRE    |
| 04:9913 68404 NM_001046572 NARS Bos_taurus                  | KPFKTLGLKALMTVGKEPFPTIYVDSQKEN--ERWDVVISKSQMKNIKKMMWHREQMKSERE    |
| 06:10116 68404 NM_001025635 Nars Rattus_norvegicus          | KPFKTLGLKALMTVGKEPFPTIYVDSQKEN--ERWDVVISKSQMKNIKKMMWHREQMKSERE    |
| 06:10116 68404 NM_001142949 Nars Rattus_norvegicus          | KPFKTLGLKALMTVGKEPFPTIYVDSQKEN--ERWDVVISKSQMKNIKKMMWHREQMKSERE    |
| 07:10090 68404 NM_001142950 Nars Mus_musculus               | KPFKTLGLKALMTVGKEPFPTIYVDSQKEN--ERWDVVISKSQMKNIKKMMWHREQMKNDSRE   |
| 07:10090 68404 NM_027350 Nars Mus_musculus                  | KPFKTLGLKALMTVGKEPFPTIYVDSQKEN--ERWDVVISKSQMKNIKKMMWHREQMKNDSRE   |
| 08:9031 68404 NM_001031400 NARS Gallus_gallus               | KPFKTVLKLMTAGKEPFPTIYVDSQKEN--ERWALISKSQMKNVKLLWHREQMKNNAKE       |
| 12:7227 68404 NM_001273632 Aats-asn Drosophila_melanogaster | KPFKTLQAMRHAGKEPFPTIYVDTKDPNAAEPYEPAAKSQKLLKQLFVRESHKNAADKL       |
| 12:7227 68404 NM_136104 Aats-asn Drosophila_melanogaster    | KPFKTLQAMRHAGKEPFPTIYVDTKDPNAAEPYEPAAKSQKLLKQLFVRESHKNAADKL       |
| 13:6239 68404 NM_001026234 nars-1 Caenorhabditis_elegans    | QPLATLVQAMLISKNS---GEFLMKKKSEEGESWEPAAKAAIKKAVKKYEAEVKKLEKAG      |
| 00:1 Ac-ASVLQSVSLEVTR                                       | -----                                                             |
| 01:9606 68404 0#NP_004530 NARS Homo_sapiens                 | KKEAEDSLRREKNLEEAKKITIKNDPSLPEPKCVKIGALEGYRGQRVKVFGWVHRLRRQG      |
| 01:9606 68404 NM_004539 NARS Homo_sapiens                   | KKEAEDSLRREKNLEEAKKITIKNDPSLPEPKCVKIGALEGYRGQRVKVFGWVHRLRRQG      |
| 02:9598 68404 NM_001246373 NARS Pan_troglodytes             | KKEAEDSLRREKNLEEAKKITIKNDPSLPEPKCVKIGALEGYRGQRVKVFGWVHRLRRQG      |
| 04:9913 68404 NM_001046572 NARS Bos_taurus                  | KKEAEDNLRREKNLEEAKKITIKNDPSLPEPKCVKIRELKGYRGQRKIVFGWVHRLRRQG      |
| 06:10116 68404 NM_001025635 Nars Rattus_norvegicus          | KKEAEDNLRREKNLEEAKKIIKNDPSLPEPACVKISALEGYRGQRVKVFGWVHRLRRQG       |
| 06:10116 68404 NM_001142949 Nars Rattus_norvegicus          | KKEAEDNLRREKNLEEAKKIIKNDPSLPEPACVKISALEGYRGQRVKVFGWVHRLRRQG       |
| 07:10090 68404 NM_001142950 Nars Mus_musculus               | KKEAEDNLRREKNLEEAKKIIKNDPSLPEPACVKISALEGYRGQRVKVFGWVHRLRRQG       |
| 07:10090 68404 NM_027350 Nars Mus_musculus                  | KKEAEDNLRREKNLEEAKKIIKNDPSLPEPACVKISALEGYRGQRVKVFGWVHRLRRQG       |
| 08:9031 68404 NM_001031400 NARS Gallus_gallus               | KKEAEDLLRREKNLEEAKKIIKNDPSLPEPKCVKIGALGAYRGQRVKIFGWVHRLRRQG       |
| 12:7227 68404 NM_001273632 Aats-asn Drosophila_melanogaster | QREAEADAERKQONLEDARKVKISEDPSLPVARKIRIYEGETANRDSRVKVVYVFGWVHRLRRQG |
| 12:7227 68404 NM_136104 Aats-asn Drosophila_melanogaster    | QREAEADAERKQONLEDARKVKISEDPSLPVARKIRIYEGETANRDSRVKVVYVFGWVHRLRRQG |
| 13:6239 68404 NM_001026234 nars-1 Caenorhabditis_elegans    | CREKEAEAEQAHALEEAKKITFSLDKSLPEAKVIKIGESVQHRDQRVSIKAVVHRLRRQG      |
| 00:1 Ac-ASVLQSVSLEVTR                                       | -----                                                             |
| 01:9606 68404 0#NP_004530 NARS Homo_sapiens                 | KNLMFLVLRLDGTGYLQCVLADELQCYNQVLLSTESSVAVYGMNLNLTGPKGQAPGGHEL      |
| 01:9606 68404 NM_004539 NARS Homo_sapiens                   | KNLMFLVLRLDGTGYLQCVLADELQCYNQVLLSTESSVAVYGMNLNLTGPKGQAPGGHEL      |
| 02:9598 68404 NM_001246373 NARS Pan_troglodytes             | KNLMFLVLRLDGTGYLQCVLADELQCYNQVLLSTESSVAVYGMNLNLTGPKGQAPGGHEL      |
| 04:9913 68404 NM_001046572 NARS Bos_taurus                  | KNLMFLVLRLDGTGYLQCVLSDDLQCYNQVLLSTESSVAVYGMNLNLTGPKGQAPGGHEL      |
| 06:10116 68404 NM_001025635 Nars Rattus_norvegicus          | KNLMFLVLRLDGTGYLQCVLSDDLQCYNQVLLSTESSVAVYGMNLNLTGPKGQAPGGHEL      |
| 06:10116 68404 NM_001142949 Nars Rattus_norvegicus          | KNLMFLVLRLDGTGYLQCVLSDDLQCYNQVLLSTESSVAVYGMNLNLTGPKGQAPGGHEL      |
| 07:10090 68404 NM_001142950 Nars Mus_musculus               | KNLMFLVLRLDGTGYLQCVLSDDLQCYNQVLLSTESSVAVYGMNLNLTGPKGQAPGGHEL      |
| 07:10090 68404 NM_027350 Nars Mus_musculus                  | KNLMFLVLRLDGTGYLQCVLSDDLQCYNQVLLSTESSVAVYGMNLNLTGPKGQAPGGHEL      |
| 08:9031 68404 NM_001031400 NARS Gallus_gallus               | KNLMFIVLRLDGTGFLQCVLSDALQCYNGLLLSTESSVAVYGMNLNLTGPKGQAPGGHEL      |
| 12:7227 68404 NM_001273632 Aats-asn Drosophila_melanogaster | KSILFIFTLRLDGTGFLQCVLNDQLCQTYDALTLSTESSVVLFGTLKLVPGEKGTAPGGHEL    |
| 12:7227 68404 NM_136104 Aats-asn Drosophila_melanogaster    | KSILFIFTLRLDGTGFLQCVLNDQLCQTYDALTLSTESSVVLFGTLKLVPGEKGTAPGGHEL    |
| 13:6239 68404 NM_001026234 nars-1 Caenorhabditis_elegans    | KSILMFLVLRLDGYGFLQCVLNDKLCQSYDAVTLSTSTSVQVYGIKALPDGKSAPDGHLE      |
| 00:1 Ac-ASVLQSVSLEVTR                                       | -----                                                             |
| 01:9606 68404 0#NP_004530 NARS Homo_sapiens                 | CDFWELIGLAPAGGADNLINEESDQVQVQLNNRHHMIRGENMSKILKARSMVTRCFRDHFF     |
| 01:9606 68404 NM_004539 NARS Homo_sapiens                   | CDFWELIGLAPAGGADNLINEESDQVQVQLNNRHHMIRGENMSKILKARSMVTRCFRDHFF     |
| 02:9598 68404 NM_001246373 NARS Pan_troglodytes             | CDFWELIGLAPAGGADNLINEESDQVQVQLNNRHHMIRGENMSKILKARSMVTRCFRDHFF     |
| 04:9913 68404 NM_001046572 NARS Bos_taurus                  | CDFWELIGLAPAGGADNLINEESDQVQVQLNNRHHMIRGENMSKILKARSVITRCFRDHFF     |
| 06:10116 68404 NM_001025635 Nars Rattus_norvegicus          | CDFWELVGLAPAGGADNLINEESDQVQVQLNNRHHMIRGENMSKILKARSMITRCFRDHFF     |
| 06:10116 68404 NM_001142949 Nars Rattus_norvegicus          | CDFWELVGLAPAGGADNLINEESDQVQVQLNNRHHMIRGENMSKILKARSMITRCFRDHFF     |
| 07:10090 68404 NM_001142950 Nars Mus_musculus               | CDFWELVGLAPAGGADNLINEESDQVQVQLNNRHHMIRGENMSKILKARSMITRCFRDHFF     |
| 07:10090 68404 NM_027350 Nars Mus_musculus                  | CDFWELVGLAPAGGADNLINEESDQVQVQLNNRHHMIRGENMSKILKARSMITRCFRDHFF     |
| 08:9031 68404 NM_001031400 NARS Gallus_gallus               | CDYWELIGLAPAGGADNLLNEDSEVDQVQLNNRHHMIRGENMSKIFKVRSMVVQAFRDHFF     |
| 12:7227 68404 NM_001273632 Aats-asn Drosophila_melanogaster | VDYWELIGLAPPGADAILNEEAQPDVQLDNHRIIMRGENTSKVLKMRSVVTVQAFRGHYE      |
| 12:7227 68404 NM_136104 Aats-asn Drosophila_melanogaster    | VDYWELIGLAPPGADAILNEEAQPDVQLDNHRIIMRGENTSKVLKMRSVVTVQAFRGHYE      |
| 13:6239 68404 NM_001026234 nars-1 Caenorhabditis_elegans    | VDYWEVIGKAPAGGIDNVLNESAGVDVMDLNRLHVRIGENASRILIRAAATRAMRDHFF       |
| 00:1 Ac-ASVLQSVSLEVTR                                       | -----                                                             |
| 01:9606 68404 0#NP_004530 NARS Homo_sapiens                 | DRGYEVTPPTLVQTVQVEGGATLFKLDYFGEEAFLTQSSQLYLETCLPALGDVFCIAQSY      |
| 01:9606 68404 NM_004539 NARS Homo_sapiens                   | DRGYEVTPPTLVQTVQVEGGATLFKLDYFGEEAFLTQSSQLYLETCLPALGDVFCIAQSY      |
| 02:9598 68404 NM_001246373 NARS Pan_troglodytes             | DRGYEVTPPTLVQTVQVEGGATLFKLDYFGEEAFLTQSSQLYLETCLPALGDVFCIAQSY      |
| 04:9913 68404 NM_001046572 NARS Bos_taurus                  | DRGYHBITPPTLVQTVQVEGGATLFKLDYFGEEAFLTQSSQLYLETCLPALGDVFCIAQSY     |
| 06:10116 68404 NM_001025635 Nars Rattus_norvegicus          | DRGYCEVTPPTLVQTVQVEGGATLFKLDYFGEEAFLTQSSQLYLETCLPALGDVFCIAQSY     |
| 06:10116 68404 NM_001142949 Nars Rattus_norvegicus          | DRGYCEVTPPTLVQTVQVEGGATLFKLDYFGEEAFLTQSSQLYLETCLPALGDVFCIAQSY     |
| 07:10090 68404 NM_001142950 Nars Mus_musculus               | DRGYCEVTPPTLVQTVQVEGGATLFKLDYFGEEAFLTQSSQLYLETCLPALGDVFCIAQSY     |

07:10090|68404|NM\_027350|Nars|Mus\_musculus  
08:9031|68404|NM\_001031400|NARS|Gallus\_gallus  
12:7227|68404|NM\_001273632|Aats-asn|Drosophila\_melanogaster  
12:7227|68404|NM\_136104|Aats-asn|Drosophila\_melanogaster  
13:6239|68404|NM\_001026234|nars-1|Caenorhabditis\_elegans

00:1|Ac-ASVLQSVSLEVTR  
01:9606|68404|0#NP\_004530|NARS|Homo\_sapiens  
01:9606|68404|NM\_004539|NARS|Homo\_sapiens  
02:9598|68404|NM\_001246373|NARS|Pan\_troglodytes  
04:9913|68404|NM\_001046572|NARS|Bos\_taurus  
06:10116|68404|NM\_001025635|Nars|Rattus\_norvegicus  
06:10116|68404|NM\_001142949|Nars|Rattus\_norvegicus  
07:10090|68404|NM\_001142950|Nars|Mus\_musculus  
07:10090|68404|NM\_027350|Nars|Mus\_musculus  
08:9031|68404|NM\_001031400|NARS|Gallus\_gallus  
12:7227|68404|NM\_001273632|Aats-asn|Drosophila\_melanogaster  
12:7227|68404|NM\_136104|Aats-asn|Drosophila\_melanogaster  
13:6239|68404|NM\_001026234|nars-1|Caenorhabditis\_elegans

00:1|Ac-ASVLQSVSLEVTR  
01:9606|68404|0#NP\_004530|NARS|Homo\_sapiens  
01:9606|68404|NM\_004539|NARS|Homo\_sapiens  
02:9598|68404|NM\_001246373|NARS|Pan\_troglodytes  
04:9913|68404|NM\_001046572|NARS|Bos\_taurus  
06:10116|68404|NM\_001025635|Nars|Rattus\_norvegicus  
06:10116|68404|NM\_001142949|Nars|Rattus\_norvegicus  
07:10090|68404|NM\_001142950|Nars|Mus\_musculus  
07:10090|68404|NM\_027350|Nars|Mus\_musculus  
08:9031|68404|NM\_001031400|NARS|Gallus\_gallus  
12:7227|68404|NM\_001273632|Aats-asn|Drosophila\_melanogaster  
12:7227|68404|NM\_136104|Aats-asn|Drosophila\_melanogaster  
13:6239|68404|NM\_001026234|nars-1|Caenorhabditis\_elegans

00:1|Ac-ASVLQSVSLEVTR  
01:9606|68404|0#NP\_004530|NARS|Homo\_sapiens  
01:9606|68404|NM\_004539|NARS|Homo\_sapiens  
02:9598|68404|NM\_001246373|NARS|Pan\_troglodytes  
04:9913|68404|NM\_001046572|NARS|Bos\_taurus  
06:10116|68404|NM\_001025635|Nars|Rattus\_norvegicus  
06:10116|68404|NM\_001142949|Nars|Rattus\_norvegicus  
07:10090|68404|NM\_001142950|Nars|Mus\_musculus  
07:10090|68404|NM\_027350|Nars|Mus\_musculus  
08:9031|68404|NM\_001031400|NARS|Gallus\_gallus  
12:7227|68404|NM\_001273632|Aats-asn|Drosophila\_melanogaster  
12:7227|68404|NM\_136104|Aats-asn|Drosophila\_melanogaster  
13:6239|68404|NM\_001026234|nars-1|Caenorhabditis\_elegans

00:1|Ac-ASVLQSVSLEVTR  
01:9606|68404|0#NP\_004530|NARS|Homo\_sapiens  
01:9606|68404|NM\_004539|NARS|Homo\_sapiens  
02:9598|68404|NM\_001246373|NARS|Pan\_troglodytes  
04:9913|68404|NM\_001046572|NARS|Bos\_taurus  
06:10116|68404|NM\_001025635|Nars|Rattus\_norvegicus  
06:10116|68404|NM\_001142949|Nars|Rattus\_norvegicus  
07:10090|68404|NM\_001142950|Nars|Mus\_musculus  
07:10090|68404|NM\_027350|Nars|Mus\_musculus  
08:9031|68404|NM\_001031400|NARS|Gallus\_gallus  
12:7227|68404|NM\_001273632|Aats-asn|Drosophila\_melanogaster  
12:7227|68404|NM\_136104|Aats-asn|Drosophila\_melanogaster  
13:6239|68404|NM\_001026234|nars-1|Caenorhabditis\_elegans

DRGYCEVTTPTTLVQTQVEGGATLFKLDYFGEEAFLTQSSQLYLETCLPALGDVFCIAQSY  
ANGYYEVTPPTLVQTQVEGGSTLFKLDYFGEEAYLTQSSQLYLETCLPALGDVFCIAQSY  
ARGYNEVTPPTLVQTQVEGGSTLFKLYFGEEAYLTQSSQLYLETCLPALGDVFTISQSY  
ARGYNEVTPPTLVQTQVEGGSTLFKLYFGEEAYLTQSSQLYLETCLPALGDVFTISQSY  
AAGYTEVAPPTLVQTQVEGGSTLFGLDYYGEPAYLTQSSQLYLETCNAALGDVYCISQSY

-----  
RAEQSRTRRHLAEYTHVEAECPFLLTFD DLLNRLEDLVCDVVDRI LKSPAGS-IVHELNP N  
RAEQSRTRRHLAEYTHVEAECPFLLTFD DLLNRLEDLVCDVVDRI LKSPAGS-IVHELNP N  
RAEQSRTRRHLAEYTHVEAECPFLLTFD DLLNRLEDLVCDVVDRI LKSPAGS-IVHELNP N  
RAEQSRTRRHLAEYTHVEAECPFLLTFEELLNRLEDLVCDVVDRI LKSPAGN-IVRDLNP N  
RAEQSRTRRHLAEYTHVEAECPFLLTFEDLLSRLEDLVCDVVDRI LKSPVAS-IVYDLNP N  
RAEQSRTRRHLAEYTHVEAECPFLLTFEDLLSRLEDLVCDVVDRI LKSPVAS-IVYDLNP N  
RAEQSRTRRHLAEYTHVEAECPFLLTFEDLLNRLEDLVCDVVDRI LKSPVAS-IVYELNP N  
RAEQSRTRRHLAEYTHVEAECPFLLTFEDLLNRLEDLVCDVVDRI LKSPVAS-IVYELNP N  
RAEQSRTRRHLAEYTHVEAECPFLLTFEDLLNRLEDLVCDVVDRI LKSPAS-LLDLNP N  
RAEQSRTRRHLAEYTHVEAECPFLLTFD DLLDRLEDLVCDVVDRI LKSPWGY-LVKELNP D  
RAEQSRTRRHLAEYTHVEAECPFLLTFD DLLDRLEDLVCDVVDRI LKSPWGY-LVKELNP D  
RAEQSRTRRHLSEYQHVEAECAFLTDFQLMDRIEALVCDTVDRLLADPVTKSLIEFVNPG

-----  
FQPPKRPFKRMNYSDAIVWLKEHDVKKEDGTFYEFGED IPEAPERLMTDTINEP ILLCRF  
FQPPKRPFKRMNYSDAIVWLKEHDVKKEDGTFYEFGED IPEAPERLMTDTINEP ILLCRF  
FQPPKRPFKRMNYSDAIVWLKEHDVKKEDGTFYEFGED IPEAPERLMTDTINEP ILLCRF  
FKAPKRPFRMRNYSDAIEWLREHDVKKEDGTFYEFGDD IPEAPERLMTDTINEP ILLCRF  
FKAPKRPFRMRNYSDAIEWLREHDVKKEDGTFYEFGDD IPEAPERLMTDTINEP ILLCRF  
FKPPKRPFRMRNYSDAIEWLKEHDVKKEDGTFYEFGDD IPEAPERLMTDTINEP ILLCRF  
FKPPKRPFRMRNYSDAIEWLKEHDVKKEDGTFYEFGDD IPEAPERLMTDTINEP ILLCRF  
FKPPKRPFRMRNYSDAIEWLREHDVKKEDGTFYEFGDD IPEAPERLMTDTINEP ILLCRF  
FKPPKRPFRMRNYSDAIEWLKEHDVKKEDGTFYEFGDD IPEAPERLMTDTINEP ILLCRF  
FKPPKRPFRMRNYSDAIEWLKEHDVKKDDGTFYEFGED IPEAPERFMTDTINEP ILLCRF  
FKPPQKPFRRMNYESDAIKWLKENNVTKDDGTFYEFGED IPEAPERKMTDTINEP IMLCRF  
YKAPARPFKRMPYKEAIEWLQKNDVRNEMGEKFVYGED IAEAAERRMTDTIGVPILLNRF

-----  
PVEIKSFYMQRCPEDSRLTESVDV LMPNVGEIVGGS MRIFDSEE ILAGYKREGIDPTPY  
PVEIKSFYMQRCPEDSRLTESVDV LMPNVGEIVGGS MRIFDSEE ILAGYKREGIDPTPY  
PVEIKSFYMQRCPEDSRLTESVDV LMPNVGEIVGGS MRIFNSEE ILAGYKREGIDPTPY  
PVEIKSFYMQRCPEDPRLTESVDV LMPNVGEIVGGS MRIWDNEE ILAGYKREGIDPTPY  
PVEIKSFYMQRCPEDPRLTESVDV LMPNVGEIVGGS MRSDWSEE ILEGYKREGIDPAPY  
PVEIKSFYMQRCPEDPRLTESVDV LMPNVGEIVGGS MRSDWSEE ILEGYKREGIDPAPY  
PVEIKSFYMQRCPEDPRLTESVDV LMPNVGEIVGGS MRSDWSEE ILEGYKREGIDPAPY  
PVEIKSFYMQRCPEDPRLTESVDV LMPNVGEIVGGS MRSDWSEE ILEGYKREGIDPAPY  
PVEIKSFYMQRCCHDSRLTESVDV LMPNVGEIVGGS MRIWDSEELLEGYKREGIDPTPY  
PVEIKSFYMQRCCKEDQRLTESVDV L LPNVGEIVGGS MRIYDSEEL LKGYKREGIDPQPY  
PVEIKSFYMQRCCKEDQRLTESVDV L LPNVGEIVGGS MRIYDSEEL LKGYKREGIDPQPY  
PHGIKAFYMPRCADDNELTESVD L LMPGVGEIVGGS MRIWKEDQLLAAFEKGLDSKNYY

-----  
WYTDQRKYGTCPHGGYGLGLERFLT WILNRYHIRDVCLYPRFVQRCTP  
WYTDQRKYGTCPHGGYGLGLERFLT WILNRYHIRDVCLYPRFVQRCTP  
WYTDQRKYGTCPHGGYGLGLERFLT WILNRYHIRDVCLYPRFVQRCTP  
WYTDQRKYGTCPHGGYGLGLERFLT WILDRYHIRDVCLYPRFVQRCKP  
WYTDQRKYGTCPHGGYGLGLERFLSWILNRYHIRDVCLYPRFLQRCRP  
WYTDQRKYGTCPHGGYGLGLERFLSWILNRYHIRDVCLYPRFLQRCRP  
WYTDQRKYGTCPHGGYGLGLERFLSWILNRYHIRDVCLYPRFLQRCRP  
WYTDQRKYGTCPHGGYGLGLERFLSWILNRYHIRDVCLYPRFLQRCRP  
WYTDQRKYGTCPHGGYGLGLERFLSWILNRYHIRDVCLYPRFLQRCRP  
WYTDQRKYGTCPHGGYGLGLERFLTWILDRHHIRDVCLYPRFVQRCKP  
WYTDQRVYGTMPHGGYGLGLERFLCWL NRYHIREVCLYPRFLDRCRP  
WYTDQRVYGTMPHGGYGLGLERFLCWL NRYHIREVCLYPRFLDRCRP  
WYMDQRKYGSVPHGGYGLGLERFI CWLTDTNHIRDVCLYPRFVGRCAP

***TUBB3***

Ac-RRPQFWEVISDEHGIDPSGNYVGDSLQLER

CLUSTAL O(1.2.1) multiple sequence alignment

|                                                  |                                                               |
|--------------------------------------------------|---------------------------------------------------------------|
| 00:1 Ac-RRPQFWEVISDEHGIDPSGNYVGDSLDQLER          | -----RHSRPTPLNRDREEPQA---ARPQQQPHEHTVGQGGASLENKRSISR          |
| 01:9606 68503 NM_001197181 TUBB3 Homo_sapiens    | DISRCEGRGRGYKSARPRSPTLSSSQGPPAPVRSRPPDAP-----                 |
| 01:9606 68503 NM_006086 TUBB3 Homo_sapiens       | -----SSQPGPPAPVRSRPPDAP-----                                  |
| 02:9598 68503 NM_001279958 TUBB3 Pan_troglodytes | -----ASAASCSRSARVSQPPAIAP-----                                |
| 04:9913 68503 NM_001077127 TUBB3 Bos_taurus      | -----PSEV-----                                                |
| 06:10116 68503 NM_139254 Tubb3 Rattus_norvegicus | -----PREV-----                                                |
| 07:10090 68503 NM_023279 Tubb3 Mus_musculus      | -----EQNRV-----                                               |
| 08:9031 68503 NM_001031598 TUBB3 Gallus_gallus   |                                                               |
| 09:8364 68503 NM_204077 tubb3 Xenopus_tropicalis |                                                               |
| 00:1 Ac-RRPQFWEVISDEHGIDPSGNYVGDSLDQLER          | -----RRPQFWEVISDEHGIDPSGNYVGDSLDQL                            |
| 01:9606 68503 NM_001197181 TUBB3 Homo_sapiens    | LSKLESFLREKRETGTGPRHPHTALCTQTGHRRPQFWEVISDEHGIDPSGNYVGDSLDQL  |
| 01:9606 68503 NM_006086 TUBB3 Homo_sapiens       | -----SMRE-----IVHIQAGQC--GNQIGAKFWEVISDEHGIDPSGNYVGDSLDQL     |
| 02:9598 68503 NM_001279958 TUBB3 Pan_troglodytes | -----SMRE-----IVHIQAGQC--GNQIGAKFWEVISDEHGIDPSGNYVGDSLDQL     |
| 04:9913 68503 NM_001077127 TUBB3 Bos_taurus      | -----SMRE-----IVHIQAGQC--GNQIGAKFWEVISDEHGIDPSGNYVGDSLDQL     |
| 06:10116 68503 NM_139254 Tubb3 Rattus_norvegicus | -----SMRE-----IVHIQAGQC--GNQIGAKFWEVISDEHGIDPSGNYVGDSLDQL     |
| 07:10090 68503 NM_023279 Tubb3 Mus_musculus      | -----SMRE-----IVHIQAGQC--GNQIGAKFWEVISDEHGIDPSGNYVGDSLDQL     |
| 08:9031 68503 NM_001031598 TUBB3 Gallus_gallus   | -----MRE-----IVHIQAGQC--GNQIGAKFWEVISDEHGIDPSGNYVGDSLDQL      |
| 09:8364 68503 NM_204077 tubb3 Xenopus_tropicalis | -----TMRE-----IVHIQAGQC--GNQIGAKFWEVISDEHGIDPCGNYIGDSLDQL     |
|                                                  | :*****.***:*****                                              |
| 00:1 Ac-RRPQFWEVISDEHGIDPSGNYVGDSLDQLER          | ER-----                                                       |
| 01:9606 68503 NM_001197181 TUBB3 Homo_sapiens    | ERISVYNEASSHKYVPRAILVDLEPGTMDSVRSAGFAGHLFRPDNFI FGQSGAGNNWAKG |
| 01:9606 68503 NM_006086 TUBB3 Homo_sapiens       | ERISVYNEASSHKYVPRAILVDLEPGTMDSVRSAGFAGHLFRPDNFI FGQSGAGNNWAKG |
| 02:9598 68503 NM_001279958 TUBB3 Pan_troglodytes | ERISVYNEASSHKYVPRAILVDLEPGTMDSVRSAGFAGHLFRPDNFI FGQSGAGNNWAKG |
| 04:9913 68503 NM_001077127 TUBB3 Bos_taurus      | ERISVYNEASSHKYVPRAILVDLEPGTMDSVRSAGFAGHLFRPDNFI FGQSGAGNNWAKG |
| 06:10116 68503 NM_139254 Tubb3 Rattus_norvegicus | ERISVYNEASSHKYVPRAILVDLEPGTMDSVRSAGFAGHLFRPDNFI FGQSGAGNNWAKG |
| 07:10090 68503 NM_023279 Tubb3 Mus_musculus      | ERISVYNEASSHKYVPRAILVDLEPGTMDSVRSAGFAGHLFRPDNFI FGQSGAGNNWAKG |
| 08:9031 68503 NM_001031598 TUBB3 Gallus_gallus   | ERISVYNEASSHKYVPRAILVDLEPGTMDSVRSAGFAGHLFRPDNFI FGQSGAGNNWAKG |
| 09:8364 68503 NM_204077 tubb3 Xenopus_tropicalis | ERISVYNEASSHKYVPRAILVDLEPGTMDSVRSAGFAGHLFRPDNFI FGQSGAGNNWAKG |
|                                                  | **                                                            |
| 00:1 Ac-RRPQFWEVISDEHGIDPSGNYVGDSLDQLER          | -----                                                         |
| 01:9606 68503 NM_001197181 TUBB3 Homo_sapiens    | HYTEGAELVDSVLDVVRKECENCDCQLQGFQLTHSLGGGTGSGMGTTLLISKVREYPPRIM |
| 01:9606 68503 NM_006086 TUBB3 Homo_sapiens       | HYTEGAELVDSVLDVVRKECENCDCQLQGFQLTHSLGGGTGSGMGTTLLISKVREYPPRIM |
| 02:9598 68503 NM_001279958 TUBB3 Pan_troglodytes | HYTEGAELVDSVLDVVRKECENCDCQLQGFQLTHSLGGGTGSGMGTTLLISKVREYPPRIM |
| 04:9913 68503 NM_001077127 TUBB3 Bos_taurus      | HYTEGAELVDSVLDVVRKECENCDCQLQGFQLTHSLGGGTGSGMGTTLLISKVREYPPRIM |
| 06:10116 68503 NM_139254 Tubb3 Rattus_norvegicus | HYTEGAELVDSVLDVVRKECENCDCQLQGFQLTHSLGGGTGSGMGTTLLISKVREYPPRIM |
| 07:10090 68503 NM_023279 Tubb3 Mus_musculus      | HYTEGAELVDSVLDVVRKECENCDCQLQGFQLTHSLGGGTGSGMGTTLLISKVREYPPRIM |
| 08:9031 68503 NM_001031598 TUBB3 Gallus_gallus   | HYTEGAELVDSVLDVVRKECENCDCQLQGFQLTHSLGGGTGSGMGTTLLISKVREYPPRIM |
| 09:8364 68503 NM_204077 tubb3 Xenopus_tropicalis | HYTEGAELVDSVLDVVRKECENCDCQLQGFQLTHSLGGGTGSGMGTTLLISKVREYPPRIM |
| 00:1 Ac-RRPQFWEVISDEHGIDPSGNYVGDSLDQLER          | -----                                                         |
| 01:9606 68503 NM_001197181 TUBB3 Homo_sapiens    | NTFSVVPSPKVSDTVVEPYNATLSIHQLVENTDETYCIDNEALYDICFRTLKLATPTYGD  |
| 01:9606 68503 NM_006086 TUBB3 Homo_sapiens       | NTFSVVPSPKVSDTVVEPYNATLSIHQLVENTDETYCIDNEALYDICFRTLKLATPTYGD  |
| 02:9598 68503 NM_001279958 TUBB3 Pan_troglodytes | NTFSVVPSPKVSDTVVEPYNATLSIHQLVENTDETYCIDNEALYDICFRTLKLATPTYGD  |
| 04:9913 68503 NM_001077127 TUBB3 Bos_taurus      | NTFSVVPSPKVSDTVVEPYNATLSIHQLVENTDETYCIDNEALYDICFRTLKLATPTYGD  |
| 06:10116 68503 NM_139254 Tubb3 Rattus_norvegicus | NTFSVVPSPKVSDTVVEPYNATLSIHQLVENTDETYCIDNEALYDICFRTLKLATPTYGD  |
| 07:10090 68503 NM_023279 Tubb3 Mus_musculus      | NTFSVVPSPKVSDTVVEPYNATLSIHQLVENTDETYCIDNEALYDICFRTLKLATPTYGD  |
| 08:9031 68503 NM_001031598 TUBB3 Gallus_gallus   | NTFSVVPSPKVSDTVVEPYNATLSIHQLVENTDETYCIDNEALYDICFRTLKLATPTYGD  |
| 09:8364 68503 NM_204077 tubb3 Xenopus_tropicalis | NTFSVVPSPKVSDTVVEPYNATLSIHQLVENTDETYCIDNEALYDICFRTLKLATPTYGD  |
| 00:1 Ac-RRPQFWEVISDEHGIDPSGNYVGDSLDQLER          | -----                                                         |
| 01:9606 68503 NM_001197181 TUBB3 Homo_sapiens    | LNHLVSATMSGVTTSLRFPGQLNADLRKLAVNMVFPRLHFFMPGFAPLTARGSQQYRAL   |
| 01:9606 68503 NM_006086 TUBB3 Homo_sapiens       | LNHLVSATMSGVTTSLRFPGQLNADLRKLAVNMVFPRLHFFMPGFAPLTARGSQQYRAL   |
| 02:9598 68503 NM_001279958 TUBB3 Pan_troglodytes | LNHLVSATMSGVTTSLRFPGQLNADLRKLAVNMVFPRLHFFMPGFAPLTARGSQQYRAL   |
| 04:9913 68503 NM_001077127 TUBB3 Bos_taurus      | LNHLVSATMSGVTTSLRFPGQLNADLRKLAVNMVFPRLHFFMPGFAPLTARGSQQYRAL   |
| 06:10116 68503 NM_139254 Tubb3 Rattus_norvegicus | LNHLVSATMSGVTTSLRFPGQLNADLRKLAVNMVFPRLHFFMPGFAPLTARGSQQYRAL   |
| 07:10090 68503 NM_023279 Tubb3 Mus_musculus      | LNHLVSATMSGVTTSLRFPGQLNADLRKLAVNMVFPRLHFFMPGFAPLTARGSQQYRAL   |
| 08:9031 68503 NM_001031598 TUBB3 Gallus_gallus   | LNHLVSATMSGVTTSLRFPGQLNADLRKLAVNMVFPRLHFFMPGFAPLTARGSQQYRAL   |
| 09:8364 68503 NM_204077 tubb3 Xenopus_tropicalis | LNHLVSATMSGVTTSLRFPGQLNADLRKLAVNMVFPRLHFFMPGFAPLTARGSQQYRAL   |
| 00:1 Ac-RRPQFWEVISDEHGIDPSGNYVGDSLDQLER          | -----                                                         |
| 01:9606 68503 NM_001197181 TUBB3 Homo_sapiens    | TVPELTQQMFDAKNMMAACDPRHGRYLTVATVFRGRMSMKEVDEQMLAIQSKNSSYFVEW  |
| 01:9606 68503 NM_006086 TUBB3 Homo_sapiens       | TVPELTQQMFDAKNMMAACDPRHGRYLTVATVFRGRMSMKEVDEQMLAIQSKNSSYFVEW  |
| 02:9598 68503 NM_001279958 TUBB3 Pan_troglodytes | TVPELTQQMFDAKNMMAACDPRHGRYLTVATVFRGRMSMKEVDEQMLAIQSKNSSYFVEW  |
| 04:9913 68503 NM_001077127 TUBB3 Bos_taurus      | TVPELTQQMFDAKNMMAACDPRHGRYLTVATVFRGRMSMKEVDEQMLAIQSKNSSYFVEW  |
| 06:10116 68503 NM_139254 Tubb3 Rattus_norvegicus | TVPELTQQMFDAKNMMAACDPRHGRYLTVATVFRGRMSMKEVDEQMLAIQSKNSSYFVEW  |
| 07:10090 68503 NM_023279 Tubb3 Mus_musculus      | TVPELTQQMFDAKNMMAACDPRHGRYLTVATVFRGRMSMKEVDEQMLAIQSKNSSYFVEW  |
| 08:9031 68503 NM_001031598 TUBB3 Gallus_gallus   | TVPELTQQMFDAKNMMAACDPRHGRYLTVATVFRGRMSMKEVDEQMLAIQSKNSSYFVEW  |
| 09:8364 68503 NM_204077 tubb3 Xenopus_tropicalis | TVPELTQQMFDAKNMMAACDPRHGRYLTVATVFRGRMSMKEVDEQMLAIQSKNSSYFVEW  |
| 00:1 Ac-RRPQFWEVISDEHGIDPSGNYVGDSLDQLER          | -----                                                         |
| 01:9606 68503 NM_001197181 TUBB3 Homo_sapiens    | IPNNVKVAVCDIPPRGLKMSSTFIGNSTAIQELFKRISEQFTAMFRRKAFHLHWYTGEGMD |
| 01:9606 68503 NM_006086 TUBB3 Homo_sapiens       | IPNNVKVAVCDIPPRGLKMSSTFIGNSTAIQELFKRISEQFTAMFRRKAFHLHWYTGEGMD |
| 02:9598 68503 NM_001279958 TUBB3 Pan_troglodytes | IPNNVKVAVCDIPPRGLKMSSTFIGNSTAIQELFKRISEQFTAMFRRKAFHLHWYTGEGMD |
| 04:9913 68503 NM_001077127 TUBB3 Bos_taurus      | IPNNVKVAVCDIPPRGLKMSSTFIGNSTAIQELFKRISEQFTAMFRRKAFHLHWYTGEGMD |
| 06:10116 68503 NM_139254 Tubb3 Rattus_norvegicus | IPNNVKVAVCDIPPRGLKMSSTFIGNSTAIQELFKRISEQFTAMFRRKAFHLHWYTGEGMD |

|          |  |                              |        |              |  |       |  |                    |                                                           |      |
|----------|--|------------------------------|--------|--------------|--|-------|--|--------------------|-----------------------------------------------------------|------|
| 07:10090 |  | 68503                        |        | NM_023279    |  | Tubb3 |  | Mus_musculus       | IPNNVKVAVCDIPPRGLKMSSTFIGNSTAIQELFKRISEQFTAMFRRKAFLHWYTGE | GMD  |
| 08:9031  |  | 68503                        |        | NM_001031598 |  | TUBB3 |  | Gallus_gallus      | IPNNVKVAVCDIPPRGLKMSSTFIGNSTAIQELFKRISEQFTAMFRRKAFLHWYTGE | GMD  |
| 09:8364  |  | 68503                        |        | NM_204077    |  | tubb3 |  | Xenopus_tropicalis | IPNNVKVAVCDIPPRGLKMSSTFIGNSTAIQELFKRISEQFTAMFRRKAFLHWYTGE | GMD  |
|          |  |                              |        |              |  |       |  |                    |                                                           |      |
| 00:1     |  | Ac-RRPQFWEVISDEHGIDPSGNYVGDS | DLQLER |              |  | ----- |  |                    |                                                           |      |
| 01:9606  |  | 68503                        |        | NM_001197181 |  | TUBB3 |  | Homo_sapiens       | EMEFTEAESNMNDLVSEYQQYQDATAEEEGEMYEDDEEESEA                | QGPK |
| 01:9606  |  | 68503                        |        | NM_006086    |  | TUBB3 |  | Homo_sapiens       | EMEFTEAESNMNDLVSEYQQYQDATAEEEGEMYEDDEEESEA                | QGPK |
| 02:9598  |  | 68503                        |        | NM_001279958 |  | TUBB3 |  | Pan_troglodytes    | EMEFTEAESNMNDLVSEYQQYQDATAEEEGEMYEDDEEESEA                | QGPK |
| 04:9913  |  | 68503                        |        | NM_001077127 |  | TUBB3 |  | Bos_taurus         | EMEFTEAESNMNDLVSEYQQYQDATAEEEGEMYEDDEEESEA                | QGPK |
| 06:10116 |  | 68503                        |        | NM_139254    |  | Tubb3 |  | Rattus_norvegicus  | EMEFTEAESNMNDLVSEYQQYQDATAEEEGEMYEDDDEESEA                | QGPK |
| 07:10090 |  | 68503                        |        | NM_023279    |  | Tubb3 |  | Mus_musculus       | EMEFTEAESNMNDLVSEYQQYQDATAEEEGEMYEDDDEESEA                | QGPK |
| 08:9031  |  | 68503                        |        | NM_001031598 |  | TUBB3 |  | Gallus_gallus      | EMEFTEAESNMNDLVSEYQQYQDATAEEEGEMYEDDEEESEQ                | GAK- |
| 09:8364  |  | 68503                        |        | NM_204077    |  | tubb3 |  | Xenopus_tropicalis | EMEFTEAESNMNDLVSEYQQYQDATAEEEGEMYEDDEEESEG                | QGK- |

*CDR2*

Ac-AEGGGAGEEPGAAAEAGRR

CLUSTAL O(1.2.1) multiple sequence alignment

|                                                   |  |                                                                  |
|---------------------------------------------------|--|------------------------------------------------------------------|
| 00:1 Ac-AEGGGAGEEPGAAAEAGRR                       |  | -----                                                            |
| 01:9606 7262 0#NP_001793 CDR2 Homo_sapiens        |  | -----                                                            |
| 01:9606 7262 NM_001802 CDR2 Homo_sapiens          |  | -----DSGSRSSHRNARPLGPSVGARRV-----EAAGR-----SAAAGNGAEAAQ          |
| 03:9544 7262 NM_001260929 CDR2 Macaca_mulatta     |  | -----                                                            |
| 04:9913 7262 NM_001046383 CDR2 Bos_taurus         |  | RWARLRREEPPARRADSGARAGAPAVGAVGRRERTQSAACAAGRRAAAPEAVAGGCGPASR    |
| 06:10116 7262 NM_001025682 CDR2 Rattus_norvegicus |  | -----                                                            |
| 07:10090 7262 NM_007672 CDR2 Mus_musculus         |  | -----GAGLW-----AARDSGE                                           |
| 08:9031 7262 NM_001030642 CDR2 Gallus_gallus      |  | -----EGGEVRQSP                                                   |
| 09:8364 7262 NM_001005649 cdr2 Xenopus_tropicalis |  | -----                                                            |
| 00:1 Ac-AEGGGAGEEPGAAAEAGRR                       |  | -----AEGGGAGEEPGAAAEAGR-R-----                                   |
| 01:9606 7262 0#NP_001793 CDR2 Homo_sapiens        |  | -----MLAENLVEEFEMKED                                             |
| 01:9606 7262 NM_001802 CDR2 Homo_sapiens          |  | RSLGGGASRPRAALAEAGGGAGEEPGAAAEAGR-RRGPLPLEDPAEMLAENLVEEFEMKED    |
| 03:9544 7262 NM_001260929 CDR2 Macaca_mulatta     |  | -----GEEPGAAAEAGRRRRRGLPLEDPAEMLAENLVEEFEMKED                    |
| 04:9913 7262 NM_001046383 CDR2 Bos_taurus         |  | WSLGGGASRPRAALAEAGGGAGGEPGAAAEAGRRRRRGLPPPEPAEMLAENLVEEFEMKED    |
| 06:10116 7262 NM_001025682 CDR2 Rattus_norvegicus |  | -----VGGEFGAAAEAGRRQSPLPDPVPGMDLADNLVEEFEI-ED                    |
| 07:10090 7262 NM_007672 CDR2 Mus_musculus         |  | SCCGTCVSRPRVALAEAGGGAGGEPGAAAEAGRRQSPLPDPVPGMDLADNLVEEFEM-ED     |
| 08:9031 7262 NM_001030642 CDR2 Gallus_gallus      |  | ETLGNR----RLLRRGAAAGSPCAAARRE-VSAAPRPRKGAMLADSLVEEFEIRED         |
| 09:8364 7262 NM_001005649 cdr2 Xenopus_tropicalis |  | -----GSAEASVAAAAACSTGVSPG-----ASLRVPAQLEADMLTDSNVEEFEIKED        |
| 00:1 Ac-AEGGGAGEEPGAAAEAGRR                       |  | -----                                                            |
| 01:9606 7262 0#NP_001793 CDR2 Homo_sapiens        |  | EPWYDHDQLQQDLQLAAELGKTLTLLDRNTELEDSVQQMYTTNQEQLQEIEYLTQKQVELLRQ  |
| 01:9606 7262 NM_001802 CDR2 Homo_sapiens          |  | EPWYDHDQLQQDLQLAAELGKTLTLLDRNTELEDSVQQMYTTNQEQLQEIEYLTQKQVELLRQ  |
| 03:9544 7262 NM_001260929 CDR2 Macaca_mulatta     |  | EPWYDHDQLQQDLQLAAELGKTLTLLDRNTELEDSVQQMYTTNQEQLQEIEYLTQKQVELLRQ  |
| 04:9913 7262 NM_001046383 CDR2 Bos_taurus         |  | EPWYDHDQLQQDLQLAAELGKTLTLLDRNTELEDSVQQMYTTNQEQLQEIEYLTQKQVELLRQ  |
| 06:10116 7262 NM_001025682 CDR2 Rattus_norvegicus |  | EPWYDHDQLQQDLQLAAELGKTLTLLDRNTELEDSVQQMYTTNQEQLQEIEYLTQKQVELLRQ  |
| 07:10090 7262 NM_007672 CDR2 Mus_musculus         |  | EPWYDHDQLQQDLQLAAELGKTLTLLDRNTELEDSVQQMYTTNQEQLQEIEYLTQKQVELLRQ  |
| 08:9031 7262 NM_001030642 CDR2 Gallus_gallus      |  | EPWYDQDDLQQDLHLAAELGKTLTLLDRNTELEESLQQMYATNQEQLQEIEYLTQKQVELLRQ  |
| 09:8364 7262 NM_001005649 cdr2 Xenopus_tropicalis |  | EPWYDQHDQLQQDLQLAAELGKTLTLLDRNTELEESLQQMYNTNQEQLQEIEYLTQKQVELLRQ |
| 00:1 Ac-AEGGGAGEEPGAAAEAGRR                       |  | -----                                                            |
| 01:9606 7262 0#NP_001793 CDR2 Homo_sapiens        |  | MNEQHAKVYEQLDVTARELEETNQKLVAESKASQQKILSLTETIECLQTNIDHLSQSQVEE    |
| 01:9606 7262 NM_001802 CDR2 Homo_sapiens          |  | MNEQHAKVYEQLDVTARELEETNQKLVAESKASQQKILSLTETIECLQTNIDHLSQSQVEE    |
| 03:9544 7262 NM_001260929 CDR2 Macaca_mulatta     |  | MNEQHAKVYEQLDVTARELEETNQKLVAESKASQQKILSLTETIECLQTNIDHLSQSQVEE    |
| 04:9913 7262 NM_001046383 CDR2 Bos_taurus         |  | MNEQHAKVYEQLDVTARELEETNQKLVAESKASQQKILSLTETIECLQTNIDHLSQSQVEE    |
| 06:10116 7262 NM_001025682 CDR2 Rattus_norvegicus |  | MNEQHAKVYEQLDVTARELEETNQKLVAESKASQQKILSLTETIECLQTNIDHLSQSQVEE    |
| 07:10090 7262 NM_007672 CDR2 Mus_musculus         |  | MNEQHAKVYEQLDVTARELEETNQKLVAESKASQQKILSLTETIECLQTNIDHLSQSQVEE    |
| 08:9031 7262 NM_001030642 CDR2 Gallus_gallus      |  | MNDQHAKVYEQLDVTARELEETNQKLVAESRASQQKILSLTETIENLQTHVDDLQRQVEE     |
| 09:8364 7262 NM_001005649 cdr2 Xenopus_tropicalis |  | MNEQHAKVYEQLDITARDLENANQKLVLERSASQQKIMSLTETIENLQVHIELQRQVED      |
| 00:1 Ac-AEGGGAGEEPGAAAEAGRR                       |  | -----                                                            |
| 01:9606 7262 0#NP_001793 CDR2 Homo_sapiens        |  | LKSSGQGRRSPGKCDQEKPAFSACLKELYDLRQHFVVDHVFAEKITSLQGQSPDPEEEN      |
| 01:9606 7262 NM_001802 CDR2 Homo_sapiens          |  | LKSSGQGRRSPGKCDQEKPAFSACLKELYDLRQHFVVDHVFAEKITSLQGQSPDPEEEN      |
| 03:9544 7262 NM_001260929 CDR2 Macaca_mulatta     |  | LKSSGRGRRSQGKCDQEKPAFSACLKELYDLRQHFVVDHVFAEKITSLQSQSPDPEEEN      |
| 04:9913 7262 NM_001046383 CDR2 Bos_taurus         |  | LKSSQRRRSQGRHDQEKSAFSFSSLKELYDLRQHFVVDHVFAEKITSLPSQQSPDPEEEN     |
| 06:10116 7262 NM_001025682 CDR2 Rattus_norvegicus |  | LKS-NQGRGRQKACDQEPAPFSFSLKELYDLRQHFVVDHVFAEKITSLQSQSPDPEEEN      |
| 07:10090 7262 NM_007672 CDR2 Mus_musculus         |  | LKSSSQGRGRQKACDQEKPAFSFSLKELYDLRQHFVVDHVFAEKITSLQSQSPDPEEEN      |
| 08:9031 7262 NM_001030642 CDR2 Gallus_gallus      |  | LKSSGRGRMNHRSQDQPRSMHSFSLKELYDLRQFVVDHVFAEKITSMDSQLNPLEEEN       |
| 09:8364 7262 NM_001005649 cdr2 Xenopus_tropicalis |  | LKKPGRICRSRERSDQSRSAQFSCLKELYDLRKYFVDHVFAEKIASLHSGQGPLEDEN       |
| 00:1 Ac-AEGGGAGEEPGAAAEAGRR                       |  | -----                                                            |
| 01:9606 7262 0#NP_001793 CDR2 Homo_sapiens        |  | EHLKKTVTMLQAQLSLERQKRVTMEEFYGLVLKENSELEQQLGATGAYRARALELEAEVA     |
| 01:9606 7262 NM_001802 CDR2 Homo_sapiens          |  | EHLKKTVTMLQAQLSLERQKRVTMEEFYGLVLKENSELEQQLGATGAYRARALELEAEVA     |
| 03:9544 7262 NM_001260929 CDR2 Macaca_mulatta     |  | EHLKKTVTMLQAQLSLERQKRVTMEEFYGLVLKENSELEQQLGATGAYRARALELEAEVA     |
| 04:9913 7262 NM_001046383 CDR2 Bos_taurus         |  | EHLKKTVTMLQAQLSLERQKRVTMEEFYGLVLKENSELEQQLGATDAYRARALELEAEVA     |
| 06:10116 7262 NM_001025682 CDR2 Rattus_norvegicus |  | EHLKKAVTMLQAQLSLERKKRVSAEYKVVVLKENSELEQQLSATDAYRARAQELEAEVA      |
| 07:10090 7262 NM_007672 CDR2 Mus_musculus         |  | EHLKKAVTMLQAQLSLERKKRVSAEYKVVVLKENSELEQQLGATDAYRARALELEAEVA      |
| 08:9031 7262 NM_001030642 CDR2 Gallus_gallus      |  | ENLKKAVTVLQAQLDLEKEKRVTMEEFSLVVKENCdleQRLVDIDLRYARAEHLEVEVA      |
| 09:8364 7262 NM_001005649 cdr2 Xenopus_tropicalis |  | SHLKKALSLSLESQLSLERNKRESLEEEFSQVVKENSELEQMLRDKDLFYARAELEAEVA     |
| 00:1 Ac-AEGGGAGEEPGAAAEAGRR                       |  | -----                                                            |
| 01:9606 7262 0#NP_001793 CDR2 Homo_sapiens        |  | EMRQMLQSEHPFVNGVEKLVDPDSLYVPFKEP-----SQSLLEEMFLTVPESHKPLKRSS     |
| 01:9606 7262 NM_001802 CDR2 Homo_sapiens          |  | EMRQMLQSEHPFVNGVEKLVDPDSLYVPFKEP-----SQSLLEEMFLTVPESHKPLKRSS     |
| 03:9544 7262 NM_001260929 CDR2 Macaca_mulatta     |  | EMRQMLQSEHPFVNGVEKLVDPDSLFVPFKEP-----SQSLLEEMFLTVPESHKPLKRSS     |
| 04:9913 7262 NM_001046383 CDR2 Bos_taurus         |  | EMRQMLQAEHPFVNGVEKLVDPDSLFVPFKEP-----GQSLLEEMFLTVPESHKPLKRSS     |
| 06:10116 7262 NM_001025682 CDR2 Rattus_norvegicus |  | EMRQMLQAEHPFVNGVEKLVDPDSLFVPFKEP-----SQSLLEEMFLAEPAPRKPLKRSS     |
| 07:10090 7262 NM_007672 CDR2 Mus_musculus         |  | EMRQMLQAEHPFVNGVEKLVDPDSLFVPFKEP-----SQSLLEEMFLAEPAPRKPLKRSS     |
| 08:9031 7262 NM_001030642 CDR2 Gallus_gallus      |  | EMRQMLQSENT-IHSAEKLVPESFFISFKESLERELGQSPADDGLLTVPELDCKALKKRSS    |
| 09:8364 7262 NM_001005649 cdr2 Xenopus_tropicalis |  | EMRQICRSDSVFASSVEKLIPESIFISFKETADKEADQEVIM---AQLLDLNNKPLKRSS     |
| 00:1 Ac-AEGGGAGEEPGAAAEAGRR                       |  | -----                                                            |
| 01:9606 7262 0#NP_001793 CDR2 Homo_sapiens        |  | SETILSSLAGSDIVKGHEETCIRRAKAVKQRGISLLHEVDVTQYSALKVKYEELLKKCQEE    |
| 01:9606 7262 NM_001802 CDR2 Homo_sapiens          |  | SETILSSLAGSDIVKGHEETCIRRAKAVKQRGISLLHEVDVTQYSALKVKYEELLKKCQEE    |
| 03:9544 7262 NM_001260929 CDR2 Macaca_mulatta     |  | SETILSSLAGSDIVKGHEETCIRRAKAVKQRGISLLHEVDVTQYSALKVKYEELLKKCQEE    |
| 04:9913 7262 NM_001046383 CDR2 Bos_taurus         |  | SETVLSSLAGSDIVRGHEETCIRRAQAVKQRGISLLHEVDVTQYSALKVKYEELLKKCQEE    |
| 06:10116 7262 NM_001025682 CDR2 Rattus_norvegicus |  | SETVLSSLAGDDIVKDHDHETCIRRAKAVKQRGISLLHEVDVTQYSALKVKYEELLKKCQEE   |

|          |  |      |  |              |  |      |  |                    |                                                              |
|----------|--|------|--|--------------|--|------|--|--------------------|--------------------------------------------------------------|
| 07:10090 |  | 7262 |  | NM_007672    |  | Cdr2 |  | Mus_musculus       | SETALSSLAGDDIVKDHEDTCIRRAKAVKQRGISLLHEVDTQYSALKVKYEELLKKCQQE |
| 08:9031  |  | 7262 |  | NM_001030642 |  | CDR2 |  | Gallus_gallus      | SENFLLSSAAGDILRGHEETCIRRAEAVKQRGISVLNEVDAQYNALKVKYEELLKKCQID |
| 09:8364  |  | 7262 |  | NM_001005649 |  | cdr2 |  | Xenopus_tropicalis | SEMLLPVAAETILNGHEETCIRRAEATKQRGISLLNEVDSQYSALKVKYEELLQKCQLD  |

|          |  |                                           |                                                               |
|----------|--|-------------------------------------------|---------------------------------------------------------------|
| 00:1     |  | Ac-AEGGGAGEEPGAAAEAGRR                    | -----                                                         |
| 01:9606  |  | 7262 0#NP_001793 CDR2 Homo_sapiens        | QDSLSHKAVQTSRAAAKDLTGVNAQSEPVASGWELASVNPEPVSSPT--TPPEYKALFKE  |
| 01:9606  |  | 7262 NM_001802 CDR2 Homo_sapiens          | QDSLSHKAVQTSRAAAKDLTGVNAQSEPVASGWELASVNPEPVSSPT--TPPEYKALFKE  |
| 03:9544  |  | 7262 NM_001260929 CDR2 Macaca_mulatta     | QDSLSHKAVQTSRAPAKDLTGVNAQSEPVASGWELASVNPEPVSSPT--TPPEYKALFKE  |
| 04:9913  |  | 7262 NM_001046383 CDR2 Bos_taurus         | EDSLSHKAVQTSRAPAKDLAALNAQRTPTSLSWVPASVTPEPISSTTTSTPPEYKALFKE  |
| 06:10116 |  | 7262 NM_001025682 Cdr2 Rattus_norvegicus  | QDSLSHKAVQTSRLLTRDLTGVLVPQSEAGASGWEPTPVSPPEISSPTT-TPPEYKALFKE |
| 07:10090 |  | 7262 NM_007672 Cdr2 Mus_musculus          | QDSLSHKAVQTSRLLTRDLTGVLVTQSEAGASGWEPTPVSPESISSPTT-TPPEYKALFKE |
| 08:9031  |  | 7262 NM_001030642 CDR2 Gallus_gallus      | EDSLKHKAVQTLKQYSKDSVGNTQYDLS-ANNQ---EFTNAGELLSSTNTLPYKALFKE   |
| 09:8364  |  | 7262 NM_001005649 cdr2 Xenopus_tropicalis | DDGFSQGVQTSKLSQPEGSP-----SKDLEPSSHKPVSAEPQPEYKVLFQE           |

|          |  |                                           |                             |
|----------|--|-------------------------------------------|-----------------------------|
| 00:1     |  | Ac-AEGGGAGEEPGAAAEAGRR                    | -----                       |
| 01:9606  |  | 7262 0#NP_001793 CDR2 Homo_sapiens        | IFSCIKKTKQEIDEQRTKYRSLSSHS- |
| 01:9606  |  | 7262 NM_001802 CDR2 Homo_sapiens          | IFSCIKKTKQEIDEQRTKYRSLSSHS- |
| 03:9544  |  | 7262 NM_001260929 CDR2 Macaca_mulatta     | IFSCIKKTKQEIDEQRTKYRSLSSHS- |
| 04:9913  |  | 7262 NM_001046383 CDR2 Bos_taurus         | IFSCIKKTKQEIDEQRTKYRSLSSHS- |
| 06:10116 |  | 7262 NM_001025682 Cdr2 Rattus_norvegicus  | IFSCIKKTKQEIDEQRTKYPSLSPYS- |
| 07:10090 |  | 7262 NM_007672 Cdr2 Mus_musculus          | IFSCIKKTKQEIDEQRTKYPSLSSYSY |
| 08:9031  |  | 7262 NM_001030642 CDR2 Gallus_gallus      | IFSCIKKTKKEIDEHRSKYKSLSSQP- |
| 09:8364  |  | 7262 NM_001005649 cdr2 Xenopus_tropicalis | IFTCIKKTKKEIHEQRTKYKYSNAASS |

*MAF*

Ac-AHPLATQHSPLAPLLQPIWR

CLUSTAL O(1.2.1) multiple sequence alignment

|                                                |                                                               |
|------------------------------------------------|---------------------------------------------------------------|
| 00:1 Ac-AHPLATQHSPLAPLLQPIWR                   | -----AHPLATQHSPLAPLLQPIWR-----                                |
| 01:9606 74552 0#NP_001026974 MAF Homo_sapiens  | -----                                                         |
| 01:9606 74552 0#NP_005351 MAF Homo_sapiens     | -----                                                         |
| 01:9606 74552 NM_001031804 MAF Homo_sapiens    | -----ARSEVSGQPPPRKLEAPQPGKLAHPLATQHSPLAPLLQPIWRSGGGG-GGGGRR   |
| 01:9606 74552 NM_005360 MAF Homo_sapiens       | -----ARSEVSGQPPPRKLEAPQPGKLAHPLATQHSPLAPLLQPIWRSGGG-GGGGRR    |
| 04:9913 74552 NM_001105637 MAF Bos_taurus      | -----RSEVSGQPPPRELEAPQPGKLAHPLATQHSPLAPLLQPIWRSGGGGGGGGRR     |
| 06:10116 74552 NM_019318 Maf Rattus_norvegicus | AGRGVCARSSFRATATAARARSALARQAGSPAGRPAQFAGP--SPAHLAEAGGGGGGRR   |
| 07:10090 74552 NM_001025577 Maf Mus_musculus   | -----GGGGGGGRR                                                |
| 00:1 Ac-AHPLATQHSPLAPLLQPIWR                   | -----                                                         |
| 01:9606 74552 0#NP_001026974 MAF Homo_sapiens  | MASELAMNSNDLPTSPLAMEYVNDFDLMKFEVKKEPVETDRIISQCGRLIAGGSLSSTPM  |
| 01:9606 74552 0#NP_005351 MAF Homo_sapiens     | MASELAMNSNDLPTSPLAMEYVNDFDLMKFEVKKEPVETDRIISQCGRLIAGGSLSSTPM  |
| 01:9606 74552 NM_001031804 MAF Homo_sapiens    | MASELAMNSNDLPTSPLAMEYVNDFDLMKFEVKKEPVETDRIISQCGRLIAGGSLSSTPM  |
| 01:9606 74552 NM_005360 MAF Homo_sapiens       | MASELAMNSNDLPTSPLAMEYVNDFDLMKFEVKKEPVETDRIISQCGRLIAGGSLSSTPM  |
| 04:9913 74552 NM_001105637 MAF Bos_taurus      | MASELAMNSNDLPTSPLAMEYVNDFDLMKFEVKKEPVETDRIISQCGRLIAGGSLSSTPM  |
| 06:10116 74552 NM_019318 Maf Rattus_norvegicus | MASELAMNNSDLPTSPLAMEYVNDFDLMKFEVKKEPVETDRIISQCGRLIAGGSLSSTPM  |
| 07:10090 74552 NM_001025577 Maf Mus_musculus   | MASELAMNNSDLPTSPLAMEYVNDFDLMKFEVKKEPVETDRIISQCGRLIAGGSLSSTPM  |
| 00:1 Ac-AHPLATQHSPLAPLLQPIWR                   | -----                                                         |
| 01:9606 74552 0#NP_001026974 MAF Homo_sapiens  | STPCSSVPPSPSFSAPSPGSGSEQKAHLEDYYWMTGYPQQLNPEALGFSPEDAVALISN   |
| 01:9606 74552 0#NP_005351 MAF Homo_sapiens     | STPCSSVPPSPSFSAPSPGSGSEQKAHLEDYYWMTGYPQQLNPEALGFSPEDAVALISN   |
| 01:9606 74552 NM_001031804 MAF Homo_sapiens    | STPCSSVPPSPSFSAPSPGSGSEQKAHLEDYYWMTGYPQQLNPEALGFSPEDAVALISN   |
| 01:9606 74552 NM_005360 MAF Homo_sapiens       | STPCSSVPPSPSFSAPSPGSGSEQKAHLEDYYWMTGYPQQLNPEALGFSPEDAVALISN   |
| 04:9913 74552 NM_001105637 MAF Bos_taurus      | STPCSSVPPSPSFSAPSPGSGSEQKAHLEDYYWMTGYPQQLNPEALGFSPEDAVALISN   |
| 06:10116 74552 NM_019318 Maf Rattus_norvegicus | STPCSSVPPSPSFSAPSPGSGSEQKAHLEDYYWMTGYPQQLNPEALGFSPEDAVALISN   |
| 07:10090 74552 NM_001025577 Maf Mus_musculus   | STPCSSVPPSPSFSAPSPGSGSEQKAHLEDYYWMTGYPQQLNPEALGFSPEDAVALISN   |
| 00:1 Ac-AHPLATQHSPLAPLLQPIWR                   | -----                                                         |
| 01:9606 74552 0#NP_001026974 MAF Homo_sapiens  | SHQLQGGFDGYARGAQQLAAAAGAGAGASLGGSGEEMGPAAAVVSAVIAAAAAQSGAGPH  |
| 01:9606 74552 0#NP_005351 MAF Homo_sapiens     | SHQLQGGFDGYARGAQQLAAAAGAGAGASLGGSGEEMGPAAAVVSAVIAAAAAQSGAGPH  |
| 01:9606 74552 NM_001031804 MAF Homo_sapiens    | SHQLQGGFDGYARGAQQLAAAAGAGAGASLGGSGEEMGPAAAVVSAVIAAAAAQSGAGPH  |
| 01:9606 74552 NM_005360 MAF Homo_sapiens       | SHQLQGGFDGYARGAQQLAAAAGAGAGASLGGSGEEMGPAAAVVSAVIAAAAAQSGAGPH  |
| 04:9913 74552 NM_001105637 MAF Bos_taurus      | SHQLQGGFDGYARGAQQLASAAGAGAGASLGGSGEEMGPAAAVVSAVIAAAAAQSGAAPH  |
| 06:10116 74552 NM_019318 Maf Rattus_norvegicus | SHQLQGGFDGYARGAQQLAAAAGAGAGASLGGSGEEMGPAAAVVSAVIAAAAAQSGGAPH  |
| 07:10090 74552 NM_001025577 Maf Mus_musculus   | SHQLQGGFDGYARGAQQLAAAAGAGAGASLGGSGEEMGPAAAVVSAVIAAAAAQSGAAPH  |
| 00:1 Ac-AHPLATQHSPLAPLLQPIWR                   | -----                                                         |
| 01:9606 74552 0#NP_001026974 MAF Homo_sapiens  | YH--HHHHHAAGHHHHHTAGAPGAAGSAAASAGGAGGAGGG--GPASAGGGGGGGGGGG   |
| 01:9606 74552 0#NP_005351 MAF Homo_sapiens     | YHH--HHHHHAAGHHHHHTAGAPGAAGSAAASAGGAGGAGGG--GPASAGGGGGGGGGGG  |
| 01:9606 74552 NM_001031804 MAF Homo_sapiens    | YH--HHHHHAAGHHHHHTAGAPGAAGSAAASAGGAGGAGGG--GPASAGGGGGGGGGGG   |
| 01:9606 74552 NM_005360 MAF Homo_sapiens       | YHH--HHHHHAAGHHHHHTAGAPGAAGSAAASAGGAGGAGGG--GPASAGGGGGGGGGGG  |
| 04:9913 74552 NM_001105637 MAF Bos_taurus      | YHHHHHHHAAGHHHHHTAGAPGAAGSASASAGGAGSGGGSGPSAGGG--GGGGGGG      |
| 06:10116 74552 NM_019318 Maf Rattus_norvegicus | YH--HHHHHATGHHHHHTAGAPGAAGSASASAGGAGGAGGG--GPASAGGG---GGGGG   |
| 07:10090 74552 NM_001025577 Maf Mus_musculus   | YH--HHHHHAAGHHHHHTAGAPGAAGGASASASAGGAGGAGGG--GPASAGGG---GGGGG |
| 00:1 Ac-AHPLATQHSPLAPLLQPIWR                   | -----                                                         |
| 01:9606 74552 0#NP_001026974 MAF Homo_sapiens  | GGAAGAGGALHPHHA-AGGLHFDDRFSDEQLVTMSVRELNRQLRGVSKEEVIRLKQKRRT  |
| 01:9606 74552 0#NP_005351 MAF Homo_sapiens     | GGAAGAGGALHPHHA-AGGLHFDDRFSDEQLVTMSVRELNRQLRGVSKEEVIRLKQKRRT  |
| 01:9606 74552 NM_001031804 MAF Homo_sapiens    | GGAAGAGGALHPHHA-AGGLHFDDRFSDEQLVTMSVRELNRQLRGVSKEEVIRLKQKRRT  |
| 01:9606 74552 NM_005360 MAF Homo_sapiens       | GGAAGAGGALHPHHA-AGGLHFDDRFSDEQLVTMSVRELNRQLRGVSKEEVIRLKQKRRT  |
| 04:9913 74552 NM_001105637 MAF Bos_taurus      | GGAAGAGGALHPHHAAGGLHFDDRFSDEQLVTMSVRELNRQLRGVSKEEVIRLKQKRRT   |
| 06:10116 74552 NM_019318 Maf Rattus_norvegicus | GGTAGAGGALHPHHA-AGGLHFDDRFSDEQLVTMSVRELNRQLRGVSKEEVIRLKQKRRT  |
| 07:10090 74552 NM_001025577 Maf Mus_musculus   | GGTAGAGGALHPHHA-AGGLHFDDRFSDEQLVTMSVRELNRQLRGVSKEEVIRLKQKRRT  |
| 00:1 Ac-AHPLATQHSPLAPLLQPIWR                   | -----                                                         |
| 01:9606 74552 0#NP_001026974 MAF Homo_sapiens  | LKNRGYAQSCRFRKRVQQRHVLESEKNQLLQQVDHLKQEISRLVRERDAYKEYEKLVS    |
| 01:9606 74552 0#NP_005351 MAF Homo_sapiens     | LKNRGYAQSCRFRKRVQQRHVLESEKNQLLQQVDHLKQEISRLVRERDAYKEYEKLVS    |
| 01:9606 74552 NM_001031804 MAF Homo_sapiens    | LKNRGYAQSCRFRKRVQQRHVLESEKNQLLQQVDHLKQEISRLVRERDAYKEYEKLVS    |
| 01:9606 74552 NM_005360 MAF Homo_sapiens       | LKNRGYAQSCRFRKRVQQRHVLESEKNQLLQQVDHLKQEISRLVRERDAYKEYEKLVS    |
| 04:9913 74552 NM_001105637 MAF Bos_taurus      | LKNRGYAQSCRFRKRVQQRHVLESEKNQLLQQVDHLKQEISRLVRERDAYKEYEKLVS    |
| 06:10116 74552 NM_019318 Maf Rattus_norvegicus | LKNRGYAQSCRFRKRVQQRHVLESEKNQLLQQVDHLKQEISRLVRERDAYKEYEKLVS    |
| 07:10090 74552 NM_001025577 Maf Mus_musculus   | LKNRGYAQSCRFRKRVQQRHVLESEKNQLLQQVDHLKQEISRLVRERDAYKEYEKLVS    |
| 00:1 Ac-AHPLATQHSPLAPLLQPIWR                   | -----                                                         |
| 01:9606 74552 0#NP_001026974 MAF Homo_sapiens  | FRENGSSSDNPSSPEFFM-----                                       |
| 01:9606 74552 0#NP_005351 MAF Homo_sapiens     | FRENGSSSDNPSSPEFFITEPTRKLEPSVGATFWKPQHRVLTSVFTK               |
| 01:9606 74552 NM_001031804 MAF Homo_sapiens    | FRENGSSSDNPSSPEFFM-----                                       |
| 01:9606 74552 NM_005360 MAF Homo_sapiens       | FRENGSSSDNPSSPEFFITEPTRKLEPSVGATFWKPQHRVLTSVFTK               |
| 04:9913 74552 NM_001105637 MAF Bos_taurus      | FRENGSSSDNPSSPEFFM-----                                       |
| 06:10116 74552 NM_019318 Maf Rattus_norvegicus | FRENCSSSDNPSSPEFFM-----                                       |
| 07:10090 74552 NM_001025577 Maf Mus_musculus   | FRENGSSSDNPSSPEFFM-----                                       |

***HNRNPAB***

Ac-SAAEPAAPSPAGGDER

```
00:1|Ac-SAAEPAPSPAGGDER
01:9606|74950|0#NP_004490|HNRNPAB|Homo_sapiens
01:9606|74950|0#NP_112556|HNRNPAB|Homo_sapiens
01:9606|74950|NM_004499|HNRNPAB|Homo_sapiens
01:9606|74950|NM_031266|HNRNPAB|Homo_sapiens
03:9544|74950|NM_001257812|HNRNPAB|Macaca_mulatta
04:9913|74950|NM_001040522|HNRNPAB|Bos_taurus
07:10090|74950|NM_001048061|Hnrnpab|Mus_musculus
07:10090|74950|NM_010448|Hnrnpab|Mus_musculus
08:9031|74950|NM_205328|HNRNPAB|Gallus_gallus
09:8364|74950|NM_001045771|hnrnpab|Xenopus_tropicalis
10:7955|74950|NM_212587|hnrnpaba|Danio_erio
10:7955|74950|NM_213302|hnrnpabb|Danio_erio
```

```

--SA-- --AEPAA-- --PSPAGGD-ER--
-----
LGRGLSSASLSA-- --AEPAA-- --PSPAGGD-ERAPRRHRRRGAA--
LGRGLSSASLSA-- --AEPAA-- --PSPAGGD-ERAPRRHRRRGAA--
LGRGLSSASLSA-- --AEPAA-- --PSPAGGD-ERAPRRHRRRGAA--
--ARPSP-- --RCLLGWGRAGPAASSAARSR--
--GLLYRQCTAAAEERSDSQWLRTSPRGCDRDRGQARASPSAASRASRRHRRRVAA--
--GLLYRQCTAAAEERSDSQWLRTSPRGCDRDRGQARASPSAASRASRRHRRRVAA--
--SRLCG--
-----
--LFTCC-- --CYVF-- --RFS--
-----
--ESGSAPIF--

```

```
00:1|Ac-SAAEPAPSPAGGDER
01:9606|74950|0#NP_004490|HNRNPAB|Homo_sapiens
01:9606|74950|0#NP_112556|HNRNPAB|Homo_sapiens
01:9606|74950|NM_004499|HNRNPAB|Homo_sapiens
01:9606|74950|NM_031266|HNRNPAB|Homo_sapiens
03:9544|74950|NM_001257812|HNRNPAB|Macaca_mulatta
04:9913|74950|NM_001040522|HNRNPAB|Bos_taurus
07:10090|74950|NM_001048061|hnrnpab|Mus_musculus
07:10090|74950|NM_010448|hnrnpab|Mus_musculus
08:9031|74950|NM_205328|HNRNPAB|Gallus_gallus
09:8364|74950|NM_001045771|hnrnpab|Xenopus_tropicalis
10:7955|74950|NM_212587|hnrnpaba|Danio_erio
10:7955|74950|NM_213302|hnrnpabb|Danio_erio
```

```

-----MSEAGEEQPMETTGGATENGHEAVPEG-----ESPAGAG-----TG
-----MSEAGEEQPMETTGGATENGHEAVPEG-----ESPAGAG-----TG
APRPSMSEAGEEQPMETTGGATENGHEAVPEG-----ESPAGAG-----TG
APRPSMSEAGEEQPMETTGGATENGHEAVPEG-----ESPAGAG-----TG
APRPSMSEAGEEQPMETTGGATENGHEAAPEG-----ESPAGAG-----TG
APRPSMSEAGEEQPMETTGGATENGHEAAPEG-----ESPAGTG-----TG
AAWPTMSDAAEEQPMETTGGATENGHEAAPEG-----EAPVEPSAA-----AAAPA
AAWPTMSDAAEEQPMETTGGATENGHEAAPEG-----EAPVEPSAA-----AAAPA
--RGSMSSEA--EQQLAAAAGATQNGHEAAESSGEQQQADTGGAASGAATAAAATAGTA
-KPLTMSDTEQQQYME--TGTENGHEACD--
HLTTMSDA-EQQYMETSL---NGHEGEDDLNGAGQYDQNGDA--
YSDPNLLKMADEQFMETSE---NGNEE

```

```
00:1|Ac-SAAEPAPSPAGGDER
01:9606|74950|0#NP_004490|HNRNPAB|Homo_sapiens
01:9606|74950|0#NP_112556|HNRNPAB|Homo_sapiens
01:9606|74950|NM_004499|HNRNPAB|Homo_sapiens
01:9606|74950|NM_031266|HNRNPAB|Homo_sapiens
03:9544|74950|NM_001257812|HNRNPAB|Macaca_mulatta
04:9913|74950|NM_001040522|HNRNPAB|Bos_taurus
07:10090|74950|NM_001048061|hnrnpab|Mus_musculus
07:10090|74950|NM_010448|hnrnpab|Mus_musculus
08:9031|74950|NM_205328|HNRNPAB|Gallus_gallus
09:8364|74950|NM_001045771|hnrnpab|Xenopus_tropicalis
10:7955|74950|NM_212587|hnrnpaba|Danio_erio
10:7955|74950|NM_213302|hnrnpabb|Danio_erio
```

AAAGAGG-ATAAPPSGNQNGAEGDQINASKNEEDAGKMFVGGLSWDTSKKDLKDYFTKFG  
AAAGAGG-ATAAPPSGNQNGAEGDQINASKNEEDAGKMFVGGLSWDTSKKDLKDYFTKFG  
AAAGAGG-ATAAPPSGNQNGAEGDQINASKNEEDAGKMFVGGLSWDTSKKDLKDYFTKFG  
AAAGAGG-ATAAPPSGNQNGAEGDQINASKNEEDAGKMFVGGLSWDTSKKDLKDYFTKFG  
ATAGAGG-ATAAPPSGNQNGAEGDQINASKNEEDAGKMFVGGLSWDTSKKDLKDYFTKFG  
VAAGAGG-GSAAPQAGNQNGAEGDQINASKNEEDAGKMFVGGLSWDTSKKDLKDYFTKFG  
ASAGSGG-GTTTAPPSGNQNGAEGDQINASKNEEDAGKMFVGGLSWDTSKKDLKDYFTKFG  
ASAGSGG-GTTTAPPSGNQNGAEGDQINASKNEEDAGKMFVGGLSWDTSKKDLKDYFTKFG  
AAAGAGPAAGTAGVAASQNGAEGDQINASKNEEDAGKMFVGGLSWDTSKKDLKDYFTKFG  
-----ABAAESKVPGGQNGAEGDQINASKGEEDAGKMFVGGLSWDTSKKDLKDYFSKFG  
-QAGAQNNA-GADGTATGDDGADGGQINASKGEEDAGKMFVGGLSWDTSKKDLKDYFSKFG  
-----NLNNGEAAGENGAGBGLQIDASKCEEDAGKMFVGGLSWDTSKKDLKDYFSKFG

```
00:1|Ac-SAAEPAAPSPAGGDER
01:9606|74950|0#NP_004490|HNRNPAB|Homo_sapiens
01:9606|74950|0#NP_112556|HNRNPAB|Homo_sapiens
01:9606|74950|NM_004499|HNRNPAB|Homo_sapiens
01:9606|74950|NM_031266|HNRNPAB|Homo_sapiens
03:9544|74950|NM_001257812|HNRNPAB|Macaca_mulatta
04:9913|74950|NM_001040522|HNRNPAB|Bos_taurus
07:10090|74950|NM_001048061|hnrnpab|Mus_musculus
07:10090|74950|NM_010448|hnrnpab|Mus_musculus
08:9031|74950|NM_205328|HNRNPAB|Gallus_gallus
09:8364|74950|NM_001045771|hnrnpab|Xenopus_tropicalis
10:7955|74950|NM_212587|hnrnpaba|Danio_erio
10:7955|74950|NM_213302|hnrnpabb|Danio_erio
```

EVVVDCTIKMDPNTGRSRGFGFILFKDAASVEKVLQDQKEHRLDGRVIDPKKAMAMKKDPVK  
EVVVDCTIKMDPNTGRSRGFGFILFKDAASVEKVLQDQKEHRLDGRVIDPKKAMAMKKDPVK  
EVVVDCTIKMDPNTGRSRGFGFILFKDAASVEKVLQDQKEHRLDGRVIDPKKAMAMKKDPVK  
EVVVDCTIKMDPNTGRSRGFGFILFKDAASVEKVLQDQKEHRLDGRVIDPKKAMAMKKDPVK  
EVVVDCTIKMDPNTGRSRGFGFILFKDAASVEKVLQDQKEHRLDGRVIDPKKAMAMKKDPVK  
EVVVDCTIKMDPNTGRSRGFGFILFKDASSVEKVLQDQKEHRLDGRVIDPKKAMAMKKDPVK  
EVVVDCTIKMDPNTGRSRGFGFILFKDSSSVEKVLQDQKEHRLDGRVIDPKKAMAMKKDPVK  
EVVVDCTIKMDPNTGRSRGFGFILFKDSSSVEKVLQDQKEHRLDGRVIDPKKAMAMKKDPVK  
EVTDTCTIKMDPNTGRSRGFGFILFKEPGSVEKVLEQKEHRLDGRVIDPKKAMAMKKDPVK  
EVSDDCTIKMDPNTGRSRGFGFILFKDAESPVDKVLQKEHRLDGRVIDPKKAMAMKKDPVK  
EVTDTCTIKMDPNTGRSRGFGFILFKDEPSGVDKLQKEHRLDGRVIDPKKAMAMKKDPVK  
EVMDDCTIKMDSNTGRSRGFGFILFKESDSDRVLQQKEHRLDGRVIDPKRAMATKKEFPVK

```
00:1|Ac-SAAEPAAPSPAGGDER
01:9606|74950|0#NP_004490|HNRNPAB|Homo_sapiens
01:9606|74950|0#NP_112556|HNRNPAB|Homo_sapiens
01:9606|74950|NM_004499|HNRNPAB|Homo_sapiens
01:9606|74950|NM_031266|HNRNPAB|Homo_sapiens
03:9544|74950|NM_001257812|HNRNPAB|Macaca_mulatta
04:9913|74950|NM_001040522|HNRNPAB|Bos_taurus
07:10090|74950|NM_001048061|Hnrnpab|Mus_musculus
07:10090|74950|NM_010448|Hnrnpab|Mus_musculus
08:9031|74950|NM_205328|HNRNPAB|Gallus_gallus
09:8364|74950|NM_001045771|hnrnpab|Xenopus_tropicalis
10:7955|74950|NM_212587|hnrnpaba|Danio_erio
10:7955|74950|NM_213302|hnrnpabb|Danio_erio
```

KIFVGGGLNPEATEEEKIREYFGFGEIEAIELPMDPKLNKRRGVFVITFKEEPEVKKVLEK  
KIFVGGGLNPEATEEEKIREYFGFGEIEAIELPMDPKLNKRRGVFVITFKEEPEVKKVLEK  
KIFVGGGLNPEATEEEKIREYFGFGEIEAIELPMDPKLNKRRGVFVITFKEEPEVKKVLEK  
KIFVGGGLNPEATEEEKIREYFGFGEIEAIELPMDPKLNKRRGVFVITFKEEPEVKKVLEK  
KIFVGGGLNPEATEEEKIREYFGFGEIEAIELPMDPKLNKRRGVFVITFKEEPEVKKVLEK  
KIFVGGGLNPEATEEEKIREYFGFGEIEAIELPMDPKLNKRRGVFVITFKEEPEVKKVLEK  
KIFVGGGLNPEATEEEKIREYFGGFGIEAIELPIDPKLNKRRGVFVITFKEEDPVKKVLEK  
KIFVGGGLNPEATEEEKIREYFGFGEIEAIELPMDPKLNKRRGVFVITFKEEDPVKKVLEK  
KIFVGGGLNPEATEEEKIREYFGFGEIEAIELPMDPKLNKRRGVFVITFKEEDPVKKVLEK  
KIFVGGGLNPEAGEDKIREYFFTFGEIEAIELPMDPKLNKRRGVFVITFKEEPEVKKVLEK  
KIFVGGGLNPETTEERIREYFGAFGEIEAIELPMDPKSNKRRGVFVITFKEEPAVKKVLEK  
KIFVGGGLNPETTEEKIREYFGSFGIEETIELPTDPTSKRRGVFVITFKEEPAVKKVLEK

```
00:1|Ac-SAAEPAPSPAGGDER
01:9606|74950|0#NP_004490|HNRNPAB|Homo_sapiens
01:9606|74950|0#NP_125256|HNRNPAB|Homo_sapiens
01:9606|74950|NM_004499|HNRNPAB|Homo_sapiens
01:9606|74950|NM_031266|HNRNPAB|Homo_sapiens
03:9544|74950|NM_001257812|HNRNPAB|Macaca_mulatta
04:9913|74950|NM_001040522|HNRNPAB|Bos_taurus
07:10090|74950|NM_001048061|Hnrnpab|Mus_musculus
```

KFHTVSGS-----KCEIKVAQPKEVYQQQYGSGGGRGNRRNRRNRRSGSGGGGGGGGGQ--  
 KFHTVSGS-----KCEIKVAQPKEVYQQQYGSGGGRGNRRNRRNRRSGSGGGGGGGGGQSQ  
 KFHTVSGS-----KCEIKVAQPKEVYQQQYGSGGGRGNRRNRRNRRSGSGGGGGGGGGQ--  
 KFHTVSGS-----KCEIKVAQPKEVYQQQYGSGGGRGNRRNRRNRRSGSGGGGGGGGGQSQ  
 KFHTISGS-----KCEIKVAQPKEVYQQQYGSGGGRGNRRNRRNRRSGSGGGGGGGGGQSQ  
 KFHTISGS-----KCEIKVAQPKEVYQQQYGSGGGRGNRRNRRNRRSGSGGGGGGGGSQ--  
 KFHTVSGS-----KCEIKVAQPKEVYQQQYGSGGGRGNRRNRRNRRSG-----GGQSQ

07:10090|74950|NM\_010448|Hnrnpab|Mus\_musculus  
08:9031|74950|NM\_205328|HNRNPAB|Gallus\_gallus  
09:8364|74950|NM\_001045771|hnrnpab|Xenopus\_tropicalis  
10:7955|74950|NM\_212587|hnrnpaba|Danio\_rerio  
10:7955|74950|NM\_213302|hnrnpabb|Danio\_rerio

KFHTVSGS-----KCEIKVAQPKEVYQQQQYGS GGRGNRNRGNSG-----GGQ--  
KFHNVSGS-----KCEIKVAQPKEVYQQQFSSGGGRGS-YGGRGRGGRG-----  
KFHNVSGS-----KCEIKIAQPKEVYQQQYGGRGGS-----FGGRGGRGGAQGG  
KYHNVSGTKDTSKGKGLCEIKIAQPKEVYQQQQYGGFRG-----GGGRGRGGGGQ  
KYHNVCGS-----KCEIKIAQPKEIYQQQFARGGG-----FGGRGRGGGPGQ

00:1|Ac-SAAEPAAPSPAGGDER  
01:9606|74950|0#NP\_004490|HNRNPAB|Homo\_sapiens  
01:9606|74950|0#NP\_112556|HNRNPAB|Homo\_sapiens  
01:9606|74950|NM\_004499|HNRNPAB|Homo\_sapiens  
01:9606|74950|NM\_031266|HNRNPAB|Homo\_sapiens  
03:9544|74950|NM\_001257812|HNRNPAB|Macaca\_mulatta  
04:9913|74950|NM\_001040522|HNRNPAB|Bos\_taurus  
07:10090|74950|NM\_001048061|Hnrnpab|Mus\_musculus  
07:10090|74950|NM\_010448|Hnrnpab|Mus\_musculus  
08:9031|74950|NM\_205328|HNRNPAB|Gallus\_gallus  
09:8364|74950|NM\_001045771|hnrnpab|Xenopus\_tropicalis  
10:7955|74950|NM\_212587|hnrnpaba|Danio\_rerio  
10:7955|74950|NM\_213302|hnrnpabb|Danio\_rerio

-----GSTN  
SWNQGYGNYWNGYGYQQ-----GYGPGYGGYDYSPTYGYGYGPGYDYS-QGSTN  
-----GSTN  
SWNQGYGNYWNGYGYQQ-----GYGPGYGGYDYSPTYGYGYGPGYDYS-QGSTN  
SWNQGYGNYWNGYGYQQ-----GYGPGYGGYDYSPTYGYGYGPGYDYS-QGSTN  
-----QGSTN  
SWNQGYGNYWNGYGYQQ-----GYGPGYGGYDYSPTYGYGYGPGYDYS-QGSTN  
-----GSTN  
-----GG-QGSAN  
NWNQGYNSYWNQGYGNQGYGGYQ---QGYGGYGNYSYGYGYGPGYDYS-QGSAN  
NWNQGYNNYWNQGYGNQGYGGYGGQGYGGYGGYGNYSYGYGYGPGYDYS-QGNTS  
SWNQGYNNYWNQGYGGQGY-GYGGQGYGGYGGYGNYSYGYGYGPGYDYS-QGNTS

00:1|Ac-SAAEPAAPSPAGGDER  
01:9606|74950|0#NP\_004490|HNRNPAB|Homo\_sapiens  
01:9606|74950|0#NP\_112556|HNRNPAB|Homo\_sapiens  
01:9606|74950|NM\_004499|HNRNPAB|Homo\_sapiens  
01:9606|74950|NM\_031266|HNRNPAB|Homo\_sapiens  
03:9544|74950|NM\_001257812|HNRNPAB|Macaca\_mulatta  
04:9913|74950|NM\_001040522|HNRNPAB|Bos\_taurus  
07:10090|74950|NM\_001048061|Hnrnpab|Mus\_musculus  
07:10090|74950|NM\_010448|Hnrnpab|Mus\_musculus  
08:9031|74950|NM\_205328|HNRNPAB|Gallus\_gallus  
09:8364|74950|NM\_001045771|hnrnpab|Xenopus\_tropicalis  
10:7955|74950|NM\_212587|hnrnpaba|Danio\_rerio  
10:7955|74950|NM\_213302|hnrnpabb|Danio\_rerio

-----  
YGKSQRRGGHQNNYKPY  
YGKSQRRGGHQNNYKPY  
YGKSQRRGGHQNNYKPY  
YGKSQRRGGHQNNYKPY  
YGKSQRRGGHQNNYKPY  
YGKSQRRGGHQNNYKPY  
YGKSQRRGGHQNNYKPY  
YGKSQRRGGHQNNYKPY  
YGKTPRRGGHQNNYKPY  
YGKAPRRGSHQSNYKPY  
YGKTPRRGAHQSSYKPY  
YGKTPRRGGHQSGYKPY

*CNP*

Ac-MVPAEAATVAPLLIMNR

CLUSTAL O(1.2.1) multiple sequence alignment

|                                               |                                                               |
|-----------------------------------------------|---------------------------------------------------------------|
| 00:1 Ac-MVPAEAATVAPLLIMNR                     | -----MVPAEAATVAPLLIMNR-----                                   |
| 01:9606 7672 0#NP_149124 CNP Homo_sapiens     | -----MNRGFSRKSHT                                              |
| 01:9606 7672 NM_033133 CNP Homo_sapiens       | GCPLRPPGYVKRPGSG-RATAGLPCPSAQAGGPGALVPAEAAATVAPLLIMNRGFSRKSHT |
| 03:9544 7672 NM_001035528 CNP Macaca_mulatta  | -----MNRGFSRKSHT                                              |
| 04:9913 7672 NM_180993 CNP Bos_taurus         | -----SRGFSRKSQT                                               |
| 06:10116 7672 NM_012809 Cnp Rattus_norvegicus | -----PVSLAQAGGPGDIVPAKAVTAVRPLIMSTSFARKSHT                    |
| 07:10090 7672 NM_001146318 Cnp Mus_musculus   | -----GAG-----ADISSLLTQNTSFTRKSH                               |
| 07:10090 7672 NM_009923 Cnp Mus_musculus      | -----GYERDPAWGGPGHPETPVSLTQAGGPGDIVPAKAVTAVRPLIMNTSFTRKSH     |
| 08:9031 7672 NM_205050 CNP Gallus_gallus      | -----SRSAPGGRP-----GAAALTMNRGFSKKSH                           |
| 00:1 Ac-MVPAEAATVAPLLIMNR                     | -----                                                         |
| 01:9606 7672 0#NP_149124 CNP Homo_sapiens     | FLPKIFFFRKMSSSGAKD-KPELQFPFLQDEDTVATLLECKTLFILRGLPGSGKSTLARVI |
| 01:9606 7672 NM_033133 CNP Homo_sapiens       | FLPKIFFFRKMSSSGAKD-KPELQFPFLQDEDTVATLLECKTLFILRGLPGSGKSTLARVI |
| 03:9544 7672 NM_001035528 CNP Macaca_mulatta  | FLPKIFFFRKMSSSGAKD-KPELQFPFLQDEDTVATLLECKTLFILRGLPGSGKSTLARAI |
| 04:9913 7672 NM_180993 CNP Bos_taurus         | FLPKVFFFRKMSSSGAKD-KPELQFPFLQDEDTVATLLECKTLFILRGLPGSGKSTLARFI |
| 06:10116 7672 NM_012809 Cnp Rattus_norvegicus | FLPKIFFFRKMSSSGAKD-KPELQFPFLQDEDTVATLHECKTLFILRGLPGSGKSTLARLI |
| 07:10090 7672 NM_001146318 Cnp Mus_musculus   | FLPKLFFFRKMSSSGAKE-KPELQFPFLQDEDTVATLHECKTLFILRGLPGSGKSTLARLI |
| 07:10090 7672 NM_009923 Cnp Mus_musculus      | FLPKLFFFRKMSSSGAKE-KPELQFPFLQDEDTVATLHECKTLFILRGLPGSGKSTLARLI |
| 08:9031 7672 NM_205050 CNP Gallus_gallus      | FLPKIFR-KMSAQAAKERPDSLRFPLDDEETIATLRESKTFILRGLPGSGKSTLAQAI    |
| 00:1 Ac-MVPAEAATVAPLLIMNR                     | -----                                                         |
| 01:9606 7672 0#NP_149124 CNP Homo_sapiens     | VDKYRDGTMKMSADAYKITPGARGAFSEEEKRLDEDLAAYCRRRDIRILVLDDTNHERER  |
| 01:9606 7672 NM_033133 CNP Homo_sapiens       | VDKYRDGTMKMSADAYKITPGARGAFSEEEKRLDEDLAAYCRRRDIRILVLDDTNHERER  |
| 03:9544 7672 NM_001035528 CNP Macaca_mulatta  | VDKYRDGTMKMSADAYKITPGARGAFSEEEKRLDEDLAAYCRRRDIRILVLDDTNHERER  |
| 04:9913 7672 NM_180993 CNP Bos_taurus         | VDKYRDGTMKMSADSYKITPGARGSFSEEEKQLDEDLAACC-RRDRVLVLDTNHERER    |
| 06:10116 7672 NM_012809 Cnp Rattus_norvegicus | VEKYHNGTMKMSADAYKIIPGSRADFSEEEKRLDEDLAGYC-RRDIRVLVLDTNHERER   |
| 07:10090 7672 NM_001146318 Cnp Mus_musculus   | LEKYHDGTMKMSADAYKIIPGSRADFSEAYKRLDEDLAGYC-RRDIRVLVLDTNHERER   |
| 07:10090 7672 NM_009923 Cnp Mus_musculus      | LEKYHDGTMKMSADAYKIIPGSRADFSEAYKRLDEDLAGYC-RRDIRVLVLDTNHERER   |
| 08:9031 7672 NM_205050 CNP Gallus_gallus      | QERYRDGCKVIAAENYKITPAVRSGVPPEYGVDEDLVEYC-KRDVSVIVLDDTHHERER   |
| 00:1 Ac-MVPAEAATVAPLLIMNR                     | -----                                                         |
| 01:9606 7672 0#NP_149124 CNP Homo_sapiens     | LEQLFEMADQYQYQVVLVEPKTAWRLDCAQLKEKNQWQLSADDLKKLPGLEKDFLPLYF   |
| 01:9606 7672 NM_033133 CNP Homo_sapiens       | LEQLFEMADQYQYQVVLVEPKTAWRLDCAQLKEKNQWQLSADDLKKLPGLEKDFLPLYF   |
| 03:9544 7672 NM_001035528 CNP Macaca_mulatta  | LEQLFEMADQYQYQVVLVEPKTAWRLDCAQLKEKNQWQLSADDLKKLPGLEKDFLPLYF   |
| 04:9913 7672 NM_180993 CNP Bos_taurus         | LEQLFELADQYQYQVVLVEPKTAWRLDCAQLKEKNQWQLSADDLKKLPGLEKDFLPLYF   |
| 06:10116 7672 NM_012809 Cnp Rattus_norvegicus | LDQLFEMADQYQYQVVLVEPKTAWRLDCAQLKEKNQWQLSDDLKKLPGLEKDFLPLYF    |
| 07:10090 7672 NM_001146318 Cnp Mus_musculus   | LDQLFEMADQYQYQVVLVEPKTAWRLDCAQLKEKNQWQLSADDLKKLPGLEKDFLPLYF   |
| 07:10090 7672 NM_009923 Cnp Mus_musculus      | LDQLFEMADQYQYQVVLVEPKTAWRLDCAQLKEKNQWQLSADDLKKLPGLEKDFLPLYF   |
| 08:9031 7672 NM_205050 CNP Gallus_gallus      | LDQIFDIADKYKYKIVFAEPKTQWRMDCAQLKDNQWKLTAEDLKKMKPSLEKEFLPMYF   |
| 00:1 Ac-MVPAEAATVAPLLIMNR                     | -----                                                         |
| 01:9606 7672 0#NP_149124 CNP Homo_sapiens     | GWFLTKKSSETLRKAGQVFLEELGNHKAFKKELRQFVPGDEPREKMDLVTYFGKRPPGVL  |
| 01:9606 7672 NM_033133 CNP Homo_sapiens       | GWFLTKKSSETLRKAGQVFLEELGNHKAFKKELRQFVPGDEPREKMDLVTYFGKRPPGVL  |
| 03:9544 7672 NM_001035528 CNP Macaca_mulatta  | GWFLSKKSSEILRKAGQVFLEELGNHKAFKKELRQFVPGDEPREKMDLVTYFGKRPPGVL  |
| 04:9913 7672 NM_180993 CNP Bos_taurus         | GWFLTKKSSAALWKTGQTFLEELGNHKAFKKELRHFVSGDEPREKIELVTYFGKRPPGVL  |
| 06:10116 7672 NM_012809 Cnp Rattus_norvegicus | GWFLTKKSSETLRKAGQVFLEELGNHKAFKKELRHFISGDEPKEKLDLVSYFGKRPPGVL  |
| 07:10090 7672 NM_001146318 Cnp Mus_musculus   | GWFLTKKSSETLRKAGQVFLEELGNHKAFKKELRHFISGDEPKEKLELVSYFGKRPPGVL  |
| 07:10090 7672 NM_009923 Cnp Mus_musculus      | GWFLTKKSSETLRKAGQVFLEELGNHKAFKKELRHFISGDEPKEKLELVSYFGKRPPGVL  |
| 08:9031 7672 NM_205050 CNP Gallus_gallus      | GWFLSKRSSEILRKAGQVFLEELGSLKAFKKESKYFT-SEDPKIKIDLTSYFGKRPPGVL  |
| 00:1 Ac-MVPAEAATVAPLLIMNR                     | -----                                                         |
| 01:9606 7672 0#NP_149124 CNP Homo_sapiens     | HCTTKFCDYGKAPGAEEYAQQDVLKKSYSKAFTLTISALFVTPKTTGARVELSEQQLQLW  |
| 01:9606 7672 NM_033133 CNP Homo_sapiens       | HCTTKFCDYGKAPGAEEYAQQDVLKKSYSKAFTLTISALFVTPKTTGARVELSEQQLQLW  |
| 03:9544 7672 NM_001035528 CNP Macaca_mulatta  | HCTTKFCDYGKAPGAEEYAQQDVLKKSYSKAFTLTISALFVTPKTTGARVELSEQQLQLW  |
| 04:9913 7672 NM_180993 CNP Bos_taurus         | HCTTKFCDYGKAAGAEEYAQQDVLKKSYSKAFTLTISALFVTPKTTGARVELSEQQLALW  |
| 06:10116 7672 NM_012809 Cnp Rattus_norvegicus | HCTTKFCDYGKATGAEEYAQQDVVRRSYGKAFKLSISALFVTPKTAGAQVVLNEQELQLW  |
| 07:10090 7672 NM_001146318 Cnp Mus_musculus   | HCTTKFCDYGKAAGAEEYAQQEVVKRSYGKAFKLSISALFVTPKTAGAQVVLTDQELQLW  |
| 07:10090 7672 NM_009923 Cnp Mus_musculus      | HCTTKFCDYGKAAGAEEYAQQEVVKRSYGKAFKLSISALFVTPKTAGAQVVLTDQELQLW  |
| 08:9031 7672 NM_205050 CNP Gallus_gallus      | HCTTKYTDFGKAAGAEDYAQQEAVRASYGKGFTLSISGLFVTTKTVGARVELSEQQLLLW  |
| 00:1 Ac-MVPAEAATVAPLLIMNR                     | -----                                                         |
| 01:9606 7672 0#NP_149124 CNP Homo_sapiens     | PSDVKLSPTDNLPRGSRAHITLGCADVEAVQTGLDLLEILRQEKGGSRGEEVGELSRG    |
| 01:9606 7672 NM_033133 CNP Homo_sapiens       | PSDVKLSPTDNLPRGSRAHITLGCADVEAVQTGLDLLEILRQEKGGSRGEEVGELSRG    |
| 03:9544 7672 NM_001035528 CNP Macaca_mulatta  | PSDVKLSPTDNLPRGSRAHITLGCADVEAVQTGLDLLEILRQEKGGSRGEEVGELSRG    |
| 04:9913 7672 NM_180993 CNP Bos_taurus         | PNDVDKLSPTDNLPRGSRAHITLGCAGDAEAVQTGIDLLEIVRQEKGGSRGEEVGELSRG  |
| 06:10116 7672 NM_012809 Cnp Rattus_norvegicus | PSDLTKPSSESLPPGSRAHVITLGCADVPVQVTGLDLLEILLQVVKGGSQGEAVGELPRG  |
| 07:10090 7672 NM_001146318 Cnp Mus_musculus   | PSDLTKPSASEGLPPGSRHVITLGCADVPVQVTGLDLLDILQVVKGGSQGEAVGELPRG   |
| 07:10090 7672 NM_009923 Cnp Mus_musculus      | PSDLTKPSASEGLPPGSRHVITLGCADVPVQVTGLDLLDILQVVKGGSQGEAVGELPRG   |
| 08:9031 7672 NM_205050 CNP Gallus_gallus      | PGADAKLQATDSLPKGSRAHITLGCASGVEAVQTGMDLLEFVKLEKAGSKGEEVGEIGGG  |
| 00:1 Ac-MVPAEAATVAPLLIMNR                     | -----                                                         |
| 01:9606 7672 0#NP_149124 CNP Homo_sapiens     | KLYSLNGRWMLTLAKNMEVRAIFTGYYGKGKPVPTQGSRKGG-ALQSCSTII          |
| 01:9606 7672 NM_033133 CNP Homo_sapiens       | KLYSLNGRWMLTLAKNMEVRAIFTGYYGKGKPVPTQGSRKGG-ALQSCSTII          |
| 03:9544 7672 NM_001035528 CNP Macaca_mulatta  | KLYSLNGRWMLNLAKNMEVRAIFTGYYGKGKPVSTQGSRKGG-ALQSCSTII          |
| 04:9913 7672 NM_180993 CNP Bos_taurus         | KLYSLGSGRWMLSLAKKMEVRAIFTGYYGKGKAVPIRSGRKGG-SFQSCSTII         |
| 06:10116 7672 NM_012809 Cnp Rattus_norvegicus | KLYSLGKGRWMLSLAKKMEVKAIFTGYYGKGKPVPHVHSRKGG-AMQICTII          |

|                                             |                                                      |
|---------------------------------------------|------------------------------------------------------|
| 07:10090 7672 NM_001146318 Cnp Mus_musculus | KLYSLGKGRWMLSLTKKMEVKAIFTGYYGKGKPVPIHGSRKGG-AMQICTII |
| 07:10090 7672 NM_009923 Cnp Mus_musculus    | KLYSLGKGRWMLSLTKKMEVKAIFTGYYGKGKPVPIHGSRKGG-AMQICTII |
| 08:9031 7672 NM_205050 CNP Gallus_gallus    | KLQYFGNGMWMLTSLKKIDVRAIFSGYYGKGKLVPTQSTNKRGSVFSSCTIN |

*KIAA1919*

Ac-MELEVELR

CLUSTAL O(1.2.1) multiple sequence alignment

|                                                   |                                                               |
|---------------------------------------------------|---------------------------------------------------------------|
| 00:1 Ac-MELEVELR                                  | -----MELEVELR-----                                            |
| 01:9606 77426 0#NP_699200 KIAA1919 Homo_sapiens   | -----                                                         |
| 01:9606 77426 NM_153369 KIAA1919 Homo_sapiens     | -----EARRQDDDFSGA--AELELEVELRGAGPP                            |
| 07:10090 77426 NM_144821 AI317395 Mus_musculus    | -----LSAA--AKLELDVKTTGSGVGPV                                  |
| 10:7955 77426 NM_001089520 zgc:162161 Danio_rerio | QLFRPQQSKRRAAMSPAEEAPRKKHVRFARMEGDVDHDDQEENTLFDKQKDVKEGLKSVL  |
| 00:1 Ac-MELEVELR                                  | -----                                                         |
| 01:9606 77426 0#NP_699200 KIAA1919 Homo_sapiens   | -----MLCASFLGLGLSVAIVGPT                                      |
| 01:9606 77426 NM_153369 KIAA1919 Homo_sapiens     | AAGQRLQLQAEAPANEPEPEVSVWSQSGGTGSKLRWFTTLMLCASFLGLGLSVAIVGPT   |
| 07:10090 77426 NM_144821 AI317395 Mus_musculus    | AAAQRLHQAETRAESEQ---ATVASRRSGRTRSVLRWFSTAVMYAAFLGLGMSVAILGPT  |
| 10:7955 77426 NM_001089520 zgc:162161 Danio_rerio | KGGKGI-----LSQGSQQVDVVRPGRSKTGTCTWRWLVSLLCASFLGLGMAISVLGPT    |
| 00:1 Ac-MELEVELR                                  | -----                                                         |
| 01:9606 77426 0#NP_699200 KIAA1919 Homo_sapiens   | FQDLATNVNRNISSLSFIFVGRALGYLSGSVIGGFLVDVMNYFLLLGISMSATTVGLYLV  |
| 01:9606 77426 NM_153369 KIAA1919 Homo_sapiens     | FQDLATNVNRNISSLSFIFVGRALGYLSGSVIGGFLVDVMNYFLLLGISMSATTVGLYLV  |
| 07:10090 77426 NM_144821 AI317395 Mus_musculus    | FQDLAENVNRNISSLSLIFVGRATGFLSGTMIGGVLFHDHINQFFLLGASMVATAAGLYLI |
| 10:7955 77426 NM_001089520 zgc:162161 Danio_rerio | FEDLAINVNKNISNLSYIFVGRASGYIGGSLLGGILFDFVNPHELLGFAILLTTAFGMSGT |
| 00:1 Ac-MELEVELR                                  | -----                                                         |
| 01:9606 77426 0#NP_699200 KIAA1919 Homo_sapiens   | PFCKTAILLTVMMSIFGVSIGILDTGGNVLILAIWGDKGAPHMQUALHFSFALGAFLAPLL |
| 01:9606 77426 NM_153369 KIAA1919 Homo_sapiens     | PFCKTAILLTVMMSIFGVSIGILDTGGNVLILAIWGDKGAPHMQUALHFSFALGAFLAPLL |
| 07:10090 77426 NM_144821 AI317395 Mus_musculus    | PFCKTAVLLIITMSVFGASVGVVDTGANVLLDLWGDKGAPQMQUALHFSFALGAFLAPLL  |
| 10:7955 77426 NM_001089520 zgc:162161 Danio_rerio | PFCKKAWVLTVLMSVGVSMGVLDTGNNVLLNTWGEQAGPHMQUALHFSFAAGAFASPII   |
| 00:1 Ac-MELEVELR                                  | -----                                                         |
| 01:9606 77426 0#NP_699200 KIAA1919 Homo_sapiens   | AKLALGPTASAENHTESDFHP-ALNQSSDADSEALFG-----VPNDKNLLWAYAVIGTYM  |
| 01:9606 77426 NM_153369 KIAA1919 Homo_sapiens     | AKLALGPTASAENHTESDFHP-ALNQSSDADSEALFG-----VPNDKNLLWAYAVIGTYM  |
| 07:10090 77426 NM_144821 AI317395 Mus_musculus    | AKLAWGTAP-AQNHTESDLDTLMLNRSSNGTSDSVFA-----VPDDMNLWAYASIGTFI   |
| 10:7955 77426 NM_001089520 zgc:162161 Danio_rerio | AKLLFGHNSSTNTSLMSGHA-----SKTIDAVLPFSSHPKGTSTIDLPMWWAYIVIGAFV  |
| 00:1 Ac-MELEVELR                                  | -----                                                         |
| 01:9606 77426 0#NP_699200 KIAA1919 Homo_sapiens   | FLVSVIFFCLFLKNSSKQEKARASAEFRRAKYHNALLCLLFLFFFFYVGAEVTYGSYVF   |
| 01:9606 77426 NM_153369 KIAA1919 Homo_sapiens     | FLVSVIFFCLFLKNSSKQEKARASAEFRRAKYHNALLCLLFLFFFFYVGAEVTYGSYVF   |
| 07:10090 77426 NM_144821 AI317395 Mus_musculus    | LVVSVFLFGLFCKKHRSQKKPRASAEAGARRAKYHRALLCLLFLFFFFYVGAETIYGSYIF |
| 10:7955 77426 NM_001089520 zgc:162161 Danio_rerio | LLVSLFFFSLYFCISTNSNRKTASGKQQFSKHHTLIILLSMFFFFYVGSVEVAYGSAFIF  |
| 00:1 Ac-MELEVELR                                  | -----                                                         |
| 01:9606 77426 0#NP_699200 KIAA1919 Homo_sapiens   | SFATTHAGMKESEAAGLNSIFWGTFAACRGLAIFFATCLQPGTMIVLSNIGSLTSSFLV   |
| 01:9606 77426 NM_153369 KIAA1919 Homo_sapiens     | SFATTHAGMKESEAAGLNSIFWGTFAACRGLAIFFATCLQPGTMIVLSNIGSLTSSFLV   |
| 07:10090 77426 NM_144821 AI317395 Mus_musculus    | SFATTHVGMEESEAAGLNSIFWGTFAACRGLAIFFATFLQPGTMIVLSNIGSLVSCFFLV  |
| 10:7955 77426 NM_001089520 zgc:162161 Danio_rerio | TYGKDYVHMEETEAAGLNSLFWGAFAAGRGLAIFFAACLHPGTLILLSLVGTTVSSLLLC  |
| 00:1 Ac-MELEVELR                                  | -----                                                         |
| 01:9606 77426 0#NP_699200 KIAA1919 Homo_sapiens   | LFDKNPICLWIATSVYGASMATTFPSGVSWIEQYTTIHGKSAAFFVIGASLGEMAIPAVI  |
| 01:9606 77426 NM_153369 KIAA1919 Homo_sapiens     | LFDKNPICLWIATSVYGASMATTFPSGVSWIEQYTTIHGKSAAFFVIGASLGEMAIPAVI  |
| 07:10090 77426 NM_144821 AI317395 Mus_musculus    | LFDKSPCLLWIATSVYGASMAATFPSGISWIEQYTTLTGKSAAFFVIGSALGDMAIPAVI  |
| 10:7955 77426 NM_001089520 zgc:162161 Danio_rerio | LFSQNPMLWACTALYGISMSTTFPSGISWVEQYTTVTGRSAAIFVVGAALGEMVLPALL   |
| 00:1 Ac-MELEVELR                                  | -----                                                         |
| 01:9606 77426 0#NP_699200 KIAA1919 Homo_sapiens   | GILQKGYPDLPVVLYTSLGASIATGILFPVLYKLATSPDRQRKEDR-----KSEDQKAL   |
| 01:9606 77426 NM_153369 KIAA1919 Homo_sapiens     | GILQKGYPDLPVVLYTSLGASIATGILFPVLYKLATSPDRQRKEDR-----KSEDQKAL   |
| 07:10090 77426 NM_144821 AI317395 Mus_musculus    | GILQGHYPDLPVVLYTCLGSAIFTAILFPVMYKLATLPLKREDQKAL-----P-----    |
| 10:7955 77426 NM_001089520 zgc:162161 Danio_rerio | GFLLGHVQNYPLLMYLTLCATFTSILFPVLYKLASPEGNVTLRKSSSGKCTIKDADDSEY  |
| 00:1 Ac-MELEVELR                                  | -----                                                         |
| 01:9606 77426 0#NP_699200 KIAA1919 Homo_sapiens   | LSSSGLNE-YEENEEDAEKWNEMDFEMIETNDTMRHSIIETSRSSLTEPTAEVYNQYP    |
| 01:9606 77426 NM_153369 KIAA1919 Homo_sapiens     | LSSSGLNE-YEENEEDAEKWNEMDFEMIETNDTMRHSIIETSRSSLTEPTAEVYNQYP    |
| 07:10090 77426 NM_144821 AI317395 Mus_musculus    | -TSSRL-----                                                   |
| 10:7955 77426 NM_001089520 zgc:162161 Danio_rerio | -RQALLENMEEQEENESEADLCNDADFEVIEMDDASLLSSPK-----SSPPADVAASVP   |
| 00:1 Ac-MELEVELR                                  | -----                                                         |
| 01:9606 77426 0#NP_699200 KIAA1919 Homo_sapiens   | SNALVFESSPFNTGSA--HVKHLPETRTKGTNV                             |
| 01:9606 77426 NM_153369 KIAA1919 Homo_sapiens     | SNALVFESSPFNTGSA--HVKHLPETRTKGTNV                             |
| 07:10090 77426 NM_144821 AI317395 Mus_musculus    | -----                                                         |
| 10:7955 77426 NM_001089520 zgc:162161 Danio_rerio | DVHLVA--SPLSEPNNLSFSTDSPRSCL-----                             |

*HM13*

Ac-AFPAEPVSPPASLLQQPELESDPER

```

00:1|Ac-AFPAEPVSPPASLLQQPELESDPER-----A--FPAEPVSPPASLLQQPE-----LESDPER-
01:9606|7749|0#NP_110416|HM13|Homo_sapiens-----
01:9606|7749|0#NP_848695|HM13|Homo_sapiens-----
01:9606|7749|0#NP_848696|HM13|Homo_sapiens-----
01:9606|7749|0#NP_848697|HM13|Homo_sapiens-----
01:9606|7749|NM_030789|HM13|Homo_sapiens-----GNVA--FPAEPVSPPASLLQQPE-----LESDPERT
01:9606|7749|NM_178580|HM13|Homo_sapiens-----GNVA--FPAEPVSPPASLLQQPE-----LESDPERT
01:9606|7749|NM_178581|HM13|Homo_sapiens-----GNVA--FPAEPVSPPASLLQQPE-----LESDPERT
01:9606|7749|NM_178582|HM13|Homo_sapiens-----ARRGLGREHVTSCCLRGTWLSLQSRCLR---LRPCCSNRWSRIPNAPSPWTRPSAIRI
04:9913|7749|NM_001046124|HM13|Bos_taurus-----VTSCTFFRGTWL--SPQRIIFLSASPLQRL--LELDPERS
06:10116|7749|NM_001107789|Hm13|Rattus_norvegicus-----SLPVSLGERG--FPRSASSPSAFVLRPRP-----LESEPEPS
07:10090|7749|NM_001159551|H13|Mus_musculus-----GGTSLPVSLGERG--FPRSASSPSTFVLRPRP-----LESEPEPS
07:10090|7749|NM_001159552|H13|Mus_musculus-----GGTSLPVSLGERG--FPRSASSPSTFVLRPRP-----LESEPEPS
07:10090|7749|NM_001159553|H13|Mus_musculus-----GGTSLPVSLGERG--FPRSASSPSTFVLRPRP-----LESEPEPS
07:10090|7749|NM_010376|H13|Mus_musculus-----GGTSLPVSLGERG--FPRSASSPSTFVLRPRP-----LESEPEPS
10:7955|7749|NM_212572|hml3|Danio_erio-----NM
12:7227|7749|NM_078720|Spp|Drosophila_melanogaster-----RVLLRVISLFTPASRRFSGTDWIGQHSMAEEVIGTVKEVL

```

```

00:1|Ac-AFFPAEPVSPASPALLQPELESPPER-----
01:9606|7749|0#NP_110416|Hm13|Homo_sapiens--MDSALSDPHNGSAEAGGPTNS-TTRPPSTPEGIALAYGSLLLMALLPIFFGALRSVRC
01:9606|7749|0#NP_848695|Hm13|Homo_sapiens--MDSALSDPHNGSAEAGGPTNS-TTRPPSTPEGIALAYGSLLLMALLPIFFGALRSVRC
01:9606|7749|0#NP_848696|Hm13|Homo_sapiens--MDSALSDPHNGSAEAGGPTNS-TTRPPSTPEGIALAYGSLLLMALLPIFFGALRSVRC
01:9606|7749|0#NP_848697|Hm13|Homo_sapiens--MDSALSDPHNGSAEAGGPTNS-TTRPPSTPEGIALAYGSLLLMALLPIFFGALRSVRC
01:9606|7749|NM_030789|Hm13|Homo_sapiensLAMDALSDDPHNGSAEAGGPTNS-TTRPPSTPEGIALAYGSLLLMALLPIFFGALRSVRC
01:9606|7749|NM_178580|Hm13|Homo_sapiensLAMDALSDDPHNGSAEAGGPTNS-TTRPPSTPEGIALAYGSLLLMALLPIFFGALRSVRC
01:9606|7749|NM_178581|Hm13|Homo_sapiensLAMDALSDDPHNGSAEAGGPTNS-TTRPPSTPEGIALAYGSLLLMALLPIFFGALRSVRC
01:9606|7749|NM_178582|Hm13|Homo_sapiensLAMDALSDDPHNGSAEAGGPTNS-TTRPPSTPEGIALAYGSLLLMALLPIFFGALRSVRC
04:9913|7749|NM_001046124|Hm13|Bos_taurusTA-----V
06:10116|7749|NM_001107789|Hm13|Rattus_norvegicusFAMDASVSDPHNGSAEAGGPTNG-TTRPPSTPEGIALAYGSLLLMALLPIFFGALRSVRC
07:10090|7749|NM_001159551|H13|Mus_musculusLAMDALSDDPHNGSSEAGTPANG-TTRPPSTPEGIALAYGSLLLMALLPIFFGALRSVRC
07:10090|7749|NM_001159552|H13|Mus_musculusLAMDASVSDPHNGSAEAGTPANG-TTRPPSTPEGIALAYGSLLLMALLPIFFGALRSVRC
07:10090|7749|NM_001159553|H13|Mus_musculusLAMDASVSDPHNGSAEAGTPANG-TTRPPSTPEGIALAYGSLLLMALLPIFFGALRSVRC
07:10090|7749|NM_010376|H13|Mus_musculusLAMDASVSDPHNGSAEAGTPANG-TTRPPSTPEGIALAYGSLLLMALLPIFFGALRSVRC
10:7955|7749|NM_212572|Hm13|Danio_erioADVEQTAPH-DGSSNGSDLVNGTAGRFVSSAEGTALAYGSLLLMALLPIFFGALRSVGC
12:7227|7749|NM_078720|Spp|Drosophila_melanogasterKGI IENVNAPKNES-----APEKKPSTPEGMAYVSSVLVMMALPI IFGSIRSVK

```

```
00:1|Ac-AFFPAEPVSPASLLQPELESPPER-----  
01:9606|7749|0#NP_110416|HM13|Homo_sapiens|ARGKN-ASDMPETITSRDAARFPIIASCTLLGLYLFFKIFSQEYINLLLSMYFFVLGILA  
01:9606|7749|0#NP_848695|HM13|Homo_sapiens|ARGKN-ASDMPETITSRDAARFPIIASCTLLGLYLFFKIFSQEYINLLLSMYFFVLGILA  
01:9606|7749|0#NP_848696|HM13|Homo_sapiens|ARGKN-ASDMPETITSRDAARFPIIASCTLLGLYLFFKIFSQEYINLLLSMYFFVLGILA  
01:9606|7749|0#NP_848697|HM13|Homo_sapiens|ARGKN-ASDMPETITSRDAARFPIIASCTLLGLYLFFKIFSQEYINLLLSMYFFVLGILA  
01:9606|7749|NM_030789|HM13|Homo_sapiens|ARGKN-ASDMPETITSRDAARFPIIASCTLLGLYLFFKIFSQEYINLLLSMYFFVLGILA  
01:9606|7749|NM_178580|HM13|Homo_sapiens|ARGKN-ASDMPETITSRDAARFPIIASCTLLGLYLFFKIFSQEYINLLLSMYFFVLGILA  
01:9606|7749|NM_178581|HM13|Homo_sapiens|ARGKN-ASDMPETITSRDAARFPIIASCTLLGLYLFFKIFSQEYINLLLSMYFFVLGILA  
01:9606|7749|NM_178582|HM13|Homo_sapiens|PRQAAPPTALRGRLPRPRASRWPTAASC SWRCPPSSSA-PCAPYAAPAARMQLQ-----  
04:9913|7749|NM_001046124|HM13|Bos_taurus|ARGKN-ASDMPETITSRDAARFPIIASCTLLGLYLFFKIFSQEYINLLLSMYFFVLGILA  
06:10116|7749|NM_001107789|Hm13|Rattus_norvegicus|ARGKS-SSDMPETITSRDAARFPIIASCTLLGLYLFFKLFSQEYINLLLSMYFFVLGILA  
07:10090|7749|NM_001159551|H13|Mus_musculus|ARGKS-SSDMPETITSRDAARFPIIASCTLLGLYLFFKIFSQEYINLLLSMYFFVLGILA  
07:10090|7749|NM_001159552|H13|Mus_musculus|ARGKS-SSDMPETITSRDAARFPIIASCTLLGLYLFFKIFSQEYINLLLSMYFFVLGILA  
07:10090|7749|NM_001159553|H13|Mus_musculus|ARGKS-SSDMPETITSRDAARFPIIASCTLLGLYLFFKIFSQEYINLLLSMYFFVLGILA  
07:10090|7749|NM_010376|H13|Mus_musculus|ARGKS-SSDMPETITSRDAARFPIIASCTLLGLYLFFKIFSQEYINLLLSMYFFVLGILA  
10:7955|7749|NM_212572|hml3|Danio_erio|SKSGS-SSDMPETITSRDAARFPIIASCTLFLGYLFFKFVSQEYNLLMSYFFVLGILA  
12:7227|7749|NM_078720|Spp|Drosophila_melanogaster|HKLKSTGEKADMTKKDAMYFPLIASAALPGLYLFFKIFQKVHINYLLTGYYFFVLGVIA
```

```

00:1|Ac-AFPAEPVSPASPALLQPELESPPER-----
01:9606|7749|0#NP_110416|Hm13|Homo_sapiens|LSHTISPFMNKFFPASFPNRRQYQLLFTQGSGENKEEIIYNEF-DTKDLVCLGLSSIVGVW
01:9606|7749|0#NP_848695|Hm13|Homo_sapiens|LSHTISPFMNKFFPASFPNRRQYQLLFTQGSGENKEEIIYNEF-DTKDLVCLGLSSIVGVW
01:9606|7749|0#NP_848696|Hm13|Homo_sapiens|LSHTISPFMNKFFPASFPNRRQYQLLFTQGSGENKEEIIYNEF-DTKDLVCLGLSSIVGVW
01:9606|7749|0#NP_848697|Hm13|Homo_sapiens|LSHTIRSEGISLQHLKQLSR----EPVQGLG-----
01:9606|7749|NM_030789|Hm13|Homo_sapiens|LSHTISPFMNKFFPASFPNRRQYQLLFTQGSGENKEEIIYNEF-DTKDLVCLGLSSIVGVW
01:9606|7749|NM_178580|Hm13|Homo_sapiens|LSHTISPFMNKFFPASFPNRRQYQLLFTQGSGENKEEIIYNEF-DTKDLVCLGLSSIVGVW
01:9606|7749|NM_178581|Hm13|Homo_sapiens|LSHTISPFMNKFFPASFPNRRQYQLLFTQGSGENKEEIIYNEF-DTKDLVCLGLSSIVGVW
01:9606|7749|NM_178582|Hm13|Homo_sapiens|LSHTISPFMNKFFPASFPNRRQYQLLFTQGSGENKEEIIYNEF-DTKDLVCLGLSSIVGVW
04:9913|7749|NM_001046124|Hm13|Bos_taurus|LSHTISPLMNKFFPANFPNRRQYQLLFTQGSGENKEEIIYNEF-DTKDLVCLGLSSIVGVW
06:10116|7749|NM_001107789|Hm13|Rattus_norvegicus|LSHTISPFMNKFFPANFPNRRQYQLLFTQGSGENKEEIIYNEF-DTKDLVCLGLSSIVGVW
07:10090|7749|NM_001159551|H13|Mus_musculus|LSHTISPFMNKFFPANFPNRRQYQLLFTQGSGENKEEIIYNEF-DTKDLVCLGLSSIVGVW
07:10090|7749|NM_001159552|H13|Mus_musculus|LSHTISPFMNKFFPANFPNRRQYQLLFTQGSGENKEGQCCPCP----LGVVFPSCSLPVL
07:10090|7749|NM_001159553|H13|Mus_musculus|LSHTIRSEGISRQPLKLSQ----EPVQGLGWEH-GLLCHSE-PGLNPGCKIQGNLPSRQ
07:10090|7749|NM_010376|H13|Mus_musculus|LSHTISPFMNKFFPANFPNRRQYQLLFTQGSGENKEEIIYNEF-DTKDLVCLGLSSIVGVW
10:7955|7749|NM_212572|hml3|Danio_erio|LSHTMSPFMCRVFPANLSNRRQYQLLFTQGSGENKEEIVNYEF-DTKDLICLCISSVVGVW
12:7227|7749|NM_078720|Spp|Drosophila_melanogaster|LAHLSPVINSMLPAAPKVPVPHLLFTKGEKHKEDIVNYKFS-STHDIVCLVISAIGVW

```

```

00:1|Ac-AFPAEPVSPASPALLQPELESPPER-----
01:9606 7749|0#NP_110416|HM13|Homo_sapiensYLLRRKH--WIANNLFLGLAFSLNGVELLHLNNVSTGCILLGGGLFYDVFVWFVGTNVMVTVA
01:9606 7749|0#NP_848695|HM13|Homo_sapiensYLLRRKH--WIANNLFLGLAFSLNGVELLHLNNVSTGCILLGGGLFYDVFVWFVGTNVMVTVA
01:9606 7749|0#NP_848696|HM13|Homo_sapiensYLLRRKH--WIANNLFLGLAFSLNGVELLHLNNVSTGCILLGGGLFYDVFVWFVGTNVMVTVA
01:9606 7749|0#NP_848697|HM13|Homo_sapiens-----
01:9606 7749|NM_030789|HM13|Homo_sapiensYLLRRKH--WIANNLFLGLAFSLNGVELLHLNNVSTGCILLGGGLFYDVFVWFVGTNVMVTVA
01:9606 7749|NM_178580|HM13|Homo_sapiensYLLRRKH--WIANNLFLGLAFSLNGVELLHLNNVSTGCILLGGGLFYDVFVWFVGTNVMVTVA

```

|          |      |              |       |                         |                                                              |
|----------|------|--------------|-------|-------------------------|--------------------------------------------------------------|
| 01:9606  | 7749 | NM_178581    | HM13  | Homo_sapiens            | YLLRKH--WIANNLFGLAFSLNGVELLHLNNVSTGCILLGGLFIYDVFVWFGTNVMVTVA |
| 01:9606  | 7749 | NM_178582    | HM13  | Homo_sapiens            | PCPTPS-----GQKASLCNI-----                                    |
| 04:9913  | 7749 | NM_001046124 | HM13  | Bos_taurus              | YLLRKH--WIANNLFGLAFSLNGVELLHLNNVSTGCILLGGLFIYDIFVWFGTNVMVTVA |
| 06:10116 | 7749 | NM_001107789 | HM13  | Rattus_norvegicus       | YLLRKH--WIANNLFGLAFSLNGVELLHLNNVSTGCILLGGLFIYDIFVWFGTNVMVTVA |
| 07:10090 | 7749 | NM_001159551 | H13   | Mus_musculus            | YLLRKH--WIANNLFGLAFSLNGVELLHLNNVSTGCILLGGLFIYDIFVWFGTNVMVTVA |
| 07:10090 | 7749 | NM_001159552 | H13   | Mus_musculus            | GFPKKRALKTKPNLYGPGSYPA-WSPPSNGNLNDPVVSEHGLFLEVCCYPI C-----   |
| 07:10090 | 7749 | NM_001159553 | H13   | Mus_musculus            | HYT-----                                                     |
| 07:10090 | 7749 | NM_010376    | H13   | Mus_musculus            | YLLRKH--WIANNLFGLAFSLNGVELLHLNNVSTGCILLGGLFIYDIFVWFGTNVMVTVA |
| 10:7955  | 7749 | NM_212572    | hml13 | Danio_rerio             | YVLKKH--WIANNLFGLAFALNGVELLHLNNVSTGCILLGGLFVYDVFVWFGTNVMVTVA |
| 12:7227  | 7749 | NM_078720    | Spp   | Drosophila_melanogaster | YLLKKH--WIANNLFGLAFAINGVEMLHLNNFVTGVILLSGLFFYDIFVWFGTNVMVTVA |

|          |                               |                                       |
|----------|-------------------------------|---------------------------------------|
| 00:1     | Ac-AFPAEPVSPPASLLQQPELES DPER |                                       |
| 01:9606  | 7749                          | 0#NP_110416 HM13 Homo_sapiens         |
| 01:9606  | 7749                          | 0#NP_848695 HM13 Homo_sapiens         |
| 01:9606  | 7749                          | 0#NP_848696 HM13 Homo_sapiens         |
| 01:9606  | 7749                          | 0#NP_848697 HM13 Homo_sapiens         |
| 01:9606  | 7749                          | NM_030789 HM13 Homo_sapiens           |
| 01:9606  | 7749                          | NM_178580 HM13 Homo_sapiens           |
| 01:9606  | 7749                          | NM_178581 HM13 Homo_sapiens           |
| 01:9606  | 7749                          | NM_178582 HM13 Homo_sapiens           |
| 04:9913  | 7749                          | NM_001046124 HM13 Bos_taurus          |
| 06:10116 | 7749                          | NM_001107789 HM13 Rattus_norvegicus   |
| 07:10090 | 7749                          | NM_001159551 H13 Mus_musculus         |
| 07:10090 | 7749                          | NM_001159552 H13 Mus_musculus         |
| 07:10090 | 7749                          | NM_001159553 H13 Mus_musculus         |
| 07:10090 | 7749                          | NM_010376 H13 Mus_musculus            |
| 10:7955  | 7749                          | NM_212572 hml13 Danio_rerio           |
| 12:7227  | 7749                          | NM_078720 Spp Drosophila_melanogaster |

-----

|                |               |                |                      |
|----------------|---------------|----------------|----------------------|
| KSFEAPIKLVFPQD | LLEKGLEANNFAM | GLGDVVIPGIFIA  | LLLRFDISLKKNTHTYFYT  |
| KSFEAPIKLVFPQD | LLEKGLEANNFAM | GLGDVVIPGIFIA  | LLLRFDISLKKNTHTYFYT  |
| KSFEAPIKLVFPQD | LLEKGLEANNFAM | GLGDVVIPGIFIA  | LLLRFDISLKKNTHTYFYT  |
| -----          |               |                |                      |
| KSFEAPIKLVFPQD | LLEKGLEANNFAM | GLGDVVIPGIFIA  | LLLRFDISLKKNTHTYFYT  |
| KSFEAPIKLVFPQD | LLEKGLEANNFAM | GLGDVVIPGIFIA  | LLLRFDISLKKNTHTYFYT  |
| KSFEAPIKLVFPQD | LLEKGLEANNFAM | GLGDVVIPGIFIA  | LLLRFDISLKKNTHTYFYT  |
| -----          |               |                |                      |
| KSFEAPIKLVFPQD | LLEKGLEADNFAM | GLGDIVIPGIFIA  | LLLRFDISLKKNTHTYFYT  |
| KSFEAPIKLVFPQD | LLEKGLEADNFAM | GLGDIVIPGIFIA  | LLLRFDISLKKNTHTYFYT  |
| KSFEAPIKLVFPQD | LLEKGLEADNFAM | GLGDIVIPGIFIA  | LLLRFDISLKKNTHTYFYT  |
| -----KME-----  |               |                |                      |
| -----          |               |                |                      |
| KSFEAPIKLVFPQD | LLEKGLEADNFAM | GLGDIVIPGIFIA  | LLLRFDISLKKNTHTYFYT  |
| KSFEAPIKLVFPQD | LLEKGLGASNFA  | MLGLDIVIPGIFIA | LLLRFDVSLKKNTRTYFYT  |
| KSFEAPIKLVFPQD | LIENGLNASNFA  | MLGLDIVIPGIFIA | LLLRFDSDSKRKRTRIYFYS |

|          |                               |                                       |
|----------|-------------------------------|---------------------------------------|
| 00:1     | Ac-AFPAEPVSPPASLLQQPELES DPER |                                       |
| 01:9606  | 7749                          | 0#NP_110416 HM13 Homo_sapiens         |
| 01:9606  | 7749                          | 0#NP_848695 HM13 Homo_sapiens         |
| 01:9606  | 7749                          | 0#NP_848696 HM13 Homo_sapiens         |
| 01:9606  | 7749                          | 0#NP_848697 HM13 Homo_sapiens         |
| 01:9606  | 7749                          | NM_030789 HM13 Homo_sapiens           |
| 01:9606  | 7749                          | NM_178580 HM13 Homo_sapiens           |
| 01:9606  | 7749                          | NM_178581 HM13 Homo_sapiens           |
| 01:9606  | 7749                          | NM_178582 HM13 Homo_sapiens           |
| 04:9913  | 7749                          | NM_001046124 HM13 Bos_taurus          |
| 06:10116 | 7749                          | NM_001107789 HM13 Rattus_norvegicus   |
| 07:10090 | 7749                          | NM_001159551 H13 Mus_musculus         |
| 07:10090 | 7749                          | NM_001159552 H13 Mus_musculus         |
| 07:10090 | 7749                          | NM_001159553 H13 Mus_musculus         |
| 07:10090 | 7749                          | NM_010376 H13 Mus_musculus            |
| 10:7955  | 7749                          | NM_212572 hml13 Danio_rerio           |
| 12:7227  | 7749                          | NM_078720 Spp Drosophila_melanogaster |

-----

|                                                                |
|----------------------------------------------------------------|
| SFAAYIFGLGLTIFIMHIFKHAQPALLYLVPACIGFPVLVALAKGEVTEMFSYE-----    |
| SFAAYIFGLGLTIFIMHIFKHAQPALLYLVPACIGFPVLVALAKGEVTEMFSYESSAEIL   |
| SFAAYIFGLGLTIFIMHIFKHAQPALLYLVPACIGFPVLVALAKGEVTEMFSYESSAEIL   |
| -----                                                          |
| SFAAYIFGLGLTIFIMHIFKHAQPALLYLVPACIGFPVLVALAKGEVTEMFSYE-----    |
| SFAAYIFGLGLTIFIMHIFKHAQPALLYLVPACIGFPVLVALAKGEVTEMFSYESSAEIL   |
| SFAAYIFGLGLTIFIMHIFKHAQPALLYLVPACIGFPVLVALAKGEVTEMFSYESSAEIL   |
| -----                                                          |
| SFAAYIFGLGLTIFIMHIFKHAQPALLYLVPACIGFPVLVALAKGEVTEMFSYE-----    |
| SFAAYIFGLGLTIFIMHIFKHAQPALLYLVPACIGFPVLVALVKEVAEMFSYEE SNPKD   |
| SFAAYIFGLGLTIFIMHIFKHAQPALLYLVPACIGFPVLVALAKGEVAEMFSYESSAVIL   |
| -----                                                          |
| SFAAYIFGLGLTIFIMHIFKHAQPALLYLVPACIGFPVLVALAKGEVAEMFSYEE SNPKD  |
| SFLAYIFGLGLTIFVMHFTFKHAQPALLYLVPACVGFPPVLVALVKGELTEMFRYEEETPSK |
| TLIAYFGLGLLATIFVMHVFKHAQPALLYLVPACMGTPLLVALIRGELKVLFA YEDHPEEK |

|          |                               |                                       |
|----------|-------------------------------|---------------------------------------|
| 00:1     | Ac-AFPAEPVSPPASLLQQPELES DPER |                                       |
| 01:9606  | 7749                          | 0#NP_110416 HM13 Homo_sapiens         |
| 01:9606  | 7749                          | 0#NP_848695 HM13 Homo_sapiens         |
| 01:9606  | 7749                          | 0#NP_848696 HM13 Homo_sapiens         |
| 01:9606  | 7749                          | 0#NP_848697 HM13 Homo_sapiens         |
| 01:9606  | 7749                          | NM_030789 HM13 Homo_sapiens           |
| 01:9606  | 7749                          | NM_178580 HM13 Homo_sapiens           |
| 01:9606  | 7749                          | NM_178581 HM13 Homo_sapiens           |
| 01:9606  | 7749                          | NM_178582 HM13 Homo_sapiens           |
| 04:9913  | 7749                          | NM_001046124 HM13 Bos_taurus          |
| 06:10116 | 7749                          | NM_001107789 HM13 Rattus_norvegicus   |
| 07:10090 | 7749                          | NM_001159551 H13 Mus_musculus         |
| 07:10090 | 7749                          | NM_001159552 H13 Mus_musculus         |
| 07:10090 | 7749                          | NM_001159553 H13 Mus_musculus         |
| 07:10090 | 7749                          | NM_010376 H13 Mus_musculus            |
| 10:7955  | 7749                          | NM_212572 hml13 Danio_rerio           |
| 12:7227  | 7749                          | NM_078720 Spp Drosophila_melanogaster |

-----

|                                 |                |                                  |       |
|---------------------------------|----------------|----------------------------------|-------|
| -----ESNPKDPAAVTES-KE           |                |                                  |       |
| PHTPRLTHF-PTVSGSPASLADSMQ       | QKL            | AGPRRRRPQNPSAM                   | ----- |
| PHTPRLTHF-PTVSGSPASLADSMQ       | QKL            | AGPRRRRPQNPSAIYEESNPKDPAAVTES-KE | ----- |
| -----                           |                |                                  |       |
| -----ESNPKDPAAVTES-KE           |                |                                  |       |
| PHTPRLTHF-PTVSGSPASLADSMQ       | QKL            | AGPRRRRPQNPSAM                   | ----- |
| PHTPRLTHF-PTVSGSPASLADSMQ       | QKL            | AGPRRRRPQNPSAIYEESNPKDPAAVTES-KE | ----- |
| -----                           |                |                                  |       |
| -----ESNPKDPAAVTET-RE           |                |                                  |       |
| P-----                          | -----AAILLSQKH |                                  |       |
| PHTPRLTHF-PTVSGSPASLADSMQ       | QKL            | AGPRRRRPQNPSAM                   | ----- |
| -----                           |                |                                  |       |
| P-----                          | -----AAETESKEE |                                  |       |
| EETTESEKD-K-----                | -----          |                                  |       |
| PEKKEKKEKDEGVSSSGSKKESKKGK----- | -----          |                                  |       |

|          |                               |                                       |
|----------|-------------------------------|---------------------------------------|
| 00:1     | Ac-AFPAEPVSPPASLLQQPELES DPER |                                       |
| 01:9606  | 7749                          | 0#NP_110416 HM13 Homo_sapiens         |
| 01:9606  | 7749                          | 0#NP_848695 HM13 Homo_sapiens         |
| 01:9606  | 7749                          | 0#NP_848696 HM13 Homo_sapiens         |
| 01:9606  | 7749                          | 0#NP_848697 HM13 Homo_sapiens         |
| 01:9606  | 7749                          | NM_030789 HM13 Homo_sapiens           |
| 01:9606  | 7749                          | NM_178580 HM13 Homo_sapiens           |
| 01:9606  | 7749                          | NM_178581 HM13 Homo_sapiens           |
| 01:9606  | 7749                          | NM_178582 HM13 Homo_sapiens           |
| 04:9913  | 7749                          | NM_001046124 HM13 Bos_taurus          |
| 06:10116 | 7749                          | NM_001107789 HM13 Rattus_norvegicus   |
| 07:10090 | 7749                          | NM_001159551 H13 Mus_musculus         |
| 07:10090 | 7749                          | NM_001159552 H13 Mus_musculus         |
| 07:10090 | 7749                          | NM_001159553 H13 Mus_musculus         |
| 07:10090 | 7749                          | NM_010376 H13 Mus_musculus            |
| 10:7955  | 7749                          | NM_212572 hml13 Danio_rerio           |
| 12:7227  | 7749                          | NM_078720 Spp Drosophila_melanogaster |

-----

|                 |  |
|-----------------|--|
| GTEASASKGLEKKEK |  |
| GTEATTSKGLEKKEK |  |
| R-----          |  |
| -----           |  |
| -----           |  |
| -----           |  |
| STEASASKRLEKKEK |  |
| -----           |  |
| -----           |  |



*LMOD1*

Ac-AATAHFAKMSR

CLUSTAL O(1.2.1) multiple sequence alignment

|                                                    |                                                                   |
|----------------------------------------------------|-------------------------------------------------------------------|
| 00:1 Ac-AATAHFAKMSR                                | -----AATA                                                         |
| 01:9606 8118 0#NP_036266 LMOD1 Homo_sapiens        | -----                                                             |
| 01:9606 8118 NM_012134 LMOD1 Homo_sapiens          | -----PLAATA                                                       |
| 04:9913 8118 NM_001083715 LMOD1 Bos_taurus         | -----QPVP---AHPDPCRPTRAAA                                         |
| 06:10116 8118 NM_001107179 Lmod1 Rattus_norvegicus | -----RSLSLPC-LPPASPPDLVGATA                                       |
| 07:10090 8118 NM_053106 Lmod1 Mus_musculus         | QGGCCVPRSTCSTAGPKELQCSPSWGFKLPTQYQQEPGLPSLPCLLPPASPPHLVGAAA       |
| 00:1 Ac-AATAHFAKMSR                                | HFAKMSR-----                                                      |
| 01:9606 8118 0#NP_036266 LMOD1 Homo_sapiens        | ----MSRVAKYRRQVSEDPDIDSLLETLSPEEMEELEKELDVVDPDGSVPVGLRQRNQTE      |
| 01:9606 8118 NM_012134 LMOD1 Homo_sapiens          | HFAKMSRVAKYRRQVSEDPDIDSLLETLSPEEMEELEKELDVVDPDGSVPVGLRQRNQTE      |
| 04:9913 8118 NM_001083715 LMOD1 Bos_taurus         | HL SKMSKVAKYRRQVSEDPDIDSLSTLSPEEMEELEKELDVVDPDGSVPVGLRQRNQTE      |
| 06:10116 8118 NM_001107179 Lmod1 Rattus_norvegicus | HFAKMSKVAKYRRQVSEDPDIDSLSTLSPEEMEELEKELDVVDPDGSIPVGLRQRNQTD       |
| 07:10090 8118 NM_053106 Lmod1 Mus_musculus         | HFAKMSKVAKYRRQVSEDPDIDSLSTLSPEEMEELEKELDVVDPDGSIPVGLRQRNQTD       |
|                                                    | **:                                                               |
| 00:1 Ac-AATAHFAKMSR                                | -----                                                             |
| 01:9606 8118 0#NP_036266 LMOD1 Homo_sapiens        | KQSTGVYNREAMLNFCEKETKKLMQREMSMDESKQVETKTDAKNGEERGRDASKKALGPR      |
| 01:9606 8118 NM_012134 LMOD1 Homo_sapiens          | KQSTGVYNREAMLNFCEKETKKLMQREMSMDESKQVETKTDAKNGEERGRDASKKALGPR      |
| 04:9913 8118 NM_001083715 LMOD1 Bos_taurus         | KPSTGAYNREAMLSFCEKETKKLIQREASVDEGKQVETKTDAKKGEDKGRDAGKKPLGPR      |
| 06:10116 8118 NM_001107179 Lmod1 Rattus_norvegicus | KQPSGGSFNREAMLNFCEKESKKIIQREMSVDESKQVGRKTDAKNGEDKGSNASRKALGPR     |
| 07:10090 8118 NM_053106 Lmod1 Mus_musculus         | KQPSGGSFNREAMLNFCEKESKKLIQREMSVDESKQVGRKTDAKNGEEKDSDASRKAPGPR     |
| 00:1 Ac-AATAHFAKMSR                                | -----                                                             |
| 01:9606 8118 0#NP_036266 LMOD1 Homo_sapiens        | RDSDLGKEPKRGGLKKSFSRDRDEAGGKSGEKPKEEKIIRGIDKGRVRAAVDKKEAGKDG      |
| 01:9606 8118 NM_012134 LMOD1 Homo_sapiens          | RDSDLGKEPKRGGLKKSFSRDRDEAGGKSGEKPKEEKIIRGIDKGRVRAAVDKKEAGKDG      |
| 04:9913 8118 NM_001083715 LMOD1 Bos_taurus         | RDSDLGKEPKKGSMMKKSISRKDEADGRSAERPKEEKLVRGLEKGRVRAVVDKKEAGKEG      |
| 06:10116 8118 NM_001107179 Lmod1 Rattus_norvegicus | QDSDVGKEPKKGVLLKKSFSRDREEDSRGSEKPKEEKVIRGIDKGRVRAAVDRKEAGKDG      |
| 07:10090 8118 NM_053106 Lmod1 Mus_musculus         | QDSDLGKEPKKGVLLKKSFSRDREEDGRGGEKPKEEKVIRGIDKGRVRAAVDRKESEGKDG     |
| 00:1 Ac-AATAHFAKMSR                                | -----                                                             |
| 01:9606 8118 0#NP_036266 LMOD1 Homo_sapiens        | RGEERAVATKKEEEKGSDRNTGLSRDKDKKREEMKEVAKKEDDEKVKGERNTDTRKEG        |
| 01:9606 8118 NM_012134 LMOD1 Homo_sapiens          | RGEERAVATKKEEEKGSDRNTGLSRDKDKKREEMKEVAKKEDDEKVKGERNTDTRKEG        |
| 04:9913 8118 NM_001083715 LMOD1 Bos_taurus         | PAAPRK-----DEE-----KQRNVSRDKGKKGEQPEAASKTAAPEKAKGPRTGEDT----      |
| 06:10116 8118 NM_001107179 Lmod1 Rattus_norvegicus | REERAAATTKKEEKTGSVRNAGLSRDKDKKREEVKEPSKKEEVKL-TAENRSTVGRQED       |
| 07:10090 8118 NM_053106 Lmod1 Mus_musculus         | REERAAAA-RKEEKTGSVKNAGLSRDKDKKKEEVKEPSKKEEVKL-TAESRNTVGRRED       |
| 00:1 Ac-AATAHFAKMSR                                | -----                                                             |
| 01:9606 8118 0#NP_036266 LMOD1 Homo_sapiens        | EKMKRAGGNTDMKKEDEKVKRGTGNTDTKKDDEKVKKNEPLHEKEAKDSDKTKTPEKQTP      |
| 01:9606 8118 NM_012134 LMOD1 Homo_sapiens          | EKMKRAGGNTDMKKEDEKVKRGTGNTDTKKDDEKVKKNEPLHEKEAKDSDKTKTPEKQTP      |
| 04:9913 8118 NM_001083715 LMOD1 Bos_taurus         | -----RAEAQESKGGRRDRAARPEDEKARKEEPHEAKAPREDSKTPVPEKPTP             |
| 06:10116 8118 NM_001107179 Lmod1 Rattus_norvegicus | GKQKESREDR--DKKPEVKGIGCGSRDSRKEDEKVKKEETQPDKGVREEGKT--REKQPP      |
| 07:10090 8118 NM_053106 Lmod1 Mus_musculus         | GRLKESSEK-E--NKKPEDEBIGSGGRDWRKEDEKVKKEENQPDKEVREESKTKAPEKQAP     |
| 00:1 Ac-AATAHFAKMSR                                | -----                                                             |
| 01:9606 8118 0#NP_036266 LMOD1 Homo_sapiens        | SGPTKPSEGPAKVEEEAAPSIFDEPLERVKNNDPEMTEVNVNNSDCITNEILVRFTEALE      |
| 01:9606 8118 NM_012134 LMOD1 Homo_sapiens          | SGPTKPSEGPAKVEEEAAPSIFDEPLERVKNNDPEMTEVNVNNSDCITNEILVRFTEALE      |
| 04:9913 8118 NM_001083715 LMOD1 Bos_taurus         | GAPAKPADGPAKAEEEATPSIFDEPLERVKSNDPEVTEVNVNNSDCITTEILVRF AEALE     |
| 06:10116 8118 NM_001107179 Lmod1 Rattus_norvegicus | SGPSKPSDGGQARAEEEAAPSIFDEPLEKVKNNDPEMTEVNVNNSDCITNEILVRFTEALE     |
| 07:10090 8118 NM_053106 Lmod1 Mus_musculus         | SCPNKPSDGGQARAEEEAAPSIFDEPLEKVKNNDPEMTEVNVNNSDCITNEILVRFTEALE     |
| 00:1 Ac-AATAHFAKMSR                                | -----                                                             |
| 01:9606 8118 0#NP_036266 LMOD1 Homo_sapiens        | FNTVVKLFALANTRADDHVAF AIAIMLKANKTITSLNLD SNHITGKGILAI FRALLQNNNT  |
| 01:9606 8118 NM_012134 LMOD1 Homo_sapiens          | FNTVVKLFALANTRADDHVAF AIAIMLKANKTITSLNLD SNHITGKGILAI FRALLQNNNT  |
| 04:9913 8118 NM_001083715 LMOD1 Bos_taurus         | FNTAVKV FALANTRADDHVAF AIAIMLKANKTITSLNLD SNHITSGKILAI FRALLQNSS  |
| 06:10116 8118 NM_001107179 Lmod1 Rattus_norvegicus | FNTVVKV FALANTRADDHVAF AIAIMLKANKTITSLNLD SNHITGKGILAI FRALLQNNNT |
| 07:10090 8118 NM_053106 Lmod1 Mus_musculus         | FNTVVKV FALANTRADDHVAF AIAIMLKANKTITSLNLD SNHITGKGILAI FRALLQNNNT |
| 00:1 Ac-AATAHFAKMSR                                | -----                                                             |
| 01:9606 8118 0#NP_036266 LMOD1 Homo_sapiens        | LTELRFHNQRHICGGKTEMEIAKLLKENTTLLKLGYHFELAGPRMTVTNLLSRNMDKQRQ      |
| 01:9606 8118 NM_012134 LMOD1 Homo_sapiens          | LTELRFHNQRHICGGKTEMEIAKLLKENTTLLKLGYHFELAGPRMTVTNLLSRNMDKQRQ      |
| 04:9913 8118 NM_001083715 LMOD1 Bos_taurus         | LTELRFHNQRHICGGKTEMEMAKLLKENTTLLKLGYHFELAGPRMTVTNLLSRNMDRQRQ      |
| 06:10116 8118 NM_001107179 Lmod1 Rattus_norvegicus | LTELRFHNQRHICGGKTEMEIAKLLKENTTLLKLGYHFELAGPRMTVTNLLSRNMDKQRQ      |
| 07:10090 8118 NM_053106 Lmod1 Mus_musculus         | LTELRFHNQRHICGGKTEMEIAKLLKENTTLLKLGYHFELAGPRMTVTNLLSRNMDKQRQ      |
| 00:1 Ac-AATAHFAKMSR                                | -----                                                             |
| 01:9606 8118 0#NP_036266 LMOD1 Homo_sapiens        | KRLQEQRQAQEAKEG-----KKDLLEVPKAGAVAKGSPKPSQPSPKPSPKPKGGGAPA        |
| 01:9606 8118 NM_012134 LMOD1 Homo_sapiens          | KRLQEQRQAQEAKEG-----KKDLLEVPKAGAVAKGSPKPSQPSPKPSPKPKGGGAPA        |
| 04:9913 8118 NM_001083715 LMOD1 Bos_taurus         | KRLQEQRQAQEAQAQEAQAGKALLEVPQARPPARGSPRPSLQPPPKAAPKNSPGKGGAPA      |
| 06:10116 8118 NM_001107179 Lmod1 Rattus_norvegicus | KRLQEQRQAQEAASGE-----KKDRLEVPKVGALPKGSPKPSQPSPKSPKSPKSAIIGF       |
| 07:10090 8118 NM_053106 Lmod1 Mus_musculus         | KRLQEQRQAQEAASGE-----KKDRLEVPKVGALAKGSPKPSQPSPKSPKAPKNSPKKAGVPA   |
| 00:1 Ac-AATAHFAKMSR                                | -----                                                             |
| 01:9606 8118 0#NP_036266 LMOD1 Homo_sapiens        | APPPPPPLAPPLIMENLKNSLSPATQRKMGDKVLP AQEKNSRDQLLAAIRSSNLKQLKK      |
| 01:9606 8118 NM_012134 LMOD1 Homo_sapiens          | APPPPPPLAPPLIMENLKNSLSPATQRKMGDKVLP AQEKNSRDQLLAAIRSSNLKQLKK      |

|                                                    |                                                                 |
|----------------------------------------------------|-----------------------------------------------------------------|
| 04:9913 8118 NM_001083715 LMOD1 Bos_taurus         | VPPPPPPPLAPPLIMENLRNSLSPATQRKMGDKALPAQEKN SRDQLLAAIRSSNLKQLKK   |
| 06:10116 8118 NM_001107179 Lmod1 Rattus_norvegicus | ----VNERVAPPLIMENLKNSLSPATQRKMGDKVLP AQEKN SRDQLLAAIRSSNLKQLKK  |
| 07:10090 8118 NM_053106 Lmod1 Mus_musculus         | APPPPPPPPLAPPLIMENLKNSLSPATQRKMGDKVLP AQEKN SRDQLLAAIRSSNLKQLKK |
| 00:1 Ac-AATAHFAKMSR                                | -----                                                           |
| 01:9606 8118 0#NP_036266 LMOD1 Homo_sapiens        | VEVPKLLQ                                                        |
| 01:9606 8118 NM_012134 LMOD1 Homo_sapiens          | VEVPKLLQ                                                        |
| 04:9913 8118 NM_001083715 LMOD1 Bos_taurus         | VEVPKLLQ                                                        |
| 06:10116 8118 NM_001107179 Lmod1 Rattus_norvegicus | AKVPKLLQ                                                        |
| 07:10090 8118 NM_053106 Lmod1 Mus_musculus         | VEVPKLLQ                                                        |

*ZDHHC2*

Ac-AAAVAAAH<sup>3</sup>PAA<sup>3</sup>AQEPVQPGVPGPPSPPR

CLUSTAL O(1.2.1) multiple sequence alignment

|                                                           |                                                               |
|-----------------------------------------------------------|---------------------------------------------------------------|
| 00:1 Ac-AAAVAAAHAAAAQEPVQPGVPGPPSPPR                      | -----AAAVAAAHAAAAQEPVQPGVPGPPSPPR-----                        |
| 01:9606 81667 0#NP_057437 ZDHHC2 Homo_sapiens             | -----GAGSPRRRLGAAGWGSATAAAVAAAHAAAAQEPVQPGVPGPPSPPRSQARGR     |
| 01:9606 81667 NM_016353 ZDHHC2 Homo_sapiens               | AAASARRSSGSPRRPLAAAGWGASATAAAVAAAQPAAPGPVPPGAPGAPSPAPSQAHRG   |
| 06:10116 81667 NM_145096 zdhhc2 Rattus_norvegicus         | -----                                                         |
| 07:10090 81667 NM_178395 Zdhhc2 Mus_musculus              | -----                                                         |
| 09:8364 81667 NM_001078766 zdhhc2 Xenopus_tropicalis      | -----                                                         |
| 10:7955 81667 NM_001013492 zdhhc2 Danio_rerio             | -----                                                         |
| 13:6239 81667 NM_001027861 ZK757.4 Caenorhabditis_elegans | -----                                                         |
| 13:6239 81667 NM_001027862 ZK757.4 Caenorhabditis_elegans | -----                                                         |
| 13:6239 81667 NM_001129279 ZK757.4 Caenorhabditis_elegans | -----                                                         |
| 13:6239 81667 NM_001268109 ZK757.4 Caenorhabditis_elegans | -----                                                         |
| 13:6239 81667 NM_001268110 ZK757.4 Caenorhabditis_elegans | -----                                                         |
| 13:6239 81667 NM_001268111 ZK757.4 Caenorhabditis_elegans | -----                                                         |
| 13:6239 81667 NM_001268112 ZK757.4 Caenorhabditis_elegans | -----                                                         |
| 15:3702 81667 NM_116310 AT4G00840 Arabidopsis_thaliana    | -----KKKVTLNLNYQYQLHDGSSLSSEPSKLRSLTVAPDILRRLFPAR---TR        |
| 00:1 Ac-AAAVAAAHAAAAQEPVQPGVPGPPSPPR                      | -----                                                         |
| 01:9606 81667 0#NP_057437 ZDHHC2 Homo_sapiens             | -----MAPSGPGSSARRRCRRVLYWIPVVFITLLLGWSYYAYAIQLCIV             |
| 01:9606 81667 NM_016353 ZDHHC2 Homo_sapiens               | --RRSW---AGCGWKMAPSGPGSSARRRCRRVLYWIPVVFITLLLGWSYYAYAIQLCIV   |
| 06:10116 81667 NM_145096 zdhhc2 Rattus_norvegicus         | RRRSW---AGVCGWKMAPSGPGG-VRRRCRRVLYWIPVVFISLLLGWCYYAYAIQLCIV   |
| 07:10090 81667 NM_178395 zdhhc2 Mus_musculus              | RRRQSW---AGVCGWKMAPSGSGG-VRRRCRRVLYWIPVVFISLLLGWSYYAYAIQLCIV  |
| 09:8364 81667 NM_001078766 zdhhc2 Xenopus_tropicalis      | -----RSPHRIMAPSGPS-SVRRRCRRCLYWIPVLFISIIVCWSYYAYVQLCIV        |
| 10:7955 81667 NM_001013492 zdhhc2 Danio_rerio             | -----GGNRKMAPSG---SRSFDCWRVLYWIPVLFISLIVAWSYYAYVQLCIE         |
| 13:6239 81667 NM_001027861 ZK757.4 Caenorhabditis_elegans | -----MSCR---DCTRKGGCV-YTTFWLVRFLPVVLVSLATGWGIYAYTYELCIL       |
| 13:6239 81667 NM_001027862 ZK757.4 Caenorhabditis_elegans | -----MCDVFDKVKYKLDDI-LLKYKLVRFLPVVLVSLATGWGIYAYTYELCIL        |
| 13:6239 81667 NM_001129279 ZK757.4 Caenorhabditis_elegans | -----MSC---RDCTRKGGCV-YTTFWLVRFLPVVLVSLATGWGIYAYTYELCIL       |
| 13:6239 81667 NM_001268109 ZK757.4 Caenorhabditis_elegans | -----                                                         |
| 13:6239 81667 NM_001268110 ZK757.4 Caenorhabditis_elegans | -----MSC---RDCTRKGGCV-YTTFWLVRFLPVVLVSLATGWGIYAYTYELCIL       |
| 13:6239 81667 NM_001268111 ZK757.4 Caenorhabditis_elegans | -----                                                         |
| 13:6239 81667 NM_001268112 ZK757.4 Caenorhabditis_elegans | -----                                                         |
| 15:3702 81667 NM_116310 AT4G00840 Arabidopsis_thaliana    | RIVRILPLTRLEMNLFRCFSG-----LKVLGYFMILLVVAVVGVSYAVVVSTWWP       |
| 00:1 Ac-AAAVAAAHAAAAQEPVQPGVPGPPSPPR                      | SM--E---NTGEQVVCLMAYHLLFAMFVWSYWKTIFTLPMNPSKEFHLSYAEKDLLERE   |
| 01:9606 81667 0#NP_057437 ZDHHC2 Homo_sapiens             | SM--E---NTGEQVVCLMAYHLLFAMFVWSYWKTIFTLPMNPSKEFHLSYAEKDLLERE   |
| 01:9606 81667 NM_016353 ZDHHC2 Homo_sapiens               | SM--E---NIGEQQVCLMAYHLLFAMFVWSYWKTIFTLPMNPSKEFHLSYAEKDLLERE   |
| 06:10116 81667 NM_145096 zdhhc2 Rattus_norvegicus         | SM--E---NIGEQQVCLMAYHLLFAMFVWSYWKTIFTLPMNPSKEFHLSYAEKDLLERE   |
| 07:10090 81667 NM_178395 Zdhhc2 Mus_musculus              | TM--D---NIAEKLLCLIAEHFFLLHFVWSYWKTIFTLPMNPAKEFHLSYSDKELLERE   |
| 09:8364 81667 NM_001078766 zdhhc2 Xenopus_tropicalis      | TI--E---NMGEKTVYLLIYHLLFLMFVWSYQWTIYSKPMNPLKEFHLSHVDKELLERE   |
| 10:7955 81667 NM_001013492 zdhhc2 Danio_rerio             | SI--D---NWPQRIIYLFIFYALLILFYTSYLRTVYTKAWKPPQKYCIEGASKATYESV   |
| 13:6239 81667 NM_001027861 ZK757.4 Caenorhabditis_elegans | SI--D---NWPQRIIYLFIFYALLILFYTSYLRTVYTKAWKPPQKYCIEGASKATYESV   |
| 13:6239 81667 NM_001027862 ZK757.4 Caenorhabditis_elegans | -----                                                         |
| 13:6239 81667 NM_001129279 ZK757.4 Caenorhabditis_elegans | SI--D---NWPQRIIYLFIFYALLILFYTSYLRTVYTKAWKPPQKYCIEGASKATYESV   |
| 13:6239 81667 NM_001268109 ZK757.4 Caenorhabditis_elegans | -----                                                         |
| 13:6239 81667 NM_001268110 ZK757.4 Caenorhabditis_elegans | -----                                                         |
| 13:6239 81667 NM_001268111 ZK757.4 Caenorhabditis_elegans | -----                                                         |
| 13:6239 81667 NM_001268112 ZK757.4 Caenorhabditis_elegans | -----                                                         |
| 15:3702 81667 NM_116310 AT4G00840 Arabidopsis_thaliana    | ILIRGDHGALSALAALIIFVFHFLIMLLWSYFTTVTFDPSGVPEHFRREMGGGDSLEAG   |
| 00:1 Ac-AAAVAAAHAAAAQEPVQPGVPGPPSPPR                      | -----                                                         |
| 01:9606 81667 0#NP_057437 ZDHHC2 Homo_sapiens             | PRGEAHQEVL-R--RAAKDLPIYTRTMSGAIRYCDRCQLIKPDRCHHCSVCDKCIILKMDH |
| 01:9606 81667 NM_016353 ZDHHC2 Homo_sapiens               | PRGEAHQEVL-R--RAAKDLPIYTRTMSGAIRYCDRCQLIKPDRCHHCSVCDKCIILKMDH |
| 06:10116 81667 NM_145096 zdhhc2 Rattus_norvegicus         | PRGEAHQEVL-R--RAAKDLPIYTRTMSGAIRYCDRCRLIKPDRCHHCSVCDKCIILKMDH |
| 07:10090 81667 NM_178395 zdhhc2 Mus_musculus              | PRGEAHQEVL-R--RAAKDLPIYTRTMSGAIRYCDRCQLIKPDRCHHCSVCDKCIILKMDH |
| 09:8364 81667 NM_001078766 zdhhc2 Xenopus_tropicalis      | PRGESQQDIL-R--RLAKDLPVYTRTMSGAIRYCDRCQLVKPDRCHHCSVCDKCIILKMDH |
| 10:7955 81667 NM_001013492 zdhhc2 Danio_rerio             | DRRESQQEIL-R--RIAKDLPIYTRTMSGAIRYCDRCLLLPDRCHHCSACDMCIILKMDH  |
| 13:6239 81667 NM_001027861 ZK757.4 Caenorhabditis_elegans | KDDERQLQLFLSDIARERDLTLLVRGFDHGIRFCDKCCCICKPDRSHHCSMCEQCVLKFDH |
| 13:6239 81667 NM_001027862 ZK757.4 Caenorhabditis_elegans | KDDERQLQLFLSDIARERDLTLLVRGFDHGIRFCDKCCCICKPDRSHHCSMCEQCVLKFDH |
| 13:6239 81667 NM_001129279 ZK757.4 Caenorhabditis_elegans | -----                                                         |
| 13:6239 81667 NM_001268109 ZK757.4 Caenorhabditis_elegans | -----                                                         |
| 13:6239 81667 NM_001268110 ZK757.4 Caenorhabditis_elegans | -----                                                         |
| 13:6239 81667 NM_001268111 ZK757.4 Caenorhabditis_elegans | -----                                                         |
| 13:6239 81667 NM_001268112 ZK757.4 Caenorhabditis_elegans | KDDERQLQLFLSDIARERDLTLLVRGFDHGIRFCDKCCCICKPDRSHHCSMCEQCVLKFDH |
| 15:3702 81667 NM_116310 AT4G00840 Arabidopsis_thaliana    | T-----STDQGAFGSLGYCTKCRNVKPPRCHHCSVQCRCVLKMDH                 |
| 00:1 Ac-AAAVAAAHAAAAQEPVQPGVPGPPSPPR                      | -----                                                         |
| 01:9606 81667 0#NP_057437 ZDHHC2 Homo_sapiens             | HCPWVNNCVGFSGNYKFFLLFLAYSLLYCLFIAATDLQYFIKFWTNGLPD-----       |
| 01:9606 81667 NM_016353 ZDHHC2 Homo_sapiens               | HCPWVNNCVGFSGNYKFFLLFLAYSLLYCLFIAATDLQYFIKFWTNGLPD-----       |
| 06:10116 81667 NM_145096 zdhhc2 Rattus_norvegicus         | HCPWVNNCVGFSGNYKFFLLFLAYSLLYCLFIAATDLQYFIKFWTNGLPD-----       |
| 07:10090 81667 NM_178395 Zdhhc2 Mus_musculus              | HCPWVNNCVGFSGNYKFFLLFLAYSLLYCLFIAATDLQYFIKFWTNGLPD-----       |
| 09:8364 81667 NM_001078766 zdhhc2 Xenopus_tropicalis      | HCPWVNNCVGFSGNYKFFLLFLAYSLLYCLFIVATDLQYFVFWTNGLPD-----        |
| 10:7955 81667 NM_001013492 zdhhc2 Danio_rerio             | HCPWVNNCVGFANYKFFMLFLAYSLLYCLFVTTATDMQYFIQFWTNGLPD-----       |
| 13:6239 81667 NM_001027861 ZK757.4 Caenorhabditis_elegans | HCPWVNNCVNFNGYKYFILFLAYGFIFCIWIAATTLPSFIDFWRHEYDMNKKQYDSIDSV  |
| 13:6239 81667 NM_001027862 ZK757.4 Caenorhabditis_elegans | HCPWVNNCVNFNGYKYFILFLAYGFIFCIWIAATTLPSFIDFWRHEYDMNKKQYDSIDSV  |
| 13:6239 81667 NM_001129279 ZK757.4 Caenorhabditis_elegans | HCPWVNNCVNFNGYKYFILFLAYGFIFCIWIAATTLPSFIDFWRHEYDMNKKQYDSIDSV  |
| 13:6239 81667 NM_001268109 ZK757.4 Caenorhabditis_elegans | -----                                                         |
| 13:6239 81667 NM_001268110 ZK757.4 Caenorhabditis_elegans | -----                                                         |
| 13:6239 81667 NM_001268111 ZK757.4 Caenorhabditis_elegans | HCPWVNNCVNFNGYKYFILFLAYGFIFCIWIAATTLPSFIDFWRHEYDMNKK-----     |
| 13:6239 81667 NM_001268112 ZK757.4 Caenorhabditis_elegans | -----                                                         |
| 15:3702 81667 NM_116310 AT4G00840 Arabidopsis_thaliana    | HCVWIVNCVGNARYKFFLLFLFYTFLETMLDVIVLLPSFIEFFSQAIKHSS-----      |

00:1|Ac-AAAVAAAHAAAAQEPVQPGVPGPPSPPR  
01:9606|81667|0#NP\_057437|ZDHHC2|Homo\_sapiens  
01:9606|81667|NM\_016353|ZDHHC2|Homo\_sapiens  
06:10116|81667|NM\_145096|Zdhhc2|Rattus\_norvegicus  
07:10090|81667|NM\_178395|Zdhhc2|Mus\_musculus  
09:8364|81667|NM\_001078766|Zdhhc2|Xenopus\_tropicalis  
10:7955|81667|NM\_001013492|Zdhhc2|Danio\_rerio  
13:6239|81667|NM\_001027861|ZK757.4|Caenorhabditis\_elegans  
13:6239|81667|NM\_001027862|ZK757.4|Caenorhabditis\_elegans  
13:6239|81667|NM\_001129279|ZK757.4|Caenorhabditis\_elegans  
13:6239|81667|NM\_001268109|ZK757.4|Caenorhabditis\_elegans  
13:6239|81667|NM\_001268110|ZK757.4|Caenorhabditis\_elegans  
13:6239|81667|NM\_001268111|ZK757.4|Caenorhabditis\_elegans  
13:6239|81667|NM\_001268112|ZK757.4|Caenorhabditis\_elegans  
15:3702|81667|NM\_116310|AT4G00840|Arabidopsis\_thaliana

00:1|Ac-AAAVAAAHAAAAQEPVQPGVPGPPSPPR  
01:9606|81667|0#NP\_057437|ZDHHC2|Homo\_sapiens  
01:9606|81667|NM\_016353|ZDHHC2|Homo\_sapiens  
06:10116|81667|NM\_145096|Zdhhc2|Rattus\_norvegicus  
07:10090|81667|NM\_178395|Zdhhc2|Mus\_musculus  
09:8364|81667|NM\_001078766|Zdhhc2|Xenopus\_tropicalis  
10:7955|81667|NM\_001013492|Zdhhc2|Danio\_rerio  
13:6239|81667|NM\_001027861|ZK757.4|Caenorhabditis\_elegans  
13:6239|81667|NM\_001027862|ZK757.4|Caenorhabditis\_elegans  
13:6239|81667|NM\_001129279|ZK757.4|Caenorhabditis\_elegans  
13:6239|81667|NM\_001268109|ZK757.4|Caenorhabditis\_elegans  
13:6239|81667|NM\_001268110|ZK757.4|Caenorhabditis\_elegans  
13:6239|81667|NM\_001268111|ZK757.4|Caenorhabditis\_elegans  
13:6239|81667|NM\_001268112|ZK757.4|Caenorhabditis\_elegans  
15:3702|81667|NM\_116310|AT4G00840|Arabidopsis\_thaliana

00:1|Ac-AAAVAAAHAAAAQEPVQPGVPGPPSPPR  
01:9606|81667|0#NP\_057437|ZDHHC2|Homo\_sapiens  
01:9606|81667|NM\_016353|ZDHHC2|Homo\_sapiens  
06:10116|81667|NM\_145096|Zdhhc2|Rattus\_norvegicus  
07:10090|81667|NM\_178395|Zdhhc2|Mus\_musculus  
09:8364|81667|NM\_001078766|Zdhhc2|Xenopus\_tropicalis  
10:7955|81667|NM\_001013492|Zdhhc2|Danio\_rerio  
13:6239|81667|NM\_001027861|ZK757.4|Caenorhabditis\_elegans  
13:6239|81667|NM\_001027862|ZK757.4|Caenorhabditis\_elegans  
13:6239|81667|NM\_001129279|ZK757.4|Caenorhabditis\_elegans  
13:6239|81667|NM\_001268109|ZK757.4|Caenorhabditis\_elegans  
13:6239|81667|NM\_001268110|ZK757.4|Caenorhabditis\_elegans  
13:6239|81667|NM\_001268111|ZK757.4|Caenorhabditis\_elegans  
13:6239|81667|NM\_001268112|ZK757.4|Caenorhabditis\_elegans  
15:3702|81667|NM\_116310|AT4G00840|Arabidopsis\_thaliana

00:1|Ac-AAAVAAAHAAAAQEPVQPGVPGPPSPPR  
01:9606|81667|0#NP\_057437|ZDHHC2|Homo\_sapiens  
01:9606|81667|NM\_016353|ZDHHC2|Homo\_sapiens  
06:10116|81667|NM\_145096|Zdhhc2|Rattus\_norvegicus  
07:10090|81667|NM\_178395|Zdhhc2|Mus\_musculus  
09:8364|81667|NM\_001078766|Zdhhc2|Xenopus\_tropicalis  
10:7955|81667|NM\_001013492|Zdhhc2|Danio\_rerio  
13:6239|81667|NM\_001027861|ZK757.4|Caenorhabditis\_elegans  
13:6239|81667|NM\_001027862|ZK757.4|Caenorhabditis\_elegans  
13:6239|81667|NM\_001129279|ZK757.4|Caenorhabditis\_elegans  
13:6239|81667|NM\_001268109|ZK757.4|Caenorhabditis\_elegans  
13:6239|81667|NM\_001268110|ZK757.4|Caenorhabditis\_elegans  
13:6239|81667|NM\_001268111|ZK757.4|Caenorhabditis\_elegans  
13:6239|81667|NM\_001268112|ZK757.4|Caenorhabditis\_elegans  
15:3702|81667|NM\_116310|AT4G00840|Arabidopsis\_thaliana

-----  
-----TQAKFH-IMFLFFAAAMFSVLSSSLFGYHCWLVSKNKSTLEAFRSPVF  
-----TQAKFH-IMFLFFAAAMFSVLSSSLFGYHCWLVSKNKSTLEAFRSPVF  
-----TQAKFH-IMFLFFAAAMFSVLSSSLFGYHCWLVSKNKSTLEAFRNPVF  
-----TQAKFH-IMFLFFAAAMFSVLSSSLFGYHCWLVSKNKSTLEAFRNPVF  
-----TQAKFH-IMFLFFAAAMFSVLSSSLFGYHCWLVCNKRSTLEAFRAPVF  
-----TQAKFH-IMFLFFAASTFSVSLAFLFAYHCWLVCNKRSTLEAFRAPAF  
IQRNLKHLHTVLSNGRFP-LVFLLFLSCMFSLSLSFLFFYHLYLTAKNRTTVESFRAPMI  
IQRNLKHLHTVLSNGRFP-LVFLLFLSCMFSLSLSFLFFYHLYLTAKNRTTVESFRAPMI  
-----MI  
-----NGRFP-LVFLLFLSCMFSLSLSFLFFYHLYLTAKNRTTVESFRAPMI  
-----MFSLSLSFLFFYHLYLTAKNRTTVESFRAPMI  
-----PGKLASLVLAFLVLFNFAFVLSLLCFVVMHISLLSSNTTSVEVHE----

-----  
RHGTDKNGFSLGFSKNMRQVFGDEKKYWLLPIFSSLG-----DGCSFPTCLVNQDPEQ  
RHGTDKNGFSLGFSKNMRQVFGDEKKYWLLPIFSSLG-----DGCSFPTCLVNQDPEQ  
RHGTDKNGFSLGFSKNMRQVFGDEKKYWLLPIFSSQG-----DGCSFPTCLVNQDPEQ  
RHGTDKNGFSLGFSKNMRQVFGDEKKYWLLPVFSSQG-----DGCSFPTCLVNQDPEQ  
RHGTDKNGFSLGFSKNLRQVFGDEKKYWLLPVFTSLG-----DGCSFPTCLVNQDLEQ  
QHGTDKNGFSLGAYKNFRQVFGDEKKYWLLPIFSSLG-----DGCSFPTCLVNPDPPEQ  
DGKYAKDAFNHGIRANYREIFGSHPLYWFLPVPSIG-----DGCKFVMNDMTAMSAA  
DGKYAKDAFNHGIRANYREIFGSHPLYWFLPVPSIG-----DGCKFVMNDMTAMSAA  
DGKYAKDAFNHGIRANYREIFGSHPLYWFLPVPSIG-----DGVEFKKWTMDAALT  
DGKYAKDAFNHGIRANYREIFGSHPLYWFLPVPSIG-----DGCKFVMNDMTAMSAA  
-----MNDMTAMSAA  
DGKYAKDAFNHGIRANYREIFGSHPLYWFLPVPSIG-----DGCKFVMNDMTAMSAA  
DGKYAKDAFNHGIRANYREIFGSHPLYWFLPVPSIG-----DGCKFVMNDMTAMSAA  
KNGEVRWKYDLGKKKNFEQVFGKKKAFWLLPLYSKDDIDNITSLEGLEFPTCSDIDP---

-----  
ASTPAGLNSTAKN-LENHQFPAKPLRESQSHLLTDSQSWTESSINPGKCKAGMSNPALTM  
ASTPAGLNSTAKN-LENHQFPAKPLRESQSHLLTDSQSWTESSINPGKCKAGMSNPALTM  
PSTPAGLNSTAKN-PENHQFPAKPLRESQSHLLTDSQTWTENSSNSGRCKAGMSNPALTM  
PSTPAGLNSTVKN-PENHQFPAKPLRESQSHLLKDSQTWTETESSANPGKCKAGMSNPALTM  
ASTPTGANTATKS-IENHPFPAKPLRESQSHLLTDSQSWNENNGNSEKGLGMSNPGLTI  
PSIIPPGRNPSVKASAGESHPFPKPLRESQSRLLNNGQT----DGSED RDKRGTSNPALT  
AGNQVFVEMGNVPNGQSHAH--PPIAQHHINLYSE-----QSSSASEKEIKSVDEITE  
AGNQVFVEMGNVPNGQSHAH--PPIAQHHINLYSE-----QSSSASEKEIKSVDEITE  
HG NRNG-----PLRYSLLQ--QRDESEM QHLYSE-----DEEE-DLNVRIV-----  
AGNQVFVEMGNVPNGQSHAH--PPIAQHHINLYSE-----QSSSASEKEIKSVDEITE  
AGNQVFVEMGNVPNGQSHAH--PPIAQHHINLYSE-----QSSSASEKEIKSVDEITE  
AGNQVFVEMGNVPNGQSHAH--PPIAQHHINLYSE-----QSSSASEKEIKSVDEITE  
AGNQVFVEMGNVPNGQSHAH--PPIAQHHINLYSE-----QSSSASEKEIKSVDEITE  
-----

-----  
ENET-----  
ENET-----  
ENET-----  
ENET-----  
ENET-----  
EKET-----  
RSQVSTATTASPSHDSVTA  
RSQVSTATTASPSHDSVTA  
-----  
RSQVSTATTASPSHDSVTA  
RSQVSTATTASPSHDSVTA  
RSQVSTATTASPSHDSVTA  
RSQVSTATTASPSHDSVTA  
RSQVSTATTASPSHDSVTA  
-----

*STOM*

Ac-GECD CVSGSMAEKR

```

00:1|Ac-GECDVSGSMAEKR
01:9606 |81681|0#NP_001257455|STOM|Homo_sapiens
01:9606 |81681|0#NP_001257456|STOM|Homo_sapiens
01:9606 |81681|0#NP_004090|STOM|Homo_sapiens
01:9606 |81681|0#NP_937837|STOM|Homo_sapiens
01:9606 |81681|NM_001270526|STOM|Homo_sapiens
01:9606 |81681|NM_001270527|STOM|Homo_sapiens
01:9606 |81681|NM_004099|STOM|Homo_sapiens
01:9606 |81681|NM_198194|STOM|Homo_sapiens
03:9544 |81681|NM_001266229|STOM|Macaca_mulatta
04:9913 |81681|NM_001105473|STOM|Bos_taurus
05:9615 |81681|NM_001142670|STOM|Canis_lupus_familiaris
06:10116|81681|NM_001011965|Stom|Rattus_norvegicus
07:10090|81681|NM_013515|Stom|MUS_musculus
10:7955 |81681|NM_131758|stom|Danio_rerio
12:7227 |81681|NM_001259698|CG42540|Drosophila_melanogaster
12:7227 |81681|NM_001274490|CG42540|Drosophila_melanogaster
12:7227 |81681|NM_001274491|CG42540|Drosophila_melanogaster
12:7227 |81681|NM_001274492|CG42540|Drosophila_melanogaster
12:7227 |81681|NM_001300007|CG42540|Drosophila_melanogaster
12:7227 |81681|NM_139660|CG42540|Drosophila_melanogaster
12:7227 |81681|NM_144080|CG42540|Drosophila_melanogaster
12:7227 |81681|NM_168095|CG42540|Drosophila_melanogaster
12:7227 |81681|NM_168096|CG42540|Drosophila_melanogaster
13:6239 |81681|NM_001270091|sto-2|Caenorhabditis_elegans
13:6239 |81681|NM_001270092|sto-2|Caenorhabditis_elegans
13:6239 |81681|NM_001270093|sto-2|Caenorhabditis_elegans
13:6239 |81681|NM_001270094|sto-2|Caenorhabditis_elegans

00:1|Ac-GECDVSGSMAEKR
01:9606 |81681|0#NP_001257455|STOM|Homo_sapiens
01:9606 |81681|0#NP_001257456|STOM|Homo_sapiens
01:9606 |81681|0#NP_004090|STOM|Homo_sapiens
01:9606 |81681|0#NP_937837|STOM|Homo_sapiens
01:9606 |81681|NM_001270526|STOM|Homo_sapiens
01:9606 |81681|NM_001270527|STOM|Homo_sapiens
01:9606 |81681|NM_004099|STOM|Homo_sapiens
01:9606 |81681|NM_198194|STOM|Homo_sapiens
03:9544 |81681|NM_001266229|STOM|Macaca_mulatta
04:9913 |81681|NM_001105473|STOM|Bos_taurus
05:9615 |81681|NM_001142670|STOM|Canis_lupus_familiaris
06:10116|81681|NM_001011965|Stom|Rattus_norvegicus
07:10090|81681|NM_013515|Stom|MUS_musculus
10:7955 |81681|NM_131758|stom|Danio_rerio
12:7227 |81681|NM_001259698|CG42540|Drosophila_melanogaster
12:7227 |81681|NM_001274490|CG42540|Drosophila_melanogaster
12:7227 |81681|NM_001274491|CG42540|Drosophila_melanogaster
12:7227 |81681|NM_001274492|CG42540|Drosophila_melanogaster
12:7227 |81681|NM_001300007|CG42540|Drosophila_melanogaster
12:7227 |81681|NM_139660|CG42540|Drosophila_melanogaster
12:7227 |81681|NM_144080|CG42540|Drosophila_melanogaster
12:7227 |81681|NM_168095|CG42540|Drosophila_melanogaster
12:7227 |81681|NM_168096|CG42540|Drosophila_melanogaster
13:6239 |81681|NM_001270091|sto-2|Caenorhabditis_elegans
13:6239 |81681|NM_001270092|sto-2|Caenorhabditis_elegans
13:6239 |81681|NM_001270093|sto-2|Caenorhabditis_elegans
13:6239 |81681|NM_001270094|sto-2|Caenorhabditis_elegans

00:1|Ac-GECDVSGSMAEKR
01:9606 |81681|0#NP_001257455|STOM|Homo_sapiens
01:9606 |81681|0#NP_001257456|STOM|Homo_sapiens
01:9606 |81681|0#NP_004090|STOM|Homo_sapiens
01:9606 |81681|0#NP_937837|STOM|Homo_sapiens
01:9606 |81681|NM_001270526|STOM|Homo_sapiens
01:9606 |81681|NM_001270527|STOM|Homo_sapiens
01:9606 |81681|NM_004099|STOM|Homo_sapiens
01:9606 |81681|NM_198194|STOM|Homo_sapiens
03:9544 |81681|NM_001266229|STOM|Macaca_mulatta
04:9913 |81681|NM_001105473|STOM|Bos_taurus
05:9615 |81681|NM_001142670|STOM|Canis_lupus_familiaris
06:10116|81681|NM_001011965|Stom|Rattus_norvegicus
07:10090|81681|NM_013515|Stom|MUS_musculus
10:7955 |81681|NM_131758|stom|Danio_rerio
12:7227 |81681|NM_001259698|CG42540|Drosophila_melanogaster
12:7227 |81681|NM_001274490|CG42540|Drosophila_melanogaster
12:7227 |81681|NM_001274491|CG42540|Drosophila_melanogaster
12:7227 |81681|NM_001274492|CG42540|Drosophila_melanogaster
12:7227 |81681|NM_001300007|CG42540|Drosophila_melanogaster
12:7227 |81681|NM_139660|CG42540|Drosophila_melanogaster
12:7227 |81681|NM_144080|CG42540|Drosophila_melanogaster
12:7227 |81681|NM_168095|CG42540|Drosophila_melanogaster
12:7227 |81681|NM_168096|CG42540|Drosophila_melanogaster
13:6239 |81681|NM_001270091|sto-2|Caenorhabditis_elegans
13:6239 |81681|NM_001270092|sto-2|Caenorhabditis_elegans
13:6239 |81681|NM_001270093|sto-2|Caenorhabditis_elegans
13:6239 |81681|NM_001270094|sto-2|Caenorhabditis_elegans
```





|         |       |              |         |                         |                            |    |
|---------|-------|--------------|---------|-------------------------|----------------------------|----|
| 12:7227 | 81681 | NM_001259698 | CG42540 | Drosophila_melanogaster | EASEVIGDSPAALQLRYLQTLNTISA | EA |
| 12:7227 | 81681 | NM_001274490 | CG42540 | Drosophila_melanogaster | EASEVIGDSPAALQLRYLQTLNTISA | EA |
| 12:7227 | 81681 | NM_001274491 | CG42540 | Drosophila_melanogaster | EASEVIGDSPAALQLRYLQTLNTISA | EA |
| 12:7227 | 81681 | NM_001274492 | CG42540 | Drosophila_melanogaster | EASEVIGDSPAALQLRYLQTLNTISA | EA |
| 12:7227 | 81681 | NM_001300007 | CG42540 | Drosophila_melanogaster | EASEVIGDSPAALQLRYLQTLNTISA | EA |
| 12:7227 | 81681 | NM_139660    | CG42540 | Drosophila_melanogaster | EASEVIGDSPAALQLRYLQTLNTISA | EA |
| 12:7227 | 81681 | NM_144080    | CG42540 | Drosophila_melanogaster | EASEVIGDSPAALQLRYLQTLNTISA | EA |
| 12:7227 | 81681 | NM_168095    | CG42540 | Drosophila_melanogaster | EASEVIGDSPAALQLRYLQTLNTISA | EA |
| 12:7227 | 81681 | NM_168096    | CG42540 | Drosophila_melanogaster | EASEVIGDSPAALQLRYLQTLNTISA | EA |
| 13:6239 | 81681 | NM_001270091 | sto-2   | Caenorhabditis_elegans  | DAASVIAQSPAALQLRYLQTLNSVAA | DA |
| 13:6239 | 81681 | NM_001270092 | sto-2   | Caenorhabditis_elegans  | DAASVIAQSPAALQLRYLQTLNSVAA | DA |
| 13:6239 | 81681 | NM_001270093 | sto-2   | Caenorhabditis_elegans  | DAASVIAQSPAALQLRYLQTLNSVAA | DA |
| 13:6239 | 81681 | NM_001270094 | sto-2   | Caenorhabditis_elegans  | DAASVIAQSPAALQLRYLQTLNSVAA | DA |

|          |                   |                |         |                         |                            |    |
|----------|-------------------|----------------|---------|-------------------------|----------------------------|----|
| 00:1     | Ac-GECDCVSGSMAEKR |                |         |                         |                            |    |
| 01:9606  | 81681             | 0#NP_001257455 | STOM    | Homo_sapiens            |                            |    |
| 01:9606  | 81681             | 0#NP_001257456 | STOM    | Homo_sapiens            |                            |    |
| 01:9606  | 81681             | 0#NP_004090    | STOM    | Homo_sapiens            |                            |    |
| 01:9606  | 81681             | 0#NP_937837    | STOM    | Homo_sapiens            |                            |    |
| 01:9606  | 81681             | NM_001270526   | STOM    | Homo_sapiens            |                            |    |
| 01:9606  | 81681             | NM_001270527   | STOM    | Homo_sapiens            |                            |    |
| 01:9606  | 81681             | NM_004099      | STOM    | Homo_sapiens            |                            |    |
| 01:9606  | 81681             | NM_198194      | STOM    | Homo_sapiens            |                            |    |
| 03:9544  | 81681             | NM_001266229   | STOM    | Macaca_mulatta          |                            |    |
| 04:9913  | 81681             | NM_001105473   | STOM    | Bos_taurus              |                            |    |
| 05:9615  | 81681             | NM_001142670   | STOM    | Canis_lupus_familiaris  |                            |    |
| 06:10116 | 81681             | NM_001011965   | Stom    | Rattus_norvegicus       |                            |    |
| 07:10090 | 81681             | NM_013515      | Stom    | Mus_musculus            |                            |    |
| 10:7955  | 81681             | NM_131758      | stom    | Danio_rerio             |                            |    |
| 12:7227  | 81681             | NM_001259698   | CG42540 | Drosophila_melanogaster | AAIGNTPPPLQLAPQQQMGQQQQPQY | AA |
| 12:7227  | 81681             | NM_001274490   | CG42540 | Drosophila_melanogaster | AAIGNTPPPLQLAPQQQMGQQQQPQY | AA |
| 12:7227  | 81681             | NM_001274491   | CG42540 | Drosophila_melanogaster | AAIGNTPPPLQLAPQQQMGQQQQPQY | AA |
| 12:7227  | 81681             | NM_001274492   | CG42540 | Drosophila_melanogaster | AAIGNTPPPLQLAPQQQMGQQQQPQY | AA |
| 12:7227  | 81681             | NM_001300007   | CG42540 | Drosophila_melanogaster | AAIGNTPPPLQLAPQQQMGQQQQPQY | AA |
| 12:7227  | 81681             | NM_139660      | CG42540 | Drosophila_melanogaster | AAIGNTPPPLQLAPQQQMGQQQQPQY | AA |
| 12:7227  | 81681             | NM_144080      | CG42540 | Drosophila_melanogaster | AAIGNTPPPLQLAPQQQMGQQQQPQY | AA |
| 12:7227  | 81681             | NM_168095      | CG42540 | Drosophila_melanogaster | AAIGNTPPPLQLAPQQQMGQQQQPQY | AA |
| 12:7227  | 81681             | NM_168096      | CG42540 | Drosophila_melanogaster | AAIGNTPPPLQLAPQQQMGQQQQPQY | AA |
| 13:6239  | 81681             | NM_001270091   | sto-2   | Caenorhabditis_elegans  | AAIGNTPPPLQLAPQQQMGQQQQPQY | AA |
| 13:6239  | 81681             | NM_001270092   | sto-2   | Caenorhabditis_elegans  |                            |    |
| 13:6239  | 81681             | NM_001270093   | sto-2   | Caenorhabditis_elegans  |                            |    |
| 13:6239  | 81681             | NM_001270094   | sto-2   | Caenorhabditis_elegans  |                            |    |

|          |                   |                |         |                         |        |  |
|----------|-------------------|----------------|---------|-------------------------|--------|--|
| 00:1     | Ac-GECDCVSGSMAEKR |                |         |                         |        |  |
| 01:9606  | 81681             | 0#NP_001257455 | STOM    | Homo_sapiens            |        |  |
| 01:9606  | 81681             | 0#NP_001257456 | STOM    | Homo_sapiens            |        |  |
| 01:9606  | 81681             | 0#NP_004090    | STOM    | Homo_sapiens            |        |  |
| 01:9606  | 81681             | 0#NP_937837    | STOM    | Homo_sapiens            |        |  |
| 01:9606  | 81681             | NM_001270526   | STOM    | Homo_sapiens            |        |  |
| 01:9606  | 81681             | NM_001270527   | STOM    | Homo_sapiens            |        |  |
| 01:9606  | 81681             | NM_004099      | STOM    | Homo_sapiens            |        |  |
| 01:9606  | 81681             | NM_198194      | STOM    | Homo_sapiens            |        |  |
| 03:9544  | 81681             | NM_001266229   | STOM    | Macaca_mulatta          |        |  |
| 04:9913  | 81681             | NM_001105473   | STOM    | Bos_taurus              |        |  |
| 05:9615  | 81681             | NM_001142670   | STOM    | Canis_lupus_familiaris  |        |  |
| 06:10116 | 81681             | NM_001011965   | Stom    | Rattus_norvegicus       |        |  |
| 07:10090 | 81681             | NM_013515      | Stom    | Mus_musculus            |        |  |
| 10:7955  | 81681             | NM_131758      | stom    | Danio_rerio             |        |  |
| 12:7227  | 81681             | NM_001259698   | CG42540 | Drosophila_melanogaster | QISSAM |  |
| 12:7227  | 81681             | NM_001274490   | CG42540 | Drosophila_melanogaster | QISSAM |  |
| 12:7227  | 81681             | NM_001274491   | CG42540 | Drosophila_melanogaster | QISSAM |  |
| 12:7227  | 81681             | NM_001274492   | CG42540 | Drosophila_melanogaster | QISSAM |  |
| 12:7227  | 81681             | NM_001300007   | CG42540 | Drosophila_melanogaster | QISSAM |  |
| 12:7227  | 81681             | NM_139660      | CG42540 | Drosophila_melanogaster | QISSAM |  |
| 12:7227  | 81681             | NM_144080      | CG42540 | Drosophila_melanogaster | QISSAM |  |
| 12:7227  | 81681             | NM_168095      | CG42540 | Drosophila_melanogaster | QISSAM |  |
| 12:7227  | 81681             | NM_168096      | CG42540 | Drosophila_melanogaster | QISSAM |  |
| 13:6239  | 81681             | NM_001270091   | sto-2   | Caenorhabditis_elegans  |        |  |
| 13:6239  | 81681             | NM_001270092   | sto-2   | Caenorhabditis_elegans  |        |  |
| 13:6239  | 81681             | NM_001270093   | sto-2   | Caenorhabditis_elegans  |        |  |
| 13:6239  | 81681             | NM_001270094   | sto-2   | Caenorhabditis_elegans  |        |  |

*Clorf122*

Ac-AATAALIPLHR

CLUSTAL O(1.2.1) multiple sequence alignment

|                                                          |                                                               |
|----------------------------------------------------------|---------------------------------------------------------------|
| 00:1 Ac-AATAALIPLHR                                      | -----                                                         |
| 01:9606 82588 0#NP_001136198 Clorf122 Homo_sapiens       | -----                                                         |
| 01:9606 82588 0#NP_940848 Clorf122 Homo_sapiens          | -----                                                         |
| 01:9606 82588 NM_001142726 Clorf122 Homo_sapiens         | -----GGTQRAEPPSSSPRRPGRTA                                     |
| 01:9606 82588 NM_198446 Clorf122 Homo_sapiens            | SATRPRTARGLASLRPLRRYTARRAAEQLAQAQRPYSVSVGTATTAPARSSA-----TA   |
| 06:10116 82588 NM_001108678 RGD1559909 Rattus_norvegicus | -----                                                         |
| 00:1 Ac-AATAALIPLHR                                      | -----                                                         |
| 01:9606 82588 0#NP_001136198 Clorf122 Homo_sapiens       | -----                                                         |
| 01:9606 82588 0#NP_940848 Clorf122 Homo_sapiens          | -----MEWGP GSDWSRGEAAGVDRGKAGLG LGGRPPPPQPPRE                 |
| 01:9606 82588 NM_001142726 Clorf122 Homo_sapiens         | YRWGRPPRRRRRAARPRRPAAPRSSRRAPGSRP----ARPRSPGAATAGRRGP----PERD |
| 01:9606 82588 NM_198446 Clorf122 Homo_sapiens            | A-----RSASVQPARSGLAACTAPLPGS-----RNSRAPGAAGAGLGGRKRRP-LRE     |
| 06:10116 82588 NM_001108678 RGD1559909 Rattus_norvegicus | -----                                                         |
| 00:1 Ac-AATAALIPLHR                                      | -----AATAALIPLHR-----                                         |
| 01:9606 82588 0#NP_001136198 Clorf122 Homo_sapiens       | -----MLRQLGRRRPEPAGGGNVS-----                                 |
| 01:9606 82588 0#NP_940848 Clorf122 Homo_sapiens          | ERAQQLLDAVEQRQRQLLDTIAACEEMLRQLGRRRPEPAGGGNVS-----            |
| 01:9606 82588 NM_001142726 Clorf122 Homo_sapiens         | SAGGR-----GDRSGSQAPRSTPRWQPPRPSSP                             |
| 01:9606 82588 NM_198446 Clorf122 Homo_sapiens            | PAGPSL-N-----PTLAATAALIPLHRRAGDIRPGPLPGGSDAPSQLPV-QETRP-RL    |
| 06:10116 82588 NM_001108678 RGD1559909 Rattus_norvegicus | -----                                                         |
| 00:1 Ac-AATAALIPLHR                                      | -----                                                         |
| 01:9606 82588 0#NP_001136198 Clorf122 Homo_sapiens       | -----                                                         |
| 01:9606 82588 0#NP_940848 Clorf122 Homo_sapiens          | -----                                                         |
| 01:9606 82588 NM_001142726 Clorf122 Homo_sapiens         | CTDAPETSAQARFREEVTLPASFR--SRRLGPA----SAPGSL----KGP---RPPGGL   |
| 01:9606 82588 NM_198446 Clorf122 Homo_sapiens            | CAGQL-----KGTTPRRIEGDRWGRGGAQPCEALTQRWGGGRPKGGRWSGRASGD       |
| 06:10116 82588 NM_001108678 RGD1559909 Rattus_norvegicus | -----RGAGAGADCKGVVGGW----HGRRWSGAPAQA                         |
| 00:1 Ac-AATAALIPLHR                                      | -----                                                         |
| 01:9606 82588 0#NP_001136198 Clorf122 Homo_sapiens       | -----AKPGAPP---QPAVSARGGFPKDAGDGAAE--                         |
| 01:9606 82588 0#NP_940848 Clorf122 Homo_sapiens          | -----AKPGAPP---QPAVSARGGFPKDAGDGAAE--                         |
| 01:9606 82588 NM_001142726 Clorf122 Homo_sapiens         | KETGRLP AW-----TAGRRGWGSA--GGHPHSR                            |
| 01:9606 82588 NM_198446 Clorf122 Homo_sapiens            | GMGPGLRLVTGGGCRRGPREGGAGARREATPTAAPGGARPAAGRGGAAPGHHRSL       |
| 06:10116 82588 NM_001108678 RGD1559909 Rattus_norvegicus | GHGGRLP AW-----TVGRRGWGSA--GGHPRSR                            |
| 00:1 Ac-AATAALIPLHR                                      | -----                                                         |
| 01:9606 82588 0#NP_001136198 Clorf122 Homo_sapiens       | -----P-----                                                   |
| 01:9606 82588 0#NP_940848 Clorf122 Homo_sapiens          | -----P-----                                                   |
| 01:9606 82588 NM_001142726 Clorf122 Homo_sapiens         | P-----GRSAPSSCWTRWSSSGSSWTPSQP-----ARRCYGSWAAGARSRLVAGTS      |
| 01:9606 82588 NM_198446 Clorf122 Homo_sapiens            | RGDVTAAAGPPAPGAGW--WRERLSQTWSAPPAGCLRQRRLSKGCWRWSCGALTIPEQNTL |
| 06:10116 82588 NM_001108678 RGD1559909 Rattus_norvegicus | P-----EMNAPSSCWTPWNSSSGSSWTPSP-----ARRCCGSWAGGARNRLVAGTV      |
| 00:1 Ac-AATAALIPLHR                                      | -----                                                         |
| 01:9606 82588 0#NP_001136198 Clorf122 Homo_sapiens       | -----                                                         |
| 01:9606 82588 0#NP_940848 Clorf122 Homo_sapiens          | -----                                                         |
| 01:9606 82588 NM_001142726 Clorf122 Homo_sapiens         | QPN-----LERPPSRLSPPEA--AFQRMLAMELRSPDHPRAEYPDFSPSPGPVAGL      |
| 01:9606 82588 NM_198446 Clorf122 Homo_sapiens            | TSLPPQGRWLDSEQLPSVKGPVFTGSGWYLLALSLEWQ-----LC-----            |
| 06:10116 82588 NM_001108678 RGD1559909 Rattus_norvegicus | QPS-----PERRPSHLYPPEV--AFQRMLAMELQSLDHSLYGHPDFCFPPGPMAGL      |

*ZNF281*

Ac-MEATAAAAAAGPPGLLR

```

00:1|Ac-MEATAAAAAAGPPGLLR-----
01:9606|8270|0#NP_001268222|ZNF281|Homo_sapiens-----MKIGS
01:9606|8270|0#NP_001268223|ZNF281|Homo_sapiens-----MKIGS
01:9606|8270|0#NP_036614|ZNF281|Homo_sapiens-----MKIGS
01:9606|8270|NM_001281293|ZNF281|Homo_sapiens-----LEATAAAAAAGPPGLLRGMKIGS
01:9606|8270|NM_001281294|ZNF281|Homo_sapiens-----LEATAAAAAAGPPGLLRGMKIGS
01:9606|8270|NM_012482|ZNF281|Homo_sapiens-----DTAPRLRSTREAFNSIVERTALFLTGGDGGCGGGGTRLLRGMKIGS
06:10116|8270|NM_001012030|Zfp281|Rattus_norvegicus-----AFNSIVERTALFLTGGDGGCGGGGTRLLRGMKIGS
07:10090|8270|NM_001160251|Zfp281|Mus_musculus-----LEATAAAAAAEPGLLRGMKIGS
07:10090|8270|NM_177643|Zfp281|Mus_musculusAERPSGPVEDFPADTAPRLRRSGEAFNSIVERTALFLTGGDGGCGGGGTRLLRGMKIGS

```

```

00:1|Ac-MEATAAAAAAGPPGLLR-----
01:9606|8270|0#NP_001268222|ZNF281|Homo_sapiens|GFLSGGGGTSSGGSGSGGGSGGGGGSSGRRAEEMPTFPQGMVFNHRLPPVTSFTR
01:9606|8270|0#NP_001268223|ZNF281|Homo_sapiens|GFLSGGGGTSSGGSGSGGGSGGGGGSSGRRAEEMPTFPQ-----
01:9606|8270|0#NP_036614|ZNF281|Homo_sapiens|GFLSGGGGTSSGGSGSGGGSGGGGGSSGRRAEEMPTFPQGMVFNHRLPPVTSFTR
01:9606|8270|NM_001281293|ZNF281|Homo_sapiens|GFLSGGGGTSSGGSGSGGGSGGGGGSSGRRAEEMPTFPQGMVFNHRLPPVTSFTR
01:9606|8270|NM_001281294|ZNF281|Homo_sapiens|GFLSGGGGTSSGGSGSGGGSGGGGGSSGRRAEEMPTFPQ-----
01:9606|8270|NM_012482|ZNF281|Homo_sapiens|GFLSGGGGTSSGGSGSGGGSGGGGGSSGRRAEEMPTFPQGMVFNHRLPPVTSFTR
06:10116|8270|NM_001012030|Zfp281|Rattus_norvegicus|GFLSGGGGPSSGGSGSGSSGSS-----GSGSGRRAEEMPTFPQSMVFNHRLPPVTSFTR
07:10090|8270|NM_001160251|Zfp281|Mus_musculus|GFLSGGGGPSSSGSGSGSSGSS-GSASGSGSGRRAEEMPTFPQSMVFNHRLPPVTSFTR
07:10090|8270|NM_177643|Zfp281|Mus_musculus|GFLSGGGGPSSGGSGSGSSGSS-GSASGSGGRRAEEMPTFPQSMVFNHRLPPVTSFTR

```

```

00:01|Ac-MEATAAAAAAGPPGLLR-----MEATAAAAAAGPPG-----
01:9606|8270|0#NP_001268222|ZNF281|Homo_sapiensPAGSAAPPPQCVLSSSTSAAPAAEPPPPAPDMTFKKEPAASAAAFPSQRTSWGFLQSLV
01:9606|8270|0#NP_001268223|ZNF281|Homo_sapiensPAGSAAPPPQCVLSSSTSAAPAAEPPPPAPDMTFKKEPAASAAAFPSQRTSWGFLQSLV
01:9606|8270|0#NP_036614|ZNF281|Homo_sapiensPAGSAAPPPQCVLSSSTSAAPAAEPPPPAPDMTFKKEPAASAAAFPSQRTSWGFLQSLV
01:9606|8270|NM_001281293|ZNF281|Homo_sapiensPAGSAAPPPQCVLSSSTSAAPAAEPPPPAPDMTFKKEPAASAAAFPSQRTSWGFLQSLV
01:9606|8270|NM_001281294|ZNF281|Homo_sapiensPAGSAAPPPQCVLSSSTSAAPAAEPPPPAPDMTFKKEPAASAAAFPSQRTSWGFLQSLV
01:9606|8270|NM_012482|ZNF281|Homo_sapiensPAGSAAPPPQCVLSSSTSAAPAAEPPPPAPDMTFKKEPAASAAAFPSQRTSWGFLQSLV
06:10116|8270|NM_001012030|Zfp281|Rattus_norvegicusPAGTAAPPPQCVLSSSTSAAPAAEPPPPAPDMTFKKEPAASAAAFPSQRTSWGFLQSLV
07:10090|8270|NM_001160251|Zfp281|Mus_musculusPAGTAAPPPQCVLSSSTSAAPAAEPPPPAPDMTFKKEPAASAAAFPSQRTSWGFLQSLV
07:10090|8270|NM_177643|Zfp281|Mus_musculusPAGTAAPPPQCVLSSSTSAAPAAEPPPPAPDMTFKKEPAASAAAFPSQRTSWGFLQSLV
                                     * * * *

```

| 00:1     | Ac-MEATAAAAAAGPPGLLR |                |        |                   | -----LLR-----                                                 |
|----------|----------------------|----------------|--------|-------------------|---------------------------------------------------------------|
| 01:9606  | 8270                 | 0#NP_001268222 | ZNF281 | Homo_sapiens      | SIKQEKPADPEEQSSHSHHHHHHHYGGFLFAGAERSPGLGGGEGGSHGVIQDLSILHQHVQ |
| 01:9606  | 8270                 | 0#NP_001268223 | ZNF281 | Homo_sapiens      | SIKQEKPADPEEQSSHSHHHHHHHYGGFLFAGAERSPGLGGGEGGSHGVIQDLSILHQHVQ |
| 01:9606  | 8270                 | 0#NP_036614    | ZNF281 | Homo_sapiens      | SIKQEKPADPEEQSSHSHHHHHHHYGGFLFAGAERSPGLGGGEGGSHGVIQDLSILHQHVQ |
| 01:9606  | 8270                 | NM_001281293   | ZNF281 | Homo_sapiens      | SIKQEKPADPEEQSSHSHHHHHHHYGGFLFAGAERSPGLGGGEGGSHGVIQDLSILHQHVQ |
| 01:9606  | 8270                 | NM_001281294   | ZNF281 | Homo_sapiens      | SIKQEKPADPEEQSSHSHHHHHHHYGGFLFAGAERSPGLGGGEGGSHGVIQDLSILHQHVQ |
| 01:9606  | 8270                 | NM_012482      | ZNF281 | Homo_sapiens      | SIKQEKPADPEEQSSHSHHHHHHHYGGFLFAGAERSPGLGGGEGGSHGVIQDLSILHQHVQ |
| 06:10116 | 8270                 | NM_001012030   | Zfp281 | Rattus_norvegicus | SIKQEKPADPEEQSSHSHHHHHHHYGGFLFAGAERSPGLGGGEGGSHGVIQDLSILHQHVQ |
| 07:10090 | 8270                 | NM_001160251   | Zfp281 | Mus_musculus      | SIKQEKPADPEEQSSHSHHHHHHHYGGFLFAGAERSPGLGGGEGGSHGVIQDLSLLHQHAQ |
| 07:10090 | 8270                 | NM_177643      | Zfp281 | Mus_musculus      | SIKQEKPADPEEQSSHSHHHHHHHYGGFLFAGAERSPGLGGGEGGSHGVIQDLSLLHQHAQ |

```

00:1|Ac-MEATAAAAAAGPPGLLR-----
01:9606|8270|0#NP_001268222|ZNF281|Homo_sapiens|QQPAQHHRDVLVSSSSRTDDHHGTEEPKQDNTVKKAKRKPESQGIKAKRKPSASSKPSL
01:9606|8270|0#NP_001268223|ZNF281|Homo_sapiens|QQPAQHHRDVLVSSSSRTDDHHGTEEPKQDNTVKKAKRKPESQGIKAKRKPSASSKPSL
01:9606|8270|0#NP_036614|ZNF281|Homo_sapiens|QQPAQHHR-----
01:9606|8270|NM_001281293|ZNF281|Homo_sapiens|QQPAQHHRDVLVSSSSRTDDHHGTEEPKQDNTVKKAKRKPESQGIKAKRKPSASSKPSL
01:9606|8270|NM_001281294|ZNF281|Homo_sapiens|QQPAQHHRDVLVSSSSRTDDHHGTEEPKQDNTVKKAKRKPESQGIKAKRKPSASSKPSL
01:9606|8270|NM_012482|ZNF281|Homo_sapiens|QQPAQHHRDVLVSSSSRTDDHHGTEEPKQDNTVKKAKRKPESQGIKAKRKPSASSKPSL
06:10116|8270|NM_001012030|Zfp281|Rattus_norvegicus|QQPAQHHRDVLVSSSGSRTDDHGNEEPKQDNTVKKAKRKPESQGIKAKRKPSASSKP-L
07:10090|8270|NM_001160251|Zfp281|Mus_musculus|QQPAQHHRDVLVSS-SGSRTDEHGNQEPKQDANVKKAKRKPESQGIKAKRKPSASSKP-L
07:10090|8270|NM_177643|Zfp281|Mus_musculus|QQPAQHHRDVLVSS-SGSRTDEHGNQEPKQDANVKKAKRKPESQGIKAKRKPSASSKP-L

```

```

00:1|Ac-MEATAAAAAAGPPGLLR-----
01:9606|8270|0#NP_001268222|ZNF281|Homo_sapiens|VGDGEGAILSPSQKPHICDHCSAAFRSSSYHLRRHVLHTGERPFQCSQCSMGFIQKYLLQ
01:9606|8270|0#NP_001268223|ZNF281|Homo_sapiens|VGDGEGAILSPSQKPHICDHCSAAFRSSSYHLRRHVLHTGERPFQCSQCSMGFIQKYLLQ
01:9606|8270|0#NP_036614|ZNF281|Homo_sapiens|-----
01:9606|8270|NM_001281293|ZNF281|Homo_sapiens|VGDGEGAILSPSQKPHICDHCSAAFRSSSYHLRRHVLHTGERPFQCSQCSMGFIQKYLLQ
01:9606|8270|NM_001281294|ZNF281|Homo_sapiens|VGDGEGAILSPSQKPHICDHCSAAFRSSSYHLRRHVLHTGERPFQCSQCSMGFIQKYLLQ
01:9606|8270|NM_012482|ZNF281|Homo_sapiens|VGDGEGAILSPSQKPHICDHCSAAFRSSSYHLRRHVLHTGERPFQCSQCSMGFIQKYLLQ
06:10116|8270|NM_001012030|Zfp281|Rattus_norvegicus|VGE GEGAVLSPSQKPHICDHCSAAFRSSSYHLRRHVLHTGERPFQCSQCSMGFIQKYLLQ
07:10090|8270|NM_001160251|Zfp281|Mus_musculus|VGE GEGAVLSPSQKPHICDHCSAAFRSSSYHLRRHVLHTGERPFQCSQCSMGFIQKYLLQ
07:10090|8270|NM_177643|Zfp281|Mus_musculus|VGE GEGAVLSPSQKPHICDHCSAAFRSSSYHLRRHVLHTGERPFQCSQCSMGFIQKYLLQ

```

```

00:1|Ac-MEATAAAAAAGPPGLLR-----
01:9606|8270|0#NP_001268222|ZNF281|Homo_sapiensRHEKHSREKPFGCDQCSMKFIQKYHMERHKRTHSGEKPYPKCDTCQQYFSRTDRLLKHRR
01:9606|8270|0#NP_001268223|ZNF281|Homo_sapiensRHEKHSREKPFGCDQCSMKFIQKYHMERHKRTHSGEKPYPKCDTCQQYFSRTDRLLKHRR
-----
01:9606|8270|0#NP_036614|ZNF281|Homo_sapiens-----
01:9606|8270|NM_001281293|ZNF281|Homo_sapiensRHEKHSREKPFGCDQCSMKFIQKYHMERHKRTHSGEKPYPKCDTCQQYFSRTDRLLKHRR
01:9606|8270|NM_001281294|ZNF281|Homo_sapiensRHEKHSREKPFGCDQCSMKFIQKYHMERHKRTHSGEKPYPKCDTCQQYFSRTDRLLKHRR
01:9606|8270|NM_012482|ZNF281|Homo_sapiensRHEKHSREKPFGCDQCSMKFIQKYHMERHKRTHSGEKPYPKCDTCQQYFSRTDRLLKHRR
06:10116|8270|NM_001012030|Zfp281|Rattus_norvegicusRHEKHSREKPFGCDQCSMKFIQKYHMERHKRTHSGEKPYPKCDTCQQYFSRTDRLLKHRR
07:10090|8270|NM_001160251|Zfp281|Mus_musculusRHEKHSREKPFGCDQCSMKFIQKYHMERHKRTHSGEKPYPKCDTCQQYFSRTDRLLKHRR
07:10090|8270|NM_177643|Zfp281|Mus_musculusRHEKHSREKPFGCDQCSMKFIQKYHMERHKRTHSGEKPYPKCDTCQQYFSRTDRLLKHRR

```

TCGEVIVKGATSAEPGSSNHTNMGNLAVLSQGNTSSRRRKTKSKSIAIENKEQKTGKTNE  
TCGEVIVKGATSAEPGSSNHTNMGNLAVLSQGNTSSRRRKTKSKSIAIENKEQKTGKTNE  
TCGEVIVKGATSAEPGSSNHTNMGNLAVLSQGNTSSRRRKTKSKSIAIENKEQKTGKTNE  
TCGEVIVKGATSAEPGSSNHTNMGNLAVLSQGNTSSRRRKTKSKSIAIENKEQKTGKTNE  
TCGEVIVKGATSAEPGSSNHTNMGNLAVLSQGNTSSRRRKTKSKSIAIENKEQKTGKTNE  
TCGEAIAKGAASAEPPGSSNNHNMGNLAVLSQGNTSSRRRKSKSKSIAVENKEHKTKGTNE  
TCGEAIAKGAASAEPPGSSNNHNSMGNLAVLSQGNTSSRRRKSKSKSIAIENKEHKTKGTNE  
TCGEAIAKGAASAEPPGSSNNHNSMGNLAVLSQGNTSSRRRKSKSKSIAIENKEHKTKGTNE

```

-----
S Q I S N N I M Q S Y S V E M P T V S S S G G I I G T G I D E L Q K R V P K L I F K K G S R K N T D K N Y L N F V S E
S Q I S N N I M Q S Y S V E M P T V S S S G G I I G T G I D E L Q K R V P K L I F K K G S R K N T D K N Y L N F V S E
-----
S Q I S N N I M Q S Y S V E M P T V S S S G G I I G T G I D E L Q K R V P K L I F K K G S R K N T D K N Y L N F V S E
S Q I S N N I M Q S Y S V E M P T V S S S G G I I G T G I D E L Q K R V P K L I F K K G S R K N T D K N Y L N F V S E
S Q I S N N I M Q S Y S V E M P T V S S S G G I I G T G I D E L Q K R V P K L I F K K G S R K N T D K N Y L N F V S E
S Q M S N N I M Q S Y S V E M P T V S T S G G I I G T G I D E L Q K R V P K L I F K K G S R K N T D K S Y L N F V S E
S Q M S N N I M Q S Y S V E M P T V S T S G S I I G T G I D E L Q K R V P K L I F K K G S R K N A D K S Y L N F V S E
S Q M S N N I M Q S Y S V E M P T V S T S G S I I G T G I D E L Q K R V P K L I F K K G S R K N A D K S Y L N F V S E
-----

```

```

LPDIVGQKSLSGKPSGSLGIVSNNSVETIGLLQSTSGKQGQISSNYDDAMQFSKKRRYLE
LPDIVGQKSLSGKPSGSLGIVSNNSVETIGLLQSTSGKQGQISSNYDDAMQFSKKRRYLE
LPDIVGQKSLSGKPSGSLGIVSNNSVETIGLLQSTSGKQGQISSNYDDAMQFSKKRRYLE
LPDIVGQKSLSGKPSGSLGIVSNNSVETIGLLQSTSGKQGQISSNYDDAMQFSKKRRYLE
LPDIVGQKSLSGKPSGSLGIVSNNSVETIGLLQSTSGKQGQISSNYDDAMQFSKKRRYLE
LPDVAGQKSLSGKPSGSLGIVSNNSVETISLLQSTSGKQGPISNYDDAMQFSKKRRYLE
LPDVVGQKSLSGKPGGSLGIVSNNSVETISLLQSTSGKQGPISNYDDAMQFSKKRRYLE
LPDVVGQKSLSGKPGGSLGIVSNNSVETISLLQSTSGKQGPISNYDDAMQFSKKRRYLE

```

[illegible]

```
-----  
VLQSILDDQYSNKSSESQKEDPFNIAEPRVDLHTSGEHSELVQEENLSPGTQTPTSNDKASMI  
VLQSILDDQYSNKSSESQKEDPFNIAEPRVDLHTSGEHSELVQEENLSPGTQTPTSNDKASMI  
  
VLQSILDDQYSNKSSESQKEDPFNIAEPRVDLHTSGEHSELVQEENLSPGTQTPTSNDKASMI  
VLQSILDDQYSNKSSESQKEDPFNIAEPRVDLHTSGEHSELVQEENLSPGTQTPTSNDKASMI  
VLQSILDDQYSNKSSESQKEDPFNIAEPRVDLHTSGEHSELVQEENLSPGTQTPTSNDKASMI  
VLQSILDDQYSSKSEPQKEDPFNLTEPRVDLHTSGEHSELVQEEHLSPGTQTPTSNDKASIVL  
VLQSILDDQYSGKSETQKEDPFNLTEPRVDLHTSGEHSELVQEENLSPGTQTPTSNDKTSML  
VLQSILDDQYSGKSETQKEDPFNLTEPRVDLHTSGEHSELVQEENLSPGTQTPTSNDKTSML
```

Q E Y S K Y L Q Q A F E K S T N A S F T L G H G F Q F V S L S S P L N H N T L F P E K Q I Y T T S P L E C G F Q G S V T  
Q E Y S K Y L Q Q A F E K S T N A S F T L G H G F Q F V S L S S P L N H N T L F P E K Q I Y T T S P L E C G F Q G S V T  
Q E Y S K Y L Q Q A F E K S T N A S F T L G H G F Q F V S L S S P L N H N T L F P E K Q I Y T T S P L E C G F Q G S V T  
Q E Y S K Y L Q Q A F E K S T N A S F T L G H G F Q F V S L S S P L N H N T L F P E K Q I Y T T S P L E C G F Q G S V T  
Q E Y S K Y L Q Q A F E K S T N A S F T L G H G F Q F V S L S S P L N H N T L F P E K Q I Y T T S P L E C G F Q G S V T  
Q E Y S K Y L Q Q A F E K S T N A G F T L G H G F Q F V S L S S P L N H N T L F P E K Q I Y T T S P L E C G F Q G S V T  
Q E Y S K Y L Q Q A F E K S T N A G F T L G H G F Q F V S L S S P L N H N T L F P E K Q I Y T T S P L E C G F Q G S V T  
Q E Y S K Y L Q Q A F E K S T N A G F T L G H G F Q F V S L S S P L N H N T L F P E K Q I Y T T S P L E C G F Q G S V T

SVLPSLLPKPPFGMLFGSQPGLYLSALDATHQQLTPSQELDDLIDSQKNLETSSAFQSSS  
SVLPSSLPKPPFGMLFGSQPGLYLSALDATHQQLTPSQELDDLIDSQKNLETSSAFQSSS

SVLPSLLPKPPFGMLFGSQPGLYLSALDATHQQLTPSQELDDLIDSQKNLETSSAFQSSS  
SVLPSSLPKPPFGMLFGSQPGLYLSALDATHQQLTPSQELDDLIDSQKNLETSSAFQSSS  
SVLPSSLPKPPFGMLFGSQPGLYLSALDATHQQLTPSQELDDLIDSQKNLETSSAFQSSS  
SVLPSSLPKPPFGMLFGSQPGLYLSALDATHQQLTPSQELDDLIDSQKNLETSSAFQSSS  
SVLPSSLPKPPFGMLFGSQPGLYLSALDATHQQLTPSQELDDLIDSQKNLETSSAFQSSS

-----

|          |  |      |  |                |  |        |  |                   |                                                                |
|----------|--|------|--|----------------|--|--------|--|-------------------|----------------------------------------------------------------|
| 01:9606  |  | 8270 |  | 0#NP_001268222 |  | ZNF281 |  | Homo_sapiens      | QKLT SQKE-QKNLESSTGFQIP SQELASQIDPQKDIEPRTTYQIENFAQAFGSQFKSGSR |
| 01:9606  |  | 8270 |  | 0#NP_001268223 |  | ZNF281 |  | Homo_sapiens      | QKLT SQKE-QKNLESSTGFQIP SQELASQIDPQKDIEPRTTYQIENFAQAFGSQFKSGSR |
| 01:9606  |  | 8270 |  | 0#NP_036614    |  | ZNF281 |  | Homo_sapiens      | -----                                                          |
| 01:9606  |  | 8270 |  | NM_001281293   |  | ZNF281 |  | Homo_sapiens      | QKLT SQKE-QKNLESSTGFQIP SQELASQIDPQKDIEPRTTYQIENFAQAFGSQFKSGSR |
| 01:9606  |  | 8270 |  | NM_001281294   |  | ZNF281 |  | Homo_sapiens      | QKLT SQKE-QKNLESSTGFQIP SQELASQIDPQKDIEPRTTYQIENFAQAFGSQFKSGSR |
| 01:9606  |  | 8270 |  | NM_012482      |  | ZNF281 |  | Homo_sapiens      | QKLT SQKE-QKNLESSTGFQIP SQELASQIDPQKDIEPRTTYQIENFAQAFGSQFKSGSR |
| 06:10116 |  | 8270 |  | NM_001012030   |  | Zfp281 |  | Rattus_norvegicus | QKLT SQKEQQKNLESSTSFQIP SQELASQIDPQKDIEPRTTYQIENFAQAFGSQFKSGSR |
| 07:10090 |  | 8270 |  | NM_001160251   |  | Zfp281 |  | Mus_musculus      | QKLT SQKEQQKNLESSTSFQIP SQELASQIDPQKDIEPRTTYQIENFAQAFGSQFKSGSR |
| 07:10090 |  | 8270 |  | NM_177643      |  | Zfp281 |  | Mus_musculus      | QKLT SQKEQQKNLESSTSFQIP SQELASQIDPQKDIEPRTTYQIENFAQAFGSQFKSGSR |

|          |  |                      |  |                |  |        |  |                   |                                                     |
|----------|--|----------------------|--|----------------|--|--------|--|-------------------|-----------------------------------------------------|
| 00:1     |  | Ac-MEATAAAAAAGPPGLLR |  |                |  |        |  |                   | -----                                               |
| 01:9606  |  | 8270                 |  | 0#NP_001268222 |  | ZNF281 |  | Homo_sapiens      | VPMTFITNSNGEVDHRVRTSVSDFSGYTNMMSDVSEPCSTRVKTPTSQSYR |
| 01:9606  |  | 8270                 |  | 0#NP_001268223 |  | ZNF281 |  | Homo_sapiens      | VPMTFITNSNGEVDHRVRTSVSDFSGYTNMMSDVSEPCSTRVKTPTSQSYR |
| 01:9606  |  | 8270                 |  | 0#NP_036614    |  | ZNF281 |  | Homo_sapiens      | -----                                               |
| 01:9606  |  | 8270                 |  | NM_001281293   |  | ZNF281 |  | Homo_sapiens      | VPMTFITNSNGEVDHRVRTSVSDFSGYTNMMSDVSEPCSTRVKTPTSQSYR |
| 01:9606  |  | 8270                 |  | NM_001281294   |  | ZNF281 |  | Homo_sapiens      | VPMTFITNSNGEVDHRVRTSVSDFSGYTNMMSDVSEPCSTRVKTPTSQSYR |
| 01:9606  |  | 8270                 |  | NM_012482      |  | ZNF281 |  | Homo_sapiens      | VPMTFITNSNGEVDHRVRTSVSDFSGYTNMMSDVSEPCSTRVKTPTSQSYR |
| 06:10116 |  | 8270                 |  | NM_001012030   |  | Zfp281 |  | Rattus_norvegicus | VPMTFITNSNGEVDHRVRTSVSDFSGYTNMMSDVSEPCSTRVKTPTSQSYR |
| 07:10090 |  | 8270                 |  | NM_001160251   |  | Zfp281 |  | Mus_musculus      | VPMTFITNSNGEVDHRVRTSVSDFSGYTNMMSDVSEPCSTRVKTPTSQSYR |
| 07:10090 |  | 8270                 |  | NM_177643      |  | Zfp281 |  | Mus_musculus      | VPMTFITNSNGEVDHRVRTSVSDFSGYTNMMSDVSEPCSTRVKTPTSQSYR |

*C11orf96*

Ac-MDPPPGEPAAASR

```
001: |Ac-MDPPPGEPPAAASR
01:9606|83963|NM_001145033|C11orf96|Homo_sapiens
04:9913|83963|NM_001145035|C15H11orf96|Bos_taurus
06:10116|83963|NM_001110055|RGD1564664|Rattus_norvegicus
07:10090|83963|NM_001145034|Gm13889|Mus_musculus
08:9031|83963|NM_001145042|C5H11ORF96|Gallus_gallus
```

```
001: |Ac-MDPPPGEPPAAASR
01:9606|83963|NM_001145033|C11orf96|Homo_sapiens
04:9913|83963|NM_001145035|C15H11orf96|Bos_taurus
06:10116|83963|NM_001110055|RGD1564664|Rattus_norvegicus
07:10090|83963|NM_001145034|Gm13889|Mus_musculus
08:9031|83963|NM_001145042|C5H11ORF96|Gallus_gallus
```

```
001:|Ac-MDPPPGEPPAAASR
01:9606|83963|NM_001145033|C11orf96|Homo_sapiens
04:9913|83963|NM_001145035|C15H11orf96|Bos_taurus
06:10116|83963|NM_001110055|RGD1564664|Rattus_norvegicus
07:10090|83963|NM_001145034|Glm3889|Mus_musculus
08:9031|83963|NM_001145042|C5H11ORF96|Gallus_gallus
```

```
00:01|Ac-MDPPPGEPPEAAASR
01:9606|83963|NM_001145033|C11orf96|Homo_sapiens
04:9913|83963|NM_001145035|C15H1orf96|Bos_taurus
06:10116|83963|NM_001110055|RGD1564664|Rattus_norvegicus
07:10090|83963|NM_001145034|Gm13889|Mus_musculus
08:9031|83963|NM_001145042|C5H11ORF96|Gallus_gallus
```

```
00:1|Ac-MDPPPGEPAAAAAR
01:9606|83963|NM_001145033|C11orf96|Homo_sapiens
04:9913|83963|NM_001145035|C15H1orf96|Bos_taurus
06:10116|83963|NM_001110055|RGD1564664|Rattus_norvegicus
07:10090|83963|NM_001145034|Gm13889|Mus_musculus
08:9031|83963|NM_001145042|C5H11ORF96|Gallus_gallus
```

```
001: |Ac-MDPPPGEPPAAASR
01:9606|83963|NM_001145033|C11orf96|Homo_sapiens
04:9913|83963|NM_001145035|C15H11orf96|Bos_taurus
06:10116|83963|NM_001110055|RGD1564664|Rattus_norvegicus
07:10090|83963|NM_001145034|Gm13889|Mus_musculus
08:9031|83963|NM_001145042|C5H11ORF96|Gallus_gallus
```

```
00:1|Ac-MDPPPGEPAAAAAR
01:9606|83963|NM_001145033|C11orf96|Homo_sapiens
04:9913|83963|NM_001145035|C15H11orf96|Bos_taurus
06:10116|83963|NM_001110055|RGD1564664|Rattus_norvegicus
07:10090|83963|NM_001145034|Gm13889|Mus_musculus
08:9031|83963|NM_001145042|C5H11ORF96|Gallus_gallus
```

```
00:1|Ac-MDPPPGEPPEAAASR
01:9606|83963|NM_001145033|C11orf96|Homo_sapiens
04:9913|83963|NM_001145035|C15H11orf96|Bos_taurus
06:10116|83963|NM_001110055|RGD1564664|Rattus_norvegicus
07:10090|83963|NM_001145034|Gm13889|Mus_musculus
08:9031|83963|NM_001145042|C5H11ORF96|Gallus_gallus
```

GRSAAATASGGLIFIFALRWLKAFI

*RGPD1*

CLUSTAL O(1.2.1) multiple sequence alignment

|                                       |       |                |        |              |                                                               |
|---------------------------------------|-------|----------------|--------|--------------|---------------------------------------------------------------|
| 01:9606                               | 87808 | 0#NP_001019628 | RGPD1  | Homo_sapiens | -----M-----                                                   |
| 01:9606                               | 87808 | 0#NP_001032955 | RGPD6  | Homo_sapiens | -----                                                         |
| 01:9606                               | 87808 | 0#NP_001071638 | RGPD2  | Homo_sapiens | -----                                                         |
| 01:9606                               | 87808 | 0#NP_001116835 | RGPD6  | Homo_sapiens | -----                                                         |
| 01:9606                               | 87808 | 0#NP_001137485 | RGPD3  | Homo_sapiens | -----                                                         |
| 01:9606                               | 87808 | 0#NP_001157935 | RGPD8  | Homo_sapiens | -----                                                         |
| 01:9606                               | 87808 | 0#NP_005045    | RGPD5  | Homo_sapiens | -----                                                         |
| 01:9606                               | 87808 | 0#NP_115636    | RGPD5  | Homo_sapiens | -----                                                         |
| 01:9606                               | 87808 | 0#NP_872394    | RGPD4  | Homo_sapiens | -----                                                         |
| 01:9606                               | 87808 | NM_001024457   | RGPD1  | Homo_sapiens | -----FVTCLM-----                                              |
| 01:9606                               | 87808 | NM_001037866   | RGPD6  | Homo_sapiens | GRTQVRHSGPPWAAPHARHSGPPPATPLLQWLAGTFLLEVATAAGLSGARTRLGSQVGGGA |
| 01:9606                               | 87808 | NM_001078170   | RGPD2  | Homo_sapiens | -----GFTRLGSQVGGGA                                            |
| 01:9606                               | 87808 | NM_001123363   | RGPD6  | Homo_sapiens | GRTQVRHSGPPWAAPHARHSGPPPATPLLQWLAGTFLLEVATAAGLSGARTRLGSQVGGGA |
| 01:9606                               | 87808 | NM_001144013   | RGPD3  | Homo_sapiens | -----TAAGLSAGLTHLGSQVGGGA                                     |
| 01:9606                               | 87808 | NM_001164463   | RGPD8  | Homo_sapiens | GRTQVRHSGPPWAAPHARHSGPPPATPLLQWLAGTFLLEVATAAGLSGARTRLGSQVGGGA |
| 01:9606                               | 87808 | NM_005054      | RGPD5  | Homo_sapiens | -----FLLEVATAAGLSGARTRLGSQVGGGA                               |
| 01:9606                               | 87808 | NM_032260      | RGPD5  | Homo_sapiens | GRTQVRHSGPPWAAPHARHSGPPPATPLLQWLAGTFLLEVATAAGLSGARTRLGSQVGGGA |
| 01:9606                               | 87808 | NM_182588      | RGPD4  | Homo_sapiens | -----GAFLLELATAAGLSAGFTRLGSQVGGGA                             |
| 04:9913                               | 87808 | NM_174592      | RANBP2 | Bos_taurus   | -----                                                         |
| 07:10090                              | 87808 | NM_011240      | Ranbp2 | Mus_musculus | -----ALCPSVRDG-----AASPVFGAHLLPEAVAVGPRAGLPLLGSILVRGA         |
|                                       |       |                |        |              |                                                               |
| 01:9606                               | 87808 | 0#NP_001019628 | RGPD1  | Homo_sapiens | --N-----VMGFNTDRLAWTRN-KLRGFYFAKLYEAKKEYDLAKKYVCTYLSVQERDP    |
| 01:9606                               | 87808 | 0#NP_001032955 | RGPD6  | Homo_sapiens | MRRSKADVERYVASVGLTTPSPRQKSMKGFYFAKLYEAKKEYDLAKKYICTYINVQERDP  |
| 01:9606                               | 87808 | 0#NP_001071638 | RGPD2  | Homo_sapiens | MRRSKAYGERYLASVQGSAPSPGK-KLRGFYFAKLYEAKKEYDLAKKYVCTYLSVQERDP  |
| 01:9606                               | 87808 | 0#NP_001116835 | RGPD6  | Homo_sapiens | MRRSKADVERYVASVGLTTPSPRQKSMKGFYFAKLYEAKKEYDLAKKYICTYINVQERDP  |
| 01:9606                               | 87808 | 0#NP_001137485 | RGPD3  | Homo_sapiens | MRRSKADVERYVASVQGSAPSPRKKSTRGFYFAKLYEAKKEYDLAKKYICTYINVREMDP  |
| 01:9606                               | 87808 | 0#NP_001157935 | RGPD8  | Homo_sapiens | MRRSKADVERYVASVGLTTPSPRQKSMKGFYFAKLYEAKKEYDLAKKYICTYINVQERDP  |
| 01:9606                               | 87808 | 0#NP_005045    | RGPD5  | Homo_sapiens | MRRSKADVERYVASVGLTTPSPRQKSMKGFYFAKLYEAKKEYDLAKKYICTYINVQERDP  |
| 01:9606                               | 87808 | 0#NP_115636    | RGPD5  | Homo_sapiens | MRRSKADVERYVASVGLTTPSPRQKSMKGFYFAKLYEAKKEYDLAKKYICTYINVQERDP  |
| 01:9606                               | 87808 | 0#NP_872394    | RGPD4  | Homo_sapiens | MRRSKADVERYVASVGLTTPSPRQKSMKGFYFAKLYEAKKEYDLAKKYICTYINVREMDP  |
| 01:9606                               | 87808 | NM_001024457   | RGPD1  | Homo_sapiens | MSCSKAYGERYVASVQGSAPSPRKKSTRGFYFAKLYEAKKEYDLAKKYICTYINVREMDP  |
| 01:9606                               | 87808 | NM_001037866   | RGPD6  | Homo_sapiens | --N-----VMGFNTDRLAWTRN-KLRGFYFAKLYEAKKEYDLAKKYVCTYLSVQERDP    |
| 01:9606                               | 87808 | NM_001078170   | RGPD2  | Homo_sapiens | MRRSKADVERYVASVGLTTPSPRQKSMKGFYFAKLYEAKKEYDLAKKYICTYINVQERDP  |
| 01:9606                               | 87808 | NM_001123363   | RGPD6  | Homo_sapiens | MRRSKAYGERYLASVQGSAPSPGK-KLRGFYFAKLYEAKKEYDLAKKYVCTYLSVQERDP  |
| 01:9606                               | 87808 | NM_001144013   | RGPD3  | Homo_sapiens | MRRSKADVERYVASVGLTTPSPRQKSMKGFYFAKLYEAKKEYDLAKKYICTYINVQERDP  |
| 01:9606                               | 87808 | NM_001164463   | RGPD8  | Homo_sapiens | MRRSKADVERYVASVGLTTPSPRQKSMKGFYFAKLYEAKKEYDLAKKYICTYINVQERDP  |
| 01:9606                               | 87808 | NM_005054      | RGPD5  | Homo_sapiens | MRRSKADVERYVASVGLTTPSPRQKSMKGFYFAKLYEAKKEYDLAKKYICTYINVQERDP  |
| 01:9606                               | 87808 | NM_032260      | RGPD5  | Homo_sapiens | MRRSKADVERYVASVGLTTPSPRQKSMKGFYFAKLYEAKKEYDLAKKYICTYINVQERDP  |
| 01:9606                               | 87808 | NM_182588      | RGPD4  | Homo_sapiens | MRRSKADVERYVASVQGSAPSPRKKSTRGFYFAKLYEAKKEYDLAKKYICTYINVREMDP  |
| 04:9913                               | 87808 | NM_174592      | RANBP2 | Bos_taurus   | MRRSKADVDRHIASVQGSAPSPREKSMKGFYFAKLYEAKKEYDLAKKYISTYINVQERDP  |
| 07:10090                              | 87808 | NM_011240      | Ranbp2 | Mus_musculus | MRRSKADVERYIASVQGSAPSPREKSMKGFYFAKLYEAKKEYDLAKKYISTYINVQERDP  |
| : . : . :*****:***:*** **             |       |                |        |              |                                                               |
|                                       |       |                |        |              |                                                               |
| 01:9606                               | 87808 | 0#NP_001019628 | RGPD1  | Homo_sapiens | RAHRFLGLLYELEENTEKAVECYRRSLELNPPQKDLVLKIAELLCKNDVTDGRAKYWVER  |
| 01:9606                               | 87808 | 0#NP_001032955 | RGPD6  | Homo_sapiens | KAHRFLGLLYELEENTEKAVECYRRSVELNPTQKDLVLKIAELLCKNDVTDGRAKYWVER  |
| 01:9606                               | 87808 | 0#NP_001071638 | RGPD2  | Homo_sapiens | RAHRFLGLLYELEENTEKAVECYRRSLELNPPQKDLVLKIAELLCKNDVTDGRAKYWVER  |
| 01:9606                               | 87808 | 0#NP_001116835 | RGPD6  | Homo_sapiens | KAHRFLGLLYELEENTEKAVECYRRSVELNPTQKDLVLKIAELLCKNDVTDGRAKYWVER  |
| 01:9606                               | 87808 | 0#NP_001137485 | RGPD3  | Homo_sapiens | RAHRFLGLLYELEENTEKAVECYRRSVELNPTQKDLVLKIAELLCKNDVTDGRABYWVER  |
| 01:9606                               | 87808 | 0#NP_001157935 | RGPD8  | Homo_sapiens | KAHRFLGLLYELEENTEKAVECYRRSVELNPTQKDLVLKIAELLCKNDVTDGRAKYWVER  |
| 01:9606                               | 87808 | 0#NP_005045    | RGPD5  | Homo_sapiens | KAHRFLGLLYELEENTEKAVECYRRSVELNPTQKDLVLKIAELLCKNDVTDGRAKYWVER  |
| 01:9606                               | 87808 | 0#NP_115636    | RGPD5  | Homo_sapiens | KAHRFLGLLYELEENTEKAVECYRRSVELNPTQKDLVLKIAELLCKNDVTDGRAKYWVER  |
| 01:9606                               | 87808 | 0#NP_872394    | RGPD4  | Homo_sapiens | RAHRFLGLLYELEENTEKAVECYRRSVELNPTQKDLVLKIAELLCKNDVTDGRAKYWVER  |
| 01:9606                               | 87808 | NM_001024457   | RGPD1  | Homo_sapiens | RAHRFLGLLYELEENTEKAVECYRRSLELNPPQKDLVLKIAELLCKNDVTDGRAKYWVER  |
| 01:9606                               | 87808 | NM_001037866   | RGPD6  | Homo_sapiens | KAHRFLGLLYELEENTEKAVECYRRSVELNPTQKDLVLKIAELLCKNDVTDGRAKYWVER  |
| 01:9606                               | 87808 | NM_001078170   | RGPD2  | Homo_sapiens | RAHRFLGLLYELEENTEKAVECYRRSLELNPPQKDLVLKIAELLCKNDVTDGRAKYWVER  |
| 01:9606                               | 87808 | NM_001123363   | RGPD6  | Homo_sapiens | KAHRFLGLLYELEENTEKAVECYRRSVELNPTQKDLVLKIAELLCKNDVTDGRAKYWVER  |
| 01:9606                               | 87808 | NM_001144013   | RGPD3  | Homo_sapiens | RAHRFLGLLYELEENTEKAVECYRRSVELNPTQKDLVLKIAELLCKNDVTDGRABYWVER  |
| 01:9606                               | 87808 | NM_001164463   | RGPD8  | Homo_sapiens | KAHRFLGLLYELEENTEKAVECYRRSVELNPTQKDLVLKIAELLCKNDVTDGRAKYWVER  |
| 01:9606                               | 87808 | NM_005054      | RGPD5  | Homo_sapiens | KAHRFLGLLYELEENTEKAVECYRRSVELNPTQKDLVLKIAELLCKNDVTDGRAKYWVER  |
| 01:9606                               | 87808 | NM_032260      | RGPD5  | Homo_sapiens | KAHRFLGLLYELEENTEKAVECYRRSVELNPTQKDLVLKIAELLCKNDVTDGRAKYWVER  |
| 01:9606                               | 87808 | NM_182588      | RGPD4  | Homo_sapiens | RAHRFLGLLYELEENTEKAVECYRRSVELNPTQKDLVLKIAELLCKNDVTDGRAKYWVER  |
| 04:9913                               | 87808 | NM_174592      | RANBP2 | Bos_taurus   | KAHRFLGLLYEVEENIEKAVECYRRSVELNPTQKDLVLKIAELLCKNDVTDGRAKYWVER  |
| 07:10090                              | 87808 | NM_011240      | Ranbp2 | Mus_musculus | KAHRFLGLLYEVEENIDKAVECYRRSVELNPTQKDLVLKIAELLCKNDVTDGRAKYWVER  |
| :*****:***:*****:***:**** *****:***** |       |                |        |              |                                                               |
|                                       |       |                |        |              |                                                               |
| 01:9606                               | 87808 | 0#NP_001019628 | RGPD1  | Homo_sapiens | AAKLFPGSPAIIYKIKEHLLDCEGEDGWNKLFDWIQSELYVRPDDVHMNIRLVELYRSNKR |
| 01:9606                               | 87808 | 0#NP_001032955 | RGPD6  | Homo_sapiens | AAKLFPGSPAIIYKIKEQLLDCEGEDGWNKLFDLIQSELYVRPDDVHMNIRLVELYRSTKR |
| 01:9606                               | 87808 | 0#NP_001071638 | RGPD2  | Homo_sapiens | AAKLFPGSPAIIYKIKEHLLDCEGEDGWNKLFDWIQSELYVRPDDVHMNIRLVELYRSNKR |
| 01:9606                               | 87808 | 0#NP_001116835 | RGPD6  | Homo_sapiens | AAKLFPGSPAIIYKIKEQLLDCEGEDGWNKLFDLIQSELYVRPDDVHMNIRLVELYRSTKR |
| 01:9606                               | 87808 | 0#NP_001137485 | RGPD3  | Homo_sapiens | AAKLFPGSPAIIYKIKEQLLDCEGEDGWNKLFDLIQSELYVRPDDVHMNIRLVELYRSTKR |
| 01:9606                               | 87808 | 0#NP_001157935 | RGPD8  | Homo_sapiens | AAKLFPGSPAIIYKIKEQLLDCEGEDGWNKLFDLIQSELYVRPDDVHMNIRLVELYRSTKR |
| 01:9606                               | 87808 | 0#NP_005045    | RGPD5  | Homo_sapiens | AAKLFPGSPAIIYKIKEQLLDCEGEDGWNKLFDLIQSELYVRPDDVHMNIRLVELYRSTKR |
| 01:9606                               | 87808 | 0#NP_115636    | RGPD5  | Homo_sapiens | AAKLFPGSPAIIYKIKEQLLDCEGEDGWNKLFDLIQSELYVRPDDVHMNIRLVELYRSTKR |
| 01:9606                               | 87808 | 0#NP_872394    | RGPD4  | Homo_sapiens | AAKLFPGSPAIIYKIKEQLLDCEGEDGWNKLFDLIQSELYVRPDDVHMNIRLVELYRSTKR |
| 01:9606                               | 87808 | NM_001024457   | RGPD1  | Homo_sapiens | AAKLFPGSPAIIYKIKEHLLDCEGEDGWNKLFDWIQSELYVRPDDVHMNIRLVELYRSNKR |
| 01:9606                               | 87808 | NM_001037866   | RGPD6  | Homo_sapiens | AAKLFPGSPAIIYKIKEQLLDCEGEDGWNKLFDLIQSELYVRPDDVHMNIRLVELYRSTKR |
| 01:9606                               | 87808 | NM_001078170   | RGPD2  | Homo_sapiens | AAKLFPGSPAIIYKIKEHLLDCEGEDGWNKLFDWIQSELYVRPDDVHMNIRLVELYRSNKR |
| 01:9606                               | 87808 | NM_001123363   | RGPD6  | Homo_sapiens | AAKLFPGSPAIIYKIKEQLLDCEGEDGWNKLFDLIQSELYVRPDDVHMNIRLVELYRSTKR |
| 01:9606                               | 87808 | NM_001144013   | RGPD3  | Homo_sapiens | AAKLFPGSPAIIYKIKEQLLDCEGEDGWNKLFDLIQSELYVRPDDVHMNIRLVELYRSTKR |
| 01:9606                               | 87808 | NM_001164463   | RGPD8  | Homo_sapiens | AAKLFPGSPAIIYKIKEQLLDCEGEDGWNKLFDLIQSELYVRPDDVHMNIRLVELYRSTKR |
| 01:9606                               | 87808 | NM_005054      | RGPD5  | Homo_sapiens | AAKLFPGSPAIIYKIKEQLLDCEGEDGWNKLFDLIQSELYVRPDDVHMNIRLVELYRSTKR |
| 01:9606                               | 87808 | NM_032260      | RGPD5  | Homo_sapiens | AAKLFPGSPAIIYKIKEQLLDCEGEDGWNKLFDLIQSELYVRPDDVHMNIRLVELYRSTKR |

AAKLFPGSPAIIYKLKEQLLDCEGEDGWNKFLDLIQSELYVRPDDVHVNIRIVELYRSTKP  
AAKLFPGSPAIIYKLKEQLLDCCKGEDGWNKFLDLIQSELYARPDDVHVNIRIVELYRSNSR  
AAKLFPGSPAIIYKLKEQLLDCKGEDGWNKFLDLIQSELYARPDDIHVNIRIVELYRSNKR  
\*\*\*\*\*  
\*\*\*\*\*

[illegible]

```

NLMMLTLSTRDVQESRELLESFDSALQSAKSSLGGNDELSATFLEMKGHFYMHAGSLLLK
NLMMLTLSTRDVQENRELLESFDSALQSAKSSLGGNDELSATFLEMKGHFYMHAGSLLLK
NLMMLTLSTRDVQESRELLESFDSALQSAKSSLGGNDELSATFLEMKGHFYMHAGSLLLK
NLMMLTLSTRDVQENRELLESFDSALQSAKSSLGGNDELSATFLEMKGHFYMHAGSLLLK
NLMMLTLSTRDVQESRELLESFDSALQSAKSSLGGNDELSATFLEMKGHFYMHAGSLLLK
NLMMLTLSTRDVQENRELLESFDSALQSAKSSLGGNDELSATFLEMKGHFYMHAGSLLLK
NLMMLTLSTRDVQESRELLESFDSALQSAKSSLGGNDELSATFLEMKGHFYMHAGSLLLK
NLMMLTLSTRDVQENRELLESFDSALQSAKSSLGGNDELSATFLEMKGHFYMHAGSLLLK
NLMMLTLSTRDVQESRELLESFDSALQSAKSSLGGNDELSATFLEMKGHFYMHAGSLLLK
NLMMLTLSTRDVQENRELLESFDSALQSAKSSLGGNDELSATFLEMKGHFYMHAGSLLLK
NLMMLTLSTRDVQESRELLESFDSALQSAKSSLGGNDELSATFLEMKGHFYMHAGSLLLK
NLMMLTLSTRDVQESRELLESFDSALQSAKSSLGGNDELSATFLEMKGHFYMHAGSLLLK
NLMMLTLSTRDVQESRELLESFDSALQSAKSSLGGNDELSATFLEMKGHFYMHAGSLLLK
NLMMLTLSTRDVQESRELLESFDSALQSAKSSLGGNDELSATFLEMKGHFYMHAGSLLLK
NLMMLTLSTRDVQESRELLESFDSALQSAKSSLGGNDELSATFLEMKGHFYMHAGSLLLK
NLMMLTLSTRDVQESRELLESFDSALQSVKFCAGGNELSATFLEVRGHFYMHAGSLLLK
NLMMLTLSTRDVQEGRELLESFDSALQSVKSSVGGNDELSATFLETKGHFYMHVGSLLLK
***** * * ***** * * :***** :***** :*****

```

[illegible][illegible]



|         |       |                |       |              |
|---------|-------|----------------|-------|--------------|
| 01:9606 | 87808 | 0#NP_001019628 | RGPD1 | Homo_sapiens |
| 01:9606 | 87808 | 0#NP_001032955 | RGPD6 | Homo_sapiens |
| 01:9606 | 87808 | 0#NP_001071638 | RGPD2 | Homo_sapiens |
| 01:9606 | 87808 | 0#NP_001116835 | RGPD6 | Homo_sapiens |
| 01:9606 | 87808 | 0#NP_001137485 | RGPD3 | Homo_sapiens |
| 01:9606 | 87808 | 0#NP_001157935 | RGPD8 | Homo_sapiens |
| 01:9606 | 87808 | 0#NP_005045    | RGPD5 | Homo_sapiens |
| 01:9606 | 87808 | 0#NP_115636    | RGPD5 | Homo_sapiens |
| 01:9606 | 87808 | 0#NP_872394    | RGPD4 | Homo_sapiens |
| 01:9606 | 87808 | NM_001024457   | RGPD1 | Homo_sapiens |
| 01:9606 | 87808 | NM_001037866   | RGPD6 | Homo_sapiens |

RWPTENYGPDSVPDGYQGSQTFHGAPLTVATTGPSVYYSQSPAYNSQYLLRPA-ANVTPT  
RWPTENYGPDSVPDGYQGSQTFHGAPLTEAAHRHFTIEKHG--DSKWIYRFTKQLC--  
RWPTENYGPDSVPDGYQGSQTFHGAPLTVATTGPSVYYSQSPAYNSQYLLRPA-ANVTPT  
RWPTENYGPDSVPDGYQGSQTFHGAPLTVATTGPSVYYSQSPAYNSQYLLRPA-ANVTPT  
RWPTENYGPDSVPDGYQGSQTFHGAPLTVATTGPSVYYSQSPAYNSQYLLRPA-ANVTPT  
RWPTENYGPDSVPDGYQGSQTFHGAPLTVATTGPSVYYSQSPAYNSQYLLRPA-ANVTPT  
RWPTENYGPDSVPDGYQGSQTFHGAPLTVATTGPSVYYSQSPAYNSQYLLRPA-ANVTPT  
RWPTENYGPDSVPDGYQGSQTFHGAPLTEAAHRHFTIEKHG--DSKWIYRFTKQLC--  
RWPTENYGPDSVPDGYQGSQTFHGAPLTVATTGPSVYYSQSPAYNSQYLLRPA-ANVTPT  
RWPTENYGPDSVPDGYQGSQTFHGAPLTVATTGPSVYYSQSPAYNSQYLLRPA-ANVTPT  
RWPTENYGPDSVPDGYQGSQTFHGAPLTEAAHRHFTIEKHG--DSKWIYRFTKQLC--

|          |       |              |        |              |                           |                                     |             |
|----------|-------|--------------|--------|--------------|---------------------------|-------------------------------------|-------------|
| 01:9606  | 87808 | NM_001078170 | RGPD2  | Homo_sapiens | RWPTENYGPDSVPDGYQGSQTFHGA | PLTVATTGPSVYYSQSPAYNSQYLLRPA-ANVTPT |             |
| 01:9606  | 87808 | NM_001123363 | RGPD6  | Homo_sapiens | RWPTENYGPDSVPDGYQGSQTFHGA | PLTVATTGPSVYYSQSPAYNSQYLLRPA-ANVTPT |             |
| 01:9606  | 87808 | NM_001144013 | RGPD3  | Homo_sapiens | RWPTENYGPDSVPDGYQGSQTFHGA | PLTVATTGPSVYYSQSPAYNSQYLLRPA-ANVTPT |             |
| 01:9606  | 87808 | NM_001164463 | RGPD8  | Homo_sapiens | RWPTENYGPDSVPDGYQGSQTFHGA | PLTVATTGPSVYYSQSPAYNSQYLLRPA-ANVTPT |             |
| 01:9606  | 87808 | NM_005054    | RGPD5  | Homo_sapiens | RWPTENYGPDSVPDGYQGSQTFHGA | PLTVATTGPSVYYSQSPAYNSQYLLRPA-ANVTPT |             |
| 01:9606  | 87808 | NM_032260    | RGPD5  | Homo_sapiens | RWPTENYGPDSVPDGYQGSQTFHGA | PLTEAAHRHFTIEKHG---DSKWI            | IYRFTKQLC-- |
| 01:9606  | 87808 | NM_182588    | RGPD4  | Homo_sapiens | RWPTENYGPDSVPDGYQGSQTFHGA | PLTVATTGPSVYYSQSPAYNSQYLLRPA-ANVTPT |             |
| 04:9913  | 87808 | NM_174592    | RANBP2 | Bos_taurus   | RWPPENYGPDPVPDSYQGSQNFHGA | PLTVATTGHSVCYSQSPAYNTQYLLRPAANV-TPT |             |
| 07:10090 | 87808 | NM_011240    | Ranbp2 | Mus_musculus | RWPAEPYGQDPAPDGYQGSQTFHGA | PLTVATTGPSVYYSQSPAYNSQYLLRPAANV-TPT |             |

|          |       |                |        |              |                         |                      |                  |
|----------|-------|----------------|--------|--------------|-------------------------|----------------------|------------------|
| 01:9606  | 87808 | 0#NP_001019628 | RGPD1  | Homo_sapiens | KGS-----                |                      |                  |
| 01:9606  | 87808 | 0#NP_001032955 | RGPD6  | Homo_sapiens | -GT-----                |                      |                  |
| 01:9606  | 87808 | 0#NP_001071638 | RGPD2  | Homo_sapiens | KGS-----                |                      |                  |
| 01:9606  | 87808 | 0#NP_001116835 | RGPD6  | Homo_sapiens | KGS-----                |                      |                  |
| 01:9606  | 87808 | 0#NP_001137485 | RGPD3  | Homo_sapiens | KGS-----                |                      |                  |
| 01:9606  | 87808 | 0#NP_001157935 | RGPD8  | Homo_sapiens | KGS-----                |                      |                  |
| 01:9606  | 87808 | 0#NP_005045    | RGPD5  | Homo_sapiens | KGS-----                |                      |                  |
| 01:9606  | 87808 | 0#NP_115636    | RGPD5  | Homo_sapiens | -GT-----                |                      |                  |
| 01:9606  | 87808 | 0#NP_872394    | RGPD4  | Homo_sapiens | KGS-----                |                      |                  |
| 01:9606  | 87808 | NM_001024457   | RGPD1  | Homo_sapiens | KGS-----                |                      |                  |
| 01:9606  | 87808 | NM_001037866   | RGPD6  | Homo_sapiens | -GT-----                |                      |                  |
| 01:9606  | 87808 | NM_001078170   | RGPD2  | Homo_sapiens | KGS-----                |                      |                  |
| 01:9606  | 87808 | NM_001123363   | RGPD6  | Homo_sapiens | KGS-----                |                      |                  |
| 01:9606  | 87808 | NM_001144013   | RGPD3  | Homo_sapiens | KGS-----                |                      |                  |
| 01:9606  | 87808 | NM_001164463   | RGPD8  | Homo_sapiens | KGS-----                |                      |                  |
| 01:9606  | 87808 | NM_005054      | RGPD5  | Homo_sapiens | KGS-----                |                      |                  |
| 01:9606  | 87808 | NM_032260      | RGPD5  | Homo_sapiens | -GT-----                |                      |                  |
| 01:9606  | 87808 | NM_182588      | RGPD4  | Homo_sapiens | KGS-----                |                      |                  |
| 04:9913  | 87808 | NM_174592      | RANBP2 | Bos_taurus   | KGPVYGMNRLPQQHVYGYPPQMH | TPPVQSSSACMFSDQMYGPP | LRFESPATGILSPRGD |
| 07:10090 | 87808 | NM_011240      | Ranbp2 | Mus_musculus | KGPVYGMNRLPQQHIYAYSQQMH | TPPVQSSSACMFSEQMYGPP | LRFESPATGILSPRGD |

|          |       |                |        |              |                         |                       |                  |
|----------|-------|----------------|--------|--------------|-------------------------|-----------------------|------------------|
| 01:9606  | 87808 | 0#NP_001019628 | RGPD1  | Homo_sapiens | -----                   |                       |                  |
| 01:9606  | 87808 | 0#NP_001032955 | RGPD6  | Homo_sapiens | -----                   |                       |                  |
| 01:9606  | 87808 | 0#NP_001071638 | RGPD2  | Homo_sapiens | -----                   |                       |                  |
| 01:9606  | 87808 | 0#NP_001116835 | RGPD6  | Homo_sapiens | -----                   |                       |                  |
| 01:9606  | 87808 | 0#NP_001137485 | RGPD3  | Homo_sapiens | -----                   |                       |                  |
| 01:9606  | 87808 | 0#NP_001157935 | RGPD8  | Homo_sapiens | -----                   |                       |                  |
| 01:9606  | 87808 | 0#NP_005045    | RGPD5  | Homo_sapiens | -----                   |                       |                  |
| 01:9606  | 87808 | 0#NP_115636    | RGPD5  | Homo_sapiens | -----                   |                       |                  |
| 01:9606  | 87808 | 0#NP_872394    | RGPD4  | Homo_sapiens | -----                   |                       |                  |
| 01:9606  | 87808 | NM_001024457   | RGPD1  | Homo_sapiens | -----                   |                       |                  |
| 01:9606  | 87808 | NM_001037866   | RGPD6  | Homo_sapiens | -----                   |                       |                  |
| 01:9606  | 87808 | NM_001078170   | RGPD2  | Homo_sapiens | -----                   |                       |                  |
| 01:9606  | 87808 | NM_001123363   | RGPD6  | Homo_sapiens | -----                   |                       |                  |
| 01:9606  | 87808 | NM_001144013   | RGPD3  | Homo_sapiens | -----                   |                       |                  |
| 01:9606  | 87808 | NM_001164463   | RGPD8  | Homo_sapiens | -----                   |                       |                  |
| 01:9606  | 87808 | NM_005054      | RGPD5  | Homo_sapiens | -----                   |                       |                  |
| 01:9606  | 87808 | NM_032260      | RGPD5  | Homo_sapiens | -----                   |                       |                  |
| 01:9606  | 87808 | NM_182588      | RGPD4  | Homo_sapiens | -----                   |                       |                  |
| 04:9913  | 87808 | NM_174592      | RANBP2 | Bos_taurus   | DYFNYNVQQTSTNPLPEPGYFTK | PPPLAAHASRSAEPKVLEFGK | TSFVQVPVPEGMRPSL |
| 07:10090 | 87808 | NM_011240      | Ranbp2 | Mus_musculus | DYFNYNVQQTSTNPLPEPGYFTK | PPPLVAHASRSAESKVIEFGK | SNFVQPMQGEVIRPPL |

|          |       |                |        |              |                         |                        |                  |
|----------|-------|----------------|--------|--------------|-------------------------|------------------------|------------------|
| 01:9606  | 87808 | 0#NP_001019628 | RGPD1  | Homo_sapiens | -----                   |                        |                  |
| 01:9606  | 87808 | 0#NP_001032955 | RGPD6  | Homo_sapiens | -----                   |                        |                  |
| 01:9606  | 87808 | 0#NP_001071638 | RGPD2  | Homo_sapiens | -----                   |                        |                  |
| 01:9606  | 87808 | 0#NP_001116835 | RGPD6  | Homo_sapiens | -----                   |                        |                  |
| 01:9606  | 87808 | 0#NP_001137485 | RGPD3  | Homo_sapiens | -----                   |                        |                  |
| 01:9606  | 87808 | 0#NP_001157935 | RGPD8  | Homo_sapiens | -----                   |                        |                  |
| 01:9606  | 87808 | 0#NP_005045    | RGPD5  | Homo_sapiens | -----                   |                        |                  |
| 01:9606  | 87808 | 0#NP_115636    | RGPD5  | Homo_sapiens | -----                   |                        |                  |
| 01:9606  | 87808 | 0#NP_872394    | RGPD4  | Homo_sapiens | -----                   |                        |                  |
| 01:9606  | 87808 | NM_001024457   | RGPD1  | Homo_sapiens | -----                   |                        |                  |
| 01:9606  | 87808 | NM_001037866   | RGPD6  | Homo_sapiens | -----                   |                        |                  |
| 01:9606  | 87808 | NM_001078170   | RGPD2  | Homo_sapiens | -----                   |                        |                  |
| 01:9606  | 87808 | NM_001123363   | RGPD6  | Homo_sapiens | -----                   |                        |                  |
| 01:9606  | 87808 | NM_001144013   | RGPD3  | Homo_sapiens | -----                   |                        |                  |
| 01:9606  | 87808 | NM_001164463   | RGPD8  | Homo_sapiens | -----                   |                        |                  |
| 01:9606  | 87808 | NM_005054      | RGPD5  | Homo_sapiens | -----                   |                        |                  |
| 01:9606  | 87808 | NM_032260      | RGPD5  | Homo_sapiens | -----                   |                        |                  |
| 01:9606  | 87808 | NM_182588      | RGPD4  | Homo_sapiens | -----                   |                        |                  |
| 04:9913  | 87808 | NM_174592      | RANBP2 | Bos_taurus   | AAPAHTTQPTPFKFNSNFKSNDG | DFTFSSPQVVAQPPATSYNNNE | SLGLLTSDKPLQGD   |
| 07:10090 | 87808 | NM_011240      | Ranbp2 | Mus_musculus | TTPAHTTQPTPFKFNSNFKSNDG | DFTFSSPQVVAQPPSTAYSNS  | SESLGLLTSDKPLQGD |

|         |       |                |       |              |       |
|---------|-------|----------------|-------|--------------|-------|
| 01:9606 | 87808 | 0#NP_001019628 | RGPD1 | Homo_sapiens | ----- |
| 01:9606 | 87808 | 0#NP_001032955 | RGPD6 | Homo_sapiens | ----- |
| 01:9606 | 87808 | 0#NP_001071638 | RGPD2 | Homo_sapiens | ----- |
| 01:9606 | 87808 | 0#NP_001116835 | RGPD6 | Homo_sapiens | ----- |
| 01:9606 | 87808 | 0#NP_001137485 | RGPD3 | Homo_sapiens | ----- |
| 01:9606 | 87808 | 0#NP_001157935 | RGPD8 | Homo_sapiens | ----- |
| 01:9606 | 87808 | 0#NP_005045    | RGPD5 | Homo_sapiens | ----- |
| 01:9606 | 87808 | 0#NP_115636    | RGPD5 | Homo_sapiens | ----- |
| 01:9606 | 87808 | 0#NP_872394    | RGPD4 | Homo_sapiens | ----- |

|          |       |              |        |              |                                                              |
|----------|-------|--------------|--------|--------------|--------------------------------------------------------------|
| 01:9606  | 87808 | NM_001024457 | RGPD1  | Homo_sapiens | -----                                                        |
| 01:9606  | 87808 | NM_001037866 | RGPD6  | Homo_sapiens | -----                                                        |
| 01:9606  | 87808 | NM_001078170 | RGPD2  | Homo_sapiens | -----                                                        |
| 01:9606  | 87808 | NM_001123363 | RGPD6  | Homo_sapiens | -----                                                        |
| 01:9606  | 87808 | NM_001144013 | RGPD3  | Homo_sapiens | -----                                                        |
| 01:9606  | 87808 | NM_001164463 | RGPD8  | Homo_sapiens | -----                                                        |
| 01:9606  | 87808 | NM_005054    | RGPD5  | Homo_sapiens | -----                                                        |
| 01:9606  | 87808 | NM_032260    | RGPD5  | Homo_sapiens | -----                                                        |
| 01:9606  | 87808 | NM_182588    | RGPD4  | Homo_sapiens | -----                                                        |
| 04:9913  | 87808 | NM_174592    | RANBP2 | Bos_taurus   | GYSGPKA--AQNMGRNTNFNGSKNVPGISFTENMGTNQPKNSGFRRSDDMFTFYSPGKS  |
| 07:10090 | 87808 | NM_011240    | Ranbp2 | Mus_musculus | GYSGLKPIISGQASGRNTFSFGSKNT----LTENMGPNQQKNFGFHRSDDMFAFHGPGKS |

|          |       |                |        |              |                                                             |
|----------|-------|----------------|--------|--------------|-------------------------------------------------------------|
| 01:9606  | 87808 | 0#NP_001019628 | RGPD1  | Homo_sapiens | -----                                                       |
| 01:9606  | 87808 | 0#NP_001032955 | RGPD6  | Homo_sapiens | -----                                                       |
| 01:9606  | 87808 | 0#NP_001071638 | RGPD2  | Homo_sapiens | -----                                                       |
| 01:9606  | 87808 | 0#NP_001116835 | RGPD6  | Homo_sapiens | -----                                                       |
| 01:9606  | 87808 | 0#NP_001137485 | RGPD3  | Homo_sapiens | -----                                                       |
| 01:9606  | 87808 | 0#NP_001157935 | RGPD8  | Homo_sapiens | -----                                                       |
| 01:9606  | 87808 | 0#NP_005045    | RGPD5  | Homo_sapiens | -----                                                       |
| 01:9606  | 87808 | 0#NP_115636    | RGPD5  | Homo_sapiens | -----                                                       |
| 01:9606  | 87808 | 0#NP_872394    | RGPD4  | Homo_sapiens | -----                                                       |
| 01:9606  | 87808 | NM_001024457   | RGPD1  | Homo_sapiens | -----                                                       |
| 01:9606  | 87808 | NM_001037866   | RGPD6  | Homo_sapiens | -----                                                       |
| 01:9606  | 87808 | NM_001078170   | RGPD2  | Homo_sapiens | -----                                                       |
| 01:9606  | 87808 | NM_001123363   | RGPD6  | Homo_sapiens | -----                                                       |
| 01:9606  | 87808 | NM_001144013   | RGPD3  | Homo_sapiens | -----                                                       |
| 01:9606  | 87808 | NM_001164463   | RGPD8  | Homo_sapiens | -----                                                       |
| 01:9606  | 87808 | NM_005054      | RGPD5  | Homo_sapiens | -----                                                       |
| 01:9606  | 87808 | NM_032260      | RGPD5  | Homo_sapiens | -----                                                       |
| 01:9606  | 87808 | NM_182588      | RGPD4  | Homo_sapiens | -----                                                       |
| 04:9913  | 87808 | NM_174592      | RANBP2 | Bos_taurus   | VFGVPATEPASKGHDADGGSAQGDEEDDGPHFEPVVPLPDKIEVRTGEDEEEFFCNRAK |
| 07:10090 | 87808 | NM_011240      | Ranbp2 | Mus_musculus | VFTTAASELANKSHETDGGSAHGDEEDDGPHFEPVVPLPDKIEVKTGEDEEEFFCNRAK |

|          |       |                |        |              |                                                              |
|----------|-------|----------------|--------|--------------|--------------------------------------------------------------|
| 01:9606  | 87808 | 0#NP_001019628 | RGPD1  | Homo_sapiens | -----                                                        |
| 01:9606  | 87808 | 0#NP_001032955 | RGPD6  | Homo_sapiens | -----                                                        |
| 01:9606  | 87808 | 0#NP_001071638 | RGPD2  | Homo_sapiens | -----                                                        |
| 01:9606  | 87808 | 0#NP_001116835 | RGPD6  | Homo_sapiens | -----                                                        |
| 01:9606  | 87808 | 0#NP_001137485 | RGPD3  | Homo_sapiens | -----                                                        |
| 01:9606  | 87808 | 0#NP_001157935 | RGPD8  | Homo_sapiens | -----                                                        |
| 01:9606  | 87808 | 0#NP_005045    | RGPD5  | Homo_sapiens | -----                                                        |
| 01:9606  | 87808 | 0#NP_115636    | RGPD5  | Homo_sapiens | -----                                                        |
| 01:9606  | 87808 | 0#NP_872394    | RGPD4  | Homo_sapiens | -----                                                        |
| 01:9606  | 87808 | NM_001024457   | RGPD1  | Homo_sapiens | -----                                                        |
| 01:9606  | 87808 | NM_001037866   | RGPD6  | Homo_sapiens | -----                                                        |
| 01:9606  | 87808 | NM_001078170   | RGPD2  | Homo_sapiens | -----                                                        |
| 01:9606  | 87808 | NM_001123363   | RGPD6  | Homo_sapiens | -----                                                        |
| 01:9606  | 87808 | NM_001144013   | RGPD3  | Homo_sapiens | -----                                                        |
| 01:9606  | 87808 | NM_001164463   | RGPD8  | Homo_sapiens | -----                                                        |
| 01:9606  | 87808 | NM_005054      | RGPD5  | Homo_sapiens | -----                                                        |
| 01:9606  | 87808 | NM_032260      | RGPD5  | Homo_sapiens | -----                                                        |
| 01:9606  | 87808 | NM_182588      | RGPD4  | Homo_sapiens | -----                                                        |
| 04:9913  | 87808 | NM_174592      | RANBP2 | Bos_taurus   | LYRFDAASREWKERGIGNVKILRHKTSGKIRLLMRREQVLKICANHYSISPMALAPNAGS |
| 07:10090 | 87808 | NM_011240      | Ranbp2 | Mus_musculus | LFRFDGESKEWKERGIGNVKILRHKTSGKIRLLMRREQVLKICANHYSISPMKLTNPAGS |

|          |       |                |        |              |                                                                |
|----------|-------|----------------|--------|--------------|----------------------------------------------------------------|
| 01:9606  | 87808 | 0#NP_001019628 | RGPD1  | Homo_sapiens | -----                                                          |
| 01:9606  | 87808 | 0#NP_001032955 | RGPD6  | Homo_sapiens | -----                                                          |
| 01:9606  | 87808 | 0#NP_001071638 | RGPD2  | Homo_sapiens | -----                                                          |
| 01:9606  | 87808 | 0#NP_001116835 | RGPD6  | Homo_sapiens | -----                                                          |
| 01:9606  | 87808 | 0#NP_001137485 | RGPD3  | Homo_sapiens | -----                                                          |
| 01:9606  | 87808 | 0#NP_001157935 | RGPD8  | Homo_sapiens | -----                                                          |
| 01:9606  | 87808 | 0#NP_005045    | RGPD5  | Homo_sapiens | -----                                                          |
| 01:9606  | 87808 | 0#NP_115636    | RGPD5  | Homo_sapiens | -----                                                          |
| 01:9606  | 87808 | 0#NP_872394    | RGPD4  | Homo_sapiens | -----                                                          |
| 01:9606  | 87808 | NM_001024457   | RGPD1  | Homo_sapiens | -----                                                          |
| 01:9606  | 87808 | NM_001037866   | RGPD6  | Homo_sapiens | -----                                                          |
| 01:9606  | 87808 | NM_001078170   | RGPD2  | Homo_sapiens | -----                                                          |
| 01:9606  | 87808 | NM_001123363   | RGPD6  | Homo_sapiens | -----                                                          |
| 01:9606  | 87808 | NM_001144013   | RGPD3  | Homo_sapiens | -----                                                          |
| 01:9606  | 87808 | NM_001164463   | RGPD8  | Homo_sapiens | -----                                                          |
| 01:9606  | 87808 | NM_005054      | RGPD5  | Homo_sapiens | -----                                                          |
| 01:9606  | 87808 | NM_032260      | RGPD5  | Homo_sapiens | -----                                                          |
| 01:9606  | 87808 | NM_182588      | RGPD4  | Homo_sapiens | -----                                                          |
| 04:9913  | 87808 | NM_174592      | RANBP2 | Bos_taurus   | DRSFVVWYALDYADESPKPEQLAIRFKTPEEAAALFKCKFEEAQSLLKASGANVATTTHQAT |
| 07:10090 | 87808 | NM_011240      | Ranbp2 | Mus_musculus | DRSFVWHALDYADELPKPEQLAIRFKTPEEAAALFKCKFEEAQNILKALGTNTSTAPNHTL  |

|         |       |                |       |              |       |
|---------|-------|----------------|-------|--------------|-------|
| 01:9606 | 87808 | 0#NP_001019628 | RGPD1 | Homo_sapiens | ----- |
| 01:9606 | 87808 | 0#NP_001032955 | RGPD6 | Homo_sapiens | ----- |
| 01:9606 | 87808 | 0#NP_001071638 | RGPD2 | Homo_sapiens | ----- |
| 01:9606 | 87808 | 0#NP_001116835 | RGPD6 | Homo_sapiens | ----- |
| 01:9606 | 87808 | 0#NP_001137485 | RGPD3 | Homo_sapiens | ----- |
| 01:9606 | 87808 | 0#NP_001157935 | RGPD8 | Homo_sapiens | ----- |
| 01:9606 | 87808 | 0#NP_005045    | RGPD5 | Homo_sapiens | ----- |

|          |       |              |        |              |                                                            |
|----------|-------|--------------|--------|--------------|------------------------------------------------------------|
| 01:9606  | 87808 | 0#NP_115636  | RGPD5  | Homo_sapiens | -----                                                      |
| 01:9606  | 87808 | 0#NP_872394  | RGPD4  | Homo_sapiens | -----                                                      |
| 01:9606  | 87808 | NM_001024457 | RGPD1  | Homo_sapiens | -----                                                      |
| 01:9606  | 87808 | NM_001037866 | RGPD6  | Homo_sapiens | -----                                                      |
| 01:9606  | 87808 | NM_001078170 | RGPD2  | Homo_sapiens | -----                                                      |
| 01:9606  | 87808 | NM_001123363 | RGPD6  | Homo_sapiens | -----                                                      |
| 01:9606  | 87808 | NM_001144013 | RGPD3  | Homo_sapiens | -----                                                      |
| 01:9606  | 87808 | NM_001164463 | RGPD8  | Homo_sapiens | -----                                                      |
| 01:9606  | 87808 | NM_005054    | RGPD5  | Homo_sapiens | -----                                                      |
| 01:9606  | 87808 | NM_032260    | RGPD5  | Homo_sapiens | -----                                                      |
| 01:9606  | 87808 | NM_182588    | RGPD4  | Homo_sapiens | -----                                                      |
| 04:9913  | 87808 | NM_174592    | RANBP2 | Bos_taurus   | KTVKEPTGHDSDKIDKSDGVTMNFQVAKKEGSWWYCNSCSLKNMATAKKCVSCQNLNP |
| 07:10090 | 87808 | NM_011240    | Ranbp2 | Mus_musculus | RIVKESATQDNKDICKADGGNLNFQIVKKEGPYWNCNSCSFKNAATAKKCVSCQNTNP |

|          |       |                |        |              |                                                              |
|----------|-------|----------------|--------|--------------|--------------------------------------------------------------|
| 01:9606  | 87808 | 0#NP_001019628 | RGPD1  | Homo_sapiens | -----                                                        |
| 01:9606  | 87808 | 0#NP_001032955 | RGPD6  | Homo_sapiens | -----                                                        |
| 01:9606  | 87808 | 0#NP_001071638 | RGPD2  | Homo_sapiens | -----                                                        |
| 01:9606  | 87808 | 0#NP_001116835 | RGPD6  | Homo_sapiens | -----                                                        |
| 01:9606  | 87808 | 0#NP_001137485 | RGPD3  | Homo_sapiens | -----                                                        |
| 01:9606  | 87808 | 0#NP_001157935 | RGPD8  | Homo_sapiens | -----                                                        |
| 01:9606  | 87808 | 0#NP_005045    | RGPD5  | Homo_sapiens | -----                                                        |
| 01:9606  | 87808 | 0#NP_115636    | RGPD5  | Homo_sapiens | -----                                                        |
| 01:9606  | 87808 | 0#NP_872394    | RGPD4  | Homo_sapiens | -----                                                        |
| 01:9606  | 87808 | NM_001024457   | RGPD1  | Homo_sapiens | -----                                                        |
| 01:9606  | 87808 | NM_001037866   | RGPD6  | Homo_sapiens | -----                                                        |
| 01:9606  | 87808 | NM_001078170   | RGPD2  | Homo_sapiens | -----                                                        |
| 01:9606  | 87808 | NM_001123363   | RGPD6  | Homo_sapiens | -----                                                        |
| 01:9606  | 87808 | NM_001144013   | RGPD3  | Homo_sapiens | -----                                                        |
| 01:9606  | 87808 | NM_001164463   | RGPD8  | Homo_sapiens | -----                                                        |
| 01:9606  | 87808 | NM_005054      | RGPD5  | Homo_sapiens | -----                                                        |
| 01:9606  | 87808 | NM_032260      | RGPD5  | Homo_sapiens | -----                                                        |
| 01:9606  | 87808 | NM_182588      | RGPD4  | Homo_sapiens | -----                                                        |
| 04:9913  | 87808 | NM_174592      | RANBP2 | Bos_taurus   | GS-KELGPPVLVETISTPKPSSEHTPGRSALVTLKNEGHWNCGVCLVRNEPTVSRCIACQ |
| 07:10090 | 87808 | NM_011240      | Ranbp2 | Mus_musculus | TSNKELGPPVLVENGFAPKTGLENAQDRFATMTANKEGHWDSCVCLVRNEPTVSRCIACQ |

|          |       |                |        |              |                                                              |
|----------|-------|----------------|--------|--------------|--------------------------------------------------------------|
| 01:9606  | 87808 | 0#NP_001019628 | RGPD1  | Homo_sapiens | -----                                                        |
| 01:9606  | 87808 | 0#NP_001032955 | RGPD6  | Homo_sapiens | -----                                                        |
| 01:9606  | 87808 | 0#NP_001071638 | RGPD2  | Homo_sapiens | -----                                                        |
| 01:9606  | 87808 | 0#NP_001116835 | RGPD6  | Homo_sapiens | -----                                                        |
| 01:9606  | 87808 | 0#NP_001137485 | RGPD3  | Homo_sapiens | -----                                                        |
| 01:9606  | 87808 | 0#NP_001157935 | RGPD8  | Homo_sapiens | -----                                                        |
| 01:9606  | 87808 | 0#NP_005045    | RGPD5  | Homo_sapiens | -----                                                        |
| 01:9606  | 87808 | 0#NP_115636    | RGPD5  | Homo_sapiens | -----                                                        |
| 01:9606  | 87808 | 0#NP_872394    | RGPD4  | Homo_sapiens | -----                                                        |
| 01:9606  | 87808 | NM_001024457   | RGPD1  | Homo_sapiens | -----                                                        |
| 01:9606  | 87808 | NM_001037866   | RGPD6  | Homo_sapiens | -----                                                        |
| 01:9606  | 87808 | NM_001078170   | RGPD2  | Homo_sapiens | -----                                                        |
| 01:9606  | 87808 | NM_001123363   | RGPD6  | Homo_sapiens | -----                                                        |
| 01:9606  | 87808 | NM_001144013   | RGPD3  | Homo_sapiens | -----                                                        |
| 01:9606  | 87808 | NM_001164463   | RGPD8  | Homo_sapiens | -----                                                        |
| 01:9606  | 87808 | NM_005054      | RGPD5  | Homo_sapiens | -----                                                        |
| 01:9606  | 87808 | NM_032260      | RGPD5  | Homo_sapiens | -----                                                        |
| 01:9606  | 87808 | NM_182588      | RGPD4  | Homo_sapiens | -----                                                        |
| 04:9913  | 87808 | NM_174592      | RANBP2 | Bos_taurus   | NKKPASKSESPLIKQPSFKFGQGDLPKAASSDFKSVFSVKEGQWDCSVCLIGNEGSSVKC |
| 07:10090 | 87808 | NM_011240      | Ranbp2 | Mus_musculus | NTKSAS-----SFVQTSFKFGQGDLPKSVDSDFRSVFSKKEGQWECSVCLVRNERSAKKC |

|          |       |                |        |              |                                                             |
|----------|-------|----------------|--------|--------------|-------------------------------------------------------------|
| 01:9606  | 87808 | 0#NP_001019628 | RGPD1  | Homo_sapiens | -----                                                       |
| 01:9606  | 87808 | 0#NP_001032955 | RGPD6  | Homo_sapiens | -----                                                       |
| 01:9606  | 87808 | 0#NP_001071638 | RGPD2  | Homo_sapiens | -----                                                       |
| 01:9606  | 87808 | 0#NP_001116835 | RGPD6  | Homo_sapiens | -----                                                       |
| 01:9606  | 87808 | 0#NP_001137485 | RGPD3  | Homo_sapiens | -----                                                       |
| 01:9606  | 87808 | 0#NP_001157935 | RGPD8  | Homo_sapiens | -----                                                       |
| 01:9606  | 87808 | 0#NP_005045    | RGPD5  | Homo_sapiens | -----                                                       |
| 01:9606  | 87808 | 0#NP_115636    | RGPD5  | Homo_sapiens | -----                                                       |
| 01:9606  | 87808 | 0#NP_872394    | RGPD4  | Homo_sapiens | -----                                                       |
| 01:9606  | 87808 | NM_001024457   | RGPD1  | Homo_sapiens | -----                                                       |
| 01:9606  | 87808 | NM_001037866   | RGPD6  | Homo_sapiens | -----                                                       |
| 01:9606  | 87808 | NM_001078170   | RGPD2  | Homo_sapiens | -----                                                       |
| 01:9606  | 87808 | NM_001123363   | RGPD6  | Homo_sapiens | -----                                                       |
| 01:9606  | 87808 | NM_001144013   | RGPD3  | Homo_sapiens | -----                                                       |
| 01:9606  | 87808 | NM_001164463   | RGPD8  | Homo_sapiens | -----                                                       |
| 01:9606  | 87808 | NM_005054      | RGPD5  | Homo_sapiens | -----                                                       |
| 01:9606  | 87808 | NM_032260      | RGPD5  | Homo_sapiens | -----                                                       |
| 01:9606  | 87808 | NM_182588      | RGPD4  | Homo_sapiens | -----                                                       |
| 04:9913  | 87808 | NM_174592      | RANBP2 | Bos_taurus   | EACQTPRKQSSP-----AFAAPAPASLKFGTSETSKTPKS                    |
| 07:10090 | 87808 | NM_011240      | Ranbp2 | Mus_musculus | VACENPGKQFKEWHCSLCSVKNEAHAIKCVACNNPVTPLSTAPPSFKFGTSEMSKPFRI |

|         |       |                |       |              |       |
|---------|-------|----------------|-------|--------------|-------|
| 01:9606 | 87808 | 0#NP_001019628 | RGPD1 | Homo_sapiens | ----- |
| 01:9606 | 87808 | 0#NP_001032955 | RGPD6 | Homo_sapiens | ----- |
| 01:9606 | 87808 | 0#NP_001071638 | RGPD2 | Homo_sapiens | ----- |
| 01:9606 | 87808 | 0#NP_001116835 | RGPD6 | Homo_sapiens | ----- |
| 01:9606 | 87808 | 0#NP_001137485 | RGPD3 | Homo_sapiens | ----- |

|          |       |                |        |              |                                                                |
|----------|-------|----------------|--------|--------------|----------------------------------------------------------------|
| 01:9606  | 87808 | 0#NP_001157935 | RGPD8  | Homo_sapiens | -----                                                          |
| 01:9606  | 87808 | 0#NP_005045    | RGPD5  | Homo_sapiens | -----                                                          |
| 01:9606  | 87808 | 0#NP_115636    | RGPD5  | Homo_sapiens | -----                                                          |
| 01:9606  | 87808 | 0#NP_872394    | RGPD4  | Homo_sapiens | -----                                                          |
| 01:9606  | 87808 | NM_001024457   | RGPD1  | Homo_sapiens | -----                                                          |
| 01:9606  | 87808 | NM_001037866   | RGPD6  | Homo_sapiens | -----                                                          |
| 01:9606  | 87808 | NM_001078170   | RGPD2  | Homo_sapiens | -----                                                          |
| 01:9606  | 87808 | NM_001123363   | RGPD6  | Homo_sapiens | -----                                                          |
| 01:9606  | 87808 | NM_001144013   | RGPD3  | Homo_sapiens | -----                                                          |
| 01:9606  | 87808 | NM_001164463   | RGPD8  | Homo_sapiens | -----                                                          |
| 01:9606  | 87808 | NM_005054      | RGPD5  | Homo_sapiens | -----                                                          |
| 01:9606  | 87808 | NM_032260      | RGPD5  | Homo_sapiens | -----                                                          |
| 01:9606  | 87808 | NM_182588      | RGPD4  | Homo_sapiens | -----                                                          |
| 04:9913  | 87808 | NM_174592      | RANBP2 | Bos_taurus   | -----                                                          |
| 07:10090 | 87808 | NM_011240      | Ranbp2 | Mus_musculus | -----                                                          |
|          |       |                |        |              | GFEGVFTKKEGQWDCSV---QNEASMAECVACQNPNG-QNPPASAAPAPASSETVTKAPKSG |
|          |       |                |        |              | GFEGMFAKKEGQWDCSLCFVRNEASATHCIAQYPNKQNPQPTSCVSAFASSETSRSPKSG   |

|          |       |                |        |              |                                                                |
|----------|-------|----------------|--------|--------------|----------------------------------------------------------------|
| 01:9606  | 87808 | 0#NP_001019628 | RGPD1  | Homo_sapiens | -----                                                          |
| 01:9606  | 87808 | 0#NP_001032955 | RGPD6  | Homo_sapiens | -----                                                          |
| 01:9606  | 87808 | 0#NP_001071638 | RGPD2  | Homo_sapiens | -----                                                          |
| 01:9606  | 87808 | 0#NP_001116835 | RGPD6  | Homo_sapiens | -----                                                          |
| 01:9606  | 87808 | 0#NP_001137485 | RGPD3  | Homo_sapiens | -----                                                          |
| 01:9606  | 87808 | 0#NP_001157935 | RGPD8  | Homo_sapiens | -----                                                          |
| 01:9606  | 87808 | 0#NP_005045    | RGPD5  | Homo_sapiens | -----                                                          |
| 01:9606  | 87808 | 0#NP_115636    | RGPD5  | Homo_sapiens | -----                                                          |
| 01:9606  | 87808 | 0#NP_872394    | RGPD4  | Homo_sapiens | -----                                                          |
| 01:9606  | 87808 | NM_001024457   | RGPD1  | Homo_sapiens | -----                                                          |
| 01:9606  | 87808 | NM_001037866   | RGPD6  | Homo_sapiens | -----                                                          |
| 01:9606  | 87808 | NM_001078170   | RGPD2  | Homo_sapiens | -----                                                          |
| 01:9606  | 87808 | NM_001123363   | RGPD6  | Homo_sapiens | -----                                                          |
| 01:9606  | 87808 | NM_001144013   | RGPD3  | Homo_sapiens | -----                                                          |
| 01:9606  | 87808 | NM_001164463   | RGPD8  | Homo_sapiens | -----                                                          |
| 01:9606  | 87808 | NM_005054      | RGPD5  | Homo_sapiens | -----                                                          |
| 01:9606  | 87808 | NM_032260      | RGPD5  | Homo_sapiens | -----                                                          |
| 01:9606  | 87808 | NM_182588      | RGPD4  | Homo_sapiens | -----                                                          |
| 04:9913  | 87808 | NM_174592      | RANBP2 | Bos_taurus   | -----                                                          |
| 07:10090 | 87808 | NM_011240      | Ranbp2 | Mus_musculus | -----                                                          |
|          |       |                |        |              | LEGLFAKKEGQWDCDVCLIRNEGSSSPKCVACGASNPTQNPAAEVPLSFPVVGSTAEAGNSC |
|          |       |                |        |              | FEGLFPKKEGEWECAVCSQVNESSLKCVACEASKPTHKPH-EAPSAFTVGSKSQSNESA    |

|          |       |                |        |              |                                                               |
|----------|-------|----------------|--------|--------------|---------------------------------------------------------------|
| 01:9606  | 87808 | 0#NP_001019628 | RGPD1  | Homo_sapiens | -----SNTFEFKSTKE--GFSI                                        |
| 01:9606  | 87808 | 0#NP_001032955 | RGPD6  | Homo_sapiens | -----ERARAKI-----S-                                           |
| 01:9606  | 87808 | 0#NP_001071638 | RGPD2  | Homo_sapiens | -----SNTFEFKSTKE--GFSI                                        |
| 01:9606  | 87808 | 0#NP_001116835 | RGPD6  | Homo_sapiens | -----SNTFEFKSTKE--GFSI                                        |
| 01:9606  | 87808 | 0#NP_001137485 | RGPD3  | Homo_sapiens | -----SNTFEFKSTKE--GFSI                                        |
| 01:9606  | 87808 | 0#NP_001157935 | RGPD8  | Homo_sapiens | -----SNTFEFKSTKE--GFSI                                        |
| 01:9606  | 87808 | 0#NP_005045    | RGPD5  | Homo_sapiens | -----SNTFEFKSTKE--GFSI                                        |
| 01:9606  | 87808 | 0#NP_115636    | RGPD5  | Homo_sapiens | -----ERARAKI-----S-                                           |
| 01:9606  | 87808 | 0#NP_872394    | RGPD4  | Homo_sapiens | -----SNTFEFKSTKE--GFSI                                        |
| 01:9606  | 87808 | NM_001024457   | RGPD1  | Homo_sapiens | -----SNTFEFKSTKE--GFSI                                        |
| 01:9606  | 87808 | NM_001037866   | RGPD6  | Homo_sapiens | -----ERARAKI-----S-                                           |
| 01:9606  | 87808 | NM_001078170   | RGPD2  | Homo_sapiens | -----SNTFEFKSTKE--GFSI                                        |
| 01:9606  | 87808 | NM_001123363   | RGPD6  | Homo_sapiens | -----SNTFEFKSTKE--GFSI                                        |
| 01:9606  | 87808 | NM_001144013   | RGPD3  | Homo_sapiens | -----SNTFEFKSTKE--GFSI                                        |
| 01:9606  | 87808 | NM_001164463   | RGPD8  | Homo_sapiens | -----SNTFEFKSTKE--GFSI                                        |
| 01:9606  | 87808 | NM_005054      | RGPD5  | Homo_sapiens | -----SNTFEFKSTKE--GFSI                                        |
| 01:9606  | 87808 | NM_032260      | RGPD5  | Homo_sapiens | -----ERARAKI-----S-                                           |
| 01:9606  | 87808 | NM_182588      | RGPD4  | Homo_sapiens | -----SNTFEFKSTKE--GFSI                                        |
| 04:9913  | 87808 | NM_174592      | RANBP2 | Bos_taurus   | -----                                                         |
| 07:10090 | 87808 | NM_011240      | Ranbp2 | Mus_musculus | -----                                                         |
|          |       |                |        |              | ASQTGTGTFKSNFSEKAFKFGNAEQGFKFGHVDQENAPSFKFQSSSNTDSKSAKEGFSFSS |
|          |       |                |        |              | GSQVGTGTEFKSNFPEKNFKVGISEQKFKFGHVDQEKTPSFQSGSNTFEFKSIKDGFSFCI |
|          |       |                |        |              | ... *                                                         |

|          |       |                |        |              |                                                               |
|----------|-------|----------------|--------|--------------|---------------------------------------------------------------|
| 01:9606  | 87808 | 0#NP_001019628 | RGPD1  | Homo_sapiens | -----                                                         |
| 01:9606  | 87808 | 0#NP_001032955 | RGPD6  | Homo_sapiens | -----                                                         |
| 01:9606  | 87808 | 0#NP_001071638 | RGPD2  | Homo_sapiens | -----                                                         |
| 01:9606  | 87808 | 0#NP_001116835 | RGPD6  | Homo_sapiens | -----                                                         |
| 01:9606  | 87808 | 0#NP_001137485 | RGPD3  | Homo_sapiens | -----                                                         |
| 01:9606  | 87808 | 0#NP_001157935 | RGPD8  | Homo_sapiens | -----                                                         |
| 01:9606  | 87808 | 0#NP_005045    | RGPD5  | Homo_sapiens | -----                                                         |
| 01:9606  | 87808 | 0#NP_115636    | RGPD5  | Homo_sapiens | -----                                                         |
| 01:9606  | 87808 | 0#NP_872394    | RGPD4  | Homo_sapiens | -----                                                         |
| 01:9606  | 87808 | NM_001024457   | RGPD1  | Homo_sapiens | -----                                                         |
| 01:9606  | 87808 | NM_001037866   | RGPD6  | Homo_sapiens | -----                                                         |
| 01:9606  | 87808 | NM_001078170   | RGPD2  | Homo_sapiens | -----                                                         |
| 01:9606  | 87808 | NM_001123363   | RGPD6  | Homo_sapiens | -----                                                         |
| 01:9606  | 87808 | NM_001144013   | RGPD3  | Homo_sapiens | -----                                                         |
| 01:9606  | 87808 | NM_001164463   | RGPD8  | Homo_sapiens | -----                                                         |
| 01:9606  | 87808 | NM_005054      | RGPD5  | Homo_sapiens | -----                                                         |
| 01:9606  | 87808 | NM_032260      | RGPD5  | Homo_sapiens | -----                                                         |
| 01:9606  | 87808 | NM_182588      | RGPD4  | Homo_sapiens | -----                                                         |
| 04:9913  | 87808 | NM_174592      | RANBP2 | Bos_taurus   | -----                                                         |
| 07:10090 | 87808 | NM_011240      | Ranbp2 | Mus_musculus | -----                                                         |
|          |       |                |        |              | AVSADGFKFGISEPGNQEKKSEKPLENDTGFGQAQDISGQKNRGRVIFGQTSSTFTFADVA |
|          |       |                |        |              | AVSADGFKFGISEPGNQEKKSEKPLENDTGFGQAQDISGQKNRGRVIFGQTSSTFTFADVA |
|          |       |                |        |              | PVSADGFKFGISEPGNQEKKREKPLENDTGFGQAQDISGRKKGRGVIFGQTSSTFTFADVA |
|          |       |                |        |              | PVSADGFKFGISEPGNQEKKSEKPLENDTGLQAQDISGRKKGRGVIFGQTSSTFTFADVA  |
|          |       |                |        |              | PVSADGFKFGISEPGNQEKKREKPLENDTGLQAQDIRGRKKGRGVIFGQTSSTFTFADVA  |
|          |       |                |        |              | PVSADGFKFGISEPGNQEKKREKPLENDTGFGQAQDISGRKKGRGVIFGQTSSTFTFADVA |
|          |       |                |        |              | PVSADGFKFGISEPGNQEKKSEKPLENDTGFGQAQDISGQKNRGRVIFGQTSSTFTFADVA |
|          |       |                |        |              | PVSADGFKFGISEPGNQEKKSEKPLENDTGFGQAQDISGQKNRGRVIFGQTSSTFTFADVA |
|          |       |                |        |              | PVSADGFKFGISEPGNQEKKSEKPLENDTGFGQAQDISGQKNRGRVIFGQTSSTFTFADVA |
|          |       |                |        |              | PVSADGFKFGISEPGNQEKKSEKPLENDTGLQAQDISGRKKGRGVIFGQTSSTFTFADVA  |
|          |       |                |        |              | PVSADGFKFGISEPGNQEKKREKPLENDTGLQAQDIRGRKKGRGVIFGQTSSTFTFADVA  |
|          |       |                |        |              | PVSADGFKFGISEPGNQEKKREKPLENDTGFGQAQDISGRKKGRGVIFGQTSSTFTFADVA |
|          |       |                |        |              | -----                                                         |
|          |       |                |        |              | PVSADGFKFGISEPGNQEKKSEKPLENDTGFGQAQDISGQKNRGRVIFGQTSSTFTFADVA |
|          |       |                |        |              | PASAGGFKFGIQETENQEKTTSEKSFGEDTGGQAQDTGGQKDGSTVVFGQTSSTFTFADLA |
|          |       |                |        |              | PVSADGFKFGIQEKNQEKKSEKPLENDPSFQAHDTSQGKNGSGVVFGQTSSTFTFADLA   |

|         |       |                |       |              |                                                               |
|---------|-------|----------------|-------|--------------|---------------------------------------------------------------|
| 01:9606 | 87808 | 0#NP_001019628 | RGPD1 | Homo_sapiens | -----                                                         |
| 01:9606 | 87808 | 0#NP_001032955 | RGPD6 | Homo_sapiens | -----                                                         |
| 01:9606 | 87808 | 0#NP_001071638 | RGPD2 | Homo_sapiens | -----                                                         |
|         |       |                |       |              | KSTSGEGFQFGKKDPNFKGFSGAGEKLFSSQCGKMANKANTSGDFEKDDDDACKTEDSDDI |
|         |       |                |       |              | KSTSGEGFQFGKKDPNFKGFSGAGEKLFSSQCGKMANKANTSGDFEKDDDDACKTEDSDDI |



|          |       |                |        |              |
|----------|-------|----------------|--------|--------------|
| 01:9606  | 87808 | 0#NP_001019628 | RGPD1  | Homo_sapiens |
| 01:9606  | 87808 | 0#NP_001032955 | RGPD6  | Homo_sapiens |
| 01:9606  | 87808 | 0#NP_001071638 | RGPD2  | Homo_sapiens |
| 01:9606  | 87808 | 0#NP_001116835 | RGPD6  | Homo_sapiens |
| 01:9606  | 87808 | 0#NP_001137485 | RGPD3  | Homo_sapiens |
| 01:9606  | 87808 | 0#NP_001157935 | RGPD8  | Homo_sapiens |
| 01:9606  | 87808 | 0#NP_005045    | RGPD5  | Homo_sapiens |
| 01:9606  | 87808 | 0#NP_115636    | RGPD5  | Homo_sapiens |
| 01:9606  | 87808 | 0#NP_872394    | RGPD4  | Homo_sapiens |
| 01:9606  | 87808 | NM_001024457   | RGPD1  | Homo_sapiens |
| 01:9606  | 87808 | NM_001037866   | RGPD6  | Homo_sapiens |
| 01:9606  | 87808 | NM_001078170   | RGPD2  | Homo_sapiens |
| 01:9606  | 87808 | NM_001123363   | RGPD6  | Homo_sapiens |
| 01:9606  | 87808 | NM_001144013   | RGPD3  | Homo_sapiens |
| 01:9606  | 87808 | NM_001164463   | RGPD8  | Homo_sapiens |
| 01:9606  | 87808 | NM_005054      | RGPD5  | Homo_sapiens |
| 01:9606  | 87808 | NM_032260      | RGPD5  | Homo_sapiens |
| 01:9606  | 87808 | NM_182588      | RGPD4  | Homo_sapiens |
| 04:9913  | 87808 | NM_174592      | RANBP2 | Bos_taurus   |
| 07:10090 | 87808 | NM_0011240     | Ranbp2 | Mus_musculus |

[illegible]

01:9606|87808|0#NP\_001019628|RGPD1|Homo\_sapiens  
01:9606|87808|0#NP\_001032955|RGPD6|Homo\_sapiens  
01:9606|87808|0#NP\_001071638|RGPD2|Homo\_sapiens  
01:9606|87808|0#NP\_001116835|RGPD6|Homo\_sapiens  
01:9606|87808|0#NP\_001137485|RGPD3|Homo\_sapiens  
01:9606|87808|0#NP\_001157935|RGPD8|Homo\_sapiens  
01:9606|87808|0#NP\_005045|RGPD5|Homo\_sapiens  
01:9606|87808|0#NP\_115636|RGPD5|Homo\_sapiens  
01:9606|87808|0#NP\_872394|RGPD4|Homo\_sapiens  
01:9606|87808|NM\_001024457|RGPD1|Homo\_sapiens  
01:9606|87808|NM\_001037866|RGPD6|Homo\_sapiens  
01:9606|87808|NM\_001078170|RGPD2|Homo\_sapiens  
01:9606|87808|NM\_001123363|RGPD6|Homo\_sapiens  
01:9606|87808|NM\_001144013|RGPD3|Homo\_sapiens  
01:9606|87808|NM\_001164463|RGPD8|Homo\_sapiens  
01:9606|87808|NM\_005054|RGPD5|Homo\_sapiens  
01:9606|87808|NM\_032260|RGPD5|Homo\_sapiens  
01:9606|87808|NM\_182588|RGPD4|Homo\_sapiens  
04:9913|87808|NM\_174592|RANBP2|Bos\_taurus  
07:10090|87808|NM\_011240|Ranbp2|Mus\_musculus

01:9606|87808|0#NP\_001019628|RGPD1|Homo\_sapiens  
01:9606|87808|0#NP\_001032955|RGPD6|Homo\_sapiens  
01:9606|87808|0#NP\_001071638|RGPD2|Homo\_sapiens  
01:9606|87808|0#NP\_001116835|RGPD6|Homo\_sapiens  
01:9606|87808|0#NP\_001137485|RGPD3|Homo\_sapiens  
01:9606|87808|0#NP\_001157935|RGPD8|Homo\_sapiens  
01:9606|87808|0#NP\_005045|RGPD5|Homo\_sapiens  
01:9606|87808|0#NP\_115636|RGPD5|Homo\_sapiens  
01:9606|87808|0#NP\_872394|RGPD4|Homo\_sapiens  
01:9606|87808|NM\_001024457|RGPD1|Homo\_sapiens  
01:9606|87808|NM\_001037866|RGPD6|Homo\_sapiens  
01:9606|87808|NM\_001078170|RGPD2|Homo\_sapiens  
01:9606|87808|NM\_001123363|RGPD6|Homo\_sapiens  
01:9606|87808|NM\_001144013|RGPD3|Homo\_sapiens  
01:9606|87808|NM\_001164463|RGPD8|Homo\_sapiens  
01:9606|87808|NM\_005054|RGPD5|Homo\_sapiens  
01:9606|87808|NM\_032260|RGPD5|Homo\_sapiens  
01:9606|87808|NM\_182588|RGPD4|Homo\_sapiens  
04:9913|87808|NM\_174592|RANBP2|Bos\_taurus  
07:10090|87808|NM\_011240|Ranbp2|Mus\_musculus

01:9606|87808|0#NP\_001019628|RGPD1|Homo\_sapiens  
01:9606|87808|0#NP\_001032955|RGPD6|Homo\_sapiens  
01:9606|87808|0#NP\_001071638|RGPD2|Homo\_sapiens  
01:9606|87808|0#NP\_001116835|RGPD6|Homo\_sapiens  
01:9606|87808|0#NP\_001137485|RGPD3|Homo\_sapiens  
01:9606|87808|0#NP\_001157935|RGPD8|Homo\_sapiens  
01:9606|87808|0#NP\_005045|RGPD5|Homo\_sapiens  
01:9606|87808|0#NP\_115636|RGPD5|Homo\_sapiens  
01:9606|87808|0#NP\_872394|RGPD4|Homo\_sapiens  
01:9606|87808|NM\_001024457|RGPD1|Homo\_sapiens  
01:9606|87808|NM\_001037866|RGPD6|Homo\_sapiens  
01:9606|87808|NM\_001078170|RGPD2|Homo\_sapiens  
01:9606|87808|NM\_001123363|RGPD6|Homo\_sapiens  
01:9606|87808|NM\_001144013|RGPD3|Homo\_sapiens  
01:9606|87808|NM\_001164463|RGPD8|Homo\_sapiens  
01:9606|87808|NM\_005054|RGPD5|Homo\_sapiens  
01:9606|87808|NM\_032260|RGPD5|Homo\_sapiens  
01:9606|87808|NM\_182588|RGPD4|Homo\_sapiens  
04:9913|87808|NM\_174592|RANBP2|Bos\_taurus  
07:10090|87808|NM\_011240|Ranbp2|Mus\_musculus

01:9606|87808|0#NP\_001019628|RGPD1|Homo\_sapiens  
01:9606|87808|0#NP\_001032955|RGPD6|Homo\_sapiens  
01:9606|87808|0#NP\_001071638|RGPD2|Homo\_sapiens  
01:9606|87808|0#NP\_001116835|RGPD6|Homo\_sapiens  
01:9606|87808|0#NP\_001137485|RGPD3|Homo\_sapiens  
01:9606|87808|0#NP\_001157935|RGPD8|Homo\_sapiens  
01:9606|87808|0#NP\_005045|RGPD5|Homo\_sapiens  
01:9606|87808|0#NP\_115636|RGPD5|Homo\_sapiens  
01:9606|87808|0#NP\_872394|RGPD4|Homo\_sapiens  
01:9606|87808|NM\_001024457|RGPD1|Homo\_sapiens  
01:9606|87808|NM\_001037866|RGPD6|Homo\_sapiens  
01:9606|87808|NM\_001078170|RGPD2|Homo\_sapiens  
01:9606|87808|NM\_001123363|RGPD6|Homo\_sapiens  
01:9606|87808|NM\_001144013|RGPD3|Homo\_sapiens  
01:9606|87808|NM\_001164463|RGPD8|Homo\_sapiens  
01:9606|87808|NM\_005054|RGPD5|Homo\_sapiens  
01:9606|87808|NM\_032260|RGPD5|Homo\_sapiens  
01:9606|87808|NM\_182588|RGPD4|Homo\_sapiens  
04:9913|87808|NM\_174592|RANBP2|Bos\_taurus

FKKIFDEAKTAQEKDSLITPHVSRSTPRESPCGKI AVAVLEETTTRERTDVIQGGDVADA  
-----  
FKKIFDEAKTAQEKDSLITPHVSRSTPRESPCGKI AVAVLEETTTRERTDVIQGGDVADA  
FKKIFDEAKTAQEKDSLITPHVSRSTPRESPCGKI AVAVLEETTTRERTDVIQGGDVADA  
FKKIFDEAKTAQEKDSLITPHVSRSTPRESPCGKI AVAVLEETTTRERTDVIQGGDVADA  
FKKIFDEAKTAQEKDSLITPHVSRSTPRESPCGKI AVAVLEETTTRERTDVIQGGDVADA  
-----  
FKKIFDEAKTAQEKDSLITPHVSRSTPRESPCGKI AVAVLEETTTRERTDVIQGGDVADA  
FKKIFDEAKTAQEKDSLITPHVSRSTPRESPCGKI AVAVLEETTTRERTDVIQGGDVADA  
-----  
FKKIFDEAKTAQEKDSLITPHVSRSTPRESPCGKI AVAVLEETTTRERTDVIQGGDVADA  
FKKIFDEAKTAQEKDSLITPHVSRSTPRESPCGKI AVAVLEETTTRERTDVIQGGDVADA  
FKKIFDEAKTAQEKDSLITPHVSRSTPRESPCGKI AVAVLEETTTRERTDVIQGGDVADA  
FKKIFDEAKTAQEKDSLITPHVSRSTPRESPCGKI AVAVLEETTTRERTDVIQGGDVADA  
FKKIFDEAKTAQEKDSLITPHVSRSTPRESPCGKI AVAVLEETTTRERTDVIQGGDVADA  
-----  
FKKIFDEAKTAQEKDSLITPHVSRSTPRESPCGKI AVAVLEETTTRERTDVIQGGDVADA  
FKKIFDEAKVAQETDFLITPHVARSATPRESPCGKMAVAVLEETTTRERTDLSQGGDAADT  
FKKIFDEAKTAQEKDSLITPHVSHLSTPRESPCGKI AIAVLEETTTRERTDLTQGDEVIDT

ASEV-EVSSTSETTTKAVVSPPKFVFGSESVKRIF SSEKSNPFAFGNSSATGSLFGFSFN  
-----  
ASEV-EVSSTSETTTKAVVSPPKFVFGSESVKRIF SSEKSNPFAFGNSSATGSLFGFSFN  
ASEV-EVSSTSETTTKAVVSPPKFVFGSESVKRIF SSEKSNPFAFGNSSATGSLFGFSFN  
ASEV-EVSSTSETTTKAVVSPPKFVFGSESVKRIF SSEKSNPFAFGNSSATGSLFGFSFN  
ASEV-EVSSTSETTTKAVVSPPKFVFGSESVKRIF SSEKSNPFAFGNSSATGSLFGFSFN  
ASEV-EVSSTSETTTKAVVSPPKFVFGSESVKRIF SSEKSNPFAFGNSSATGSLFGFSFN  
-----  
ASEV-EVSSTSETTTKAVVSPPKFVFGSESVKRIF SSEKSNPFAFGNSSATGSLFGFSFN  
ASEV-EVSSTSETTTKAVVSPPKFVFGSESVKRIF SSEKSNPFAFGNSSATGSLFGFSFN  
-----  
ASEV-EVSSTSETTTKAVVSPPKFVFGSESVKRIF SSEKSNPFAFGNSSATGSLFGFSFN  
TSEVGGVSGTPEPTTKAVVSPPKFVFGSESVKSI FSSEKSKPPAFGNSSTTGSLFGFSFN  
TSEAGETSTSETTPKAVVSPPKFVFGSESVKSI FSSEKSKPPAFGNSSATGSLFGFSFN

APLKSNDSETSSVAQSGSESKVEPKKCELSKNSD IEQSSDSKVKNLSASFPMEESSINYT  
-----  
APLKSNDSETSSVAQSGSESKVEPKKCELSKNSD IEQSSDSKVKNLSASFPMEESSINYT  
APLKSNNSETSSVAQSGSESKVEPKKCELSKNSD IEQSSDSKVKNLSASFPTTEESSINYT  
APLKSNNSETSSVAQSGSESKVEPKKCELSKNSD IEQSSDSKVKNLSASFPTTEESSINYT  
APLKSNNSETSSVAQSGSESKVEPKKCELSKNSD IEQSSDSKVKNLSASFPTTEESSINYT  
APLKSNNSETSSVAQSGSESKVEPKKCELSKNSD IEQSSDSKVKNLSASFPTTEESSINYT  
-----  
ASLKSNNSETSSVAQSGSESKVEPKKCELSKNSD IEQSSDSKVKNLSASFPMEESSINYT  
APLKSNDSETSSVAQSGSESKVEPKKCELSKNSD IEQSSDSKVKNLSASFPMEESSINYT  
-----  
APLKSNDSETSSVAQSGSESKVEPKKCELSKNSD IEQSSDSKVKNLSASFPMEESSINYT  
APLKSNNSETSSVAQSGSESKVEPKKCELSKNSD IEQSSDSKVKNLSASFPTTEESSINYT  
APLKSNNSETSSVAQSGSESKVEPKKCELSKNSD IEQSSDSKVKNLSASFPTTEESSINYT  
APLKSNNSETSSVAQSGSESKVEPKKCELSKNSD IEQSSDSKVKNLSASFPTTEESSINYT  
APLKSNNSETSSVAQSGSESKVEPKKCELSKNSD IEQSSDSKVKNLSASFPTTEESSINYT  
-----  
ASLKSNNSETSSVAQSGSESKVEPKKCELSKNSD IEQSSDSKVKNLSASFPMEESSINYT  
TPLKNNSEASSAAQSGSERKVEPGGRQESQNSDLKSASDGKVNTSPAFLKEQFSTSH  
APLKSNSSEMTSRVQSGSEGVKPKDKCELPQNSDIKQSSDGKVKNLSA-FSKENSSTSYT

FKTPEKEPPLWHAFTKE--E--LVQKLSSTTKSA-----DQLNGLLRET  
-----  
FKTPEKEPPLWHAFTKE--E--LVQKLSSTTKSA-----DQLNGLLRET  
FKTPEKEPPLWHAFTKE--E--LVQKLRSTTKSA-----DHLNGLLREI  
FKTPEKEPPLWYAEFTKE--E--LVQKLSSTTKSA-----DHLNGLLREI  
FKTPEKEPPLWHAFTKE--E--LVQKLRSTTKSA-----DHLNGLLREI  
FKTPEKEPPLWHAFTKE--E--LVQKLRSTTKSA-----DHLNGLLREI  
-----  
FKTPEKEPPLWHAFTKE--E--LVQKLSSTTKSA-----DHLNGLLREA  
FKTPEKEPPLWHAFTKE--E--LVQKLSSTTKSA-----DQLNGLLRET  
-----  
FKTPEKEPPLWHAFTKE--E--LVQKLSSTTKSA-----DQLNGLLRET  
FKTPEKEPPLWHAFTKE--E--LVQKLRSTTKSA-----DHLNGLLREI  
FKTPEKEPPLWYAEFTKE--E--LVQKLSSTTKSA-----DHLNGLLREI  
FKTPEKEPPLWHAFTKE--E--LVQKLRSTTKSA-----DHLNGLLREI  
FKTPEKEPPLWHAFTKE--E--LVQKLRSTTKSA-----DHLNGLLREI  
-----  
FKTPEKEPPLWHAFTKE--E--LVQKLSSTTKSA-----DHLNGLLREA  
FKTPEKVEERKKPEDLPDDDLVIVELYLTPTPEQRALASRLQLPPTFFCYKNRPDISEE

FKTPEKAQEKS KPEDLPSDNDILIVYELTPTPEQKALAEKLLLPSTFFCYKNRPGYVSEE

EATSAVLMEQIKLLKSE-----IRRL--ERNQE--ESAAVEHLKNVLLQFIFLKPGE  
EATSAVLMEQIKLLKSE-----IRRL--ERNQE--ESAAVEHLKNVLLQFIFLKPGE  
EATNAVLMEQIKLLKSE-----IRRL--ERNQEREKSAANLEYLKNVLLQFIFLKPGE  
EATNAVLMEQIKLLKSE-----IRRL--ERNQEVEVSAANVEHLKNVLLQFIFLKPGE  
EATNAVLMEQIKLLKSE-----IRRL--ERNQEREKSAANLEYLKNVLLQFIFLKPGE  
EATNAVLMEQIKLLKSE-----IRRL--ERNQEREKSAANLEYLKNVLLQFIFLKPGE  
EATSAVLMEQIKLLKSE-----IRRL--ERNQEVEESAANVEHLKNVLLQFIFLKPGE  
EATSAVLMEQIKLLKSE-----IRRL--ERNQE--ESAAVEHLKNVLLQFIFLKPGE  
EATSAVLMEQIKLLKSE-----IRRL--ERNQE--ESAAVEHLKNVLLQFIFLKPGE  
EATNAVLMEQIKLLKSE-----IRRL--ERNQEREKSAANLEYLKNVLLQFIFLKPGE  
EATNAVLMEQIKLLKSE-----IRRL--ERNQEVEVSAANVEHLKNVLLQFIFLKPGE  
EATNAVLMEQIKLLKSE-----IRRL--ERNQEREKSAANLEYLKNVLLQFIFLKPGE  
EATNAVLMEQIKLLKSE-----IRRL--ERNQEREKSAANLEYLKNVLLQFIFLKPGE  
EATSAVLMEQIKLLKSE-----IRRL--ERNQEVEESAANVEHLKNVLLQFIFLKPGE  
EEDDEDFDTAVKKNGLKLYLDDSECTRLSEENVTD-----NEKCVIUV-EKKPTVE  
EEDDEYEMAVKKNGLKLYLDDSEKPL--EENLADND-----KECVIUV-EKKPTVE

```

RE-----SLLPVINTML-QLSPEEKGKLAAVAQGLQ-----ETSIPKKK-----
RE-----SLLPVINTML-QLSPEEKGKLAAVAQGLQ-----ETSIPKKK-----
RE-----RLLPVINTML-QLSPEEKGKLAAVAQDEE-----ENASRSSG-----
RE-----RLLPVINTML-QLSLEEKGKLAAVAQGEE-----ENASRSSG-----
RE-----RLLPVINTML-QLSPEEKGKLAAVAQDEE-----ENPSRSSG-----
RE-----RLLPVINTML-QLSPEEKGKLAAVAQDEE-----ENASRSSG-----
RE-----RLLPVINTML-QLSPEEKGKLAAVAQGEE-----ENASRSSG-----
RE-----SLLPVINTML-QLSPEEKGKLAAVAQGLQ-----ETSIPKKK-----
RE-----SLLPVINTML-QLSPEEKGKLAAVAQGLQ-----ETSIPKKK-----
RE-----RLLPVINTML-QLSPEEKGKLAAVAQDEE-----ENASRSSG-----
RE-----RLLPVINTML-QLSLEEKGKLAAVAQGEE-----ENASRSSG-----
RE-----RLLPVINTML-QLSPEEKGKLAAVAQDEE-----ENPSRSSG-----
RE-----RLLPVINTML-QLSPEEKGKLAAVAQDEE-----ENASRSSG-----
RE-----RLLPVINTML-QLSPEEKGKLAAVAQGLQ-----ETSIPKKK-----
EKAKADTLKLPTTFFCGICSDTDEDNGNAEDFQSELQVKVQEAQKSQDENIASSADGMCTD
ERAKADTLKLPTTFFCGVCSDDTDENGNEDFQSELRKVCEAQKSQNEKVTDRVGI EHTG

```

DTKVTVVPFLCKSEEPFTTKSVSSSPSVSSGTVDKPVDLSTRKENDADSTSQVESKTVTFG  
ETEVTNPVGCKSEEPDSDTKHSSS-SPVSGTMDKPVDLSTRKETDMEFPPSKGENKPVLF

[illegible]

|          |       |                |        |              |                                                               |
|----------|-------|----------------|--------|--------------|---------------------------------------------------------------|
| 01:9606  | 87808 | NM_182588      | RGPD4  | Homo_sapiens | -----                                                         |
| 04:9913  | 87808 | NM_174592      | RANBP2 | Bos_taurus   | FGSGPGLSFADLASSNSGDFAFGSKDKNFQWANTGAAVFGAQSTSKVGEDEDGSDEEVVH  |
| 07:10090 | 87808 | NM_011240      | Ranbp2 | Mus_musculus | FGSGTGLSFADLASSNSGDFAFGSKDKNFQWANTGAAVFGTQTTSKGGEDEDGSDEDVVH  |
| 01:9606  | 87808 | 0#NP_001019628 | RGPD1  | Homo_sapiens | -----                                                         |
| 01:9606  | 87808 | 0#NP_001032955 | RGPD6  | Homo_sapiens | -----                                                         |
| 01:9606  | 87808 | 0#NP_001071638 | RGPD2  | Homo_sapiens | -----                                                         |
| 01:9606  | 87808 | 0#NP_001116835 | RGPD6  | Homo_sapiens | -----                                                         |
| 01:9606  | 87808 | 0#NP_001137485 | RGPD3  | Homo_sapiens | -----                                                         |
| 01:9606  | 87808 | 0#NP_001157935 | RGPD8  | Homo_sapiens | -----                                                         |
| 01:9606  | 87808 | 0#NP_005045    | RGPD5  | Homo_sapiens | -----                                                         |
| 01:9606  | 87808 | 0#NP_115636    | RGPD5  | Homo_sapiens | -----                                                         |
| 01:9606  | 87808 | 0#NP_872394    | RGPD4  | Homo_sapiens | -----                                                         |
| 01:9606  | 87808 | NM_001024457   | RGPD1  | Homo_sapiens | -----                                                         |
| 01:9606  | 87808 | NM_001037866   | RGPD6  | Homo_sapiens | -----                                                         |
| 01:9606  | 87808 | NM_001078170   | RGPD2  | Homo_sapiens | -----                                                         |
| 01:9606  | 87808 | NM_001123363   | RGPD6  | Homo_sapiens | -----                                                         |
| 01:9606  | 87808 | NM_001144013   | RGPD3  | Homo_sapiens | -----                                                         |
| 01:9606  | 87808 | NM_001164463   | RGPD8  | Homo_sapiens | -----                                                         |
| 01:9606  | 87808 | NM_005054      | RGPD5  | Homo_sapiens | -----                                                         |
| 01:9606  | 87808 | NM_032260      | RGPD5  | Homo_sapiens | -----                                                         |
| 01:9606  | 87808 | NM_182588      | RGPD4  | Homo_sapiens | -----                                                         |
| 04:9913  | 87808 | NM_174592      | RANBP2 | Bos_taurus   | NEDIHFEPIVSLPEVEVKSGEEDDEILFKERAKLYRWDRASQWKERGVGDIKILWHTVK   |
| 07:10090 | 87808 | NM_011240      | Ranbp2 | Mus_musculus | NEDIHFEPIVSLPEVEVKSGEEDDEVLFKERAKLYRWDRDVSQWKERGIGDIKILWHTMK  |
| 01:9606  | 87808 | 0#NP_001019628 | RGPD1  | Homo_sapiens | -----                                                         |
| 01:9606  | 87808 | 0#NP_001032955 | RGPD6  | Homo_sapiens | -----                                                         |
| 01:9606  | 87808 | 0#NP_001071638 | RGPD2  | Homo_sapiens | -----                                                         |
| 01:9606  | 87808 | 0#NP_001116835 | RGPD6  | Homo_sapiens | -----                                                         |
| 01:9606  | 87808 | 0#NP_001137485 | RGPD3  | Homo_sapiens | -----                                                         |
| 01:9606  | 87808 | 0#NP_001157935 | RGPD8  | Homo_sapiens | -----                                                         |
| 01:9606  | 87808 | 0#NP_005045    | RGPD5  | Homo_sapiens | -----                                                         |
| 01:9606  | 87808 | 0#NP_115636    | RGPD5  | Homo_sapiens | -----                                                         |
| 01:9606  | 87808 | 0#NP_872394    | RGPD4  | Homo_sapiens | -----                                                         |
| 01:9606  | 87808 | NM_001024457   | RGPD1  | Homo_sapiens | -----                                                         |
| 01:9606  | 87808 | NM_001037866   | RGPD6  | Homo_sapiens | -----                                                         |
| 01:9606  | 87808 | NM_001078170   | RGPD2  | Homo_sapiens | -----                                                         |
| 01:9606  | 87808 | NM_001123363   | RGPD6  | Homo_sapiens | -----                                                         |
| 01:9606  | 87808 | NM_001144013   | RGPD3  | Homo_sapiens | -----                                                         |
| 01:9606  | 87808 | NM_001164463   | RGPD8  | Homo_sapiens | -----                                                         |
| 01:9606  | 87808 | NM_005054      | RGPD5  | Homo_sapiens | -----                                                         |
| 01:9606  | 87808 | NM_032260      | RGPD5  | Homo_sapiens | -----                                                         |
| 01:9606  | 87808 | NM_182588      | RGPD4  | Homo_sapiens | -----                                                         |
| 04:9913  | 87808 | NM_174592      | RANBP2 | Bos_taurus   | NYFRILMRRDQVFKVCANHVITKTMELKPLNVSNNALVWVTASDYADGEAKVEQLAVRFKT |
| 07:10090 | 87808 | NM_011240      | Ranbp2 | Mus_musculus | KYYRILMRRDQVFKVCANHVITKAMELKPLNVSNNALVWVTASDYADGEAKVEQLAVRFKT |
| 01:9606  | 87808 | 0#NP_001019628 | RGPD1  | Homo_sapiens | -----                                                         |
| 01:9606  | 87808 | 0#NP_001032955 | RGPD6  | Homo_sapiens | -----                                                         |
| 01:9606  | 87808 | 0#NP_001071638 | RGPD2  | Homo_sapiens | -----                                                         |
| 01:9606  | 87808 | 0#NP_001116835 | RGPD6  | Homo_sapiens | -----                                                         |
| 01:9606  | 87808 | 0#NP_001137485 | RGPD3  | Homo_sapiens | -----                                                         |
| 01:9606  | 87808 | 0#NP_001157935 | RGPD8  | Homo_sapiens | -----                                                         |
| 01:9606  | 87808 | 0#NP_005045    | RGPD5  | Homo_sapiens | -----                                                         |
| 01:9606  | 87808 | 0#NP_115636    | RGPD5  | Homo_sapiens | -----                                                         |
| 01:9606  | 87808 | 0#NP_872394    | RGPD4  | Homo_sapiens | -----                                                         |
| 01:9606  | 87808 | NM_001024457   | RGPD1  | Homo_sapiens | -----                                                         |
| 01:9606  | 87808 | NM_001037866   | RGPD6  | Homo_sapiens | -----                                                         |
| 01:9606  | 87808 | NM_001078170   | RGPD2  | Homo_sapiens | -----                                                         |
| 01:9606  | 87808 | NM_001123363   | RGPD6  | Homo_sapiens | -----                                                         |
| 01:9606  | 87808 | NM_001144013   | RGPD3  | Homo_sapiens | -----                                                         |
| 01:9606  | 87808 | NM_001164463   | RGPD8  | Homo_sapiens | -----                                                         |
| 01:9606  | 87808 | NM_005054      | RGPD5  | Homo_sapiens | -----                                                         |
| 01:9606  | 87808 | NM_032260      | RGPD5  | Homo_sapiens | -----                                                         |
| 01:9606  | 87808 | NM_182588      | RGPD4  | Homo_sapiens | -----                                                         |
| 04:9913  | 87808 | NM_174592      | RANBP2 | Bos_taurus   | KEMADCFKKKFEECQQNLLKPQKGQDSLTAEFSSKETNPVVFFDICADDEPLGRITMELFS |
| 07:10090 | 87808 | NM_011240      | Ranbp2 | Mus_musculus | KEMTESFKKKFEECQQNI1IKLQNGHTSLAAELSKDTPNPVFFDVCADGEPLGRIIMELFS |
| 01:9606  | 87808 | 0#NP_001019628 | RGPD1  | Homo_sapiens | -----                                                         |
| 01:9606  | 87808 | 0#NP_001032955 | RGPD6  | Homo_sapiens | -----                                                         |
| 01:9606  | 87808 | 0#NP_001071638 | RGPD2  | Homo_sapiens | -----                                                         |
| 01:9606  | 87808 | 0#NP_001116835 | RGPD6  | Homo_sapiens | -----                                                         |
| 01:9606  | 87808 | 0#NP_001137485 | RGPD3  | Homo_sapiens | -----                                                         |
| 01:9606  | 87808 | 0#NP_001157935 | RGPD8  | Homo_sapiens | -----                                                         |
| 01:9606  | 87808 | 0#NP_005045    | RGPD5  | Homo_sapiens | -----                                                         |
| 01:9606  | 87808 | 0#NP_115636    | RGPD5  | Homo_sapiens | -----                                                         |
| 01:9606  | 87808 | 0#NP_872394    | RGPD4  | Homo_sapiens | -----                                                         |
| 01:9606  | 87808 | NM_001024457   | RGPD1  | Homo_sapiens | -----                                                         |
| 01:9606  | 87808 | NM_001037866   | RGPD6  | Homo_sapiens | -----                                                         |
| 01:9606  | 87808 | NM_001078170   | RGPD2  | Homo_sapiens | -----                                                         |
| 01:9606  | 87808 | NM_001123363   | RGPD6  | Homo_sapiens | -----                                                         |
| 01:9606  | 87808 | NM_001144013   | RGPD3  | Homo_sapiens | -----                                                         |
| 01:9606  | 87808 | NM_001164463   | RGPD8  | Homo_sapiens | -----                                                         |

|          |       |           |        |              |                                                              |
|----------|-------|-----------|--------|--------------|--------------------------------------------------------------|
| 01:9606  | 87808 | NM_005054 | RGPD5  | Homo_sapiens | -----                                                        |
| 01:9606  | 87808 | NM_032260 | RGPD5  | Homo_sapiens | -----                                                        |
| 01:9606  | 87808 | NM_182588 | RGPD4  | Homo_sapiens | -----                                                        |
| 04:9913  | 87808 | NM_174592 | RANBP2 | Bos_taurus   | NIVPKTAENFRALCTGEKGFGFKSSIFHRVIPDFVCQGGDITKHDGTGGRSIYGDKFEDE |
| 07:10090 | 87808 | NM_011240 | Ranbp2 | Mus_musculus | NIVPQTAENFRALCTGEKGFGFKNSIFHRVVPDFICQGGDITKYNGTGGQSIYGDKFDDE |

|          |       |                |        |              |                                                              |
|----------|-------|----------------|--------|--------------|--------------------------------------------------------------|
| 01:9606  | 87808 | 0#NP_001019628 | RGPD1  | Homo_sapiens | -----                                                        |
| 01:9606  | 87808 | 0#NP_001032955 | RGPD6  | Homo_sapiens | -----                                                        |
| 01:9606  | 87808 | 0#NP_001071638 | RGPD2  | Homo_sapiens | -----                                                        |
| 01:9606  | 87808 | 0#NP_001116835 | RGPD6  | Homo_sapiens | -----                                                        |
| 01:9606  | 87808 | 0#NP_001137485 | RGPD3  | Homo_sapiens | -----                                                        |
| 01:9606  | 87808 | 0#NP_001157935 | RGPD8  | Homo_sapiens | -----                                                        |
| 01:9606  | 87808 | 0#NP_005045    | RGPD5  | Homo_sapiens | -----                                                        |
| 01:9606  | 87808 | 0#NP_115636    | RGPD5  | Homo_sapiens | -----                                                        |
| 01:9606  | 87808 | 0#NP_872394    | RGPD4  | Homo_sapiens | -----                                                        |
| 01:9606  | 87808 | NM_001024457   | RGPD1  | Homo_sapiens | -----                                                        |
| 01:9606  | 87808 | NM_001037866   | RGPD6  | Homo_sapiens | -----                                                        |
| 01:9606  | 87808 | NM_001078170   | RGPD2  | Homo_sapiens | -----                                                        |
| 01:9606  | 87808 | NM_001123363   | RGPD6  | Homo_sapiens | -----                                                        |
| 01:9606  | 87808 | NM_001144013   | RGPD3  | Homo_sapiens | -----                                                        |
| 01:9606  | 87808 | NM_001164463   | RGPD8  | Homo_sapiens | -----                                                        |
| 01:9606  | 87808 | NM_005054      | RGPD5  | Homo_sapiens | -----                                                        |
| 01:9606  | 87808 | NM_032260      | RGPD5  | Homo_sapiens | -----                                                        |
| 01:9606  | 87808 | NM_182588      | RGPD4  | Homo_sapiens | -----                                                        |
| 04:9913  | 87808 | NM_174592      | RANBP2 | Bos_taurus   | NFDVKHTGPGLLSMANRGQDTNNSQFFITLKKAERLDFKHVVFGFVKDGMDTVKKIESFG |
| 07:10090 | 87808 | NM_011240      | Ranbp2 | Mus_musculus | NFDLKHTGPGLLSMANYGQNTNSSQFFITLKKAEHLDFKHVVFGFVKDGMDTVKKIESFG |

|          |       |                |        |              |                    |
|----------|-------|----------------|--------|--------------|--------------------|
| 01:9606  | 87808 | 0#NP_001019628 | RGPD1  | Homo_sapiens | -----              |
| 01:9606  | 87808 | 0#NP_001032955 | RGPD6  | Homo_sapiens | -----              |
| 01:9606  | 87808 | 0#NP_001071638 | RGPD2  | Homo_sapiens | -----              |
| 01:9606  | 87808 | 0#NP_001116835 | RGPD6  | Homo_sapiens | -----              |
| 01:9606  | 87808 | 0#NP_001137485 | RGPD3  | Homo_sapiens | -----              |
| 01:9606  | 87808 | 0#NP_001157935 | RGPD8  | Homo_sapiens | -----              |
| 01:9606  | 87808 | 0#NP_005045    | RGPD5  | Homo_sapiens | -----              |
| 01:9606  | 87808 | 0#NP_115636    | RGPD5  | Homo_sapiens | -----              |
| 01:9606  | 87808 | 0#NP_872394    | RGPD4  | Homo_sapiens | -----              |
| 01:9606  | 87808 | NM_001024457   | RGPD1  | Homo_sapiens | -----              |
| 01:9606  | 87808 | NM_001037866   | RGPD6  | Homo_sapiens | -----              |
| 01:9606  | 87808 | NM_001078170   | RGPD2  | Homo_sapiens | -----              |
| 01:9606  | 87808 | NM_001123363   | RGPD6  | Homo_sapiens | -----              |
| 01:9606  | 87808 | NM_001144013   | RGPD3  | Homo_sapiens | -----              |
| 01:9606  | 87808 | NM_001164463   | RGPD8  | Homo_sapiens | -----              |
| 01:9606  | 87808 | NM_005054      | RGPD5  | Homo_sapiens | -----              |
| 01:9606  | 87808 | NM_032260      | RGPD5  | Homo_sapiens | -----              |
| 01:9606  | 87808 | NM_182588      | RGPD4  | Homo_sapiens | -----              |
| 04:9913  | 87808 | NM_174592      | RANBP2 | Bos_taurus   | SPKGSVSRRIIITECGQI |
| 07:10090 | 87808 | NM_011240      | Ranbp2 | Mus_musculus | SPKGSVSRRICITECGQL |

***YBX1***

Ac-SSPTAAAGLVITPR

CLUSTAL O(1.2.1) multiple sequence alignment

|                                                    |                                                                |
|----------------------------------------------------|----------------------------------------------------------------|
| 00:1 Ac-SSPTAAAGLVTITPR                            | -----SSPTAAAGLVTITPR-----                                      |
| 01:9606 88707 0#NP_004550 YBX1 Homo_sapiens        | -----MSS                                                       |
| 01:9606 88707 NM_004559 YBX1 Homo_sapiens          | GLIPVPVPPFSLVRSVAGAESGPQRALSSPTAAAGLVTITPREEPQLPQPAPVTITATMSS  |
| 04:9913 88707 NM_174815 YBX1 Bos_taurus            | -----VRSVAGAESGPQRALSSPTAAAGLVTITPREEPQLPQPAPVTITATMSS         |
| 06:10116 88707 NM_031563 Ybx1 Rattus_norvegicus    | -----EPHRRRRRPSHHHTREEEPQSPPPAPVTITATMSS                       |
| 07:10090 88707 NM_011732 Ybx1 Mus_musculus         | -----EPHRRRRRPSHHHTREEEPQSPPPAPVTITATMSS                       |
| 09:8364 88707 NM_001016677 ybx1 Xenopus_tropicalis | -----SEPTA-----GPSHHLRKQPTYTIKDTMSS                            |
| 10:7955 88707 NM_001126457 ybx1 Danio_rerio        | -----HRENTLESHRRLYQQENNMSS                                     |
| 10:7955 88707 NM_131620 ybx1 Danio_rerio           | -----HRENTLESHRRLYQQENNMSS                                     |
| 00:1 Ac-SSPTAAAGLVTITPR                            | -----                                                          |
| 01:9606 88707 0#NP_004550 YBX1 Homo_sapiens        | EAETQQPPAAPPAAPALSAADTKPGTTGSGAGSGGPGGLTSAAPAGGDKKVIATKVLGTV   |
| 01:9606 88707 NM_004559 YBX1 Homo_sapiens          | EAETQQPPAAPPAAPALSAADTKPGTTGSGAGSGGPGGLTSAAPAGGDKKVIATKVLGTV   |
| 04:9913 88707 NM_174815 YBX1 Bos_taurus            | EAETQQPPAAPPAAPALSAADTKPGTTGSGAGSGGPGGLTSAAPAGGDKKVIATKVLGTV   |
| 06:10116 88707 NM_031563 Ybx1 Rattus_norvegicus    | EAETQQPPAAPAA--ALSAADTKPGSTGSGAGSGGPGGLTSAAPAGGDKKVIATKVLGTV   |
| 07:10090 88707 NM_011732 Ybx1 Mus_musculus         | EAETQQPPAAPAA--ALSAADTKPGSTGSGAGSGGPGGLTSAAPAGGDKKVIATKVLGTV   |
| 09:8364 88707 NM_001016677 ybx1 Xenopus_tropicalis | EVETQQQQTVTA-----LEGKAGQ-EPAATVGEKKVIATKVLGTV                  |
| 10:7955 88707 NM_001126457 ybx1 Danio_rerio        | EAETQQPPQPAADAE-----SPSSPAAAAATAGDKKVIATKVLGTV                 |
| 10:7955 88707 NM_131620 ybx1 Danio_rerio           | EAETQQPPQPAADAE-----SPSSPAAAAATAGDKKVIATKVLGTV                 |
| 00:1 Ac-SSPTAAAGLVTITPR                            | -----                                                          |
| 01:9606 88707 0#NP_004550 YBX1 Homo_sapiens        | KWFNVNRNGYGFINRNDTKEDVFVHQTAIKKNNPRKYLRVSGDGETVEFDVVEGEKGAEAA  |
| 01:9606 88707 NM_004559 YBX1 Homo_sapiens          | KWFNVNRNGYGFINRNDTKEDVFVHQTAIKKNNPRKYLRVSGDGETVEFDVVEGEKGAEAA  |
| 04:9913 88707 NM_174815 YBX1 Bos_taurus            | KWFNVNRNGYGFINRNDTKEDVFVHQTAIKKNNPRKYLRVSGDGETVEFDVVEGEKGAEAA  |
| 06:10116 88707 NM_031563 Ybx1 Rattus_norvegicus    | KWFNVNRNGYGFINRNDTKEDVFVHQTAIKKNNPRKYLRVSGDGETVEFDVVEGEKGAEAA  |
| 07:10090 88707 NM_011732 Ybx1 Mus_musculus         | KWFNVNRNGYGFINRNDTKEDVFVHQTAIKKNNPRKYLRVSGDGETVEFDVVEGEKGAEAA  |
| 09:8364 88707 NM_001016677 ybx1 Xenopus_tropicalis | KWFNVNRNGYGFINRNDTKEDVFVHQTAIKKNNPRKYLRVSGDGETVEFDVVEGEKGAEAA  |
| 10:7955 88707 NM_001126457 ybx1 Danio_rerio        | KWFNVNRNGYGFINRNDTKEDVFVHQTAIKKNNPRKYLRVSGDGETVEFDVVEGEKGAEAA  |
| 10:7955 88707 NM_131620 ybx1 Danio_rerio           | KWFNVNRNGYGFINRNDTKEDVFVHQTAIKKNNPRKYLRVSGDGETVEFDVVEGEKGAEAA  |
| 00:1 Ac-SSPTAAAGLVTITPR                            | -----                                                          |
| 01:9606 88707 0#NP_004550 YBX1 Homo_sapiens        | NVTGPGGVPVQGSKYAADRNHYRRYPRRRGPPRNYQQNYQNSE---SGEKNEGSESAPEG   |
| 01:9606 88707 NM_004559 YBX1 Homo_sapiens          | NVTGPGGVPVQGSKYAADRNHYRRYPRRRGPPRNYQQNYQNSE---SGEKNEGSESAPEG   |
| 04:9913 88707 NM_174815 YBX1 Bos_taurus            | NVTGPGGVPVQGSKYAADRNHYRRYPRRRGPPRNYQQNYQNSE---SGEKNEGSESAPEG   |
| 06:10116 88707 NM_031563 Ybx1 Rattus_norvegicus    | NVTGPGGVPVQGSKYAADRNHYRRYPRRRGPPRNYQQNYQNSE---SGEKNEGSESAPEG   |
| 07:10090 88707 NM_011732 Ybx1 Mus_musculus         | NVTGPGGVPVQGSKYAADRNHYRRYPRRRGPPRNYQQNYQNSE---SGEKNEGSESAPEG   |
| 09:8364 88707 NM_001016677 ybx1 Xenopus_tropicalis | NVTGPGGVPVQGSKYAADRNHFRRYQRRRGPPRNYQQNYQNNE---SGEKTENESAPEG    |
| 10:7955 88707 NM_001126457 ybx1 Danio_rerio        | NVTGPGGVPVQGSKYAADRNRYRRYPRRRAPPRDYQENYQSDPEAPEPREKREGAESAPEG  |
| 10:7955 88707 NM_131620 ybx1 Danio_rerio           | NVTGPGGVPVQGSKYAADRNRYRRYPRRRAPPRDYQENYQSDPEAPEPREKREGAESAPEG  |
| 00:1 Ac-SSPTAAAGLVTITPR                            | -----                                                          |
| 01:9606 88707 0#NP_004550 YBX1 Homo_sapiens        | Q--AQQRRPY--RRRRFPPPYMRRPYGRRPQYSNPPVQGEVMEGADNQG---AGEQGRP    |
| 01:9606 88707 NM_004559 YBX1 Homo_sapiens          | Q--AQQRRPY--RRRRFPPPYMRRPYGRRPQYSNPPVQGEVMEGADNQG---AGEQGRP    |
| 04:9913 88707 NM_174815 YBX1 Bos_taurus            | Q--AQQRRPY--RRRRFPPPYMRRPYGRRPQYSNPPVQGEVMEGADNQG---AGEQGRP    |
| 06:10116 88707 NM_031563 Ybx1 Rattus_norvegicus    | Q--AQQRRPY--RRRRFPPPYMRRPYARRPQYSNPPVQGEVMEGADNQG---AGEQGRP    |
| 07:10090 88707 NM_011732 Ybx1 Mus_musculus         | Q--AQQRRPY--RRRRFPPPYMRRPYARRPQYSNPPVQGEVMEGADNQG---AGEQGRP    |
| 09:8364 88707 NM_001016677 ybx1 Xenopus_tropicalis | EGGSNQQRPY--RRRRVPPYYLRRPYGRRPQYSNAPIQGEAGESDGGQSS--QGDQGRP    |
| 10:7955 88707 NM_001126457 ybx1 Danio_rerio        | EMQQQQRRPTYPGRRRYPYPYFVRRRYGRRPPYTNSQR-GEMTEGGEGEENQGGPDQGNKP  |
| 10:7955 88707 NM_131620 ybx1 Danio_rerio           | EMQQQQRRPTYPGRRRYPYPYFVRRRYGRRPPYTNSQR-GEMTEGGEGEENQGGPDQGNKP  |
| 00:1 Ac-SSPTAAAGLVTITPR                            | -----                                                          |
| 01:9606 88707 0#NP_004550 YBX1 Homo_sapiens        | VRQNMRYGYRPRFRRGPPRQRQRPREDGNEEDKENQGDETQGGQPPQRRYRRNFNYRRRRP  |
| 01:9606 88707 NM_004559 YBX1 Homo_sapiens          | VRQNMRYGYRPRFRRGPPRQRQRPREDGNEEDKENQGDETQGGQPPQRRYRRNFNYRRRRP  |
| 04:9913 88707 NM_174815 YBX1 Bos_taurus            | VRQNMRYGYRPRFRRGPPRQRQRPREDGNEEDKENQGDETQGGQPPQRRYRRNFNYRRRRP  |
| 06:10116 88707 NM_031563 Ybx1 Rattus_norvegicus    | VRQNMRYGYRPRFRRGPPRQRQRPREDGNEEDKENQGDETQGGQPPQRRYRRNFNYRRRRP  |
| 07:10090 88707 NM_011732 Ybx1 Mus_musculus         | VRQNMRYGYRPRFRRGPPRQRQRPREDGNEEDKENQGDETQGGQPPQRRYRRNFNYRRRRP  |
| 09:8364 88707 NM_001016677 ybx1 Xenopus_tropicalis | VRQNMRYGFRPRFRRGPPRQRQPREEGNEEDKENQGDETQSQQAPQRRYRRNFNYRRRRP   |
| 10:7955 88707 NM_001126457 ybx1 Danio_rerio        | MRQNYRGRFRP---RGPSRPRPVR--DGEEDKENQSESQGNQEPQRQRRYRRNFNYRRRRP  |
| 10:7955 88707 NM_131620 ybx1 Danio_rerio           | MRQNYRGRFRPS---RGPPRPRPVR--DGEEDKENQSESQGNQEPQRQRRYRRNFNYRRRRP |
| 00:1 Ac-SSPTAAAGLVTITPR                            | -----                                                          |
| 01:9606 88707 0#NP_004550 YBX1 Homo_sapiens        | ENPKPQDGKETKAADPPAENS SAPEAEQGGAE                              |
| 01:9606 88707 NM_004559 YBX1 Homo_sapiens          | ENPKPQDGKETKAADPPAENS SAPEAEQGGAE                              |
| 04:9913 88707 NM_174815 YBX1 Bos_taurus            | ENPKPQDGKETKAADPPAENS SAPEAEQGGAE                              |
| 06:10116 88707 NM_031563 Ybx1 Rattus_norvegicus    | ENPKPQDGKETKAADPPAENS SAPEAEQGGAE                              |
| 07:10090 88707 NM_011732 Ybx1 Mus_musculus         | ENPKPQDGKETKAADPPAENS SAPEAEQGGAE                              |
| 09:8364 88707 NM_001016677 ybx1 Xenopus_tropicalis | ENPKPQDGKETKAAETSAENTS APEAEQGGAE                              |
| 10:7955 88707 NM_001126457 ybx1 Danio_rerio        | QTTKPQDGKDSKAADASADKSAPEAEQGGAD                                |
| 10:7955 88707 NM_131620 ybx1 Danio_rerio           | QTTKPQDGKDSKAADASADKSAPEAEQGGAD                                |

# *USP33*

Ac-AGPAGQAVEVLPHFESLGKQEKIPNKMSAFR

CLUSTAL O(1.2.1) multiple sequence alignment

|                                                    |                                                                    |
|----------------------------------------------------|--------------------------------------------------------------------|
| 00:1 Ac-AGPAGQAVEVLPHFESLGKQEKIPNKMSAFR            | -----AGPAGQAVEVLPHFESLGKQEKIPNKMSAFR-----                          |
| 01:9606 8996 0#NP_055832 USP33 Homo_sapiens        | -----M-TGSNSHITILTLKVLPHFESLGKQEKIPNKMSAFRNHCPHLDVSGEITKEDLIQ      |
| 01:9606 8996 0#NP_963918 USP33 Homo_sapiens        | -----M-TGSNSHITILTLKVLPHFESLGKQEKIPNKMSAFRNHCPHLDVSGEITKEDLIQ      |
| 01:9606 8996 0#NP_963920 USP33 Homo_sapiens        | -----M-TGSNSHITILTLKVLPHFESLGKQEKIPNKMSAFRNHCPHLDVSGEITKEDLIQ      |
| 01:9606 8996 NM_015017 USP33 Homo_sapiens          | ANIVM-TGSNSHITILTLKVLPHFESLGKQEKIPNKMSAFRNHCPHLDVSGEITKEDLIQ       |
| 01:9606 8996 NM_201624 USP33 Homo_sapiens          | CGCRPLLVELAGPAGQAVEVLPHFESLGKQEKIPNKMSAFRNHCPHLDVSGEITKEDLIQ       |
| 01:9606 8996 NM_201626 USP33 Homo_sapiens          | ANIVM-TGSNSHITILTLKVLPHFESLGKQEKIPNKMSAFRNHCPHLDVSGEITKEDLIQ       |
| 04:9913 8996 NM_001101139 USP33 Bos_taurus         | ----P-LAALAGPVGKALEVLPHLESLEKQENISNKMSSFRSHCPHLDVSGEITKEDLIQ       |
| 06:10116 8996 NM_001017379 Usp33 Rattus_norvegicus | -----MTTFRNHCPHLDVSGEITKEDLIQ                                      |
| 06:10116 8996 NM_001191094 Usp33 Rattus_norvegicus | CGSER-SGSEEEECAGRRAEVLPDLKSLEKEKENCKKMTTFRNHCPHLDVSGEITKEDLIQ      |
| 07:10090 8996 NM_001076676 Usp33 Mus_musculus      | CGSER-SGSEEEECAGRRAEVLPDLKSLEKEKENCKKMTTFRNHCPHLDVSGEITKEDLIQ      |
| 07:10090 8996 NM_001252486 Usp33 Mus_musculus      | CGSER-SGSEEEECAGRRAEVLPDLKSLEKEKENCKKMTTFRNHCPHLDVSGEITKEDLIQ      |
| 07:10090 8996 NM_133247 Usp33 Mus_musculus         | CGSER-SGSEEEECAGRRAEVLPDLKSLEKEKENCKKMTTFRNHCPHLDVSGEITKEDLIQ      |
| 09:8364 8996 NM_001016228 usp33 Xenopus_tropicalis | -----SKMSSSLVCDCHLESVSGEVTKEELIK                                   |
| 10:7955 8996 NM_213227 usp33 Danio_rerio           | -----RRAMSGVSSNDCPHLECVGEITKEELIQ                                  |
| 00:1 Ac-AGPAGQAVEVLPHFESLGKQEKIPNKMSAFR            | -----KSLGTCQDCKVQGPNLWACLLENRCSYVGCESQVDHSTIHSQETKHYLTVNLTTLRVWCY  |
| 01:9606 8996 0#NP_055832 USP33 Homo_sapiens        | KSLGTCQDCKVQGPNLWACLLENRCSYVGCESQVDHSTIHSQETKHYLTVNLTTLRVWCY       |
| 01:9606 8996 0#NP_963918 USP33 Homo_sapiens        | KSLGTCQDCKVQGPNLWACLLENRCSYVGCESQVDHSTIHSQETKHYLTVNLTTLRVWCY       |
| 01:9606 8996 0#NP_963920 USP33 Homo_sapiens        | KSLGTCQDCKVQGPNLWACLLENRCSYVGCESQVDHSTIHSQETKHYLTVNLTTLRVWCY       |
| 01:9606 8996 NM_015017 USP33 Homo_sapiens          | KSLGTCQDCKVQGPNLWACLLENRCSYVGCESQVDHSTIHSQETKHYLTVNLTTLRVWCY       |
| 01:9606 8996 NM_201624 USP33 Homo_sapiens          | KSLGTCQDCKVQGPNLWACLLENRCSYVGCESQVDHSTIHSQETKHYLTVNLTTLRVWCY       |
| 01:9606 8996 NM_201626 USP33 Homo_sapiens          | KSLGTCQDCKVQGPNLWACLLENRCSYVGCESQVDHSTIHSQETKHYLTVNLTTLRVWCY       |
| 04:9913 8996 NM_001101139 USP33 Bos_taurus         | KSHGSCQDCKVRGPNLWACLLENRCSYVGCESQVDHSTIHSQETKHYLTVNLTTLRVWCY       |
| 06:10116 8996 NM_001017379 Usp33 Rattus_norvegicus | -----KSHGACQDCKVRGPNLWACLLENRCSYVGCESQ-DHSTIHSKSKTKHYLTVNLTTLRVWCY |
| 06:10116 8996 NM_001191094 Usp33 Rattus_norvegicus | KSLGACQDCKVRGPNLWACLLENRCSYVGCESQVDHSTIHSQETKHYLTVNLTTLRVWCY       |
| 07:10090 8996 NM_001076676 Usp33 Mus_musculus      | KSLGACQDCKVRGPNLWACLLENRCSYVGCESQVDHSTIHSQETKHYLTVNLTTLRVWCY       |
| 07:10090 8996 NM_001252486 Usp33 Mus_musculus      | KSLGACQDCKVRGPNLWACLLENRCSYVGCESQVDHSTIHSQETKHYLTVNLTTLRVWCY       |
| 07:10090 8996 NM_133247 Usp33 Mus_musculus         | KSLGACQDCKVRGPNLWACLLENRCSYVGCESQVDHSTIHSQETKHYLTVNLTTLRVWCY       |
| 09:8364 8996 NM_001016228 usp33 Xenopus_tropicalis | KSHGSCQDCRVRGPNLWACLLENGCSYVGCESHVDHSTLHSDQTKHCLTVNLTTLRVWCY       |
| 10:7955 8996 NM_213227 usp33 Danio_rerio           | KSHGQCQDCKVGGPNLWACLLENGCSYVGCESHADHSTVHSQETRHNLTVNLTTLRVWCY       |
| 00:1 Ac-AGPAGQAVEVLPHFESLGKQEKIPNKMSAFR            | -----ACSKEVFLDRKLGTPPSLPHVRQPHQIQENSVQDFKIPS-NTTLKTPLVAVFDDDLIEAD  |
| 01:9606 8996 0#NP_055832 USP33 Homo_sapiens        | ACSKEVFLDRKLGTPPSLPHVRQPHQIQENSVQDFKIPS-NTTLKTPLVAVFDDDLIEAD       |
| 01:9606 8996 0#NP_963918 USP33 Homo_sapiens        | ACSKEVFLDRKLGTPPSLPHVRQPHQIQENSVQDFKIPS-NTTLKTPLVAVFDDDLIEAD       |
| 01:9606 8996 0#NP_963920 USP33 Homo_sapiens        | ACSKEVFLDRKLGTPPSLPHVRQPHQIQENSVQDFKIPS-NTTLKTPLVAVFDDDLIEAD       |
| 01:9606 8996 NM_015017 USP33 Homo_sapiens          | ACSKEVFLDRKLGTPPSLPHVRQPHQIQENSVQDFKIPS-NTTLKTPLVAVFDDDLIEAD       |
| 01:9606 8996 NM_201624 USP33 Homo_sapiens          | ACSKEVFLDRKLGTPPSLPHVRQPHQIQENSVQDFKIPS-NTTLKTPLVAVFDDDLIEAD       |
| 01:9606 8996 NM_201626 USP33 Homo_sapiens          | ACSKEVFLDRKLGTPPSLPHVRQPHQIQENSVQDFKIPS-NTTLKTPLVAVFDDDLIEAD       |
| 04:9913 8996 NM_001101139 USP33 Bos_taurus         | ACSKEVFLDRKLGTPPSLPHVRQPQQTQENSVQDFKIPS-NTALKTPLVAVFEDDLIEVE       |
| 06:10116 8996 NM_001017379 Usp33 Rattus_norvegicus | ACSKEVFLDRKLGTPPSLPHVRQPQQTQENSVQDFKIPS-NTALKTPLVAVFEDDLIEVE       |
| 06:10116 8996 NM_001191094 Usp33 Rattus_norvegicus | ACSKEVFLDRKLGTPPSLPHVRQPQQTQENSVQDFKIPS-NTALKTPMVAVSEDLDIEVE       |
| 07:10090 8996 NM_001076676 Usp33 Mus_musculus      | ACSKEVFLDRKLGTPPSLPHVRQPQQTQENSVQDFKIPS-NTALKTPMVAVSEDLDIEVE       |
| 07:10090 8996 NM_001252486 Usp33 Mus_musculus      | ACSKEVFLDRKLGTPPSLPHVRQPQQTQENSVQDFKIPS-NTALKTPMVAVSEDLDIEVE       |
| 07:10090 8996 NM_133247 Usp33 Mus_musculus         | ACSKEVFLDRKLGTPPSLPHVRQPQQTQENSVQDFKIPS-NTALKTPMVAVSEDLDIEVE       |
| 09:8364 8996 NM_001016228 usp33 Xenopus_tropicalis | TCSKEVFLDRKLSTQPTSAKLQD-----SHTQESKMSS-SLTLKIPAAVVSENLDIELE        |
| 10:7955 8996 NM_213227 usp33 Danio_rerio           | ACTKEVFLERELGPHKQLPNAAKAVSPVQTPCQDLNTPGSPTSLRVPVSAGTCDLDMETE       |
| 00:1 Ac-AGPAGQAVEVLPHFESLGKQEKIPNKMSAFR            | -----EEDELKARGLTGLKKNIGNTCYMNAALQALSNCPPLTQFFLDCGGLARTDKKPAICKSYLK |
| 01:9606 8996 0#NP_055832 USP33 Homo_sapiens        | EEDELKARGLTGLKKNIGNTCYMNAALQALSNCPPLTQFFLDCGGLARTDKKPAICKSYLK      |
| 01:9606 8996 0#NP_963918 USP33 Homo_sapiens        | EEDELKARGLTGLKKNIGNTCYMNAALQALSNCPPLTQFFLDCGGLARTDKKPAICKSYLK      |
| 01:9606 8996 0#NP_963920 USP33 Homo_sapiens        | EEDELKARGLTGLKKNIGNTCYMNAALQALSNCPPLTQFFLDCGGLARTDKKPAICKSYLK      |
| 01:9606 8996 NM_015017 USP33 Homo_sapiens          | EEDELKARGLTGLKKNIGNTCYMNAALQALSNCPPLTQFFLDCGGLARTDKKPAICKSYLK      |
| 01:9606 8996 NM_201624 USP33 Homo_sapiens          | EEDELKARGLTGLKKNIGNTCYMNAALQALSNCPPLTQFFLDCGGLARTDKKPAICKSYLK      |
| 01:9606 8996 NM_201626 USP33 Homo_sapiens          | EEDELKARGLTGLKKNIGNTCYMNAALQALSNCPPLTQFFLDCGGLARTDKKPAICKSYLK      |
| 04:9913 8996 NM_001101139 USP33 Bos_taurus         | EEDELKARGLTGLKKNIGNTCYMNAALQALSNCPPLTQFFLDCGGLARTDKKPAICKSYLK      |
| 06:10116 8996 NM_001017379 Usp33 Rattus_norvegicus | -----EEDELKARGLTGLKKNIGNTCYMNAALQALSNCPPLTQFFLDCGGLARTDKKPAICKSYLK |
| 06:10116 8996 NM_001191094 Usp33 Rattus_norvegicus | EEDELKARGLTGLKKNIGNTCYMNAALQALSNCPPLTQFFLDCGGLARTDKKPAICKSYLK      |
| 07:10090 8996 NM_001076676 Usp33 Mus_musculus      | EEDELKARGLTGLKKNIGNTCYMNAALQALSNCPPLTQFFLDCGGLARTDKKPAICKSYLK      |
| 07:10090 8996 NM_001252486 Usp33 Mus_musculus      | EEDELKARGLTGLKKNIGNTCYMNAALQALSNCPPLTQFFLDCGGLARTDKKPAICKSYLK      |
| 07:10090 8996 NM_133247 Usp33 Mus_musculus         | EEDELKARGLTGLKKNIGNTCYMNAALQALSNCPPLTQFFLDCGGLARTDKKPAICKSYLK      |
| 09:8364 8996 NM_001016228 usp33 Xenopus_tropicalis | EEDELKTRGLTGLKKNIGNTCYMNAALQALSNCPPLTQFFLDCGGLARTDKKPAICKSYLK      |
| 10:7955 8996 NM_213227 usp33 Danio_rerio           | EEDELKTRGLTGLKKNIGNTCYMNAALQALSNCPPLTQFFLDCGGLARTDKKPAICKSYLK      |

00:1|Ac-AGPAGQAVEVLPHFESLGKQEKIPNKMSAFR  
01:9606|8996|0#NP\_055832|USP33|Homo\_sapiens  
01:9606|8996|0#NP\_963918|USP33|Homo\_sapiens  
01:9606|8996|0#NP\_963920|USP33|Homo\_sapiens  
01:9606|8996|NM\_015017|USP33|Homo\_sapiens  
01:9606|8996|NM\_201624|USP33|Homo\_sapiens  
01:9606|8996|NM\_201626|USP33|Homo\_sapiens  
04:9913|8996|NM\_001101139|USP33|Bos\_taurus  
06:10116|8996|NM\_001017379|Usp33|Rattus\_norvegicus  
06:10116|8996|NM\_001191094|Usp33|Rattus\_norvegicus  
07:10090|8996|NM\_001076676|Usp33|Mus\_musculus  
07:10090|8996|NM\_001252486|Usp33|Mus\_musculus  
07:10090|8996|NM\_133247|Usp33|Mus\_musculus  
09:8364|8996|NM\_001016228|usp33|Xenopus\_tropicalis  
10:7955|8996|NM\_213227|usp33|Danio\_rerio

00:1|Ac-AGPAGQAVEVLPHFESLGKQEKIPNKMSAFR  
01:9606|8996|0#NP\_055832|USP33|Homo\_sapiens  
01:9606|8996|0#NP\_963918|USP33|Homo\_sapiens  
01:9606|8996|0#NP\_963920|USP33|Homo\_sapiens  
01:9606|8996|NM\_015017|USP33|Homo\_sapiens  
01:9606|8996|NM\_201624|USP33|Homo\_sapiens  
01:9606|8996|NM\_201626|USP33|Homo\_sapiens  
04:9913|8996|NM\_001101139|USP33|Bos\_taurus  
06:10116|8996|NM\_001017379|Usp33|Rattus\_norvegicus  
06:10116|8996|NM\_001191094|Usp33|Rattus\_norvegicus  
07:10090|8996|NM\_001076676|Usp33|Mus\_musculus  
07:10090|8996|NM\_001252486|Usp33|Mus\_musculus  
07:10090|8996|NM\_133247|Usp33|Mus\_musculus  
09:8364|8996|NM\_001016228|usp33|Xenopus\_tropicalis  
10:7955|8996|NM\_213227|usp33|Danio\_rerio

00:1|Ac-AGPAGQAVEVLPHFESLGKQEKIPNKMSAFR  
01:9606|8996|0#NP\_055832|USP33|Homo\_sapiens  
01:9606|8996|0#NP\_963918|USP33|Homo\_sapiens  
01:9606|8996|0#NP\_963920|USP33|Homo\_sapiens  
01:9606|8996|NM\_015017|USP33|Homo\_sapiens  
01:9606|8996|NM\_201624|USP33|Homo\_sapiens  
01:9606|8996|NM\_201626|USP33|Homo\_sapiens  
04:9913|8996|NM\_001101139|USP33|Bos\_taurus  
06:10116|8996|NM\_001017379|Usp33|Rattus\_norvegicus  
06:10116|8996|NM\_001191094|Usp33|Rattus\_norvegicus  
07:10090|8996|NM\_001076676|Usp33|Mus\_musculus  
07:10090|8996|NM\_001252486|Usp33|Mus\_musculus  
07:10090|8996|NM\_133247|Usp33|Mus\_musculus  
09:8364|8996|NM\_001016228|usp33|Xenopus\_tropicalis  
10:7955|8996|NM\_213227|usp33|Danio\_rerio

00:1|Ac-AGPAGQAVEVLPHFESLGKQEKIPNKMSAFR  
01:9606|8996|0#NP\_055832|USP33|Homo\_sapiens  
01:9606|8996|0#NP\_963918|USP33|Homo\_sapiens  
01:9606|8996|0#NP\_963920|USP33|Homo\_sapiens  
01:9606|8996|NM\_015017|USP33|Homo\_sapiens  
01:9606|8996|NM\_201624|USP33|Homo\_sapiens  
01:9606|8996|NM\_201626|USP33|Homo\_sapiens  
04:9913|8996|NM\_001101139|USP33|Bos\_taurus  
06:10116|8996|NM\_001017379|Usp33|Rattus\_norvegicus  
06:10116|8996|NM\_001191094|Usp33|Rattus\_norvegicus  
07:10090|8996|NM\_001076676|Usp33|Mus\_musculus  
07:10090|8996|NM\_001252486|Usp33|Mus\_musculus  
07:10090|8996|NM\_133247|Usp33|Mus\_musculus  
09:8364|8996|NM\_001016228|usp33|Xenopus\_tropicalis  
10:7955|8996|NM\_213227|usp33|Danio\_rerio

00:1|Ac-AGPAGQAVEVLPHFESLGKQEKIPNKMSAFR  
01:9606|8996|0#NP\_055832|USP33|Homo\_sapiens  
01:9606|8996|0#NP\_963918|USP33|Homo\_sapiens  
01:9606|8996|0#NP\_963920|USP33|Homo\_sapiens  
01:9606|8996|NM\_015017|USP33|Homo\_sapiens  
01:9606|8996|NM\_201624|USP33|Homo\_sapiens  
01:9606|8996|NM\_201626|USP33|Homo\_sapiens  
04:9913|8996|NM\_001101139|USP33|Bos\_taurus  
06:10116|8996|NM\_001017379|Usp33|Rattus\_norvegicus  
06:10116|8996|NM\_001191094|Usp33|Rattus\_norvegicus  
07:10090|8996|NM\_001076676|Usp33|Mus\_musculus  
07:10090|8996|NM\_001252486|Usp33|Mus\_musculus  
07:10090|8996|NM\_133247|Usp33|Mus\_musculus  
09:8364|8996|NM\_001016228|usp33|Xenopus\_tropicalis  
10:7955|8996|NM\_213227|usp33|Danio\_rerio

-----  
LMTLWHKSRPGSVVPTTLFQGIKTVNPTFRGYSQQDAQEFRLRCLMDLLHEELKEQVMEV  
LMTLWHKSRPGSVVPTTLFQGIKTVNPTFRGYSQQDAQEFRLRCLMDLLHEELKEQVMEV  
LMTLWHKSRPGSVVPTTLFQGIKTVNPTFRGYSQQDAQEFRLRCLMDLLHEELKEQVMEV  
LMTLWHKSRPGSVVPTTLFQGIKTVNPTFRGYSQQDAQEFRLRCLMDLLHEELKEQVMEV  
LMTLWHKSRPGSVVPTTLFQGIKTVNPTFRGYSQQDAQEFRLRCLMDLLHEELKEQVMEV  
LMTLWHKSRPGSVVPTTLFQGIKTVNPTFRGYSQQDAQEFRLRCLMDLLHEELKEQVMEV  
LMTLWHKSRPGSVVPTTLFQGIKTVNPTFRGYSQQDAQEFRLRCLMDLLHEELKEQVMEV  
-----

LMTLWHKSRPGSVVPANLFGGIKTVNPTFRGYSQQDAQEFRLRCLMDLLHEELKEQVMEI  
LMTLWHKSRPGSVVPANLFGGIKTVNPTFRGYSQQDAQEFRLRCLMDLLHEELKEQVMEM  
LMTLWHKSRPGSVVPANLFGGIKTVNPTFRGYSQQDAQEFRLRCLMDLLHEELKEQVMEM  
LMSDIWHKNRPGFVIPTNLFGGIKSVNPTFRGYSQQDAQEFRLRCLMDVLHEELKEQIVEV  
LVTDLWHKNRNSVPTNLFGGIKAVNPMFRGYSQQDSQEFRLRCLMDQLHEELKELIPEP

-----  
EEDPQTITTEETMEEDKQSQSDVDFQSCESCSCSNS-DRAENENGSRCFSEDNNETTMLIQDD  
EEDPQTITTEETMEEDKQSQSDVDFQSCESCSCSNS-DRAENENGSRCFSEDNNETTMLIQDD  
EEDPQTITTEETMEEDKQSQSDVDFQSCESCSCSNS-DRAENENGSRCFSEDNNETTMLIQDD  
EEDPQTITTEETMEEDKQSQSDVDFQSCESCSCSNS-DRAENENGSRCFSEDNNETTMLIQDD  
EEDPQTITTEETMEEDKQSQSDVDFQSCESCSCSNS-DRAENENGSRCFSEDNNETTMLIQDD  
EEDPQTITTEETMEEDKQSQSDVDFQSCESCSCSNS-DRAENENGSRCFSEDNNETTMLIQDD  
EEDPQTITTEETMEEDKQSQSDVDFQSCESCSCSNS-DRAENENGSRCFSEDNNETTMLIQDD  
-----

EEEPQALTSEETVEEEEKSQSDVDFQSCESCSCSSSEKGENESVSKGGPEDSTETTMLIQDE  
EEEPQTLTSEETVEEEEKSQSDVDFQSCESCSCSSS-EKAENESGSGKGFPEDSNETTMLIQDE  
EEEPQTLTSEETVEEEEKSQSDVDFQSCESCSCSSS-EKAENESGSGKGFPEDSNETTMLIQDE  
EEEPQTLTSEETVEEEEKSQSDVDFQSCESCSCSSS-EKAENESGSGKGFPEDSNETTMLIQDE  
EEDAQTGIVEENLDEDKQSDNDFHSCDSGSSSD---HAESERKLSEELTETMLIHED  
EDPNQAVAMDDSPDEDNHSQSDDFQSCESCSCSSSDRA---DNEGPRVPEDINEAEMLMPEQ

-----  
ENNSEMCKDWQKEK-CNKINKVNSEGEFDDKDRDSISETVDLNNQE-TVKVQIHSRASEY  
ENNSEMCKDWQKEK-CNKINKVNSEGEFDDKDRDSISETVDLNNQE-TVKVQIHSRASEY  
ENNSEMCKDWQKEK-CNKINKVNSEGEFDDKDRDSISETVDLNNQE-TVKVQIHSRASEY  
ENNSEMCKDWQKEK-CNKINKVNSEGEFDDKDRDSISETVDLNNQE-TVKVQIHSRASEY  
ENNSEMCKDWQKEK-CNKINKVNSEGEFDDKDRDSISETVDLNNQE-TVKVQIHSRASEY  
ENNSEMCKDWQKEK-CNKINKVNSEGEFDDKDRDSISETVDLNNQE-TVKVQIHSRASEY  
ENNSEMCKDWQKEK-CNKINKVNSEGEFDDKDRDSISETVDLNNQE-TVKVQIHSRASEY  
ENNSEMCKDWQKEK-CNKINKVHSEGEDDKDRDSVSETADLNNQE-TVKVQIHSRASEY  
-----

-EDLEMAKDWQKEK-CNKSNAKADSDGEPDKDRDTVCETVDLNSQE-TVKVQIHGRASEY  
-DDLEMAKDWQKEKV-CNKINKANADVELDKDRDTVCETVDLNSQE-TVKVQIHGRASES  
-DDLEMAKDWQKEKV-CNKINKANADVELDKDRDTVCETVDLNSQE-TVKVQIHGRASES  
-DDLEMAKDWQKEKV-CNKINKANADVELDKDRDTVCETVDLNSQE-TVKVQIHGRASES  
QKDVEICKTWQKEKKFSNNLNQNHFLQDFEKNIQSTIEESECLKQE-TVKVQIQSKAADF  
NQ---NNRDWQKEKNLNNLYRAGSGDLDKDVDTTSDSRFIISSQGAIKA---QGR--TS

-----  
ITDVHSNDLSTPQILPSNEGVPNRLSASPPKSGNLWPGLAPPHKKAQSA-SPKRKKQHKK  
ITDVHSNDLSTPQILPSNEGVPNRLSASPPKSGNLWPGLAPPHKKAQSA-SPKRKKQHKK  
ITDVHSNDLSTPQILPSNEGVPNRLSASPPKSGNLWPGLAPPHKKAQSA-SPKRKKQHKK  
ITDVHSNDLSTPQILPSNEGVPNRLSASPPKSGNLWPGLAPPHKKAQSA-SPKRKKQHKK  
ITDVHSNDLSTPQILPSNEGVPNRLSASPPKSGNLWPGLAPPHKKAQSA-SPKRKKQHKK  
ITDVHLNDLSTPQILPSNEGVPNRLSASPPKSGNLWPGLPPTHKVKQSALSPKRKKQHKK  
-----

ITDVHLNDLSTPQILPSNESVPNRLSASPPKSGNLWPGLTPPHKKAQSS-SPKRKKQHKK  
ITDVHLNDLSTPQILPSNESVSPRLSASPPKLGSLWPGLSPPHKKAQST-SAKRKKQHKK  
ITDVHLNDLSTPQILPSNESVSPRLSASPPKLGSLWPGLSPPHKKAQST-SAKRKKQHKK  
ITDVHLNDLSTPQILPSNESVSPRLSASPPKLGSLWPGLSPPHKKAQST-SAKRKKQHKK  
TAEVNMNDLPTSQTPLLNEGATTHLSSSPKPGAVWTGHKK----VPGLCPAKKRKQKK  
DSEIQVSSVTRPQSPGTGNEGITSRLSSSPPKS-SAWPNLSSSTHKKV-PMFTPTKTKRQRK

-----  
YRSVISDIFDGTIISSVQCLTCDRVSVTLETQDLSLPIPGKEDLAKLHSSSHPTSIVKA  
YRSVISDIFDGTIISSVQCLTCDRVSVTLETQDLSLPIPGKEDLAKLHSSSHPTSIVKA  
YRSVISDIFDGTIISSVQCLTCDRVSVTLETQDLSLPIPGKEDLAKLHSSSHPTSIVKA  
YRSVISDIFDGTIISSVQCLTCDRVSVTLETQDLSLPIPGKEDLAKLHSSSHPTSIVKA  
YRSVISDIFDGTIISSVQCLTCDRVSVTLETQDLSLPIPGKEDLAKLHSSSHPTSIVKA  
YRSVISDIFDGTIISSVQCLTCDRVSVTLETQDLSLPIPGKEDLAKLHSSSHPTSIVKA  
YRSVISDIFDGTIISSVQCLTCDRVSVTLETQDLSLPIPGKEDLAKLHSSSHPTSIVKA  
-----

YRSVISDIFDGTIISSVQCLTCDRVSVTLETQDLSLPIPGKEDLAKLHSSSHPT-IVKA  
YRSVISDIFDGTIVISSVQCLTCDRVSTITLETQDLSLPIPGKEDLAKLHSSSHPT-IVKA  
YRSVISDIFDGTIVISSVQCLTCDRVSTITLETQDLSLPIPGKEDLAKLHSSSHPT-IVKA  
YRSVISDIFDGTIVISSVQCLTCDRVSTITLETQDLSLPIPGKEDLAKLHSSSHPT-IVKA  
YHSVIADIFDGTIVISSVQCLTCDRVSVTLETQDLSLPIPGKEDLAKLHSSSHQSSLVKA  
YHSIISVFDDGTIVISSVQCLTCDRVSVTLENFQDISLPIPGKEDLAKLHSSSHQATLVKA



00:1|Ac-AGPAGQAVEVLPHFESLGKQEKIPNKMSAFR  
01:9606|8996|0#NP\_055832|USP33|Homo\_sapiens  
01:9606|8996|0#NP\_963918|USP33|Homo\_sapiens  
01:9606|8996|0#NP\_963920|USP33|Homo\_sapiens  
01:9606|8996|NM\_015017|USP33|Homo\_sapiens  
01:9606|8996|NM\_201624|USP33|Homo\_sapiens  
01:9606|8996|NM\_201626|USP33|Homo\_sapiens  
04:9913|8996|NM\_001101139|USP33|Bos\_taurus  
06:10116|8996|NM\_001017379|Usp33|Rattus\_norvegicus  
06:10116|8996|NM\_001191094|Usp33|Rattus\_norvegicus  
07:10090|8996|NM\_001076676|Usp33|Mus\_musculus  
07:10090|8996|NM\_001252486|Usp33|Mus\_musculus  
07:10090|8996|NM\_133247|Usp33|Mus\_musculus  
09:8364|8996|NM\_001016228|usp33|Xenopus\_tropicalis  
10:7955|8996|NM\_213227|usp33|Danio\_rerio

00:1|Ac-AGPAGQAVEVLPHFESLGKQEKIPNKMSAFR  
01:9606|8996|0#NP\_055832|USP33|Homo\_sapiens  
01:9606|8996|0#NP\_963918|USP33|Homo\_sapiens  
01:9606|8996|0#NP\_963920|USP33|Homo\_sapiens  
01:9606|8996|NM\_015017|USP33|Homo\_sapiens  
01:9606|8996|NM\_201624|USP33|Homo\_sapiens  
01:9606|8996|NM\_201626|USP33|Homo\_sapiens  
04:9913|8996|NM\_001101139|USP33|Bos\_taurus  
06:10116|8996|NM\_001017379|Usp33|Rattus\_norvegicus  
06:10116|8996|NM\_001191094|Usp33|Rattus\_norvegicus  
07:10090|8996|NM\_001076676|Usp33|Mus\_musculus  
07:10090|8996|NM\_001252486|Usp33|Mus\_musculus  
07:10090|8996|NM\_133247|Usp33|Mus\_musculus  
09:8364|8996|NM\_001016228|usp33|Xenopus\_tropicalis  
10:7955|8996|NM\_213227|usp33|Danio\_rerio

-----  
FIRLNRAFQKEDSPATFYCISMQWFREWESFVKGKGDPPGPIDNTKIAVTKCGNVMLRQ  
FIRLNRAFQKEDSPATFYCISMQWFREWESFVKGKGDPPGPIDNTKIAVTKCGNVMLRQ  
FIRVKK-----  
FIRLNRAFQKEDSPATFYCISMQWFREWESFVKGKGDPPGPIDNTKIAVTKCGNVMLRQ  
FIRLNRAFQKEDSPATFYCISMQWFREWESFVKGKGDPPGPIDNTKIAVTKCGNVMLRQ  
FIRVKK-----  
FIRLNRAFQEEDSPATFYCISMQWFREWESFVKGKGDPPGPIDNTKIAVTKCGNVILRQ  
---LNRAFQEEDSPATFYCISMQWFREWESFVKGKGDPPGPIDNTKIAVTKCGNVMLKQ  
FIRLNRAFQEEDSPATFYCISMQWFREWESFVK----DPPGPIDNTKIAVTKCGNVMLKQ  
FIRLNRAFQEEDSPATFYCISMQWFREWESFVK----DPPGPIDNTKIAVTKCGSVMLKQ  
FIRLNRAFQEEDSPATFYCISMQWFREWESFVKGKGDPPGPIDNTKIAVTKCGSVMLKQ  
FIRLNRAFQEEDSPATFYCISMQWFREWESFVKGKGDPPGPIDNTKIAVTKCGSVMLKQ  
FIRLNRAFQEEDSPATFYCISMQWFREWESFVKGKGDPPGPIDNTKIAVTKCGSVMLKQ  
FIRLNKAFQEEESPAVIYCISMQWFREWEGFVKSKSDPPGPIDNTKIAAAKCGHITLRQ  
FVRLNKAFQEEESPVVIYCISMQWFREWESFVKGKDIDPPGPIDNSKIAVKNKGHITLKP

-----  
GADSGQISEETWNFLQSIYGGGPEVILRPPVVHVDPDILQAEKIEVETRSL  
GADSGQISEETWNFLQSIYGGGPEVILRPPVVHVDPDILQAEKIEVETRSL  
-----  
GADSGQISEETWNFLQSIYGGGPEVILRPPVVHVDPDILQAEKIEVETRSL  
GADSGQISEETWNFLQSIYGGGPEVILRPPVVHVDPDILQAEKIEVETRSL  
-----  
GADSGQISEETWNFLQSIYGGGPEVILRPPVVHVDPDAVQAEKIEVETRSL  
GADSGQISEETWNFLQSIYGGGPEVILRPPVVHVDPDALQAEKIEVETRSL  
GADSGQISEETWNFLQSIYGGGPEVILRPPVVHVDPDALQAEKIEVETRSL  
GADSGQISEETWNFLQSIYGGGPEVILRPPVVHVDPDVLQAEKIEVETRSL  
GADSGQISEETWNFLQSIYGGGPEVILRPPVVHVDPDVLQAEKIEVETRSL  
GADSGQISEETWNFLQSIYGGGPEVILRPPVVHVDPDVLQAEKIEVETRSL  
GADSGQISEETWNFLQSIYGGGPEITLRQNVTLAESEGGHAEKIDVETRNI  
GADSGQISEETWNFLHNIHGGPVVTVRPSVSHQESETSQSEEKIEVETRIV

***RHOC***

Ac-GTSAGWSPTMAAIR

```

00:1|Ac-GTSAGWSPTMAAIR
01:9606|90945|0#NP_786886|RHOC|Homo_sapiens
01:9606|90945|NM_001042678|RHOC|Homo_sapiens
01:9606|90945|NM_001042679|RHOC|Homo_sapiens
01:9606|90945|NM_175744|RHOC|Homo_sapiens
04:9913|90945|NM_001046138|RHOC|Bos_taurus
06:10116|90945|NM_001106461|Rhoc|Rattus_norvegicus
07:10090|90945|NM_001291859|Rhoc|Mus_musculus
07:10090|90945|NM_007484|Rhoc|Mus_musculus
08:9031|90945|NM_001029849|RHOC|Gallus_gallus
09:8364|90945|NM_001016569|rhoc|Xenopus_tropicalis
10:7955|90945|NM_001002445|rhoad|Danio_rerio
10:7955|90945|NM_201150|rhoae|Danio_rerio
10:7955|90945|NM_213137|rhoaa|Danio_rerio
10:7955|90945|NM_213350|rhoac|Danio_rerio
12:7227|90945|NM_057750|Rho1|Drosophila_melanogaster
12:7227|90945|NM_134308|Rho1|Drosophila_melanogaster
12:7227|90945|NM_134309|Rho1|Drosophila_melanogaster
12:7227|90945|NM_166139|Rho1|Drosophila_melanogaster
12:7227|90945|NM_206127|Rho1|Drosophila_melanogaster
12:7227|90945|NM_206128|Rho1|Drosophila_melanogaster
13:6239|90945|NM_070558|rho-1|Caenorhabditis_elegans

```

IEGWAEESESTRVVLPPPLARLLRSPGISPWLSPTWRGGRPWPPVPGGL-----RRGPV  
-----GGGASWELVPRRALSLPRWPGDRGPC  
IEGWAEESESTRVVLPPPLARLLRSPGISPWLSPTWRGGRPWPPVPGGL-----RRGPV

|          |       |              |       |                         |
|----------|-------|--------------|-------|-------------------------|
| 01:9606  | 90945 | 0#NP_786886  | RHOC  | Homo_sapiens            |
| 01:9606  | 90945 | NM_001042678 | RHOC  | Homo_sapiens            |
| 01:9606  | 90945 | NM_001042679 | RHOC  | Homo_sapiens            |
| 01:9606  | 90945 | NM_175744    | RHOC  | Homo_sapiens            |
| 04:9913  | 90945 | NM_001046138 | RHOC  | Bos_taurus              |
| 06:10116 | 90945 | NM_001106461 | Rhoc  | Rattus_norvegicus       |
| 07:10090 | 90945 | NM_001291859 | Rhoc  | Mus_musculus            |
| 07:10090 | 90945 | NM_007484    | Rhoc  | Mus_musculus            |
| 08:9031  | 90945 | NM_001029849 | RHOC  | Gallus_gallus           |
| 09:8364  | 90945 | NM_001016569 | rhoc  | Xenopus_tropicalis      |
| 10:7955  | 90945 | NM_001002445 | rhoad | Danio_rerio             |
| 10:7955  | 90945 | NM_201150    | rhoae | Danio_rerio             |
| 10:7955  | 90945 | NM_213137    | rhoaa | Danio_rerio             |
| 10:7955  | 90945 | NM_213350    | rhoac | Danio_rerio             |
| 12:7227  | 90945 | NM_057750    | Rho1  | Drosophila_melanogaster |
| 12:7227  | 90945 | NM_134308    | Rho1  | Drosophila_melanogaster |
| 12:7227  | 90945 | NM_134309    | Rho1  | Drosophila_melanogaster |
| 12:7227  | 90945 | NM_166139    | Rho1  | Drosophila_melanogaster |
| 12:7227  | 90945 | NM_206127    | Rho1  | Drosophila_melanogaster |
| 12:7227  | 90945 | NM_206128    | Rho1  | Drosophila_melanogaster |
| 13:6239  | 90945 | NM_070558    | rho-1 | Caenorhabditis_elegans  |

```
-----
AAAL-----RGAGAGRAKGRPRPTLPLPGPPSPRRWRRRAGRGPVSLSLR
EEGLRPGRGPRS LQAESASGLGGGTASA-----PP---RAAARGPG-----
AAAL-----RGAGAGRAKGRPRPTLPLPGPPSPRRWRRRAGRGPVSLSLR
-----VSA
-----LQGEHTW-----ISLS
--V-----SASGTGRAAG-----GG-----
--V-----SASGTGR-----
-----
-----LGVV
-----
-----
SRIY-----KTERLTRIRNR--KL--YSD-----SESDSESSGIRCTCI
-----ER--TP
-----
```

|          |       |              |       |                         |
|----------|-------|--------------|-------|-------------------------|
| 01:9606  | 90945 | 0#NP_786886  | RHOC  | Homo_sapiens            |
| 01:9606  | 90945 | NM_001042678 | RHOC  | Homo_sapiens            |
| 01:9606  | 90945 | NM_001042679 | RHOC  | Homo_sapiens            |
| 01:9606  | 90945 | NM_175744    | RHOC  | Homo_sapiens            |
| 04:9913  | 90945 | NM_001046138 | RHOC  | Bos_taurus              |
| 06:10116 | 90945 | NM_001106461 | Rhoc  | Rattus_norvegicus       |
| 07:10090 | 90945 | NM_001291859 | Rhoc  | Mus_musculus            |
| 07:10090 | 90945 | NM_007484    | Rhoc  | Mus_musculus            |
| 08:9031  | 90945 | NM_001029849 | RHOC  | Gallus_gallus           |
| 09:8364  | 90945 | NM_001016569 | rhoc  | Xenopus_tropicalis      |
| 10:7955  | 90945 | NM_001002445 | rhoad | Danio_rerio             |
| 10:7955  | 90945 | NM_201150    | rhoae | Danio_rerio             |
| 10:7955  | 90945 | NM_213137    | rhoaa | Danio_rerio             |
| 10:7955  | 90945 | NM_213350    | rhoac | Danio_rerio             |
| 12:7227  | 90945 | NM_057750    | Rho1  | Drosophila_melanogaster |
| 12:7227  | 90945 | NM_134308    | Rho1  | Drosophila_melanogaster |
| 12:7227  | 90945 | NM_134309    | Rho1  | Drosophila_melanogaster |
| 12:7227  | 90945 | NM_166139    | Rho1  | Drosophila_melanogaster |
| 12:7227  | 90945 | NM_206127    | Rho1  | Drosophila_melanogaster |
| 12:7227  | 90945 | NM_206128    | Rho1  | Drosophila_melanogaster |
| 13:6239  | 90945 | NM_070558    | rho-1 | Caenorhabditis_elegans  |

```

-----GTSAGWSPTMAAIR-----
--MAAIRKKLVIVGDGACGKTCLLI
HRPRSWRRRSRG--SPTMAAIRKKLVIVGDGACGKTCLLI
--PAGRGSGLLSLDFISAPEPALSSCSLGTSA
GWSPTMAAIRKKLVIVGDGACGKTCLLI
HRPRSWRRRSRGSGLDFISAPEPALSSCSLGTSA
GWSPTMAAIRKKLVIVGDGACGKTCLLI
SRTRSAAGSGG--AEAMAAIRKKLVIVGDGACGKTCLLI
DSTQKQLFRAG--ISVMAAIRKKLVIVGDGACGKTCLLI
--GAQGTGAPA--VSAMAAIRKKLVIVGDGACGKTCLLI
--AAGGGGAQ--VSAMAAIRKKLVIVGDGACGKTCLLI
-----CCAVP--ERVMAAIRKKLVIVGDGACGKTCLLI
--AMAAIRKKLVIVGDGACGKTCLLI
--QVMAAIRKKLVIVGDGACGKTCLLI
-----EQ--TGAMAAIRKKLVIVGDGACGKTCLLI
QEKIKKARTSE--TKTMAAIRKKLVIVGDGACGKTCLLI
--RYFPAAQQ--KTTMAAIRKKLVIVGDGACGKTCLLI
--LPMTTIRKKLVIVGDGACGKTCLLI
--LPMTTIRKKLVIVGDGACGKTCLLI
--LPMTTIRKKLVIVGDGACGKTCLLI
--LPMTTIRKKLVIVGDGACGKTCLLI
ASSYSLILPFA--ELPMTTIRKKLVIVGDGACGKTCLLI
HFILLDRRPA--KLPMTTIRKKLVIVGDGACGKTCLLI
--LPMTTIRKKLVIVGDGACGKTCLLI
--MAAIRKKLVIVGDGACGKTCLLI
* : * *

```

|          |       |              |      |                    |
|----------|-------|--------------|------|--------------------|
| 01:9606  | 90945 | 0#NP_786886  | RHOC | Homo_sapiens       |
| 01:9606  | 90945 | NM_001042678 | RHOC | Homo_sapiens       |
| 01:9606  | 90945 | NM_001042679 | RHOC | Homo_sapiens       |
| 01:9606  | 90945 | NM_175744    | RHOC | Homo_sapiens       |
| 04:9913  | 90945 | NM_001046138 | RHOC | Bos_taurus         |
| 06:10116 | 90945 | NM_001106461 | Rhoc | Rattus_norvegicus  |
| 07:10090 | 90945 | NM_001291859 | Rhoc | Mus_musculus       |
| 07:10090 | 90945 | NM_007484    | Rhoc | Mus_musculus       |
| 08:9031  | 90945 | NM_001029849 | RHOC | Gallus_gallus      |
| 09:8364  | 90945 | NM_00116569  | rhoc | Xenopus_tropicalis |

[illegible]

[illegible][illegible]

GRDMANRISAFGYLECSAKTKEGV-  
GRDMANRISAFGYLECSAKTKEGVREVFEMATragLQVRKNKRRRGCPIL  
GRDMANRISAFGYLECSAKTKEGVREVFEMATragLQVRKNKRRRGCPIL  
GRDMANRISAFGYLECSAKTKEGVREVFEMATragLQVRKNKRRRGCPIL  
GRDMANRISAFGYLECSAKTKEGVREVFEMATragLQVRKNKRRRGCPIL  
GRDMANRISAFGYLECSAKTKEGVREVFEMATragLQVRKNKRRRGCPIL  
GRDMANRISAFGYLECSAKTKEGVREVFEMATragLQVRKNKRRRGCPIL  
GRDMANRISAFGYLECSAKTKEGVREVFEMATragLQVRKNKRRRGCPIL  
GRDMANRISAFGYLECSAKTKEGVREVFEMATragLQVRKNKRRRGCPIL  
GREMANRINAFGYLECSAKTKDGVREVFEMATRAALQVRKHKRQKCSIL  
GRDMANRISAFGYLECSAKTKDGVREVFEMATRAALQVRKHKRSGCLL  
GRDMANRISAFGYLECSAKTKDGVREVFEMATRAALQVRKHKRSGCSLL  
GRDMANRINAFGYLECSAKTKEGVREVFEMATRAALQAKKRGGKNACALL  
GRDMANRINAFGYLECSAKTKDGVREVFEMATRAALQARKRGGKSGCLL  
GRAMAEKINAFAYLECSAKSKEGVRDVFETATRAALQVKKRK-KTRCLLL  
GRAMAEKINAFAYLECSAKSKEGVRDVFETATRAALQVKKRK-KTRCLLL  
GRAMAEKINAFAYLECSAKSKEGVRDVFETATRAALQVKKRK-KTRCLLL  
GRAMAEKINAFAYLECSAKSKEGVRDVFETATRAALQVKKRK-KTRCLLL  
GRAMAEKINAFAYLECSAKSKEGVRDVFETATRAALQVKKRK-KTRCLLL  
GRAIAEQIGAFAYLECSAKTKDGIREVFEKATQAAALQVKKK-KKSKCML

*SEPT9*

Ac-MLGHKTPEPAPR





|          |       |                |        |                   |
|----------|-------|----------------|--------|-------------------|
| 01:9606  | 90949 | 0#NP_001106963 | SEPT9  | Homo_sapiens      |
| 01:9606  | 90949 | 0#NP_001106964 | SEPT9  | Homo_sapiens      |
| 01:9606  | 90949 | 0#NP_001106965 | SEPT9  | Homo_sapiens      |
| 01:9606  | 90949 | 0#NP_001106966 | SEPT9  | Homo_sapiens      |
| 01:9606  | 90949 | 0#NP_001106967 | SEPT9  | Homo_sapiens      |
| 01:9606  | 90949 | 0#NP_001106968 | SEPT9  | Homo_sapiens      |
| 01:9606  | 90949 | 0#NP_001280624 | SEPT9  | Homo_sapiens      |
| 01:9606  | 90949 | 0#NP_001280625 | SEPT9  | Homo_sapiens      |
| 01:9606  | 90949 | 0#NP_001280626 | SEPT9  | Homo_sapiens      |
| 01:9606  | 90949 | 0#NP_001280627 | SEPT9  | Homo_sapiens      |
| 01:9606  | 90949 | 0#NP_006631    | SEPT9  | Homo_sapiens      |
| 01:9606  | 90949 | NM_001113491   | SEPT9  | Homo_sapiens      |
| 01:9606  | 90949 | NM_001113492   | SEPT9  | Homo_sapiens      |
| 01:9606  | 90949 | NM_001113493   | SEPT9  | Homo_sapiens      |
| 01:9606  | 90949 | NM_001113494   | SEPT9  | Homo_sapiens      |
| 01:9606  | 90949 | NM_001113495   | SEPT9  | Homo_sapiens      |
| 01:9606  | 90949 | NM_001113496   | SEPT9  | Homo_sapiens      |
| 01:9606  | 90949 | NM_001293695   | SEPT9  | Homo_sapiens      |
| 01:9606  | 90949 | NM_001293696   | SEPT9  | Homo_sapiens      |
| 01:9606  | 90949 | NM_001293697   | SEPT9  | Homo_sapiens      |
| 01:9606  | 90949 | NM_001293698   | SEPT9  | Homo_sapiens      |
| 01:9606  | 90949 | NM_006640      | SEPT9  | Homo_sapiens      |
| 06:10116 | 90949 | NM_001113497   | Sept9  | Rattus_norvegicus |
| 06:10116 | 90949 | NM_031837      | Sept9  | Rattus_norvegicus |
| 06:10116 | 90949 | NM_176856      | Sept9  | Rattus_norvegicus |
| 07:10090 | 90949 | NM_001113486   | Sept9  | Mus_musculus      |
| 07:10090 | 90949 | NM_001113487   | Sept9  | Mus_musculus      |
| 07:10090 | 90949 | NM_001113488   | Sept9  | Mus_musculus      |
| 07:10090 | 90949 | NM_017380      | Sept9  | Mus_musculus      |
| 08:9031  | 90949 | NM_001030701   | SEPT9  | Gallus_gallus     |
| 10:7955  | 90949 | NM_198911      | sept9a | Danio_rerio       |

[illegible]

|          |       |                |       |              |
|----------|-------|----------------|-------|--------------|
| 01:19:06 | 09049 | 0#NP_001106963 | SEPT9 | Homo_sapiens |
| 01:19:06 | 09049 | 0#NP_001106964 | SEPT9 | Homo_sapiens |
| 01:19:06 | 09049 | 0#NP_001106965 | SEPT9 | Homo_sapiens |
| 01:19:06 | 09049 | 0#NP_001106966 | SEPT9 | Homo_sapiens |
| 01:19:06 | 09049 | 0#NP_001106967 | SEPT9 | Homo_sapiens |
| 01:19:06 | 09049 | 0#NP_001106968 | SEPT9 | Homo_sapiens |
| 01:19:06 | 09049 | 0#NP_001280624 | SEPT9 | Homo_sapiens |
| 01:19:06 | 09049 | 0#NP_001280625 | SEPT9 | Homo_sapiens |
| 01:19:06 | 09049 | 0#NP_001280626 | SEPT9 | Homo_sapiens |
| 01:19:06 | 09049 | 0#NP_001280627 | SEPT9 | Homo_sapiens |
| 01:19:06 | 09049 | 0#NP_006631    | SEPT9 | Homo_sapiens |
| 01:19:06 | 09049 | NM_001113491   | SEPT9 | Homo_sapiens |
| 01:19:06 | 09049 | NM_001113492   | SEPT9 | Homo_sapiens |
| 01:19:06 | 09049 | NM_001113493   | SEPT9 | Homo_sapiens |
| 01:19:06 | 09049 | NM_001113494   | SEPT9 | Homo_sapiens |
| 01:19:06 | 09049 | NM_001113495   | SEPT9 | Homo_sapiens |

[illegible]

QGFEFNIMVVQSGGLGKSTLINTLFKSKISRKSVPQTSEERIPKPTIEKSITHDIEEKGV  
QGFELNIMVVQSGGLGKSTLMTLFLKSKSVRSKFSMGTAEEKIPKPTIEKSVSHDIEEKGV

[illegible][illegible]

---



# *KCTD3*

Ac-GEAPCTPRPPAAAAPLALQPSPLPR  
Ac-MEAGPPLCTAGLTR

CLUSTAL O(1.2.1) multiple sequence alignment

|                                                        |                                                                   |
|--------------------------------------------------------|-------------------------------------------------------------------|
| 00:1 Ac-GEAPCTPRPPAAAAPLALQPSPLPR                      | -----GEA                                                          |
| 00:2 Ac-MEAGPPLCTAGLTR                                 | -----MEAGPPL--CTAGLTR-----                                        |
| 01:9606 9395 0#NP_057205 KCTD3 Homo_sapiens            |                                                                   |
| 01:9606 9395 NM_016121 KCTD3 Homo_sapiens              | VGGSGARRRGPGGPAAWRPRKVEAGPPL--CTAGLTREGAEA-SEPRP---AAGKVGEA       |
| 03:9544 9395 NM_001261234 KCTD3 Macaca_mulatta         | ---RKRRRGPGGPAAWRPRKVEAGPPL--CAAGLTGEGAEA-SKPRP---AAGKVGEA        |
| 04:9913 9395 NM_001191424 KCTD3 Bos_taurus             | -----                                                             |
| 06:10116 9395 NM_001107199 Kctd3 Rattus_norvegicus     | -----RRLWRPPWRRVGPPEERPGWAGGLQPREAEAASTQRERQARAGTLREA             |
| 07:10090 9395 NM_172650 Kctd3 Mus_musculus             | -----WGRLERAGPLREA                                                |
| 12:7227 9395 NM_141695 CG9467 Drosophila_melanogaster  | -----                                                             |
| 13:6239 9395 NM_072776 T23B12.6 Caenorhabditis_elegans | -----                                                             |
| 00:1 Ac-GEAPCTPRPPAAAAPLALQPSPLPR                      | PCTPRPPAAAAPLALQPSPLPR-----                                       |
| 00:2 Ac-MEAGPPLCTAGLTR                                 | -----                                                             |
| 01:9606 9395 0#NP_057205 KCTD3 Homo_sapiens            | -----MAGGHCGSFPA-AA                                               |
| 01:9606 9395 NM_016121 KCTD3 Homo_sapiens              | PCTPRPPAAAAPLALQPSPLPRATAPGSAPVAGEGRRRARPEPPPEMAGGHCGSFPA-AA      |
| 03:9544 9395 NM_001261234 KCTD3 Macaca_mulatta         | PCNPRPPAAAAALLALQPSPLPRATAPGSAPVQAGEGRRRARPEPPPEMAGGHCGSFPA-AA    |
| 04:9913 9395 NM_001191424 KCTD3 Bos_taurus             | -----GRRVPSEPPDMAGGHCGSFPA-AA                                     |
| 06:10116 9395 NM_001107199 Kctd3 Rattus_norvegicus     | RRS-----ECALAAEPPLL-----APAS-----A-----PTADMAGGHCGSFPA-AA         |
| 07:10090 9395 NM_172650 Kctd3 Mus_musculus             | RRS-----ECAPAAEPPLL-----APAP-----APALAPAPAADMAGGHCGSFPA-AA        |
| 12:7227 9395 NM_141695 CG9467 Drosophila_melanogaster  | -----SNPHRPLLQRPAGHRIAMSHFT-HA                                    |
| 13:6239 9395 NM_072776 T23B12.6 Caenorhabditis_elegans | -----MAHQPCSSSSFSNDS                                              |
| 00:1 Ac-GEAPCTPRPPAAAAPLALQPSPLPR                      | -----                                                             |
| 00:2 Ac-MEAGPPLCTAGLTR                                 | -----                                                             |
| 01:9606 9395 0#NP_057205 KCTD3 Homo_sapiens            | GSGEIVQLNVGGTRFSTSRQTLMWIPDSFFSSLLSGRISTLRDETGAIFIDRDPAAFAP I     |
| 01:9606 9395 NM_016121 KCTD3 Homo_sapiens              | GSGEIVQLNVGGTRFSTSRQTLMWIPDSFFSSLLSGRISTLRDETGAIFIDRDPAAFAP I     |
| 03:9544 9395 NM_001261234 KCTD3 Macaca_mulatta         | GSGEIVQLNVGGTRFSTSRQTLMWIPDSFFSSLLSGRISTLRDETGAIFIDRDPAAFAP I     |
| 04:9913 9395 NM_001191424 KCTD3 Bos_taurus             | GSGEIVQLNVGGTRFSTSRQTLMWIPDSFFSSLLSGRISTLRDETGAIFIDRDPAAFAP I     |
| 06:10116 9395 NM_001107199 Kctd3 Rattus_norvegicus     | SSGEIVQLNVGGTRFSTSRQTLMWIPDSFFSSLLSGRISTLRDETGAIFIDRDPAAFAP I     |
| 07:10090 9395 NM_172650 Kctd3 Mus_musculus             | SSGEIVQLNVGGTRFSTSRQTLMWIPDSFFSSLLSGRISTLRDETGAIFIDRDPAAFAP I     |
| 12:7227 9395 NM_141695 CG9467 Drosophila_melanogaster  | SSSDLVNLNVGGQRFSTSRQTLTWIPDTFFTTALLSGRISSLRDEHNAIFIDRDP TLF S I I |
| 13:6239 9395 NM_072776 T23B12.6 Caenorhabditis_elegans | GSDYIVNLNVGGRI FATSCNTLTWIPDSFFT SLLSGRMNSVKDPSGAIFIDRDPDLFRVI    |
| 00:1 Ac-GEAPCTPRPPAAAAPLALQPSPLPR                      | -----                                                             |
| 00:2 Ac-MEAGPPLCTAGLTR                                 | -----                                                             |
| 01:9606 9395 0#NP_057205 KCTD3 Homo_sapiens            | LNFLRTKELDLRGVSINVLRHEAEFYGITPLVRRLLLCHEELERSSCGSVLFHGYP LPPPGI   |
| 01:9606 9395 NM_016121 KCTD3 Homo_sapiens              | LNFLRTKELDLRGVSINVLRHEAEFYGITPLVRRLLLCHEELERSSCGSVLFHGYP LPPPGI   |
| 03:9544 9395 NM_001261234 KCTD3 Macaca_mulatta         | LNFLRTKELDLRGVSINVLRHEAEFYGITPLVRRLLLCHEELERSSCGSVLFHGYP LPPPGI   |
| 04:9913 9395 NM_001191424 KCTD3 Bos_taurus             | LNFLRTKELDLRGVSINVLRHEAEFYGITPLVRRLLLCHEELERSSCGSVLFHGYP LPPPGI   |
| 06:10116 9395 NM_001107199 Kctd3 Rattus_norvegicus     | LNFLRTKELDLRGVSINVLRHEAEFYGITPLVRRLLLCHEELERSSCGSVLFHGYP LPPPGI   |
| 07:10090 9395 NM_172650 Kctd3 Mus_musculus             | LNFLRTKELDLRGVSINVLRHEAEFYGITPLVRRLLLCHEELERSSCGSVLFHGYP LPPPGI   |
| 12:7227 9395 NM_141695 CG9467 Drosophila_melanogaster  | LNFLRTKELDLRGVSINVLRHEAEFYGITPLVRRLLLCHEELERSSCGSVLFHGYP LPPPGI   |
| 13:6239 9395 NM_072776 T23B12.6 Caenorhabditis_elegans | LNFLRTKELDLRGVSINVLRHEAEFYGITPLVRRLLLCHEELERSSCGSVLFHGYP LPPPGI   |
| 00:1 Ac-GEAPCTPRPPAAAAPLALQPSPLPR                      | -----                                                             |
| 00:2 Ac-MEAGPPLCTAGLTR                                 | -----                                                             |
| 01:9606 9395 0#NP_057205 KCTD3 Homo_sapiens            | PSRKINNTVR-S-----ADSRNG-----LNSTEGEARGNG                          |
| 01:9606 9395 NM_016121 KCTD3 Homo_sapiens              | PSRKINNTVR-S-----ADSRNG-----LNSTEGEARGNG                          |
| 03:9544 9395 NM_001261234 KCTD3 Macaca_mulatta         | PSRKINNTVR-S-----ADSRNG-----LNSTEGEARGNG                          |
| 04:9913 9395 NM_001191424 KCTD3 Bos_taurus             | PSRKINNTTRSS-----ADSRNG-----LNFTEGEARGNG                          |
| 06:10116 9395 NM_001107199 Kctd3 Rattus_norvegicus     | PSRKGNTTARSS-----VDARNG-----LSSMEGEARGSG                          |
| 07:10090 9395 NM_172650 Kctd3 Mus_musculus             | PSRKINTTARSS-----VDARNG-----LNSMEGEARGNG                          |
| 12:7227 9395 NM_141695 CG9467 Drosophila_melanogaster  | PSNEAVAATSVDESLPSTSASAI GSRPGSMVRVPESRSSHSRNSSWDLRLGRTGSTGNG      |
| 13:6239 9395 NM_072776 T23B12.6 Caenorhabditis_elegans | PLENL PNEKSRSPMYSNSETS---TNN-----SNKNSNG                          |
| 00:1 Ac-GEAPCTPRPPAAAAPLALQPSPLPR                      | -----                                                             |
| 00:2 Ac-MEAGPPLCTAGLTR                                 | -----                                                             |
| 01:9606 9395 0#NP_057205 KCTD3 Homo_sapiens            | TQP---VLSGTG-----EETVRLGFPVDPKVKLIVAG                             |
| 01:9606 9395 NM_016121 KCTD3 Homo_sapiens              | TQP---VLSGTG-----EETVRLGFPVDPKVKLIVAG                             |
| 03:9544 9395 NM_001261234 KCTD3 Macaca_mulatta         | TQP---VLSGTG-----EETVRLGFPVDPKVKLIVAG                             |
| 04:9913 9395 NM_001191424 KCTD3 Bos_taurus             | TQP---VLSGTG-----EETVRLGFPVDPKVKLIVAG                             |
| 06:10116 9395 NM_001107199 Kctd3 Rattus_norvegicus     | TQP---VLAGNG-----EDTIRLGVPVDPKVKLIVAG                             |
| 07:10090 9395 NM_172650 Kctd3 Mus_musculus             | TQP---VLAGNG-----EDTIRLGVPVDPKVKLIVAG                             |
| 12:7227 9395 NM_141695 CG9467 Drosophila_melanogaster  | ANPPAPMLHSRNP SIDFMRHSRNSSADLNKVF RNEVG-LVFSPTQNSNWDPLRQ IKA      |
| 13:6239 9395 NM_072776 T23B12.6 Caenorhabditis_elegans | S-----PRHRGSKKQSTDMSRYIKNELSELAKSKSQPDRD TDPMKV RMIRA             |
| 00:1 Ac-GEAPCTPRPPAAAAPLALQPSPLPR                      | -----                                                             |
| 00:2 Ac-MEAGPPLCTAGLTR                                 | -----                                                             |
| 01:9606 9395 0#NP_057205 KCTD3 Homo_sapiens            | HHNWIVAAYAHFAVCYRIKESSGWQQVFTSPYLDWTIERNALNAKVVG GPH-GDKDKMVA     |
| 01:9606 9395 NM_016121 KCTD3 Homo_sapiens              | HHNWIVAAYAHFAVCYRIKESSGWQQVFTSPYLDWTIERNALNAKVVG GPH-GDKDKMVA     |
| 03:9544 9395 NM_001261234 KCTD3 Macaca_mulatta         | HHNWIVAAYAHFAVCYRIKESSGWQQVFTSPYLDWTIERNALNAKVVG GPH-GDKDKMVA     |
| 04:9913 9395 NM_001191424 KCTD3 Bos_taurus             | HHNWIVAAYAHFAVCYRIKESSGWQQVFTSPYLDWTIERNALNAKVVG GPH-GDKDKMVA     |
| 06:10116 9395 NM_001107199 Kctd3 Rattus_norvegicus     | HHNWIVAAYAHFAVCYRIKESSGWQQVFTSPYLDWTIERNALNAKVVG GPH-GDKDKMVA     |
| 07:10090 9395 NM_172650 Kctd3 Mus_musculus             | HHNWIVAAYAHFAVCYRIKESSGWQQVFTSPYLDWTIERNALNAKVVG GPH-GDKDKMVA     |
| 12:7227 9395 NM_141695 CG9467 Drosophila_melanogaster  | HQNWIAVAYAHFVTCYRVKDSNGWQQVFTSPHIDATIERIAINSKVNTSAAEPLPSKMVA      |
| 13:6239 9395 NM_072776 T23B12.6 Caenorhabditis_elegans | HICSIVVAYSFYFVCYRVTEWNTYVLLWKS PRARTYVSHIAVNTKIAATVA-----ERLVA    |

00:1|Ac-GEAPCTPRPPAAAAPLALQPSPLPR  
00:2|Ac-MEAGPPLCTAGLTR  
01:9606|9395|0#NP\_057205|KCTD3|Homo\_sapiens  
01:9606|9395|NM\_016121|KCTD3|Homo\_sapiens  
03:9544|9395|NM\_001261234|KCTD3|Macaca\_mulatta  
04:9913|9395|NM\_001191424|KCTD3|Bos\_taurus  
06:10116|9395|NM\_001107199|Kctd3|Rattus\_norvegicus  
07:10090|9395|NM\_172650|Kctd3|Mus\_musculus  
12:7227|9395|NM\_141695|CG9467|Drosophila\_melanogaster  
13:6239|9395|NM\_072776|T23B12.6|Caenorhabditis\_elegans

00:1|Ac-GEAPCTPRPPAAAAPLALQPSPLPR  
00:2|Ac-MEAGPPLCTAGLTR  
01:9606|9395|0#NP\_057205|KCTD3|Homo\_sapiens  
01:9606|9395|NM\_016121|KCTD3|Homo\_sapiens  
03:9544|9395|NM\_001261234|KCTD3|Macaca\_mulatta  
04:9913|9395|NM\_001191424|KCTD3|Bos\_taurus  
06:10116|9395|NM\_001107199|Kctd3|Rattus\_norvegicus  
07:10090|9395|NM\_172650|Kctd3|Mus\_musculus  
12:7227|9395|NM\_141695|CG9467|Drosophila\_melanogaster  
13:6239|9395|NM\_072776|T23B12.6|Caenorhabditis\_elegans

00:1|Ac-GEAPCTPRPPAAAAPLALQPSPLPR  
00:2|Ac-MEAGPPLCTAGLTR  
01:9606|9395|0#NP\_057205|KCTD3|Homo\_sapiens  
01:9606|9395|NM\_016121|KCTD3|Homo\_sapiens  
03:9544|9395|NM\_001261234|KCTD3|Macaca\_mulatta  
04:9913|9395|NM\_001191424|KCTD3|Bos\_taurus  
06:10116|9395|NM\_001107199|Kctd3|Rattus\_norvegicus  
07:10090|9395|NM\_172650|Kctd3|Mus\_musculus  
12:7227|9395|NM\_141695|CG9467|Drosophila\_melanogaster  
13:6239|9395|NM\_072776|T23B12.6|Caenorhabditis\_elegans

00:1|Ac-GEAPCTPRPPAAAAPLALQPSPLPR  
00:2|Ac-MEAGPPLCTAGLTR  
01:9606|9395|0#NP\_057205|KCTD3|Homo\_sapiens  
01:9606|9395|NM\_016121|KCTD3|Homo\_sapiens  
03:9544|9395|NM\_001261234|KCTD3|Macaca\_mulatta  
04:9913|9395|NM\_001191424|KCTD3|Bos\_taurus  
06:10116|9395|NM\_001107199|Kctd3|Rattus\_norvegicus  
07:10090|9395|NM\_172650|Kctd3|Mus\_musculus  
12:7227|9395|NM\_141695|CG9467|Drosophila\_melanogaster  
13:6239|9395|NM\_072776|T23B12.6|Caenorhabditis\_elegans

00:1|Ac-GEAPCTPRPPAAAAPLALQPSPLPR  
00:2|Ac-MEAGPPLCTAGLTR  
01:9606|9395|0#NP\_057205|KCTD3|Homo\_sapiens  
01:9606|9395|NM\_016121|KCTD3|Homo\_sapiens  
03:9544|9395|NM\_001261234|KCTD3|Macaca\_mulatta  
04:9913|9395|NM\_001191424|KCTD3|Bos\_taurus  
06:10116|9395|NM\_001107199|Kctd3|Rattus\_norvegicus  
07:10090|9395|NM\_172650|Kctd3|Mus\_musculus  
12:7227|9395|NM\_141695|CG9467|Drosophila\_melanogaster  
13:6239|9395|NM\_072776|T23B12.6|Caenorhabditis\_elegans

00:1|Ac-GEAPCTPRPPAAAAPLALQPSPLPR  
00:2|Ac-MEAGPPLCTAGLTR  
01:9606|9395|0#NP\_057205|KCTD3|Homo\_sapiens  
01:9606|9395|NM\_016121|KCTD3|Homo\_sapiens  
03:9544|9395|NM\_001261234|KCTD3|Macaca\_mulatta  
04:9913|9395|NM\_001191424|KCTD3|Bos\_taurus  
06:10116|9395|NM\_001107199|Kctd3|Rattus\_norvegicus  
07:10090|9395|NM\_172650|Kctd3|Mus\_musculus  
12:7227|9395|NM\_141695|CG9467|Drosophila\_melanogaster  
13:6239|9395|NM\_072776|T23B12.6|Caenorhabditis\_elegans

00:1|Ac-GEAPCTPRPPAAAAPLALQPSPLPR  
00:2|Ac-MEAGPPLCTAGLTR  
01:9606|9395|0#NP\_057205|KCTD3|Homo\_sapiens  
01:9606|9395|NM\_016121|KCTD3|Homo\_sapiens  
03:9544|9395|NM\_001261234|KCTD3|Macaca\_mulatta  
04:9913|9395|NM\_001191424|KCTD3|Bos\_taurus  
06:10116|9395|NM\_001107199|Kctd3|Rattus\_norvegicus  
07:10090|9395|NM\_172650|Kctd3|Mus\_musculus  
12:7227|9395|NM\_141695|CG9467|Drosophila\_melanogaster  
13:6239|9395|NM\_072776|T23B12.6|Caenorhabditis\_elegans

00:1|Ac-GEAPCTPRPPAAAAPLALQPSPLPR

-----  
VAS-ESSIILWSVQDGGSGSEIGVFSLGVPVDALFFIGNQLVATSHTGKVGWVNAVQTQHW  
VAS-ESSIILWSVQDGGSGSEIGVFSLGVPVDALFFIGNQLVATSHTGKVGWVNAVQTQHW  
VAS-ESSIILWSVQDGGSGSEIGVFSLGVPVDALFFIGNQLVATSHTGKVGWVNAVQTQHW  
VAS-ESSIILWSVQDGGSGSEIGVFSLGVPVDALFFIGNQLVATSHTGKVGWVNAVQTQHW  
VAS-ESSIILWSVQDGGSGSEIGVFSLGVPVDALFFIGNQLVATSHTGKVGWVNAVQTQHW  
VAS-ESSIILWSVQDGGSGSEIGVFSLGVPVDALFFIGNQLVATSHTGKVGWVNAVQTQHW  
ISY-GSQIRLWSIQEGGQKTDVGTFNLNVRVEYLLFFIGNQLVALSSSGKIGVWHAMTQHW  
VSFQDDTIGLWHIDDEGKTEKKGLFSMNVSIDNLFFVGTQMVALSKSGKVGWIHSATQNW

-----  
QVQDVVPITSYDTAGSFLLLGCNNGSIYYIDMQKFPLRMKDNDLLVTELYHDPNSDAITA  
QVQDVVPITSYDTAGSFLLLGCNNGSIYYIDMQKFPLRMKDNDLLVTELYHDPNSDAITA  
QVQDVVPITSYDTAGSFLLLGCNNGSIYYIDMQKFPLRMKDNDLLVTELYHDPNSDAITA  
QVQDVVPITSYDTAGSFLLLGCNNGSIYYIDMQKFPLRMKDNDLLVTELYHDPNSDAITA  
QVQDVVPITSYDTAGSFLLLGCNNGSIYYIDMQKFPLRMKDNDLLVTELYHDPNSDAITA  
QVQDVVPITSYDTAGSFLLLGCNNGSIYYIDMQKFPLRMKDNDLLVTELYHDPNSDAITA  
QVQDVVPITSYDTAGSFLLLGCNNGSIYYIDMQKFPLRMKDNDLLVTELYHDPNSDAITA  
QVQDVVPITSYDTAGSFLLLGCNNGSIYYIDMQKFPLRMKDNDLLVTELYHDPNSDAITA  
QVQDVVPITSYDTAGSFLLLGCNNGSIYYIDMQKFPLRMKDNDLLVTELYHDPNSDAITA  
QVQDVVPITSYDTAGSFLLLGCNNGSIYYIDMQKFPLRMKDNDLLVTELYHDPNSDAITA

-----  
LSVYLTPKT-SVSGNWIEIAYGTSSGAVRVIVQHPETVGSQPQLFQTFTVHRSPVTKIML  
LSVYLTPKT-SVSGNWIEIAYGTSSGAVRVIVQHPETVGSQPQLFQTFTVHRSPVTKIML  
LSVYLTPKT-SVSGNWIEIAYGTSSGAVRVIVQHPETVGSQPQLFQTFTVHRSPVTKIML  
LSVYLTPKT-SVSGNWIEIAYGTSSGAVRVIVQHPETVGSQPQLFQTFTVHRSPVTKIML  
LSVYLTPKT-SVSGNWIEIAYGTSSGAVRVIVQHPETVGSQPQLFQTFTVHRSPVTKIML  
LSVYLTPKT-SVSGNWIEIAYGTSSGAVRVIVQHPETVGSQPQLFQTFTVHRSPVTKIML  
LSVYLTPKT-SVSGNWIEIAYGTSSGAVRVIVQHPETVGSQPQLFQTFTVHRSPVTKIML  
LSVYLTPKT-SVSGNWIEIAYGTSSGAVRVIVQHPETVGSQPQLFQTFTVHRSPVTKIML  
LSVYLTPKT-SVSGNWIEIAYGTSSGAVRVIVQHPETVGSQPQLFQTFTVHRSPVTKIML  
LSVYLTPKT-SVSGNWIEIAYGTSSGAVRVIVQHPETVGSQPQLFQTFTVHRSPVTKIML

-----  
SEKHLVSVCADNNHVRTWTVTFRFGMISTQPGSTPLASFKILSLEETESHGYSYSSGNDIG  
NTSHLISVCSEYNHVRSWNVTRFRGMINTQPGTVPLASFVKVLTLDSDIDETD-RQYNHPG

-----  
PFGERDDQQVFIQKVVPITNKLFLVRLSSTGKRICEIQAVDCTTISSFTVRECEGSSRMGS  
PFGERDDQQVFIQKVVPITNKLFLVRLSSTGKRICEIQAVDCTTISSFTVRECEGSSRMGS  
PFGERDDQQVFIQKVVPITNKLFLVRLSSTGKRICEIQAVDCTTISSFTVRECEGSSRMGS  
PFGERDDQQVFIQKVVPITNKLFLVRLSSTGKRICEIQAVDCTTISSFTVRECEGSSRMGS  
PFGERDDQQVFIQKVVPITNKLFLVRLSSTGKRICEIQAVDCTTISSFTVRECEGSSRMGS  
PFGERDDQQVFIQKVVPITNKLFLVRLSSTGKRICEIQAVDCTTISSFTVRECEGSSRMGS  
PFGERDDQQVFIQKVVPITNKLFLVRLSSTGKRICEIQAVDCTTISSFTVRECEGSSRMGS  
PYGDYDD-MIFVQKVVPETDQLYVRLASNGDRVCVIRSVDSSTISAFVLECEVSS----  
PYGDQDSEQVLIQRLIPNAQKLFVRLASTGERICTVDSVEDSPITAFVCHELDQG-KLGS

-----  
RPRRYLFTGHTNGSIQMWDLTTAMD MVNK---SE--D-----  
RPRRYLFTGHTNGSIQMWDLTTAMD MVNK---SE--D-----  
RPRRYLFTGHTNGSIQMWDLTTAMD MVNK---SE--D-----  
RPRRYLFTGHTNGSIQMWDLTTAMD MVNK---SE--D-----  
RPRRYLFTGHTNGSIQMWDLTTAMD MVNK---SE--D-----  
RPRRYLFTGHTNGSIQMWDLTTAMD MVNK---SE--D-----  
RPRRYLFTGHTNGSIQMWDLTTAMD MVNK---TE--D-----  
---RFILTGHCNGAIQMWDLTTALALLSK---DEPQQ-----  
RLRKYLPFCGNGSGSVQVWDLTSALDQFHLKNGSHPQQQQVNPPAAANQSELIKPQLAQSP

-----  
-----KDVGGPTEEEELKLLDQCDLSTSRCATPNISPATSVVQHSRLRES-----NS  
-----KDVGGPTEEEELKLLDQCDLSTSRCATPNISPATSVVQHSRLRES-----NS  
-----KDVGGPTEEEELKLLDQCDLSTSRCATPNISPATSVVQHSRLRES-----NS  
-----KDVGGPTEEEELKLLDQCDLSTSRCATPNISPATSVVQHSRLRES-----SS  
-----KDAGGPTEEEELKLLDQCDLSTSRCATPNISPATSVLQHSRLRES-----SS  
-----KDAGGPTEEEELKLLDQCDLSTSRCATPNISPATSVLQHSRLRES-----SS  
-----KINGGPDNTNELLRLDQCEISNSSCTTPCMSPCLSAMNGSGSGMASSIAARMKAS  
RSLINLSNYSGGPTPQELLDVIDDNDI---CCSTPSLRCPFAAFQ-----

SLQLQHHDTTHEAATYGSMPRYRESPLLARARRTSFHYSYRDFQTINLNRNVERAVPENG  
SLQLQHHDTTHEAATYGSMPRYRESPLLARARRTSFHYSYRDFQTINLNRNVERAVPENG  
SLQLQHHDTTHEAATYGSMPRYRESPLLARARRTSFHYSYRDFQTINLNRNVERAVPENG  
SLQLQHHETIHEAATYGSIRPYRESPLLARARRTSFHYSYRDFQTIVNLNRNIERAVPENG  
SLQLQHHETIHEAATYGATRPYRESPLLARARRTSFHYSYRDLQTLNLTNRVTVERAVPENG  
SLQLQHHETIHEAATYGATRPYRESPLLARARRTSFHYSYRDFQTLNLTNRSIERPVPENG  
NIALLNREPAMAMAVQAVQPPAQVQPALPEAVAPAA-----AIPMAD

```

-----
NLGPIQAEVKGGA-TGECNISERKSPGVEIKSLRELDGSLGVHVKIAEGFSESKKRSSDEN
NLGPIQAEVKGGA-TGECNISERKSPGVEIKSLRELDGSLGVHVKIAEGFSESKKRSSDEN
NLGPIQAEVKGKV-TGECNISERKSPGVEIKSLRELDGSLGVHVKIAEGFSESKKRSSDEN
NLGPIQAEVKRA-AGECNVSEKSPGTEVKSRLREDSVVVEVHRLAEGFLESKKRSSDEN
HTGPAQAEAKGAAAGCAVCERKSPGTGRCVREPVDGLDVHRPAEGLSEPKKRSTEDEN
HMGPAQTEVKGGA-AGECAMSERRSPGTEVRCGRESDDGGLGVHRTAEGLESPKKRSAEDEN
D-----NNE-----
-----

```

```
-----
ENKIEFRKKGGFEGGGFLGRKKVPYLASSPSTDGGTDSPGTASPSTKTTSPRHKKSD
ENKIEFRKKGGFEGGGFLGRKKVPYLASSPSTDGGTDSPGTASPSTKTTSPRHKKSD
ENKIEFRKKGGFEGGGFLGRKKVPYLVSSPSTDGGTDSPGTASPSTKTTSPRHKKSD
ENKVESRKKGGFEGGGFLRKKESPSLGIFTKYV-----
EPKVEFRKK-GFEAGGFLGRKKVPYLASSPSTDGGTDSPGTASPSTKTTSPRHKKSD
EHKVEFRKK-GFEAGGFLGRKKVPYLASSPSTDGGTDSPGTASPSTKTTSPRHKKSD
-----
```

```

-----
SSGQEYSL
SSGQEYSL
SSGQEYSL
-----
SSGQEYSL
SSGQEYSL
-----

```

# *KCTD9*

Ac-AAHSGPSGGSAMR  
Ac-AKGGESEWVEGGEGR

CLUSTAL O(1.2.1) multiple sequence alignment

|                                                        |                                                                 |
|--------------------------------------------------------|-----------------------------------------------------------------|
| 00:1 Ac-AAHSGPSGGSAMR                                  | -----                                                           |
| 00:2 Ac-AKGGESEWVEGGEGR                                | -----AKGGESEWVEG----                                            |
| 01:9606 9754 0#NP_060104 KCTD9 Homo_sapiens            |                                                                 |
| 01:9606 9754 NM_017634 KCTD9 Homo_sapiens              | RQAEERPGGVGRRTGRTLG-----V-GQSACVWCVPKGRKVAKGGESEWVEG----        |
| 03:9544 9754 NM_001260902 KCTD9 Macaca_mulatta         | -----                                                           |
| 06:10116 9754 NM_001108871 Kctd9 Rattus_norvegicus     | -----GRGGKE--DRPTPG-----CGTEGACVRSVGPTRKVAKGGESGWEAG----        |
| 07:10090 9754 NM_001111028 Kctd9 Mus_musculus          | -----                                                           |
| 07:10090 9754 NM_001285933 Kctd9 Mus_musculus          | -----GRGGKE--DRPTPG-----CGTEGACVRSVGPTRKVAKGGESGWEAG----        |
| 07:10090 9754 NM_134073 Kctd9 Mus_musculus             | -----                                                           |
| 08:9031 9754 NM_001012839 KCTD9 Gallus_gallus          | -----                                                           |
| 09:8364 9754 NM_001127016 kctd9 Xenopus_tropicalis     | -----                                                           |
| 12:7227 9754 NM_141208 CG14647 Drosophila_melanogaster | -----                                                           |
| 15:3702 9754 NM_117810 FIP2 Arabidopsis_thaliana       | -----WISRRHGRHFFHAVTVATTTTTRRVPPPCWTDEETAALVNAYKDKWFALRRGN      |
| 15:3702 9754 NM_124882 FIP2 Arabidopsis_thaliana       | -----                                                           |
| 15:3702 9754 NM_180862 FIP2 Arabidopsis_thaliana       | -----                                                           |
| 00:1 Ac-AAHSGPSGGSAMR                                  | -----AAHSGPSGGSAMR-----                                         |
| 00:2 Ac-AKGGESEWVEGGEGR                                | -----GEGR-----                                                  |
| 01:9606 9754 0#NP_060104 KCTD9 Homo_sapiens            | -----MRRVTLFLNGS-PKNGKVAVVY                                     |
| 01:9606 9754 NM_017634 KCTD9 Homo_sapiens              | -----GEGREE-KKVGGPGGGRVAAHSGPSGGSAMRRVTLFLNGS-PKNGKVAVVY        |
| 03:9544 9754 NM_001260902 KCTD9 Macaca_mulatta         | -----REE-KKVGVGPGGRVAAHSGPSGGSAMRRVTLFLNGS-PKNGKVAVVY           |
| 06:10116 9754 NM_001108871 Kctd9 Rattus_norvegicus     | -----RAR-SAAGGGPGERVAAPSGPGAGGAMRRVTLFLNGS-PRNGKVAVVY           |
| 07:10090 9754 NM_001111028 Kctd9 Mus_musculus          | -----GVSRAR-SAAGGGPGARVAAPSGPGAGGAMRRVTLFLNGS-PSNGKVAVVY        |
| 07:10090 9754 NM_001285933 Kctd9 Mus_musculus          | -----                                                           |
| 07:10090 9754 NM_134073 Kctd9 Mus_musculus             | -----GVSRAR-SAAGGGPGARVAAPSGPGAGGAMRRVTLFLNGS-PSNGKVAVVY        |
| 08:9031 9754 NM_001012839 KCTD9 Gallus_gallus          | -----AGRRWRSMRRVTLFVNGS-PRNGKVAVVY                              |
| 09:8364 9754 NM_001127016 kctd9 Xenopus_tropicalis     | -----CRGDLSMRRVTLFVRGS-SRHGKVVLVS                               |
| 12:7227 9754 NM_141208 CG14647 Drosophila_melanogaster | -----EREDKAAENC                                                 |
| 15:3702 9754 NM_117810 FIP2 Arabidopsis_thaliana       | LRAADWDDVAAAVSSSSTVGGPPKSAI---QCRHKIE--KLRKRYRGEKQALNRPGKF      |
| 15:3702 9754 NM_124882 FIP2 Arabidopsis_thaliana       | -----                                                           |
| 15:3702 9754 NM_180862 FIP2 Arabidopsis_thaliana       | -----                                                           |
| 00:1 Ac-AAHSGPSGGSAMR                                  | -----                                                           |
| 00:2 Ac-AKGGESEWVEGGEGR                                | -----                                                           |
| 01:9606 9754 0#NP_060104 KCTD9 Homo_sapiens            | GTLSDLLSVAS-----                                                |
| 01:9606 9754 NM_017634 KCTD9 Homo_sapiens              | GTLSDLLSVAS-----                                                |
| 03:9544 9754 NM_001260902 KCTD9 Macaca_mulatta         | GTLSDLLSVAS-----                                                |
| 06:10116 9754 NM_001108871 Kctd9 Rattus_norvegicus     | GTLSDLLSVAS-----                                                |
| 07:10090 9754 NM_001111028 Kctd9 Mus_musculus          | GTLSDLLSVAS-----                                                |
| 07:10090 9754 NM_001285933 Kctd9 Mus_musculus          | -----                                                           |
| 07:10090 9754 NM_134073 Kctd9 Mus_musculus             | GTLSDLLSVAS-----                                                |
| 08:9031 9754 NM_001012839 KCTD9 Gallus_gallus          | GTLSDLLSVAS-----                                                |
| 09:8364 9754 NM_001127016 kctd9 Xenopus_tropicalis     | GSLSDLLSLAS-----                                                |
| 12:7227 9754 NM_141208 CG14647 Drosophila_melanogaster | QALWKFFKLPN-----                                                |
| 15:3702 9754 NM_117810 FIP2 Arabidopsis_thaliana       | SSSWDLFPILDAMGFAPVTPAAVETYDPDVDHDDENGLDGFVRVRSKRSGKFSGGYSDSP    |
| 15:3702 9754 NM_124882 FIP2 Arabidopsis_thaliana       | -----                                                           |
| 15:3702 9754 NM_180862 FIP2 Arabidopsis_thaliana       | -----                                                           |
| 00:1 Ac-AAHSGPSGGSAMR                                  | -----                                                           |
| 00:2 Ac-AKGGESEWVEGGEGR                                | -----                                                           |
| 01:9606 9754 0#NP_060104 KCTD9 Homo_sapiens            | -----SKLGIKATSVYNGKGLIDDIALIRDDD                                |
| 01:9606 9754 NM_017634 KCTD9 Homo_sapiens              | -----SKLGIKATSVYNGKGLIDDIALIRDDD                                |
| 03:9544 9754 NM_001260902 KCTD9 Macaca_mulatta         | -----SKLGIKATSVYNGKGLIDDIALIRDDD                                |
| 06:10116 9754 NM_001108871 Kctd9 Rattus_norvegicus     | -----SKLGIKATSVYNGKGLIDDIALIRDDD                                |
| 07:10090 9754 NM_001111028 Kctd9 Mus_musculus          | -----SKLGIKATSVYNGKGLIDDIALIRDDD                                |
| 07:10090 9754 NM_001285933 Kctd9 Mus_musculus          | -----                                                           |
| 07:10090 9754 NM_134073 Kctd9 Mus_musculus             | -----SKLGIKATSVYNGKGLIDDIALIRDDD                                |
| 08:9031 9754 NM_001012839 KCTD9 Gallus_gallus          | -----NKLGIKATSVYNGKGLIDDIALIRDDD                                |
| 09:8364 9754 NM_001127016 kctd9 Xenopus_tropicalis     | -----IRFGIQATQVFNENGQIDDVSLIRDDD                                |
| 12:7227 9754 NM_141208 CG14647 Drosophila_melanogaster | -----QMNSDLKESGSGARKDDAAP-----                                  |
| 15:3702 9754 NM_117810 FIP2 Arabidopsis_thaliana       | REVGDGYGVRSRARSNMKMYGGFKSEFDSHDHSGSGFGLKRKYNGNPKVSADFDADSDDE    |
| 15:3702 9754 NM_124882 FIP2 Arabidopsis_thaliana       | -----TK                                                         |
| 15:3702 9754 NM_180862 FIP2 Arabidopsis_thaliana       | -----TK                                                         |
| 00:1 Ac-AAHSGPSGGSAMR                                  | -----                                                           |
| 00:2 Ac-AKGGESEWVEGGEGR                                | -----                                                           |
| 01:9606 9754 0#NP_060104 KCTD9 Homo_sapiens            | VLFVCEGEPFI-----DPQTD SKPPEGLLG FH TDWLT LNVGGRYFTTTTRST-LVNKEP |
| 01:9606 9754 NM_017634 KCTD9 Homo_sapiens              | VLFVCEGEPFI-----DPQTD SKPPEGLLG FH TDWLT LNVGGRYFTTTTRST-LVNKEP |
| 03:9544 9754 NM_001260902 KCTD9 Macaca_mulatta         | VLFVCEGEPFI-----DPQTD SKPPEGLLG FH TDWLT LNVGGRYFTTTTRST-LVNKEP |
| 06:10116 9754 NM_001108871 Kctd9 Rattus_norvegicus     | VLFVCEGEPFI-----DPQTDARPPGGLLGSHTDWLT LNVGGRYFTTTTRST-LVNKEP    |
| 07:10090 9754 NM_001111028 Kctd9 Mus_musculus          | VLFVCEGEPFI-----DPQTDARPPGGLLGSHTDWLT LNVGGRYFTTTTRST-LVNKEP    |
| 07:10090 9754 NM_001285933 Kctd9 Mus_musculus          | -----ILRST-LVNKEP                                               |
| 07:10090 9754 NM_134073 Kctd9 Mus_musculus             | VLFVCEGEPFI-----DPQTDARPPGGLLGSHTDWLT LNVGGRYFTTTTRST-LVNKEP    |
| 08:9031 9754 NM_001012839 KCTD9 Gallus_gallus          | VLFVCEGEPFI-----DPQTDARPHEELTGAHTDWLT LNVGGRYFTTTTRST-LVNKEP    |
| 09:8364 9754 NM_001127016 kctd9 Xenopus_tropicalis     | ILVVEEESDV-----DPMNSFDIPEQLTGGHTDWLT LNVGGRYFTTTTRST-LVSKEP     |
| 12:7227 9754 NM_141208 CG14647 Drosophila_melanogaster | -----AAGDFVAAS--GFAPNRVVKLNVGQIYATTIDT-LVGREP                   |
| 15:3702 9754 NM_117810 FIP2 Arabidopsis_thaliana       | IVLVPKATRLRTH--GKPSGGDFSHSGGGG-----PLKSFGDRNFASHGFKPKNF SKP     |
| 15:3702 9754 NM_124882 FIP2 Arabidopsis_thaliana       | ILSKNEERRNIRRSKLGVEFSSIFLME--TSSNLSSMVRNLNIGGKKFCTTIDT-LTIREP   |
| 15:3702 9754 NM_180862 FIP2 Arabidopsis_thaliana       | ILSKNEERRNIRRSKLGVEFSSIFLME--TSSNLSSMVRNLNIGGKKFCTTIDT-LTIREP   |

```

00:1|Ac-AAHSGPPGGGSAMR
00:2|Ac-AKGGSESWVEWEGGEGR
01:9606|9754|0HNP_060104|KCTD9|Homo_sapiens
01:9606|9754|NM_017634|KCTD9|Homo_sapiens
03:9544|9754|NM_001260902|KCTD9|Macaca_mulatta
06:10116|9754|NM_001108871|Kctd9|Rattus_norvegicus
07:10090|9754|NM_001111028|Kctd9|Mus_musculus
07:10090|9754|NM_001285933|Kctd9|Mus_musculus
07:10090|9754|NM_134073|Kctd9|Mus_musculus
08:9031|9754|NM_001012839|KCTD9|Gallus_gallus
09:8364|9754|NM_001127016|kctd9|Xenopus_tropicalis
12:7227|9754|NM_141208|CG14647|Drosophila_melanogaster
15:3702|9754|NM_117810|FIP2|Arabidopsis_thaliana
15:3702|9754|NM_124882|FIP2|Arabidopsis_thaliana
15:3702|9754|NM_108062|FIP2|Arabidopsis_thaliana

```

```
-----  
NLRG-----ATLAGTDLENCDSLSCDQLQEANLRGSNVKGAI FEEM  
NLRA-----AVLAGADLEKCNLSGSDLQEANLRGANLKDABETLM  
--ME-----KSRMEMELKHCCQMMLSESQQ-----II GA-FAEA  
NLEGANLEGANLKGAKL SNANFKGANLQRAYLRHVNLREAHMEGANLG ANMTGAIR---  
NLEGANLEGANLKGAKL SNANFKGANLQRAYLRHVNLREAVSPKPILGY-----
```

```

00:1|Ac-AAHSGSPSGGSAMR-----
00:2|Ac-AKGGESEWVEGEGR-----
01:9606|9754|0#NP_060104|KCTD9|Homo_sapiens|LTP_LHMSQSVR----
01:9606|9754|NM_017634|KCTD9|Homo_sapiens|LTP_LHMSQSVR----
03:9544|9754|NM_001260902|KCTD9|Macaca_mulatta|LTP_LHMSQSVR----
06:10116|9754|NM_001108871|Kctd9|Rattus_norvegicus|LTP_LHMSQSVR----
07:10090|9754|NM_001111028|Kctd9|Mus_musculus|LTP_LHMSQSVR----
07:10090|9754|NM_001285933|Kctd9|Mus_musculus|LTP_LHMSQSVR----
07:10090|9754|NM_134073|Kctd9|Mus_musculus|LTP_LHMSQSVR----
08:9031|9754|NM_001012839|KCTD9|Gallus_gallus|LTP_LHMSQSVR----
09:8364|9754|NM_001127016|kctd9|Xenopus_tropicalis|LTP_LHMSQSVR----
12:7227|9754|NM_141208|CG14647|Drosophila_melanogaster|VTP_LHMSQAIR----
15:3702|9754|NM_117810|FIP2|Arabidopsis_thaliana|LSEKKSTNARRPVS
15:3702|9754|NM_124882|FIP2|Arabidopsis_thaliana|
15:3702|9754|NM_180862|FIP2|Arabidopsis_thaliana|-----

```

# *MARCH5*

Ac-GDGFAAAAGLRPTPPPLSAIVPGPGLER

CLUSTAL O(1.2.1) multiple sequence alignment

|                                                          |                                                                  |
|----------------------------------------------------------|------------------------------------------------------------------|
| 00:1 Ac-GDGFAAAAGLRPTPPPLSAIVPGPGLER                     | -----                                                            |
| 01:9606 9862 0#NP_060294 MARCH5 Homo_sapiens             | -----                                                            |
| 01:9606 9862 NM_017824 MARCH5 Homo_sapiens               | -----                                                            |
| 03:9544 9862 NM_001261650 MARCH5 Macaca_mulatta          | -----                                                            |
| 04:9913 9862 NM_001034715 MARCH5 Bos_taurus              | RPHRGSSSAGSNSAPAVHGPPEPRADGQEP RPRSSSPRPRLLLLAPHRLRLRTPAGRAPP PP |
| 06:10116 9862 NM_001106372 March5 Rattus_norvegicus      | -----AVHGPPEWADRQEPGRPPPPPGPRLLLLAPRRPLRSPAGCASPPR               |
| 07:10090 9862 NM_001164336 March5 Mus_musculus           | -----LLRRQQLGAPAVHGPPEPWADRQEPGRPPPPPGPRLLLLTPRRPLRSPAGRAAPP R   |
| 07:10090 9862 NM_001164337 March5 Mus_musculus           | -----LLRRQQLGAPAVHGPPEPWADRQEPGRPPPPPGPRLLLLTPRRPLRSPAGRAAPP R   |
| 07:10090 9862 NM_027314 March5 Mus_musculus              | -----LLRRQQLGAPAVHGPPEPWADRQEPGRPPPPPGPRLLLLTPRRPLRSPAGRAAPP R   |
| 08:9031 9862 NM_001012906 MARCH5 Gallus_gallus           | -----LTEA-----PPPFISAPRRLRPRRACVAPSARRVPPA                       |
| 09:8364 9862 NM_001123478 March5 Xenopus_tropicalis      | -----                                                            |
| 10:7955 9862 NM_001082827 March5 Danio_rerio             | -----                                                            |
| 12:7227 9862 NM_001275324 CG9855 Drosophila_melanogaster | -----PKRPITAQQSRVRANE                                            |
| 12:7227 9862 NM_141206 CG9855 Drosophila_melanogaster    | -----PKRPITAQQSRVRANE                                            |
| 00:1 Ac-GDGFAAAAGLRPTPPPLSAIVPGPGLER                     | -----GDGFAA--AAGLRPTPPPL--SAIVPGPGLER-----                       |
| 01:9606 9862 0#NP_060294 MARCH5 Homo_sapiens             | -----MPD                                                         |
| 01:9606 9862 NM_017824 MARCH5 Homo_sapiens               | --RSCPG--KLGDGFAA--AAGLRPTPPPL--SAIVPGPGLERVHWGRPCAPAPRKMPD      |
| 03:9544 9862 NM_001261650 MARCH5 Macaca_mulatta          | -----G--KLGDWFAA--AAGLRPTPLSL--SAIVPGPGLERVHWGGPSAPAPRKMPD       |
| 04:9913 9862 NM_001034715 MARCH5 Bos_taurus              | GSWSRPG--RLGGGFAA--AAGLRPTPPPL--SAIVLGPALTGLT-GEASAPAPPKMPD      |
| 06:10116 9862 NM_001106372 March5 Rattus_norvegicus      | ASGSRAG--RLCGGAEA--AAGLRPTPPPL--SAIVPGPGPERSCGRGPSSPAPQKMPD      |
| 07:10090 9862 NM_001164336 March5 Mus_musculus           | ASGSHAG--RLCGGSA--AAGLRPTPPPL--SAIVPGPGPERGCGRGPSSPAPRKMPD       |
| 07:10090 9862 NM_001164337 March5 Mus_musculus           | ASGSHAG--RLCGGSA--AAGLRPTPPPL--SAIVPGPGPERGCGRGPSSPAPRKMPD       |
| 07:10090 9862 NM_027314 March5 Mus_musculus              | ASGSHAG--RLCGGSA--AAGLRPTPPPL--SAIVPGPGPERGCGRGPSSPAPRKMPD       |
| 08:9031 9862 NM_001012906 MARCH5 Gallus_gallus           | EGGAWRGAASLHGPAFSRRDARLP RPWAPL--S--GRGPSARPA-PSTAGAMSEQTG       |
| 09:8364 9862 NM_001123478 March5 Xenopus_tropicalis      | -----YSSKYGC--GAKGNMSEANS                                        |
| 10:7955 9862 NM_001082827 March5 Danio_rerio             | -----FFY-----SITSAWTHVNMAEEGA                                    |
| 12:7227 9862 NM_001275324 CG9855 Drosophila_melanogaster | MA-DKAAAPSVDC-AAPSVDC-ATPAIPAVEDHTTLTVPPASANKATDASTS---TAVQV     |
| 12:7227 9862 NM_141206 CG9855 Drosophila_melanogaster    | MA-DKAAAPSVDC-AAPSVDC-ATPAIPAVEDHTTLTVPPASANKATDASTS---TAVQV     |
| 00:1 Ac-GDGFAAAAGLRPTPPPLSAIVPGPGLER                     | -----                                                            |
| 01:9606 9862 0#NP_060294 MARCH5 Homo_sapiens             | QALQQLDRSCWVCFATDEDDRTAEWVRPCRCRGSTKWVHQACLQRWVDEK-QRGNSTAR      |
| 01:9606 9862 NM_017824 MARCH5 Homo_sapiens               | QALQQLDRSCWVCFATDEDDRTAEWVRPCRCRGSTKWVHQACLQRWVDEK-QRGNSTAR      |
| 03:9544 9862 NM_001261650 MARCH5 Macaca_mulatta          | QALQQLDRSCWVCFATDEDDRTAEWVRPCRCRGSTKWVHQACLQRWVDEK-QRGNSTAR      |
| 04:9913 9862 NM_001034715 MARCH5 Bos_taurus              | QALQQLDRSCWVCFATDEDDRTAEWVRPCRCRGSTKWVHQACLQRWVDEK-QRGNSTAR      |
| 06:10116 9862 NM_001106372 March5 Rattus_norvegicus      | QALQQLDRSCWVCFATDEDDRTAEWVRPCRCRGSTKWVHQACLQRWVDEK-QRGNSTAR      |
| 07:10090 9862 NM_001164336 March5 Mus_musculus           | QALQQLDRSCWVCFATDEDDRTAEWVRPCRCRGSTKWVHQACLQRWVDEK-QRGNSTAR      |
| 07:10090 9862 NM_001164337 March5 Mus_musculus           | QALQQLDRSCWVCFATDEDDRTAEWVRPCRCRGSTKWVHQACLQRWVDEK-QRGNSTAR      |
| 07:10090 9862 NM_027314 March5 Mus_musculus              | QALQQLDRSCWVCFATDEDDRTAEWVRPCRCRGSTKWVHQACLQRWVDEK-QRGNSTAR      |
| 08:9031 9862 NM_001012906 MARCH5 Gallus_gallus           | LALPQTMDRSCWVCFATDEDDRTAEWVRPCRCRGSTKWVHQACLQRWVDEK-QRGNSTAR     |
| 09:8364 9862 NM_001123478 March5 Xenopus_tropicalis      | VSVQQLDRSCWVCFATDEDDRTAEWVRPCRCRGSTKWVHQACLQRWVDEK-QRGNSTAR      |
| 10:7955 9862 NM_001082827 March5 Danio_rerio             | VVMQQIVDRSCWVCFATDEDDRTAEWVRPCRCRGSTKWVHQACLQRWVDEK-QRGNSTAR     |
| 12:7227 9862 NM_001275324 CG9855 Drosophila_melanogaster | AVDGGEPERCCWICFATDEDNRLAAWVKPCQCRGTTKWVHQSCLYRWIDEKTQKGNALRT     |
| 12:7227 9862 NM_141206 CG9855 Drosophila_melanogaster    | AVDGGEPERCCWICFATDEDNRLAAWVKPCQCRGTTKWVHQSCLYRWIDEKTQKGNALRT     |
| 00:1 Ac-GDGFAAAAGLRPTPPPLSAIVPGPGLER                     | -----                                                            |
| 01:9606 9862 0#NP_060294 MARCH5 Homo_sapiens             | VACPQCNAEYLIVFPKLGPPVYVLDLADRLISKACPFAAAGIMVGSIIYWTAVTYGAVTVM    |
| 01:9606 9862 NM_017824 MARCH5 Homo_sapiens               | VACPQCNAEYLIVFPKLGPPVYVLDLADRLISKACPFAAAGIMVGSIIYWTAVTYGAVTVM    |
| 03:9544 9862 NM_001261650 MARCH5 Macaca_mulatta          | VACPQCNAEYLIVFPKLGPPVYVLDLADRLISKACPFAAAGIMVGSIIYWTAVTYGAVTVM    |
| 04:9913 9862 NM_001034715 MARCH5 Bos_taurus              | VACPQCNAEYLIVFPKLGPPVYVLDLADRLISKACPFAAAGIMVGSIIYWTAVTYGAVTVM    |
| 06:10116 9862 NM_001106372 March5 Rattus_norvegicus      | VACPQCNAEYLIVFPKLGPPVYVLDLADRLISKACPFAAAGIMVGSIIYWTAVTYGAVTVM    |
| 07:10090 9862 NM_001164336 March5 Mus_musculus           | VACPQCNAEYLIVFPKLGPPVYVLDLADRLISKACPFAAAGIMVGSIIYWTAVTYGAVTVM    |
| 07:10090 9862 NM_001164337 March5 Mus_musculus           | VACPQCNAEYLIVFPKLGPPVYVLDLADRLISKACPFAAAGIMVGSIIYWTAVTYGAVTVM    |
| 07:10090 9862 NM_027314 March5 Mus_musculus              | VACPQCNAEYLIVFPKLGPPVYVLDLADRLISKACPFAAAGIMVGSIIYWTAVTYGAVTVM    |
| 08:9031 9862 NM_001012906 MARCH5 Gallus_gallus           | VACPQCNAEYLIVFPKLGPPVYVLDLADRLISKACPFAAAGIMVGSIIYWTAVTYGAVTVM    |
| 09:8364 9862 NM_001123478 March5 Xenopus_tropicalis      | VACPQCNAEYLIVFPKLGPPVYVLDLADRLISKACPFAAAGIMVGSIIYWTAVTYGAVTVM    |
| 10:7955 9862 NM_001082827 March5 Danio_rerio             | VACPQCNAEYLIVFPKLGPPVYVLDLADRLISKACPFAAAGIMVGSIIYWTAVTYGAVTVM    |
| 12:7227 9862 NM_001275324 CG9855 Drosophila_melanogaster | VSCPQCQTEYIIIVFPQMGLGGALEAIDNLIKRLSPFLAAGFFVGSlyWTAVTYGAVTFL     |
| 12:7227 9862 NM_141206 CG9855 Drosophila_melanogaster    | VSCPQCQTEYIIIVFPQMGLGGALEAIDNLIKRLSPFLAAGFFVGSlyWTAVTYGAVTFL     |
| 00:1 Ac-GDGFAAAAGLRPTPPPLSAIVPGPGLER                     | -----                                                            |
| 01:9606 9862 0#NP_060294 MARCH5 Homo_sapiens             | QVVGHKEGLDVMERADPLFLLLIGLPTIPVMLILGKMIRWEDYVLRRLWRKYSNK---LQIL   |
| 01:9606 9862 NM_017824 MARCH5 Homo_sapiens               | QVVGHKEGLDVMERADPLFLLLIGLPTIPVMLILGKMIRWEDYVLRRLWRKYSNK---LQIL   |
| 03:9544 9862 NM_001261650 MARCH5 Macaca_mulatta          | QVVGHKEGLDVMERADPLFLLLIGLPTIPVMLILGKMIRWEDYVLRRLWRKYSNK---LQIL   |
| 04:9913 9862 NM_001034715 MARCH5 Bos_taurus              | QVVGHKEGLDVMERADPLFLLLIGLPTIPVMLILGKMIRWEDYVLRRLWRKYSNK---LQIL   |
| 06:10116 9862 NM_001106372 March5 Rattus_norvegicus      | QVVGHKEGLDVMERADPLFLLLIGLPTIPVMLILGKMIRWEDYVLRRLWRKYSNK---LQIL   |
| 07:10090 9862 NM_001164336 March5 Mus_musculus           | QVVGHKEGLDVMERADPLFLLLIGLPTIPVMLILGKMIRWEDYVLRRLWRKYSNK---LQIL   |
| 07:10090 9862 NM_001164337 March5 Mus_musculus           | QVVGHKEGLDVMERADPLFLLLIGLPTIPVMLILGKMIRWEDYVLRRLWRKYSNK---LQIL   |
| 07:10090 9862 NM_027314 March5 Mus_musculus              | QVVGHKEGLDVMERADPLFLLLIGLPTIPVMLILGKMIRWEDYVLRRLWRKYSNK---LQIL   |
| 08:9031 9862 NM_001012906 MARCH5 Gallus_gallus           | QVVGHKEGLDVMERADPLFLLLIGLPTIPVMLILGKMIRWEDYVLRRLWRKYSNK---LQIL   |
| 09:8364 9862 NM_001123478 March5 Xenopus_tropicalis      | QVVGHKEGLDVMERADPLFLLLIGLPTIPVMLILGKMIRWEDYVLRRLWRKYSNK---LQIL   |
| 10:7955 9862 NM_001082827 March5 Danio_rerio             | QVVGHKEGLDVMERADPLFLLLIGLPTIPVMLILGKMIRWEDYVLRRLWRKYSNK---LQIL   |
| 12:7227 9862 NM_001275324 CG9855 Drosophila_melanogaster | QIVGHEHGMSIMESGDPLVLLIGLPAIPVGLVLGRLIRWEDALLRLIRNRGTVVRKFPFV     |
| 12:7227 9862 NM_141206 CG9855 Drosophila_melanogaster    | QIVGHEHGMSIMESGDPLVLLIGLPAIPVGLVLGRLIRWEDALLRLIRNRGTVVRKFPFV     |
| 00:1 Ac-GDGFAAAAGLRPTPPPLSAIVPGPGLER                     | -----                                                            |
| 01:9606 9862 0#NP_060294 MARCH5 Homo_sapiens             | NSIFPGIGCPVRI---PAEANPLADHVSATRILCGALVFPTIATIVGKLMFSSVNSNLQ      |
| 01:9606 9862 NM_017824 MARCH5 Homo_sapiens               | NSIFPGIGCPVRI---PAEANPLADHVSATRILCGALVFPTIATIVGKLMFSSVNSNLQ      |

03:9544|9862|NM\_001261650|MARCH5|Macaca\_mulatta  
04:9913|9862|NM\_001034715|MARCH5|Bos\_taurus  
06:10116|9862|NM\_001106372|March5|Rattus\_norvegicus  
07:10090|9862|NM\_001164336|March5|Mus\_musculus  
07:10090|9862|NM\_001164337|March5|Mus\_musculus  
07:10090|9862|NM\_027314|March5|Mus\_musculus  
08:9031|9862|NM\_001012906|MARCH5|Gallus\_gallus  
09:8364|9862|NM\_001123478|march5|Xenopus\_tropicalis  
10:7955|9862|NM\_001082827|march5|Danio\_rerio  
12:7227|9862|NM\_001275324|CG9855|Drosophila\_melanogaster  
12:7227|9862|NM\_141206|CG9855|Drosophila\_melanogaster

00:1|Ac-GDGFAAAAGLRPTPPPLSAIVPGPLER  
01:9606|9862|0#NP\_060294|MARCH5|Homo\_sapiens  
01:9606|9862|NM\_017824|MARCH5|Homo\_sapiens  
03:9544|9862|NM\_001261650|MARCH5|Macaca\_mulatta  
04:9913|9862|NM\_001034715|MARCH5|Bos\_taurus  
06:10116|9862|NM\_001106372|March5|Rattus\_norvegicus  
07:10090|9862|NM\_001164336|March5|Mus\_musculus  
07:10090|9862|NM\_001164337|March5|Mus\_musculus  
07:10090|9862|NM\_027314|March5|Mus\_musculus  
08:9031|9862|NM\_001012906|MARCH5|Gallus\_gallus  
09:8364|9862|NM\_001123478|march5|Xenopus\_tropicalis  
10:7955|9862|NM\_001082827|march5|Danio\_rerio  
12:7227|9862|NM\_001275324|CG9855|Drosophila\_melanogaster  
12:7227|9862|NM\_141206|CG9855|Drosophila\_melanogaster

00:1|Ac-GDGFAAAAGLRPTPPPLSAIVPGPLER  
01:9606|9862|0#NP\_060294|MARCH5|Homo\_sapiens  
01:9606|9862|NM\_017824|MARCH5|Homo\_sapiens  
03:9544|9862|NM\_001261650|MARCH5|Macaca\_mulatta  
04:9913|9862|NM\_001034715|MARCH5|Bos\_taurus  
06:10116|9862|NM\_001106372|March5|Rattus\_norvegicus  
07:10090|9862|NM\_001164336|March5|Mus\_musculus  
07:10090|9862|NM\_001164337|March5|Mus\_musculus  
07:10090|9862|NM\_027314|March5|Mus\_musculus  
08:9031|9862|NM\_001012906|MARCH5|Gallus\_gallus  
09:8364|9862|NM\_001123478|march5|Xenopus\_tropicalis  
10:7955|9862|NM\_001082827|march5|Danio\_rerio  
12:7227|9862|NM\_001275324|CG9855|Drosophila\_melanogaster  
12:7227|9862|NM\_141206|CG9855|Drosophila\_melanogaster

NSIFPGIGCPVPRI---PAEANPLADHVSATRILCGALVFPTIATIVGKLMFSSVNSNLQ  
NSIFPGIGCPVPRI---PAEANPLADHVSATRILCGALVFPTIATIVGKLMFSSVNSNLQ  
NSIFPGIGCPVPRI---PAEANPLADHVSATRILCGALVFPTIATIVGKLMFSSVNSNLQ  
NSIFPGIGCPVPRI---PAEANPLADHVSATRILCGALVFPTIATIVGKLMFSSVNSNLQ  
-----  
NSIFPGIGCPVPRI---PAEANPLADHVSATRILCGALVFPTIATIVGKLMFSSVNSNLQ  
NSIFPGIGCPVPRI---PAEANPLADHVSATRILCGALVFPTIATIVGKLMFSSVNSNLQ  
NSIFPGIGCPVPRI---PAEANPLADHVSATRILCGALVFPTIATIVGKLMFSSVNSNLQ  
NSIFPGIGCPVPRI---PAEANPLADHVSATRILCGALVFPTIATIVGKLMFSSVNSNLQ  
NSIFPGIGCPVPRI---PAEANPLADHVSATRILCGALVFPTIATIVGKLMFSSVNSNLQ  
SLIYPNLSQEEEQQSISNPATPALSDPVSATRVFCGALLLPTISSIVGRILFDTVDNTLH  
SLIYPNLSQEEEQQSISNPATPALSDPVSATRVFCGALLLPTISSIVGRILFDTVDNTLH

-----  
RTILGGIAFVAIKGAFKVYFKQQQYLRQAHRKILNYPEQEEA-----  
RTILGGIAFVAIKGAFKVYFKQQQYLRQAHRKILNYPEQEEA-----  
RTILGGIAFVAIKGAFKVYFKQQQYLRQAHRKILNYPEQEEA-----  
RTILGGIAFVAIKGAFKVYFKQQQYLRQAHRKILNYPEQEEA-----  
RTILGGIAFVAIKGAFKVYFKQQQYLRQAHRKILNYPEQEEA-----  
RTILVRWI-----  
-----  
RTILGGIAFVAIKGAFKVYFKQQQYLRQAHRKILNYPEQEEA-----  
RTILGGIAFVAIKGAFKVYFKQQQYLRQAHRKILNYPEQEEA-----  
RTILGGIAFVAIKGAFKVYFKQQQYLRQAHRKILNYPEQEEA-----  
RTILGGIAFVAIKGAFKVYFKQQQYLRQAHRKILNYPEQEEA-----  
RTILGGIAFVAIKGAFKVYFKQQQYLRQAHRKILNYPEQEEA-----  
RTLLGGLTFITVKGILKIYLKQKQYGRKKRRIVDYTEENIRNFMHRNNNSAAAAAQERL  
RTLLGGLTFITVKGILKIYLKQKQYGRKKRRIVDYTEENIRNFMHRNNNSAAAAAQERL

-----  
-----  
-----  
-----  
-----  
-----  
-----  
-----  
-----  
-----  
-----  
-----  
-----  
-----  
-----  
-----  
-----  
-----  
PEQRPVPPAERRDAVITRQRGDSGGSVV  
PEQRPVPPAERRDAVITRQRGDSGGSVV

*INTS8*

Ac-MEPGSGPGGSGGGGR

CLUSTAL O(1.2.1) multiple sequence alignment

|                         |      |                                         |  |                                                                |  |  |  |
|-------------------------|------|-----------------------------------------|--|----------------------------------------------------------------|--|--|--|
| 00:1 Ac-MEPGSGPGGSGGGGR |      |                                         |  | -----MSAEAADREAATSSRPCT                                        |  |  |  |
| 01:9606                 | 9888 | 0#NP_060334 INTS8 Homo_sapiens          |  | VSGTGGWPLSHRVPHTPGTGPHPSVRLEPGSGGGGGRMSAEAADREAATSSRPCT        |  |  |  |
| 01:9606                 | 9888 | NM_017864 INTS8 Homo_sapiens            |  | -----RMSAEAADREAATSSRPCT                                       |  |  |  |
| 04:9913                 | 9888 | NM_001102556 INTS8 Bos_taurus           |  | -----RDWARVRLEPGG-GGSSGGGGRMSAEAADREAATSSRPCT                  |  |  |  |
| 07:10090                | 9888 | NM_001159595 Ints8 Mus_musculus         |  | -----RDWARVRLEPGG-GGSSGGGGRMSAEAADREAATSSRPCT                  |  |  |  |
| 07:10090                | 9888 | NM_178112 Ints8 Mus_musculus            |  | -----PPSPRAGAVSAVSVGARGAAAMSAEADREAATSSRPCT                    |  |  |  |
| 08:9031                 | 9888 | NM_001040228 INTS8 Gallus_gallus        |  | -----SF IHR--GKSGVPD-----QMKKKNSSSDKLGKKMSAEADREAATSSRPCT      |  |  |  |
| 09:8364                 | 9888 | NM_001097404 ints8 Xenopus_tropicalis   |  | ---YLGDFYI ILTYTS-----NSLLCLPGFSYLFKRRQVVMMSAEADREAVTSGSRPCT   |  |  |  |
| 10:7955                 | 9888 | NM_001020756 ints8 Danio_rerio          |  | -----ILAGISMDPLKPKPVPLA                                        |  |  |  |
| 12:7227                 | 9888 | NM_137318 IntS8 Drosophila_melanogaster |  |                                                                |  |  |  |
| 00:1 Ac-MEPGSGPGGSGGGGR |      |                                         |  |                                                                |  |  |  |
| 01:9606                 | 9888 | 0#NP_060334 INTS8 Homo_sapiens          |  | PPQTCWFEFLLEESLLEKHLRKPCDPAPVQLIVQFLEQASKPS-----VNEQNQVQ       |  |  |  |
| 01:9606                 | 9888 | NM_017864 INTS8 Homo_sapiens            |  | PPQTCWFEFLLEESLLEKHLRKPCDPAPVQLIVQFLEQASKPS-----VNEQNQVQ       |  |  |  |
| 04:9913                 | 9888 | NM_001102556 INTS8 Bos_taurus           |  | PPQTSWFEFLQESLLEKHLRKPCDPAPVQLIVQFLEQASKPS-----VNEQNQVQ        |  |  |  |
| 07:10090                | 9888 | NM_001159595 Ints8 Mus_musculus         |  | PPQTCWFEFLLEESLLEKHLRKACDPAPVQLIVQFLEQASKPS-----VNEQNQVQ       |  |  |  |
| 07:10090                | 9888 | NM_178112 Ints8 Mus_musculus            |  | PPQTCWFEFLLEESLLEKHLRKACDPAPVQLIVQFLEQASKPS-----VNEQNQVQ       |  |  |  |
| 08:9031                 | 9888 | NM_001040228 INTS8 Gallus_gallus        |  | PPQTSWFEFLLEEDLLEKHLRKPSDPPVQLIVQFLEQASKPS-----VNEQNQVQ        |  |  |  |
| 09:8364                 | 9888 | NM_001097404 ints8 Xenopus_tropicalis   |  | PPQTSWFEFLDLSLLEKHLKQSDSDPPVQLIVQFLEQASKPS-----LNEQNQVQ        |  |  |  |
| 10:7955                 | 9888 | NM_001020756 ints8 Danio_rerio          |  | PPQTSWFEFLNPSLLEQHLHSPHPDPSPVQLIFQFLEQASKPS-----VNEQNQVQ       |  |  |  |
| 12:7227                 | 9888 | NM_137318 IntS8 Drosophila_melanogaster |  | AETVLWFEFLDPHKITQHLQRPHPEPSAMELIVQFISMTPTNTAQESVGTGPGSDLQNLNQ  |  |  |  |
| 00:1 Ac-MEPGSGPGGSGGGGR |      |                                         |  |                                                                |  |  |  |
| 01:9606                 | 9888 | 0#NP_060334 INTS8 Homo_sapiens          |  | PP-----PDNKRNRILKLLALKVAAH                                     |  |  |  |
| 01:9606                 | 9888 | NM_017864 INTS8 Homo_sapiens            |  | PP-----PDNKRNRILKLLALKVAAH                                     |  |  |  |
| 04:9913                 | 9888 | NM_001102556 INTS8 Bos_taurus           |  | PP-----PDNKRNRVLKLLALKVAAH                                     |  |  |  |
| 07:10090                | 9888 | NM_001159595 Ints8 Mus_musculus         |  | PP-----PDNKRNRVLKLLALKVAAH                                     |  |  |  |
| 07:10090                | 9888 | NM_178112 Ints8 Mus_musculus            |  | PP-----PDNKRNRVLKLLALKVAAH                                     |  |  |  |
| 08:9031                 | 9888 | NM_001040228 INTS8 Gallus_gallus        |  | PP-----PDNKRNRILKLLALKVAAH                                     |  |  |  |
| 09:8364                 | 9888 | NM_001097404 ints8 Xenopus_tropicalis   |  | PP-----TDNKRNRITLKLALKVAAV                                     |  |  |  |
| 10:7955                 | 9888 | NM_001020756 ints8 Danio_rerio          |  | PP-----VDNRRNRITLKLALKVAAH                                     |  |  |  |
| 12:7227                 | 9888 | NM_137318 IntS8 Drosophila_melanogaster |  | TPSNSGPIPGVVGAPAPTTPTASGGVGMPHSPQRPAEKLQLNRKQLALKILELKVATW     |  |  |  |
| 00:1 Ac-MEPGSGPGGSGGGGR |      |                                         |  |                                                                |  |  |  |
| 01:9606                 | 9888 | 0#NP_060334 INTS8 Homo_sapiens          |  | LKWDLDILEKSLSVPLNMMLNELLCSISKVP----PGTKHVDMD--LATLPPTTAMAVLL   |  |  |  |
| 01:9606                 | 9888 | NM_017864 INTS8 Homo_sapiens            |  | LKWDLDILEKSLSVPLNMMLNELLCSISKVP----PGTKHVDMD--LATLPPTTAMAVLL   |  |  |  |
| 04:9913                 | 9888 | NM_001102556 INTS8 Bos_taurus           |  | LKWDLDILEKSLSVPLNMMLNELLCSISKVP----PGTKHIDMD--LATLPPTTAMAILL   |  |  |  |
| 07:10090                | 9888 | NM_001159595 Ints8 Mus_musculus         |  | LKWDLDILEKSLSVPLNMMLNELLCSISKVP----PGTKHVDMD--LSALPPTTAMAILL   |  |  |  |
| 07:10090                | 9888 | NM_178112 Ints8 Mus_musculus            |  | LKWDLDILEKSLSVPLNMMLNELLCSISKVP----PGTKHVDMD--LSALPPTTAMAILL   |  |  |  |
| 08:9031                 | 9888 | NM_001040228 INTS8 Gallus_gallus        |  | LKWDLDVLEKSLSVPLNMMLNELLCSISKVP----PGTKHVDVD--LSSLPPTTAMAILL   |  |  |  |
| 09:8364                 | 9888 | NM_001097404 ints8 Xenopus_tropicalis   |  | LKNWLDVLEKSLSVPLNMMLNELLCSISKVP----PGTKHVDLD--LSTLPPTTVMAVTL   |  |  |  |
| 10:7955                 | 9888 | NM_001020756 ints8 Danio_rerio          |  | LRWDLNMLEKGLTIPVPLNMMLNELLCSVSHVP----PGVKHVDLD--LSSLPPTTAMAVVF |  |  |  |
| 12:7227                 | 9888 | NM_137318 IntS8 Drosophila_melanogaster |  | LKWDLDALKEKNLPVIMQLALLRDLCTISYGCSLSIPLPNDFDARISAAGNERAARFALTI  |  |  |  |
| 00:1 Ac-MEPGSGPGGSGGGGR |      |                                         |  |                                                                |  |  |  |
| 01:9606                 | 9888 | 0#NP_060334 INTS8 Homo_sapiens          |  | YNRWAIRTIVQSSFPVKQAKPGPPQLSVNMNMQQKEKELTENILKVLKEQAADSILVLEAA  |  |  |  |
| 01:9606                 | 9888 | NM_017864 INTS8 Homo_sapiens            |  | YNRWAIRTIVQSSFPVKQAKPGPPQLSVNMNMQQKEKELTENILKVLKEQAADSILVLEAA  |  |  |  |
| 04:9913                 | 9888 | NM_001102556 INTS8 Bos_taurus           |  | YNRWAIRTIVQSSFPVKQAKPGPPQLSVNMNMQQKEKELTENILKVLKEQASDSILVLEAA  |  |  |  |
| 07:10090                | 9888 | NM_001159595 Ints8 Mus_musculus         |  | YNRWAIRTIVQSSFPVKQAKPGPPQLSVNMNMQQKEKELTENILKVLKEQAADCILVLEAA  |  |  |  |
| 07:10090                | 9888 | NM_178112 Ints8 Mus_musculus            |  | YNRWAIRTIVQSSFPVKQAKPGPPQLSVNMNMQQKEKELTENILKVLKEQAADCILVLEAA  |  |  |  |
| 08:9031                 | 9888 | NM_001040228 INTS8 Gallus_gallus        |  | YNRWAIRTIVKSSFPVKQVKGPPQLNVNMNMQQKEKELTENILKVLKEQAADSILVLEGA   |  |  |  |
| 09:8364                 | 9888 | NM_001097404 ints8 Xenopus_tropicalis   |  | YNRWAIRTIVKSSFPVKQVKGPPQLNVMNSQIQEKEKELTENILKVLKEQAEDSITVLERA  |  |  |  |
| 10:7955                 | 9888 | NM_001020756 ints8 Danio_rerio          |  | YNRWAIRTIVLSSFPKEQTKPGPHQLNMNMMLQQEKEHTENILSVLREQATDSIVVLEGA   |  |  |  |
| 12:7227                 | 9888 | NM_137318 IntS8 Drosophila_melanogaster |  | YHRMLLRMQLIKEQALKAPRPQNTMYQTVDQLQQ-----FLDTPTQPSIEYLQQL        |  |  |  |
| 00:1 Ac-MEPGSGPGGSGGGGR |      |                                         |  |                                                                |  |  |  |
| 01:9606                 | 9888 | 0#NP_060334 INTS8 Homo_sapiens          |  | LKLNKDLYVHTMRTLDDLAMEPGMVNGETESSTAGLKVKTEEMQCQVCYDLGAAYFQQGS   |  |  |  |
| 01:9606                 | 9888 | NM_017864 INTS8 Homo_sapiens            |  | LKLNKDLYVHTMRTLDDLAMEPGMVNGETESSTAGLKVKTEEMQCQVCYDLGAAYFQQGS   |  |  |  |
| 04:9913                 | 9888 | NM_001102556 INTS8 Bos_taurus           |  | LKLNKDLYVHTMRTLDDLAVEPGMVNGETESSTAGLKIKTEEMQCQVCYDLGAAYFQQGS   |  |  |  |
| 07:10090                | 9888 | NM_001159595 Ints8 Mus_musculus         |  | LRLNKDLYVHTMRTLDDLAVEPGTVNGETENSTAGLKIRTEEMQCQVCYDLGAAYFQQGS   |  |  |  |
| 07:10090                | 9888 | NM_178112 Ints8 Mus_musculus            |  | LRLNKDLYVHTMRTLDDLAVEPGTVNGETENSTAGLKIRTEEMQCQVCYDLGAAYFQQGS   |  |  |  |
| 08:9031                 | 9888 | NM_001040228 INTS8 Gallus_gallus        |  | LKLNKDLYVHTIRTLDLLAMEPGMVNGETESSTAGLKISAEELQCQVCYDLGAIYFQQGA   |  |  |  |
| 09:8364                 | 9888 | NM_001097404 ints8 Xenopus_tropicalis   |  | LQLKRDFYVHTMRTLDDLAVEPGMVNGETENSTAGLKISFEEMQCQGCYDLGTVYFQQGP   |  |  |  |
| 10:7955                 | 9888 | NM_001020756 ints8 Danio_rerio          |  | LSIKKDFYIHTLRTLDDLADPSTTNGETEYTAGLRISFDHLHCQVHYDLGGYFQQGC      |  |  |  |
| 12:7227                 | 9888 | NM_137318 IntS8 Drosophila_melanogaster |  | CASTKPFYIFHYDSFVPLRCCD--IGNQYNDVMHLITPQELRAQLHYELAQYYLYTKQ     |  |  |  |
| 00:1 Ac-MEPGSGPGGSGGGGR |      |                                         |  |                                                                |  |  |  |
| 01:9606                 | 9888 | 0#NP_060334 INTS8 Homo_sapiens          |  | TNSAVYENAREKFFRTKE--LIAEIGSLSLHCTIDEKRLAGYCAQCDVLVPSSDSTSQQ    |  |  |  |
| 01:9606                 | 9888 | NM_017864 INTS8 Homo_sapiens            |  | TNSAVYENAREKFFRTKE--LIAEIGSLSLHCTIDEKRLAGYCAQCDVLVPSSDSTSQQ    |  |  |  |
| 04:9913                 | 9888 | NM_001102556 INTS8 Bos_taurus           |  | TNPAYYENAREKFFRTKE--LIAEIGSLSLHCTIDEKRLAGYCAQCDVLVPSSDSTSQQ    |  |  |  |
| 07:10090                | 9888 | NM_001159595 Ints8 Mus_musculus         |  | TDSAIYENAREKFFRTKE--LLAEIGSLSLHCTIDEKRLAGYCAQCDVLVPSSDNNSSQ    |  |  |  |
| 07:10090                | 9888 | NM_178112 Ints8 Mus_musculus            |  | TDSAIYENAREKFFRTKE--LLAEIGSLSLHCTIDEKRLAGYCAQCDVLVPSSDNNSSQ    |  |  |  |
| 08:9031                 | 9888 | NM_001040228 INTS8 Gallus_gallus        |  | TNAALHENAKEKFFKTKE--LIAKIGSSSLHCTIDEKRLAGYCAQCGVLTSSDDASQQT    |  |  |  |
| 09:8364                 | 9888 | NM_001097404 ints8 Xenopus_tropicalis   |  | TNSSCYEKARDHFFRTKQ--LVSKIGAASDHCSIIDEKRLAGYCEACGVLAPSNV-VTEPA  |  |  |  |
| 10:7955                 | 9888 | NM_001020756 ints8 Danio_rerio          |  | SDTSVYEKAREHFRKARE--LITKLDFSASFCCLEQRLAGYSACRTLTGTSDLNESQH     |  |  |  |
| 12:7227                 | 9888 | NM_137318 IntS8 Drosophila_melanogaster |  | -----YVLAREAAAAACNTNLQAIPPQTTLYYCHIRPSELEGLQACGISAEQSLLEKFQ    |  |  |  |

00:1|Ac-MEPGSGPGSGGGGGR  
01:9606|9888|0#NP\_060334|INTS8|Homo\_sapiens  
01:9606|9888|NM\_017864|INTS8|Homo\_sapiens  
04:9913|9888|NM\_001102556|INTS8|Bos\_taurus  
07:10090|9888|NM\_001159595|Ints8|Mus\_musculus  
07:10090|9888|NM\_178112|Ints8|Mus\_musculus  
08:9031|9888|NM\_001040228|INTS8|Gallus\_gallus  
09:8364|9888|NM\_001097404|ints8|Xenopus\_tropicalis  
10:7955|9888|NM\_001020756|ints8|Danio\_rerio  
12:7227|9888|NM\_137318|IntS8|Drosophila\_melanogaster

00:1|Ac-MEPGSGPGSGGGGGR  
01:9606|9888|0#NP\_060334|INTS8|Homo\_sapiens  
01:9606|9888|NM\_017864|INTS8|Homo\_sapiens  
04:9913|9888|NM\_001102556|INTS8|Bos\_taurus  
07:10090|9888|NM\_001159595|Ints8|Mus\_musculus  
07:10090|9888|NM\_178112|Ints8|Mus\_musculus  
08:9031|9888|NM\_001040228|INTS8|Gallus\_gallus  
09:8364|9888|NM\_001097404|ints8|Xenopus\_tropicalis  
10:7955|9888|NM\_001020756|ints8|Danio\_rerio  
12:7227|9888|NM\_137318|IntS8|Drosophila\_melanogaster

00:1|Ac-MEPGSGPGSGGGGGR  
01:9606|9888|0#NP\_060334|INTS8|Homo\_sapiens  
01:9606|9888|NM\_017864|INTS8|Homo\_sapiens  
04:9913|9888|NM\_001102556|INTS8|Bos\_taurus  
07:10090|9888|NM\_001159595|Ints8|Mus\_musculus  
07:10090|9888|NM\_178112|Ints8|Mus\_musculus  
08:9031|9888|NM\_001040228|INTS8|Gallus\_gallus  
09:8364|9888|NM\_001097404|ints8|Xenopus\_tropicalis  
10:7955|9888|NM\_001020756|ints8|Danio\_rerio  
12:7227|9888|NM\_137318|IntS8|Drosophila\_melanogaster

00:1|Ac-MEPGSGPGSGGGGGR  
01:9606|9888|0#NP\_060334|INTS8|Homo\_sapiens  
01:9606|9888|NM\_017864|INTS8|Homo\_sapiens  
04:9913|9888|NM\_001102556|INTS8|Bos\_taurus  
07:10090|9888|NM\_001159595|Ints8|Mus\_musculus  
07:10090|9888|NM\_178112|Ints8|Mus\_musculus  
08:9031|9888|NM\_001040228|INTS8|Gallus\_gallus  
09:8364|9888|NM\_001097404|ints8|Xenopus\_tropicalis  
10:7955|9888|NM\_001020756|ints8|Danio\_rerio  
12:7227|9888|NM\_137318|IntS8|Drosophila\_melanogaster

00:1|Ac-MEPGSGPGSGGGGGR  
01:9606|9888|0#NP\_060334|INTS8|Homo\_sapiens  
01:9606|9888|NM\_017864|INTS8|Homo\_sapiens  
04:9913|9888|NM\_001102556|INTS8|Bos\_taurus  
07:10090|9888|NM\_001159595|Ints8|Mus\_musculus  
07:10090|9888|NM\_178112|Ints8|Mus\_musculus  
08:9031|9888|NM\_001040228|INTS8|Gallus\_gallus  
09:8364|9888|NM\_001097404|ints8|Xenopus\_tropicalis  
10:7955|9888|NM\_001020756|ints8|Danio\_rerio  
12:7227|9888|NM\_137318|IntS8|Drosophila\_melanogaster

00:1|Ac-MEPGSGPGSGGGGGR  
01:9606|9888|0#NP\_060334|INTS8|Homo\_sapiens  
01:9606|9888|NM\_017864|INTS8|Homo\_sapiens  
04:9913|9888|NM\_001102556|INTS8|Bos\_taurus  
07:10090|9888|NM\_001159595|Ints8|Mus\_musculus  
07:10090|9888|NM\_178112|Ints8|Mus\_musculus  
08:9031|9888|NM\_001040228|INTS8|Gallus\_gallus  
09:8364|9888|NM\_001097404|ints8|Xenopus\_tropicalis  
10:7955|9888|NM\_001020756|ints8|Danio\_rerio  
12:7227|9888|NM\_137318|IntS8|Drosophila\_melanogaster

00:1|Ac-MEPGSGPGSGGGGGR  
01:9606|9888|0#NP\_060334|INTS8|Homo\_sapiens  
01:9606|9888|NM\_017864|INTS8|Homo\_sapiens  
04:9913|9888|NM\_001102556|INTS8|Bos\_taurus  
07:10090|9888|NM\_001159595|Ints8|Mus\_musculus  
07:10090|9888|NM\_178112|Ints8|Mus\_musculus  
08:9031|9888|NM\_001040228|INTS8|Gallus\_gallus  
09:8364|9888|NM\_001097404|ints8|Xenopus\_tropicalis  
10:7955|9888|NM\_001020756|ints8|Danio\_rerio  
12:7227|9888|NM\_137318|IntS8|Drosophila\_melanogaster

00:1|Ac-MEPGSGPGSGGGGGR

-----  
TPYSQVHICLRSGNYQEVIQIFIEDNLTLSLPVQFRQSVLRELFFKKAQQGNE-ALDEICF  
TPYSQVHICLRSGNYQEVIQIFIEDNLTLSLPVQFRQSVLRELFFKKAQQGNE-ALDEICF  
TPYSQVHICLRSGNYQEVIKIFVEDNLTFSLPQIFRQSVLRELFFQKAQQGNE-ALDEICF  
TPYSQVHICLRSGSYQEVVQIFIEDNLTFTLPVQFRQSVLRELFFQKAQQGNE-ALDEICF  
TPYSQVHICLRSGSYQEVVQIFIEDNLTFTLPVQFRQSVLRELFFQKAQQGNE-ALDEICF  
TPYNQIHNCKMSGNYQDLVKIFLEDNLALSLPVQFRQSVLRELFFQKAQQGND-ALDEVCF  
TPYSQIHSFMKTSYQGILKIFLEDNLNNSLPDQFRQSVLRELFFQKAQQGNG-ALAEVCF  
TPYGQISCFMRNHYGALIEEFICDNVTLSLPNSFRHSIQLBLMHKLQQGDS-ALAEVCN  
-----QSLNNYTDIVSILRMDNRRREIPFISRRQVELDIEGSISTGILKETVQLQL

-----  
KVCACNTVRDILEGRTISVQF--NQL----FLRPNKEKIDFLLVCSRSVNLEKASESL  
KVCACNTVRDILEGRTISVQF--NQL----FLRPNKEKIDFLLVCSRSVNLEKASESL  
KVCACNTVRDVLBGRITISVQF--NQL----FLRPNKEKIDFLLVCSRSINLEKASDTL  
KICVCNTVRDVLBGRITISVQF--NQL----FLRPNKEKIDFLLVCSRSINVEKASDSL  
KICVCNTVRDVLBGRITISVQF--NQL----FLRPNKEKIDFLLVCSRSINVEKASDSL  
KICVCNTVCDVLQGGQIIDIQF--CQL----FLKPNKEKIDFLLVCSRSINLETASESL  
KVCACNTVCDIVHGRPITVQF--HQL----FMRPSKEKIDFLLVCSRSMLSEQTSEAS  
KLCVCNAVRDALEGGILSVSF--HQL----LLKPSKNIISFLLVCTRSLEKENLPELS  
QVAALNVVRNIFEWGSIFGSVEYFEKYRELDCLPLLEALQEMLPHCTFKE-----

-----  
KGNMAAFLKNVCLGLE--DLQYVFMISSEHLEFITLLKDEERKLLVDQMRKRSRPRV-NLCI  
KGNMAAFLKNVCLGLE--DLQYVFMISSEHLEFITLLKDEERKLLVDQMRKRSRPRV-NLCI  
KGNMAAFLKNVCLGLE--DLQYVFMISSEHLEFITLLKDEERKLLVDQMRKRSRPRV-NLCI  
KGNMAAFLKNVCLGLE--DLQYVFMISSEHLEFITLLKDEERKLLVDQMRKRSRPRV-NLCI  
KGNMAAFLKNVCLGLE--DLQYVFMISSEHLEFITLLKDEERKLLVDQMRKRSRPRV-NLCI  
KRKMAAFLKNLCLGLE--DLQLVFMISSEHLEFIKLLKDDERKLLVDQMRKRSRLRI-NLST  
KRKIATFLKNLCLIEI--DLQLVFMISSEHLEFIMKMLTDEESKMVVEHIRKKTSTRV-SLCT  
KSKMALFIKTVCDQLG--DVSLAFMVSSHKLKFELLQEEKKILMEQMRKSSDVI-NLSS  
QAALKHFLIDCLLHQGGQSRQLLTQVRGFGFLF----SDELQDIDEQMLQATPPVPTNSL

-----  
KPVTSFYDIPASASVNIQLEHQILILSVDPWRIRQILIELHGMTSERQFWTVSNKWEVPS  
KPVTSFYDIPASASVNIQLEHQILILSVDPWRIRQILIELHGMTSERQFWTVSNKWEVPS  
KPVTSFYDIPASASVNIQLEHQILILSVDPWRIRQILIELHGMTSEREFWTVSNKWELPL  
KPVTSFYDIPASASVNIQLEHQILILSVDPWRIRQILIELHGMTSERQFWTVSNKWEVPS  
KPVTSFYDIPASASVNIQLEHQILILSVDPWRIRQILIELHGMTSERQFWTVSNKWEVPS  
KPVTSFYDIPASASVNIQLEHQILILSVDPWRIRQILIELHGMTSERQFWTISNKWEVPS  
KPVTSFYDIPASASVNIQLEHQILILSVDPWRIRQILIELNGLTSDSQYWTVSNKWEVPT  
KPLPSFYDIPASASVNIQLEHQILILSLDARHIRQILIELHGMA-ERPFWMTVNTKWEVVP  
ASLSDDWMCHSKMSRVDVGALERQLISCTNANTVRILLVKLCATAPGKPLWAINPSWDVPPQ

-----  
VYSGVILGIKDNLTRDLVYILMAKGLHCSTVKDFSHAKQLFAACLELVTEFSPKLRQVML  
VYSGVILGIKDNLTRDLVYILMAKGLHCSTVKDFSHAKQLFAACLELVTEFSPKLRQVML  
VYSSVILGIKDNLTRDLVYILMAKGLHCSTVKDFSHAKQLFAACLELVTEFSPKLRQVML  
VYSSVILGIKDNLTRDLVYILMAKGLHCSTVKDFPHSKQLFTAACLELVTEFSPKLRQVML  
VYSSVILGIKDNLTRDLVYILMAKGLHCSTVKDFPHSKQLFTAACLELVTEFSPKLRQVML  
VYGNVILGIKDNLTRDLVYILMAKGLHCCAIDKFVHAKQLFAACLELVTEFSPKLRQVML  
IYTGSLGIKDNLTRDLVYVLLAKGLHCSAIDKDYPRAKQLLSACLELVTEFSPKLRQVML  
DYVNVLAIKDKLTRDLVYILLAKGLHCINITDFVHACQLFTAACLELVTEFSPKLRQVML  
PLKTLIMAMPVSFLQDFSYVLLGKARELATRGNYIDAVSMLSVLK-----SENQRQEMA

-----  
NEMLL-----LDIHTHEAGTGQA-GERPPSDLIS---R---VRGYLEMRLPDPIPLRQVI  
NEMLL-----LDIHTHEAGTGQA-GERPPSDLIS---R---VRGYLEMRLPDPIPLRQVI  
NEMLL-----LDIYTHEAGTGQS-GERPPSDLIS---R---VRGYLEMRLPDPIFRQVI  
NEMLL-----LDIRTHEAGVGQS-GERPPSDLIS---R---VRGYLEMRLPDPIPLRQVV  
NEMLL-----LDIRTHEAGVGQS-GERPPSDLIS---R---VRGYLEMRLPDPIPLRQVV  
NEMLL-----LDIYTHEAGAGAA-GERPPSDLIS---R---VRGYLEMRVPDPIPLRQVI  
NEMLL-----LDIYTHEASIGQ---ERPPDPLIS---R---VRGYLEMRVPDPIPLRQVV  
NELLL-----MEVRAHEEGTAKGRIVRPPDLVS---R---VRGYLEMRIHDLPLRQTV  
ANVQLMCKLITWEILHIQITQCLEEWHQKPLDLQSLGGRCKQCLGALQAG-DSIVRPRDI

-----  
AECECVAFMLNWRENEYLTQVPAFLLQSNPYVKLGQLLAATCKELPGPKESRRTAKDLWE  
AECECVAFMLNWRENEYLTQVPAFLLQSNPYVKLGQLLAATCKELPGPKESRRTAKDLWE  
SEECVAFMLNWRENEYLTQVPAFLLQSNPYVKLGQLLAATCKELPGPKESRRTAKDLWE  
AECECVAFMLNWRENEYLTQVPAFLFQNNPYVKLGQLLAATCKELPGPKESRRTAKDLWE  
AECECVAFMLNWRENEYLTQVPAFLFQNNPYVKLGQLLAATCKELPGPKESRRTAKDLWE  
AECECVAFMLNWRENEYLTQVPAFLFQNNPYVKLGQLLAATCKELPGPKESRRTAKDLWE  
AECECVAFLLNWRENEYLTMQVPLPLVQTNPNPYVKLGQLLAATCKELPGPKESRRTAKDLWE  
SEECVAFLLNWRENEYLTQVPPALVQNNPNPYVKLGQLLAATCKELPGPD-SRRTAKDLWE  
GEECVFVFLNWRENEYLTQVPQSLVNNPNYIKLGHLLASTCKELPGPKESRRTAKELWE  
LESCAIMLLNLTEFPPLLY-----LDKRAGPLELPLAFAATFIEMEKMGPKKVCRAWE

01:9606|9888|0#NP\_060334|INTS8|Homo\_sapiens  
01:9606|9888|NM\_017864|INTS8|Homo\_sapiens  
04:9913|9888|NM\_001102556|INTS8|Bos\_taurus  
07:10090|9888|NM\_001159595|Ints8|Mus\_musculus  
07:10090|9888|NM\_178112|Ints8|Mus\_musculus  
08:9031|9888|NM\_001040228|INTS8|Gallus\_gallus  
09:8364|9888|NM\_001097404|ints8|Xenopus\_tropicalis  
10:7955|9888|NM\_001020756|ints8|Danio\_rerio  
12:7227|9888|NM\_137318|IntS8|Drosophila\_melanogaster

00:1|Ac-MEPGSGPGSGGGGR  
01:9606|9888|0#NP\_060334|INTS8|Homo\_sapiens  
01:9606|9888|NM\_017864|INTS8|Homo\_sapiens  
04:9913|9888|NM\_001102556|INTS8|Bos\_taurus  
07:10090|9888|NM\_001159595|Ints8|Mus\_musculus  
07:10090|9888|NM\_178112|Ints8|Mus\_musculus  
08:9031|9888|NM\_001040228|INTS8|Gallus\_gallus  
09:8364|9888|NM\_001097404|ints8|Xenopus\_tropicalis  
10:7955|9888|NM\_001020756|ints8|Danio\_rerio  
12:7227|9888|NM\_137318|IntS8|Drosophila\_melanogaster

00:1|Ac-MEPGSGPGSGGGGR  
01:9606|9888|0#NP\_060334|INTS8|Homo\_sapiens  
01:9606|9888|NM\_017864|INTS8|Homo\_sapiens  
04:9913|9888|NM\_001102556|INTS8|Bos\_taurus  
07:10090|9888|NM\_001159595|Ints8|Mus\_musculus  
07:10090|9888|NM\_178112|Ints8|Mus\_musculus  
08:9031|9888|NM\_001040228|INTS8|Gallus\_gallus  
09:8364|9888|NM\_001097404|ints8|Xenopus\_tropicalis  
10:7955|9888|NM\_001020756|ints8|Danio\_rerio  
12:7227|9888|NM\_137318|IntS8|Drosophila\_melanogaster

00:1|Ac-MEPGSGPGSGGGGR  
01:9606|9888|0#NP\_060334|INTS8|Homo\_sapiens  
01:9606|9888|NM\_017864|INTS8|Homo\_sapiens  
04:9913|9888|NM\_001102556|INTS8|Bos\_taurus  
07:10090|9888|NM\_001159595|Ints8|Mus\_musculus  
07:10090|9888|NM\_178112|Ints8|Mus\_musculus  
08:9031|9888|NM\_001040228|INTS8|Gallus\_gallus  
09:8364|9888|NM\_001097404|ints8|Xenopus\_tropicalis  
10:7955|9888|NM\_001020756|ints8|Danio\_rerio  
12:7227|9888|NM\_137318|IntS8|Drosophila\_melanogaster

00:1|Ac-MEPGSGPGSGGGGR  
01:9606|9888|0#NP\_060334|INTS8|Homo\_sapiens  
01:9606|9888|NM\_017864|INTS8|Homo\_sapiens  
04:9913|9888|NM\_001102556|INTS8|Bos\_taurus  
07:10090|9888|NM\_001159595|Ints8|Mus\_musculus  
07:10090|9888|NM\_178112|Ints8|Mus\_musculus  
08:9031|9888|NM\_001040228|INTS8|Gallus\_gallus  
09:8364|9888|NM\_001097404|ints8|Xenopus\_tropicalis  
10:7955|9888|NM\_001020756|ints8|Danio\_rerio  
12:7227|9888|NM\_137318|IntS8|Drosophila\_melanogaster

VVVQICSVSSQHKRGNDGRVSLIKQRESTLGIMYRSELLSFIKKLREPLVLTIIILSLFVK  
VVVQICSVSSQHKRGNDGRVSLIKQRESTLGIMYRSELLSFIKKLREPLVLTIIILSLFVK  
VVVQICSVSSQHKRGNDGRVSLIKQRESTLGIMYRSELLSFIKKLREPLVLTIIILSLFVK  
VVVQICSVSNQHKRGNDGRVSLIKQRESTLGIMYRSELLSFIKKLREPLVLTIIILSLFVK  
VVVQICSVSNQHKRGNDGRVSLIKQRESTLGIMYRSELLSFIKKLREPLVLTIIILSLFVK  
VVVQICSVSNQHKRGNDGRVSLIKHRESTLGIMYRSELLSFIKKLREPLVLTIIILSLFVK  
VVVQICSVSNQHKRANDGRVCLIKNRDSTMGILYRNELVSFVKKLREPLVLTIIILSLFVK  
VVVQICSFSSQHKRTSDSRVSLLKQRESSLGILPRSKFITFVKKIREPLVLTIIILSLFVR  
LMLSMFL--NVPKRGSS-----GVGGISSLQAFQIRIRHQSVFGLAISMIGK

-----  
LHN-VREDIVNDITAEHISIWSSIPNLQSVDFEAVAITVKELVRYTLSINPNNHSLWII  
LHN-VREDIVNDITAEHISIWSSIPNLQSVDFEAVAITVKELVRYTLSINPNNHSLWII  
LHN-VREDIVNDITAEHISIWSSIPNLQSVDFEAVAITVKELVRYTALSINPNNHSLWII  
LHN-VREDIVNDITAEHISIWSSIPNLQSVDFEAVAITVKELVRYTLSINPNNHAWLII  
LHN-VREDIVNDITAEHISIWSSIPNLQSVDFEAVAITVKELVRYTLSINPNNHAWLII  
LHN-VREDIVNDITAHEYISIWSSIPNLQSVDFEAVAVTVKELVNYALTINSNNHFWLII  
LHN-LREDIVNDITAEHITIWSPCIPNLQAVDFDAVAVTVRELVSYALTINSNSHSLWTI  
LHSIVRDDIVNEVTAEHISIWPSLTLNLQSVDDAVVITLKELVNYALSLNPNNQSWLCT  
VHNILKDDPNHDLSCCEYMLWPTSINNPFVSYSLSVCETLQWLLSEALSYYPQTISWLKM

-----  
QADIYFATNQYSAALHYYLQAGAVCSDFFNKAVPPDVYTDQVIKRMIKCCSLLNCHTQVA  
QADIYFATNQYSAALHYYLQAGAVCSDFFNKAVPPDVYTDQVIKRMIKCCSLLNCHTQVA  
QADIYFATNQYSAALHYYLQAGAVCSDFFNKAVPPDVYTDQVIKRMIKCCSLLNCHTQVA  
QADIYFATNQHSAAALHYYLQAGAVCSDFFNKAVPPDVYTDQVIKRMIKCCSLLNCHTQVA  
QADIYFATNQHSAAALHYYLQAGAVCSDFFNKAVPPDVYTDQVIKRMIKCCSLLNCHTQVA  
QADIYFATNQYSAALHYYLQAGAVCSDFFNKMVPPDVYTDQVIKRMIKCCSLLNCHTQVA  
QADIYFATNEYSAAALNYYLQAGAVCSDFFTKQVPPDEVYTDQVIKRMIKCCSMLNCHTHVA  
QADIYFVTNQYSTAMHYYLQAGTVCSDFFTKPVPPDVYTDQVLKRMIKCCSLLNCHTQVA  
KGDLDLAIGNNESAMRCYVNALVTGTDYCTMPLQRNVADDYVIRKMIRCAANLGCNMQAT

-----  
ILCQFLREIDYKTAFKSLQEQN--SHDAMDSYYDYIWDVTILEYLYTLHHKRGETDKRQI  
ILCQFLREIDYKTAFKSLQEQN--SHDAMDSYYDYIWDVTILEYLYTLHHKRGETDKRQI  
ILCQFLREIDYKTAFKSLQEQN--SHDAMDSYYDYIWDVTILEYLYTLHHKRGETDKRQI  
ILCQFLREIDYKTAFKSLQEQN--SHDAMDSYYDYIWDVTILEYLYTLHHKRGETDKRQI  
ILCQFLREIDYKTAFKSLQEQN--SHDAMDSYYDYIWDVTILEYLYTLHHKRGETDKRQI  
ILCQFLREVDYKTAFKALQEQN--SHDAMDSYYEYIWDVTILEYLYTLHHKRGETDKRQI  
ILCQFLREIDYKTAFKALQEQN--SHDGMDSYYDYIWDVTILEYLYTLHHKRGETDKRQI  
VLCQFLREVDYMTAFKALQEQN--SHDSMDSFYDYIWDVTILEYLYTIHHKRGESDKRQV  
VLCQFLDEIDYGVIFKNLSEKSSNFTDAMDAYYSICIWDTTLLFEFIVNLHAKRGEHSRKLE

-----  
AIKAIGQTELNASNPEEVLQLAAQRRKKKFLQAMAKLYF-  
AIKAIGQTELNASNPNPEEVLQLAAQRRKKKFLQAMAKLYF-  
AIKAIGQTELNASNPEEVLQLAAQRRKKKFLQAMAKLYF-  
AIKAIGQTELNASNPEEVLQLAAQRRKKKFLQAMAKLYF-  
AIKAIGQTELNASNPEEVLQLAAQRRKKKFLQAMAKLYF-  
AIKAIGQTELNASNPEEVLQLAAQRRKKKFLQAMAKLYF-  
AIKAIGQTELNASNPEEVLQLAAQRRKKKFLQAMAKLYF-  
AIKAIGQTELNSSNPEEVLQLAAQRRKKKFLQSMAKLYF-  
AIKAIGRNELNSSNPEEVMQLAAQRRKKRFLQAMAKLYF-  
AISMMGTLELNANNNEEIKRESAMVRKSRFLRALAKQYLL

**Supplemental Figure S4. Sequence conservation analysis for acetylated peptides that lead to N-terminal extension toward 5' UTR**

If the acetylated peptides that lead to N-terminal extension are not uncontrolled leaky translation but have certain function, the extended sequence could be conserved in protein level between other species. For this, the protein sequences of the genes identified with N-terminal extension were compared with the ones of other orthologues to estimate the sequence conservancy between those species.
