# Supplementary material for: Discovery of noncanonical translation initiation sites through mass spectrometric analysis of protein N termini
Source: HighWire-hosted journal article supplement (doi:10.1101/gr.226050.117), 2017-11-21
Supplement: Supplemental_Table_S2.xlsx [file Supplemental_Table_S2.xlsx]

## Sheet: Supplemental Table S2
Supplemental Table S2. List of acetylated peptides mapping to 5’ UTRs that were identified using unmatched spectra from a previous human proteome map study.
Annotated Sequence	AD_Adrenal	AD_Colon	AD_Esophagus	AD_FrontalCortex	AD_GallBladder	AD_Heart	AD_Kidney	AD_Liver	AD_Lung	AD_Ovary	AD_Pancreas	AD_Prostate	AD_Rectum	AD_Retina	AD_SpinalCord	AD_Testis	AD_UrinaryBladder	Fetal_Brain	Fetal_Gut	Fetal_Heart	Fetal_Liver	Fetal_Ovary	Fetal_Placenta	Fetal_Testis	IM_Bcell	IM_CD4	IM_CD8	IM_Monocyte	IM_NK	IM_Platelet	Codon at -1 position	Codon at 1st position	Gene Symbol	Classification	Amino acid substitution
AAPCVPPSNHELVPITTENAPK	-	+	-	-	+	-	-	-	-	-	-	-	-	-	-	+	-	-	-	-	-	-	-	-	-	-	-	-	-	-	GUG	GCU	TNS1	N-terminal extension	-
AGAGAGAAGR	-	-	-	-	-	-	-	-	-	-	-	-	-	-	-	-	-	-	-	-	-	-	+	-	-	-	-	-	-	-	GGC	GCC	SPSB1	N-terminal extension	-
AVPLVLCGHLAK	-	-	-	-	-	-	-	-	-	-	+	-	-	+	-	+	-	-	-	-	-	-	-	-	-	-	-	-	-	-	GUG	GCU	HSP90AA1	N-terminal extension	-
LAFPSPGSLTLPLEIVDGK	-	-	-	-	-	-	-	-	-	-	-	-	-	-	-	-	-	+	-	-	-	-	-	+	-	-	-	-	-	-	GAG	CUG	KRT23	N-terminal extension	-
PAGTYHGDSDLQLER	-	-	-	+	-	-	-	-	-	-	-	-	-	-	-	-	-	+	-	-	-	-	-	-	-	-	-	-	-	-	GCA	CCU	TUBB4A	N-terminal extension	-
AAAAVAAATAAVK	-	-	-	-	-	-	-	-	-	-	-	-	-	-	-	-	-	+	-	-	-	-	-	-	-	-	-	-	-	-	GUG	GCG	GDI1	N-terminal extension	-
AAPELGPGATIEAGAAR	-	-	-	-	-	-	-	-	-	-	-	-	-	+	-	-	-	-	-	-	-	+	-	-	-	+	+	-	-	-	GUG	GCC	HDGF	N-terminal extension	-
AAPGGALASVSFDSR	-	-	-	-	-	-	-	-	-	-	-	-	-	-	-	-	-	-	-	-	-	-	+	-	-	-	-	-	-	-	GUG	GCA	CHTOP	N-terminal extension	-
AGAAHSPHGGQPPR	-	-	-	-	-	-	-	-	-	-	-	-	-	-	-	-	-	-	-	-	-	-	-	-	-	+	-	-	-	-	CUG	GCC	RGS14	N-terminal extension	-
AVATATGAGGAAGQR	-	-	-	-	-	-	-	+	-	-	-	-	-	-	-	-	-	-	-	-	+	-	-	-	-	-	-	-	-	-	CUG	GCG	SLC35A3	N-terminal extension	-
MEVEASSSGHPEPK	-	-	-	-	-	-	-	-	-	-	-	-	-	+	-	-	-	-	-	-	-	-	-	-	-	-	-	-	-	-	GCG	CUG	COPS7A	N-terminal extension	+
MEQFAAAAAHSTPVR	-	-	-	+	-	-	-	-	-	-	-	-	-	-	-	-	-	-	-	-	-	-	-	-	-	-	-	-	-	-	GCC	CUG	EPB41L3	N-terminal extension	+
AAAAAAAAAAGAGAGR	-	-	-	-	-	-	-	-	-	-	-	-	-	-	-	-	-	-	-	-	-	-	-	-	-	-	+	-	-	-	GCG	GCG	KANSL1L	uORF	-
AAAAAAAAAAGGGAR	-	-	-	-	-	-	-	-	-	-	-	-	-	-	-	+	-	-	-	-	+	-	-	-	+	+	+	+	-	-	GCC	GCG	HDAC2	uORF	-
AAAAAAAAAAPLCR	-	-	-	-	-	-	-	-	-	-	-	-	-	-	-	-	-	-	-	-	-	-	-	-	-	-	+	-	-	-	GAA	GCG	GRK5	uORF	-
AAAAAAAAVSVPAAAAGPCR	-	-	-	-	+	-	-	-	-	+	+	-	-	-	-	-	-	+	+	-	-	-	+	+	-	-	+	-	-	-	GCC	GCC	SMAD9	uORF	-
CSLILFAFNTLNDLTPPSFK	-	-	-	-	-	-	-	-	-	-	-	-	-	-	-	-	-	+	-	-	-	-	-	+	-	+	-	-	-	-	AAC	UGU	CCR5	uORF	-
EAAVAAAAAAAAAAAK	-	-	-	-	-	-	-	-	-	-	-	-	-	-	-	-	-	+	-	+	-	-	+	-	-	-	-	-	-	-	GCU	GAG	ADARB1	uORF	-
AAAAAAAAAGAGAGR	-	-	-	-	-	-	-	-	-	-	-	-	-	-	-	+	-	-	-	+	+	-	-	-	+	+	+	+	-	-	GCG	GCG	KANSL1L	uORF	-
Supplemental Table S2. List of acetylated peptides mapping to 5’ UTRs that were identified using unmatched spectra from a previous human proteome map study.
Codon at 1st position indicates the codon for N-terminal amino acid of the acetylated peptide and codon at -1 position indicates the codon for 1 amino acid upstream of the N-terminal amino acid of the acetylated peptide.
